# Supplementary material
Source: MDPI journal article supplement (https://www.mdpi.com/1424-2818/13/10/480)
Supplement: s1 [file s1]

## Appendix

### Field description

| Column               | Explanation                                                                                                                  |
|----------------------|------------------------------------------------------------------------------------------------------------------------------|
| <i>Species</i>       | Accepted species in this list                                                                                                |
| <i>Family</i>        | Family name following Plants of the World Online 2021                                                                        |
| <i>All following</i> | Acc – Accepted; NL – Not Listed; Syn – Synonym; ? – Doubtful;                                                                |
| <i>Databases</i>     | AmUn – Ambiguous or Unresolved / Unplaced 2021                                                                               |
| <i>Atlantis</i>      | Biodiversity Data Bank of the Canary Islands: <a href="http://www.biodiversidadcanarias.es">www.biodiversidadcanarias.es</a> |
| <i>Muer</i>          | Muer 2016: Die Farn- und Blütenpflanzen der Kanarischen Inseln (book)                                                        |
| <i>POWO</i>          | Plants of the World Online, Kew: <a href="http://www.plantsoftheworldonline.org">www.plantsoftheworldonline.org</a>          |
| <i>WFO</i>           | World Flora Online: <a href="http://www.worldfloraonline.org">www.worldfloraonline.org</a> (prior: The Plant List)           |
| <i>COL</i>           | Catalogue of Life: <a href="http://www.catalogueoflife.org">www.catalogueoflife.org</a>                                      |
| <i>GBIF</i>          | Global Biodiversity Information Facility: <a href="http://www.gbif.org">www.gbif.org</a>                                     |
| <i>TRY</i>           | Plant Trait Database: <a href="http://www.try-db.org">www.try-db.org</a>                                                     |
| <i>POWO Syn</i>      | # Synonyms listed in Plants of the World Online                                                                              |
| <i>H</i>             | El Hierro                                                                                                                    |
| <i>P</i>             | La Palma                                                                                                                     |
| <i>G</i>             | La Gomera                                                                                                                    |
| <i>T</i>             | Tenerife                                                                                                                     |
| <i>C</i>             | Gran Canaria                                                                                                                 |
| <i>F</i>             | Fuerteventura                                                                                                                |
| <i>L</i>             | Lanzarote                                                                                                                    |
| <i>Endemic</i>       | A – Canary Islands Archipelago Endemic; Island acronym – Single Island Endemic                                               |
| <i>Native</i>        | S – Surely native; P – Probably native                                                                                       |
| <i>Non native</i>    | S – Surely non-native; P – Probably non-native; I – surely invasive                                                          |
| <i>Ornam Crop</i>    | O – Ornamental plant; C – crop                                                                                               |

## 1 Main Table

| Species Name                                                                                                           | Family        | Atlantis | Muer | POWO | WFO  | COL  | GBIF | TRY | POWO Syn | H | P | G | T | C | F | L | Endemic Status | Native | Non native | Ornam Crop |
|------------------------------------------------------------------------------------------------------------------------|---------------|----------|------|------|------|------|------|-----|----------|---|---|---|---|---|---|---|----------------|--------|------------|------------|
| <i>Aaronsohnia pubescens</i> (Desf.) K.Bremer & Humphries subsp. <i>maroccana</i> (P. W. Ball) H. Förther & D. Podlech | Asteraceae    | Acc      | Acc  | Acc  | AmUn | Acc  | Acc  | NL  | 2        |   |   |   |   |   | 1 | 1 |                | P      |            |            |
| <i>Abutilon grandifolium</i> (Willd.) Sweet                                                                            | Malvaceae     | Acc      | Syn  | Acc  | Acc  | Acc  | Acc  | Acc | 10       | 1 | 1 | 1 | 1 | 1 |   | 1 |                |        | I          | O          |
| <i>Acacia cyclops</i> G. Don                                                                                           | Fabaceae      | Acc      | Acc  | Acc  | Acc  | Acc  | Acc  | Acc | 3        |   | 1 |   | 1 | 1 | 1 | 1 |                |        | I          | O          |
| <i>Acacia dealbata</i> Link                                                                                            | Fabaceae      | Acc      | Acc  | Acc  | Acc  | Acc  | Acc  | Acc | 3        | 1 | 1 |   | 1 |   |   |   |                |        | S          | O          |
| <i>Acacia decurrens</i> (J.C.Wendl.) Willd.                                                                            | Fabaceae      | NL       | NL   | Acc  | Acc  | Acc  | Acc  | Acc | 11       |   |   |   | 1 |   |   |   |                |        | S          | O          |
| <i>Acacia mearnsii</i> De Wild.                                                                                        | Fabaceae      | Acc      | NL   | Acc  | Acc  | Acc  | Acc  | Acc | 1        |   |   |   | 1 |   |   |   |                |        | S          | O          |
| <i>Acacia melanoxylon</i> R.Br.                                                                                        | Fabaceae      | Acc      | Acc  | Acc  | Acc  | Acc  | Acc  | Acc | 6        |   |   |   | 1 |   |   |   |                |        | I          | O          |
| <i>Acacia salicina</i> Lindl.                                                                                          | Fabaceae      | Acc      | Acc  | Acc  | Acc  | Acc  | Acc  | Acc | 4        |   |   |   | 1 |   | 1 |   |                |        | I          | O          |
| <i>Acacia saligna</i> (Labill.) Wendl.                                                                                 | Fabaceae      | Acc      | Acc  | Acc  | Acc  | Acc  | Acc  | Acc | 5        |   | 1 | 1 | 1 | 1 | 1 | 1 |                |        | I          | O          |
| <i>Acanthus mollis</i> L.                                                                                              | Acanthaceae   | Acc      | Acc  | Acc  | Acc  | Acc  | Acc  | Acc | 5        |   | 1 | 1 | 1 | 1 |   |   |                |        | S          | O          |
| <i>Acer campestre</i> L.                                                                                               | Sapindaceae   | Acc      | Acc  | Acc  | Acc  | Acc  | Acc  | Acc | 52       |   |   |   | 1 |   |   |   |                |        | S          | O          |
| <i>Acer pseudoplatanus</i> L.                                                                                          | Sapindaceae   | Acc      | Acc  | Acc  | Acc  | Acc  | Acc  | Acc | 17       |   |   |   |   | 1 |   |   |                |        | S          | O          |
| <i>Achillea maritima</i> (L.) Ehrend. & Y.P.Guo                                                                        | Asteraceae    | Acc      | Acc  | Acc  | Acc  | Acc  | Syn  | Acc | 6        |   |   |   |   | 1 |   | 1 |                | P      |            |            |
| <i>Achillea millefolium</i> L.                                                                                         | Asteraceae    | Acc      | Acc  | Acc  | Acc  | Acc  | Acc  | Acc | 128      |   |   |   |   |   | 1 |   |                |        | S          |            |
| <i>Achyranthes aspera</i> L. var. <i>sicula</i> L.                                                                     | Amaranthaceae | NL       | NL   | Acc  | Acc  | Syn  | Syn  | Acc | 10       | 1 | 1 | 1 | 1 | 1 |   |   |                |        | S          |            |
| <i>Acokanthera oblongifolia</i> (Hochst.) Benth. & Hook.f. ex B.D.Jacks                                                | Apocynaceae   | NL       | NL   | Acc  | Acc  | Acc  | Acc  | Acc | 5        |   | 1 | 1 | 1 | 1 | 1 |   |                |        | S          |            |
| <i>Adenocarpus foliolosus</i> (Aiton) DC. var. <i>foliolosus</i>                                                       | Fabaceae      | NL       | Acc  | NL   | NL   | AmUn | Acc  | NL  |          | 1 | 1 | 1 | 1 | 1 |   |   | A              | S      |            |            |
| <i>Adenocarpus ombriosus</i> Ceballos & Ortuno                                                                         | Fabaceae      | Acc      | Acc  | Acc  | Acc  | Acc  | Acc  | NL  | 0        | 1 |   |   |   |   |   |   | H              | S      |            |            |

| Species Name                                                                                                            | Family        | Atlantis | Muer | POWO | WFO | COL  | GBIF | TRY | POWO Syn | H | P | G | T | C | F | L | Endemic Status | Native | Non native | Ornam Crop |
|-------------------------------------------------------------------------------------------------------------------------|---------------|----------|------|------|-----|------|------|-----|----------|---|---|---|---|---|---|---|----------------|--------|------------|------------|
| <i>Adenocarpus viscosus</i> (Willd.) Webb & Berthel. subsp. <i>viscosus</i>                                             | Fabaceae      | Acc      | Acc  | NL   | NL  | AmUn | Acc  | NL  |          |   |   | 1 | 1 |   |   |   | A              | S      |            |            |
| <i>Adenocarpus viscosus</i> (Willd.) Webb & Berthel. subsp. <i>spartioides</i> (Webb & Berthel.) Rivas Mart. & Belmonte | Fabaceae      | Acc      | Acc  | Syn  | Acc | AmUn | Acc  | Syn |          |   | 1 |   |   |   |   |   | P              | S      |            |            |
| <i>Adiantum capillus-veneris</i> L.                                                                                     | Pteridaceae   | Acc      | Acc  | Acc  | Acc | Acc  | Acc  | Acc | 34       | 1 | 1 | 1 | 1 | 1 | 1 | 1 |                | P      |            |            |
| <i>Adiantum hispidulum</i> Sw.                                                                                          | Pteridaceae   | Acc      | Acc  | Acc  | Acc | Acc  | Acc  | Acc | 16       |   |   |   | 1 | 1 |   |   |                |        | S          |            |
| <i>Adiantum raddianum</i> C. Presl                                                                                      | Pteridaceae   | Acc      | Acc  | Acc  | Acc | Acc  | Acc  | Acc | 16       |   | 1 |   | 1 | 1 |   |   |                |        | S          |            |
| <i>Adiantum reniforme</i> L. subsp. <i>reniforme</i>                                                                    | Pteridaceae   | Acc      | NL   | Acc  | NL  | Acc  | Acc  | NL  | 0        |   | 1 | 1 | 1 |   | 1 | 1 |                | S      |            |            |
| <i>Adiantum reniforme</i> L. subsp. <i>pusillum</i> (Bolle) Rivas-Mart.                                                 | Pteridaceae   | Acc      | NL   | Acc  | NL  | Acc  | Acc  | NL  | 0        | 1 | 1 | 1 | 1 | 1 |   |   |                | S      |            |            |
| <i>Adonis microcarpa</i> DC.                                                                                            | Ranunculaceae | Acc      | Acc  | Acc  | Acc | Acc  | Acc  | Acc | 1        |   | 1 |   | 1 | 1 | 1 | 1 |                |        | P          |            |
| <i>Aegilops biuncialis</i> Vis.                                                                                         | Poaceae       | Acc      | Syn  | Acc  | Syn | Acc  | Acc  | Syn | 15       |   |   | 1 |   |   |   |   |                | P      |            |            |
| <i>Aegilops geniculata</i> Roth                                                                                         | Poaceae       | Acc      | Acc  | Acc  | Acc | Acc  | Acc  | Acc | 22       |   | 1 | 1 | 1 |   |   | 1 |                | P      |            |            |
| <i>Aegilops neglecta</i> Req. ex Bertol.                                                                                | Poaceae       | Acc      | Acc  | Acc  | Acc | Acc  | Acc  | Acc | 27       |   |   |   | 1 |   |   | 1 |                | P      |            |            |
| <i>Aeonium aizoon</i> (Bolle) T.H.M.Mes                                                                                 | Crassulaceae  | Acc      | Acc  | Acc  | Acc | Acc  | Acc  | NL  | 2        |   |   |   | 1 |   |   |   | T              | S      |            |            |
| <i>Aeonium appendiculatum</i> Bañares                                                                                   | Crassulaceae  | Acc      | Acc  | Acc  | Acc | Acc  | Acc  | NL  | 0        |   |   | 1 |   |   |   |   | G              | S      |            |            |
| <i>Aeonium arboreum</i> Webb & Berthel. subsp. <i>arboreum</i>                                                          | Crassulaceae  | Acc      | Acc  | NL   | Syn | Acc  | Acc  | NL  |          |   |   |   |   | 1 |   |   | C              | S      |            |            |
| <i>Aeonium arboreum</i> Webb & Berthel. subsp. <i>holochrysum</i> (H.Y.Liu) Bañares                                     | Crassulaceae  | Acc      | Acc  | Acc  | Acc | Acc  | Acc  | NL  | 8        | 1 | 1 | 1 | 1 |   |   |   | A              | S      |            |            |
| <i>Aeonium aureum</i> (C.Sm. ex Hornem.) T.H.M.Mes                                                                      | Crassulaceae  | Acc      | Acc  | Acc  | Acc | Acc  | Acc  | Acc | 6        |   | 1 | 1 | 1 | 1 |   |   | A              | S      |            |            |
| <i>Aeonium balsamiferum</i> Webb & Berthel.                                                                             | Crassulaceae  | Acc      | Acc  | Acc  | Acc | Acc  | Acc  | NL  | 1        |   |   |   |   |   | 1 | 1 | A              | S      |            |            |
| <i>Aeonium canariense</i> (L.) Webb & Berthel. var. <i>canariense</i>                                                   | Crassulaceae  | Acc      | Acc  | NL   | NL  | Acc  | Acc  | NL  |          |   |   |   | 1 |   |   |   | T              | S      |            |            |
| <i>Aeonium canariense</i> (L.) Webb & Berthel. subsp. <i>latifolium</i> (Burchard) Bañares                              | Crassulaceae  | Acc      | Acc  | Acc  | Acc | Acc  | Acc  | NL  | 3        |   |   | 1 |   |   |   |   | G              | S      |            |            |
| <i>Aeonium castello-paivae</i> Bolle                                                                                    | Crassulaceae  | Acc      | Acc  | Acc  | Acc | Acc  | Acc  | NL  | 3        |   |   | 1 |   |   |   |   | G              | S      |            |            |

| Species Name                                                                   | Family       | Atlantis | Muer | POWO | WFO | COL  | GBIF | TRY | POWO Syn | H | P | G | T | C | F | L | Endemic Status | Native | Non native | Ornam Crop |
|--------------------------------------------------------------------------------|--------------|----------|------|------|-----|------|------|-----|----------|---|---|---|---|---|---|---|----------------|--------|------------|------------|
| <i>Aeonium ciliatum</i> (Willd.) Webb & Berthel.                               | Crassulaceae | Acc      | Acc  | Acc  | Acc | Acc  | Acc  | NL  | 2        |   |   |   | 1 |   |   |   | T              | S      |            |            |
| <i>Aeonium cuneatum</i> Webb & Berthel.                                        | Crassulaceae | Acc      | Acc  | Acc  | Acc | Acc  | Acc  | Acc | 2        |   |   |   | 1 |   |   |   | T              | S      |            |            |
| <i>Aeonium davidbramwellii</i> H.Y.Liu                                         | Crassulaceae | Acc      | Acc  | Acc  | Acc | Acc  | Acc  | Acc | 1        |   | 1 |   |   |   |   |   | P              | S      |            |            |
| <i>Aeonium decorum</i> Webb ex Bolle                                           | Crassulaceae | Acc      | Acc  | Acc  | Acc | Acc  | Acc  | Acc | 2        |   |   | 1 |   |   |   |   | G              | S      |            |            |
| <i>Aeonium diplocyclum</i> (Webb ex Bolle) T.H.M.Mes                           | Crassulaceae | Acc      | Acc  | Acc  | Acc | Acc  | Acc  | Acc | 2        | 1 | 1 | 1 |   |   |   |   | A              | S      |            |            |
| <i>Aeonium dodrantale</i> (Willd.) T.H.M.Mes                                   | Crassulaceae | Acc      | Syn  | Acc  | Acc | AmUn | Acc  | NL  | 4        |   |   |   | 1 |   |   |   | T              | S      |            |            |
| <i>Aeonium gomerense</i> (Praeger) Praeger                                     | Crassulaceae | Acc      | Acc  | Acc  | Acc | Acc  | Acc  | NL  | 1        |   |   | 1 |   |   |   |   | G              | S      |            |            |
| <i>Aeonium goochiae</i> Webb & Berthel.                                        | Crassulaceae | Acc      | Acc  | Acc  | Acc | Acc  | Acc  | Acc | 2        |   | 1 |   |   |   |   |   | P              | S      |            |            |
| <i>Aeonium haworthii</i> Webb & Berthel.                                       | Crassulaceae | Acc      | Acc  | Acc  | Acc | Acc  | Acc  | Acc | 0        |   | 1 |   | 1 |   |   |   | A              | S      |            |            |
| <i>Aeonium hierrense</i> (R.P.Murray) Pit. & Proust.                           | Crassulaceae | Acc      | Acc  | Acc  | Acc | Acc  | Acc  | Acc | 1        | 1 | 1 |   |   |   |   |   | A              | S      |            |            |
| <i>Aeonium lancerottense</i> (Praeger) Praeger                                 | Crassulaceae | Acc      | Acc  | Acc  | Acc | Acc  | Acc  | NL  | 1        |   |   |   |   |   |   | 1 | L              | S      |            |            |
| <i>Aeonium lindleyi</i> Webb & Berthel. subsp. <i>lindleyi</i>                 | Crassulaceae | Acc      | Acc  | NL   | Acc | Acc  | Acc  | NL  |          |   |   |   | 1 |   |   |   | T              | S      |            |            |
| <i>Aeonium lindleyi</i> Webb & Berthel. subsp. <i>viscatum</i> (Bolle) Bañares | Crassulaceae | Acc      | Acc  | Acc  | Acc | Acc  | Acc  | NL  | 3        |   |   | 1 |   |   |   |   | G              | S      |            |            |
| <i>Aeonium liui</i> Arango                                                     | Crassulaceae | Acc      | NL   | NL   | NL  | AmUn | Acc  | NL  |          |   |   |   | 1 |   |   |   | T              | S      |            |            |
| <i>Aeonium mascaense</i> Bramwell                                              | Crassulaceae | Acc      | Acc  | Acc  | Acc | Acc  | Acc  | NL  | 0        |   |   |   | 1 |   |   |   | T              | S      |            |            |
| <i>Aeonium nobile</i> (Praeger) Praeger                                        | Crassulaceae | Acc      | Acc  | Acc  | Acc | Acc  | Acc  | Acc | 1        |   | 1 |   |   |   |   |   | P              | S      |            |            |
| <i>Aeonium palmense</i> Webb ex Christ                                         | Crassulaceae | Syn      | Syn  | Acc  | Syn | Syn  | Syn  | NL  | 6        | 1 | 1 |   |   |   |   |   | A              | S      |            |            |
| <i>Aeonium percarneum</i> (R.P.Murray) Pit. & Proust.                          | Crassulaceae | Acc      | Acc  | Acc  | Acc | Acc  | Acc  | Acc | 3        |   |   |   |   | 1 |   |   | C              | S      |            |            |
| <i>Aeonium pseudourbicum</i> Banares                                           | Crassulaceae | Acc      | Acc  | Acc  | Syn | Acc  | Acc  | Syn | 0        |   |   |   | 1 |   |   |   | T              | S      |            |            |
| <i>Aeonium rubrolineatum</i> Svent.                                            | Crassulaceae | NL       | Syn  | Acc  | Syn | Syn  | Syn  | NL  | 1        |   |   | 1 |   |   |   |   | G              | S      |            | O          |
| <i>Aeonium saundersii</i> Bolle                                                | Crassulaceae | Acc      | Acc  | Acc  | Acc | Acc  | Acc  | NL  | 2        |   |   | 1 |   |   |   |   | G              | S      |            |            |
| <i>Aeonium sedifolium</i> (Webb ex Bolle) Pit. & Proust.                       | Crassulaceae | Acc      | Acc  | Acc  | Acc | Acc  | Acc  | Acc | 3        |   | 1 | 1 | 1 |   |   |   | A              | S      |            |            |
| <i>Aeonium simsii</i> (Sweet) Stearn                                           | Crassulaceae | Acc      | Acc  | Acc  | Acc | Acc  | Acc  | Acc | 6        |   |   |   |   | 1 |   |   | C              | S      |            |            |
| <i>Aeonium smithii</i> (Sims) Webb & Berthel.                                  | Crassulaceae | Acc      | Acc  | Acc  | Acc | Acc  | Acc  | Acc | 2        |   |   |   | 1 |   |   |   | T              | S      |            |            |



| Species Name                                                                                          | Family         | Atlantis | Muer | POWO | WFO | COL  | GBIF | TRY | POWO Syn | H | P | G | T | C | F | L | Endemic Status | Native | Non native | Ornam Crop |
|-------------------------------------------------------------------------------------------------------|----------------|----------|------|------|-----|------|------|-----|----------|---|---|---|---|---|---|---|----------------|--------|------------|------------|
| <i>Aeonium spathulatum</i> (Hornem.) Praeger                                                          | Crassulaceae   | Acc      | Acc  | Acc  | Acc | Acc  | Acc  | Acc | 9        | 1 | 1 | 1 | 1 | 1 |   |   | A              | S      |            |            |
| <i>Aeonium tabuliforme</i> (Haw.) Webb & Berthel.                                                     | Crassulaceae   | Acc      | Syn  | Acc  | Acc | AmUn | Acc  | Acc | 9        |   |   |   | 1 |   |   |   | T              | S      |            |            |
| <i>Aeonium undulatum</i> Webb & Berthel.                                                              | Crassulaceae   | Acc      | Acc  | Acc  | Acc | Acc  | Acc  | Acc | 3        |   |   |   |   | 1 |   |   | C              | S      |            |            |
| <i>Aeonium urbicum</i> (C.Sm. ex Hornem.) Webb & Berthel. subsp. <i>urbicum</i>                       | Crassulaceae   | Acc      | Acc  | NL   | NL  | Acc  | Acc  | NL  |          |   |   |   | 1 |   |   |   | T              | S      |            |            |
| <i>Aeonium urbicum</i> (C.Sm. ex Hornem.) Webb & Berthel. subsp. <i>meridionale</i> (Bañares) Bañares | Crassulaceae   | Acc      | Acc  | Acc  | Syn | Acc  | Acc  | Syn | 0        |   |   |   | 1 |   |   |   | T              | S      |            |            |
| <i>Aeonium valverdense</i> (Praeger) Praeger                                                          | Crassulaceae   | Acc      | Acc  | Acc  | Acc | Acc  | Acc  | NL  | 1        | 1 |   |   |   |   |   |   | H              | S      |            |            |
| <i>Aeonium virgineum</i> Webb ex Christ                                                               | Crassulaceae   | Syn      | Syn  | Acc  | Syn | Acc  | Syn  | NL  | 3        |   |   |   |   | 1 |   |   | C              | S      |            |            |
| <i>Aeonium volkeri</i> E.Hern. & Bañares                                                              | Crassulaceae   | Acc      | Acc  | Acc  | Acc | Acc  | Acc  | NL  | 0        |   |   |   | 1 |   |   |   | T              | S      |            |            |
| <i>Agapanthus praecox</i> Willd. subsp. <i>orientalis</i> (F.M.Leight.) F.M.Leight.                   | Amaryllidaceae | Acc      | Acc  | Acc  | Acc | Acc  | Acc  | NL  | 1        |   |   | 1 | 1 | 1 |   |   |                |        | S          | O          |
| <i>Agave americana</i> L. var. <i>franzosini</i> Sprenger                                             | Asparagaceae   | Syn      | NL   | Acc  | Syn | Acc  | Acc  | NL  | 2        |   | 1 | 1 |   | 1 |   |   |                |        | S          | O          |
| <i>Agave angustifolia</i> Haw.                                                                        | Asparagaceae   | Acc      | NL   | Acc  | Acc | Acc  | Acc  | NL  | 0        |   |   |   | 1 | 1 | 1 |   |                |        | S          | O          |
| <i>Agave attenuata</i> Salm-Dyck                                                                      | Asparagaceae   | Acc      | Acc  | Acc  | Acc | Acc  | Acc  | Acc | 0        |   | 1 | 1 | 1 | 1 | 1 | 1 |                |        | S          | O          |
| <i>Agave filifera</i> Salm-Dyck                                                                       | Asparagaceae   | Acc      | NL   | Acc  | Acc | Acc  | Acc  | Acc | 4        |   |   |   | 1 | 1 |   |   |                |        | I          | O          |
| <i>Agave fourcroydes</i> Lem.                                                                         | Asparagaceae   | Acc      | Acc  | Acc  | Acc | Acc  | Acc  | Acc | 2        |   | 1 | 1 | 1 | 1 | 1 | 1 |                |        | I          | O          |
| <i>Agave lechuguilla</i> Torr.                                                                        | Asparagaceae   | Acc      | NL   | Acc  | Acc | AmUn | Acc  | Acc | 5        |   |   | 1 |   | 1 |   |   |                |        | S          | O          |
| <i>Agave macroacantha</i> Zucc.                                                                       | Asparagaceae   | Acc      | NL   | Acc  | Acc | Acc  | Acc  | Acc | 10       |   | 1 |   | 1 | 1 | 1 |   |                |        | S          | O          |
| <i>Agave murpheyi</i> F.Gibson                                                                        | Asparagaceae   | Acc      | NL   | Acc  | Acc | Acc  | Acc  | Acc | 0        |   |   |   |   | 1 |   |   |                |        | I          | O          |
| <i>Agave oteroi</i> G.D.Starr & TJ Davis                                                              | Asparagaceae   | Acc      | NL   | Acc  | NL  | AmUn | Acc  | NL  | 0        |   |   |   |   | 1 |   |   |                |        | S          | O          |
| <i>Agave salmiana</i> Otto ex Salm-Dyck var. <i>ferox</i> (K.Koch) Gentry                             | Asparagaceae   | NL       | Syn  | Acc  | Acc | Acc  | Acc  | Acc | 6        |   |   | 1 | 1 | 1 |   |   |                |        | I          | O          |
| <i>Agave sisalana</i> Perrine                                                                         | Asparagaceae   | Acc      | Acc  | Acc  | Acc | Acc  | Acc  | Acc | 5        | 1 | 1 |   | 1 | 1 | 1 | 1 |                |        | I          | O          |
| <i>Agave tequilana</i> F.A.C.Weber                                                                    | Asparagaceae   | NL       | NL   | Acc  | Acc | Acc  | Acc  | Acc | 5        |   |   |   | 1 | 1 |   |   |                |        | I          | O          |
| <i>Agave vivipara</i> L.                                                                              | Asparagaceae   | Acc      | NL   | Acc  | Acc | Acc  | Acc  | Acc | 1        |   |   |   |   | 1 |   |   |                |        | I          | O          |

| Species Name                                                                                      | Family          | Atlantis | Muer | POWO | WFO | COL  | GBIF | TRY | POWO Syn | H | P | G | T | C | F | L | Endemic Status | Native | Non native | Ornam Crop |
|---------------------------------------------------------------------------------------------------|-----------------|----------|------|------|-----|------|------|-----|----------|---|---|---|---|---|---|---|----------------|--------|------------|------------|
| <i>Ageratina adenophora</i> (Spreng.) R.M.King & H.Rob.                                           | Asteraceae      | Acc      | Acc  | Acc  | Acc | Acc  | Acc  | Acc | 5        | 1 | 1 | 1 | 1 | 1 | 1 |   |                |        | I          | O          |
| <i>Ageratina riparia</i> (Regel) R.M.King & H.Rob.                                                | Asteraceae      | Acc      | Acc  | Acc  | Acc | Acc  | Acc  | Acc | 6        |   | 1 | 1 | 1 |   |   |   |                |        | I          | O          |
| <i>Ageratum houstonianum</i> Mill.                                                                | Asteraceae      | Acc      | Acc  | Acc  | Acc | Acc  | Acc  | Acc | 19       |   |   |   | 1 |   |   |   |                |        | S          | O          |
| <i>Agrimonia eupatoria</i> L.                                                                     | Rosaceae        | Acc      | Acc  | Acc  | Acc | Acc  | Acc  | Acc | 16       |   |   | 1 | 1 |   |   |   |                | P      |            |            |
| <i>Agrostemma githago</i> L.                                                                      | Caryophyllaceae | Acc      | Acc  | Acc  | Acc | Acc  | Acc  | Acc | 18       |   |   |   |   | 1 |   |   |                |        | P          |            |
| <i>Agrostis capillaris</i> L.                                                                     | Poaceae         | Acc      | Acc  | Acc  | Acc | Acc  | Acc  | Acc | 70       |   | 1 |   |   |   |   |   |                | P      |            |            |
| <i>Agrostis castellana</i> Boiss. & Reut.                                                         | Poaceae         | Acc      | Acc  | Acc  | Acc | Acc  | Acc  | Acc | 23       | 1 | 1 | 1 | 1 | 1 | 1 | 1 |                | P      |            |            |
| <i>Agrostis pourretii</i> Willd.                                                                  | Poaceae         | Syn      | Syn  | Acc  | Acc | Acc  | Acc  | Acc | 10       |   |   |   | 1 |   |   |   |                |        | I          |            |
| <i>Agrostis stolonifera</i> L. subsp. <i>stolonifera</i>                                          | Poaceae         | Acc      | Acc  | NL   | Syn | AmUn | Acc  | Syn |          |   | 1 |   |   |   |   |   |                |        | P          |            |
| <i>Aichryson bituminosum</i> Bañares                                                              | Crassulaceae    | Acc      | Acc  | Acc  | Acc | Acc  | Acc  | NL  | 0        |   |   |   |   | 1 |   |   | C              | S      |            |            |
| <i>Aichryson bollei</i> Webb ex Bolle                                                             | Crassulaceae    | Acc      | Acc  | Acc  | Acc | Acc  | Acc  | Acc | 1        |   | 1 |   |   |   |   |   | P              | S      |            |            |
| <i>Aichryson brevipetalum</i> Praeger                                                             | Crassulaceae    | Acc      | Acc  | Acc  | Acc | Acc  | Acc  | NL  | 0        |   | 1 |   |   |   |   |   | P              | S      |            |            |
| <i>Aichryson dichotomum</i> (DC.) Webb & Berthel.                                                 | Crassulaceae    | NL       | NL   | Acc  | Syn | Syn  | Acc  | NL  | 3        |   |   | 1 | 1 |   |   |   | A              | S      |            |            |
| <i>Aichryson laxum</i> (Haw.) Bramwell subsp. <i>laxum</i>                                        | Crassulaceae    | Acc      | NL   | NL   | NL  | Acc  | Acc  | NL  |          | 1 | 1 | 1 | 1 | 1 | 1 |   | A              | S      |            |            |
| <i>Aichryson laxum</i> (Haw.) Bramwell subsp. <i>latipetalum</i> (Bañares & M.A. Marrero) Bañares | Crassulaceae    | Acc      | NL   | Acc  | NL  | AmUn | Acc  | NL  | 0        | 1 | 1 | 1 | 1 | 1 | 1 |   | A              | S      |            |            |
| <i>Aichryson pachycaulon</i> Bolle subsp. <i>pachycaulon</i>                                      | Crassulaceae    | Acc      | Acc  | NL   | NL  | Acc  | Acc  | NL  | 1        |   |   |   |   |   | 1 |   | F              | S      |            |            |
| <i>Aichryson pachycaulon</i> Bolle subsp. <i>gonzalezhernandezii</i> (G.Kunkel) Bramwell          | Crassulaceae    | Acc      | Acc  | Acc  | Acc | Acc  | Acc  | NL  | 1        |   |   | 1 |   |   |   |   | G              | S      |            |            |
| <i>Aichryson pachycaulon</i> Bolle subsp. <i>immaculatum</i> (Webb ex Christ) Bramw.              | Crassulaceae    | Acc      | Acc  | Acc  | Acc | Acc  | Acc  | NL  | 2        |   |   |   | 1 |   |   |   | T              | S      |            |            |
| <i>Aichryson pachycaulon</i> Bolle subsp. <i>parviflorum</i> (Bolle) Bramwell                     | Crassulaceae    | Acc      | Acc  | Acc  | Acc | Acc  | Acc  | NL  | 2        |   | 1 |   |   |   |   |   | P              | S      |            |            |
| <i>Aichryson pachycaulon</i> Bolle subsp. <i>praetermissum</i> Bramw.                             | Crassulaceae    | Acc      | Acc  | Acc  | NL  | Acc  | Acc  | NL  | 0        |   |   |   |   | 1 |   |   | C              | S      |            |            |
| <i>Aichryson palmense</i> Webb ex Bolle                                                           | Crassulaceae    | Acc      | Acc  | Acc  | Acc | Acc  | Acc  | Acc | 0        |   | 1 |   |   |   |   |   | P              | S      |            |            |
| <i>Aichryson parlatoarei</i> Bolle                                                                | Crassulaceae    | Acc      | Acc  | Acc  | Acc | Acc  | Acc  | Acc | 1        | 1 | 1 | 1 | 1 | 1 |   |   | A              | S      |            |            |

| Species Name                                                                                      | Family         | Atlantis | Muer | POWO | WFO | COL  | GBIF | TRY | POWO Syn | H | P | G | T | C | F | L | Endemic Status | Native | Non native | Ornam Crop |
|---------------------------------------------------------------------------------------------------|----------------|----------|------|------|-----|------|------|-----|----------|---|---|---|---|---|---|---|----------------|--------|------------|------------|
| <i>Aichryson porphyrogenetos</i> Bolle                                                            | Crassulaceae   | Acc      | Acc  | Acc  | Acc | Acc  | Acc  | NL  | 1        |   |   |   |   | 1 |   |   | C              | S      |            |            |
| <i>Aichryson punctatum</i> (C.Sm. ex Link) Webb & Berthel.                                        | Crassulaceae   | Acc      | Acc  | Acc  | Acc | Acc  | Acc  | Acc | 5        | 1 | 1 | 1 | 1 | 1 | 1 |   | A              | S      |            |            |
| <i>Aichryson roseum</i> Bañares                                                                   | Crassulaceae   | Acc      | NL   | Acc  | NL  | Acc  | Acc  | NL  | 0        |   |   |   |   | 1 |   |   | C              | S      |            |            |
| <i>Aichryson tortuosum</i> (Aiton) Webb & Berthel. var. <i>tortuosum</i>                          | Crassulaceae   | Syn      | Acc  | NL   | NL  | AmUn | Acc  | NL  |          |   |   |   |   |   |   | 1 | L              | S      |            |            |
| <i>Aichryson tortuosum</i> (Aiton) Webb & Berthel. subsp. <i>bethencourtianum</i> (Bolle) Bañares | Crassulaceae   | Acc      | Syn  | Acc  | Syn | Syn  | Acc  | NL  | 4        |   |   |   |   |   | 1 |   | F              | S      |            |            |
| <i>Ailanthus altissima</i> (Mill.) Swingle                                                        | Simaroubaceae  | Acc      | Acc  | Acc  | Acc | Acc  | Acc  | Acc | 27       |   |   |   | 1 | 1 |   |   |                |        | I          | O          |
| <i>Aira caryophyllea</i> L. subsp. <i>caryophyllea</i>                                            | Poaceae        | Acc      | Acc  | NL   | Syn | AmUn | Syn  | Syn |          | 1 | 1 | 1 | 1 | 1 | 1 | 1 |                | P      |            |            |
| <i>Aira caryophyllea</i> L. subsp. <i>plesiantha</i> Jord. ex Boreau                              | Poaceae        | Acc      | Acc  | NL   | Syn | Syn  | Syn  | NL  |          |   | 1 |   |   |   |   |   |                | P      |            |            |
| <i>Aira cupaniana</i> Guss.                                                                       | Poaceae        | Acc      | Acc  | Acc  | Acc | Acc  | Acc  | Acc | 6        |   |   |   | 1 |   | 1 | 1 |                | P      |            |            |
| <i>Aira elegans</i> Willd. ex Roem. & Schult.                                                     | Poaceae        | Acc      | Syn  | Acc  | NL  | Acc  | Acc  | NL  | 16       |   |   | 1 |   |   |   |   |                | P      |            |            |
| <i>Aira praecox</i> L.                                                                            | Poaceae        | Acc      | Acc  | Acc  | Acc | Acc  | Acc  | Acc | 14       |   |   |   | 1 |   |   |   |                | P      |            |            |
| <i>Aizoanthemopsis hispanica</i> (L.) Klak                                                        | Aizoaceae      | Acc      | Syn  | Acc  | NL  | Acc  | Acc  | NL  | 3        |   |   | 1 |   |   | 1 | 1 |                | P      |            |            |
| <i>Aizoon canariense</i> L.                                                                       | Aizoaceae      | Acc      | Acc  | Acc  | Acc | Acc  | Acc  | Acc | 5        | 1 | 1 | 1 | 1 | 1 | 1 | 1 |                | S      |            |            |
| <i>Ajuga iva</i> (L.) Schreb.                                                                     | Lamiaceae      | Acc      | Syn  | Acc  | Acc | Acc  | Acc  | Acc | 16       | 1 | 1 | 1 | 1 | 1 | 1 | 1 |                | P      |            |            |
| <i>Ajuga reptans</i> L.                                                                           | Lamiaceae      | NL       | NL   | Acc  | Acc | Acc  | Acc  | Acc | 13       |   | 1 |   |   |   |   |   |                |        | S          |            |
| <i>Alcea rosea</i> L.                                                                             | Malvaceae      | Acc      | Acc  | Acc  | Acc | Acc  | Acc  | Acc | 17       |   |   |   | 1 | 1 | 1 |   |                |        | S          | O          |
| <i>Alchemilla microcarpa</i> Boiss. & Reut.                                                       | Rosaceae       | Syn      | Syn  | Acc  | Syn | Syn  | Syn  | NL  | 1        | 1 | 1 | 1 | 1 | 1 |   |   |                | P      |            |            |
| <i>Alisma lanceolatum</i> With.                                                                   | Alismataceae   | Acc      | Acc  | Acc  | Acc | Acc  | Acc  | Acc | 2        |   |   |   |   | 1 |   |   |                | P      |            |            |
| <i>Allagopappus canariensis</i> (Willd.) Greuter                                                  | Asteraceae     | Acc      | Acc  | Acc  | Acc | Acc  | Acc  | Acc | 7        |   |   | 1 | 1 | 1 |   |   | A              | S      |            |            |
| <i>Allagopappus viscosissimus</i> Bolle                                                           | Asteraceae     | Acc      | Acc  | Acc  | Acc | Acc  | Acc  | NL  | 1        |   |   |   |   | 1 |   |   | C              | S      |            |            |
| <i>Allium ampeloprasum</i> L.                                                                     | Amaryllidaceae | Acc      | Acc  | Acc  | Acc | Acc  | Acc  | Acc | 32       |   | 1 |   | 1 | 1 |   | 1 |                |        | P          |            |
| <i>Allium canariense</i> (Regel) N.Friesen & P. Schönfelder subsp. <i>canariense</i>              | Amaryllidaceae | Acc      | Acc  | Acc  | NL  | Acc  | Acc  | NL  | 0        | 1 | 1 | 1 | 1 | 1 | 1 | 1 | A              | S      |            |            |

| Species Name                                                                                                                 | Family           | Atlantis | Muer | POWO | WFO | COL  | GBIF | TRY | POWO Syn | H | P | G | T | C | F | L | Endemic Status | Native | Non native | Ornam Crop |
|------------------------------------------------------------------------------------------------------------------------------|------------------|----------|------|------|-----|------|------|-----|----------|---|---|---|---|---|---|---|----------------|--------|------------|------------|
| <i>Allium canariense</i> (Regel) N.Friesen & P. Schönfelder subsp. <i>obtusitepetalum</i> (Svent.) N.Friesen & P.Schönfelder | Amaryllidaceae   | Acc      | Acc  | Acc  | NL  | AmUn | Acc  | NL  | 2        |   |   |   |   |   |   | 1 | L              | S      |            |            |
| <i>Allium neapolitanum</i> Cirillo                                                                                           | Amaryllidaceae   | Syn      | Syn  | Acc  | Acc | AmUn | Acc  | Acc | 17       |   |   |   | 1 |   |   |   |                | P      |            |            |
| <i>Allium nigrum</i> L.                                                                                                      | Amaryllidaceae   | Acc      | Acc  | Acc  | Acc | Acc  | Acc  | Acc | 13       |   |   |   | 1 | 1 |   |   |                |        | P          |            |
| <i>Allium paniculatum</i> L. subsp. <i>pallens</i> (L.) K.Richt.                                                             | Amaryllidaceae   | Syn      | NL   | Acc  | NL  | Acc  | Acc  | NL  | 5        |   |   |   |   |   |   | 1 |                |        | S          |            |
| <i>Allium rotundum</i> L.                                                                                                    | Amaryllidaceae   | Acc      | Acc  | Acc  | Acc | Acc  | Acc  | Acc | 26       |   |   |   | 1 | 1 |   |   |                | P      |            |            |
| <i>Allium sphaerocephalon</i> L.                                                                                             | Amaryllidaceae   | Syn      | Acc  | Acc  | Acc | Acc  | Acc  | Acc | 1        |   |   |   | 1 |   |   |   |                | P      |            |            |
| <i>Allium vineale</i> L.                                                                                                     | Amaryllidaceae   | Acc      | Acc  | Acc  | Acc | Acc  | Acc  | Acc | 18       |   | 1 |   | 1 | 1 | 1 | 1 |                | P      |            |            |
| <i>Aloe arborescens</i> Mill.                                                                                                | Xanthorrhoeaceae | Acc      | Acc  | Acc  | Acc | Acc  | Acc  | Acc | 2        |   | 1 |   | 1 | 1 |   | 1 |                |        | S          | O          |
| <i>Aloe maculata</i> All.                                                                                                    | Xanthorrhoeaceae | Acc      | NL   | Acc  | Acc | Acc  | Acc  | Acc | 0        |   | 1 |   |   | 1 | 1 |   |                |        | S          |            |
| <i>Aloe vera</i> (L.) Burm.f.                                                                                                | Xanthorrhoeaceae | Acc      | Acc  | Acc  | Acc | Acc  | Acc  | Acc | 13       |   | 1 | 1 | 1 | 1 | 1 | 1 |                |        | S          | O          |
| <i>Aloiampelos ciliaris</i> (Haw.) Klopper & Gideon F.Sm.                                                                    | Xanthorrhoeaceae | Syn      | Syn  | Acc  | NL  | Acc  | Acc  | Acc | 1        |   |   |   | 1 | 1 |   |   |                |        | S          | O          |
| <i>Alopecurus geniculatus</i> L.                                                                                             | Poaceae          | Acc      | Acc  | Acc  | Acc | Acc  | Acc  | Acc | 11       |   |   |   | 1 |   |   |   |                |        | P          |            |
| <i>Alopecurus myosuroides</i> Huds.                                                                                          | Poaceae          | Acc      | Acc  | Acc  | Acc | Acc  | Acc  | Acc | 10       |   | 1 |   | 1 | 1 | 1 |   |                |        | P          |            |
| <i>Alternanthera caracasana</i> Kunth                                                                                        | Amaranthaceae    | Acc      | Acc  | Acc  | Acc | Acc  | Acc  | Acc | 10       | 1 | 1 | 1 | 1 | 1 |   |   |                |        | S          |            |
| <i>Alyssum granatense</i> Boiss. & Reut.                                                                                     | Brassicaceae     | Acc      | NL   | Acc  | Acc | Acc  | Acc  | Acc | 6        |   |   |   |   | 1 |   |   |                | P      |            |            |
| <i>Alyssum simplex</i> Rudolph                                                                                               | Brassicaceae     | Acc      | Syn  | Acc  | Acc | Acc  | Acc  | Acc | 10       |   |   |   | 1 | 1 |   |   |                | P      |            |            |
| <i>Amaranthus albus</i> L.                                                                                                   | Amaranthaceae    | Acc      | Acc  | Acc  | Acc | Acc  | Acc  | Acc | 11       |   |   |   |   | 1 |   |   |                |        | S          |            |
| <i>Amaranthus blitoides</i> S.Watson                                                                                         | Amaranthaceae    | Acc      | Acc  | Acc  | Acc | Acc  | Acc  | Acc | 7        |   | 1 |   | 1 | 1 | 1 | 1 |                |        | S          |            |
| <i>Amaranthus blitum</i> L. subsp. <i>blitum</i>                                                                             | Amaranthaceae    | NL       | Acc  | NL   | Syn | AmUn | Acc  | Syn |          | 1 | 1 | 1 | 1 | 1 | 1 | 1 |                |        | S          |            |
| <i>Amaranthus blitum</i> L. subsp. <i>emarginatus</i> (Salzm. ex Uline & Bray) Carretero, Muñoz Garm. & Pedrol               | Amaranthaceae    | Syn      | Syn  | Acc  | Acc | Syn  | Acc  | Acc | 9        | 1 | 1 |   | 1 | 1 |   | 1 |                |        | S          |            |
| <i>Amaranthus caudatus</i> L.                                                                                                | Amaranthaceae    | Acc      | Acc  | Acc  | Acc | Acc  | Acc  | Acc | 13       |   |   |   | 1 | 1 |   |   |                |        | S          |            |
| <i>Amaranthus cruentus</i> L.                                                                                                | Amaranthaceae    | Acc      | Acc  | Acc  | Acc | Acc  | Acc  | Acc | 29       | 1 | 1 |   | 1 | 1 |   | 1 |                |        | S          | O          |

| Species Name                                                                     | Family         | Atlantis | Muer | POWO | WFO  | COL  | GBIF | TRY | POWO Syn | H | P | G | T | C | F | L | Endemic Status | Native | Non native | Ornam Crop |
|----------------------------------------------------------------------------------|----------------|----------|------|------|------|------|------|-----|----------|---|---|---|---|---|---|---|----------------|--------|------------|------------|
| <i>Amaranthus deflexus</i> L.                                                    | Amaranthaceae  | Acc      | Acc  | Acc  | Acc  | Acc  | Acc  | Acc | 11       | 1 | 1 |   | 1 | 1 | 1 | 1 |                |        | S          |            |
| <i>Amaranthus graecizans</i> L. subsp. <i>silvestris</i> (Vill.) Brenan          | Amaranthaceae  | Acc      | Acc  | Acc  | Acc  | Syn  | Syn  | Syn | 5        |   | 1 |   | 1 | 1 |   | 1 |                |        | S          |            |
| <i>Amaranthus hybridus</i> L. subsp. <i>hybridus</i>                             | Amaranthaceae  | Acc      | NL   | NL   | Syn  | AmUn | Acc  | Syn |          |   | 1 | 1 | 1 | 1 |   | 1 |                |        | S          |            |
| <i>Amaranthus hybridus</i> L. subsp. <i>quitensis</i> (Kunth) Costea & Carretero | Amaranthaceae  | Acc      | NL   | Acc  | Acc  | AmUn | Syn  | Acc | 6        |   | 1 |   | 1 |   |   |   |                |        | S          |            |
| <i>Amaranthus muricatus</i> (Gillies ex Moq.) Hieron.                            | Amaranthaceae  | Acc      | Acc  | Acc  | Acc  | Acc  | Acc  | Acc | 2        |   | 1 | 1 | 1 | 1 | 1 | 1 |                |        | S          |            |
| <i>Amaranthus powellii</i> S. Watson                                             | Amaranthaceae  | Acc      | NL   | Acc  | Acc  | Acc  | Acc  | Acc | 9        |   |   |   | 1 |   | 1 |   |                |        | S          |            |
| <i>Amaranthus retroflexus</i> L.                                                 | Amaranthaceae  | Acc      | Acc  | Acc  | Acc  | Acc  | Acc  | Acc | 15       | 1 |   |   | 1 | 1 |   | 1 |                |        | S          |            |
| <i>Amaranthus standleyanus</i> Parodi ex Covas                                   | Amaranthaceae  | Acc      | Acc  | Acc  | Acc  | Acc  | Acc  | Acc | 2        | 1 |   |   |   |   |   |   |                |        | S          |            |
| <i>Amaranthus viridis</i> L.                                                     | Amaranthaceae  | Acc      | Acc  | Acc  | Acc  | Acc  | Acc  | Acc | 11       | 1 | 1 | 1 | 1 | 1 | 1 | 1 |                |        | S          |            |
| <i>Amaryllis belladonna</i> L.                                                   | Amaryllidaceae | Acc      | Acc  | Acc  | Acc  | Acc  | Acc  | Acc | 20       |   | 1 | 1 | 1 | 1 |   |   |                |        | I          | O          |
| <i>Ammi majus</i> L.                                                             | Apiaceae       | Acc      | Acc  | Acc  | Acc  | Acc  | Acc  | Acc | 37       | 1 | 1 | 1 | 1 | 1 | 1 | 1 |                | P      |            |            |
| <i>Ammi procerum</i> Lowe                                                        | Apiaceae       | Acc      | Acc  | Syn  | Syn  | Acc  | Acc  | NL  | 0        |   | 1 |   |   | 1 |   |   |                | P      |            |            |
| <i>Ammochloa pungens</i> (Schreb.) Boiss.                                        | Poaceae        | Acc      | Acc  | Acc  | Acc  | Acc  | Acc  | Acc | 5        |   |   |   | 1 |   |   |   |                |        | P          |            |
| <i>Ammodaucus leucotrichus</i> Coss. subsp. <i>nanocarpus</i> Beltrán-Tej.       | Apiaceae       | Syn      | Syn  | Acc  | NL   | Acc  | Acc  | NL  | 0        |   |   |   | 1 |   | 1 |   |                | S      |            |            |
| <i>Amphilophium buccinatorium</i> (DC.) L.G.Lohmann                              | Bignoniaceae   | Syn      | Syn  | Acc  | Acc  | Acc  | Acc  | Acc | 10       |   | 1 |   |   | 1 |   |   |                |        | S          | O          |
| <i>Anacyclus clavatus</i> (Desf.) Pers.                                          | Asteraceae     | Acc      | Acc  | Acc  | Acc  | Acc  | Acc  | Acc | 18       |   | 1 |   |   |   |   | 1 |                |        | P          |            |
| <i>Anacyclus radiatus</i> Loisel. subsp. <i>radiatus</i>                         | Asteraceae     | Acc      | Acc  | Acc  | Syn  | Acc  | Acc  | NL  | 8        | 1 |   | 1 | 1 |   | 1 | 1 |                | S      |            |            |
| <i>Anacyclus radiatus</i> Loisel. subsp. <i>coronatus</i> (Murb.) Humphries      | Asteraceae     | Acc      | Acc  | Acc  | Acc  | Acc  | Acc  | NL  | 4        |   |   |   | 1 | 1 | 1 | 1 |                | S      |            |            |
| <i>Anagyris latifolia</i> Brouss. ex Willd.                                      | Fabaceae       | Acc      | Acc  | Acc  | AmUn | AmUn | Acc  | Acc | 1        |   | 1 | 1 | 1 | 1 |   |   | A              | S      |            |            |
| <i>Anastatica hierochuntica</i> L.                                               | Brassicaceae   | Acc      | Acc  | Acc  | Acc  | Acc  | Acc  | Acc | 2        |   |   |   |   |   | 1 |   |                |        | P          |            |
| <i>Anchusa azurea</i> Mill.                                                      | Boraginaceae   | Acc      | Acc  | Acc  | Acc  | Acc  | Acc  | Acc | 14       | 1 | 1 | 1 | 1 | 1 | 1 | 1 |                | P      |            |            |
| <i>Andrachne telephioides</i> L.                                                 | Phyllantaceae  | Acc      | Acc  | Acc  | Acc  | Acc  | Acc  | Acc | 10       |   |   |   |   | 1 | 1 |   |                |        | P          |            |

| Species Name                                                                                                | Family          | Atlantis | Muer | POWO | WFO | COL | GBIF | TRY | POWO Syn | H | P | G | T | C | F | L | Endemic Status | Native | Non native | Ornam Crop |
|-------------------------------------------------------------------------------------------------------------|-----------------|----------|------|------|-----|-----|------|-----|----------|---|---|---|---|---|---|---|----------------|--------|------------|------------|
| <i>Andropogon distachyos</i> L.                                                                             | Poaceae         | Acc      | Acc  | Acc  | Acc | Acc | Acc  | Acc | 6        |   |   | 1 | 1 |   |   |   |                | P      |            |            |
| <i>Andryala integrifolia</i> L.                                                                             | Asteraceae      | Acc      | Acc  | Acc  | Acc | Acc | Acc  | Acc | 25       | 1 |   |   |   | 1 |   |   |                | P      |            |            |
| <i>Andryala perezii</i> M. Z. Ferreira, R. Jardim, Alv. Fern., & M. Seq.                                    | Asteraceae      | Acc      | NL   | Acc  | NL  | Acc | Acc  | NL  | 0        |   |   |   | 1 | 1 | 1 | 1 | A              | S      |            |            |
| <i>Andryala pinnatifida</i> Aiton subsp. <i>pinnatifida</i>                                                 | Asteraceae      | Acc      | Acc  | Acc  | Syn | Acc | Acc  | NL  | 7        | 1 |   | 1 | 1 | 1 |   |   | A              | S      |            |            |
| <i>Andryala pinnatifida</i> Aiton subsp. <i>buchiana</i> (Sch.Bip.) Reyes-Bet. & A.Santos                   | Asteraceae      | NL       | Acc  | Acc  | Acc | Acc | Acc  | NL  | 1        |   |   |   |   |   | 1 | 1 | A              | S      |            |            |
| <i>Andryala pinnatifida</i> Aiton subsp. <i>cuneifolia</i> (Sch. Bip.) M. Z. Ferreira, Alv. Fern. & M. Seq. | Asteraceae      | Acc      | NL   | Acc  | NL  | Acc | Acc  | NL  | 1        | 1 |   |   | 1 |   | 1 | 1 | A              | S      |            |            |
| <i>Andryala pinnatifida</i> Aiton subsp. <i>latifolia</i> (Bornm.) G.Kunkel                                 | Asteraceae      | NL       | NL   | Acc  | NL  | Acc | Acc  | NL  | 7        | 1 |   |   | 1 |   |   |   |                | S      |            |            |
| <i>Andryala pinnatifida</i> Aiton subsp. <i>preauxiana</i> (Sch.Bip.) G.Kunkel                              | Asteraceae      | Acc      | Acc  | Acc  | Acc | Acc | Acc  | NL  | 0        |   |   |   |   | 1 |   |   | C              | S      |            |            |
| <i>Andryala pinnatifida</i> Aiton subsp. <i>teydensis</i> (Sch.Bip.) Rivas Mart. & al.                      | Asteraceae      | Acc      | Acc  | Acc  | Acc | Acc | Acc  | NL  | 1        |   |   |   | 1 |   |   |   | T              | S      |            |            |
| <i>Andryala pinnatifida</i> Aiton subsp. <i>webbii</i> (Sch.Bip. ex Christ) G. Kunkel                       | Asteraceae      | Acc      | NL   | NL   | Acc | Syn | Acc  | NL  |          |   | 1 | 1 |   |   |   |   | A              | S      |            |            |
| <i>Andryala rothia</i> Pers.                                                                                | Asteraceae      | Syn      | Syn  | Acc  | Acc | Acc | Acc  | NL  | 7        |   | 1 |   | 1 |   |   |   | A              | S      |            |            |
| <i>Andryala webbii</i> Christ                                                                               | Asteraceae      | Syn      | Acc  | Acc  | Acc | Acc | Acc  | NL  | 1        |   | 1 | 1 |   |   |   |   | A              | S      |            |            |
| <i>Anethum graveolens</i> L.                                                                                | Apiaceae        | Acc      | Acc  | Acc  | Acc | Acc | Acc  | Acc | 20       | 1 | 1 | 1 | 1 | 1 | 1 | 1 |                |        | P          | C          |
| <i>Anogramma leptophylla</i> (L.) Link                                                                      | Hemionitidaceae | Acc      | Acc  | Acc  | Acc | Acc | Acc  | Acc | 17       | 1 | 1 | 1 | 1 | 1 | 1 | 1 |                | S      |            |            |
| <i>Anredera cordifolia</i> (Ten.) Steenis                                                                   | Basellaceae     | Acc      | Acc  | Acc  | Acc | Acc | Acc  | Acc | 8        | 1 | 1 | 1 | 1 | 1 | 1 |   |                |        | I          | O          |
| <i>Anthemis arvensis</i> L.                                                                                 | Asteraceae      | Acc      | Acc  | Acc  | Acc | Acc | Acc  | Acc | 1        |   |   | 1 | 1 | 1 | 1 | 1 |                |        | P          |            |
| <i>Anthemis cotula</i> L.                                                                                   | Asteraceae      | Acc      | Acc  | Acc  | Acc | Acc | Acc  | Acc | 10       | 1 | 1 | 1 | 1 | 1 | 1 | 1 |                |        | P          |            |
| <i>Anthoxanthum aristatum</i> Boiss.                                                                        | Poaceae         | Acc      | Acc  | Acc  | Acc | Acc | Acc  | Acc | 8        | 1 | 1 | 1 | 1 | 1 | 1 | 1 |                | P      |            |            |
| <i>Anthoxanthum odoratum</i> L.                                                                             | Poaceae         | Acc      | Acc  | Acc  | Acc | Acc | Acc  | Acc | 9        |   | 1 |   | 1 | 1 |   |   |                | P      |            |            |
| <i>Anthriscus caucalis</i> M.Bieb.                                                                          | Apiaceae        | Acc      | Acc  | Acc  | Acc | Acc | Acc  | Acc | 21       | 1 |   |   | 1 |   |   |   |                |        | S          |            |
| <i>Antigonon leptopus</i> Hook. & Arn.                                                                      | Polygonaceae    | Acc      | Acc  | Acc  | Acc | Acc | Acc  | Acc | 5        |   | 1 |   |   | 1 |   |   |                |        | S          |            |

| Species Name                                                                                  | Family          | Atlantis | Muer | POWO | WFO | COL  | GBIF | TRY | POWO Syn | H | P | G | T | C | F | L | Endemic Status | Native | Non native | Ornam Crop |
|-----------------------------------------------------------------------------------------------|-----------------|----------|------|------|-----|------|------|-----|----------|---|---|---|---|---|---|---|----------------|--------|------------|------------|
| <i>Antirrhinum majus</i> L.                                                                   | Antirrhinaceae  | Acc      | Acc  | Acc  | Acc | Acc  | Acc  | Acc | 7        | 1 | 1 | 1 | 1 | 1 |   | 1 |                |        | P          | O          |
| <i>Apium graveolens</i> L.                                                                    | Apiaceae        | Acc      | Acc  | Acc  | Acc | Acc  | Acc  | Acc | 27       | 1 | 1 | 1 | 1 | 1 | 1 | 1 |                |        | P          | C          |
| <i>Apium nodiflorum</i> (L.) Lag.                                                             | Apiaceae        | Syn      | Acc  | Acc  | Acc | Syn  | Syn  | Acc | 18       |   | 1 | 1 | 1 | 1 |   |   |                | P      |            |            |
| <i>Apium repens</i> (Jacq.) Lag.                                                              | Apiaceae        | Syn      | Acc  | Acc  | Acc | Syn  | Syn  | Acc | 6        |   |   |   | 1 |   |   |   |                | P      |            |            |
| <i>Apteranthes burchardii</i> (N.E.Br.) Plowes subsp. <i>burchardii</i>                       | Asclepiadaceae  | NL       | Syn  | Acc  | NL  | AmUn | Syn  | NL  | 0        |   |   |   |   |   | 1 | 1 | A              | S      |            | O          |
| <i>Aquilegia vulgaris</i> L.                                                                  | Ranunculaceae   | Acc      | Acc  | Acc  | Acc | Acc  | Acc  | Acc | 28       |   |   |   | 1 |   |   |   |                |        | S          | O          |
| <i>Arabidopsis thaliana</i> (L.) Heynh.                                                       | Brassicaceae    | Acc      | Acc  | Acc  | Acc | Acc  | Acc  | Acc | 21       | 1 | 1 | 1 | 1 | 1 |   |   |                | P      |            |            |
| <i>Arabis caucasica</i> Willd.                                                                | Brassicaceae    | Syn      | Acc  | Acc  | Acc | Acc  | Acc  | Acc | 18       | 1 | 1 | 1 | 1 | 1 |   |   |                | P      |            |            |
| <i>Arabis nova</i> Vill.                                                                      | Brassicaceae    | Syn      | NL   | Acc  | Acc | Acc  | Acc  | Acc | 11       |   | 1 |   | 1 | 1 |   |   |                | P      |            |            |
| <i>Arabis recta</i> Vill.                                                                     | Brassicaceae    | NL       | Acc  | Acc  | Acc | Syn  | Syn  | Acc | 18       |   | 1 |   | 1 | 1 |   |   |                | P      |            |            |
| <i>Arbutus canariensis</i> Duhamel                                                            | Auracariaceae   | Acc      | Acc  | Acc  | Acc | Acc  | Acc  | Acc | 3        | 1 | 1 | 1 | 1 | 1 |   |   | A              | S      |            |            |
| <i>Arbutus unedo</i> L.                                                                       | Ericaceae       | Acc      | Acc  | Acc  | Acc | Acc  | Acc  | Acc | 13       |   |   |   | 1 | 1 |   |   |                |        | I          | O          |
| <i>Arenaria serpyllifolia</i> L. subsp. <i>leptoclados</i> (Rchb.) Nyman                      | Caryophyllaceae | Syn      | Syn  | Syn  | Acc | Acc  | Acc  | Acc |          | 1 | 1 | 1 | 1 | 1 | 1 | 1 |                | P      |            |            |
| <i>Argemone mexicana</i> L.                                                                   | Papaveraceae    | Acc      | Acc  | Acc  | Acc | Acc  | Acc  | Acc | 18       |   | 1 |   | 1 | 1 |   |   |                |        | I          | O          |
| <i>Argemone ochroleuca</i> Sweet                                                              | Papaveraceae    | Acc      | Acc  | Acc  | Acc | Acc  | Acc  | Acc | 10       |   | 1 |   | 1 | 1 |   |   |                |        | S          | O          |
| <i>Argyranthemum adauctum</i> (Link) Humphries subsp. <i>adauctum</i>                         | Asteraceae      | Acc      | Acc  | Acc  | Syn | Acc  | Acc  | Syn | 1        |   |   |   | 1 |   |   |   | T              | S      |            |            |
| <i>Argyranthemum adauctum</i> (Link) Humphries subsp. <i>canariense</i> Humphries             | Asteraceae      | Acc      | Acc  | Acc  | Acc | Acc  | Acc  | NL  | 2        |   |   |   |   | 1 |   |   | C              | S      |            |            |
| <i>Argyranthemum adauctum</i> (Link) Humphries subsp. <i>dugourii</i> (Bolle) Humphries       | Asteraceae      | Acc      | Acc  | Acc  | Acc | Acc  | Acc  | NL  | 2        |   |   |   | 1 |   |   |   | T              | S      |            |            |
| <i>Argyranthemum adauctum</i> (Link) Humphries subsp. <i>erythrocarpon</i> (Svent.) Humphries | Asteraceae      | Acc      | Acc  | Acc  | Acc | Acc  | Acc  | NL  | 0        | 1 |   |   |   |   |   |   | H              | S      |            |            |
| <i>Argyranthemum adauctum</i> (Link) Humphries subsp. <i>gracile</i> (Sch.Bip.) Humphries     | Asteraceae      | Acc      | Acc  | Acc  | Acc | Acc  | Acc  | NL  | 0        |   |   |   |   | 1 |   |   | C              | S      |            |            |

| Species Name                                                                                        | Family     | Atlantis | Muer | POWO | WFO | COL  | GBIF | TRY | POWO Syn | H | P | G | T | C | F | L | Endemic Status | Native | Non native | Ornam Crop |
|-----------------------------------------------------------------------------------------------------|------------|----------|------|------|-----|------|------|-----|----------|---|---|---|---|---|---|---|----------------|--------|------------|------------|
| <i>Argyranthemum adauctum</i> (Link) Humphries subsp. <i>jacobiifolium</i> (Sch.Bip.) Humphries     | Asteraceae | Syn      | Syn  | Acc  | Acc | AmUn | Syn  | NL  | 4        |   |   |   |   | 1 |   |   | C              | S      |            |            |
| <i>Argyranthemum adauctum</i> (Link) Humphries<br><i>A.Santos</i> subsp. <i>palmensis</i> A.Santos  | Asteraceae | Acc      | NL   | Acc  | NL  | AmUn | Acc  | NL  | 0        |   | 1 |   |   |   |   |   | P              | S      |            |            |
| <i>Argyranthemum broussonetii</i> (Pers.) Humphries<br>subsp. <i>broussonetii</i>                   | Asteraceae | Acc      | Acc  | Acc  | Syn | Acc  | Acc  | NL  | 6        |   |   |   | 1 |   |   |   | T              | S      |            |            |
| <i>Argyranthemum callichrysum</i> (Svent.) Humphries                                                | Asteraceae | Acc      | Acc  | Acc  | Acc | Acc  | Acc  | Acc | 1        |   |   | 1 |   |   |   |   | G              | S      |            |            |
| <i>Argyranthemum callichrysum</i> (Svent.) Humphries<br>subsp. <i>callichrysum</i>                  | Asteraceae | Syn      | Syn  | NL   | NL  | Syn  | Syn  | NL  |          |   |   | 1 |   |   |   |   | G              | S      |            |            |
| <i>Argyranthemum callichrysum</i> (Svent.) Humphries<br>subsp. <i>gomerensis</i> O.W. White         | Asteraceae | Syn      | Syn  | Syn  | NL  | Syn  | Syn  | NL  |          |   |   | 1 |   |   |   |   | G              | S      |            |            |
| <i>Argyranthemum coronopifolium</i> (Wild.) Webb                                                    | Asteraceae | Acc      | Acc  | Acc  | Acc | Acc  | Acc  | Acc | 16       |   |   |   | 1 |   |   |   | T              | S      |            |            |
| <i>Argyranthemum escarrei</i> (Svent.) Humphries                                                    | Asteraceae | Acc      | Acc  | Acc  | Acc | Acc  | Acc  | Acc | 1        |   |   |   |   | 1 |   |   | C              | S      |            |            |
| <i>Argyranthemum filifolium</i> (Sch.Bip.) Humphries                                                | Asteraceae | Acc      | Acc  | Acc  | Acc | Acc  | Acc  | NL  | 2        |   |   |   | 1 |   |   |   | T              | S      |            |            |
| <i>Argyranthemum foeniculaceum</i> (Willd.) Webb ex Sch.Bip.                                        | Asteraceae | Acc      | Acc  | Acc  | Acc | Acc  | Acc  | Acc | 5        |   |   |   | 1 |   |   |   | T              | S      |            |            |
| <i>Argyranthemum frutescens</i> (L.) Sch.Bip. subsp. <i>frutescens</i>                              | Asteraceae | Acc      | Acc  | Acc  | Syn | Acc  | Acc  | Syn | 5        | 1 | 1 |   | 1 | 1 |   | 1 | A              | S      |            |            |
| <i>Argyranthemum frutescens</i> (L.) Sch.Bip. subsp. <i>canariae</i> (Christ) Humphries             | Asteraceae | Acc      | Acc  | Acc  | Acc | Acc  | Acc  | NL  | 2        |   |   |   |   | 1 |   |   | C              | S      |            |            |
| <i>Argyranthemum frutescens</i> (L.) Sch.Bip. subsp. <i>foeniculaceum</i> (Pit. & Proust) Humphries | Asteraceae | Acc      | Acc  | Acc  | Acc | Acc  | Acc  | Acc | 1        |   |   | 1 |   |   |   |   | G              | S      |            |            |
| <i>Argyranthemum frutescens</i> (L.) Sch.Bip. subsp. <i>gracilescens</i> (Christ) Humphries         | Asteraceae | Acc      | Acc  | Acc  | Acc | Acc  | Acc  | NL  | 0        |   |   |   | 1 |   |   |   | T              | S      |            |            |
| <i>Argyranthemum frutescens</i> (L.) Sch.Bip. subsp. <i>parviflorum</i> (Pit. & Proust) Humphries   | Asteraceae | Acc      | Acc  | Acc  | NL  | Acc  | Acc  | NL  | 1        |   |   | 1 | 1 |   |   |   | A              | S      |            |            |
| <i>Argyranthemum frutescens</i> (L.) Sch.Bip. subsp. <i>pumilum</i> Humphries                       | Asteraceae | Acc      | Acc  | Acc  | Acc | Acc  | Acc  | NL  | 1        |   |   |   |   | 1 |   |   | C              | S      |            |            |
| <i>Argyranthemum frutescens</i> (L.) Sch.Bip. subsp. <i>succulentum</i> Humphries                   | Asteraceae | Acc      | Acc  | Acc  | NL  | Acc  | Acc  | NL  | 0        | 1 |   | 1 | 1 |   |   |   | A              | S      |            |            |



| Species Name                                                                                                         | Family            | Atlantis | Muer | POWO | WFO  | COL  | GBIF | TRY | POWO Syn | H | P | G | T | C | F | L | Endemic Status | Native | Non native | Ornam Crop |
|----------------------------------------------------------------------------------------------------------------------|-------------------|----------|------|------|------|------|------|-----|----------|---|---|---|---|---|---|---|----------------|--------|------------|------------|
| <i>Argyranthemum gracile</i> Webb ex Sch.Bip.                                                                        | Asteraceae        | Acc      | Acc  | Acc  | Acc  | Acc  | Acc  | Acc | 1        |   |   |   | 1 |   |   |   | T              | S      |            |            |
| <i>Argyranthemum haouarytheum</i> Humphries & Bramwell                                                               | Asteraceae        | Acc      | Acc  | Acc  | Acc  | Acc  | Acc  | Acc | 2        |   | 1 |   |   |   |   |   | P              | S      |            |            |
| <i>Argyranthemum hierrense</i> Humphries                                                                             | Asteraceae        | Acc      | Acc  | Acc  | Acc  | Acc  | Acc  | Acc | 0        | 1 |   |   |   |   |   |   | H              | S      |            |            |
| <i>Argyranthemum lemsii</i> Humphries                                                                                | Asteraceae        | Acc      | Acc  | Acc  | Acc  | Acc  | Acc  | Acc | 0        |   |   |   | 1 |   |   |   | T              | S      |            |            |
| <i>Argyranthemum lidii</i> Humphries                                                                                 | Asteraceae        | Acc      | Acc  | Acc  | Acc  | Acc  | Acc  | NL  | 1        |   |   |   |   | 1 |   |   | C              | S      |            |            |
| <i>Argyranthemum maderense</i> (D.Don) Humphries                                                                     | Asteraceae        | Acc      | Acc  | Acc  | Acc  | Acc  | Acc  | Acc | 3        |   |   |   |   |   |   | 1 | L              | S      |            |            |
| <i>Argyranthemum sundingii</i> L.Borgen                                                                              | Asteraceae        | Acc      | Acc  | Acc  | Acc  | Acc  | Acc  | NL  | 0        |   |   |   | 1 |   |   |   | T              | S      |            |            |
| <i>Argyranthemum sventenii</i> Humphries & Aldridge                                                                  | Asteraceae        | Acc      | Acc  | Acc  | Acc  | Acc  | Acc  | Acc | 0        | 1 |   |   |   |   |   |   | H              | S      |            |            |
| <i>Argyranthemum tenerifae</i> Humphries                                                                             | Asteraceae        | Acc      | Acc  | Acc  | Acc  | Acc  | Acc  | Acc | 10       |   |   |   | 1 |   |   |   | T              | S      |            |            |
| <i>Argyranthemum vincentii</i> Santos & Feria                                                                        | Asteraceae        | NL       | Acc  | NL   | AmUn | Acc  | Acc  | NL  |          |   |   |   | 1 |   |   |   | T              | S      |            |            |
| <i>Argyranthemum webbii</i> Sch.Bip.                                                                                 | Asteraceae        | Acc      | Acc  | Acc  | Acc  | Acc  | Acc  | Acc | 1        |   | 1 |   |   |   |   |   | P              | S      |            |            |
| <i>Argyranthemum winteri</i> (Svent.) Humphries                                                                      | Asteraceae        | Acc      | Acc  | Acc  | Acc  | Acc  | Acc  | Acc | 1        |   |   |   |   |   | 1 |   | F              | S      |            |            |
| <i>Argyrolobium armindae</i> Marrero Rodr.                                                                           | Fabaceae          | Acc      | Acc  | Acc  | AmUn | AmUn | Acc  | NL  | 0        |   |   |   |   | 1 |   |   | C              | S      |            |            |
| <i>Aria edulis</i> (Willd.) M. Roem.                                                                                 | Rosaceae          | Syn      | Syn  | Acc  | AmUn | Acc  | Acc  | NL  | 40       |   | 1 |   | 1 |   |   |   |                | P      |            |            |
| <i>Arisarum simorrhinum</i> Durieu                                                                                   | Araceae           | Acc      | Acc  | Acc  | Acc  | Acc  | Acc  | Acc | 1        |   |   |   | 1 | 1 | 1 | 1 |                | S      |            |            |
| <i>Aristida adscensionis</i> L. subsp. <i>adscensionis</i>                                                           | Poaceae           | Acc      | NL   | NL   | Syn  | AmUn | Acc  | Syn |          |   | 1 |   | 1 |   | 1 | 1 |                |        | P          |            |
| <i>Aristida adscensionis</i> L. subsp. <i>coerulescens</i> (Desf.) Bourreil & Trouin ex Auquier & J. Duvign.         | Poaceae           | Acc      | Syn  | Syn  | Syn  | Syn  | Syn  | NL  | 0        | 1 | 1 | 1 | 1 | 1 | 1 |   |                |        | P          |            |
| <i>Aristolochia paucinervis</i> Pomel                                                                                | Aristolochinaceae | Acc      | Acc  | Acc  | Acc  | Acc  | Acc  | Acc | 0        | 1 |   |   | 1 | 1 |   |   |                |        | S          |            |
| <i>Arnebia decumbens</i> (Vent.) Coss. & Kralik                                                                      | Boraginaceae      | Acc      | Acc  | Acc  | Acc  | Acc  | Acc  | Acc | 14       |   |   |   | 1 | 1 | 1 | 1 |                | P      |            |            |
| <i>Arrhenatherum calderae</i> A.Hansen                                                                               | Poaceae           | Acc      | Acc  | Acc  | Acc  | Acc  | Acc  | Acc | 0        |   | 1 |   | 1 |   |   |   | A              | S      |            |            |
| <i>Arrhenatherum elatius</i> (L.) P.Beauv. ex J.Presl & C.Presl. subsp. <i>bulbosum</i> (Willd.) Schübl. & G.Martens | Poaceae           | Acc      | Acc  | Acc  | Acc  | Acc  | Acc  | Acc | 8        | 1 | 1 |   | 1 | 1 |   | 1 |                | P      |            |            |
| <i>Artemisia ramosa</i> C.Sm. ex Link                                                                                | Asteraceae        | Acc      | Acc  | Acc  | Acc  | Acc  | Acc  | Acc | 1        |   |   |   | 1 | 1 |   |   | A              | S      |            |            |

| Species Name                                                                             | Family         | Atlantis | Muer | POWO | WFO | COL | GBIF | TRY | POWO Syn | H | P | G | T | C | F | L | Endemic Status | Native | Non native | Ornam Crop |
|------------------------------------------------------------------------------------------|----------------|----------|------|------|-----|-----|------|-----|----------|---|---|---|---|---|---|---|----------------|--------|------------|------------|
| <i>Artemisia reptans</i> C.Sm. ex Link                                                   | Asteraceae     | Acc      | Acc  | Acc  | Acc | Acc | Acc  | Acc | 0        |   |   |   | 1 | 1 | 1 |   |                | S      |            |            |
| <i>Artemisia thuscula</i> Cav.                                                           | Asteraceae     | Acc      | Acc  | Acc  | Acc | Acc | Acc  | Acc | 3        | 1 | 1 | 1 | 1 | 1 |   |   | A              | S      |            |            |
| <i>Arthrocaulon macrostachyum</i> (Moric.) Piirainen & G.Kadereit                        | Chenopodiaceae | Syn      | Syn  | Acc  | NL  | Acc | Acc  | NL  | 9        |   |   |   | 1 | 1 | 1 | 1 |                | S      |            |            |
| <i>Arum italicum</i> Mill. subsp. <i>canariense</i> (Webb & Berthel.) P.C.Boyce          | Araceae        | Acc      | Acc  | Acc  | Acc | Acc | Acc  | NL  | 1        | 1 | 1 | 1 | 1 | 1 | 1 |   |                | P      |            |            |
| <i>Arundo donax</i> L.                                                                   | Poaceae        | Acc      | Acc  | Acc  | Acc | Acc | Acc  | Acc | 25       | 1 | 1 | 1 | 1 | 1 | 1 | 1 |                |        | I          | O          |
| <i>Asclepias curassavica</i> L.                                                          | Asclepiadaceae | Acc      | Acc  | Acc  | Acc | Acc | Acc  | Acc | 8        |   | 1 | 1 | 1 | 1 | 1 | 1 |                |        | S          | O          |
| <i>Asparagus aethiopicus</i> L.                                                          | Asparagaceae   | Acc      | Acc  | Acc  | Acc | Acc | Acc  | Acc | 5        |   |   |   | 1 | 1 |   |   |                |        | P          |            |
| <i>Asparagus albus</i> L.                                                                | Asparagaceae   | NL       | NL   | Acc  | Acc | Acc | Acc  | Acc | 2        |   |   |   | 1 | 1 | 1 | 1 |                |        | S          |            |
| <i>Asparagus arborescens</i> Willd. ex Schult. & Schult.f.                               | Asparagaceae   | Acc      | Acc  | Acc  | Acc | Acc | Acc  | Acc | 3        | 1 | 1 | 1 | 1 | 1 | 1 | 1 | A              | S      |            |            |
| <i>Asparagus asparagoides</i> (L.) Druce                                                 | Asparagaceae   | Acc      | Acc  | Acc  | Acc | Acc | Acc  | Acc | 12       | 1 | 1 | 1 | 1 | 1 |   | 1 |                |        | P          | O          |
| <i>Asparagus fallax</i> Svent.                                                           | Asparagaceae   | Acc      | Acc  | Acc  | Acc | Acc | Acc  | Acc | 0        |   |   | 1 | 1 |   |   |   | A              | S      |            |            |
| <i>Asparagus horridus</i> L.                                                             | Asparagaceae   | Acc      | Acc  | Acc  | Acc | Acc | Acc  | Acc | 1        |   |   |   |   |   | 1 | 1 |                | S      |            |            |
| <i>Asparagus nesiotis</i> Svent. subsp. <i>nesiotis</i>                                  | Asparagaceae   | NL       | NL   | Acc  | Syn | Acc | Acc  | Syn | 0        |   |   |   |   |   | 1 | 1 | A              | S      |            |            |
| <i>Asparagus nesiotis</i> Svent. subsp. <i>purpurei</i> ensis<br>Marrero Rodr. & A.Ramos | Asparagaceae   | Acc      | Acc  | Acc  | NL  | Acc | Acc  | NL  | 0        |   |   |   |   |   | 1 | 1 | A              | S      |            |            |
| <i>Asparagus pastorianus</i> Webb & Berthel.                                             | Asparagaceae   | Acc      | Acc  | Acc  | Acc | Acc | Acc  | Acc | 1        |   |   |   | 1 | 1 | 1 | 1 |                | S      |            |            |
| <i>Asparagus plocamoides</i> Webb ex Svent.                                              | Asparagaceae   | Acc      | Acc  | Acc  | Acc | Acc | Acc  | Acc | 0        |   | 1 | 1 | 1 | 1 |   |   | A              | S      |            |            |
| <i>Asparagus scoparius</i> Lowe                                                          | Asparagaceae   | Acc      | Acc  | Acc  | Acc | Acc | Acc  | Acc | 1        | 1 | 1 | 1 | 1 | 1 | 1 |   |                | S      |            |            |
| <i>Asparagus setaceus</i> (Kunth) Jessop                                                 | Asparagaceae   | Acc      | Acc  | Acc  | Acc | Acc | Acc  | Acc | 6        |   | 1 |   | 1 | 1 |   |   |                |        | S          |            |
| <i>Asparagus umbellatus</i> Link subsp. <i>umbellatus</i>                                | Asparagaceae   | Acc      | Acc  | Acc  | Syn | Acc | Acc  | Syn | 5        | 1 | 1 | 1 | 1 | 1 | 1 |   | A              | S      |            |            |
| <i>Asperula gemella</i> Airy Shaw & Turrill                                              | Rubiaceae      | Syn      | NL   | Acc  | Acc | Acc | Acc  | Acc | 2        | 1 |   |   |   |   | 1 |   |                | P      |            |            |
| <i>Asphodelus aestivus</i> Brot.                                                         | Asphodelaceae  | NL       | NL   | Acc  | Acc | Acc | Acc  | Acc | 0        | 1 | 1 | 1 | 1 | 1 | 1 |   |                |        | P          |            |
| <i>Asphodelus ayardii</i> Jahand. & Maire                                                | Asphodelaceae  | Acc      | Acc  | Acc  | Acc | Acc | Acc  | Acc | 3        |   |   |   |   | 1 |   |   |                | P      |            |            |
| <i>Asphodelus fistulosus</i> L.                                                          | Asphodelaceae  | Acc      | Acc  | Acc  | Acc | Acc | Acc  | Acc | 3        | 1 | 1 | 1 | 1 | 1 | 1 | 1 |                | P      |            |            |

| Species Name                                                                                           | Family        | Atlantis | Muer | POWO | WFO  | COL | GBIF | TRY | POWO Syn | H | P | G | T | C | F | L | Endemic Status | Native | Non native | Ornam Crop |
|--------------------------------------------------------------------------------------------------------|---------------|----------|------|------|------|-----|------|-----|----------|---|---|---|---|---|---|---|----------------|--------|------------|------------|
| <i>Asphodelus ramosus</i> L. subsp. <i>ramosus</i>                                                     | Asphodelaceae | Acc      | Acc  | Acc  | Syn  | Acc | Acc  | Syn | 18       | 1 | 1 | 1 | 1 | 1 | 1 | 1 |                | P      |            |            |
| <i>Asphodelus ramosus</i> L. subsp. <i>distalis</i> Z. Díaz & Valdés                                   | Asphodelaceae | Acc      | Acc  | Acc  | NL   | Acc | Acc  | NL  | 0        | 1 | 1 | 1 | 1 | 1 | 1 | 1 |                | P      |            |            |
| <i>Asphodelus tenuifolius</i> Cav.                                                                     | Asphodelaceae | Acc      | Acc  | Acc  | Acc  | Acc | Acc  | Acc | 10       | 1 | 1 | 1 | 1 | 1 | 1 | 1 |                | P      |            |            |
| <i>Asplenium adiantum-nigrum</i> L.                                                                    | Aspleniaceae  | Acc      | Acc  | Acc  | Acc  | Acc | Acc  | Acc | 2        | 1 | 1 | 1 | 1 | 1 | 1 |   |                | S      |            |            |
| <i>Asplenium aethiopicum</i> (Burm. f.) Bech. subsp. <i>dodecaploideum</i> A.F.Braithw.                | Aspleniaceae  | Syn      | Syn  | Acc  | NL   | Acc | Acc  | NL  | 3        | 1 | 1 | 1 | 1 | 1 |   |   |                | S      |            |            |
| <i>Asplenium aethiopicum</i> (Burm. f.) Bech. subsp. <i>filare</i> (Forssk.) A.F. Braithw.             | Aspleniaceae  | Syn      | NL   | Acc  | Acc  | Acc | Acc  | NL  | 5        | 1 | 1 |   | 1 |   |   |   |                | S      |            |            |
| <i>Asplenium anceps</i> Lowe ex Hook. & Grev.                                                          | Aspleniaceae  | Acc      | Acc  | Acc  | AmUn | Acc | Acc  | Acc | 0        | 1 | 1 | 1 | 1 |   |   |   |                | S      |            |            |
| <i>Asplenium aureum</i> Cav.                                                                           | Aspleniaceae  | Acc      | Acc  | Acc  | Syn  | Acc | Acc  | Syn | 5        | 1 | 1 | 1 | 1 | 1 | 1 | 1 |                | S      |            |            |
| <i>Asplenium hemionitis</i> L.                                                                         | Aspleniaceae  | Acc      | Acc  | Acc  | Acc  | Acc | Acc  | Acc | 8        | 1 | 1 | 1 | 1 | 1 | 1 | 1 |                | S      |            |            |
| <i>Asplenium monanthes</i> L.                                                                          | Aspleniaceae  | Acc      | Acc  | Acc  | Acc  | Acc | Acc  | Acc | 2        |   | 1 |   |   |   |   |   |                | P      |            |            |
| <i>Asplenium obovatum</i> Viv. subsp. <i>billotii</i> (F. W. Schultz) O. Bolòs, Vigo, Masalles & Ninot | Aspleniaceae  | Acc      | Syn  | Acc  | AmUn | Acc | Acc  | Syn | 8        | 1 |   |   |   | 1 |   |   |                | S      |            |            |
| <i>Asplenium onopteris</i> L.                                                                          | Aspleniaceae  | Acc      | Acc  | Acc  | Acc  | Acc | Acc  | Acc | 3        | 1 | 1 | 1 | 1 | 1 | 1 | 1 |                | S      |            |            |
| <i>Asplenium scolopendrium</i> L.                                                                      | Aspleniaceae  | NL       | Acc  | Acc  | Acc  | Acc | Acc  | Acc | 3        |   |   |   | 1 | 1 |   |   |                |        | S          |            |
| <i>Asplenium septentrionale</i> (L.) Hoffm.                                                            | Aspleniaceae  | Acc      | Acc  | Acc  | Acc  | Acc | Acc  | Acc | 8        |   | 1 |   | 1 |   |   |   |                | S      |            |            |
| <i>Asplenium sulcatum</i> Lam.                                                                         | Aspleniaceae  | Syn      | Syn  | Acc  | Acc  | Acc | Acc  | Acc | 1        | 1 | 1 | 1 | 1 | 1 | 1 | 1 |                | S      |            |            |
| <i>Asplenium terorense</i> G.Kunkel                                                                    | Aspleniaceae  | Acc      | Acc  | Acc  | AmUn | Acc | Acc  | NL  | 0        |   |   |   |   | 1 |   |   | C              | S      |            |            |
| <i>Asplenium trichomanes</i> L. subsp. <i>maderense</i> Gibby & Lovis                                  | Aspleniaceae  | Acc      | Acc  | Acc  | AmUn | Acc | Acc  | NL  | 0        |   | 1 |   |   |   |   |   |                | P      |            |            |
| <i>Asplenium trichomanes</i> L. subsp. <i>quadrivalens</i> D.E.Mey.                                    | Aspleniaceae  | Acc      | Syn  | Acc  | NL   | Acc | Acc  | Acc | 2        | 1 | 1 | 1 | 1 | 1 |   |   |                | S      |            |            |
| <i>Asteriscus aquaticus</i> (L.) Less.                                                                 | Asteraceae    | Acc      | Acc  | Acc  | Acc  | Acc | Acc  | Acc | 13       |   | 1 | 1 | 1 | 1 |   |   |                | P      |            |            |
| <i>Asteriscus graveolens</i> (Forssk.) Less. subsp. <i>odorus</i> (Schousb.) Greuter                   | Asteraceae    | Acc      | Acc  | Acc  | Acc  | Acc | Acc  | NL  | 8        |   |   |   |   | 1 |   |   |                | S      |            |            |

| Species Name                                                                                                          | Family          | Atlantis | Muer | POWO | WFO | COL  | GBIF | TRY | POWO Syn | H | P | G | T | C | F | L | Endemic Status | Native | Non native | Ornam Crop |
|-----------------------------------------------------------------------------------------------------------------------|-----------------|----------|------|------|-----|------|------|-----|----------|---|---|---|---|---|---|---|----------------|--------|------------|------------|
| <i>Asteriscus graveolens</i> (Forssk.) Less. subsp. <i>stenophyllus</i> (Link) Greuter                                | Asteraceae      | Acc      | Acc  | Acc  | Acc | Acc  | Acc  | Acc | 8        |   |   |   |   | 1 |   |   | C              | S      |            |            |
| <i>Asteriscus intermedius</i> (DC.) Pit. & Proust                                                                     | Asteraceae      | Acc      | Acc  | Acc  | Acc | Acc  | Acc  | Acc | 4        |   |   |   |   |   |   | 1 | L              | S      |            |            |
| <i>Asteriscus schultzei</i> (Bolle) Pit. & Proust                                                                     | Asteraceae      | Acc      | Acc  | Acc  | Acc | Acc  | Acc  | Acc | 5        |   |   |   |   |   | 1 | 1 |                | S      |            |            |
| <i>Asteriscus sericeus</i> (L.f.) DC.                                                                                 | Asteraceae      | Acc      | Acc  | Acc  | Acc | Acc  | Acc  | Acc | 3        | 1 |   |   | 1 | 1 | 1 |   | A              | S      |            |            |
| <i>Astragalus boeticus</i> L.                                                                                         | Fabaceae        | Acc      | Acc  | Acc  | Acc | Acc  | Acc  | Acc | 3        | 1 |   |   | 1 | 1 |   | 1 |                | P      |            |            |
| <i>Astragalus edulis</i> Durand ex Bunge                                                                              | Fabaceae        | Acc      | Acc  | Acc  | Acc | Acc  | Acc  | Acc | 1        |   |   |   |   |   | 1 | 1 |                | P      |            |            |
| <i>Astragalus hamosus</i> L.                                                                                          | Fabaceae        | Acc      | Acc  | Acc  | Acc | Acc  | Acc  | Acc | 24       | 1 | 1 | 1 | 1 | 1 | 1 | 1 |                | S      |            |            |
| <i>Astragalus sinaicus</i> Boiss.                                                                                     | Fabaceae        | Acc      | Acc  | Acc  | Acc | Acc  | Acc  | Acc | 1        |   |   |   |   |   | 1 | 1 |                | P      |            |            |
| <i>Astragalus solandri</i> Lowe                                                                                       | Fabaceae        | Acc      | Acc  | Acc  | Acc | Acc  | Acc  | NL  | 4        |   |   | 1 | 1 | 1 | 1 | 1 |                | P      |            |            |
| <i>Astragalus stella</i> L.                                                                                           | Fabaceae        | Acc      | Acc  | Acc  | Acc | Acc  | Acc  | Acc | 10       |   |   |   |   |   | 1 | 1 |                | P      |            |            |
| <i>Astydamia latifolia</i> (L.f.) Baill.                                                                              | Apiaceae        | Acc      | Acc  | Acc  | Acc | Acc  | Acc  | Acc | 9        | 1 | 1 | 1 | 1 | 1 | 1 | 1 |                | S      |            |            |
| <i>Athamanta cervariifolia</i> (DC.) DC.                                                                              | Apiaceae        | Acc      | Syn  | Acc  | Acc | Acc  | Acc  | Syn | 2        | 1 | 1 | 1 | 1 |   |   |   | A              | S      |            |            |
| <i>Athamanta montana</i> (Webb ex Christ) Spalik & Wojew. & S.R.Downie                                                | Apiaceae        | Acc      | Syn  | Acc  | Acc | Acc  | Acc  | Acc | 2        | 1 | 1 | 1 | 1 | 1 |   |   | A              | S      |            |            |
| <i>Athyrium filix-femina</i> (L.) Roth                                                                                | Athyriaceae     | Acc      | Acc  | Acc  | Acc | Acc  | Acc  | Acc | 12       | 1 | 1 | 1 | 1 | 1 |   |   |                | S      |            |            |
| <i>Atocion armeria</i> (L.) Raf.                                                                                      | Caryophyllaceae | NL       | NL   | Acc  | Syn | Syn  | Acc  | Syn | 18       |   | 1 |   |   |   |   |   |                | S      |            |            |
| <i>Atractylis arbuscula</i> Svent & Michaelis subsp. <i>arbuscula</i>                                                 | Asteraceae      | NL       | Acc  | Acc  | Syn | Acc  | Acc  | NL  | 0        |   |   |   |   |   |   | 1 | L              | S      |            |            |
| <i>Atractylis arbuscula</i> Svent & Michaelis subsp. <i>schizogynophylla</i> (Svent. & Kahne) Marrero Rodr. & Caujapé | Asteraceae      | NL       | Acc  | Acc  | Syn | Acc  | Acc  | NL  | 1        |   |   |   |   | 1 |   |   | C              | S      |            |            |
| <i>Atractylis cancellata</i> L.                                                                                       | Asteraceae      | Acc      | Acc  | Acc  | Acc | Acc  | Acc  | Acc | 9        |   | 1 | 1 | 1 | 1 | 1 | 1 |                | P      |            |            |
| <i>Atractylis preauxiana</i> Sch.Bip.                                                                                 | Asteraceae      | Acc      | Acc  | Acc  | Acc | Acc  | Acc  | Acc | 1        |   |   |   | 1 | 1 |   |   | A              | S      |            |            |
| <i>Atriplex glauca</i> L. subsp. <i>ifniensis</i> (Caball.) Rivas Mart. & al.                                         | Chenopodiaceae  | Acc      | Acc  | Acc  | Acc | AmUn | Acc  | NL  | 1        | 1 |   | 1 | 1 | 1 | 1 | 1 |                | P      |            |            |
| <i>Atriplex halimus</i> L.                                                                                            | Chenopodiaceae  | Acc      | Acc  | Acc  | Acc | Acc  | Acc  | Acc | 7        |   |   |   | 1 | 1 | 1 | 1 |                | P      |            |            |

| Species Name                                                                                            | Family         | Atlantis | Muer | POWO | WFO | COL  | GBIF | TRY | POWO Syn | H | P | G | T | C | F | L | Endemic Status | Native | Non native | Ornam Crop |
|---------------------------------------------------------------------------------------------------------|----------------|----------|------|------|-----|------|------|-----|----------|---|---|---|---|---|---|---|----------------|--------|------------|------------|
| <i>Atriplex lindleyi</i> Moq.                                                                           | Chenopodiaceae | Acc      | Acc  | Acc  | Acc | Acc  | Acc  | Acc | 3        |   |   |   |   |   |   | 1 |                |        | S          |            |
| <i>Atriplex nummularia</i> Lindl.                                                                       | Chenopodiaceae | Acc      | Acc  | Acc  | Acc | Acc  | Acc  | Acc | 6        |   |   |   | 1 | 1 | 1 |   |                |        | S          |            |
| <i>Atriplex portulacoides</i> L.                                                                        | Chenopodiaceae | Syn      | Acc  | Acc  | Acc | Acc  | Acc  | Acc | 7        |   |   |   |   | 1 |   | 1 |                |        | S          |            |
| <i>Atriplex prostrata</i> Boucher ex DC.                                                                | Chenopodiaceae | Acc      | Acc  | Acc  | Acc | Acc  | Acc  | Acc | 43       |   |   |   | 1 |   |   | 1 |                |        | S          |            |
| <i>Atriplex semibaccata</i> R.Br.                                                                       | Chenopodiaceae | Acc      | Acc  | Acc  | Acc | Acc  | Acc  | Acc | 13       | 1 | 1 | 1 | 1 | 1 | 1 | 1 |                |        | I          |            |
| <i>Atriplex semilunaris</i> Aellen                                                                      | Chenopodiaceae | Acc      | Acc  | Acc  | Acc | Acc  | Acc  | Acc | 2        |   |   |   |   |   | 1 | 1 |                |        | I          |            |
| <i>Atriplex suberecta</i> Verd.                                                                         | Chenopodiaceae | Acc      | Acc  | Acc  | Acc | Acc  | Acc  | Acc | 1        |   |   |   |   | 1 | 1 | 1 |                |        | S          |            |
| <i>Austrocyllindropuntia cylindrica</i> (Lam.) Backeb.                                                  | Cactaceae      | Acc      | Acc  | Acc  | Acc | Acc  | Acc  | Acc | 8        |   | 1 |   | 1 | 1 | 1 | 1 |                |        | S          | O          |
| <i>Austrocyllindropuntia subulata</i> (Muehlenpf.) Backeb. subsp. <i>exaltata</i> (A. Berger) D.R. Hunt | Cactaceae      | Acc      | NL   | Acc  | Acc | Acc  | Acc  | NL  | 4        |   | 1 | 1 | 1 | 1 | 1 | 1 |                |        | S          | O          |
| <i>Avellinia festucoides</i> (Link) Valdés & H.Scholz                                                   | Poaceae        | Acc      | Acc  | Acc  | Syn | Acc  | Acc  | Syn | 23       |   |   | 1 |   | 1 |   |   |                |        | I          |            |
| <i>Avena barbata</i> Pott ex Link subsp. <i>barbata</i>                                                 | Poaceae        | NL       | NL   | NL   | Syn | AmUn | Acc  | Syn |          | 1 | 1 | 1 | 1 | 1 | 1 | 1 |                | P      |            |            |
| <i>Avena byzantina</i> K.Koch                                                                           | Poaceae        | Acc      | Acc  | Acc  | Acc | Acc  | Acc  | Acc | 1        |   | 1 |   |   |   |   |   |                | P      |            |            |
| <i>Avena canariensis</i> B.R.Baum, Rajhathy & D.R.Sampson                                               | Poaceae        | Acc      | Acc  | Acc  | Syn | Acc  | Acc  | Syn | 0        |   |   |   | 1 |   | 1 | 1 | A              | S      |            |            |
| <i>Avena longiglumis</i> Durieu                                                                         | Poaceae        | Acc      | NL   | Acc  | Acc | Acc  | Acc  | Acc | 1        |   |   |   | 1 |   |   |   |                |        | P          |            |
| <i>Avena sativa</i> L. subsp. <i>sativa</i>                                                             | Poaceae        | Acc      | NL   | NL   | Syn | AmUn | Acc  | Syn |          |   |   |   | 1 | 1 | 1 | 1 |                |        | P          | C          |
| <i>Avena sterilis</i> L. subsp. <i>sterilis</i>                                                         | Poaceae        | Acc      | NL   | Acc  | Syn | Acc  | Acc  | Syn | 7        |   | 1 | 1 | 1 | 1 | 1 | 1 |                | P      |            |            |
| <i>Avena sterilis</i> L. subsp. <i>atherantha</i> (C. Presl) H. Scholz                                  | Poaceae        | Acc      | NL   | NL   | Acc | AmUn | Syn  | Syn |          | 1 |   |   |   | 1 |   | 1 |                | P      |            |            |
| <i>Avena sterilis</i> L. subsp. <i>ludoviciana</i> (Durieu) Gillet & Magne                              | Poaceae        | Acc      | Syn  | Acc  | Acc | Acc  | Acc  | Acc | 5        |   | 1 |   |   |   | 1 | 1 |                | P      |            |            |
| <i>Avena strigosa</i> Schreb.                                                                           | Poaceae        | Acc      | Acc  | Acc  | Acc | Acc  | Acc  | Acc | 12       |   | 1 |   | 1 |   |   |   |                |        | P          |            |
| <i>Azolla filiculoides</i> Lam.                                                                         | Salviniaceae   | Acc      | Acc  | Acc  | Acc | Acc  | Acc  | Acc | 0        |   | 1 |   | 1 | 1 |   |   |                |        | I          | O          |
| <i>Balanites aegyptiaca</i> (L.) Delile                                                                 | Zygophyllaceae | Acc      | NL   | Acc  | Acc | Acc  | Acc  | Acc | 2        |   |   |   | 1 |   |   |   |                |        | S          | O          |
| <i>Ballota nigra</i> L.                                                                                 | Lamiaceae      | Acc      | NL   | Acc  | Acc | Acc  | Acc  | Acc | 4        | 1 |   |   |   |   |   |   |                |        | S          |            |

| Species Name                                         | Family          | Atlantis | Muer | POWO | WFO  | COL | GBIF | TRY | POWO Syn | H | P | G | T | C | F | L | Endemic Status | Native | Non native | Ornam Crop |
|------------------------------------------------------|-----------------|----------|------|------|------|-----|------|-----|----------|---|---|---|---|---|---|---|----------------|--------|------------|------------|
| <i>Bambusa vulgaris</i> Schrad. ex J.C. Wendl.       | Poaceae         | Acc      | Acc  | Acc  | Acc  | Acc | Acc  | Acc | 25       |   |   |   |   | 1 |   |   |                |        | S          | O          |
| <i>Barbarea verna</i> (Mill.) Asch.                  | Brassicaceae    | Acc      | Acc  | Acc  | Acc  | Acc | Acc  | Acc | 11       |   | 1 | 1 | 1 |   |   |   |                |        | P          |            |
| <i>Bassia hyssopifolia</i> (Pall.) Kuntze            | Amaranthaceae   | Acc      | Acc  | Acc  | Acc  | Acc | Acc  | Acc | 15       |   |   |   | 1 | 1 | 1 |   |                |        | P          |            |
| <i>Bassia scoparia</i> (L.) A.J.Scott                | Amaranthaceae   | Acc      | Acc  | Acc  | Acc  | Acc | Acc  | Acc | 39       |   |   |   | 1 | 1 | 1 | 1 |                |        | S          | O          |
| <i>Bassia tomentosa</i> (Lowe) Maire & Weiller       | Amaranthaceae   | Acc      | Acc  | Acc  | Acc  | Syn | Syn  | Acc | 7        | 1 | 1 | 1 | 1 | 1 | 1 | 1 |                | S      |            |            |
| <i>Begonia subvillosa</i> Klotzsch                   | Begoniaceae     | Syn      | NL   | Acc  | Acc  | Acc | Acc  | Acc | 6        |   | 1 |   |   |   |   |   |                |        | S          | O          |
| <i>Bellardia trixago</i> (L.) All.                   | Orobanchaceae   | Acc      | Acc  | Acc  | AmUn | Acc | Acc  | Acc | 25       | 1 | 1 |   | 1 | 1 |   |   |                |        | P          |            |
| <i>Bellis annua</i> L.                               | Asteraceae      | Acc      | Acc  | Acc  | Acc  | Acc | Acc  | Acc | 1        |   |   |   | 1 |   |   |   |                | S      |            |            |
| <i>Bellis perennis</i> L.                            | Asteraceae      | Acc      | NL   | Acc  | Acc  | Acc | Acc  | Acc | 14       |   | 1 |   | 1 |   |   |   |                |        | P          |            |
| <i>Bencomia brachystachya</i> Svent.                 | Rosaceae        | Acc      | Acc  | Acc  | AmUn | Acc | Acc  | NL  | 0        |   |   |   |   | 1 |   |   | C              | S      |            |            |
| <i>Bencomia caudata</i> (Aiton) Webb & Berthel.      | Rosaceae        | Acc      | Acc  | Acc  | AmUn | Acc | Acc  | Acc | 1        |   | 1 |   | 1 | 1 |   |   | A              | S      |            |            |
| <i>Bencomia exstipulata</i> Svent.                   | Rosaceae        | Acc      | Acc  | Acc  | AmUn | Acc | Acc  | Acc | 0        |   | 1 |   | 1 |   |   |   | A              | S      |            |            |
| <i>Bencomia sphaerocarpa</i> Svent.                  | Rosaceae        | Acc      | Acc  | Acc  | AmUn | Acc | Acc  | Acc | 0        | 1 |   |   |   |   |   |   | H              | S      |            |            |
| <i>Beta macrocarpa</i> Guss.                         | Caryophyllaceae | Acc      | Acc  | Acc  | Acc  | Acc | Acc  | Acc | 1        |   | 1 |   | 1 | 1 | 1 | 1 |                | P      |            |            |
| <i>Beta vulgaris</i> L.                              | Caryophyllaceae | Acc      | Acc  | Acc  | Acc  | Acc | Acc  | Acc | 46       | 1 | 1 | 1 | 1 | 1 | 1 | 1 |                | P      |            | C          |
| <i>Bethencourtia hermosae</i> (Pit.) G.Kunkel        | Asteraceae      | Acc      | Acc  | Acc  | AmUn | Acc | Acc  | NL  | 2        |   |   | 1 |   |   |   |   | G              | S      |            |            |
| <i>Bethencourtia palmensis</i> (Nees) Choisy ex Link | Asteraceae      | Acc      | Acc  | Acc  | AmUn | Acc | Acc  | Acc | 3        |   | 1 |   | 1 |   |   |   | A              | S      |            |            |
| <i>Bethencourtia rupicola</i> (B.Nord.) B.Nord       | Asteraceae      | Acc      | NL   | Acc  | Acc  | Acc | Acc  | NL  | 1        |   |   | 1 |   |   |   |   |                | S      |            |            |
| <i>Biancaea decapetala</i> (Roth) O.Deg.             | Fabaceae        | Syn      | NL   | Acc  | Syn  | NL  | Syn  | NL  | 14       |   |   |   |   | 1 |   |   |                |        | S          | O          |
| <i>Bidens aurea</i> (Aiton) Sherff                   | Asteraceae      | Acc      | Acc  | Acc  | Acc  | Acc | Acc  | Acc | 39       | 1 | 1 | 1 | 1 | 1 | 1 |   |                |        | I          |            |
| <i>Bidens pilosa</i> L.                              | Asteraceae      | Acc      | Acc  | Acc  | Acc  | Acc | Acc  | Acc | 73       | 1 | 1 | 1 | 1 | 1 | 1 | 1 |                |        | S          |            |
| <i>Bifora testiculata</i> (L.) Roth                  | Apiaceae        | Acc      | Acc  | Acc  | Acc  | Acc | Acc  | Acc | 10       |   |   |   |   | 1 |   |   |                |        | P          |            |
| <i>Biscutella auriculata</i> L.                      | Brassicaceae    | Acc      | Acc  | Acc  | Acc  | Acc | Acc  | Acc | 11       |   | 1 |   | 1 |   | 1 | 1 |                | P      |            |            |
| <i>Biserrula pelecinus</i> L.                        | Fabaceae        | Syn      | Acc  | Acc  | Syn  | Syn | Syn  | NL  | 6        | 1 | 1 | 1 | 1 | 1 | 1 | 1 |                | P      |            |            |

| Species Name                                                    | Family        | Atlantis | Muer | POWO | WFO  | COL  | GBIF | TRY | POWO Syn | H | P | G | T | C | F | L | Endemic Status | Native | Non native | Ornam Crop |
|-----------------------------------------------------------------|---------------|----------|------|------|------|------|------|-----|----------|---|---|---|---|---|---|---|----------------|--------|------------|------------|
| <i>Bituminaria bituminosa</i> (L.) C.H.Stirt.                   | Fabaceae      | Acc      | Acc  | Acc  | Acc  | Acc  | Acc  | Acc | 22       | 1 | 1 | 1 | 1 | 1 | 1 | 1 |                | P      |            |            |
| <i>Blackstonia imperfoliata</i> (L.f.) Samp.                    | Gentianaceae  | Acc      | Acc  | Acc  | Acc  | Acc  | Acc  | Acc | 9        |   |   |   |   | 1 |   |   |                |        | P          |            |
| <i>Blechnum spicant</i> (L.) Sm.                                | Blechnaceae   | Syn      | Acc  | Acc  | Acc  | Syn  | Acc  | Acc | 35       |   |   | 1 | 1 |   |   |   |                | S      |            |            |
| <i>Bolboschoenus glaucus</i> (Lam.) S.G.Sm.                     | Cyperaceae    | Acc      | NL   | Acc  | Acc  | Acc  | Acc  | Acc | 8        |   |   |   | 1 |   |   |   |                |        | S          |            |
| <i>Bolboschoenus maritimus</i> (L.) Palla                       | Cyperaceae    | Acc      | Acc  | Acc  | Acc  | Acc  | Acc  | Acc | 3        |   |   |   | 1 |   | 1 |   |                | P      |            |            |
| <i>Borago officinalis</i> L.                                    | Boraginaceae  | Acc      | Acc  | Acc  | Acc  | Acc  | Acc  | Acc | 3        | 1 | 1 | 1 | 1 | 1 | 1 | 1 |                |        | S          | C          |
| <i>Bosea yervamora</i> L.                                       | Amaranthaceae | Acc      | Acc  | Acc  | Acc  | AmUn | Syn  | Acc | 3        | 1 | 1 | 1 | 1 | 1 | 1 |   | A              | S      |            |            |
| <i>Bothriochloa insculpta</i> (Hochst. ex A. Rich.) & A. Camus  | Poaceae       | Acc      | NL   | Acc  | Acc  | Acc  | Acc  | Acc | 5        |   |   |   | 1 | 1 |   |   |                | P      |            |            |
| <i>Bothriochloa ischaemum</i> (L.) Keng                         | Poaceae       | Acc      | NL   | Acc  | Acc  | Acc  | Acc  | Acc | 16       |   |   |   |   | 1 |   |   |                | P      |            |            |
| <i>Bothriochloa pertusa</i> (L.) A. Camus                       | Poaceae       | Acc      | Acc  | Acc  | Acc  | Acc  | Acc  | Acc | 9        |   |   |   | 1 | 1 |   |   |                | P      |            |            |
| <i>Brachypodium arbuscula</i> (Gay ex St.-Yves) Gay ex St.-Yves | Poaceae       | Acc      | Acc  | Acc  | Acc  | Acc  | Acc  | Acc | 0        | 1 |   | 1 | 1 |   |   |   | A              | S      |            |            |
| <i>Brachypodium distachyon</i> (L.) P.Beauv.                    | Poaceae       | Acc      | Acc  | Acc  | Acc  | Acc  | Acc  | Acc | 53       | 1 | 1 | 1 | 1 | 1 | 1 | 1 |                | P      |            |            |
| <i>Brachypodium glaucovirens</i> (Murb.) Sagorski               | Poaceae       | Acc      | Acc  | Acc  | Syn  | Acc  | Acc  | NL  | 1        |   | 1 |   |   |   |   |   |                |        | S          |            |
| <i>Brachypodium phoenicoides</i> (L.) Roem. & Schult.           | Poaceae       | Acc      | Acc  | Acc  | Acc  | Acc  | Acc  | Acc | 13       |   |   |   |   |   | 1 |   |                |        | P          |            |
| <i>Brachypodium sylvaticum</i> (Huds.) P.Beauv.                 | Poaceae       | Acc      | Acc  | Acc  | Acc  | Acc  | Acc  | Acc | 4        | 1 | 1 | 1 | 1 | 1 |   |   |                | P      |            |            |
| <i>Brassica bourgeau</i> (Webb ex Christ) Kuntze                | Brassicaceae  | Acc      | Acc  | Acc  | AmUn | Acc  | Acc  | Acc | 0        | 1 | 1 | 1 | 1 |   | 1 |   | A              | S      |            |            |
| <i>Brassica napus</i> L.                                        | Brassicaceae  | Acc      | NL   | Acc  | Acc  | Acc  | Acc  | Acc | 28       |   |   |   |   | 1 |   |   |                |        | P          | C          |
| <i>Brassica nigra</i> (L.) K.Koch                               | Brassicaceae  | Acc      | Acc  | Acc  | Acc  | Acc  | Acc  | Acc | 24       |   |   | 1 | 1 |   |   | 1 |                |        | P          | C          |
| <i>Brassica oleracea</i> L.                                     | Brassicaceae  | Acc      | Acc  | Acc  | Acc  | Acc  | Acc  | Acc | 45       | 1 | 1 | 1 | 1 | 1 | 1 | 1 |                |        | S          | C          |
| <i>Briza maxima</i> L.                                          | Poaceae       | Acc      | Acc  | Acc  | Acc  | Acc  | Acc  | Acc | 14       | 1 | 1 | 1 | 1 | 1 | 1 | 1 |                | P      |            |            |
| <i>Briza media</i> L.                                           | Poaceae       | Acc      | Acc  | Acc  | Acc  | Acc  | Acc  | Acc | 13       |   |   |   | 1 | 1 |   |   |                | P      |            |            |
| <i>Briza minor</i> L.                                           | Poaceae       | Acc      | Acc  | Acc  | Acc  | Acc  | Acc  | Acc | 7        | 1 | 1 | 1 | 1 | 1 |   |   |                | P      |            |            |
| <i>Bromus catharticus</i> Vahl.                                 | Poaceae       | Acc      | Acc  | Acc  | Acc  | Acc  | Acc  | Acc | 44       | 1 | 1 | 1 | 1 | 1 | 1 | 1 |                |        | S          |            |

| Species Name                                                                                    | Family          | Atlantis | Muer | POWO | WFO | COL | GBIF | TRY | POWO Syn | H | P | G | T | C | F | L | Endemic Status | Native | Non native | Ornam Crop |
|-------------------------------------------------------------------------------------------------|-----------------|----------|------|------|-----|-----|------|-----|----------|---|---|---|---|---|---|---|----------------|--------|------------|------------|
| <i>Bromus commutatus</i> Schrad.                                                                | Poaceae         | Acc      | NL   | Acc  | Acc | Acc | Acc  | Acc | 4        |   | 1 |   |   |   |   |   |                |        | P          |            |
| <i>Bromus diandrus</i> Roth.                                                                    | Poaceae         | Acc      | Acc  | Acc  | Acc | Acc | Acc  | Acc | 15       | 1 | 1 | 1 | 1 | 1 | 1 | 1 |                | P      |            |            |
| <i>Bromus hordeaceus</i> L. subsp. <i>hordeaceus</i>                                            | Poaceae         | Acc      | Syn  | Acc  | Syn | Acc | Acc  | NL  | 36       | 1 | 1 | 1 | 1 | 1 | 1 | 1 |                | P      |            |            |
| <i>Bromus lanceolatus</i> Roth.                                                                 | Poaceae         | Acc      | Acc  | Acc  | Acc | Acc | Acc  | Acc | 18       | 1 | 1 | 1 | 1 | 1 | 1 | 1 |                | P      |            |            |
| <i>Bromus lepidus</i> Holmb.                                                                    | Poaceae         | Acc      | Acc  | Acc  | Acc | Acc | Acc  | Acc | 6        |   |   |   |   | 1 |   |   |                |        | P          |            |
| <i>Bromus madritensis</i> L.                                                                    | Poaceae         | Acc      | Acc  | Acc  | Acc | Acc | Acc  | Acc | 31       | 1 | 1 | 1 | 1 | 1 | 1 | 1 |                | P      |            |            |
| <i>Bromus rigidus</i> Roth.                                                                     | Poaceae         | Acc      | Acc  | Acc  | Acc | Acc | Acc  | Acc | 21       | 1 | 1 | 1 | 1 | 1 | 1 | 1 |                | P      |            |            |
| <i>Bromus rubens</i> L. subsp. <i>kunkelii</i> (H.Scholz) H.Scholz                              | Poaceae         | Acc      | Syn  | Acc  | Acc | Acc | Acc  | NL  | 3        | 1 | 1 | 1 | 1 | 1 | 1 | 1 | A              | P      |            |            |
| <i>Bromus secalinus</i> L.                                                                      | Poaceae         | Syn      | NL   | Acc  | Acc | Acc | Acc  | Acc | 23       |   | 1 |   |   |   |   |   |                |        | P          |            |
| <i>Bromus squarrosus</i> L.                                                                     | Poaceae         | Acc      | Acc  | Acc  | Acc | Acc | Acc  | Acc | 16       |   |   |   |   |   | 1 |   |                | P      |            |            |
| <i>Bromus sterilis</i> L.                                                                       | Poaceae         | Acc      | Acc  | Acc  | Acc | Acc | Acc  | Acc | 23       |   | 1 |   | 1 |   |   |   |                |        | P          |            |
| <i>Bromus tectorum</i> L.                                                                       | Poaceae         | Acc      | Acc  | Acc  | Acc | Acc | Acc  | Acc | 23       |   | 1 |   | 1 | 1 |   |   |                | P      |            |            |
| <i>Bryonia verrucosa</i> Aiton                                                                  | Cucurbitaceae   | Acc      | Acc  | Acc  | Acc | Acc | Acc  | Acc | 1        | 1 | 1 | 1 | 1 | 1 |   | 1 | A              | S      |            |            |
| <i>Bufonia paniculata</i> Dubois subsp. <i>teneriffae</i> Kunkel                                | Caryophyllaceae | NL       | Syn  | Acc  | Acc | Acc | Syn  | NL  | 1        |   | 1 | 1 | 1 | 1 |   |   | A              | S      |            |            |
| <i>Buglossoides arvensis</i> (L.) I.M.Johnst.                                                   | Boraginaceae    | Acc      | Acc  | Acc  | Acc | Acc | Acc  | Acc | 12       |   |   |   | 1 | 1 | 1 | 1 |                | P      |            |            |
| <i>Bupleurum handiense</i> (Bolle) G.Kunkel                                                     | Apiaceae        | Acc      | Acc  | Acc  | Acc | Acc | Acc  | Acc | 0        |   |   |   |   |   | 1 | 1 | A              | S      |            |            |
| <i>Bupleurum lancifolium</i> Hornem.                                                            | Apiaceae        | Acc      | Acc  | Acc  | Acc | Acc | Acc  | Acc | 3        |   |   |   | 1 | 1 |   |   |                |        | P          |            |
| <i>Bupleurum salicifolium</i> R.Br. subsp. <i>salicifolium</i>                                  | Apiaceae        | Acc      | Acc  | NL   | NL  | Acc | Acc  | NL  |          | 1 |   | 1 | 1 |   |   |   |                | S      |            |            |
| <i>Bupleurum salicifolium</i> R.Br. subsp. <i>aciphyllum</i> (Webb & Berthel.) Sunding & Kunkel | Apiaceae        | Acc      | Acc  | Acc  | Acc | Acc | Acc  | NL  | 1        | 1 | 1 | 1 | 1 | 1 |   |   | A              | S      |            |            |
| <i>Bupleurum semicompositum</i> L.                                                              | Apiaceae        | Acc      | Acc  | Acc  | Acc | Acc | Acc  | Acc | 7        | 1 |   | 1 | 1 | 1 | 1 | 1 |                | S      |            |            |
| <i>Bystropogon canariensis</i> (L.) L'Hér.                                                      | Lamiaceae       | Acc      | Acc  | Acc  | Acc | Acc | Acc  | Acc | 5        | 1 | 1 | 1 | 1 | 1 |   |   | A              | S      |            |            |
| <i>Bystropogon odoratissimus</i> Bolle                                                          | Lamiaceae       | Acc      | Acc  | Acc  | Acc | Acc | Acc  | NL  | 0        |   |   |   | 1 |   |   |   | T              | S      |            |            |
| <i>Bystropogon origanifolius</i> L'Hér. var. <i>origanifolius</i>                               | Lamiaceae       | NL       | Acc  | Acc  | Syn | Acc | Acc  | NL  | 0        |   |   | 1 | 1 |   |   |   | A              | S      |            |            |



| Species Name                                                                               | Family           | Atlantis | Muer | POWO | WFO | COL | GBIF | TRY | POWO Syn | H | P | G | T | C | F | L | Endemic Status | Native | Non native | Ornam Crop |
|--------------------------------------------------------------------------------------------|------------------|----------|------|------|-----|-----|------|-----|----------|---|---|---|---|---|---|---|----------------|--------|------------|------------|
| <i>Bystropogon origanifolius</i> L'Hér. var. <i>canariae</i> La Serna                      | Lamiaceae        | NL       | Acc  | Acc  | NL  | Acc | Acc  | NL  | 0        |   |   |   |   | 1 |   |   | C              | S      |            |            |
| <i>Bystropogon origanifolius</i> L'Hér. var. <i>ferrensii</i> (Ceballos & Ortuño) La Serna | Lamiaceae        | NL       | Acc  | Acc  | Acc | Acc | Acc  | NL  | 0        | 1 |   |   |   |   |   |   | H              | S      |            |            |
| <i>Bystropogon origanifolius</i> L'Hér. var. <i>palmensis</i> Bornm.                       | Lamiaceae        | NL       | Acc  | Acc  | NL  | Acc | Acc  | NL  | 0        |   | 1 |   |   |   |   |   | P              | S      |            |            |
| <i>Bystropogon plumosus</i> (L.f.) L'Hér.                                                  | Lamiaceae        | Acc      | Acc  | Acc  | Acc | Acc | Acc  | NL  | 1        |   |   |   | 1 |   |   |   | T              | S      |            |            |
| <i>Bystropogon wildpretii</i> La Serna                                                     | Lamiaceae        | Acc      | Acc  | Acc  | Acc | Acc | Acc  | Acc | 0        |   | 1 |   |   |   |   |   | P              | S      |            |            |
| <i>Cakile maritima</i> Scop.                                                               | Brassicaceae     | Acc      | Acc  | Acc  | Acc | Acc | Acc  | Acc | 24       |   |   |   | 1 | 1 | 1 | 1 |                | P      |            |            |
| <i>Calamagrostis arenaria</i> (L.) Roth                                                    | Poaceae          | Acc      | Syn  | Acc  | Syn | Syn | Syn  | NL  | 8        |   |   |   |   |   | 1 |   |                | P      |            |            |
| <i>Calceolaria tripartita</i> Ruiz & Pav.                                                  | Calceolariaceae  | Acc      | Acc  | Acc  | Acc | Acc | Acc  | Acc | 30       |   | 1 |   | 1 |   |   |   |                |        | S          | O          |
| <i>Calendula arvensis</i> M.Bieb.                                                          | Asteraceae       | Syn      | Syn  | Acc  | Acc | Acc | Acc  | Acc | 28       | 1 | 1 | 1 | 1 | 1 | 1 | 1 |                |        | S          |            |
| <i>Calendula officinalis</i> L.                                                            | Asteraceae       | Acc      | Acc  | Acc  | Acc | Acc | Acc  | Acc | 11       | 1 | 1 | 1 | 1 | 1 |   |   |                |        | S          | C          |
| <i>Calendula stellata</i> Cav.                                                             | Asteraceae       | Acc      | Acc  | Acc  | Acc | Acc | Acc  | Acc | 10       |   |   |   |   | 1 | 1 |   |                |        | S          |            |
| <i>Calendula suffruticosa</i> Vahl                                                         | Asteraceae       | Acc      | Acc  | Acc  | Acc | Acc | Acc  | Acc | 0        |   |   |   | 1 |   |   |   |                | P      |            |            |
| <i>Calendula tripterocarpa</i> Rupr.                                                       | Asteraceae       | Acc      | Acc  | Acc  | Acc | Acc | Acc  | Acc | 2        |   |   |   | 1 | 1 | 1 | 1 |                | P      |            |            |
| <i>Callitriche stagnalis</i> Scop.                                                         | Plantaginaceae   | Acc      | Acc  | Acc  | Acc | Acc | Acc  | Acc | 6        |   |   | 1 | 1 | 1 |   |   |                | P      |            |            |
| <i>Calotropis procera</i> (Aiton) Dryand.                                                  | Apocynaceae      | Acc      | Acc  | Acc  | Acc | Acc | Acc  | Acc | 13       |   |   |   |   | 1 | 1 |   |                |        | I          |            |
| <i>Calystegia soldanella</i> (L.) R.Br.                                                    | Convolvulaceae   | Acc      | Acc  | Acc  | Acc | Acc | Acc  | Acc | 12       |   |   |   |   |   |   | 1 |                | P      |            |            |
| <i>Camelina microcarpa</i> Andr. ex DC.                                                    | Brassicaceae     | NL       | NL   | Acc  | Acc | Acc | Acc  | Acc | 14       |   |   |   |   | 1 |   |   |                |        | P          |            |
| <i>Campanula dichotoma</i> L.                                                              | Campanulaceae    | Acc      | Acc  | Acc  | Acc | Acc | Acc  | Acc | 3        |   |   | 1 | 1 |   | 1 | 1 |                | S      |            |            |
| <i>Campanula erinus</i> L.                                                                 | Campanulaceae    | Acc      | Acc  | Acc  | Acc | Acc | Acc  | Acc | 6        | 1 | 1 | 1 | 1 | 1 | 1 | 1 |                | P      |            |            |
| <i>Camptoloma canariense</i> (Webb & Berthel.) Hilliard                                    | Scrophulariaceae | Acc      | Acc  | Acc  | Acc | Acc | Acc  | Acc | 3        |   |   |   |   | 1 |   |   | C              | S      |            |            |
| <i>Campylanthus salsoloides</i> (L.f.) Roth                                                | Plantaginaceae   | Acc      | Acc  | Acc  | Acc | Acc | Acc  | Acc | 1        |   | 1 | 1 | 1 | 1 | 1 | 1 | A              | S      |            |            |
| <i>Canaria tortuosa</i> (Webb & Berthel.) Jim.Mejías & P.Vargas                            | Apiaceae         | Acc      | Syn  | Acc  | NL  | Acc | Acc  | NL  | 5        | 1 | 1 | 1 | 1 | 1 |   |   | A              | S      |            |            |

| Species Name                                                                     | Family        | Atlantis | Muer | POWO | WFO  | COL | GBIF | TRY | POWO Syn | H | P | G | T | C | F | L | Endemic Status | Native | Non native | Ornam Crop |
|----------------------------------------------------------------------------------|---------------|----------|------|------|------|-----|------|-----|----------|---|---|---|---|---|---|---|----------------|--------|------------|------------|
| <i>Canarina canariensis</i> (L.) Vatke                                           | Campanulaceae | Acc      | Acc  | Acc  | Acc  | Acc | Acc  | Acc | 5        | 1 | 1 | 1 | 1 | 1 |   |   | A              | S      |            |            |
| <i>Canna glauca</i> L.                                                           | Cannaceae     | NL       | NL   | Acc  | Acc  | Acc | Acc  | Acc | 18       |   | 1 |   |   |   |   |   |                |        | S          | O          |
| <i>Canna indica</i> L.                                                           | Cannaceae     | Acc      | Acc  | Acc  | Acc  | Acc | Acc  | Acc | 116      |   | 1 | 1 | 1 | 1 |   |   |                |        | S          | O          |
| <i>Capparis spinosa</i> L.                                                       | Capparaceae   | Acc      | Acc  | Acc  | Acc  | Acc | Acc  | Acc | 6        | 1 |   |   |   |   |   |   |                |        | S          | C          |
| <i>Capsella bursa-pastoris</i> (L.) Medik.                                       | Brassicaceae  | Acc      | Acc  | Acc  | Acc  | Acc | Acc  | Acc | 237      | 1 | 1 | 1 | 1 | 1 | 1 | 1 |                | P      |            |            |
| <i>Capsella rubella</i> Reut.                                                    | Brassicaceae  | Acc      | Acc  | Acc  | Acc  | Acc | Acc  | Acc | 7        | 1 | 1 | 1 |   |   |   |   |                | P      |            |            |
| <i>Capsicum annuum</i> L.                                                        | Solanaceae    | NL       | NL   | Acc  | Acc  | Acc | Acc  | Acc | 80       | 1 | 1 | 1 | 1 | 1 | 1 | 1 |                | S      |            | C          |
| <i>Cardamine flexuosa</i> With subsp. <i>debilis</i>                             | Brassicaceae  | NL       | NL   | Acc  | Acc  | Acc | Acc  | NL  | 13       |   |   |   |   | 1 |   |   |                | P      |            |            |
| <i>Cardamine hirsuta</i> L.                                                      | Brassicaceae  | Acc      | Acc  | Acc  | Acc  | Acc | Acc  | Acc | 25       | 1 | 1 | 1 | 1 | 1 |   |   |                | P      |            |            |
| <i>Cardiospermum grandiflorum</i> Sw.                                            | Sapindaceae   | Acc      | Acc  | Acc  | Acc  | Acc | Acc  | Acc | 11       |   | 1 | 1 | 1 | 1 |   |   |                |        | I          | O          |
| <i>Cardiospermum halicacabum</i> L.                                              | Sapindaceae   | NL       | NL   | Acc  | Acc  | Acc | Acc  | Acc | 9        |   |   |   | 1 | 1 |   |   |                |        | S          | O          |
| <i>Carduus baeocephalus</i> Webb subsp. <i>baeocephalus</i>                      | Asteraceae    | Acc      | Acc  | Acc  | Syn  | Acc | Acc  | Syn | 1        |   |   |   |   | 1 |   |   | C              | S      |            |            |
| <i>Carduus baeocephalus</i> Webb subsp. <i>microstigma</i> Gaisberg & Wagenitz   | Asteraceae    | Acc      | Acc  | Acc  | NL   | Acc | Acc  | NL  | 0        | 1 |   |   |   | 1 |   |   | A              | S      |            |            |
| <i>Carduus bourgaei</i> Kazmi                                                    | Asteraceae    | Acc      | Acc  | Acc  | Acc  | Acc | Acc  | NL  | 1        |   |   |   |   |   | 1 |   | F              | S      |            |            |
| <i>Carduus clavulatus</i> Link                                                   | Asteraceae    | Acc      | Acc  | Acc  | Acc  | Acc | Acc  | Acc | 2        | 1 | 1 | 1 | 1 | 1 | 1 | 1 | A              | S      |            |            |
| <i>Carduus pycnocephalus</i> L.                                                  | Asteraceae    | Acc      | Acc  | Acc  | Acc  | Acc | Acc  | Acc | 0        |   | 1 | 1 | 1 | 1 | 1 |   |                | P      |            |            |
| <i>Carduus tenuiflorus</i> Curtis                                                | Asteraceae    | Acc      | Acc  | Acc  | Acc  | Acc | Acc  | Acc | 2        | 1 | 1 | 1 | 1 | 1 | 1 | 1 |                | P      |            |            |
| <i>Carduus volutarioides</i> Reyes-Bet.                                          | Asteraceae    | Acc      | Acc  | Acc  | AmUn | Acc | Acc  | NL  | 0        |   |   |   | 1 |   |   |   | T              | S      |            |            |
| <i>Carex canariensis</i> Kük.                                                    | Cyperaceae    | Acc      | Acc  | Acc  | Acc  | Acc | Acc  | Acc | 1        | 1 | 1 | 1 | 1 | 1 |   |   | A              | S      |            |            |
| <i>Carex demissa</i> Hornem. subsp. <i>cedercreutzii</i> (Fagerstr.) Jac.Koopman | Cyperaceae    | Acc      | Acc  | Acc  | Syn  | Acc | Acc  | NL  | 1        |   |   |   | 1 |   |   |   |                | P      |            |            |
| <i>Carex distachya</i> Desf.                                                     | Cyperaceae    | Acc      | Acc  | Acc  | Acc  | Acc | Acc  | Acc | 0        |   |   | 1 |   | 1 |   |   |                | P      |            |            |
| <i>Carex distans</i> L.                                                          | Cyperaceae    | Acc      | NL   | Acc  | Acc  | Acc | Acc  | Acc | 1        |   |   | 1 |   | 1 |   |   |                | P      |            |            |
| <i>Carex divisa</i> Huds.                                                        | Cyperaceae    | Acc      | Acc  | Acc  | Acc  | Acc | Acc  | Acc | 34       | 1 |   |   |   |   |   |   |                | P      |            |            |

| Species Name                                                                  | Family        | Atlantis | Muer | POWO | WFO  | COL  | GBIF | TRY | POWO Syn | H | P | G | T | C | F | L | Endemic Status | Native | Non native | Ornam Crop |
|-------------------------------------------------------------------------------|---------------|----------|------|------|------|------|------|-----|----------|---|---|---|---|---|---|---|----------------|--------|------------|------------|
| <i>Carex divulsa</i> Stokes subsp. <i>divulsa</i> (Stokes) Celak.             | Cyperaceae    | Acc      | NL   | Acc  | Syn  | Syn  | Acc  | Acc | 14       | 1 | 1 | 1 | 1 | 1 | 1 | 1 |                | P      |            |            |
| <i>Carex leersii</i> F.W. Schultz                                             | Cyperaceae    | NL       | Syn  | Acc  | Acc  | Acc  | Acc  | Acc | 10       |   |   | 1 | 1 | 1 |   |   |                | P      |            |            |
| <i>Carex otrubae</i> Podp.                                                    | Cyperaceae    | Acc      | Acc  | Acc  | Syn  | Acc  | Acc  | Syn | 8        |   |   | 1 | 1 | 1 |   |   |                | P      |            |            |
| <i>Carex pairae</i> F.W.Schultz                                               | Cyperaceae    | Syn      | Acc  | Acc  | Acc  | Acc  | Acc  | Acc | 3        |   |   | 1 | 1 | 1 |   |   |                | P      |            |            |
| <i>Carex paniculata</i> L. subsp. <i>calderae</i> (A. Hansen) Lewej. & Lobin  | Cyperaceae    | Acc      | Acc  | Acc  | Acc  | Acc  | Acc  | NL  | 1        |   |   |   | 1 |   |   |   | T              | S      |            |            |
| <i>Carex perraudieriana</i> (Kük. ex Bornm.) Gay ex Kük.                      | Cyperaceae    | Acc      | Acc  | Acc  | Acc  | Acc  | Acc  | Acc | 0        |   | 1 | 1 | 1 |   |   |   | A              | S      |            |            |
| <i>Carex pseudocyperus</i> L.                                                 | Cyperaceae    | Acc      | Acc  | Acc  | Acc  | Acc  | Acc  | Acc | 1        |   |   |   | 1 |   |   |   |                | P      |            |            |
| <i>Carica papaya</i> L.                                                       | Caricaceae    | NL       | NL   | Acc  | Acc  | Acc  | Acc  | Acc | 31       |   | 1 |   | 1 | 1 | 1 |   |                |        | S          | C          |
| <i>Carlina canariensis</i> Pit.                                               | Asteraceae    | Acc      | Acc  | Acc  | Acc  | Acc  | Acc  | Acc | 0        |   |   |   |   | 1 |   |   | C              | S      |            |            |
| <i>Carlina falcata</i> Svent.                                                 | Asteraceae    | Acc      | Acc  | Acc  | Syn  | Acc  | Acc  | Syn | 1        |   | 1 |   | 1 |   |   |   | A              | S      |            |            |
| <i>Carlina salicifolia</i> (L.f.) Cav. subsp. <i>salicifolia</i>              | Asteraceae    | NL       | Acc  | Acc  | Syn  | Acc  | Acc  | Syn | 4        | 1 |   | 1 | 1 | 1 |   |   | A              | S      |            |            |
| <i>Carlina salicifolia</i> (L.f.) Cav. subsp. <i>lancerottensis</i> G. Kunkel | Asteraceae    | NL       | Acc  | Acc  | AmUn | Acc  | Acc  | NL  | 1        |   |   |   |   |   | 1 | 1 | A              | S      |            |            |
| <i>Carlina salicifolia</i> (L.f.) Cav. subsp. <i>meuseli</i> nov subsp.       | Asteraceae    | NL       | NL   | NL   | NL   | AmUn | Acc  | NL  |          |   | 1 |   |   |   |   |   | P              | S      |            |            |
| <i>Carlina salicifolia</i> (L.f.) Cav. var. <i>gomerensis</i> G.Kunkel        | Asteraceae    | NL       | NL   | Acc  | NL   | Acc  | Acc  | NL  | 0        |   |   | 1 |   |   |   |   | G              | S      |            |            |
| <i>Carlina texedae</i> Marrero Rodr.                                          | Asteraceae    | Acc      | Acc  | Acc  | Syn  | Acc  | Acc  | Syn | 0        |   |   |   |   | 1 |   |   | C              | S      |            |            |
| <i>Carlina xeranthemoides</i> L.f.                                            | Asteraceae    | Acc      | Acc  | Acc  | Acc  | Acc  | Acc  | Acc | 1        |   |   |   | 1 |   |   |   | T              | S      |            |            |
| <i>Caroxylon tetrandrum</i> (Forssk.) Akhani & Roalson                        | Amaranthaceae | Acc      | Acc  | Acc  | Syn  | Acc  | Acc  | Syn | 5        |   |   |   |   |   | 1 | 1 |                | P      |            |            |
| <i>Caroxylon vermiculatum</i> (L.) Akhani & Roalson                           | Amaranthaceae | Acc      | Acc  | Acc  | Syn  | Syn  | Syn  | Syn | 15       |   |   |   | 1 | 1 | 1 | 1 |                | P      |            |            |
| <i>Carpobrotus acinaciformis</i> (L.) L.Bolus                                 | Aizoaceae     | Acc      | Acc  | Acc  | Acc  | Acc  | Acc  | Acc | 9        |   |   |   |   | 1 |   |   |                |        | I          | O          |
| <i>Carpobrotus edulis</i> (L.) N.E.Br.                                        | Aizoaceae     | Acc      | Acc  | Acc  | Acc  | Acc  | Acc  | Acc | 3        |   | 1 | 1 | 1 | 1 | 1 | 1 |                |        | I          | O          |
| <i>Carrichtera annua</i> (L.) DC.                                             | Brassicaceae  | Acc      | Acc  | Acc  | Acc  | Acc  | Acc  | Acc | 2        | 1 |   | 1 | 1 | 1 | 1 | 1 |                | P      |            |            |
| <i>Carthamus caeruleus</i> L.                                                 | Asteraceae    | Syn      | Syn  | Acc  | Acc  | Syn  | Syn  | Acc | 14       |   | 1 |   | 1 | 1 | 1 | 1 |                | P      |            |            |

| Species Name                                                                                 | Family        | Atlantis | Muer | POWO | WFO  | COL | GBIF | TRY | POWO Syn | H | P | G | T | C | F | L | Endemic Status | Native | Non native | Ornam Crop |
|----------------------------------------------------------------------------------------------|---------------|----------|------|------|------|-----|------|-----|----------|---|---|---|---|---|---|---|----------------|--------|------------|------------|
| <i>Carthamus lanatus</i> L.                                                                  | Asteraceae    | Acc      | Acc  | Acc  | Acc  | Acc | Acc  | Acc | 6        |   | 1 | 1 | 1 | 1 | 1 | 1 |                |        | P          |            |
| <i>Carthamus tinctorius</i> L.                                                               | Asteraceae    | Acc      | Acc  | Acc  | Acc  | Acc | Acc  | Acc | 5        |   | 1 |   | 1 | 1 | 1 |   |                |        | S          | C          |
| <i>Cascabela thevetia</i> (L.) Lippold                                                       | Apocynaceae   | NL       | Acc  | Acc  | Acc  | Acc | Acc  | Acc | 11       |   | 1 |   | 1 | 1 |   |   |                |        | S          | O          |
| <i>Castanea sativa</i> Mill.                                                                 | Fagaceae      | Acc      | Acc  | Acc  | Acc  | Acc | Acc  | Acc | 5        | 1 | 1 | 1 | 1 | 1 |   |   |                |        | I          | C          |
| <i>Castellia tuberculosa</i> (Moris) Bor                                                     | Poaceae       | Acc      | Acc  | Acc  | Acc  | Acc | Acc  | Acc | 6        |   | 1 | 1 | 1 | 1 | 1 | 1 |                | P      |            |            |
| <i>Casuarina cunninghamiana</i> Miq.                                                         | Casuarinaceae | Acc      | Acc  | Acc  | Acc  | Acc | Acc  | Acc | 0        |   | 1 |   | 1 |   |   |   |                |        | S          | O          |
| <i>Casuarina equisetifolia</i> L.                                                            | Casuarinaceae | Acc      | Acc  | Acc  | Acc  | Acc | Acc  | Acc | 1        |   |   |   | 1 | 1 | 1 |   |                |        | S          | O          |
| <i>Casuarina glauca</i> Sieber ex Spreng.                                                    | Casuarinaceae | Acc      | NL   | Acc  | Acc  | Acc | Acc  | Acc | 1        | 1 |   |   | 1 | 1 | 1 | 1 |                |        | S          | O          |
| <i>Catapodium marinum</i> (L.) C.E.Hubb.                                                     | Poaceae       | Acc      | Acc  | Acc  | Acc  | Acc | Acc  | Acc | 22       |   |   |   |   |   | 1 | 1 |                | P      |            |            |
| <i>Catapodium rigidum</i> (L.) C.E.Hubb. subsp. <i>rigidum</i>                               | Poaceae       | Acc      | Acc  | Acc  | Syn  | Acc | Acc  | Syn | 15       | 1 | 1 | 1 | 1 | 1 | 1 | 1 |                | P      |            |            |
| <i>Catapodium rigidum</i> (L.) C.E.Hubb. subsp. <i>hemipoa</i> (Delile ex Spreng.) Kerguelen | Poaceae       | Acc      | Acc  | Acc  | Acc  | Acc | Acc  | NL  | 9        |   |   |   |   |   |   | 1 |                | P      |            |            |
| <i>Catharanthus roseus</i> (L.) G. Don                                                       | Apocynaceae   | Acc      | Acc  | Acc  | Acc  | Acc | Acc  | Acc | 5        | 1 | 1 |   | 1 | 1 | 1 | 1 |                |        | S          | O          |
| <i>Cedronella canariensis</i> (L.) Webb & Berthel.                                           | Lamiaceae     | Acc      | Acc  | Acc  | Acc  | Acc | Acc  | Acc | 6        | 1 | 1 | 1 | 1 | 1 |   |   |                | S      |            |            |
| <i>Ceiba pentandra</i> (L.) Gaertn.                                                          | Malvaceae     | NL       | NL   | Acc  | Acc  | Acc | Acc  | Acc | 22       |   |   |   | 1 |   |   |   |                |        | S          | C          |
| <i>Celtis australis</i> L.                                                                   | Ulmaceae      | Acc      | Acc  | Acc  | Acc  | Acc | Acc  | Acc | 7        |   |   | 1 |   | 1 |   |   |                |        | S          | O          |
| <i>Cenchrus americanus</i> (L.) Morrone                                                      | Poaceae       | NL       | Syn  | Acc  | AmUn | Acc | Acc  | Syn | 58       |   | 1 |   | 1 | 1 |   |   |                |        | S          | O          |
| <i>Cenchrus ciliaris</i> L.                                                                  | Poaceae       | Acc      | Acc  | Acc  | Acc  | Acc | Acc  | Acc | 20       | 1 | 1 | 1 | 1 | 1 | 1 | 1 |                | P      |            | O          |
| <i>Cenchrus clandestinus</i> (Hochst. ex Chiov.) Morrone                                     | Poaceae       | Acc      | NL   | Acc  | NL   | Acc | Acc  | Syn | 3        |   | 1 | 1 | 1 | 1 | 1 |   |                |        | I          | O          |
| <i>Cenchrus divisus</i> (J.F.Gmel.) Verloove, Govaerts & Buttler                             | Poaceae       | NL       | NL   | Acc  | NL   | Acc | Acc  | NL  | 9        |   |   |   | 1 | 1 |   |   |                |        | S          | O          |
| <i>Cenchrus echinatus</i> L.                                                                 | Poaceae       | Acc      | NL   | Acc  | Acc  | Acc | Acc  | Acc | 10       |   |   |   |   | 1 |   |   |                |        | I          | O          |
| <i>Cenchrus geniculatus</i> Thunb.                                                           | Poaceae       | Acc      | NL   | Acc  | Syn  | Acc | Acc  | NL  | 12       |   | 1 |   | 1 |   |   |   |                |        | S          | O          |
| <i>Cenchrus longisetus</i> M.C. Johnst.                                                      | Poaceae       | Acc      | Syn  | Acc  | Syn  | Acc | Acc  | Syn | 3        |   | 1 |   | 1 | 1 |   |   |                |        | S          | O          |
| <i>Cenchrus orientalis</i> (Rich.) Morrone                                                   | Poaceae       | Acc      | NL   | Acc  | Syn  | Acc | Acc  | Syn | 12       |   | 1 |   | 1 | 1 |   |   |                |        | I          | O          |

| Species Name                                                                           | Family           | Atlantis | Muer | POWO | WFO  | COL | GBIF | TRY | POWO Syn | H | P | G | T | C | F | L | Endemic Status | Native | Non native | Ornam Crop |
|----------------------------------------------------------------------------------------|------------------|----------|------|------|------|-----|------|-----|----------|---|---|---|---|---|---|---|----------------|--------|------------|------------|
| <i>Cenchrus purpureus</i> (Schumach.) Morrone                                          | Poaceae          | Acc      | Syn  | Acc  | AmUn | Acc | Acc  | Syn | 13       |   | 1 | 1 | 1 | 1 |   | 1 |                |        | I          | O          |
| <i>Cenchrus setaceus</i> (Forssk.) Morrone                                             | Poaceae          | Acc      | Syn  | Acc  | AmUn | Acc | Acc  | Syn | 10       | 1 | 1 | 1 | 1 | 1 | 1 | 1 |                |        | I          | O          |
| <i>Centaurea aspera</i> L.                                                             | Asteraceae       | Acc      | Acc  | Acc  | Acc  | Acc | Acc  | Acc | 7        |   |   |   |   | 1 |   |   |                | P      |            |            |
| <i>Centaurea bimorpha</i> Viv.                                                         | Asteraceae       | Acc      | NL   | Acc  | Acc  | Acc | Acc  | NL  | 4        |   |   |   |   |   |   | 1 |                |        | S          |            |
| <i>Centaurea calcitrapa</i> L.                                                         | Asteraceae       | Acc      | Acc  | Acc  | Acc  | Acc | Acc  | Acc | 5        | 1 |   | 1 | 1 | 1 | 1 | 1 |                | P      |            |            |
| <i>Centaurea conocephala</i> Bolle                                                     | Asteraceae       | Acc      | NL   | Acc  | Acc  | Acc | Acc  | NL  | 0        |   |   |   | 1 |   |   |   | T              | S      |            |            |
| <i>Centaurea diluta</i> Aiton                                                          | Asteraceae       | Acc      | Acc  | Acc  | Acc  | Acc | Acc  | Acc | 0        |   |   | 1 | 1 |   |   | 1 |                |        | P          |            |
| <i>Centaurea eriophora</i> L.                                                          | Asteraceae       | Acc      | Acc  | Acc  | Acc  | Acc | Acc  | Acc | 6        |   |   |   |   |   | 1 |   |                |        | P          |            |
| <i>Centaurea gentilii</i> Braun-Blanq. & Maire                                         | Asteraceae       | Syn      | Acc  | Acc  | Syn  | Syn | Syn  | Syn | 3        |   |   |   |   | 1 |   |   |                | P      |            |            |
| <i>Centaurea melitensis</i> L.                                                         | Asteraceae       | Acc      | Acc  | Acc  | Acc  | Acc | Acc  | Acc | 15       | 1 | 1 | 1 | 1 | 1 | 1 | 1 |                | P      |            |            |
| <i>Centaurium erythraea</i> Rafn                                                       | Gentianaceae     | Acc      | Acc  | Acc  | Acc  | Acc | Acc  | Acc | 36       | 1 | 1 |   | 1 | 1 |   |   |                |        | P          |            |
| <i>Centaurium maritimum</i> (L.) Fritsch                                               | Gentianaceae     | Acc      | Acc  | Acc  | Acc  | Acc | Acc  | Acc | 16       |   |   |   |   | 1 |   |   |                |        | P          |            |
| <i>Centaurium pulchellum</i> (Sw.) Druce                                               | Gentianaceae     | NL       | NL   | Acc  | Acc  | Acc | Acc  | Acc | 49       |   | 1 | 1 | 1 | 1 |   | 1 |                |        | P          |            |
| <i>Centaurium tenuiflorum</i> (Hoffmanns. & Link) Fritsch<br>subsp. <i>tenuiflorum</i> | Gentianaceae     | Acc      | NL   | NL   | NL   | Acc | Acc  | NL  |          | 1 | 1 | 1 | 1 | 1 | 1 | 1 |                |        | P          |            |
| <i>Centratherum punctatum</i> Cass.                                                    | Asteraceae       | NL       | NL   | Acc  | Acc  | Acc | Acc  | Acc | 41       |   | 1 |   |   |   |   |   |                |        | S          |            |
| <i>Cerastium arvense</i> L.                                                            | Caryophyllaceae  | Acc      | Acc  | Acc  | Acc  | Acc | Acc  | Acc | 36       |   |   | 1 | 1 | 1 |   |   |                | P      |            |            |
| <i>Cerastium fontanum</i> Baumg.                                                       | Caryophyllaceae  | Acc      | NL   | Acc  | Acc  | Acc | Acc  | Acc | 8        |   | 1 |   | 1 | 1 |   |   |                | P      |            |            |
| <i>Cerastium glomeratum</i> Thuill.                                                    | Caryophyllaceae  | Acc      | Acc  | Acc  | Acc  | Acc | Acc  | Acc | 33       | 1 | 1 | 1 | 1 | 1 | 1 | 1 |                | P      |            |            |
| <i>Cerastium holosteoides</i> Fr.                                                      | Caryophyllaceae  | Syn      | Syn  | Acc  | Syn  | Acc | Acc  | Syn | 44       |   |   |   | 1 | 1 |   |   |                | P      |            |            |
| <i>Cerastium sventenii</i> Jalas                                                       | Caryophyllaceae  | Acc      | Acc  | Acc  | Acc  | Acc | Acc  | NL  | 0        | 1 | 1 |   | 1 |   |   |   | A              | S      |            |            |
| <i>Ceratocarpus heterocarpa</i> Durand                                                 | Papaveraceae     | Acc      | Acc  | Acc  | Acc  | Acc | Acc  | NL  | 2        |   |   |   |   |   | 1 |   |                | P      |            |            |
| <i>Ceratonis siliqua</i> L.                                                            | Fabaceae         | Acc      | Acc  | Acc  | Acc  | Acc | Acc  | Acc | 2        | 1 |   | 1 | 1 | 1 | 1 | 1 |                |        | P          | C          |
| <i>Ceratophyllum demersum</i> L.                                                       | Ceratophyllaceae | Acc      | Acc  | Acc  | Acc  | Acc | Acc  | Acc | 2        |   |   |   | 1 |   |   |   |                |        | S          |            |
| <i>Cereus hildmannianus</i> K.Schum.                                                   | Cacotaceae       | NL       | NL   | Acc  | Acc  | Acc | Acc  | Acc | 33       |   |   |   | 1 |   |   |   |                |        | S          | O          |

| Species Name                                                                             | Family          | Atlantis | Muer | POWO | WFO | COL  | GBIF | TRY | POWO Syn | H | P | G | T | C | F | L | Endemic Status | Native | Non native | Ornam Crop |
|------------------------------------------------------------------------------------------|-----------------|----------|------|------|-----|------|------|-----|----------|---|---|---|---|---|---|---|----------------|--------|------------|------------|
| <i>Ceropegia dichotoma</i> Haw. subsp. <i>dichotoma</i>                                  | Asclepiadaceae  | Acc      | Acc  | Acc  | NL  | Acc  | Acc  | NL  | 2        | 1 |   |   | 1 |   |   |   | A              | S      |            |            |
| <i>Ceropegia dichotoma</i> Haw. subsp. <i>krainzii</i> (Svent.) P.Bruyns                 | Asclepiadaceae  | Acc      | Acc  | Acc  | Acc | Acc  | Acc  | Acc | 3        |   |   | 1 |   |   |   |   | G              | S      |            |            |
| <i>Ceropegia fusca</i> Bolle                                                             | Asclepiadaceae  | Acc      | Acc  | Acc  | Acc | Acc  | Acc  | Acc | 1        |   |   |   | 1 | 1 |   |   | A              | S      |            |            |
| <i>Cestrum aurantiacum</i> Lindl.                                                        | Solanaceae      | Acc      | Acc  | Acc  | Acc | Acc  | Acc  | Acc | 14       |   | 1 | 1 | 1 | 1 |   |   |                |        | S          |            |
| <i>Cestrum parqui</i> (Lam.) L'Hér.                                                      | Solanaceae      | Acc      | Acc  | Acc  | Acc | Acc  | Acc  | Acc | 20       |   |   |   | 1 |   |   | 1 |                |        | I          |            |
| <i>Chaenorhinum minus</i> (L.) Lange                                                     | Plantaginaceae  | NL       | NL   | Acc  | Acc | Acc  | Acc  | Acc | 10       |   | 1 |   |   |   |   |   |                |        | S          |            |
| <i>Chaetonychchia cymosa</i> (L.) Sweet                                                  | Caryophyllaceae | Acc      | Acc  | Acc  | Acc | Acc  | Acc  | Acc | 8        |   |   |   |   | 1 |   |   |                |        | P          |            |
| <i>Chamaecrista fasciculata</i> (Michx.) Greene                                          | Fabaceae        | Acc      | Acc  | Acc  | Acc | Acc  | Acc  | Acc | 45       | 1 |   |   |   |   |   |   |                |        | S          | O          |
| <i>Chamaecytisus mollis</i> (Cav.) Greuter & Burdet                                      | Fabaceae        | Acc      | NL   | Acc  | Acc | AmUn | Syn  | NL  | 5        |   |   |   | 1 |   |   |   |                | P      |            |            |
| <i>Chamaecytisus prolifer</i> (L.f.) Link subsp. <i>prolifer</i>                         | Fabaceae        | Syn      | Syn  | NL   | NL  | NL   | Acc  | NL  |          |   |   | 1 | 1 |   |   |   | A              | S      |            |            |
| <i>Chamaecytisus prolifer</i> (L.f.) Link subsp. <i>angustifolius</i> (Kuntze) G. Kunkel | Fabaceae        | Syn      | Syn  | Acc  | NL  | NL   | Syn  | NL  | 0        |   |   | 1 | 1 |   |   |   | A              | S      |            |            |
| <i>Chamaecytisus prolifer</i> (L.f.) Link subsp. <i>meridionalis</i> Acebes              | Fabaceae        | Syn      | Syn  | Acc  | NL  | NL   | Syn  | NL  | 1        |   |   |   |   | 1 |   |   | C              | S      |            |            |
| <i>Chamaecytisus prolifer</i> (L.f.) Link subsp. <i>palmensis</i> H.Christ               | Fabaceae        | NL       | Syn  | Acc  | Acc | Syn  | Acc  | Acc | 3        |   | 1 |   |   |   |   |   | P              | S      |            |            |
| <i>Chamaemelum fuscatum</i> (Brot.) Vasc.                                                | Asteraceae      | Acc      | Acc  | Acc  | Acc | Acc  | Acc  | Acc | 9        |   |   |   | 1 |   |   |   |                |        | S          |            |
| <i>Chamaerops humilis</i> L.                                                             | Arecaeae        | NL       | NL   | Acc  | Acc | Acc  | Acc  | Acc | 1        |   | 1 |   | 1 | 1 |   |   |                |        | S          | O          |
| <i>Chasmanthe aethiopica</i> (L.) N.E.Br.                                                | Iridaceae       | Acc      | Acc  | Acc  | Acc | Acc  | Acc  | Acc | 11       |   | 1 | 1 | 1 | 1 |   |   |                |        | I          | O          |
| <i>Chasmanthe bicolor</i> (Gasp.) N. E. Br.                                              | Iridaceae       | Acc      | NL   | Acc  | Acc | Acc  | Acc  | Acc | 2        |   |   |   |   | 1 |   |   |                |        | S          | O          |
| <i>Chasmanthe floribunda</i> (Salisb.) N. E. Br.                                         | Iridaceae       | Acc      | NL   | Acc  | Acc | Acc  | Acc  | Acc | 2        |   | 1 |   |   | 1 |   |   |                |        | S          | O          |
| <i>Cheilanthes tirajanae</i> T.S. Velazquez                                              | Pteridaceae     | Acc      | Acc  | AmUn | NL  | Syn  | Syn  | NL  | 0        |   |   |   |   | 1 |   |   | C              | S      |            |            |
| <i>Cheirolophus anagaensis</i> Santos                                                    | Asteraceae      | NL       | NL   | NL   | NL  | AmUn | Acc  | NL  |          |   |   |   | 1 |   |   |   | T              | S      |            |            |
| <i>Cheirolophus arboreus</i> (Webb & Berthel.) Holub                                     | Asteraceae      | Acc      | Acc  | Acc  | Acc | Acc  | Acc  | Acc | 2        |   | 1 |   |   |   |   |   | P              | S      |            |            |
| <i>Cheirolophus arbutifolius</i> (Svent.) G.Kunkel                                       | Asteraceae      | Acc      | Acc  | Acc  | Acc | Acc  | Acc  | Acc | 1        |   |   |   |   | 1 |   |   | C              | S      |            |            |

| Species Name                                                                                  | Family        | Atlantis | Muer | POWO | WFO | COL  | GBIF | TRY | POWO Syn | H | P | G | T | C | F | L | Endemic Status | Native | Non native | Ornam Crop |
|-----------------------------------------------------------------------------------------------|---------------|----------|------|------|-----|------|------|-----|----------|---|---|---|---|---|---|---|----------------|--------|------------|------------|
| <i>Cheirolophus burchardii</i> Susanna                                                        | Asteraceae    | Syn      | Acc  | Acc  | Acc | Acc  | Acc  | NL  | 3        |   |   |   | 1 |   |   |   | T              | S      |            |            |
| <i>Cheirolophus canariensis</i> (Brouss. ex Willd.) Holub                                     | Asteraceae    | Acc      | Acc  | Acc  | Acc | Acc  | Acc  | Acc | 3        |   |   |   | 1 |   |   |   | T              | S      |            |            |
| <i>Cheirolophus dariasii</i> (Svent.) Bramwell                                                | Asteraceae    | Acc      | Acc  | Acc  | Acc | Acc  | Acc  | NL  | 2        |   |   | 1 |   |   |   |   | G              | S      |            |            |
| <i>Cheirolophus duranii</i> (Burchard) Holub                                                  | Asteraceae    | Acc      | Acc  | Acc  | Acc | Acc  | Acc  | NL  | 1        | 1 |   |   |   |   |   |   | H              | S      |            |            |
| <i>Cheirolophus falcisectus</i> Svent. ex Montelongo & Moraleda                               | Asteraceae    | Acc      | Acc  | Acc  | Acc | Acc  | Acc  | Acc | 0        |   |   |   |   | 1 |   |   | C              | S      |            |            |
| <i>Cheirolophus ghomerythus</i> (Svent.) Holub                                                | Asteraceae    | Acc      | Acc  | Acc  | Acc | Acc  | Acc  | NL  | 1        |   |   | 1 |   |   |   |   | G              | S      |            |            |
| <i>Cheirolophus junonianus</i> (Svent.) Holub subsp. <i>junonianus</i>                        | Asteraceae    | NL       | Syn  | NL   | Syn | AmUn | Syn  | NL  |          |   | 1 |   |   |   |   |   | P              | S      |            |            |
| <i>Cheirolophus junonianus</i> (Svent.) Holub subsp. <i>isoplexiphyllus</i> (Svent.) G.Kunkel | Asteraceae    | NL       | Syn  | Acc  | Syn | Acc  | Acc  | NL  | 0        |   | 1 |   |   |   |   |   | P              | S      |            |            |
| <i>Cheirolophus metlesicsii</i> Parada                                                        | Asteraceae    | Acc      | Acc  | Acc  | Acc | Acc  | Acc  | NL  | 0        |   |   |   | 1 |   |   |   | T              | S      |            |            |
| <i>Cheirolophus puntallanensis</i> A. Santos                                                  | Asteraceae    | NL       | Acc  | NL   | NL  | Acc  | Acc  | NL  |          |   | 1 |   |   |   |   |   | P              | S      |            |            |
| <i>Cheirolophus santos-abreui</i> A.Santos                                                    | Asteraceae    | Acc      | Acc  | Acc  | Acc | Acc  | Acc  | NL  | 0        |   | 1 |   |   |   |   |   | P              | S      |            |            |
| <i>Cheirolophus satarataensis</i> (Svent.) Holub                                              | Asteraceae    | Acc      | Acc  | Acc  | Acc | Acc  | Acc  | NL  | 1        |   |   | 1 |   |   |   |   | G              | S      |            |            |
| <i>Cheirolophus sventenii</i> (A.Santos) G.Kunkel subsp. <i>sventenii</i>                     | Asteraceae    | Acc      | Acc  | Acc  | Syn | Acc  | Acc  | NL  | 1        |   | 1 |   |   |   |   |   | P              | S      |            |            |
| <i>Cheirolophus sventenii</i> (A.Santos) G.Kunkel subsp. <i>gracilis</i> A. Santos            | Asteraceae    | Acc      | Acc  | Acc  | NL  | Acc  | Acc  | NL  | 0        |   | 1 |   |   |   |   |   | P              | S      |            |            |
| <i>Cheirolophus tagananensis</i> (Svent.) Holub                                               | Asteraceae    | Acc      | Acc  | Acc  | Acc | Acc  | Acc  | NL  | 1        |   |   |   | 1 |   |   |   | T              | S      |            |            |
| <i>Cheirolophus teydis</i> (C.Sm.) G.López                                                    | Asteraceae    | Acc      | Acc  | Acc  | Acc | Acc  | Acc  | Acc | 5        |   | 1 |   | 1 |   |   |   | A              | S      |            |            |
| <i>Cheirolophus webbianus</i> (Sch.Bip.) Holub                                                | Asteraceae    | Acc      | Acc  | Acc  | Acc | Acc  | Acc  | NL  | 2        |   |   |   | 1 |   |   |   | T              | S      |            |            |
| <i>Chelidonium majus</i> L.                                                                   | Papaveraceae  | Acc      | Acc  | Acc  | Acc | Acc  | Acc  | Acc | 12       | 1 |   |   | 1 | 1 |   |   |                | S      |            |            |
| <i>Chenopodium coronopus</i> (Moq.) S.Fuentes, Uotila & Borsch                                | Amaranthaceae | Acc      | Acc  | Acc  | Syn | Acc  | Acc  | Syn | 2        | 1 | 1 |   | 1 | 1 |   |   | A              | S      |            |            |
| <i>Chenopodium murale</i> (L.) S.Fuentes, Uotila & Borsch                                     | Amaranthaceae | Acc      | Acc  | Acc  | Syn | Acc  | Acc  | Acc | 19       | 1 | 1 | 1 | 1 | 1 | 1 | 1 |                | P      |            |            |
| <i>Chenopodium album</i> L.                                                                   | Amaranthaceae | Acc      | Acc  | Acc  | Acc | Acc  | Acc  | Acc | 88       | 1 | 1 | 1 | 1 | 1 | 1 | 1 |                | P      |            |            |

| Species Name                                                                               | Family        | Atlantis | Muer | POWO | WFO | COL  | GBIF | TRY | POWO Syn | H | P | G | T | C | F | L | Endemic Status | Native | Non native | Ornam Crop |
|--------------------------------------------------------------------------------------------|---------------|----------|------|------|-----|------|------|-----|----------|---|---|---|---|---|---|---|----------------|--------|------------|------------|
| <i>Chenopodium giganteum</i> D.Don                                                         | Amaranthaceae | Acc      | Acc  | Acc  | Acc | Acc  | Acc  | Acc | 10       |   |   |   | 1 | 1 | 1 |   |                |        | P          |            |
| <i>Chenopodium nutans</i> (R.Br.) S.Fuentes & Borsch                                       | Amaranthaceae | Acc      | Acc  | Acc  | Syn | Acc  | Acc  | Syn | 6        |   | 1 |   | 1 | 1 |   |   |                |        | I          |            |
| <i>Chenopodium opulifolium</i> Schrad. ex W.D.J.Koch & Ziz                                 | Amaranthaceae | NL       | NL   | Acc  | Acc | Acc  | Acc  | Acc | 5        |   | 1 |   |   |   |   |   |                |        | S          |            |
| <i>Chenopodium probstii</i> Aellen                                                         | Amaranthaceae | Acc      | NL   | Syn  | Syn | Acc  | Acc  | Syn |          |   | 1 |   | 1 |   |   |   |                |        | S          |            |
| <i>Chenopodium vulvaria</i> L.                                                             | Amaranthaceae | Acc      | Acc  | Acc  | Acc | Acc  | Acc  | Acc | 4        | 1 |   |   | 1 |   |   |   |                | P      |            |            |
| <i>Chloris barbata</i> Sw.                                                                 | Poaceae       | Acc      | NL   | Acc  | Acc | Acc  | Acc  | Acc | 4        |   |   |   | 1 |   |   |   |                |        | S          |            |
| <i>Chloris gayana</i> Kunth                                                                | Poaceae       | Acc      | Acc  | Acc  | Acc | Acc  | Acc  | Acc | 4        |   |   |   | 1 |   |   |   |                |        | P          |            |
| <i>Chloris pycnothrix</i> Trin.                                                            | Poaceae       | Acc      | NL   | Acc  | Acc | Acc  | Acc  | Acc | 10       |   | 1 |   |   |   |   |   |                |        | S          |            |
| <i>Chloris truncata</i> R.Br.                                                              | Poaceae       | Acc      | Acc  | Acc  | Acc | Acc  | Acc  | Acc | 3        |   |   |   | 1 |   |   |   |                |        | P          |            |
| <i>Chlorophytum comosum</i> (Thunb.) Jacques                                               | Asparagaceae  | Acc      | NL   | Acc  | Acc | Acc  | Acc  | Acc | 31       |   | 1 |   | 1 | 1 |   |   |                |        | S          | O          |
| <i>Chondrilla juncea</i> L.                                                                | Asteraceae    | Acc      | Acc  | Acc  | Acc | Acc  | Acc  | Acc | 18       |   |   |   | 1 |   |   |   |                |        | P          |            |
| <i>Chrysojasminum odoratissimum</i> (L.) Banfi                                             | Oleaceae      | Syn      | Syn  | Acc  | Syn | Acc  | Acc  | Syn | 5        | 1 | 1 | 1 | 1 | 1 | 1 |   |                | S      |            | O          |
| <i>Cicer arietinum</i> L.                                                                  | Fabaceae      | Acc      | Acc  | Acc  | Acc | Acc  | Acc  | Acc | 7        |   |   |   | 1 |   | 1 | 1 |                |        | S          |            |
| <i>Cicer canariense</i> A.Santos & G.P.Lewis                                               | Fabaceae      | Acc      | Acc  | Acc  | Acc | Acc  | Acc  | Acc | 0        |   | 1 |   | 1 |   |   |   | A              | S      |            |            |
| <i>Cichorium pumilum</i> Jacq.                                                             | Asteraceae    | Acc      | Acc  | Acc  | Acc | Acc  | Acc  | Acc | 13       | 1 | 1 | 1 | 1 | 1 | 1 | 1 |                |        | P          |            |
| <i>Cirsium vulgare</i> (Savi) Ten.                                                         | Asteraceae    | Acc      | Acc  | Acc  | Acc | Acc  | Acc  | Acc | 7        |   |   |   | 1 |   |   |   |                |        | S          |            |
| <i>Cistanche phelypaea</i> (L.) Cout.                                                      | Orobanchaceae | Acc      | Acc  | Acc  | Acc | AmUn | Acc  | Acc | 10       |   |   |   | 1 |   | 1 | 1 |                | P      |            |            |
| <i>Cistus asper</i> Demoly & R.Mesa                                                        | Cistaceae     | Acc      | Acc  | Acc  | Acc | Acc  | Acc  | NL  | 0        | 1 |   |   |   |   |   |   | H              | S      |            |            |
| <i>Cistus chinamadensis</i> Bañares & P.Romero subsp. <i>chinamadensis</i>                 | Cistaceae     | Acc      | Acc  | NL   | NL  | Acc  | Acc  | NL  |          |   |   |   | 1 |   |   |   | T              | S      |            |            |
| <i>Cistus chinamadensis</i> Bañares & P.Romero subsp. <i>gomeræ</i> A. Bañares & P. Romero | Cistaceae     | Acc      | Acc  | Acc  | NL  | Acc  | Acc  | NL  | 1        |   |   | 1 |   |   |   |   | G              | S      |            |            |
| <i>Cistus chinamadensis</i> Bañares & P.Romero subsp. <i>ombriosus</i> Demoly & M. Marrero | Cistaceae     | Acc      | Acc  | Acc  | NL  | Acc  | Acc  | NL  | 0        | 1 |   |   |   |   |   |   | H              | S      |            |            |
| <i>Cistus grancanariæ</i> Marrero Rodr., R.S.Almeida & C.Ríos                              | Cistaceae     | Acc      | Acc  | Acc  | Acc | Acc  | Acc  | NL  | 0        |   |   |   |   | 1 |   |   | C              | S      |            |            |



| Species Name                                                                                   | Family        | Atlantis | Muer | POWO | WFO | COL  | GBIF | TRY | POWO Syn | H | P | G | T | C | F | L | Endemic Status | Native | Non native | Ornam Crop |
|------------------------------------------------------------------------------------------------|---------------|----------|------|------|-----|------|------|-----|----------|---|---|---|---|---|---|---|----------------|--------|------------|------------|
| <i>Cistus horrens</i> Demoly                                                                   | Cistaceae     | Acc      | Acc  | Acc  | Acc | Acc  | Acc  | NL  | 0        |   |   |   |   | 1 |   |   | C              | S      |            |            |
| <i>Cistus ladanifer</i> L. subsp. <i>ladanifer</i>                                             | Cistaceae     | Acc      | NL   | NL   | NL  | Acc  | Acc  | NL  |          |   |   |   | 1 | 1 |   |   |                |        | S          |            |
| <i>Cistus monspeliensis</i> L. subsp. <i>monspeliensis</i>                                     | Cistaceae     | NL       | NL   | NL   | NL  | AmUn | Acc  | NL  |          | 1 | 1 | 1 | 1 | 1 |   |   |                | P      |            |            |
| <i>Cistus monspeliensis</i> L. subsp. <i>canariensis</i> Rivas-Mart., Martín-Osorio & Wildpret | Cistaceae     | Acc      | NL   | Syn  | NL  | AmUn | Acc  | NL  |          | 1 | 1 | 1 | 1 | 1 |   |   |                | P      |            |            |
| <i>Cistus ochreateus</i> C. Sm. ex Buch                                                        | Cistaceae     | Acc      | Syn  | Acc  | NL  | Syn  | Syn  | NL  | 0        |   |   |   |   | 1 |   |   | C              | S      |            |            |
| <i>Cistus osbeckiifolius</i> Webb ex Christ subsp. <i>osbeckiifolius</i>                       | Cistaceae     | Acc      | Acc  | NL   | NL  | Acc  | Acc  | NL  |          |   |   |   | 1 |   |   |   | T              | S      |            |            |
| <i>Cistus osbeckiifolius</i> Webb ex Christ subsp. <i>tomentosus</i> Bañares & Demoly          | Cistaceae     | Acc      | Acc  | Acc  | Syn | Acc  | Acc  | NL  | 0        |   |   |   | 1 |   |   |   | T              | S      |            |            |
| <i>Cistus palmensis</i> Bañares & Demoly                                                       | Cistaceae     | Acc      | Acc  | Acc  | Acc | Acc  | Acc  | NL  | 0        |   | 1 |   |   |   |   |   | P              | S      |            |            |
| <i>Cistus symphytifolius</i> Lam.                                                              | Cistaceae     | Acc      | Acc  | Acc  | Acc | Acc  | Acc  | Acc | 7        |   | 1 |   | 1 |   |   |   | A              | S      |            |            |
| <i>Citrullus colocynthis</i> (L.) Schrad.                                                      | Cucurbitaceae | Acc      | Acc  | Acc  | Acc | Acc  | Acc  | Acc | 10       |   | 1 |   | 1 | 1 | 1 | 1 |                | P      |            | C          |
| <i>Citrullus lanatus</i> (Thunb.) Matsum. & Nakai                                              | Cucurbitaceae | NL       | NL   | Acc  | Acc | Acc  | Acc  | Acc | 6        | 1 | 1 | 1 | 1 | 1 | 1 | 1 |                |        | S          | C          |
| <i>Cladanthus mixtus</i> (L.) Chevall.                                                         | Asteraceae    | Acc      | Acc  | Acc  | Acc | Acc  | Acc  | Acc | 15       | 1 | 1 | 1 | 1 | 1 |   |   |                | P      |            |            |
| <i>Cladium mariscus</i> (L.) Pohl subsp. <i>mariscus</i>                                       | Cyperaceae    | Acc      | NL   | Acc  | NL  | Acc  | Acc  | NL  | 25       |   |   |   |   | 1 |   |   |                | P      |            |            |
| <i>Cladium mariscus</i> (L.) Pohl subsp. <i>jamaicense</i> (Crantz) Kük.                       | Cyperaceae    | Acc      | Acc  | Acc  | Acc | Acc  | Acc  | Acc | 10       |   |   |   |   | 1 |   |   |                |        | P          |            |
| <i>Cleistocactus hyalacanthus</i> (K.Schum.) Rol.-Goss.                                        | Cactaceae     | NL       | NL   | Acc  | Acc | Syn  | Acc  | Acc | 12       |   |   |   | 1 |   |   |   |                | S      |            | O          |
| <i>Cleistocactus strausii</i> (Heese) Backeb.                                                  | Cactaceae     | NL       | NL   | Acc  | Acc | Syn  | Acc  | Acc | 8        |   |   |   | 1 |   |   |   |                | S      |            | O          |
| <i>Clinopodium menthifolium</i> (Host) Stace subsp. <i>ascendens</i> (Jord.) Govaerts          | Lamiaceae     | NL       | Syn  | Acc  | Acc | Acc  | Acc  | Acc | 11       | 1 | 1 | 1 | 1 | 1 |   |   |                | P      |            |            |
| <i>Clinopodium nepeta</i> (L.) Kuntze subsp. <i>nepeta</i>                                     | Lamiaceae     | Syn      | NL   | Acc  | Syn | Acc  | Acc  | Syn | 43       | 1 | 1 | 1 | 1 | 1 |   |   |                | P      |            | O          |
| <i>Cneorum pulverulentum</i> Vent                                                              | Rutaceae      | Syn      | Syn  | Acc  | Acc | Acc  | Acc  | Acc | 2        | 1 | 1 | 1 | 1 | 1 |   |   | A              | P      |            |            |
| <i>Coccoloba uvifera</i> (L.) L.                                                               | Polygonaceae  | Acc      | NL   | Acc  | Acc | Acc  | Acc  | Acc | 3        |   | 1 | 1 | 1 | 1 | 1 | 1 |                |        | S          | O          |
| <i>Codiaeum variegatum</i> (L.) Rumph. ex A.Juss.                                              | Euphorbiaceae | NL       | NL   | Acc  | Acc | Acc  | Acc  | Acc | 5        |   | 1 |   |   | 1 |   |   |                |        | S          | O          |
| <i>Coffea arabica</i> L.                                                                       | Rubiaceae     | Acc      | Acc  | Acc  | Acc | Acc  | Acc  | Acc | 6        |   |   |   |   | 1 |   |   |                |        | S          | C          |

| Species Name                                                                               | Family         | Atlantis | Muer | POWO | WFO  | COL  | GBIF | TRY | POWO Syn | H | P | G | T | C | F | L | Endemic Status | Native | Non native | Ornam Crop |
|--------------------------------------------------------------------------------------------|----------------|----------|------|------|------|------|------|-----|----------|---|---|---|---|---|---|---|----------------|--------|------------|------------|
| <i>Coix lacryma-jobi</i> L.                                                                | Poaceae        | Acc      | Acc  | Acc  | Acc  | Acc  | Acc  | Acc | 5        |   |   |   | 1 | 1 |   | 1 |                |        | P          | O          |
| <i>Colchicum hierrense</i> (A.Santos) J.C.Manning & Vinn.                                  | Liliaceae      | Syn      | Syn  | Acc  | Syn  | Syn  | Syn  | Syn | 3        | 1 | 1 | 1 |   |   |   |   | A              | S      |            |            |
| <i>Colchicum psammophilum</i> (Svent.) J.C.Manning & Vinn.                                 | Liliaceae      | Syn      | Syn  | Acc  | Syn  | Syn  | Syn  | Syn | 3        |   |   |   |   |   | 1 | 1 | A              | S      |            |            |
| <i>Coleostephus myconis</i> (L.) Rchb.f.                                                   | Asteraceae     | Acc      | Acc  | Acc  | Acc  | Acc  | Acc  | Acc | 10       |   |   |   | 1 | 1 | 1 | 1 |                |        | P          |            |
| <i>Colocasia esculenta</i> (L.) Schott                                                     | Araceae        | Acc      | Acc  | Acc  | Acc  | Acc  | Acc  | Acc | 34       |   | 1 | 1 | 1 | 1 |   |   |                |        | I          | C          |
| <i>Combretum indicum</i> (L.) DeFilipps                                                    | Combretaceae   | NL       | NL   | Acc  | Acc  | Acc  | Acc  | Acc | 15       |   |   |   |   | 1 |   |   |                |        | S          | O          |
| <i>Commelina benghalensis</i> L.                                                           | Commelinaceae  | Acc      | Acc  | Acc  | Acc  | Acc  | Acc  | Acc | 21       |   |   |   | 1 | 1 |   |   |                |        | S          |            |
| <i>Commelina diffusa</i> Burm.f.                                                           | Commelinaceae  | Acc      | Acc  | Acc  | Acc  | Acc  | Acc  | Acc | 0        |   | 1 | 1 | 1 | 1 |   |   |                |        | S          |            |
| <i>Commelina latifolia</i> Hochst. ex A. Rich.                                             | Commelinaceae  | Acc      | NL   | Acc  | Acc  | Acc  | Acc  | Acc | 0        |   | 1 |   |   |   |   |   |                |        | S          |            |
| <i>Commicarpus helenae</i> (J. A. Schult.) Meikle                                          | Nyctaginaceae  | Acc      | Acc  | Acc  | Syn  | Acc  | Acc  | Syn | 5        |   |   |   |   |   | 1 |   |                |        | S          |            |
| <i>Conium maculatum</i> L.                                                                 | Apiaceae       | Acc      | Acc  | Acc  | Acc  | Acc  | Acc  | Acc | 17       | 1 | 1 | 1 | 1 | 1 |   |   |                | P      |            |            |
| <i>Convolvulus althaeoides</i> L. subsp. <i>althaeoides</i>                                | Convolvulaceae | Acc      | NL   | Acc  | NL   | AmUn | NL   | Acc | 8        | 1 | 1 | 1 | 1 | 1 | 1 | 1 |                | P      |            |            |
| <i>Convolvulus arvensis</i> L.                                                             | Convolvulaceae | Acc      | Acc  | Acc  | Acc  | Acc  | Acc  | Acc | 39       | 1 | 1 | 1 | 1 | 1 | 1 | 1 |                | P      |            |            |
| <i>Convolvulus canariensis</i> L.                                                          | Convolvulaceae | Acc      | Acc  | Acc  | AmUn | Acc  | Acc  | Acc | 5        | 1 | 1 | 1 | 1 | 1 |   |   | A              | S      |            |            |
| <i>Convolvulus caput-medusae</i> Lowe                                                      | Convolvulaceae | Acc      | Acc  | Acc  | AmUn | Acc  | Acc  | Acc | 0        |   |   |   |   | 1 | 1 |   | A              | S      |            |            |
| <i>Convolvulus farinosus</i> L.                                                            | Convolvulaceae | Acc      | Acc  | Acc  | Acc  | Acc  | Acc  | Acc | 9        |   |   |   | 1 |   |   |   |                |        | P          |            |
| <i>Convolvulus floridus</i> L.f.                                                           | Convolvulaceae | Acc      | Acc  | Acc  | AmUn | Acc  | Acc  | Acc | 3        | 1 | 1 | 1 | 1 | 1 | 1 | 1 | A              | S      |            |            |
| <i>Convolvulus fruticosus</i> Desr. subsp. <i>fruticosus</i>                               | Convolvulaceae | Acc      | NL   | Acc  | NL   | Acc  | Acc  | NL  | 6        | 1 | 1 | 1 | 1 |   |   |   | A              | S      |            |            |
| <i>Convolvulus fruticosus</i> Desr. subsp. <i>glandulosus</i> (Webb) J.R.I.Wood & Scotland | Convolvulaceae | Acc      | Syn  | Acc  | Syn  | Syn  | Acc  | Syn | 2        |   |   |   |   | 1 |   |   | C              | S      |            |            |
| <i>Convolvulus lopezsocasii</i> Svent.                                                     | Convolvulaceae | Acc      | Acc  | Acc  | AmUn | Acc  | Acc  | NL  | 0        |   |   |   |   |   |   | 1 | L              | S      |            |            |
| <i>Convolvulus perraudieri</i> Coss.                                                       | Convolvulaceae | Acc      | Acc  | Syn  | AmUn | Acc  | Acc  | Acc |          |   |   |   | 1 | 1 |   |   | A              | S      |            |            |
| <i>Convolvulus scoparius</i> L. f.                                                         | Convolvulaceae | Acc      | Acc  | Acc  | AmUn | Acc  | Acc  | Acc | 4        | 1 | 1 | 1 | 1 | 1 |   |   | A              | S      |            |            |
| <i>Convolvulus siculus</i> L. subsp. <i>siculus</i>                                        | Convolvulaceae | Acc      | Acc  | Acc  | NL   | Acc  | Acc  | NL  | 1        | 1 | 1 | 1 | 1 | 1 | 1 | 1 |                | P      |            |            |

| Species Name                                                                                  | Family         | Atlantis | Muer | POWO | WFO  | COL  | GBIF | TRY | POWO Syn | H | P | G | T | C | F | L | Endemic Status | Native | Non native | Ornam Crop |
|-----------------------------------------------------------------------------------------------|----------------|----------|------|------|------|------|------|-----|----------|---|---|---|---|---|---|---|----------------|--------|------------|------------|
| <i>Convolvulus siculus</i> L. subsp. <i>elongatus</i> Batt.                                   | Convolvulaceae | Acc      | Syn  | Acc  | NL   | Acc  | Acc  | Syn | 6        |   |   |   | 1 | 1 |   | 1 |                | P      |            |            |
| <i>Convolvulus subauriculatus</i> (Burchard) Linding.                                         | Convolvulaceae | Acc      | Acc  | Syn  | AmUn | Acc  | Acc  | NL  |          |   |   | 1 |   |   |   |   | G              | S      |            |            |
| <i>Convolvulus tricolor</i> L.                                                                | Convolvulaceae | Acc      | Acc  | Acc  | Acc  | Acc  | Acc  | Acc | 2        |   |   |   | 1 | 1 |   |   |                | P      |            |            |
| <i>Convolvulus volubilis</i> Brouss. ex Link                                                  | Convolvulaceae | Acc      | Acc  | Acc  | AmUn | Acc  | Acc  | NL  | 2        |   |   | 1 | 1 |   |   |   | A              | S      |            |            |
| <i>Corchorus depressus</i> (L.) Stocks                                                        | Malvaceae      | Acc      | Acc  | Acc  | Acc  | Acc  | Acc  | Acc | 6        |   |   |   | 1 |   |   |   |                |        | S          |            |
| <i>Coriandrum sativum</i> L.                                                                  | Apiaceae       | Acc      | Acc  | Acc  | Acc  | Acc  | Acc  | Acc | 15       | 1 |   | 1 | 1 | 1 | 1 | 1 |                |        | S          |            |
| <i>Coronilla valentina</i> L. subsp. <i>glauca</i> (L.) Batt.                                 | Fabaceae       | Acc      | Acc  | NL   | Acc  | Acc  | Acc  | Acc |          |   |   |   |   | 1 | 1 | 1 |                |        | P          |            |
| <i>Coronilla viminalis</i> Salisb.                                                            | Fabaceae       | Acc      | NL   | Acc  | Acc  | Acc  | Acc  | Acc | 2        |   |   |   |   | 1 | 1 | 1 |                | P      |            |            |
| <i>Cortaderia selloana</i> (Schult. & Schult.f.) Asch. & Graebn.                              | Poaceae        | Acc      | Acc  | Acc  | Acc  | Acc  | Acc  | Acc | 7        | 1 | 1 |   | 1 | 1 | 1 | 1 |                |        | I          | O          |
| <i>Corymbia citriodora</i> (Hook.) K.D.Hill & L.A.S.Johnson                                   | Myrtaceae      | Acc      | Acc  | Acc  | Acc  | Acc  | Acc  | Acc | 6        |   |   |   |   | 1 |   |   |                |        | S          | O          |
| <i>Corymbia ficifolia</i> (F.Muell.) K.D.Hill & L.A.S.Johnson                                 | Myrtaceae      | Acc      | Acc  | Acc  | Acc  | Acc  | Acc  | Acc | 5        | 1 | 1 | 1 | 1 | 1 |   |   |                |        | S          | O          |
| <i>Cosentinia vellea</i> (Aiton) Tod. subsp. <i>bivalens</i> (Reichstein) Rivas Mart. & Salvo | Pteridaceae    | Acc      | Syn  | Acc  | AmUn | Acc  | Acc  | NL  | 3        | 1 | 1 | 1 | 1 | 1 | 1 | 1 |                | S      |            |            |
| <i>Cosmos bipinnatus</i> Cav.                                                                 | Asteraceae     | Acc      | Acc  | Acc  | Acc  | Acc  | Acc  | Acc | 16       |   |   |   | 1 | 1 |   |   |                |        | S          | O          |
| <i>Cota tinctoria</i> (L.) J.Gay                                                              | Asteraceae     | Acc      | Acc  | Acc  | Acc  | Acc  | Acc  | Acc | 3        |   |   |   |   | 1 |   |   |                |        | P          |            |
| <i>Cotula australis</i> (Sieber ex Spreng.) Hook.f.                                           | Asteraceae     | Acc      | Acc  | Acc  | Acc  | Acc  | Acc  | Acc | 5        | 1 | 1 | 1 | 1 | 1 |   |   |                |        | S          |            |
| <i>Cotyledon macrantha</i> A.Berger                                                           | Crassulaceae   | Acc      | Acc  | Syn  | AmUn | Syn  | Syn  | Syn |          |   |   |   | 1 |   |   |   |                |        | S          | O          |
| <i>Cotyledon orbiculata</i> L.                                                                | Crassulaceae   | Acc      | NL   | Acc  | Acc  | Acc  | Acc  | Acc | 14       |   |   | 1 | 1 | 1 |   |   |                |        | S          | O          |
| <i>Crambe arborea</i> Webb ex Christ                                                          | Brassicaceae   | Acc      | Acc  | Acc  | Acc  | Acc  | Acc  | Acc | 0        |   |   |   | 1 |   |   |   | T              | S      |            |            |
| <i>Crambe feuilleei</i> A.Santos ex Prina & Mart.-Laborde                                     | Brassicaceae   | Acc      | Acc  | Acc  | Acc  | Acc  | Acc  | NL  | 0        | 1 |   |   |   |   |   |   | H              | S      |            |            |
| <i>Crambe gomeraea</i> Webb ex Christ subsp. <i>gomeraea</i>                                  | Brassicaceae   | Acc      | Syn  | NL   | Syn  | AmUn | Syn  | NL  |          |   |   | 1 |   |   |   |   | G              | S      |            |            |
| <i>Crambe gomeraea</i> Webb ex Christ subsp. <i>hirsuta</i> A.Prina                           | Brassicaceae   | Acc      | Syn  | Acc  | NL   | AmUn | Acc  | NL  | 0        |   |   | 1 |   |   |   |   | G              | S      |            |            |

| Species Name                                                            | Family       | Atlantis | Muer | POWO | WFO | COL | GBIF | TRY | POWO Syn | H | P | G | T | C | F | L | Endemic Status | Native | Non native | Ornam Crop |
|-------------------------------------------------------------------------|--------------|----------|------|------|-----|-----|------|-----|----------|---|---|---|---|---|---|---|----------------|--------|------------|------------|
| <i>Crambe laevigata</i> DC. ex H.Christ                                 | Brassicaceae | Acc      | Acc  | Acc  | Acc | Acc | Acc  | Acc | 0        |   |   |   | 1 |   |   |   | T              | S      |            |            |
| <i>Crambe microcarpa</i> A.Santos                                       | Brassicaceae | Acc      | Acc  | Acc  | Acc | Acc | Acc  | NL  | 0        |   | 1 |   |   |   |   |   | P              | S      |            |            |
| <i>Crambe pritzelii</i> Bolle                                           | Brassicaceae | Acc      | Acc  | Acc  | Acc | Acc | Acc  | Acc | 1        |   |   |   |   | 1 |   |   | C              | S      |            |            |
| <i>Crambe santosii</i> Bramwell                                         | Brassicaceae | Acc      | Acc  | Acc  | Acc | Syn | NL   | Syn | 0        |   | 1 |   |   |   |   |   | P              | S      |            |            |
| <i>Crambe scaberrima</i> Webb ex Bramwell                               | Brassicaceae | Acc      | Acc  | Acc  | Acc | Acc | Acc  | Acc | 0        |   |   |   | 1 |   |   |   | T              | S      |            |            |
| <i>Crambe scoparia</i> Svent.                                           | Brassicaceae | Acc      | Acc  | Acc  | Acc | Acc | Acc  | NL  | 0        |   |   |   |   | 1 |   |   | C              | S      |            |            |
| <i>Crambe strigosa</i> L'Hér.                                           | Brassicaceae | Acc      | Acc  | Acc  | Acc | Acc | Acc  | Acc | 1        | 1 | 1 | 1 | 1 | 1 |   |   | A              | S      |            |            |
| <i>Crambe sventenii</i> Pett. ex Bramwell & Sunding                     | Brassicaceae | Acc      | Acc  | Acc  | Acc | Acc | Acc  | Acc | 0        |   |   |   |   |   | 1 |   | F              | S      |            |            |
| <i>Crambe tamadabensis</i> Prina & Marrero Rodr.                        | Brassicaceae | Acc      | Acc  | Acc  | Acc | Acc | Acc  | NL  | 0        |   |   |   |   | 1 |   |   | C              | S      |            |            |
| <i>Crambe wildpretii</i> Prina & Bramwell                               | Brassicaceae | Acc      | Acc  | Acc  | Acc | Acc | Acc  | NL  | 0        |   |   | 1 |   |   |   |   | G              | S      |            |            |
| <i>Crassula campestris</i> (Eckl. & Zeyh.) Endl.                        | Crassulaceae | Acc      | Acc  | Acc  | Acc | Acc | Acc  | Acc | 4        | 1 | 1 | 1 | 1 | 1 |   | 1 |                |        | S          |            |
| <i>Crassula multicava</i> Lem.                                          | Crassulaceae | Acc      | Acc  | Acc  | Acc | Acc | Acc  | Acc | 2        | 1 | 1 | 1 | 1 | 1 |   |   |                |        | I          | O          |
| <i>Crassula muscosa</i> L.                                              | Crassulaceae | NL       | Syn  | Acc  | Acc | Acc | Acc  | Acc | 22       | 1 | 1 | 1 | 1 | 1 |   |   |                |        | I          | O          |
| <i>Crassula ovata</i> (Mill.) Druce                                     | Crassulaceae | Acc      | Acc  | Acc  | Acc | Acc | Acc  | Acc | 8        |   | 1 | 1 | 1 | 1 |   | 1 |                |        | S          | O          |
| <i>Crassula tetragona</i> L.                                            | Crassulaceae | Acc      | NL   | Acc  | Acc | Acc | Acc  | Acc | 11       |   | 1 |   | 1 |   |   |   |                |        | S          | O          |
| <i>Crassula tillaea</i> Lest.-Garl.                                     | Crassulaceae | Acc      | Acc  | Acc  | Acc | Acc | Acc  | Acc | 4        | 1 | 1 | 1 | 1 | 1 | 1 | 1 | P              |        |            |            |
| <i>Crataegus monogyna</i> Jacq.                                         | Rosaceae     | NL       | Acc  | Acc  | Acc | Acc | Acc  | Acc | 84       |   |   |   |   | 1 |   |   |                |        | S          | O          |
| <i>Crepis bursifolia</i> L.                                             | Asteraceae   | Acc      | Acc  | Acc  | Acc | Acc | Acc  | Acc | 9        |   |   |   | 1 |   |   |   |                |        | P          |            |
| <i>Crepis canariensis</i> (Sch.Bip. ex Sch.Bip.) Babc. ex Babc.         | Asteraceae   | Acc      | Acc  | Acc  | Acc | Acc | Acc  | Acc | 3        |   |   |   |   |   | 1 | 1 | A              | S      |            |            |
| <i>Crepis capillaris</i> (L.) Wallr.                                    | Asteraceae   | Acc      | Acc  | Acc  | Acc | Acc | Acc  | Acc | 33       |   | 1 |   | 1 | 1 |   |   |                | P      |            |            |
| <i>Crepis foetida</i> L.                                                | Asteraceae   | Acc      | Acc  | Acc  | Acc | Acc | Acc  | Acc | 11       | 1 | 1 | 1 | 1 | 1 |   |   |                | P      |            |            |
| <i>Crepis juvenalis</i> (Delile) Babc.                                  | Asteraceae   | Acc      | Syn  | Acc  | Acc | Acc | Acc  | NL  | 2        |   |   |   | 1 |   |   |   |                | P      |            |            |
| <i>Crepis vesicaria</i> L. subsp. <i>taraxacifolia</i> (Thuill.) Thell. | Asteraceae   | Syn      | Syn  | Acc  | Acc | Acc | Acc  | Acc | 50       |   |   |   | 1 | 1 |   |   |                | P      |            |            |

| Species Name                                                                          | Family         | Atlantis | Muer | POWO | WFO  | COL | GBIF | TRY | POWO Syn | H | P | G | T | C | F | L | Endemic Status | Native | Non native | Ornam Crop |
|---------------------------------------------------------------------------------------|----------------|----------|------|------|------|-----|------|-----|----------|---|---|---|---|---|---|---|----------------|--------|------------|------------|
| <i>Cressa cretica</i> L.                                                              | Convolvulaceae | Acc      | Acc  | Acc  | Acc  | Acc | Acc  | Acc | 7        |   |   |   |   | 1 |   |   |                |        | P          |            |
| <i>Crithmum maritimum</i> L.                                                          | Apiaceae       | Acc      | Acc  | Acc  | AmUn | Acc | Acc  | Acc | 2        | 1 | 1 | 1 | 1 | 1 |   |   |                | S      |            |            |
| <i>Cucurbita moschata</i> Duchesne                                                    | Cucurbitaceae  | NL       | NL   | Acc  | Acc  | Acc | Acc  | Acc | 14       |   | 1 | 1 | 1 | 1 | 1 | 1 |                |        | S          | C          |
| <i>Cucurbita pepo</i> L.                                                              | Cucurbitaceae  | Acc      | Acc  | Acc  | Acc  | Acc | Acc  | Acc | 42       | 1 | 1 | 1 | 1 | 1 | 1 | 1 |                |        | S          | C          |
| <i>Culcita macrocarpa</i> C. Presl                                                    | Dicksoniaceae  | Acc      | Acc  | Acc  | AmUn | Acc | Acc  | Acc | 2        |   |   |   | 1 |   |   |   |                | S      |            |            |
| <i>Cullen americanum</i> (L.) Rydb. in Britton                                        | Fabaceae       | Acc      | Acc  | Acc  | Acc  | Acc | Acc  | Acc | 9        |   |   |   |   | 1 |   |   |                |        | P          |            |
| <i>Cuphea hyssopifolia</i> Kunth                                                      | Lythraceae     | NL       | NL   | Acc  | Acc  | Acc | Acc  | Acc | 5        |   | 1 |   | 1 | 1 |   |   |                |        | S          |            |
| <i>Cupressus sempervirens</i> L.                                                      | Cupressaceae   | Acc      | Acc  | Acc  | Acc  | Acc | Acc  | Acc | 24       | 1 |   | 1 |   | 1 |   |   |                |        | S          | O          |
| <i>Curio talinoides</i> (DC.) P.V.Heath var. <i>aizoides</i> (DC.) P.V.Heath          | Asteraceae     | Syn      | NL   | Acc  | Acc  | Acc | Acc  | NL  | 8        |   | 1 |   |   |   |   |   |                |        | S          | O          |
| <i>Cuscuta approximata</i> Bab.                                                       | Cuscutaceae    | Acc      | Acc  | Acc  | Acc  | Acc | Acc  | Acc | 2        |   |   |   | 1 | 1 | 1 | 1 |                | P      |            |            |
| <i>Cuscuta campestris</i> Yunk.                                                       | Cuscutaceae    | Acc      | Acc  | Acc  | Acc  | Syn | Syn  | Acc | 5        |   |   |   |   | 1 |   |   |                | P      |            |            |
| <i>Cuscuta planiflora</i> Ten.                                                        | Cuscutaceae    | Acc      | Acc  | Acc  | Acc  | Acc | Acc  | Acc | 1        | 1 | 1 | 1 | 1 | 1 | 1 | 1 |                | P      |            |            |
| <i>Cutandia dichotoma</i> (Forssk.) Trab.                                             | Poaceae        | Acc      | Acc  | Acc  | Acc  | Acc | Acc  | Acc | 6        |   |   |   |   |   | 1 |   |                | P      |            |            |
| <i>Cutandia divaricata</i> (Desf.) Benth.                                             | Poaceae        | Acc      | Acc  | Acc  | Acc  | Acc | Acc  | Acc | 9        |   |   |   |   |   |   | 1 |                | P      |            |            |
| <i>Cutandia maritima</i> (L.) Barbey                                                  | Poaceae        | Acc      | Acc  | Acc  | Acc  | Acc | Acc  | Acc | 10       |   |   |   |   |   | 1 | 1 |                | P      |            |            |
| <i>Cutandia memphitica</i> (Spreng.) Benth.                                           | Poaceae        | Acc      | Acc  | Acc  | Acc  | Acc | Acc  | Acc | 6        |   |   |   | 1 | 1 | 1 | 1 |                | P      |            |            |
| <i>Cyclospermum leptophyllum</i> (Pers.) Sprague                                      | Apiaceae       | Acc      | Acc  | Acc  | Acc  | Acc | Acc  | Acc | 28       |   | 1 |   | 1 | 1 | 1 |   |                |        | S          |            |
| <i>Cydonia oblonga</i> Mill.                                                          | Rosaceae       | Acc      | Acc  | Acc  | Acc  | Acc | Acc  | Acc | 21       | 1 |   |   | 1 |   |   |   |                |        | S          | C          |
| <i>Cylindropuntia bigelovii</i> (Engelm.) F.M. Knuth                                  | Cactaceae      | Acc      | NL   | Acc  | Acc  | Acc | Acc  | Acc | 2        |   |   |   | 1 | 1 |   |   |                |        | S          | O          |
| <i>Cylindropuntia fulgida</i> (Engelm.) F.M. Knuth                                    | Cactaceae      | Acc      | NL   | Acc  | Acc  | Acc | Acc  | Acc | 5        |   |   |   | 1 |   |   |   |                |        | I          | O          |
| <i>Cylindropuntia imbricata</i> (Haw.) F.M. Knuth subsp. <i>rosea</i> (DC.) M.A.Baker | Cactaceae      | Syn      | NL   | Acc  | Syn  | Syn | Acc  | Syn | 5        |   |   |   | 1 |   |   |   |                |        | S          | O          |
| <i>Cylindropuntia prolifera</i> (Engelm.) F.M. Knuth                                  | Cactaceae      | Acc      | NL   | Acc  | Acc  | Acc | Acc  | Acc | 2        |   |   |   | 1 | 1 | 1 |   |                |        | I          | O          |
| <i>Cylindropuntia tunicata</i> (Lehm.) F.M. Knuth                                     | Cactaceae      | Acc      | NL   | Acc  | Acc  | Acc | Acc  | Acc | 15       |   |   |   | 1 |   |   |   |                |        | I          | O          |

| Species Name                                                      | Family         | Atlantis | Muer | POWO | WFO | COL | GBIF | TRY | POWO Syn | H | P | G | T | C | F | L | Endemic Status | Native | Non native | Ornam Crop |
|-------------------------------------------------------------------|----------------|----------|------|------|-----|-----|------|-----|----------|---|---|---|---|---|---|---|----------------|--------|------------|------------|
| <i>Cymbalaria muralis</i> P.Gaertn., B.Mey. & Scherb.             | Antirrhinaceae | Acc      | Acc  | Acc  | Acc | Acc | Acc  | Acc | 21       | 1 | 1 | 1 | 1 | 1 | 1 | 1 |                |        | S          |            |
| <i>Cymodocea nodosa</i> (Ucria) Ascherson                         | Cymodaceae     | Acc      | NL   | Acc  | Acc | Acc | Acc  | Acc | 9        | 1 | 1 | 1 | 1 | 1 | 1 | 1 |                | S      |            |            |
| <i>Cynanchum acutum</i> L.                                        | Asclepiadaceae | Acc      | Acc  | Acc  | Acc | Acc | Acc  | Acc | 2        |   |   |   |   |   | 1 | 1 |                |        | S          | O          |
| <i>Cynara cardunculus</i> L. subsp. <i>flavescens</i> Wiklund     | Asteraceae     | NL       | Acc  | Acc  | Acc | Acc | Acc  | Acc | 0        | 1 | 1 | 1 | 1 | 1 | 1 | 1 |                | S      |            |            |
| <i>Cynara humilis</i> L.                                          | Asteraceae     | Acc      | Acc  | Acc  | Acc | Acc | Acc  | Acc | 1        |   |   |   |   | 1 |   |   |                | P      |            |            |
| <i>Cynodon dactylon</i> (L.) Pers.                                | Poaceae        | Acc      | Acc  | Acc  | Acc | Acc | Acc  | Acc | 68       | 1 | 1 | 1 | 1 | 1 | 1 | 1 |                |        | I          |            |
| <i>Cynoglossum creticum</i> Mill.                                 | Boraginaceae   | Acc      | Acc  | Acc  | Acc | Acc | Acc  | Acc | 7        |   | 1 | 1 | 1 | 1 |   |   |                | P      |            |            |
| <i>Cynomorium coccineum</i> L. subsp. <i>coccineum</i>            | Balnophoraceae | Acc      | NL   | Acc  | Syn | Syn | Acc  | NL  | 0        |   |   |   |   |   |   | 1 |                | P      |            |            |
| <i>Cynosurus echinatus</i> L.                                     | Poaceae        | Acc      | Acc  | Acc  | Acc | Acc | Acc  | Acc | 9        | 1 | 1 | 1 | 1 | 1 |   | 1 |                | P      |            |            |
| <i>Cynosurus elegans</i> Desf.                                    | Poaceae        | Syn      | Acc  | Acc  | Acc | Acc | Acc  | Acc | 16       |   |   |   | 1 | 1 |   |   |                |        | P          |            |
| <i>Cyperus alopecuroides</i> Rottb.                               | Cyperaceae     | Acc      | Acc  | Acc  | Acc | Acc | Acc  | Acc | 8        |   | 1 |   | 1 | 1 |   |   |                | P      |            |            |
| <i>Cyperus alternifolius</i> L. subsp. <i>flabelliformis</i> Kük. | Cyperaceae     | Syn      | Syn  | Acc  | Syn | Acc | Acc  | NL  | 7        |   | 1 | 1 | 1 | 1 |   |   |                |        | I          | O          |
| <i>Cyperus brevifolius</i> (Rottb.) Hassk.                        | Cyperaceae     | Acc      | Acc  | Acc  | Syn | Acc | Acc  | NL  | 2        |   |   |   | 1 | 1 |   |   |                |        | P          | O          |
| <i>Cyperus capitatus</i> Vand.                                    | Cyperaceae     | Acc      | Acc  | Acc  | Acc | Acc | Acc  | Acc | 12       |   | 1 |   | 1 | 1 | 1 | 1 |                | S      |            |            |
| <i>Cyperus eragrostis</i> Lam.                                    | Cyperaceae     | Acc      | Acc  | Acc  | Acc | Acc | Acc  | Acc | 19       |   | 1 | 1 | 1 | 1 |   |   |                |        | P          | O          |
| <i>Cyperus esculentus</i> L.                                      | Cyperaceae     | Acc      | Acc  | Acc  | Acc | Acc | Acc  | Acc | 42       |   | 1 |   |   |   |   |   |                |        | S          | O          |
| <i>Cyperus fuscus</i> L.                                          | Cyperaceae     | Acc      | Acc  | Acc  | Acc | Acc | Acc  | Acc | 9        |   |   |   | 1 |   |   |   |                | P      |            |            |
| <i>Cyperus gracilis</i> R.Br.                                     | Cyperaceae     | Acc      | NL   | Acc  | Acc | Acc | Acc  | Acc | 2        |   |   |   | 1 |   |   |   |                | P      |            |            |
| <i>Cyperus laevigatus</i> L. subsp. <i>laevigatus</i>             | Cyperaceae     | Acc      | Acc  | Acc  | Syn | Acc | Acc  | NL  | 26       |   | 1 | 1 | 1 | 1 | 1 | 1 |                | P      |            |            |
| <i>Cyperus laevigatus</i> L. subsp. <i>distachyos</i> (All.) Ball | Cyperaceae     | Syn      | Acc  | Acc  | Acc | Acc | Acc  | Acc | 9        |   |   |   | 1 |   |   |   |                | P      |            |            |
| <i>Cyperus longus</i> L.                                          | Cyperaceae     | Acc      | Acc  | Acc  | Acc | Acc | Acc  | Acc | 3        |   | 1 | 1 | 1 | 1 | 1 |   |                | P      |            |            |
| <i>Cyperus michelianus</i> (L.) Delile                            | Cyperaceae     | Acc      | Acc  | Acc  | Acc | Acc | Acc  | Acc | 5        |   |   |   | 1 | 1 |   |   |                | P      |            |            |
| <i>Cyperus mundii</i> (Nees) Kunth                                | Cyperaceae     | Acc      | NL   | Acc  | Syn | Acc | Acc  | Syn | 2        |   |   |   | 1 |   |   |   |                |        | P          | O          |
| <i>Cyperus polystachyos</i> Rottb.                                | Cyperaceae     | Acc      | NL   | Acc  | Syn | Acc | Acc  | Acc | 3        |   |   | 1 |   |   |   |   |                |        | P          | O          |

| Species Name                                                                 | Family          | Atlantis | Muer | POWO | WFO  | COL  | GBIF | TRY | POWO Syn | H | P | G | T | C | F | L | Endemic Status | Native | Non native | Ornam Crop |
|------------------------------------------------------------------------------|-----------------|----------|------|------|------|------|------|-----|----------|---|---|---|---|---|---|---|----------------|--------|------------|------------|
| <i>Cyperus rotundus</i> L.                                                   | Cyperaceae      | Acc      | Acc  | Acc  | Acc  | Acc  | Acc  | Acc | 62       | 1 |   | 1 | 1 | 1 | 1 | 1 |                |        | S          | O          |
| <i>Cyperus rubicundus</i> Vahl                                               | Cyperaceae      | Acc      | Acc  | Acc  | Acc  | Acc  | Acc  | Acc | 9        |   |   |   | 1 | 1 |   |   |                | S      |            |            |
| <i>Cyrtomium falcatum</i> (L. f.) C. Presl                                   | Dryopteridaceae | Acc      | Acc  | Acc  | Acc  | Acc  | Acc  | Acc | 11       |   | 1 | 1 | 1 | 1 |   | 1 |                |        | I          | O          |
| <i>Cysticapnos versicaria</i> (L.) Fedde                                     | Papaveraceae    | Syn      | Syn  | Acc  | AmUn | Acc  | Acc  | Syn | 10       |   |   |   |   | 1 | 1 | 1 |                | P      |            |            |
| <i>Cystopteris fragilis</i> (L.) Bernh. subsp. <i>diaphana</i> (Bory) Litard | Athyriaceae     | Syn      | Syn  | Acc  | Syn  | Syn  | Syn  | NL  | 17       | 1 | 1 | 1 | 1 | 1 |   |   |                | S      |            |            |
| <i>Cytinus hypocistis</i> (L.) L.                                            | Rafflesiaceae   | Acc      | Acc  | Acc  | Acc  | Acc  | Acc  | Acc | 4        | 1 | 1 | 1 | 1 | 1 |   |   |                | S      |            |            |
| <i>Cytinus ruber</i> (Fourr.) Fritsch                                        | Rafflesiaceae   | Acc      | Acc  | Acc  | Acc  | Syn  | Acc  | Acc | 1        |   | 1 |   | 1 | 1 |   |   |                | P      |            |            |
| <i>Cytisus filipes</i> Webb                                                  | Fabaceae        | Syn      | Acc  | Acc  | Acc  | Acc  | Acc  | Acc | 1        | 1 | 1 | 1 | 1 |   |   |   | A              | S      |            |            |
| <i>Cytisus scoparius</i> (L.) Link                                           | Fabaceae        | Acc      | Acc  | Acc  | Acc  | Acc  | Acc  | Acc | 28       |   |   | 1 | 1 |   |   |   |                |        | I          | O          |
| <i>Cytisus supranubius</i> (L. f.) Kuntze                                    | Fabaceae        | Syn      | Acc  | Acc  | Acc  | Acc  | Acc  | Acc | 11       |   | 1 |   | 1 |   |   |   | A              | S      |            |            |
| <i>Dactylis glomerata</i> L. subsp. <i>glomerata</i>                         | Poaceae         | Acc      | NL   | Acc  | Syn  | Acc  | Acc  | Acc | 28       | 1 | 1 |   | 1 | 1 |   |   |                | P      |            |            |
| <i>Dactylis glomerata</i> L. subsp. <i>hispanica</i> (Roth) Nyman            | Poaceae         | Acc      | Syn  | Acc  | Acc  | Acc  | Acc  | Acc | 1        |   | 1 |   |   |   |   |   |                |        | P          |            |
| <i>Dactylis metlesicsii</i> P.Schönfelder & D.Ludw.                          | Poaceae         | Acc      | Acc  | NL   | Syn  | Syn  | Syn  | NL  |          |   |   |   | 1 |   |   |   | T              | S      |            |            |
| <i>Dactylis smithii</i> Link. subsp. <i>smithii</i>                          | Poaceae         | Acc      | Acc  | NL   | NL   | AmUn | Acc  | NL  |          | 1 | 1 | 1 | 1 | 1 |   |   |                | S      |            |            |
| <i>Dactylis smithii</i> Link. subsp. <i>hylodes</i> P. F. Parker             | Poaceae         | Acc      | Acc  | Syn  | Syn  | Syn  | Syn  | NL  |          |   | 1 |   | 1 | 1 | 1 | 1 |                | S      |            |            |
| <i>Daphne gnidium</i> L.                                                     | Thymelaeaceae   | Acc      | Acc  | Acc  | Acc  | Acc  | Acc  | Acc | 5        |   | 1 |   | 1 | 1 |   |   |                | S      |            |            |
| <i>Dasispernum capense</i> (Lam.) Magee & B.-E.van Wyk                       | Apiaceae        | Syn      | Syn  | Acc  | Acc  | Acc  | Acc  | Acc | 9        | 1 | 1 | 1 | 1 | 1 |   |   |                | P      |            |            |
| <i>Datura ferox</i> L.                                                       | Solanaceae      | Acc      | NL   | Acc  | Acc  | Acc  | Acc  | Acc | 1        |   |   |   | 1 |   |   |   |                |        | S          | O          |
| <i>Datura innoxia</i> Mill.                                                  | Solanaceae      | Acc      | Acc  | Acc  | Acc  | Acc  | Acc  | Acc | 3        |   | 1 | 1 | 1 | 1 | 1 | 1 |                |        | S          | O          |
| <i>Datura stramonium</i> L.                                                  | Solanaceae      | Acc      | Acc  | Acc  | Acc  | Acc  | Acc  | Acc | 29       | 1 | 1 | 1 | 1 | 1 | 1 | 1 |                |        | S          | O          |
| <i>Daucus aureus</i> Desf.                                                   | Apiaceae        | Acc      | Acc  | Acc  | Acc  | Acc  | Acc  | Acc | 6        |   |   |   | 1 | 1 |   |   |                | P      |            |            |
| <i>Daucus carota</i> L. subsp. <i>maximus</i> (Desf.) Ball                   | Apiaceae        | Acc      | Acc  | NL   | Acc  | Acc  | Acc  | Acc |          | 1 | 1 | 1 | 1 | 1 | 1 |   |                | P      |            | C          |
| <i>Daucus durieua</i> Lange                                                  | Apiaceae        | Acc      | Acc  | Acc  | Acc  | Acc  | Acc  | Acc | 5        |   |   |   | 1 |   |   |   |                |        | P          |            |

| Species Name                                                       | Family          | Atlantis | Muer | POWO | WFO  | COL  | GBIF | TRY | POWO Syn | H | P | G | T | C | F | L | Endemic Status | Native | Non native | Ornam Crop |
|--------------------------------------------------------------------|-----------------|----------|------|------|------|------|------|-----|----------|---|---|---|---|---|---|---|----------------|--------|------------|------------|
| <i>Daucus elegans</i> (Webb ex Bolle) Spalik, Banasiak & Reduron   | Apiaceae        | Acc      | Syn  | Acc  | Syn  | Acc  | Acc  | Syn | 2        | 1 | 1 | 1 | 1 |   |   |   | A              | S      |            |            |
| <i>Daucus pumilus</i> (L.) Hoffmanns. & Link                       | Apiaceae        | Acc      | Syn  | Acc  | Syn  | Acc  | Acc  | Syn | 18       |   |   |   |   |   |   | 1 |                |        | P          |            |
| <i>Davallia canariensis</i> (L.) Sm.                               | Davalliaceae    | Acc      | Acc  | Acc  | Acc  | Acc  | Acc  | Acc | 4        | 1 | 1 | 1 | 1 | 1 | 1 | 1 |                | S      |            |            |
| <i>Delairea odorata</i> Lem.                                       | Asteraceae      | Acc      | Acc  | Acc  | Acc  | Acc  | Acc  | Acc | 2        |   | 1 |   | 1 | 1 |   |   |                |        | I          | O          |
| <i>Delonix regia</i> (Hook.) Raf.                                  | Fabaceae        | NL       | NL   | Acc  | Acc  | Acc  | Acc  | Acc | 3        |   | 1 |   | 1 | 1 | 1 | 1 |                |        | S          | O          |
| <i>Delosperma brunnthaleri</i> (A. Berger) Schwantes & H. Jacobsen | Aiozoaceae      | Acc      | Acc  | Acc  | Acc  | Acc  | Acc  | Acc | 2        |   |   |   | 1 |   |   |   |                |        | S          | O          |
| <i>Delphinium ajacis</i> L.                                        | Ranunculaceae   | Syn      | Acc  | Acc  | Syn  | Acc  | Syn  | Syn | 12       | 1 | 1 |   | 1 |   |   |   |                |        | S          | O          |
| <i>Delphinium consolida</i> L.                                     | Ranunculaceae   | Syn      | Acc  | Acc  | Syn  | Acc  | Acc  | Syn | 13       | 1 |   |   | 1 | 1 |   | 1 |                |        | S          |            |
| <i>Delphinium staphisagria</i> L.                                  | Ranunculaceae   | NL       | Acc  | Acc  | Acc  | Acc  | Acc  | Acc | 3        |   | 1 | 1 | 1 |   |   |   |                |        | P          | O          |
| <i>Dendriopoterium pulidoi</i> Svent.                              | Rosaceae        | Acc      | Acc  | AmUn | AmUn | Acc  | Acc  | NL  | 0        |   |   |   |   | 1 |   |   | C              | S      |            |            |
| <i>Descurainia artemisioides</i> Svent.                            | Brassicaceae    | Acc      | Acc  | Acc  | Acc  | Acc  | Acc  | Acc | 0        |   |   |   |   | 1 |   |   | C              | S      |            |            |
| <i>Descurainia bourgaeana</i> (E. Fourn.) Webb                     | Brassicaceae    | Acc      | Acc  | Acc  | Acc  | Acc  | Acc  | Acc | 1        |   |   |   | 1 |   |   |   | T              | S      |            |            |
| <i>Descurainia gilva</i> Svent.                                    | Brassicaceae    | Acc      | Acc  | Acc  | Acc  | Acc  | Acc  | Acc | 0        |   | 1 |   |   |   |   |   | P              | S      |            |            |
| <i>Descurainia gonzalezii</i> Svent.                               | Brassicaceae    | Acc      | Acc  | Acc  | Acc  | AmUn | Acc  | Syn | 0        |   |   |   | 1 |   |   |   | T              | S      |            |            |
| <i>Descurainia lemsii</i> Bramwell                                 | Brassicaceae    | Acc      | Acc  | Acc  | Acc  | Acc  | Acc  | Acc | 0        |   |   |   | 1 |   |   |   | T              | S      |            |            |
| <i>Descurainia millefolia</i> (Jacq.) Webb & Berthel.              | Brassicaceae    | Acc      | Acc  | Acc  | Acc  | Acc  | Acc  | Acc | 3        |   | 1 | 1 | 1 |   |   |   | A              | S      |            |            |
| <i>Descurainia preauxiana</i> (Webb) Webb ex O.E.Schulz            | Brassicaceae    | Acc      | Acc  | Acc  | Acc  | Acc  | Acc  | Acc | 3        |   |   |   |   | 1 |   |   | C              | S      |            |            |
| <i>Desmanthus virgatus</i> (L.) Willd.                             | Fabaceae        | Syn      | Acc  | Acc  | Acc  | Acc  | Acc  | Acc | 18       |   |   |   |   | 1 | 1 |   |                |        | S          | O          |
| <i>Dianthus caryophyllus</i> L.                                    | Caryophyllaceae | NL       | NL   | Acc  | Acc  | Acc  | Acc  | Acc | 18       |   |   |   | 1 |   |   |   |                |        | S          | O          |
| <i>Dichanthium annulatum</i> (Forssk.) Stapf                       | Poaceae         | Acc      | Acc  | Acc  | Acc  | Acc  | Acc  | Acc | 5        |   |   |   | 1 |   |   |   |                | P      |            |            |
| <i>Dichanthium foveolatum</i> (Delile) Roberty                     | Poaceae         | Acc      | Acc  | Acc  | Acc  | Acc  | Acc  | Acc | 10       | 1 | 1 | 1 | 1 | 1 | 1 |   |                | P      |            |            |
| <i>Dicheranthus plocamoides</i> Webb                               | Caryophyllaceae | Acc      | Acc  | Acc  | Acc  | Acc  | Acc  | Acc | 0        |   |   | 1 | 1 |   |   |   | A              | S      |            |            |
| <i>Dichondra micrantha</i> Urb.                                    | Convolvulaceae  | Acc      | Acc  | Acc  | Acc  | Acc  | Acc  | Acc | 0        |   | 1 |   | 1 | 1 | 1 |   |                |        | S          | O          |



| Species Name                                                                                                    | Family         | Atlantis | Muer | POWO | WFO  | COL | GBIF | TRY | POWO Syn | H | P | G | T | C | F | L | Endemic Status | Native | Non native | Ornam Crop |
|-----------------------------------------------------------------------------------------------------------------|----------------|----------|------|------|------|-----|------|-----|----------|---|---|---|---|---|---|---|----------------|--------|------------|------------|
| <i>Digitalis canariensis</i> L.                                                                                 | Plantaginaceae | Syn      | Syn  | Acc  | Syn  | Acc | Acc  | Syn | 3        |   | 1 | 1 | 1 |   |   |   | A              | S      |            |            |
| <i>Digitalis chalcantha</i> (Svent. & O'Shan.) Albach, Bräuchler & Heubl                                        | Plantaginaceae | Syn      | Syn  | Acc  | AmUn | Acc | Acc  | Syn | 1        |   |   |   |   | 1 |   |   | C              | S      |            |            |
| <i>Digitalis isabelliana</i> (Webb) Linding.                                                                    | Plantaginaceae | Syn      | Syn  | Acc  | Syn  | Acc | Acc  | Syn | 2        |   |   |   |   | 1 |   |   | C              | S      |            |            |
| <i>Digitalis purpurea</i> L. subsp. <i>purpurea</i>                                                             | Plantaginaceae | Acc      | NL   | NL   | NL   | Acc | Acc  | Acc |          |   | 1 |   | 1 |   |   |   |                |        | S          | O          |
| <i>Digitaria ciliaris</i> (Retz.) Koeler                                                                        | Poaceae        | Acc      | Acc  | Acc  | Acc  | Acc | Acc  | Acc | 50       | 1 | 1 | 1 | 1 | 1 | 1 |   |                |        | P          |            |
| <i>Digitaria ischaemum</i> (Schreb.) Muhl.                                                                      | Poaceae        | Acc      | NL   | Acc  | Acc  | Acc | Acc  | Acc | 20       |   | 1 |   | 1 | 1 | 1 |   |                |        | P          |            |
| <i>Digitaria nodosa</i> Parl.                                                                                   | Poaceae        | Acc      | Acc  | Acc  | Acc  | Acc | Acc  | Acc | 5        |   |   |   | 1 | 1 | 1 |   |                |        | P          |            |
| <i>Digitaria nuda</i> Schumach.                                                                                 | Poaceae        | Acc      | NL   | Acc  | Acc  | Acc | Acc  | Acc | 13       |   | 1 |   |   |   |   |   |                |        | P          |            |
| <i>Digitaria radicata</i> (J.Presl) Miq.                                                                        | Poaceae        | Acc      | Acc  | Acc  | Acc  | Acc | Acc  | Acc | 10       |   | 1 |   |   | 1 |   |   |                |        | P          |            |
| <i>Digitaria sanguinalis</i> (L.) Scop.                                                                         | Poaceae        | Acc      | Acc  | Acc  | Acc  | Acc | Acc  | Acc | 53       | 1 | 1 | 1 | 1 | 1 |   | 1 |                |        | I          |            |
| <i>Digitaria setigera</i> Roth.                                                                                 | Poaceae        | NL       | NL   | Acc  | Acc  | Acc | Acc  | Acc | 20       |   |   |   |   | 1 |   |   |                |        | S          |            |
| <i>Digitaria violascens</i> Link                                                                                | Poaceae        | Acc      | Acc  | Acc  | Acc  | Acc | Acc  | Acc | 23       |   |   |   | 1 |   |   |   |                |        | I          |            |
| <i>Dimorphotheca ecklonis</i> DC.                                                                               | Asteraceae     | Syn      | NL   | Acc  | Syn  | Acc | Acc  | Syn | 1        |   | 1 |   | 1 | 1 | 1 |   |                |        | S          | O          |
| <i>Dioscorea communis</i> (L.) Caddick & Wilkin                                                                 | Dioscoreaceae  | Acc      | Acc  | Acc  | Acc  | Acc | Acc  | Acc | 13       | 1 | 1 | 1 | 1 | 1 |   |   |                | S      |            |            |
| <i>Dipcadi serotinum</i> (L.) Medik.                                                                            | Liliaceae      | Acc      | Acc  | Acc  | Acc  | Acc | Acc  | Acc | 10       |   |   | 1 | 1 | 1 | 1 | 1 |                | P      |            |            |
| <i>Diplachne fusca</i> (L.) P.Beauv. ex Roem. & Schult. subsp. <i>uninervia</i> (J.Presl) P.M.Peterson & N.Snow | Poaceae        | Acc      | NL   | Acc  | Syn  | Acc | Acc  | Syn | 26       |   |   |   |   | 1 |   |   |                |        | P          |            |
| <i>Diplazium caudatum</i> (Cac.) Jermy                                                                          | Athyriaceae    | Acc      | Acc  | Acc  | AmUn | Acc | Acc  | Acc | 13       |   | 1 | 1 | 1 | 1 |   |   |                | S      |            |            |
| <i>Diplotaxis catholica</i> (L.) DC.                                                                            | Brassicaceae   | Acc      | Acc  | Acc  | Acc  | Acc | Acc  | Acc | 5        |   |   |   |   | 1 |   |   |                | P      |            |            |
| <i>Diplotaxis muralis</i> (L.) DC.                                                                              | Brassicaceae   | Acc      | Acc  | Acc  | Acc  | Acc | Acc  | Acc | 19       |   |   |   | 1 |   |   |   |                | P      |            |            |
| <i>Diplotaxis tenuifolia</i> (L.) DC.                                                                           | Brassicaceae   | Acc      | Acc  | Acc  | Acc  | Acc | Acc  | Acc | 19       |   |   |   |   | 1 |   | 1 |                |        | S          |            |
| <i>Dipsacus fullonum</i> L.                                                                                     | Dipsacaceae    | Acc      | Acc  | Acc  | Acc  | Syn | Acc  | Acc | 18       |   | 1 |   | 1 |   |   |   |                |        | S          |            |
| <i>Disocactus speciosus</i> (Cav.) Barthlott                                                                    | Cactaceae      | Acc      | NL   | Acc  | Acc  | Acc | Acc  | NL  | 43       |   |   |   |   | 1 |   |   |                |        | S          | O          |
| <i>Disphyma crassifolium</i> (L.) L.Bolus                                                                       | Aizoaceae      | Acc      | Acc  | Acc  | Acc  | Acc | Acc  | Acc | 1        |   | 1 |   |   | 1 | 1 |   |                |        | S          | O          |

| Species Name                                                             | Family          | Atlantis | Muer | POWO | WFO  | COL | GBIF | TRY | POWO Syn | H | P | G | T | C | F | L | Endemic Status | Native | Non native | Ornam Crop |
|--------------------------------------------------------------------------|-----------------|----------|------|------|------|-----|------|-----|----------|---|---|---|---|---|---|---|----------------|--------|------------|------------|
| <i>Distimake tuberosus</i> (L.) A.R.Simões & Staples                     | Convolvulaceae  | NL       | Syn  | Acc  | Syn  | Acc | Acc  | Syn | 13       |   |   |   | 1 | 1 |   |   |                |        | S          | O          |
| <i>Dittrichia viscosa</i> (L.) Greuter                                   | Asteraceae      | Acc      | Acc  | Acc  | Acc  | Acc | Acc  | Acc | 3        | 1 | 1 | 1 | 1 | 1 | 1 | 1 |                | P      |            |            |
| <i>Draba verna</i> L.                                                    | Brassicaceae    | Syn      | NL   | Acc  | Syn  | Acc | Acc  | Acc | 104      |   |   |   | 1 |   |   |   |                |        | P          |            |
| <i>Dracaena draco</i> (L.) L. subsp. <i>draco</i>                        | Asparagaceae    | Acc      | Acc  | Acc  | Syn  | Acc | Acc  | NL  | 7        | 1 | 1 | 1 | 1 | 1 |   |   |                | S      |            | O          |
| <i>Dracaena tamaranae</i> Marrero Rodr., R.S.Almeira & M.Gonzales-Martin | Asparagaceae    | Acc      | Acc  | Acc  | Acc  | Acc | Acc  | Acc | 0        |   |   |   |   | 1 |   |   | C              | S      |            |            |
| <i>Dracocephalum thymiflorum</i> L.                                      | Lamiaceae       | Acc      | Acc  | Acc  | Acc  | Acc | Acc  | Acc | 4        |   |   | 1 | 1 |   |   |   |                |        | S          |            |
| <i>Dracunculus canariensis</i> Kunth                                     | Araceae         | Acc      | Acc  | Acc  | Acc  | Acc | Acc  | Acc | 1        | 1 | 1 | 1 | 1 | 1 | 1 |   | A              | S      |            |            |
| <i>Drimia hesperia</i> (Webb & Berthel.) J.C.Manning & Goldblatt         | Hyacinthaceae   | Acc      | Acc  | Acc  | Acc  | Acc | Acc  | Acc | 3        |   |   |   | 1 |   |   |   | T              | S      |            |            |
| <i>Drimia maritima</i> (L.) Stearn                                       | Hyacinthaceae   | Acc      | Acc  | Acc  | Acc  | Acc | Acc  | Acc | 17       |   |   |   |   |   | 1 | 1 |                | S      |            |            |
| <i>Drimiopsis maculata</i> Lindl. & Paxton                               | Hyacinthaceae   | Acc      | Acc  | Acc  | Acc  | Acc | Acc  | Acc | 3        |   |   | 1 |   |   |   |   |                |        | P          |            |
| <i>Drosanthemum floribundum</i> (Haw.) Schwantes                         | Aizoaceae       | Acc      | Acc  | Acc  | Acc  | Acc | Acc  | Acc | 8        |   |   |   |   | 1 |   |   |                |        | I          | O          |
| <i>Drosanthemum hispidum</i> (L.) Schwantes                              | Aizoaceae       | Acc      | Acc  | Acc  | Acc  | Acc | Acc  | Acc | 1        |   |   |   | 1 |   |   |   |                |        | I          | O          |
| <i>Drusa glandulosa</i> (Poir.) H.Wolff ex Engl.                         | Apiaceae        | Acc      | Acc  | Acc  | Acc  | Acc | Acc  | Acc | 5        | 1 | 1 | 1 | 1 | 1 | 1 | 1 |                | S      |            |            |
| <i>Dryopteris abbreviata</i> (Lam. & DC.) Newman                         | Dryopteridaceae | Syn      | Syn  | Acc  | Acc  | Acc | Acc  | Syn | 22       |   |   | 1 | 1 |   |   |   |                | S      |            |            |
| <i>Dryopteris aemula</i> (Aiton) Kuntze                                  | Dryopteridaceae | Acc      | Acc  | Acc  | AmUn | Acc | Acc  | Acc | 0        |   |   | 1 |   |   |   |   |                | S      |            |            |
| <i>Dryopteris guanchica</i> Gibby & Jermy                                | Dryopteridaceae | Acc      | Acc  | Acc  | AmUn | Acc | Acc  | Acc | 0        | 1 |   | 1 | 1 |   |   |   |                | S      |            |            |
| <i>Dryopteris oligodonta</i> Pic.Serm.                                   | Dryopteridaceae | Acc      | Acc  | Acc  | AmUn | Acc | Acc  | Acc | 11       | 1 | 1 | 1 | 1 | 1 |   |   | A              | S      |            |            |
| <i>Duranta erecta</i> L.                                                 | Verbenaceae     | NL       | NL   | Acc  | Acc  | Acc | Acc  | Acc | 46       |   |   |   |   | 1 | 1 |   |                |        | S          | O          |
| <i>Dysphania ambrosioides</i> (L.) Mosyakin & Clemants                   | Chenopodiaceae  | Acc      | Acc  | Acc  | Acc  | Acc | Acc  | Acc | 53       | 1 | 1 | 1 | 1 | 1 | 1 | 1 |                |        | S          |            |
| <i>Dysphania anthelmintica</i> (L.) Mosyakin & Clemants                  | Chenopodiaceae  | Acc      | Acc  | Acc  | Syn  | Acc | Acc  | Syn | 10       |   | 1 | 1 |   | 1 |   |   |                |        | S          |            |
| <i>Dysphania multifida</i> (L.) Mosyakin & Clemants                      | Chenopodiaceae  | Acc      | Acc  | Acc  | Acc  | Acc | Acc  | Acc | 17       |   |   | 1 | 1 | 1 |   | 1 |                |        | S          |            |
| <i>Echinocereus rigidissimus</i> (Engelm.) Hirscht                       | Cacactaceae     | NL       | NL   | Acc  | Acc  | Acc | Acc  | Acc | 3        |   |   |   | 1 |   |   |   |                |        | S          | O          |
| <i>Echinochloa colonum</i> (L.) Link                                     | Poaceae         | Acc      | Acc  | Acc  | Syn  | NL  | Acc  | Acc | 45       |   | 1 | 1 |   | 1 |   |   |                |        | P          |            |

| Species Name                                                                 | Family       | Atlantis | Muer | POWO | WFO  | COL  | GBIF | TRY | POWO Syn | H | P | G | T | C | F | L | Endemic Status | Native | Non native | Ornam Crop |
|------------------------------------------------------------------------------|--------------|----------|------|------|------|------|------|-----|----------|---|---|---|---|---|---|---|----------------|--------|------------|------------|
| <i>Echinochloa crus-galli</i> (L.) P.Beauv. subsp. <i>crus-galli</i>         | Poaceae      | NL       | NL   | NL   | NL   | AmUn | Acc  | NL  |          |   | 1 | 1 | 1 | 1 | 1 | 1 |                |        | P          |            |
| <i>Echinopsis huascha</i> (Web.) Friedrich & G.D.Rowley                      | Cactaceae    | Syn      | NL   | Acc  | Acc  | Acc  | Acc  | Acc | 44       |   |   |   | 1 |   |   |   |                |        | S          | O          |
| <i>Echinopsis lageniformis</i> (C.F.Först.) H.Friedrich & G.D.Rowley         | Cactaceae    | NL       | NL   | Acc  | Syn  | Acc  | Acc  | Acc | 12       |   |   |   | 1 |   |   |   |                |        | S          | O          |
| <i>Echinopsis spachiana</i> (Lem.) Riccob.                                   | Cactaceae    | NL       | NL   | Acc  | Acc  | Syn  | Acc  | Acc | 6        |   |   |   |   | 1 |   |   |                |        | S          | O          |
| <i>Echinopsis volliana</i> H.Friedrich & G.D.Rowley                          | Cactaceae    | NL       | NL   | Acc  | Acc  | Acc  | Acc  | Acc | 12       |   |   |   | 1 |   |   |   |                |        | S          | O          |
| <i>Echium acanthocarpum</i> Svent.                                           | Boraginaceae | Acc      | Acc  | Acc  | NL   | Acc  | Acc  | Acc | 0        |   |   | 1 |   |   |   |   | G              | S      |            |            |
| <i>Echium aculeatum</i> Poir.                                                | Boraginaceae | Acc      | Acc  | Acc  | Acc  | Acc  | Acc  | Acc | 0        | 1 |   | 1 | 1 |   |   |   | A              | S      |            |            |
| <i>Echium auberianum</i> Webb & Berthel.                                     | Boraginaceae | Acc      | Acc  | Acc  | Acc  | Acc  | Acc  | Acc | 1        |   |   |   | 1 |   |   |   | T              | S      |            |            |
| <i>Echium bethencourtii</i> A. Santos                                        | Boraginaceae | Acc      | Acc  | Acc  | Acc  | AmUn | Acc  | NL  | 0        |   | 1 |   |   |   |   |   | P              | S      |            |            |
| <i>Echium bonnetii</i> Coincy                                                | Boraginaceae | Acc      | Acc  | Acc  | Acc  | Acc  | Acc  | Acc | 3        |   |   |   | 1 | 1 | 1 | 1 | A              | S      |            |            |
| <i>Echium brevirame</i> Sprague & Hutch.                                     | Boraginaceae | Acc      | Acc  | Acc  | Acc  | Acc  | Acc  | Acc | 0        |   | 1 |   |   |   |   |   | P              | S      |            |            |
| <i>Echium callithyrsum</i> Webb ex Bolle                                     | Boraginaceae | Acc      | Acc  | Acc  | Acc  | Acc  | Acc  | Acc | 0        |   |   |   |   | 1 |   |   | C              | S      |            |            |
| <i>Echium decaisnei</i> Webb & Berthel. subsp. <i>decaisnei</i>              | Boraginaceae | Acc      | Acc  | NL   | NL   | AmUn | Acc  | NL  |          |   |   |   |   | 1 |   |   | C              | S      |            |            |
| <i>Echium decaisnei</i> Webb & Berthel. subsp. <i>purpurisense</i> Bramwell  | Boraginaceae | Acc      | Acc  | Acc  | Acc  | Syn  | Syn  | NL  | 1        |   |   |   |   |   | 1 | 1 | A              | S      |            |            |
| <i>Echium giganteum</i> L.f.                                                 | Boraginaceae | Acc      | Acc  | Acc  | Acc  | Acc  | Acc  | Acc | 3        |   |   |   | 1 |   |   |   | T              | S      |            |            |
| <i>Echium handiense</i> Svent                                                | Boraginaceae | Acc      | Acc  | Acc  | Acc  | Acc  | Acc  | NL  | 0        |   |   |   |   |   | 1 |   | F              | S      |            |            |
| <i>Echium hierrense</i> Webb ex Bolle                                        | Boraginaceae | Acc      | Acc  | Acc  | Acc  | Acc  | Acc  | Acc | 0        | 1 |   |   |   |   |   |   | H              | S      |            |            |
| <i>Echium horridum</i> Batt.                                                 | Boraginaceae | Acc      | Acc  | Acc  | Acc  | Acc  | Acc  | Acc | 3        |   |   |   |   | 1 |   |   |                | S      |            |            |
| <i>Echium leucophaeum</i> Webb ex Sprague & Hutch.                           | Boraginaceae | Acc      | Acc  | Acc  | Acc  | Acc  | Acc  | Acc | 0        |   |   |   | 1 |   |   |   | T              | S      |            |            |
| <i>Echium onosmifolium</i> Webb & Berthel. subsp. <i>onosmifolium</i>        | Boraginaceae | Acc      | Acc  | NL   | NL   | Acc  | Acc  | NL  |          |   |   |   |   | 1 |   |   | C              | S      |            |            |
| <i>Echium onosmifolium</i> Webb & Berthel. subsp. <i>spectabile</i> G.Kunkel | Boraginaceae | Acc      | Acc  | Acc  | NL   | Acc  | Acc  | NL  | 0        |   |   |   |   | 1 |   |   | C              | S      |            |            |
| <i>Echium perezii</i> Sprague                                                | Boraginaceae | Acc      | Syn  | Syn  | AmUn | Acc  | Syn  | NL  | 2        |   | 1 |   |   |   |   |   | P              | S      |            |            |

| Species Name                                                                    | Family           | Atlantis | Muer | POWO | WFO | COL  | GBIF | TRY | POWO Syn | H | P | G | T | C | F | L | Endemic Status | Native | Non native | Ornam Crop |
|---------------------------------------------------------------------------------|------------------|----------|------|------|-----|------|------|-----|----------|---|---|---|---|---|---|---|----------------|--------|------------|------------|
| <i>Echium pininana</i> Webb & Berthel.                                          | Boraginaceae     | Acc      | Acc  | Acc  | Acc | Acc  | Acc  | Acc | 0        |   | 1 |   |   |   |   |   | P              | S      |            |            |
| <i>Echium pitardii</i> A. Chev.                                                 | Boraginaceae     | Syn      | Syn  | Acc  | Acc | Syn  | Syn  | NL  | 2        |   |   |   |   |   |   | 1 | L              | S      |            |            |
| <i>Echium plantagineum</i> L.                                                   | Boraginaceae     | Acc      | Acc  | Acc  | Acc | Acc  | Acc  | Acc | 15       | 1 | 1 | 1 | 1 | 1 |   |   |                | P      |            |            |
| <i>Echium simplex</i> DC.                                                       | Boraginaceae     | Acc      | Acc  | Acc  | Acc | Acc  | Acc  | Acc | 0        |   |   |   | 1 |   |   |   | T              | S      |            | O          |
| <i>Echium strictum</i> L.f. subsp. <i>strictum</i>                              | Boraginaceae     | Acc      | Acc  | NL   | Acc | Acc  | Acc  | NL  |          | 1 | 1 | 1 | 1 | 1 |   |   | A              | S      |            |            |
| <i>Echium strictum</i> L.f. subsp. <i>exasperatum</i> (Webb ex Coincy) Bramwell | Boraginaceae     | Acc      | Acc  | Acc  | Acc | Acc  | Acc  | NL  | 1        |   |   |   | 1 |   |   |   | G              | S      |            |            |
| <i>Echium strictum</i> L.f. subsp. <i>gomeræ</i> (Pit.) Bramwell                | Boraginaceae     | Acc      | Acc  | Acc  | Acc | AmUn | Acc  | NL  | 0        |   |   | 1 |   |   |   |   | G              | S      |            |            |
| <i>Echium sventenii</i> Bramwell                                                | Boraginaceae     | Acc      | Acc  | Acc  | Acc | Acc  | Acc  | NL  | 0        |   |   |   | 1 |   |   |   | T              | S      |            |            |
| <i>Echium thyrsoflorum</i> Masson ex Link                                       | Boraginaceae     | Syn      | Syn  | Acc  | Acc | Syn  | Syn  | NL  | 2        |   | 1 |   |   |   |   |   | P              | S      |            |            |
| <i>Echium triste</i> Svent. subsp. <i>triste</i>                                | Boraginaceae     | Acc      | Acc  | NL   | NL  | Acc  | Acc  | NL  |          |   |   |   |   | 1 |   |   | C              | S      |            |            |
| <i>Echium triste</i> Svent. subsp. <i>nivariense</i> (Svent.) Bramwell          | Boraginaceae     | Acc      | Acc  | Acc  | Acc | Acc  | Acc  | Acc | 0        |   |   | 1 | 1 |   |   |   | A              | S      |            |            |
| <i>Echium virescens</i> DC.                                                     | Boraginaceae     | Acc      | Acc  | Acc  | Acc | Acc  | Acc  | Acc | 1        |   |   |   | 1 |   |   |   | T              | S      |            |            |
| <i>Echium webbii</i> Coincy                                                     | Boraginaceae     | Acc      | Acc  | Acc  | Acc | Acc  | Acc  | Acc | 1        |   | 1 |   |   |   |   |   | P              | S      |            |            |
| <i>Echium wildpretii</i> H.Pearson ex Hook.f. subsp. <i>wildpretii</i>          | Boraginaceae     | Acc      | Acc  | NL   | NL  | Acc  | Acc  | NL  |          |   |   |   | 1 |   |   |   | T              | S      |            |            |
| <i>Eclipta prostrata</i> (L.) L.                                                | Asteraceae       | Acc      | Acc  | Acc  | Acc | Acc  | NL   | Acc | 107      |   |   |   |   | 1 |   |   |                |        | S          |            |
| <i>Ehrharta longifolia</i> Sm.                                                  | Asteraceae       | Acc      | Acc  | Acc  | Acc | Acc  | Acc  | Acc | 2        |   |   |   |   | 1 |   |   |                |        | S          |            |
| <i>Eleocharis multicaulis</i> (Sm.) Desv.                                       | Cyperaceae       | Acc      | Acc  | Acc  | Acc | Acc  | Acc  | Acc | 7        |   |   |   | 1 |   |   |   |                | P      |            |            |
| <i>Eleocharis palustris</i> (L.) Roem. & Schult.                                | Cyperaceae       | Acc      | Acc  | Acc  | Acc | Acc  | Acc  | Acc | 8        |   |   | 1 | 1 | 1 |   |   |                | P      |            |            |
| <i>Eleusine africana</i> Kenn.-O'Byrne                                          | Poaceae          | Syn      | NL   | Acc  | Acc | Acc  | Acc  | Acc | 2        |   | 1 |   |   |   |   |   |                |        | I          |            |
| <i>Eleusine indica</i> (L.) Gaertn. subsp. <i>indica</i>                        | Poaceae          | Acc      | Acc  | NL   | Syn | AmUn | Acc  | NL  |          |   | 1 | 1 | 1 | 1 | 1 |   |                |        | I          |            |
| <i>Eleusine tristachya</i> (Lam.) Lam.                                          | Poaceae          | Acc      | Acc  | Acc  | Acc | Acc  | Acc  | Acc | 9        |   | 1 |   |   |   |   |   |                |        | S          |            |
| <i>Elionurus royleanus</i> Nees ex A.Rich.                                      | Poaceae          | Acc      | Acc  | Acc  | Acc | Acc  | Acc  | Acc | 5        |   |   |   |   | 1 |   |   |                |        | S          |            |
| <i>Elodea canadensis</i> Michx.                                                 | Hydrocharitaceae | Acc      | Acc  | Acc  | Acc | Acc  | Acc  | Acc | 30       |   | 1 |   | 1 |   |   |   |                |        | I          |            |

| Species Name                                                           | Family       | Atlantis | Muer | POWO | WFO | COL  | GBIF | TRY | POWO Syn | H | P | G | T | C | F | L | Endemic Status | Native | Non native | Ornam Crop |
|------------------------------------------------------------------------|--------------|----------|------|------|-----|------|------|-----|----------|---|---|---|---|---|---|---|----------------|--------|------------|------------|
| <i>Elymus repens</i> (L.) Gould                                        | Poaceae      | Acc      | Acc  | Acc  | Acc | Acc  | Acc  | Acc | 7        |   |   |   | 1 | 1 |   |   |                | P      |            |            |
| <i>Enneapogon desvauxii</i> P.Beauv.                                   | Poaceae      | Acc      | Acc  | Acc  | Acc | Acc  | Acc  | Acc | 20       |   |   |   | 1 | 1 | 1 | 1 |                | P      |            |            |
| <i>Ensete ventricosum</i> (Welw.) Cheesman                             | Musaceae     | NL       | NL   | Acc  | Acc | Acc  | Acc  | Acc | 32       |   | 1 |   | 1 |   |   |   |                |        | S          | O          |
| <i>Ephedra altissima</i> Desf.                                         | Ephedraceae  | Acc      | Acc  | Acc  | Acc | Acc  | Acc  | Acc | 1        |   |   |   | 1 | 1 |   |   |                | S      |            |            |
| <i>Ephedra fragilis</i> Desf.                                          | Ephedraceae  | Acc      | Acc  | Acc  | Acc | Acc  | Acc  | Acc | 0        | 1 | 1 | 1 | 1 | 1 |   | 1 |                | S      |            |            |
| <i>Ephedra major</i> Host                                              | Ephedraceae  | Acc      | Acc  | Acc  | Acc | Acc  | Acc  | Acc | 9        |   | 1 |   | 1 |   |   |   |                | S      |            |            |
| <i>Epilobium angustifolium</i> L.                                      | Onagraceae   | Acc      | Syn  | Acc  | Acc | Acc  | Acc  | Acc | 40       |   |   |   | 1 |   |   |   |                |        | P          |            |
| <i>Epilobium ciliatum</i> Lehm.                                        | Onagraceae   | NL       | NL   | Acc  | Acc | Acc  | Acc  | Acc | 61       |   | 1 | 1 |   |   |   |   |                | P      |            |            |
| <i>Epilobium glandulosum</i> Lehm.                                     | Onagraceae   | Acc      | Acc  | Acc  | Syn | Syn  | Syn  | Syn | 24       |   |   |   |   | 1 |   |   |                |        | S          |            |
| <i>Epilobium hirsutum</i> L.                                           | Onagraceae   | Acc      | Acc  | Acc  | Acc | Acc  | Acc  | Acc | 19       |   | 1 | 1 | 1 |   |   |   |                | P      |            |            |
| <i>Epilobium obscurum</i> Schreb.                                      | Onagraceae   | Acc      | Acc  | Acc  | Acc | Acc  | Acc  | Acc | 18       |   |   |   | 1 |   |   |   |                | P      |            |            |
| <i>Epilobium palustre</i> L.                                           | Onagraceae   | Acc      | Acc  | Acc  | Acc | Acc  | Acc  | Acc | 53       |   |   |   | 1 |   |   |   |                | P      |            |            |
| <i>Epilobium parviflorum</i> Schreb.                                   | Onagraceae   | Acc      | Acc  | Acc  | Acc | Acc  | Acc  | Acc | 17       |   | 1 | 1 | 1 | 1 |   |   |                | P      |            |            |
| <i>Epilobium tetragonum</i> L. subsp. <i>tetragonum</i>                | Onagraceae   | Acc      | NL   | NL   | Syn | NL   | Acc  | NL  |          |   | 1 | 1 | 1 | 1 |   |   |                | P      |            |            |
| <i>Epilobium tetragonum</i> L. subsp. <i>lamyi</i> (F.W.Schultz) Nyman | Onagraceae   | Acc      | Syn  | NL   | Acc | Syn  | Syn  | Acc |          |   |   |   | 1 |   |   |   |                | P      |            |            |
| <i>Equisetum ramosissimum</i> Desf.                                    | Equisetaceae | Acc      | Acc  | Acc  | Acc | Acc  | Acc  | Acc | 1        |   | 1 | 1 | 1 | 1 |   |   |                | P      |            |            |
| <i>Eragrostis barrelieri</i> Daveau subsp. <i>barrelieri</i>           | Poaceae      | NL       | NL   | NL   | NL  | AmUn | Acc  | NL  |          | 1 | 1 | 1 | 1 | 1 | 1 | 1 |                | P      |            |            |
| <i>Eragrostis papposa</i> (Roem. & Schult.) Steud.                     | Poaceae      | Acc      | NL   | Acc  | Acc | Acc  | Acc  | Acc | 7        |   |   |   |   | 1 |   |   |                | P      |            |            |
| <i>Eragrostis virescens</i> J. Presl                                   | Poaceae      | Acc      | Acc  | Acc  | Acc | Acc  | Acc  | Acc | 11       |   | 1 |   | 1 | 1 |   |   |                | P      |            |            |
| <i>Erica canariensis</i> Rivas Mart., Martin Osorio & Wildpret         | Ericaceae    | Acc      | Syn  | Acc  | NL  | Acc  | NL   | Syn | 0        | 1 | 1 | 1 | 1 | 1 | 1 | 1 |                | S      |            |            |
| <i>Erica platycodon</i> L. subsp. <i>platycodon</i>                    | Ericaceae    | Acc      | NL   | Syn  | Syn | Acc  | Acc  | NL  | 1        | 1 |   | 1 | 1 |   |   |   | A              | S      |            |            |
| <i>Erigeron bonariensis</i> L.                                         | Asteraceae   | Acc      | Acc  | Acc  | Acc | Acc  | Acc  | Acc | 29       | 1 | 1 | 1 | 1 | 1 | 1 | 1 |                |        | S          |            |
| <i>Erigeron calderae</i> A.Hansen                                      | Asteraceae   | Acc      | Acc  | Acc  | Acc | Acc  | Acc  | Acc | 2        |   |   |   | 1 |   |   |   | T              | S      |            |            |

| Species Name                                                | Family       | Atlantis | Muer | POWO | WFO | COL  | GBIF | TRY | POWO Syn | H | P | G | T | C | F | L | Endemic Status | Native | Non native | Ornam Crop |
|-------------------------------------------------------------|--------------|----------|------|------|-----|------|------|-----|----------|---|---|---|---|---|---|---|----------------|--------|------------|------------|
| <i>Erigeron canadensis</i> L.                               | Asteraceae   | Acc      | Acc  | Acc  | Acc | Acc  | Acc  | Acc | 31       |   |   |   | 1 | 1 |   |   |                |        | S          |            |
| <i>Erigeron floribundus</i> (Kunth) Sch.Bip.                | Asteraceae   | NL       | Acc  | Acc  | Acc | Acc  | Acc  | Acc | 14       | 1 | 1 | 1 | 1 | 1 |   |   |                |        | S          |            |
| <i>Erigeron gouanii</i> L.                                  | Asteraceae   | Acc      | Acc  | Acc  | Acc | Syn  | Acc  | Acc | 15       |   | 1 | 1 | 1 | 1 |   |   |                |        | S          |            |
| <i>Erigeron karvinskianus</i> DC.                           | Asteraceae   | Acc      | Acc  | Acc  | Acc | Acc  | Acc  | Acc | 3        | 1 | 1 |   | 1 | 1 |   | 1 |                |        | I          | O          |
| <i>Erigeron sumatrensis</i> Retz.                           | Asteraceae   | Acc      | Acc  | Acc  | Acc | Acc  | Acc  | Acc | 21       |   |   | 1 | 1 | 1 | 1 | 1 |                |        | S          |            |
| <i>Eriobotrya japonica</i> (Thunb.) Lindl.                  | Rosaceae     | Acc      | Acc  | Acc  | Acc | Acc  | Acc  | Acc | 3        |   | 1 | 1 | 1 | 1 |   | 1 |                |        | S          | C          |
| <i>Erodium botrys</i> (Cav.) Bertol.                        | Geraniaceae  | Acc      | Acc  | Acc  | Acc | Acc  | Acc  | Acc | 4        | 1 | 1 | 1 | 1 | 1 | 1 | 1 |                | P      |            |            |
| <i>Erodium brachycarpum</i> (Godr.) Thell.                  | Geraniaceae  | Acc      | NL   | Acc  | Acc | Acc  | Acc  | Acc | 3        | 1 |   |   | 1 |   |   |   |                | P      |            |            |
| <i>Erodium chium</i> (Burm.f.) Willd.                       | Geraniaceae  | Acc      | Acc  | Acc  | Acc | Acc  | Acc  | Acc | 10       | 1 | 1 | 1 | 1 | 1 | 1 | 1 |                | P      |            |            |
| <i>Erodium ciconium</i> (L.) L'Hér.                         | Geraniaceae  | Acc      | Acc  | Acc  | Acc | Acc  | Acc  | Acc | 9        |   |   |   | 1 | 1 |   |   |                | P      |            |            |
| <i>Erodium cicutarium</i> (L.) L'Hér.                       | Geraniaceae  | Acc      | Acc  | Acc  | Acc | Acc  | Acc  | Acc | 41       | 1 | 1 | 1 | 1 | 1 | 1 | 1 |                | P      |            |            |
| <i>Erodium laciniatum</i> (Cav.) Willd.                     | Geraniaceae  | Acc      | Acc  | Acc  | Acc | Acc  | Acc  | Acc | 19       | 1 |   | 1 | 1 | 1 | 1 | 1 |                | P      |            |            |
| <i>Erodium malacoides</i> (L.) L'Hér.                       | Geraniaceae  | Acc      | Acc  | Acc  | Acc | Acc  | Acc  | Acc | 3        | 1 | 1 | 1 | 1 | 1 | 1 | 1 |                | P      |            |            |
| <i>Erodium maritimum</i> L'Hér.                             | Geraniaceae  | Acc      | Acc  | Acc  | Acc | Acc  | Acc  | Acc | 4        |   |   |   | 1 | 1 |   |   |                | P      |            |            |
| <i>Erodium moschatum</i> (L.) L'Hér.                        | Geraniaceae  | Acc      | Acc  | Acc  | Acc | Acc  | Acc  | Acc | 6        | 1 | 1 | 1 | 1 | 1 | 1 | 1 |                | P      |            |            |
| <i>Erodium neuradifolium</i> Delile ex Godr.                | Geraniaceae  | Acc      | Acc  | Acc  | Acc | Acc  | Acc  | Acc | 8        |   |   | 1 | 1 | 1 | 1 | 1 |                | P      |            |            |
| <i>Erodium pulverulentum</i> (Cav.) Willd.                  | Geraniaceae  | NL       | Acc  | Acc  | Syn | Syn  | Syn  | Syn | 8        |   |   |   |   |   | 1 | 1 |                | P      |            |            |
| <i>Erodium salzmännii</i> Delile                            | Geraniaceae  | NL       | Acc  | Acc  | Acc | Acc  | Acc  | Acc | 6        |   |   |   | 1 |   | 1 | 1 |                | P      |            |            |
| <i>Erodium touchyanum</i> Delile ex Godr.                   | Geraniaceae  | Acc      | Acc  | Acc  | Acc | Acc  | Acc  | Acc | 1        |   |   |   |   |   | 1 | 1 |                | P      |            |            |
| <i>Eruca vesicaria</i> (L.) Cav.                            | Brassicaceae | Acc      | Syn  | Acc  | Acc | Acc  | Acc  | Acc | 43       | 1 | 1 | 1 | 1 | 1 | 1 | 1 |                | P      |            |            |
| <i>Erucastrum canariense</i> Web & Berthel.                 | Brassicaceae | Acc      | Acc  | Acc  | Acc | Acc  | Acc  | Acc | 0        |   | 1 | 1 | 1 | 1 | 1 | 1 | A              | S      |            |            |
| <i>Erucastrum cardaminoides</i> (Webb ex Christ) O.E.Schulz | Brassicaceae | Acc      | Acc  | Acc  | Acc | Acc  | Acc  | Acc | 0        | 1 | 1 | 1 | 1 | 1 | 1 | 1 |                | S      |            |            |
| <i>Erysimum albescens</i> (Webb & Berthel.) Bramwell        | Brassicaceae | NL       | Acc  | Syn  | Acc | AmUn | Acc  | Syn |          |   |   |   |   | 1 |   |   | C              | S      |            |            |
| <i>Erysimum bicolor</i> (Hornem.) DC.                       | Brassicaceae | NL       | Acc  | Acc  | Acc | Acc  | Acc  | Acc | 12       | 1 | 1 | 1 | 1 | 1 | 1 |   | A              | S      |            |            |

| Species Name                                                                                           | Family       | Atlantis | Muer | POWO | WFO | COL | GBIF | TRY | POWO Syn | H | P | G | T | C | F | L | Endemic Status | Native | Non native | Ornam Crop |
|--------------------------------------------------------------------------------------------------------|--------------|----------|------|------|-----|-----|------|-----|----------|---|---|---|---|---|---|---|----------------|--------|------------|------------|
| <i>Erysimum scoparium</i> (Brouss. ex Willd.) Wettst.                                                  | Brassicaceae | Acc      | Acc  | Acc  | Acc | Acc | Acc  | Acc | 12       |   | 1 |   | 1 |   |   |   | A              | S      |            | O          |
| <i>Erysimum virescens</i> (Webb ex Christ) Wettst.                                                     | Brassicaceae | Acc      | NL   | Acc  | Syn | Syn | Syn  | Syn | 1        | 1 | 1 | 1 | 1 | 1 | 1 |   | A              | S      |            |            |
| <i>Erythrina crista-galli</i> L.                                                                       | Fabaceae     | NL       | NL   | Acc  | Acc | Acc | Acc  | Acc | 12       |   | 1 |   | 1 |   |   |   |                |        | S          | O          |
| <i>Erythrostemon gilliesii</i> (Hook.) Klotzsch                                                        | Fabaceae     | Syn      | Syn  | Acc  | Syn | Syn | Syn  | Acc | 4        |   |   | 1 | 1 | 1 | 1 | 1 |                |        | S          | O          |
| <i>Eschscholzia californica</i> Cham.                                                                  | Papaveraceae | Acc      | Acc  | Acc  | Acc | Acc | Acc  | Acc | 108      | 1 | 1 |   | 1 | 1 |   | 1 |                |        | I          | O          |
| <i>Espostoa melanostele</i> (Vaupel) Borg                                                              | Cactaceae    | Acc      | NL   | Acc  | Acc | Acc | Acc  | Acc | 9        |   |   |   | 1 |   |   |   |                |        | S          | O          |
| <i>Eucalyptus blakelyi</i> Maiden                                                                      | Myrtaceae    | Acc      | NL   | Acc  | Acc | Acc | Acc  | Acc | 2        |   |   |   |   | 1 |   |   |                |        | S          | O          |
| <i>Eucalyptus camaldulensis</i> Dehnh. subsp. <i>camaldulensis</i>                                     | Myrtaceae    | Acc      | NL   | Acc  | Syn | Acc | Acc  | NL  | 12       |   |   |   |   | 1 |   |   |                |        | S          | O          |
| <i>Eucalyptus camaldulensis</i> Dehnh. subsp. <i>acuta</i> Brooker & M.W. McDonald                     | Myrtaceae    | Acc      | NL   | Acc  | NL  | Acc | Acc  | NL  | 0        |   |   |   |   | 1 |   |   |                |        | S          | O          |
| <i>Eucalyptus camaldulensis</i> Dehnh. subsp. <i>arida</i> Brooker & M.W. McDonald                     | Myrtaceae    | Acc      | NL   | Acc  | NL  | Acc | Acc  | NL  | 0        |   |   |   | 1 | 1 |   |   |                |        | S          | O          |
| <i>Eucalyptus cladocalyx</i> F.Muell.                                                                  | Myrtaceae    | Acc      | NL   | Acc  | Acc | Acc | Acc  | Acc | 2        |   |   |   | 1 |   |   |   |                |        | S          | O          |
| <i>Eucalyptus conferruminata</i> D.J. Carr & S.G.M.Carr subsp. <i>recherche</i> D.Nicolle & M.E.French | Myrtaceae    | Acc      | NL   | Acc  | NL  | Acc | Acc  | NL  | 0        |   |   |   |   | 1 |   |   |                |        | S          | O          |
| <i>Eucalyptus cornuta</i> Labill.                                                                      | Myrtaceae    | Acc      | NL   | Acc  | Acc | Acc | Acc  | Acc | 1        |   |   |   |   | 1 |   |   |                |        | S          | O          |
| <i>Eucalyptus diversicolor</i> F.Muell.                                                                | Myrtaceae    | Acc      | NL   | Acc  | Acc | Acc | Acc  | Acc | 1        |   |   |   | 1 | 1 |   |   |                |        | S          | O          |
| <i>Eucalyptus dwyeri</i> Maiden & Blakely                                                              | Myrtaceae    | Acc      | NL   | Acc  | Acc | Acc | Acc  | Acc | 0        |   |   |   |   | 1 |   |   |                |        | S          | O          |
| <i>Eucalyptus globulus</i> Labill.                                                                     | Myrtaceae    | Acc      | Acc  | Acc  | Acc | Acc | Acc  | Acc | 0        | 1 | 1 | 1 | 1 | 1 |   | 1 |                |        | I          | O          |
| <i>Eucalyptus gomphocephala</i> A.Cunn. ex DC.                                                         | Myrtaceae    | Acc      | Acc  | Acc  | Acc | Acc | Acc  | Acc | 1        |   |   |   |   | 1 |   |   |                |        | S          | O          |
| <i>Eucalyptus lehmannii</i> (Schauer) Benth. subsp. <i>lehmannii</i>                                   | Myrtaceae    | Acc      | NL   | Acc  | Syn | Acc | Acc  | NL  | 0        |   |   |   |   | 1 |   |   |                |        | S          | O          |
| <i>Eucalyptus moluccana</i> Roxb.                                                                      | Myrtaceae    | Acc      | NL   | Acc  | Acc | Acc | Acc  | Acc | 2        |   |   |   |   | 1 |   |   |                |        | S          | O          |
| <i>Eucalyptus ovata</i> Labill.                                                                        | Myrtaceae    | Acc      | NL   | Acc  | Acc | Acc | Acc  | Acc | 1        |   |   |   |   | 1 |   |   |                |        | S          | O          |
| <i>Eucalyptus robusta</i> Sm.                                                                          | Myrtaceae    | Acc      | NL   | Acc  | Acc | Acc | Acc  | Acc | 4        |   |   |   | 1 | 1 |   |   |                |        | S          | O          |
| <i>Eucalyptus rudis</i> Endl.                                                                          | Myrtaceae    | NL       | Acc  | Acc  | Acc | Acc | Acc  | Acc | 0        |   |   |   |   | 1 |   |   |                |        | S          | O          |

| Species Name                                                              | Family          | Atlantis | Muer | POWO | WFO | COL  | GBIF | TRY | POWO Syn | H | P | G | T | C | F | L | Endemic Status | Native | Non native | Ornam Crop |
|---------------------------------------------------------------------------|-----------------|----------|------|------|-----|------|------|-----|----------|---|---|---|---|---|---|---|----------------|--------|------------|------------|
| <i>Eucalyptus sideroxylon</i> A.Cunn. ex Wools                            | Myrtaceae       | Acc      | NL   | Acc  | Acc | Acc  | Acc  | Acc | 3        |   |   |   |   | 1 |   |   |                |        | S          | O          |
| <i>Eucalyptus talyuberlup</i> D.J.Carr & S.G.M.Carr                       | Myrtaceae       | Acc      | NL   | Acc  | Acc | Acc  | Acc  | Acc | 0        |   |   |   |   | 1 |   |   |                |        | S          | O          |
| <i>Eucalyptus viminalis</i> Labill.                                       | Myrtaceae       | Acc      | Acc  | Acc  | Acc | Acc  | Acc  | Acc | 0        |   |   |   |   | 1 |   |   |                |        | S          | O          |
| <i>Eudianthe coeli-rosa</i> (L.) Fenzl ex Endl.                           | Caryophyllaceae | Syn      | Syn  | Acc  | Syn | Acc  | Acc  | Syn | 19       |   |   |   | 1 |   |   |   |                | P      |            |            |
| <i>Euphorbia aphylla</i> Brouss. ex Willd.                                | Euphorbiaceae   | Acc      | Acc  | Acc  | Acc | Acc  | Acc  | Acc | 2        |   |   | 1 | 1 | 1 |   |   | A              | S      |            |            |
| <i>Euphorbia atropurpurea</i> Brouss. ex Willd.                           | Euphorbiaceae   | Acc      | Acc  | Acc  | Acc | Acc  | Acc  | Acc | 2        |   |   |   | 1 |   |   |   | T              | S      |            |            |
| <i>Euphorbia balsamifera</i> Aiton subsp. <i>balsamifera</i>              | Euphorbiaceae   | Acc      | NL   | NL   | Syn | AmUn | Acc  | NL  |          | 1 | 1 | 1 | 1 | 1 | 1 | 1 |                | S      |            |            |
| <i>Euphorbia berthelotii</i> Bolle ex Boiss.                              | Euphorbiaceae   | Acc      | Acc  | Acc  | Acc | Acc  | Acc  | Acc | 1        |   |   | 1 |   |   |   |   | G              | S      |            |            |
| <i>Euphorbia bourgeana</i> J.Gay ex Boiss.                                | Euphorbiaceae   | Acc      | Acc  | Acc  | Acc | Acc  | Acc  | Acc | 1        |   |   | 1 | 1 |   |   |   | A              | S      |            |            |
| <i>Euphorbia bravoana</i> Svent.                                          | Euphorbiaceae   | Acc      | Acc  | Acc  | Acc | Acc  | Acc  | Acc | 0        |   |   | 1 |   |   |   |   | G              | S      |            |            |
| <i>Euphorbia calyptrata</i> Coss. & Kralik                                | Euphorbiaceae   | Acc      | Acc  | Acc  | Acc | Acc  | Acc  | Acc | 1        |   |   |   |   | 1 |   |   |                |        | P          |            |
| <i>Euphorbia canariensis</i> L.                                           | Euphorbiaceae   | Acc      | Acc  | Acc  | Acc | Acc  | Acc  | Acc | 4        | 1 | 1 | 1 | 1 | 1 | 1 |   | A              | S      |            |            |
| <i>Euphorbia chamaesyce</i> L.                                            | Euphorbiaceae   | Acc      | Acc  | Acc  | Acc | Acc  | Acc  | Acc | 21       |   |   | 1 | 1 | 1 | 1 |   |                | P      |            |            |
| <i>Euphorbia exigua</i> L.                                                | Euphorbiaceae   | Acc      | Acc  | Acc  | Acc | Acc  | Acc  | Acc | 2        |   | 1 |   | 1 | 1 | 1 | 1 |                |        | P          |            |
| <i>Euphorbia granulata</i> Forssk.                                        | Euphorbiaceae   | Acc      | Acc  | Acc  | Acc | Acc  | Acc  | Acc | 15       |   |   | 1 |   | 1 |   |   |                |        | P          |            |
| <i>Euphorbia handiensis</i> Burchard                                      | Euphorbiaceae   | Acc      | Acc  | Acc  | Acc | Acc  | Acc  | Acc | 0        |   |   |   |   |   | 1 |   | F              | S      |            |            |
| <i>Euphorbia helioscopia</i> L.                                           | Euphorbiaceae   | Acc      | Acc  | Acc  | Acc | Acc  | Acc  | Acc | 3        |   | 1 | 1 | 1 | 1 | 1 |   |                | P      |            |            |
| <i>Euphorbia heterophylla</i> L. var. <i>cyathophora</i> (Murray) Griseb. | Euphorbiaceae   | Syn      | Syn  | Acc  | Syn | Acc  | Acc  | NL  | 15       |   | 1 | 1 |   | 1 | 1 | 1 |                |        | P          | O          |
| <i>Euphorbia hirsuta</i> L.                                               | Euphorbiaceae   | Acc      | Acc  | Acc  | Acc | Acc  | Acc  | Acc | 22       |   |   |   | 1 | 1 | 1 |   |                |        | S          |            |
| <i>Euphorbia humifusa</i> Willd.                                          | Euphorbiaceae   | Acc      | Acc  | Acc  | Acc | Acc  | Acc  | Acc | 10       |   |   |   | 1 |   |   |   |                |        | P          |            |
| <i>Euphorbia hypericifolia</i> L.                                         | Euphorbiaceae   | Acc      | Acc  | Acc  | Acc | Acc  | Acc  | Acc | 8        |   | 1 |   | 1 | 1 |   |   |                |        | P          | O          |
| <i>Euphorbia inaequilatera</i> Sond.                                      | Euphorbiaceae   | Acc      | Acc  | Acc  | Acc | Acc  | Acc  | Acc | 13       |   |   |   | 1 |   |   |   |                |        | P          |            |
| <i>Euphorbia lamarckii</i> Sweet subsp. <i>lamarckii</i>                  | Euphorbiaceae   | Acc      | Acc  | NL   | NL  | AmUn | Acc  | NL  |          |   |   |   | 1 |   |   |   | T              | S      |            |            |
| <i>Euphorbia lathyris</i> L.                                              | Euphorbiaceae   | Acc      | Acc  | Acc  | Acc | Acc  | Acc  | Acc | 10       |   | 1 |   | 1 |   |   |   |                | P      |            |            |



| Species Name                                    | Family        | Atlantis | Muer | POWO | WFO | COL | GBIF | TRY | POWO Syn | H | P | G | T | C | F | L | Endemic Status | Native | Non native | Ornam Crop |
|-------------------------------------------------|---------------|----------|------|------|-----|-----|------|-----|----------|---|---|---|---|---|---|---|----------------|--------|------------|------------|
| <i>Euphorbia leucocephala</i> Lotsy             | Euphorbiaceae | NL       | NL   | Acc  | Acc | Acc | Acc  | Acc | 0        |   | 1 |   |   |   |   |   |                |        | S          | O          |
| <i>Euphorbia maculata</i> L.                    | Euphorbiaceae | Acc      | Acc  | Acc  | Acc | Acc | Acc  | Acc | 17       |   | 1 |   | 1 | 1 |   |   |                |        | S          | O          |
| <i>Euphorbia mellifera</i> Aiton                | Euphorbiaceae | Acc      | Acc  | Acc  | Acc | Acc | Acc  | Acc | 4        |   | 1 | 1 | 1 |   |   |   | A              | S      |            |            |
| <i>Euphorbia milii</i> Des Moul.                | Euphorbiaceae | Acc      | Acc  | Acc  | Acc | Acc | Acc  | Acc | 2        |   |   |   | 1 | 1 |   |   |                |        | S          | O          |
| <i>Euphorbia murielii</i> N.E.Br.               | Euphorbiaceae | NL       | NL   | Acc  | NL  | Syn | Syn  | Syn | 2        |   | 1 |   | 1 | 1 |   | 1 |                |        | S          | O          |
| <i>Euphorbia nutans</i> Lag.                    | Euphorbiaceae | Acc      | Acc  | Acc  | Acc | Acc | Acc  | Acc | 15       |   |   |   | 1 | 1 |   |   |                |        | P          |            |
| <i>Euphorbia paralias</i> L.                    | Euphorbiaceae | Acc      | Acc  | Acc  | Acc | Acc | Acc  | Acc | 6        |   |   | 1 | 1 | 1 | 1 | 1 |                | S      |            |            |
| <i>Euphorbia peplis</i> L.                      | Euphorbiaceae | Acc      | Acc  | Acc  | Acc | Acc | Acc  | NL  | 7        |   | 1 |   | 1 | 1 | 1 | 1 |                | P      |            |            |
| <i>Euphorbia platyphyllos</i> L.                | Euphorbiaceae | Acc      | Acc  | Acc  | Acc | Acc | Acc  | Acc | 2        |   |   |   | 1 | 1 |   |   |                | P      |            |            |
| <i>Euphorbia prostrata</i> Aiton                | Euphorbiaceae | Acc      | Acc  | Acc  | Acc | Acc | Acc  | Acc | 14       | 1 | 1 | 1 | 1 | 1 | 1 | 1 |                |        | S          |            |
| <i>Euphorbia pterococca</i> Brot.               | Euphorbiaceae | Acc      | Acc  | Acc  | Acc | Acc | Acc  | Acc | 4        | 1 |   |   | 1 | 1 |   |   |                |        | P          |            |
| <i>Euphorbia pulcherrima</i> Willd. ex Klotzsch | Euphorbiaceae | NL       | Acc  | Acc  | Acc | Acc | Acc  | Acc | 11       |   | 1 | 1 | 1 | 1 | 1 | 1 |                |        | S          | O          |
| <i>Euphorbia regis-jubae</i> J.Gay              | Euphorbiaceae | Acc      | Acc  | Acc  | Acc | Acc | Acc  | Acc | 8        |   |   |   |   | 1 | 1 | 1 |                | S      |            |            |
| <i>Euphorbia scordiifolia</i> Jacq.             | Euphorbiaceae | Acc      | Acc  | Acc  | Acc | Acc | Acc  | Acc | 5        | 1 |   |   |   |   |   |   |                |        | P          |            |
| <i>Euphorbia segetalis</i> L.                   | Euphorbiaceae | Acc      | Acc  | Acc  | Acc | Acc | Acc  | Acc | 2        |   | 1 |   | 1 |   |   | 1 |                | P      |            |            |
| <i>Euphorbia serpens</i> Kunth                  | Euphorbiaceae | Acc      | Acc  | Acc  | Acc | Acc | Acc  | Acc | 28       | 1 |   | 1 | 1 | 1 | 1 | 1 |                |        | P          |            |
| <i>Euphorbia serrata</i> L.                     | Euphorbiaceae | Acc      | Acc  | Acc  | Acc | Acc | Acc  | Acc | 8        |   |   |   | 1 | 1 | 1 | 1 |                | P      |            |            |
| <i>Euphorbia sulcata</i> Lens ex Loisel.        | Euphorbiaceae | Acc      | Acc  | Acc  | Acc | Acc | Acc  | Acc | 3        |   |   |   | 1 | 1 | 1 | 1 |                | P      |            |            |
| <i>Euphorbia taurinensis</i> All.               | Euphorbiaceae | Acc      | Acc  | Acc  | Acc | Acc | Acc  | Acc | 11       |   |   |   | 1 |   | 1 | 1 |                | P      |            |            |
| <i>Euphorbia terracina</i> L.                   | Euphorbiaceae | Acc      | Acc  | Acc  | Acc | Acc | Acc  | Acc | 36       | 1 | 1 | 1 | 1 | 1 | 1 | 1 |                | P      |            |            |
| <i>Euphorbia tirucalli</i> L.                   | Euphorbiaceae | NL       | NL   | Acc  | Acc | Acc | Acc  | Acc | 10       |   | 1 | 1 | 1 | 1 | 1 | 1 |                |        | S          | O          |
| <i>Euphorbia variabilis</i> Ces.                | Euphorbiaceae | Acc      | NL   | Acc  | Acc | Acc | Acc  | Acc | 1        |   |   |   | 1 |   | 1 |   |                | P      |            |            |
| <i>Euryops chrysanthemoides</i> (DC.) B.Nord.   | Asteraceae    | Acc      | NL   | Acc  | Acc | Acc | Acc  | Acc | 1        |   |   |   | 1 |   |   |   |                |        | S          | O          |
| <i>Fagopyrum esculentum</i> Moench              | Polygonaceae  | Acc      | Acc  | Acc  | Acc | Acc | Acc  | Acc | 22       |   |   |   |   | 1 |   |   |                |        | S          | C          |

| Species Name                                                              | Family       | Atlantis | Muer | POWO | WFO | COL | GBIF | TRY | POWO Syn | H | P | G | T | C | F | L | Endemic Status | Native | Non native | Ornam Crop |
|---------------------------------------------------------------------------|--------------|----------|------|------|-----|-----|------|-----|----------|---|---|---|---|---|---|---|----------------|--------|------------|------------|
| <i>Fallopia convolvulus</i> (L.) Å.Löve                                   | Polygonaceae | Acc      | Acc  | Acc  | Acc | Acc | Acc  | Acc | 19       | 1 | 1 | 1 | 1 | 1 |   |   |                |        | S          |            |
| <i>Farugium japonicum</i> (L.) Kitam.                                     | Asteraceae   | Acc      | Acc  | Acc  | Acc | Acc | Acc  | Acc | 16       |   | 1 |   |   | 1 |   |   |                |        | S          | O          |
| <i>Felicia amoena</i> (Sch.Bip.) Levyns                                   | Asteraceae   | NL       | NL   | Acc  | Acc | Acc | Acc  | Syn | 0        |   | 1 |   |   |   |   |   |                |        | S          |            |
| <i>Ferocactus herrerae</i> J.G.Ortega                                     | Cactaceae    | Acc      | NL   | NL   | Acc | Syn | Acc  | Syn | 2        |   |   |   |   | 1 |   | 1 |                |        | S          | O          |
| <i>Ferraria crispa</i> Burm.                                              | Iridaceae    | Acc      | Acc  | Acc  | Acc | Acc | Acc  | Acc | 8        | 1 | 1 |   |   |   |   |   |                |        | S          | O          |
| <i>Ferula arnoldiana</i> S.Scholz & Reyes-Bet.                            | Apiaceae     | Acc      | Acc  | Acc  | NL  | Acc | Acc  | NL  | 0        |   |   |   |   |   | 1 |   | F              | S      |            |            |
| <i>Ferula communis</i> L. subsp. <i>linkii</i> (Webb) Reduron & Dobignard | Apiaceae     | Syn      | Syn  | Acc  | Acc | Acc | Acc  | Acc | 1        | 1 | 1 | 1 | 1 | 1 |   |   | A              | S      |            |            |
| <i>Ferula lancerotensis</i> Parl. ex Hartung                              | Apiaceae     | Acc      | Syn  | Acc  | Acc | Acc | Acc  | Syn | 0        |   |   |   |   |   | 1 | 1 | A              | S      |            |            |
| <i>Ferula latipinna</i> A.Santos                                          | Apiaceae     | Acc      | Acc  | Acc  | Acc | Acc | Acc  | NL  | 0        |   | 1 | 1 |   |   |   |   | A              | S      |            |            |
| <i>Festuca agustini</i> Linding.                                          | Poaceae      | Acc      | Acc  | Acc  | Acc | Acc | Acc  | Acc | 3        | 1 | 1 | 1 | 1 | 1 |   |   | A              | S      |            |            |
| <i>Festuca alopecuroides</i> Schousb.                                     | Poaceae      | Syn      | Acc  | Acc  | Syn | Syn | Syn  | Syn | 9        |   |   |   | 1 | 1 |   |   |                | P      |            |            |
| <i>Festuca ambigua</i> Le Gall                                            | Poaceae      | Syn      | NL   | Acc  | Syn | Syn | Acc  | Syn | 15       | 1 |   |   | 1 |   |   | 1 |                | P      |            |            |
| <i>Festuca bromoides</i> L.                                               | Poaceae      | Syn      | Acc  | Acc  | Syn | Syn | Syn  | Syn | 22       | 1 | 1 | 1 | 1 | 1 | 1 |   |                | P      |            |            |
| <i>Festuca geniculata</i> (L.) Lag. & Rodr.                               | Poaceae      | Syn      | Acc  | Acc  | Syn | Syn | Syn  | Syn | 12       |   |   |   |   | 1 |   |   |                | P      |            |            |
| <i>Festuca maritima</i> L.                                                | Poaceae      | Syn      | Syn  | Acc  | Syn | Syn | Acc  | Syn | 48       |   | 1 |   |   |   |   |   |                |        | P          |            |
| <i>Festuca membranacea</i> (L.) Druce                                     | Poaceae      | Syn      | Acc  | Acc  | Syn | Syn | Acc  | Syn | 11       | 1 |   |   |   | 1 |   |   |                | P      |            |            |
| <i>Festuca muralis</i> Kunth                                              | Poaceae      | Syn      | Acc  | Acc  | Syn | Syn | Acc  | Syn | 6        | 1 | 1 | 1 |   | 1 | 1 |   |                | P      |            |            |
| <i>Festuca myuros</i> L. subsp. <i>myuros</i>                             | Poaceae      | NL       | NL   | NL   | NL  | NL  | Syn  | NL  |          | 1 | 1 | 1 | 1 | 1 | 1 | 1 |                | P      |            |            |
| <i>Festuca rubra</i> L.                                                   | Poaceae      | Acc      | Acc  | Acc  | Acc | Acc | Acc  | Acc | 144      |   | 1 |   |   | 1 |   |   |                | P      |            |            |
| <i>Ficus carica</i> L.                                                    | Moraceae     | Acc      | Acc  | Acc  | Acc | Acc | NL   | Acc | 29       | 1 | 1 | 1 | 1 | 1 | 1 | 1 |                |        | P          | C          |
| <i>Ficus elastica</i> Roxb. ex Hornem.                                    | Moraceae     | NL       | NL   | Acc  | Acc | Acc | Acc  | Acc | 12       |   | 1 | 1 | 1 | 1 | 1 | 1 |                |        | S          | O          |
| <i>Ficus microcarpa</i> L.f.                                              | Moraceae     | Acc      | Acc  | Acc  | Acc | Acc | Acc  | Acc | 24       |   | 1 | 1 | 1 | 1 |   |   |                |        | S          | O          |
| <i>Ficus rubiginosa</i> Desf. ex Vent.                                    | Moraceae     | NL       | Acc  | Acc  | Acc | Acc | Acc  | Acc | 25       |   | 1 |   | 1 | 1 |   |   |                |        | S          | O          |
| <i>Filago arvensis</i> L.                                                 | Asteraceae   | Acc      | Acc  | Acc  | Acc | Syn | Acc  | Acc | 24       |   |   |   |   | 1 |   |   |                | P      |            |            |

| Species Name                                                                                                  | Family        | Atlantis | Muer | POWO | WFO  | COL | GBIF | TRY | POWO Syn | H | P | G | T | C | F | L | Endemic Status | Native | Non native | Ornam Crop |
|---------------------------------------------------------------------------------------------------------------|---------------|----------|------|------|------|-----|------|-----|----------|---|---|---|---|---|---|---|----------------|--------|------------|------------|
| <i>Filago desertorum</i> Pomel                                                                                | Asteraceae    | Acc      | Acc  | Acc  | Acc  | Acc | Acc  | Acc | 2        |   |   |   | 1 | 1 | 1 | 1 |                | P      |            |            |
| <i>Filago germanica</i> (L.) Huds.                                                                            | Asteraceae    | Acc      | Syn  | Acc  | Acc  | Syn | Acc  | Acc | 7        | 1 | 1 | 1 | 1 | 1 | 1 | 1 |                | P      |            |            |
| <i>Filago lutescens</i> Jord. subsp. <i>atlantica</i> Wagenitz                                                | Asteraceae    | Acc      | NL   | Acc  | Acc  | Acc | Acc  | NL  | 3        | 1 |   |   | 1 | 1 |   | 1 |                | P      |            |            |
| <i>Filago pygmaea</i> L.                                                                                      | Asteraceae    | Acc      | Acc  | Acc  | Acc  | Acc | Acc  | Acc | 1        | 1 |   |   | 1 | 1 |   | 1 |                | P      |            |            |
| <i>Filago pyramidata</i> L.                                                                                   | Asteraceae    | Acc      | Acc  | Acc  | Acc  | Acc | Acc  | Acc | 28       | 1 | 1 | 1 | 1 | 1 | 1 | 1 |                | P      |            |            |
| <i>Fimbristylis bisumbellata</i> (Forssk.) Bubani                                                             | Cyperaceae    | Acc      | Acc  | Acc  | Acc  | Acc | Acc  | Acc | 8        |   |   |   | 1 | 1 |   |   |                | P      |            |            |
| <i>Fimbristylis ferruginea</i> (L.) Vahl                                                                      | Cyperaceae    | Acc      | Acc  | Acc  | Acc  | Acc | Acc  | Acc | 40       |   |   |   | 1 | 1 |   |   |                |        | P          |            |
| <i>Fimbristylis turkestanica</i> (Regel) B.Fedtsch.                                                           | Cyperaceae    | Acc      | NL   | Acc  | Acc  | Acc | Acc  | Acc | 4        |   |   |   | 1 | 1 |   |   |                |        | P          |            |
| <i>Foeniculum vulgare</i> Mill. subsp. <i>vulgare</i>                                                         | Apiaceae      | Acc      | NL   | NL   | NL   | Syn | Acc  | Acc |          | 1 | 1 | 1 | 1 | 1 | 1 | 1 |                | P      |            | C          |
| <i>Forsskaolea angustifolia</i> Retz.                                                                         | Urticaceae    | Acc      | Acc  | Acc  | Acc  | Acc | Acc  | Acc | 2        | 1 | 1 | 1 | 1 | 1 | 1 | 1 | A              | S      |            |            |
| <i>Fragaria vesca</i> L.                                                                                      | Rosaceae      | Acc      | Acc  | Acc  | AmUn | Acc | Acc  | Acc | 29       | 1 |   |   | 1 |   |   |   |                |        | S          | C          |
| <i>Frankenia boissieri</i> Reut. ex Boiss.                                                                    | Frankeniaceae | Acc      | Acc  | Acc  | Acc  | Acc | Acc  | Acc | 1        |   |   |   |   | 1 | 1 | 1 |                | S      |            |            |
| <i>Frankenia ericifolia</i> C.Sm. ex DC. subsp. <i>ericifolia</i>                                             | Frankeniaceae | Acc      | Acc  | NL   | NL   | Acc | Acc  | NL  |          | 1 | 1 | 1 | 1 | 1 | 1 | 1 |                | S      |            |            |
| <i>Frankenia ericifolia</i> C.Sm. ex DC. subsp. <i>latifolia</i> (Webb & Berthel.) Brochmann, Lobin & Sunding | Frankeniaceae | Acc      | Acc  | Acc  | Acc  | Acc | Acc  | NL  | 1        |   | 1 |   | 1 |   |   |   | A              | S      |            |            |
| <i>Frankenia hirsuta</i> L.                                                                                   | Frankeniaceae | Syn      | Syn  | Acc  | Acc  | Acc | Acc  | Acc | 18       | 1 | 1 | 1 | 1 | 1 | 1 | 1 |                | S      |            |            |
| <i>Frankenia pulverulenta</i> L.                                                                              | Frankeniaceae | Acc      | Acc  | Acc  | Acc  | Acc | Acc  | Acc | 8        | 1 |   |   | 1 | 1 | 1 | 1 |                | P      |            |            |
| <i>Fraxinus angustifolia</i> Vahl.                                                                            | Oleaceae      | NL       | NL   | Acc  | Acc  | Acc | Acc  | Acc | 0        |   | 1 |   |   |   |   |   |                |        | P          |            |
| <i>Freesia refracta</i> (Jacq.) Klatt                                                                         | Iridaceae     | Acc      | Acc  | Acc  | Acc  | Acc | Acc  | Acc | 9        |   |   |   |   | 1 |   |   |                |        | S          | O          |
| <i>Fuchsia boliviana</i> Carrière                                                                             | Onagraceae    | Acc      | Acc  | Acc  | Acc  | Acc | Acc  | Acc | 5        |   |   |   | 1 | 1 |   |   |                |        | S          | O          |
| <i>Fuchsia coccinea</i> Aiton                                                                                 | Onagraceae    | Acc      | Acc  | Acc  | Acc  | Acc | Acc  | Acc | 5        |   |   |   | 1 |   |   |   |                |        | S          | O          |
| <i>Fumaria agraria</i> Lag.                                                                                   | Papaveraceae  | Acc      | Acc  | Acc  | Acc  | Acc | Acc  | Acc | 1        |   |   |   |   | 1 |   |   |                |        | P          |            |
| <i>Fumaria bastardii</i> Boreau                                                                               | Papaveraceae  | Acc      | Acc  | Acc  | Acc  | Acc | Acc  | Acc | 14       | 1 | 1 | 1 | 1 | 1 | 1 | 1 |                | P      |            |            |
| <i>Fumaria capreolata</i> L.                                                                                  | Papaveraceae  | Acc      | Acc  | Acc  | Acc  | Acc | Acc  | Acc | 13       |   | 1 |   | 1 | 1 | 1 | 1 |                |        | P          |            |
| <i>Fumaria coccinea</i> R.T.Lowe ex Pugsley                                                                   | Papaveraceae  | Acc      | Acc  | Acc  | Acc  | Acc | Acc  | Acc | 0        | 1 | 1 | 1 | 1 | 1 | 1 | 1 | A              | S      |            |            |

| Species Name                                                                    | Family       | Atlantis | Muer | POWO | WFO | COL | GBIF | TRY | POWO Syn | H | P | G | T | C | F | L | Endemic Status | Native | Non native | Ornam Crop |
|---------------------------------------------------------------------------------|--------------|----------|------|------|-----|-----|------|-----|----------|---|---|---|---|---|---|---|----------------|--------|------------|------------|
| <i>Fumaria montana</i> J.A.Schmidt                                              | Papaveraceae | Acc      | Acc  | Acc  | Acc | Acc | Acc  | Acc | 1        | 1 | 1 | 1 | 1 | 1 | 1 | 1 |                | S      |            |            |
| <i>Fumaria muralis</i> Sond. ex W.D.J.Koch subsp. <i>muralis</i>                | Papaveraceae | Acc      | NL   | NL   | NL  | Acc | Acc  | Acc |          | 1 | 1 | 1 | 1 | 1 | 1 | 1 |                | P      |            |            |
| <i>Fumaria muralis</i> Sond. ex W.D.J.Koch subsp. <i>boraei</i> (Jord.) Pugsley | Papaveraceae | Acc      | Syn  | Acc  | Acc | Acc | Acc  | Acc | 3        |   |   | 1 |   | 1 |   |   |                | P      |            |            |
| <i>Fumaria officinalis</i> L.                                                   | Papaveraceae | Acc      | Acc  | Acc  | Acc | Acc | Acc  | Acc | 8        |   | 1 |   |   | 1 | 1 | 1 |                | P      |            |            |
| <i>Fumaria parviflora</i> Lam.                                                  | Papaveraceae | Acc      | Acc  | Acc  | Acc | Acc | Acc  | Acc | 10       | 1 |   | 1 | 1 | 1 | 1 | 1 |                |        | P          |            |
| <i>Fumaria vaillantii</i> Loisel.                                               | Papaveraceae | Acc      | Acc  | Acc  | Acc | Acc | Acc  | Acc | 7        |   |   |   | 1 | 1 | 1 | 1 |                | P      |            |            |
| <i>Furcraea foetida</i> (L.) Haw.                                               | Agavaceae    | Acc      | Acc  | Acc  | Acc | Acc | Acc  | Acc | 11       |   | 1 |   | 1 | 1 | 1 |   |                |        | I          | O          |
| <i>Furcraea hexapetala</i> (Jacq.) Urb.                                         | Asparagaceae | Acc      | NL   | Acc  | Acc | Acc | Acc  | Acc | 13       |   |   |   | 1 |   |   |   |                |        | I          | O          |
| <i>Furcraea selloana</i> Koch                                                   | Asparagaceae | Acc      | NL   | Acc  | Acc | Acc | Acc  | Syn | 1        |   |   |   | 1 | 1 |   |   |                |        | I          | O          |
| <i>Galactites tomentosus</i> Moench                                             | Asteraceae   | Acc      | Acc  | Acc  | Acc | Acc | Acc  | Acc | 17       | 1 | 1 | 1 | 1 | 1 |   |   |                | P      |            |            |
| <i>Galinsoga parviflora</i> Cav.                                                | Asteraceae   | Acc      | Acc  | Acc  | Acc | Acc | Acc  | Acc | 18       |   | 1 | 1 | 1 | 1 |   |   |                |        | S          |            |
| <i>Galinsoga quadriradiata</i> Ruiz & Pav.                                      | Asteraceae   | Acc      | Acc  | Acc  | Acc | Acc | Acc  | Acc | 30       |   | 1 | 1 | 1 | 1 |   |   |                |        | S          |            |
| <i>Galium aparine</i> L.                                                        | Rubiaceae    | Acc      | Acc  | Acc  | Acc | Acc | Acc  | Acc | 26       | 1 | 1 | 1 | 1 | 1 | 1 | 1 |                | P      |            |            |
| <i>Galium aschenbornii</i> Schauer                                              | Rubiaceae    | Syn      | Syn  | Acc  | Acc | Acc | Acc  | Acc | 7        | 1 |   |   |   |   | 1 |   |                | P      |            |            |
| <i>Galium elongatum</i> C. Presl                                                | Rubiaceae    | Acc      | Acc  | Acc  | Acc | Acc | Acc  | Acc | 2        |   |   |   | 1 |   |   |   |                | P      |            |            |
| <i>Galium murale</i> (L.) All.                                                  | Rubiaceae    | Acc      | Acc  | Acc  | Acc | Acc | Acc  | Acc | 10       | 1 | 1 | 1 | 1 | 1 | 1 | 1 |                | P      |            |            |
| <i>Galium parisiense</i> L.                                                     | Rubiaceae    | Acc      | Acc  | Acc  | Acc | Acc | Acc  | Acc | 24       | 1 | 1 | 1 | 1 | 1 | 1 | 1 |                | P      |            |            |
| <i>Galium scabrum</i> L.                                                        | Rubiaceae    | Acc      | Acc  | Acc  | Acc | Acc | Acc  | Acc | 4        | 1 | 1 | 1 | 1 | 1 | 1 |   |                | P      |            |            |
| <i>Galium setaceum</i> Lam.                                                     | Rubiaceae    | Acc      | Acc  | Acc  | Acc | Acc | Acc  | Acc | 9        |   | 1 | 1 | 1 | 1 | 1 | 1 |                | P      |            |            |
| <i>Galium spurium</i> L.                                                        | Rubiaceae    | Acc      | Acc  | Acc  | Acc | Acc | Acc  | Acc | 2        | 1 |   |   | 1 | 1 |   | 1 |                | P      |            |            |
| <i>Galium tricornutum</i> Dandy                                                 | Rubiaceae    | Acc      | Acc  | Acc  | Acc | Acc | Acc  | Acc | 6        |   | 1 | 1 | 1 | 1 | 1 | 1 |                | P      |            |            |
| <i>Galium verrucosum</i> Huds.                                                  | Rubiaceae    | Acc      | Acc  | Acc  | Acc | Acc | Acc  | Acc | 13       | 1 | 1 | 1 | 1 | 1 |   |   |                | P      |            |            |
| <i>Gamochaeta antillana</i> (Urb.) Anderb.                                      | Asteraceae   | Acc      | Acc  | Acc  | Syn | NL  | Acc  | Syn | 3        | 1 | 1 |   | 1 |   |   |   |                |        | S          |            |

| Species Name                                          | Family         | Atlantis | Muer | POWO | WFO  | COL  | GBIF | TRY | POWO Syn | H | P | G | T | C | F | L | Endemic Status | Native | Non native | Ornam Crop |
|-------------------------------------------------------|----------------|----------|------|------|------|------|------|-----|----------|---|---|---|---|---|---|---|----------------|--------|------------|------------|
| <i>Gamochaeta pensylvanica</i> (Willd.) Cabrera       | Asteraceae     | Acc      | Acc  | Acc  | Syn  | Acc  | Acc  | Syn | 6        | 1 | 1 |   | 1 | 1 | 1 |   |                |        | S          |            |
| <i>Gastridium phleoides</i> (Nees & Meyen) C.E.Hubb.  | Poaceae        | Acc      | Acc  | Acc  | Acc  | Acc  | Acc  | Acc | 4        | 1 | 1 |   |   |   | 1 |   |                | P      |            |            |
| <i>Gastridium ventricosum</i> (Gouan) Schinz & Thell. | Poaceae        | Acc      | Acc  | Acc  | Acc  | Acc  | Acc  | Acc | 25       |   | 1 | 1 | 1 | 1 | 1 | 1 |                | P      |            |            |
| <i>Gaudinia fragilis</i> (L.) P.Beauv.                | Poaceae        | Acc      | Acc  | Acc  | Acc  | Acc  | Acc  | Acc | 24       |   |   |   | 1 | 1 |   |   |                | P      |            |            |
| <i>Gazania rigens</i> (L.) Gaertn.                    | Asteraceae     | Acc      | Acc  | Acc  | Acc  | Acc  | Acc  | Acc | 9        |   | 1 |   | 1 |   |   |   |                |        | S          | O          |
| <i>Genista benehoavensis</i> (Bolle) del Arco         | Fabaceae       | Acc      | Acc  | Syn  | AmUn | AmUn | Syn  | NL  |          |   | 1 |   |   |   |   |   | P              | S      |            |            |
| <i>Gennaria diphylla</i> (Link) Parl.                 | Orchidaceae    | Acc      | Acc  | Acc  | Acc  | Acc  | Acc  | Acc | 12       | 1 | 1 | 1 | 1 | 1 |   | 1 |                | P      |            |            |
| <i>Geranium dissectum</i> L.                          | Geraniaceae    | Acc      | Acc  | Acc  | Acc  | Acc  | Acc  | Acc | 9        | 1 | 1 | 1 | 1 | 1 |   |   |                | P      |            |            |
| <i>Geranium molle</i> L.                              | Geraniaceae    | Acc      | Acc  | Acc  | Acc  | Acc  | Acc  | Acc | 10       | 1 | 1 | 1 | 1 | 1 | 1 | 1 |                | P      |            |            |
| <i>Geranium purpureum</i> Vill.                       | Geraniaceae    | Acc      | Acc  | Acc  | Acc  | Acc  | Acc  | Acc | 3        | 1 | 1 | 1 | 1 | 1 |   | 1 |                | P      |            |            |
| <i>Geranium pyrenaicum</i> Burm.f.                    | Geraniaceae    | NL       | NL   | Acc  | Acc  | Acc  | Acc  | Acc | 10       | 1 | 1 | 1 | 1 | 1 | 1 | 1 |                | P      |            |            |
| <i>Geranium reuteri</i> Aedo & Munoz Garm.            | Geraniaceae    | Acc      | Acc  | Acc  | Acc  | Acc  | Acc  | Acc | 1        | 1 | 1 | 1 | 1 | 1 |   |   | A              | S      |            |            |
| <i>Geranium robertianum</i> L.                        | Geraniaceae    | Acc      | Acc  | Acc  | Acc  | Acc  | Acc  | Acc | 17       | 1 | 1 | 1 | 1 | 1 |   |   |                | P      |            |            |
| <i>Geranium rotundifolium</i> L.                      | Geraniaceae    | Acc      | Acc  | Acc  | Acc  | Acc  | Acc  | Acc | 9        | 1 | 1 | 1 | 1 | 1 | 1 | 1 |                | P      |            |            |
| <i>Geropogon hybridus</i> (L.) Sch.Bip.               | Asteraceae     | Acc      | Acc  | Acc  | Acc  | Acc  | Acc  | Acc | 6        |   | 1 | 1 | 1 |   |   |   |                | P      |            |            |
| <i>Gesnouinia arborea</i> (L.f.) Gaudich.             | Urticaceae     | Acc      | Acc  | Acc  | Acc  | Acc  | Acc  | Acc | 4        | 1 | 1 | 1 | 1 | 1 |   |   | A              | S      |            |            |
| <i>Gladiolus italicus</i> Mill.                       | Iridaceae      | Acc      | Acc  | Acc  | Acc  | Acc  | Acc  | Acc | 19       | 1 | 1 | 1 | 1 | 1 | 1 | 1 |                | P      |            |            |
| <i>Glaucium corniculatum</i> (L.) Rudolph             | Papaveraceae   | Acc      | Acc  | Acc  | Acc  | Acc  | Acc  | Acc | 16       |   | 1 | 1 | 1 | 1 | 1 | 1 |                |        | P          |            |
| <i>Glaucium flavum</i> (Sm.) Fedde                    | Papaveraceae   | Acc      | Acc  | Acc  | Acc  | Acc  | Acc  | Acc | 15       |   | 1 |   | 1 | 1 | 1 | 1 |                |        | P          |            |
| <i>Glebionis coronaria</i> (L.) Cass. Ex Spach        | Asteraceae     | Acc      | Acc  | Acc  | Acc  | Acc  | Acc  | Acc | 19       | 1 | 1 | 1 | 1 | 1 | 1 | 1 |                |        | P          |            |
| <i>Glebionis segetum</i> (L.) Fourr.                  | Asteraceae     | Acc      | Acc  | Acc  | Acc  | Acc  | Acc  | Acc | 13       |   |   | 1 | 1 | 1 |   |   |                |        | P          |            |
| <i>Gleditsia triacanthos</i> L.                       | Fabaceae       | Acc      | Acc  | Acc  | Acc  | Acc  | Acc  | Acc | 23       |   |   |   |   | 1 |   |   |                |        | S          | O          |
| <i>Glinus lotoides</i> L.                             | Molluginaceae  | Acc      | NL   | Acc  | Acc  | Acc  | Acc  | Acc | 16       |   |   |   |   |   |   |   |                | P      |            |            |
| <i>Globularia ascanii</i> Bramwell & Kunkel           | Plantaginaceae | Acc      | Acc  | Acc  | Acc  | Acc  | Acc  | NL  | 0        |   |   |   |   | 1 |   |   | C              | S      |            |            |

| Species Name                                                                       | Family          | Atlantis | Muer | POWO | WFO  | COL  | GBIF | TRY | POWO Syn | H | P | G | T | C | F | L | Endemic Status | Native | Non native | Ornam Crop |
|------------------------------------------------------------------------------------|-----------------|----------|------|------|------|------|------|-----|----------|---|---|---|---|---|---|---|----------------|--------|------------|------------|
| <i>Globularia salicina</i> Lam.                                                    | Plantaginaceae  | Acc      | Acc  | Acc  | Acc  | Acc  | Acc  | Acc | 3        | 1 | 1 | 1 | 1 | 1 |   |   |                | S      |            |            |
| <i>Globularia sarcophylla</i> Svent.                                               | Plantaginaceae  | Acc      | Acc  | Acc  | Acc  | Acc  | Acc  | NL  | 0        |   |   |   |   | 1 |   |   | C              | S      |            |            |
| <i>Glyceria declinata</i> Breb.                                                    | Poaceae         | Acc      | Acc  | Acc  | Acc  | Acc  | Acc  | Acc | 5        |   |   |   |   | 1 |   |   |                |        | P          |            |
| <i>Gnidia polystachya</i> P.J.Bergius                                              | Thymelaeaceae   | Acc      | Acc  | Acc  | Acc  | AmUn | Syn  | Syn | 5        |   |   |   | 1 |   |   |   |                |        | S          | O          |
| <i>Gomphocarpus fruticosus</i> (L.) W.T.Aiton                                      | Apocynaceae     | Acc      | Acc  | Acc  | Acc  | Acc  | Acc  | Acc | 1        | 1 | 1 | 1 | 1 | 1 | 1 | 1 |                |        | S          | O          |
| <i>Gonospermum canariense</i> (DC.) Less. subsp. <i>canariense</i>                 | Asteraceae      | NL       | Acc  | Acc  | NL   | Acc  | Acc  | NL  | 4        |   | 1 |   |   |   |   |   | P              | S      |            |            |
| <i>Gonospermum canariense</i> (DC.) Less. subsp. <i>elegans</i>                    | Asteraceae      | NL       | Acc  | NL   | NL   | Acc  | Acc  | NL  |          | 1 |   |   |   |   |   |   | H              | S      |            |            |
| <i>Gonospermum ferulaceum</i> (Webb) Febles var. <i>ferulaceum</i>                 | Asteraceae      | NL       | Acc  | NL   | Syn  | AmUn | Syn  | NL  |          |   |   |   |   | 1 |   |   | C              | S      |            |            |
| <i>Gonospermum ferulaceum</i> (Webb) Febles var. <i>latipinnum</i> (Svent.) Febles | Asteraceae      | NL       | Acc  | Acc  | NL   | Acc  | Acc  | NL  | 2        |   |   |   |   | 1 |   |   | C              | S      |            |            |
| <i>Gonospermum fruticosum</i> Less.                                                | Asteraceae      | Acc      | Acc  | Acc  | Acc  | Acc  | Acc  | Acc | 1        | 1 | 1 | 1 | 1 |   |   |   | A              | S      |            |            |
| <i>Gonospermum gomerae</i> Bolle                                                   | Asteraceae      | Acc      | Acc  | Acc  | Acc  | Acc  | Acc  | Acc | 0        |   |   | 1 |   |   |   |   | G              | S      |            |            |
| <i>Gonospermum oshanahanii</i> (Marrero Rodr., Febles & C.Suarez) Febles           | Asteraceae      | Acc      | Acc  | Acc  | AmUn | Acc  | Acc  | NL  | 1        |   |   |   |   | 1 |   |   | C              | S      |            |            |
| <i>Gonospermum ptarmiciflorum</i> (Webb & Berthel.) Febles                         | Asteraceae      | Acc      | Acc  | Acc  | AmUn | Acc  | Acc  | NL  | 3        |   |   |   |   | 1 |   |   | C              | S      |            |            |
| <i>Gonospermum revolutum</i> (C.Sm. ex Buch) Sch.Bip.                              | Asteraceae      | Acc      | Acc  | Acc  | Acc  | Acc  | Acc  | Acc | 2        |   |   |   | 1 |   |   |   | T              | S      |            |            |
| <i>Gossypium barbadense</i> L.                                                     | Malvaceae       | NL       | Acc  | Acc  | Acc  | Acc  | Acc  | Acc | 71       |   |   |   |   | 1 |   |   |                |        | S          | O          |
| <i>Gossypium herbaceum</i> L.                                                      | Malvaceae       | Acc      | Acc  | Acc  | Acc  | Acc  | Acc  | Acc | 32       | 1 |   | 1 |   |   | 1 |   |                |        | S          | O          |
| <i>Grammitis quaerenda</i> Bolle                                                   | Polypodiaceae   | Acc      | NL   | Acc  | AmUn | NL   | Acc  | NL  | 0        |   |   |   | 1 |   |   |   |                | S      |            |            |
| <i>Graptopetalum paraguayense</i> (N.E.Br.) E.Walther                              | Crassulaceae    | Acc      | Acc  | Acc  | Acc  | Acc  | Acc  | NL  | 6        |   |   |   | 1 | 1 |   |   |                |        | S          | O          |
| <i>Grevillea robusta</i> A.Cunn ex. R.Br.                                          | Proteaceae      | Acc      | Acc  | Acc  | Acc  | Acc  | Acc  | Acc | 6        |   | 1 |   | 1 | 1 |   |   |                |        | S          | O          |
| <i>Guizotia abyssinica</i> (L.f.) Casse                                            | Asteraceae      | Acc      | Acc  | Acc  | Acc  | Acc  | Acc  | Acc | 17       |   | 1 |   | 1 | 1 |   |   |                |        | S          | O          |
| <i>Gymnocarpus decander</i> Forssk.                                                | Caryophyllaceae | Syn      | Syn  | Acc  | Acc  | Acc  | Acc  | Acc | 7        |   |   | 1 | 1 | 1 | 1 | 1 |                | S      |            |            |

| Species Name                                                 | Family           | Atlantis | Muer | POWO | WFO  | COL  | GBIF | TRY | POWO Syn | H | P | G | T | C | F | L | Endemic Status | Native | Non native | Ornam Crop |
|--------------------------------------------------------------|------------------|----------|------|------|------|------|------|-----|----------|---|---|---|---|---|---|---|----------------|--------|------------|------------|
| <i>Gymnocarpus sclerocephalus</i> (Decne.) Dahlgren & Thulin | Caryophyllaceae  | Acc      | Acc  | Acc  | Acc  | Acc  | Acc  | Acc | 4        |   |   |   | 1 |   | 1 |   |                | P      |            |            |
| <i>Gymnosporia cassinoides</i> (L'Hér.) Masf.                | Celastraceae     | Acc      | Acc  | Acc  | Acc  | Acc  | Acc  | NL  | 5        | 1 | 1 | 1 | 1 | 1 | 1 |   | A              | S      |            |            |
| <i>Gymnosporia cryptopetala</i> Reyes-Bet. & A.Santos        | Celastraceae     | Acc      | Acc  | Acc  | Acc  | Acc  | Acc  | NL  | 0        |   |   |   |   |   | 1 | 1 | A              | P      |            |            |
| <i>Gypsophila elegans</i> M.Bieb                             | Caryophyllaceae  | Acc      | Acc  | Acc  | Acc  | Acc  | Acc  | Acc | 4        |   |   |   | 1 |   |   |   |                |        | S          |            |
| <i>Gypsophila vaccaria</i> (L.) Sm.                          | Caryophyllaceae  | Syn      | Syn  | Acc  | Syn  | Acc  | Acc  | Syn | 38       |   |   |   | 1 |   | 1 | 1 |                | P      |            |            |
| <i>Haageocereus multangularis</i> (Haw.) F. Ritter           | Cactaceae        | Syn      | NL   | NL   | Acc  | AmUn | Acc  | NL  |          |   |   |   | 1 |   |   |   |                |        | S          | O          |
| <i>Habenaria tridactylites</i> Lindl.                        | Orchidaceae      | Acc      | Acc  | Acc  | Acc  | Acc  | Acc  | Acc | 1        | 1 | 1 | 1 | 1 | 1 |   | 1 | A              | S      |            |            |
| <i>Hainardia cylindrica</i> (Willd.) Greuter                 | Poaceae          | Acc      | Acc  | Acc  | Acc  | Acc  | Acc  | Acc | 16       |   | 1 |   | 1 | 1 |   | 1 |                | P      |            |            |
| <i>Halophila decipiens</i> Ostenfeld                         | Hydrocharitaceae | Acc      | NL   | Acc  | Acc  | Acc  | Acc  | Acc | 1        | 1 | 1 |   | 1 | 1 |   |   |                | S      |            |            |
| <i>Harrisia tetracantha</i> (Labour)                         | Cactaceae        | NL       | NL   | Acc  | Acc  | Acc  | Acc  | Acc | 3        |   |   |   |   | 1 |   |   |                |        | S          | O          |
| <i>Heberdenia excelsa</i> Banks ex Schult.                   | Primulaceae      | Acc      | Acc  | Acc  | AmUn | Acc  | Acc  | NL  | 8        | 1 | 1 | 1 | 1 | 1 | 1 |   |                | S      |            |            |
| <i>Hedera canariensis</i> Willd.                             | Araliaceae       | Acc      | Acc  | Acc  | Acc  | Acc  | Acc  | Acc | 2        | 1 | 1 | 1 | 1 | 1 |   |   | A              | S      |            |            |
| <i>Hedera helix</i> L.                                       | Araliaceae       | Acc      | Acc  | Acc  | Acc  | Acc  | Acc  | Acc | 2        |   | 1 | 1 | 1 | 1 | 1 |   |                |        | S          | O          |
| <i>Hedychium coronarium</i> J.Koenig                         | Zingiberaceae    | NL       | NL   | Acc  | Acc  | Acc  | Acc  | Acc | 13       |   | 1 |   |   |   |   |   |                |        | S          |            |
| <i>Hedychium gardnerianum</i> Sheppard ex Ker Gawl.          | Zingiberaceae    | Acc      | Acc  | Acc  | Acc  | Acc  | Acc  | Acc | 2        |   | 1 |   | 1 |   |   |   |                |        | I          | O          |
| <i>Hedypnois rhagadioloides</i> (L.) F.W.Schmidt             | Asteraceae       | Acc      | Acc  | Acc  | Acc  | Acc  | Acc  | Acc | 35       | 1 | 1 | 1 | 1 | 1 | 1 | 1 |                | P      |            |            |
| <i>Helianthemum aganae</i> Marrero Rodr. & R. Mesa           | Cistaceae        | Acc      | Acc  | Acc  | Acc  | Acc  | Acc  | NL  | 0        |   |   | 1 |   |   |   |   | G              | S      |            |            |
| <i>Helianthemum aguloi</i> Marrero Rodr. & R. Mesa           | Cistaceae        | Acc      | Acc  | Acc  | Acc  | Acc  | Acc  | NL  | 0        |   |   | 1 |   |   |   |   | G              | S      |            |            |
| <i>Helianthemum bramwelliorum</i> Marrero Rodr.              | Cistaceae        | Acc      | Acc  | Acc  | AmUn | Acc  | Acc  | NL  | 0        |   |   |   |   |   |   | 1 | L              | S      |            |            |
| <i>Helianthemum broussonetii</i> Dunal                       | Cistaceae        | Acc      | Acc  | Acc  | AmUn | Acc  | Acc  | Acc | 0        |   | 1 |   | 1 |   |   |   | A              | S      |            |            |
| <i>Helianthemum bystropogophyllum</i> Svent.                 | Cistaceae        | Acc      | Acc  | Acc  | AmUn | Acc  | Acc  | Acc | 0        |   |   |   |   | 1 |   |   | C              | S      |            |            |
| <i>Helianthemum canariense</i> (Jacq.) Pers.                 | Cistaceae        | Acc      | Acc  | Acc  | Acc  | Acc  | Acc  | Acc | 5        | 1 | 1 | 1 | 1 | 1 | 1 | 1 |                | S      |            |            |
| <i>Helianthemum cirae</i> A.Santos                           | Cistaceae        | Acc      | Acc  | Acc  | Acc  | Acc  | Acc  | NL  | 0        |   | 1 |   |   |   |   |   | P              | S      |            |            |
| <i>Helianthemum gonzalezferreri</i> Marrero Rodr.            | Cistaceae        | Acc      | Acc  | Acc  | NL   | Acc  | Acc  | NL  | 0        |   |   |   |   |   |   | 1 | L              | S      |            |            |

| Species Name                                                    | Family       | Atlantis | Muer | POWO | WFO  | COL  | GBIF | TRY | POWO Syn | H | P | G | T | C | F | L | Endemic Status | Native | Non native | Ornam Crop |
|-----------------------------------------------------------------|--------------|----------|------|------|------|------|------|-----|----------|---|---|---|---|---|---|---|----------------|--------|------------|------------|
| <i>Helianthemum inaguae</i> Marrero Rodr., Gonz-Mart & Gonz-Art | Cistaceae    | Acc      | Acc  | Acc  | AmUn | Acc  | Acc  | NL  | 0        |   |   |   |   | 1 |   |   | C              | S      |            |            |
| <i>Helianthemum juliae</i> Wildpret                             | Cistaceae    | Acc      | Acc  | Acc  | AmUn | Acc  | Acc  | NL  | 0        |   |   |   | 1 |   |   |   | T              | S      |            |            |
| <i>Helianthemum ledifolium</i> (L.) Mill.                       | Cistaceae    | Acc      | Acc  | Acc  | Acc  | Acc  | Acc  | Acc | 7        |   |   |   |   |   | 1 | 1 |                | P      |            |            |
| <i>Helianthemum linii</i> A. Santos                             | Cistaceae    | Acc      | Acc  | Acc  | NL   | Acc  | Acc  | NL  | 0        |   | 1 |   |   |   |   |   | P              | S      |            |            |
| <i>Helianthemum salicifolium</i> (L.) Mill.                     | Cistaceae    | Acc      | Acc  | Acc  | Acc  | Acc  | Acc  | Acc | 16       |   |   | 1 |   | 1 |   |   |                | P      |            |            |
| <i>Helianthemum teneriffae</i> Coss.                            | Cistaceae    | Acc      | Acc  | Acc  | AmUn | Acc  | Acc  | NL  | 0        |   |   |   | 1 |   |   |   | T              | S      |            |            |
| <i>Helianthemum tholiforme</i> Bramwell, J. Ortega & B. Navarro | Cistaceae    | Acc      | Acc  | Acc  | AmUn | Acc  | Acc  | NL  | 0        |   |   |   |   | 1 |   |   | C              | S      |            |            |
| <i>Helianthemum thymiphyllum</i> Svent.                         | Cistaceae    | Acc      | Acc  | Acc  | AmUn | Acc  | Acc  | Acc | 0        |   |   |   |   |   | 1 | 1 | A              | S      |            |            |
| <i>Helianthemum villosum</i> Thibaud                            | Cistaceae    | Acc      | Acc  | Acc  | Acc  | AmUn | Acc  | NL  | 3        |   |   |   |   |   | 1 |   |                | P      |            |            |
| <i>Helianthus annuus</i> L.                                     | Asteraceae   | Acc      | Acc  | Acc  | Acc  | Acc  | Acc  | Acc | 49       |   | 1 |   | 1 |   | 1 |   |                |        | S          | C          |
| <i>Helichrysum alucense</i> Garcia-Cas. & al.                   | Asteraceae   | Acc      | Acc  | Acc  | AmUn | Acc  | Acc  | NL  | 0        |   |   | 1 |   |   |   |   | G              | S      |            |            |
| <i>Helichrysum gossypinum</i> Sch.Bip.                          | Asteraceae   | Acc      | Acc  | Acc  | Acc  | Acc  | Acc  | Acc | 3        |   |   |   |   | 1 |   | 1 | A              | S      |            |            |
| <i>Helichrysum luteoalbum</i> (L.) Rchb.                        | Asteraceae   | Syn      | Syn  | Acc  | Acc  | Acc  | Acc  | Syn | 27       | 1 | 1 | 1 | 1 | 1 | 1 | 1 |                | P      |            |            |
| <i>Helichrysum monogynum</i> B.L.Burt. & Sunding                | Asteraceae   | Acc      | Acc  | Acc  | Acc  | Acc  | Acc  | Acc | 0        |   |   |   |   |   |   | 1 | L              | S      |            |            |
| <i>Helichrysum orientale</i> (L.) Gaertn.                       | Asteraceae   | Acc      | NL   | Acc  | AmUn | Acc  | Acc  | Acc | 8        |   |   |   |   | 1 |   | 1 |                |        | S          |            |
| <i>Helichrysum petiolare</i> Hilliard & B.L.Burt                | Asteraceae   | Acc      | Acc  | Acc  | Acc  | Acc  | Acc  | Acc | 2        |   | 1 |   |   |   |   |   |                |        | S          |            |
| <i>Helichrysum teydeum</i> (Wildpret & Greuter) Raus            | Asteraceae   | Syn      | Syn  | Acc  | Acc  | Acc  | Acc  | Syn | 2        |   |   |   | 1 |   |   |   | T              | S      |            |            |
| <i>Helichrysum teydeum</i> (Wildpret & Greuter) Raus            | Asteraceae   | NL       | Syn  | Acc  | Acc  | Acc  | Acc  | Syn | 2        |   |   |   | 1 |   |   |   | T              | S      |            |            |
| <i>Helictochloa marginata</i> (Lowe) Romero Zarco               | Poaceae      | Acc      | Acc  | Acc  | AmUn | Acc  | Acc  | Acc | 40       |   |   | 1 | 1 |   |   |   |                | P      |            |            |
| <i>Heliotropium arborescens</i> L.                              | Boraginaceae | Acc      | NL   | Acc  | Acc  | Acc  | Acc  | Acc | 11       |   |   |   | 1 | 1 |   |   |                |        | S          | O          |
| <i>Heliotropium crispum</i> Desf.                               | Boraginaceae | Syn      | Syn  | Acc  | Acc  | Syn  | Syn  | Acc | 9        | 1 | 1 | 1 | 1 | 1 | 1 | 1 |                | S      |            |            |
| <i>Heliotropium curassavicum</i> L.                             | Boraginaceae | Acc      | Acc  | Acc  | Acc  | Acc  | Acc  | Acc | 11       |   |   |   | 1 | 1 | 1 |   |                |        | S          |            |
| <i>Heliotropium europaeum</i> L.                                | Boraginaceae | Acc      | Acc  | Acc  | Acc  | Acc  | Acc  | Acc | 15       |   | 1 |   | 1 | 1 | 1 | 1 |                | P      |            |            |



| Species Name                                                   | Family          | Atlantis | Muer | POWO | WFO  | COL | GBIF | TRY | POWO Syn | H | P | G | T | C | F | L | Endemic Status | Native | Non native | Ornam Crop |
|----------------------------------------------------------------|-----------------|----------|------|------|------|-----|------|-----|----------|---|---|---|---|---|---|---|----------------|--------|------------|------------|
| <i>Heliotropium supinum</i> L.                                 | Boraginaceae    | Acc      | Acc  | Acc  | Acc  | Acc | Acc  | Acc | 11       |   |   |   |   |   | 1 |   |                | P      |            |            |
| <i>Helminthotheca echioides</i> (L.) Holub                     | Asteraceae      | Acc      | Acc  | Acc  | Acc  | Acc | Acc  | Acc | 16       | 1 | 1 | 1 | 1 | 1 | 1 | 1 |                | P      |            |            |
| <i>Hemarthria altissima</i> (Poir.) Stapf & C.E.Hubb.          | Poaceae         | Acc      | Acc  | Acc  | Acc  | Acc | Acc  | Acc | 17       |   | 1 |   | 1 |   |   |   |                |        | I          |            |
| <i>Hemionitis gluckuk</i> Christenh.                           | Pteridaceae     | NL       | Syn  | Acc  | AmUn | Acc | Syn  | NL  | 7        | 1 | 1 | 1 | 1 | 1 |   |   |                | S      |            |            |
| <i>Hemionitis guanchica</i> (Bolle) Christenh.                 | Pteridaceae     | Syn      | Syn  | Acc  | Syn  | Syn | Syn  | Syn | 5        | 1 | 1 | 1 | 1 | 1 | 1 | 1 |                | S      |            |            |
| <i>Hemionitis pteridioides</i> (Reichard) Christenh.           | Pteridaceae     | Syn      | Syn  | Acc  | Syn  | Syn | Syn  | Syn | 25       | 1 | 1 | 1 | 1 | 1 | 1 | 1 |                | S      |            |            |
| <i>Hemionitis pulchella</i> (Bory ex Willd.) Christenh.        | Pteridaceae     | Syn      | Syn  | Acc  | NL   | Syn | Syn  | NL  | 4        | 1 | 1 | 1 | 1 | 1 |   |   | A              | S      |            |            |
| <i>Hemionitis tinaei</i> (Tod.) Christenh.                     | Pteridaceae     | Syn      | Syn  | Acc  | Syn  | Syn | Syn  | Syn | 5        |   |   |   | 1 |   |   |   |                | S      |            |            |
| <i>Herniaria canariensis</i> Chaudhri                          | Caryophyllaceae | Acc      | Acc  | Acc  | AmUn | Acc | Acc  | Acc | 1        |   |   |   | 1 |   |   |   | T              | S      |            |            |
| <i>Herniaria cinerea</i> DC.                                   | Caryophyllaceae | Acc      | Acc  | Acc  | Syn  | Acc | Acc  | Syn | 8        | 1 |   | 1 | 1 | 1 | 1 | 1 |                | P      |            |            |
| <i>Herniaria fontanesii</i> J.Gay                              | Caryophyllaceae | Acc      | Acc  | Acc  | Acc  | Acc | Acc  | Acc | 5        |   |   |   | 1 | 1 | 1 |   |                | P      |            |            |
| <i>Hesperocyparis macrocarpa</i> (Hartw.) Bartel               | Cupressaceae    | Acc      | Syn  | Acc  | Syn  | Syn | Syn  | Syn | 9        |   | 1 |   | 1 | 1 |   |   |                |        | S          | O          |
| <i>Heteropogon contortus</i> (L.) P.Beauv. ex Roem. & Schult.  | Poaceae         | Acc      | Acc  | Acc  | Acc  | Acc | Acc  | Acc | 32       |   |   | 1 | 1 | 1 |   |   |                | P      |            |            |
| <i>Hibiscus rosa-sinensis</i> L.                               | Malvaceae       | NL       | NL   | Acc  | Acc  | Acc | Acc  | Acc | 6        |   | 1 | 1 | 1 | 1 | 1 | 1 |                |        | S          | O          |
| <i>Hibiscus schizopetalus</i> (Dyer) Hook.f.                   | Malvaceae       | NL       | NL   | Acc  | Acc  | Acc | Acc  | Acc | 2        |   |   |   | 1 | 1 |   |   |                |        | S          | O          |
| <i>Hibiscus trionum</i> L.                                     | Malvaceae       | NL       | NL   | Acc  | Acc  | Acc | Acc  | Acc | 25       |   |   |   |   | 1 |   |   |                |        | S          |            |
| <i>Himantoglossum metlesicsianum</i> (W.P.Teschner) P.Delforge | Orchidaceae     | Acc      | Acc  | Acc  | Acc  | Acc | Acc  | Acc | 1        |   | 1 |   | 1 | 1 |   |   | A              | S      |            |            |
| <i>Hippocrepis constricta</i> Kunze                            | Fabaceae        | Acc      | Acc  | Acc  | Acc  | Acc | Acc  | Acc | 5        | 1 |   |   |   | 1 |   |   |                | P      |            |            |
| <i>Hippocrepis multisiliquosa</i> L.                           | Fabaceae        | Acc      | Acc  | Acc  | Acc  | Acc | Acc  | Acc | 6        | 1 |   | 1 |   | 1 | 1 | 1 |                | P      |            |            |
| <i>Hippocrepis salzmännii</i> Boiss. & Reut.                   | Fabaceae        | NL       | NL   | Acc  | Acc  | Acc | Acc  | Acc | 1        |   |   |   |   |   | 1 | 1 |                | P      |            |            |
| <i>Hirschfeldia incana</i> (L.) Lagr.-Foss                     | Brassicaceae    | Acc      | Acc  | Acc  | Acc  | Acc | Acc  | Acc | 27       | 1 | 1 | 1 | 1 | 1 | 1 | 1 |                | P      |            |            |
| <i>Hoffmannseggia glauca</i> (Ortega) Eifert                   | Fabaceae        | Acc      | Acc  | Acc  | Acc  | Acc | Acc  | Acc | 24       |   |   |   | 1 |   |   |   |                | S      |            |            |
| <i>Holcus annuus</i> Salzm. & C. A. Meyer                      | Poaceae         | Acc      | NL   | Acc  | Acc  | Acc | Acc  | Acc | 1        |   |   |   |   | 1 |   |   |                | P      |            |            |

| Species Name                                                     | Family           | Atlantis | Muer | POWO | WFO  | COL | GBIF | TRY | POWO Syn | H | P | G | T | C | F | L | Endemic Status | Native | Non native | Ornam Crop |
|------------------------------------------------------------------|------------------|----------|------|------|------|-----|------|-----|----------|---|---|---|---|---|---|---|----------------|--------|------------|------------|
| <i>Holcus hierrensis</i> (Stierst.) Stierst. & M.Seq.            | Poaceae          | Syn      | Acc  | Acc  | Syn  | Acc | Acc  | NL  | 1        | 1 |   |   |   |   |   |   | H              | S      |            |            |
| <i>Holcus lanatus</i> L.                                         | Poaceae          | Acc      | Acc  | Acc  | Acc  | Acc | Acc  | Acc | 19       |   | 1 | 1 | 1 | 1 |   |   |                | P      |            |            |
| <i>Hordeum distichon</i> L.                                      | Poaceae          | Acc      | Acc  | Acc  | Acc  | Acc | Acc  | Acc | 36       |   |   |   | 1 | 1 |   |   |                |        | P          |            |
| <i>Hordeum marinum</i> Huds.                                     | Poaceae          | Acc      | Acc  | Acc  | Acc  | Acc | Acc  | Acc | 2        |   |   |   | 1 | 1 | 1 | 1 |                | P      |            |            |
| <i>Hordeum murinum</i> L. subsp. <i>glaucum</i> (Steud) Tzvelev  | Poaceae          | Acc      | Syn  | Acc  | Acc  | Acc | Acc  | Acc | 7        |   |   |   | 1 | 1 | 1 | 1 |                | P      |            |            |
| <i>Hordeum murinum</i> L. subsp. <i>leporinum</i> (Link) Arcang. | Poaceae          | Acc      | Syn  | Acc  | Acc  | Syn | Acc  | Acc | 11       | 1 | 1 | 1 | 1 | 1 | 1 | 1 |                | P      |            |            |
| <i>Hordeum vulgare</i> L.                                        | Poaceae          | Acc      | Acc  | Acc  | Acc  | Acc | Acc  | Acc | 129      |   | 1 |   | 1 |   | 1 | 1 |                |        | S          | C          |
| <i>Hornungia procumbens</i> (L.) Hayek                           | Brassicaceae     | Acc      | Acc  | Acc  | Acc  | Acc | Acc  | Acc | 44       |   |   |   | 1 | 1 |   |   |                |        | P          |            |
| <i>Humulus lupulus</i> L.                                        | Cannabaceae      | Syn      | NL   | Acc  | Acc  | Acc | Acc  | Acc | 8        |   |   |   |   | 1 | 1 |   |                |        | S          | C          |
| <i>Hunnemannia fumariifolia</i> Sweet                            | Papaveraceae     | Acc      | Acc  | Acc  | Acc  | Acc | Acc  | Acc | 2        |   |   |   |   | 1 |   | 1 |                |        | S          | O          |
| <i>Hydrangea macrophylla</i> (Thunb.) Ser.                       | Hydrangeaceae    | Acc      | Acc  | Acc  | Acc  | Acc | Acc  | Acc | 30       |   | 1 |   | 1 |   |   |   |                |        | S          | O          |
| <i>Hydrilla verticillata</i> (L.f.) Royle                        | Hydrocharitaceae | Acc      | Acc  | Acc  | Acc  | Acc | Acc  | Acc | 21       |   | 1 |   | 1 |   |   |   |                |        | I          |            |
| <i>Hydrocotyle bowlesioides</i> Mathias & Constance              | Apiaceae         | Acc      | NL   | Acc  | Acc  | Acc | Acc  | Acc | 0        |   |   |   | 1 |   |   |   |                |        | S          |            |
| <i>Hydrocotyle microphylla</i> A. Cunn.                          | Apiaceae         | Acc      | Acc  | Acc  | Acc  | Acc | Acc  | NL  | 0        |   |   |   | 1 |   |   |   |                |        | S          |            |
| <i>Hymenophyllum tunbrigense</i> (L.) Sm.                        | Hymenophyllaceae | Acc      | Acc  | Acc  | Acc  | Acc | Acc  | Acc | 9        |   |   | 1 | 1 | 1 |   |   |                | S      |            |            |
| <i>Hymenophyllum wilsonii</i> Hook                               | Hymenophyllaceae | Acc      | Acc  | Acc  | Syn  | Acc | Acc  | Syn | 0        |   |   | 1 | 1 | 1 |   |   |                | P      |            |            |
| <i>Hyoscyamus albus</i> L.                                       | Solanaceae       | Acc      | Acc  | Acc  | Acc  | Acc | Acc  | Acc | 7        | 1 | 1 | 1 | 1 | 1 | 1 | 1 |                | P      |            |            |
| <i>Hyoseris radiata</i> L.                                       | Asteraceae       | Acc      | Acc  | Acc  | Acc  | Acc | Acc  | Acc | 10       |   |   |   |   | 1 |   |   |                |        | S          |            |
| <i>Hyparrhenia arrhenobasis</i> (Hochst. ex Steud.) Stapf        | Poaceae          | Acc      | Acc  | Acc  | Acc  | Acc | Acc  | Acc | 2        |   |   |   | 1 |   |   |   |                |        | S          |            |
| <i>Hyparrhenia hirta</i> (L.) Stapf                              | Poaceae          | Acc      | Acc  | Acc  | Acc  | Acc | Acc  | Acc | 25       | 1 | 1 | 1 | 1 | 1 | 1 | 1 |                | S      |            |            |
| <i>Hypecoum procumbens</i> L.                                    | Papaveraceae     | Acc      | NL   | Acc  | Acc  | Acc | Acc  | Acc | 6        |   |   |   |   |   |   |   |                |        | P          |            |
| <i>Hypericum canariense</i> L.                                   | Hypericaceae     | Acc      | Acc  | Acc  | Acc  | Acc | Acc  | Acc | 7        | 1 | 1 | 1 | 1 | 1 |   |   |                | S      |            |            |
| <i>Hypericum coadunatum</i> C.Sm. Ex Link.                       | Hypericaceae     | Acc      | Acc  | Acc  | AmUn | Acc | Acc  | Acc | 0        |   |   |   |   | 1 |   |   | C              | S      |            |            |

| Species Name                                                               | Family          | Atlantis | Muer | POWO | WFO  | COL | GBIF | TRY | POWO Syn | H | P | G | T | C | F | L | Endemic Status | Native | Non native | Ornam Crop |
|----------------------------------------------------------------------------|-----------------|----------|------|------|------|-----|------|-----|----------|---|---|---|---|---|---|---|----------------|--------|------------|------------|
| <i>Hypericum glandulosum</i> Aiton                                         | Hypericaceae    | Acc      | Acc  | Acc  | AmUn | Acc | Acc  | Acc | 2        |   | 1 | 1 | 1 | 1 | 1 |   |                | S      |            |            |
| <i>Hypericum grandifolium</i> Choisy                                       | Hypericaceae    | Acc      | Acc  | Acc  | Acc  | Acc | Acc  | Acc | 2        | 1 | 1 | 1 | 1 | 1 | 1 | 1 |                | S      |            |            |
| <i>Hypericum humifusum</i> L.                                              | Hypericaceae    | Acc      | Acc  | Acc  | Acc  | Acc | Acc  | Acc | 7        |   | 1 |   |   |   |   |   |                | P      |            |            |
| <i>Hypericum perforiatum</i> L.                                            | Hypericaceae    | Acc      | Acc  | Acc  | Acc  | Acc | Acc  | Acc | 7        |   |   |   |   | 1 |   |   |                | P      |            |            |
| <i>Hypericum perforatum</i> L.                                             | Hypericaceae    | Acc      | Acc  | Acc  | Acc  | Acc | Acc  | Acc | 3        |   | 1 |   | 1 |   |   |   |                | P      |            |            |
| <i>Hypericum reflexum</i> L.f.                                             | Hypericaceae    | Acc      | Acc  | Acc  | AmUn | Acc | Acc  | Acc | 1        |   |   | 1 | 1 | 1 |   |   | A              | S      |            |            |
| <i>Hypochaeris achyrophorus</i> L.                                         | Asteraceae      | Syn      | Acc  | Acc  | Acc  | Acc | Acc  | Acc | 16       |   |   |   | 1 |   |   | 1 |                | P      |            |            |
| <i>Hypochaeris glabra</i> L.                                               | Asteraceae      | Acc      | Acc  | Acc  | Acc  | Acc | Acc  | Acc | 33       | 1 | 1 | 1 | 1 | 1 | 1 | 1 |                | P      |            |            |
| <i>Hypochaeris oligocephala</i> (Svent. & Bramwell) Lack                   | Asteraceae      | Acc      | Acc  | Acc  | Acc  | Acc | Acc  | Acc | 1        |   |   |   | 1 |   |   |   | T              | S      |            |            |
| <i>Hypochaeris radicata</i> L.                                             | Asteraceae      | Acc      | Acc  | Acc  | AmUn | Acc | Acc  | Acc | 14       | 1 | 1 | 1 | 1 |   | 1 |   |                | P      |            |            |
| <i>Iberis odorata</i> L.                                                   | Brassicaceae    | Acc      | Acc  | Acc  | Acc  | Acc | Acc  | Acc | 4        |   |   |   |   | 1 |   |   |                |        | P          | O          |
| <i>Ifloga obovata</i> Bolle                                                | Asteraceae      | Syn      | Acc  | Acc  | Acc  | Acc | Acc  | Syn | 1        |   |   |   | 1 |   | 1 | 1 | A              | S      |            |            |
| <i>Ifloga spicata</i> (Forssk.) Sch.Bip. subsp. <i>spicata</i>             | Asteraceae      | Acc      | NL   | Acc  | NL   | Acc | Acc  | NL  | 11       | 1 | 1 | 1 | 1 | 1 | 1 | 1 |                | P      |            |            |
| <i>Ilex canariensis</i> Poir.                                              | Aquifoliaceae   | Acc      | Acc  | Acc  | AmUn | Acc | Acc  | Acc | 1        | 1 | 1 | 1 | 1 | 1 |   |   | A              | S      |            |            |
| <i>Ilex perado</i> Aiton subsp. <i>lopezlilloi</i> (G. Kunkel) S. Andrews  | Aquifoliaceae   | Acc      | Acc  | Acc  | Acc  | Acc | Acc  | NL  | 2        |   |   | 1 |   |   |   |   | G              | S      |            |            |
| <i>Ilex perado</i> Aiton subsp. <i>platyphylla</i> (Webb & Berthel.) Tutin | Aquifoliaceae   | Acc      | Acc  | NL   | Acc  | Acc | Acc  | Acc |          |   | 1 | 1 | 1 |   |   |   | A              | S      |            |            |
| <i>Illecebrum verticillatum</i> L.                                         | Caryophyllaceae | Acc      | Acc  | Acc  | Acc  | Acc | Acc  | Acc | 4        |   |   |   | 1 | 1 |   |   |                | P      |            |            |
| <i>Impatiens hawkeri</i> W.Bull.                                           | Balsaminaceae   | NL       | NL   | Acc  | Acc  | Acc | Acc  | Acc | 0        |   |   |   |   | 1 |   |   |                |        | S          | O          |
| <i>Impatiens sodenii</i> Engl. & Warb.                                     | Balsaminaceae   | Acc      | Acc  | Acc  | Acc  | Acc | Acc  | Acc | 5        |   | 1 |   | 1 | 1 |   |   |                |        | S          | O          |
| <i>Impatiens walleriana</i> Hook.f.                                        | Balsaminaceae   | Acc      | Acc  | Acc  | Acc  | Acc | Acc  | Acc | 5        |   | 1 |   | 1 | 1 |   |   |                |        | S          | O          |
| <i>Imperata cylindrica</i> (L.) Raeusch.                                   | Poaceae         | Acc      | Acc  | Acc  | Acc  | Acc | Acc  | Acc | 32       |   |   |   |   | 1 | 1 |   |                |        | I          | O          |
| <i>lochroma cyaneum</i> (Lindl.) M.L. Green                                | Solanaceae      | NL       | NL   | Acc  | Acc  | Acc | Acc  | Acc | 8        |   |   |   | 1 |   |   |   |                |        | S          | O          |
| <i>Ipomoea batatas</i> (L.) Lam.                                           | Convolvulaceae  | Acc      | Acc  | Acc  | Acc  | Acc | Acc  | Acc | 4        |   | 1 | 1 | 1 | 1 | 1 | 1 |                |        | S          | C          |

| Species Name                                                          | Family         | Atlantis | Muer | POWO | WFO  | COL | GBIF | TRY | POWO Syn | H | P | G | T | C | F | L | Endemic Status | Native | Non native | Ornam Crop |
|-----------------------------------------------------------------------|----------------|----------|------|------|------|-----|------|-----|----------|---|---|---|---|---|---|---|----------------|--------|------------|------------|
| <i>Ipomoea cairica</i> (L.) Sweet                                     | Convolvulaceae | Acc      | Acc  | Acc  | Acc  | Acc | Acc  | Acc | 38       | 1 | 1 | 1 | 1 | 1 | 1 | 1 |                |        | I          | O          |
| <i>Ipomoea corymbosa</i> (L.) Roth                                    | Convolvulaceae | Syn      | NL   | Acc  | Syn  | Syn | Syn  | Syn | 22       |   |   |   | 1 | 1 |   |   |                |        | S          | O          |
| <i>Ipomoea imperati</i> (Vahl) Griseb                                 | Convolvulaceae | Syn      | Syn  | Acc  | Acc  | Acc | Acc  | Acc | 33       |   |   |   |   | 1 |   |   | C              | P      |            | O          |
| <i>Ipomoea indica</i> (Burm.) Merr.                                   | Convolvulaceae | Acc      | Acc  | Acc  | Acc  | Acc | Acc  | Acc | 60       | 1 | 1 | 1 | 1 | 1 | 1 |   |                |        | I          | O          |
| <i>Ipomoea nil</i> (L.) Roth                                          | Convolvulaceae | Syn      | Syn  | Acc  | Acc  | Acc | Acc  | Acc | 39       |   |   |   |   |   |   | 1 |                |        | S          | O          |
| <i>Ipomoea pes-caprae</i> (L.) R.Br.                                  | Convolvulaceae | Acc      | Acc  | Acc  | Acc  | Acc | Acc  | Acc | 27       |   |   |   |   |   |   | 1 |                |        | S          | O          |
| <i>Ipomoea purpurea</i> (L.) Roth.                                    | Convolvulaceae | Acc      | Acc  | Acc  | Acc  | Acc | Acc  | Acc | 26       |   | 1 |   | 1 | 1 |   |   |                |        | S          | O          |
| <i>Iris florentina</i> L.                                             | Iridaceae      | Syn      | Syn  | Acc  | AmUn | Syn | Acc  | Acc | 4        |   | 1 | 1 | 1 | 1 |   |   |                |        | S          | O          |
| <i>Iris foetidissima</i> L.                                           | Iridaceae      | Acc      | Acc  | Acc  | Acc  | Acc | Acc  | Acc | 6        |   | 1 | 1 | 1 |   |   |   |                |        | S          | O          |
| <i>Iris pallida</i> Lam.                                              | Iridaceae      | Acc      | Acc  | Acc  | Acc  | Acc | Acc  | Acc | 2        |   | 1 |   | 1 |   |   |   |                |        | S          | O          |
| <i>Iris x germanica</i> L.                                            | Iridaceae      | Syn      | Syn  | Acc  | Acc  | Acc | Acc  | Acc | 36       |   | 1 |   |   | 1 |   |   |                |        | S          | O          |
| <i>Isatis tinctoria</i> L.                                            | Brassicaceae   | Acc      | Acc  | Acc  | Acc  | Acc | Acc  | Acc | 26       | 1 |   |   |   |   |   |   |                |        | S          | C          |
| <i>Isolepis cernua</i> (Vahl) Roem. & Schult.                         | Cyperaceae     | Acc      | Acc  | Acc  | Acc  | Acc | Acc  | Acc | 3        |   | 1 |   |   | 1 |   | 1 |                | P      |            |            |
| <i>Ixanthus viscosus</i> (Aiton) Griseb.                              | Gentianaceae   | Acc      | Acc  | Acc  | Acc  | Acc | Acc  | Acc | 5        | 1 | 1 | 1 | 1 | 1 |   |   | A              | S      |            |            |
| <i>Jacaranda mimosifolia</i> D.Don                                    | Bignoniaceae   | Acc      | Acc  | Acc  | Acc  | Acc | Acc  | Acc | 2        |   | 1 | 1 | 1 | 1 | 1 |   |                |        | S          | O          |
| <i>Jacobaea maritima</i> (L.) Pelser & Meijden subsp. <i>maritima</i> | Asteraceae     | Acc      | NL   | Acc  | Syn  | Acc | Acc  | NL  | 13       |   |   |   |   | 1 |   |   |                |        | S          |            |
| <i>Juglans regia</i> L.                                               | Juglandaceae   | Acc      | Acc  | Acc  | Acc  | Acc | Acc  | Acc | 16       |   |   |   |   | 1 |   |   |                |        | S          | C          |
| <i>Juncus acutus</i> L. subsp. <i>acutus</i>                          | Juncaceae      | Acc      | Acc  | Acc  | Syn  | Acc | Acc  | NL  | 3        |   | 1 | 1 | 1 | 1 | 1 |   |                | P      |            |            |
| <i>Juncus acutus</i> L. subsp. <i>leopoldii</i> (Parl.) Snogerup      | Juncaceae      | Acc      | Acc  | Acc  | Acc  | Syn | Syn  | Acc | 4        |   |   |   |   |   |   | 1 |                | P      |            |            |
| <i>Juncus articulatus</i> L.                                          | Juncaceae      | Acc      | Acc  | Acc  | Acc  | Acc | Acc  | Acc | 0        |   |   |   |   | 1 |   |   |                | P      |            |            |
| <i>Juncus bufonius</i> L.                                             | Juncaceae      | Acc      | Acc  | Acc  | Acc  | Acc | Acc  | Acc | 21       | 1 | 1 | 1 | 1 | 1 | 1 | 1 |                | P      |            |            |
| <i>Juncus capitatus</i> Weigel                                        | Juncaceae      | Acc      | Acc  | Acc  | Acc  | Acc | Acc  | Acc | 7        | 1 | 1 | 1 | 1 | 1 |   |   |                | P      |            |            |
| <i>Juncus effusus</i> L.                                              | Juncaceae      | Acc      | Acc  | Acc  | Acc  | Acc | Acc  | Acc | 4        |   | 1 | 1 | 1 | 1 |   |   |                | P      |            |            |
| <i>Juncus inflexus</i> L.                                             | Juncaceae      | Acc      | Acc  | Acc  | Acc  | Acc | Acc  | Acc | 0        |   |   |   |   | 1 |   |   |                | P      |            |            |

| Species Name                                                                                     | Family         | Atlantis | Muer | POWO | WFO  | COL  | GBIF | TRY | POWO Syn | H | P | G | T | C | F | L | Endemic Status | Native | Non native | Ornam Crop |
|--------------------------------------------------------------------------------------------------|----------------|----------|------|------|------|------|------|-----|----------|---|---|---|---|---|---|---|----------------|--------|------------|------------|
| <i>Juncus maritimus</i> Lam.                                                                     | Juncaceae      | Acc      | Acc  | Acc  | Acc  | Acc  | Acc  | Acc | 4        |   | 1 | 1 |   | 1 |   | 1 |                | P      |            |            |
| <i>Juniperus canariensis</i> Guyot & Mathou                                                      | Cupressaceae   | Syn      | Syn  | Acc  | Syn  | Syn  | Syn  | Syn | 2        | 1 | 1 | 1 | 1 | 1 |   |   |                | S      |            |            |
| <i>Juniperus cedrus</i> Webb & Berthel. subsp. <i>cedrus</i>                                     | Cupressaceae   | Acc      | NL   | NL   | NL   | AmUn | Acc  | Acc |          |   | 1 | 1 | 1 | 1 |   |   | A              | S      |            |            |
| <i>Justicia hyssopifolia</i> L.                                                                  | Acanthaceae    | Acc      | Acc  | Acc  | Acc  | Acc  | Acc  | Acc | 3        |   |   | 1 | 1 |   |   |   | A              | S      |            |            |
| <i>Kalanchoe daigremontiana</i> Raym.-Hamet & H. Perrier                                         | Crassulaceae   | Acc      | Acc  | Acc  | Acc  | Acc  | Acc  | Acc | 1        |   | 1 |   | 1 | 1 |   |   |                |        | S          | O          |
| <i>Kalanchoe delagoensis</i> Eckl. & Zeyh.                                                       | Crassulaceae   | Acc      | Acc  | Acc  | Syn  | Acc  | Acc  | Syn | 6        |   | 1 | 1 | 1 | 1 |   |   |                |        | S          | O          |
| <i>Kalanchoe fedtschenkoi</i> Raym.-Hamet & H. Perrier                                           | Crassulaceae   | NL       | NL   | Acc  | Syn  | Acc  | Acc  | Syn | 1        |   | 1 |   |   |   | 1 |   |                |        | S          |            |
| <i>Kalanchoe pinnata</i> (Lam.) Pers.                                                            | Crassulaceae   | Acc      | Acc  | Acc  | Syn  | Acc  | Acc  | Syn | 14       |   |   | 1 |   | 1 |   |   |                |        | S          | O          |
| <i>Kalanchoe prolifera</i> (Bowie ex Hook.) Raym.-Hamet                                          | Crassulaceae   | Acc      | Acc  | Acc  | Syn  | Acc  | Acc  | Syn | 2        |   | 1 |   |   | 1 |   |   |                |        | S          | O          |
| <i>Kickxia commutata</i> (Bernh. Ex Rchb.) Fritsch subsp. <i>commutata</i>                       | Plantaginaceae | Acc      | NL   | NL   | NL   | Acc  | Acc  | NL  |          |   |   |   | 1 |   |   |   |                | P      |            |            |
| <i>Kickxia commutata</i> (Bernh. Ex Rchb.) Fritsch subsp. <i>graeca</i> (Bory & Chaub.) R. Fern. | Plantaginaceae | Acc      | Acc  | Acc  | Acc  | Acc  | Acc  | NL  | 5        |   | 1 |   | 1 | 1 |   |   |                | P      |            |            |
| <i>Kickxia elatine</i> (L.) Dumort subsp. <i>elatine</i>                                         | Plantaginaceae | Acc      | Acc  | NL   | Syn  | Acc  | Acc  | NL  |          |   | 1 |   | 1 | 1 |   |   |                | P      |            |            |
| <i>Kickxia pendula</i> (G.Kunkel) G.Kunkel                                                       | Plantaginaceae | Acc      | Acc  | Acc  | AmUn | Syn  | Acc  | NL  | 2        |   |   |   |   | 1 |   |   | C              | S      |            |            |
| <i>Kickxia spuria</i> (L.) Dumort. subsp. <i>integrifolia</i> (Brot.) R.Fern.                    | Plantaginaceae | Acc      | Acc  | Acc  | Acc  | Acc  | Acc  | NL  | 3        |   | 1 |   |   |   |   |   |                |        | S          |            |
| <i>Kleinia neriifolia</i> Haw.                                                                   | Asteraceae     | Acc      | Acc  | Acc  | Acc  | Acc  | Acc  | Acc | 7        | 1 | 1 | 1 | 1 | 1 | 1 | 1 | A              | S      |            |            |
| <i>Kruberia peregrina</i> (L.) Lowe                                                              | Apiaceae       | Acc      | Acc  | Acc  | Acc  | Acc  | Acc  | Acc | 10       |   |   | 1 | 1 | 1 |   |   |                |        | P          |            |
| <i>Kumara plicatilis</i> (L.) G.D.Rowley                                                         | Aphodelaceae   | NL       | NL   | Acc  | Syn  | Acc  | Acc  | Acc | 9        |   |   |   | 1 |   |   |   |                |        | S          | O          |
| <i>Lablab purpureus</i> (L.) Sweet                                                               | Fabaceae       | Acc      | Acc  | Acc  | Acc  | Acc  | Acc  | Acc | 1        |   |   |   |   | 1 |   |   |                |        | S          | O          |
| <i>Lactuca palmensis</i> Bolle                                                                   | Asteraceae     | Acc      | Acc  | Acc  | Acc  | Acc  | Acc  | Acc | 1        |   | 1 |   |   |   |   |   | P              | S      |            |            |
| <i>Lactuca sativa</i> L.                                                                         | Asteraceae     | Acc      | Acc  | Acc  | Acc  | Acc  | Acc  | Acc | 16       |   | 1 | 1 | 1 |   | 1 | 1 |                |        | S          |            |
| <i>Lactuca serriola</i> L.                                                                       | Asteraceae     | Acc      | Acc  | Acc  | Acc  | Acc  | Acc  | Acc | 30       | 1 | 1 | 1 | 1 | 1 | 1 | 1 |                | P      |            |            |
| <i>Lactuca viminea</i> (L.) J.Presl & C.Presl. subsp. <i>ramosissima</i> (All.) Arcang.          | Asteraceae     | Acc      | NL   | Acc  | Acc  | Acc  | Acc  | NL  | 3        |   | 1 |   |   |   |   |   |                | P      |            |            |

| Species Name                                                                 | Family        | Atlantis | Muer | POWO | WFO | COL | GBIF | TRY | POWO Syn | H | P | G | T | C | F | L | Endemic Status | Native | Non native | Ornam Crop |
|------------------------------------------------------------------------------|---------------|----------|------|------|-----|-----|------|-----|----------|---|---|---|---|---|---|---|----------------|--------|------------|------------|
| <i>Lagenaria siceraria</i> (Molina) Standl.                                  | Cucurbitaceae | Acc      | NL   | Acc  | Acc | Acc | Acc  | Acc | 27       |   |   |   |   |   | 1 |   |                |        | S          | C          |
| <i>Lagurus ovatus</i> L.                                                     | Poaceae       | Acc      | Acc  | Acc  | Acc | Acc | Acc  | Acc | 9        | 1 |   | 1 | 1 | 1 |   |   |                | P      |            |            |
| <i>Lamarckia aurea</i> (L.) Moench                                           | Poaceae       | Acc      | Acc  | Acc  | Acc | Acc | Acc  | Acc | 7        | 1 | 1 | 1 | 1 | 1 | 1 | 1 |                | P      |            |            |
| <i>Lamium amplexicaule</i> L.                                                | Lamiaceae     | Acc      | Acc  | Acc  | Acc | Acc | Acc  | Acc | 4        | 1 | 1 | 1 | 1 | 1 | 1 | 1 |                |        | S          |            |
| <i>Lamium purpureum</i> L.                                                   | Lamiaceae     | Acc      | Acc  | Acc  | Acc | Acc | Acc  | Acc | 1        |   |   | 1 | 1 | 1 |   |   |                |        | S          |            |
| <i>Lampranthus stipulaceus</i> (L.) N.E. Br.                                 | Aizoaceae     | NL       | NL   | Acc  | Acc | Acc | Acc  | Acc | 5        |   |   |   | 1 |   |   |   |                |        | S          | O          |
| <i>Lantana camara</i> L.                                                     | Verbenaceae   | Acc      | Acc  | Acc  | Acc | Acc | Acc  | Acc | 1        | 1 | 1 | 1 | 1 | 1 | 1 | 1 |                |        | I          | O          |
| <i>Lapsana communis</i> L.                                                   | Asteraceae    | Acc      | Acc  | Acc  | Acc | Acc | Acc  | Acc | 1        |   | 1 |   | 1 |   |   |   |                | P      |            |            |
| <i>Lasiopogon muscoides</i> (Desf.) DC.                                      | Asteraceae    | Acc      | Acc  | Acc  | Acc | Acc | Acc  | Acc | 2        |   |   |   |   |   | 1 | 1 |                |        | P          |            |
| <i>Lathyrus angulatus</i> L.                                                 | Fabaceae      | Acc      | Acc  | Acc  | Acc | Acc | Acc  | Acc | 3        | 1 | 1 |   | 1 | 1 |   |   |                | P      |            |            |
| <i>Lathyrus annuus</i> L.                                                    | Fabaceae      | Acc      | Acc  | Acc  | Acc | Acc | Acc  | Acc | 8        | 1 | 1 | 1 | 1 | 1 | 1 |   |                |        | P          |            |
| <i>Lathyrus aphaca</i> L.                                                    | Fabaceae      | Acc      | Acc  | Acc  | Acc | Acc | Acc  | Acc | 14       | 1 | 1 |   | 1 | 1 |   |   |                |        | P          |            |
| <i>Lathyrus cicera</i> L.                                                    | Fabaceae      | Acc      | Acc  | Acc  | Acc | Acc | Acc  | Acc | 12       | 1 | 1 |   |   | 1 |   | 1 |                |        | P          |            |
| <i>Lathyrus clymenum</i> L.                                                  | Fabaceae      | Acc      | Acc  | Acc  | Acc | Acc | Acc  | Acc | 19       | 1 | 1 | 1 | 1 | 1 | 1 | 1 |                |        | P          |            |
| <i>Lathyrus ochrus</i> (L.) DC.                                              | Fabaceae      | Acc      | Acc  | Acc  | Acc | Acc | Acc  | Acc | 9        |   |   |   | 1 | 1 |   |   |                |        | P          |            |
| <i>Lathyrus odoratus</i> L.                                                  | Fabaceae      | Acc      | Acc  | Acc  | Acc | Acc | Acc  | Acc | 4        | 1 | 1 | 1 | 1 | 1 |   |   |                |        | S          | O          |
| <i>Lathyrus oleraceus</i> L. subsp. <i>elatius</i> (M.Bieb.) Asch. & Graebn. | Fabaceae      | NL       | Syn  | NL   | Acc | Acc | Syn  | Syn |          |   | 1 | 1 | 1 | 1 | 1 | 1 |                |        | S          | C          |
| <i>Lathyrus sativus</i> L.                                                   | Fabaceae      | Acc      | Acc  | Acc  | Acc | Acc | Acc  | Acc | 21       | 1 | 1 | 1 | 1 | 1 | 1 | 1 |                |        | S          |            |
| <i>Lathyrus setifolius</i> L.                                                | Fabaceae      | Acc      | Acc  | Acc  | Acc | Acc | Acc  | Acc | 8        |   |   |   | 1 |   |   |   |                |        | P          |            |
| <i>Lathyrus sphaericus</i> Retz.                                             | Fabaceae      | Acc      | Acc  | Acc  | Acc | Acc | Acc  | Acc | 8        | 1 | 1 | 1 | 1 | 1 |   |   |                | P      |            |            |
| <i>Lathyrus tingitanus</i> L.                                                | Fabaceae      | Acc      | Acc  | Acc  | Acc | Acc | Acc  | Acc | 6        | 1 | 1 | 1 | 1 | 1 | 1 | 1 |                |        | P          |            |
| <i>Launaea arborescens</i> (Batt.) Murb.                                     | Asteraceae    | Acc      | Acc  | Acc  | Acc | Acc | Acc  | Acc | 6        | 1 | 1 | 1 | 1 | 1 | 1 | 1 |                | S      |            |            |
| <i>Launaea capitata</i> (Spreng.) Dandy                                      | Asteraceae    | Acc      | Acc  | Acc  | Acc | Acc | Acc  | Acc | 6        |   |   |   |   |   | 1 | 1 |                | P      |            |            |

| Species Name                                                                                | Family        | Atlantis | Muer | POWO | WFO  | COL | GBIF | TRY | POWO Syn | H | P | G | T | C | F | L | Endemic Status | Native | Non native | Ornam Crop |
|---------------------------------------------------------------------------------------------|---------------|----------|------|------|------|-----|------|-----|----------|---|---|---|---|---|---|---|----------------|--------|------------|------------|
| <i>Launaea mucronata</i> (Forssk.) Muschl. subsp. <i>mucronata</i>                          | Asteraceae    | Acc      | NL   | Acc  | NL   | Acc | Acc  | NL  | 10       |   |   |   |   |   | 1 |   |                | P      |            |            |
| <i>Launaea nudicaulis</i> (L.) Hook f.                                                      | Asteraceae    | Acc      | Acc  | Acc  | Acc  | Acc | Acc  | Acc | 10       | 1 | 1 | 1 | 1 | 1 | 1 | 1 |                | P      |            |            |
| <i>Laurus novocanariensis</i> Rivas Mart., Lousa, Fern.Prieto, E.Dias, J.C.Costa & C.Aguiar | Lauraceae     | Acc      | Acc  | Acc  | AmUn | Acc | Acc  | Acc | 2        | 1 | 1 | 1 | 1 | 1 | 1 |   | A              | S      |            |            |
| <i>Lavandula brammwellii</i> Upson & S.Andrews                                              | Lamiaceae     | Acc      | Acc  | Acc  | Acc  | Acc | Acc  | Acc | 0        |   |   |   |   | 1 |   |   | C              | S      |            |            |
| <i>Lavandula buchii</i> Webb & Berthel. var. <i>buchii</i>                                  | Lamiaceae     | NL       | Acc  | Acc  | Syn  | Acc | Acc  | NL  | 1        |   |   |   | 1 |   |   |   | T              | S      |            |            |
| <i>Lavandula canariensis</i> (L.) Mill. subsp. <i>canariensis</i>                           | Lamiaceae     | Acc      | Acc  | Acc  | Syn  | Acc | Acc  | NL  | 3        |   |   |   | 1 |   |   |   | T              | S      |            |            |
| <i>Lavandula canariensis</i> (L.) Mill. subsp. <i>canariae</i> Upson & S. Andrews           | Lamiaceae     | Acc      | Acc  | Acc  | NL   | Acc | Acc  | NL  | 0        |   |   |   |   | 1 |   |   | C              | S      |            |            |
| <i>Lavandula canariensis</i> (L.) Mill. subsp. <i>fuerteventurae</i> Upson & S. Andrews     | Lamiaceae     | Acc      | Acc  | Acc  | NL   | Acc | Acc  | NL  | 0        |   |   |   |   |   | 1 |   | F              | S      |            |            |
| <i>Lavandula canariensis</i> (L.) Mill. subsp. <i>gomerensis</i> Upson & S. Andrews         | Lamiaceae     | Acc      | Acc  | Acc  | NL   | Acc | Acc  | NL  | 0        |   |   | 1 |   |   |   |   | G              | S      |            |            |
| <i>Lavandula canariensis</i> (L.) Mill. subsp. <i>hierrensis</i> Upson & S. Andrews         | Lamiaceae     | Acc      | Acc  | Acc  | NL   | Acc | Acc  | NL  | 0        | 1 |   |   |   |   |   |   | H              | S      |            |            |
| <i>Lavandula canariensis</i> (L.) Mill. subsp. <i>lancerottensis</i> Upson & S. Andrews     | Lamiaceae     | Acc      | Acc  | Acc  | NL   | Acc | Acc  | NL  | 0        |   |   |   |   |   |   | 1 | L              | S      |            |            |
| <i>Lavandula canariensis</i> (L.) Mill. subsp. <i>palmensis</i> Upson & S. Andrews          | Lamiaceae     | Acc      | Acc  | Acc  | Acc  | Acc | Acc  | NL  | 0        |   | 1 |   |   |   |   |   | P              | S      |            |            |
| <i>Lavandula dentata</i> L.                                                                 | Lamiaceae     | Acc      | Acc  | Acc  | Acc  | Acc | Acc  | Acc | 1        |   | 1 | 1 | 1 | 1 |   | 1 |                |        | S          | O          |
| <i>Lavandula minutolii</i> Bolle                                                            | Lamiaceae     | Acc      | Acc  | Acc  | Acc  | Acc | Acc  | Acc | 0        |   |   |   | 1 | 1 |   |   | A              | S      |            |            |
| <i>Lavandula pedunculata</i> (Mill.) Cav.                                                   | Lamiaceae     | Acc      | Syn  | Acc  | Acc  | Acc | Acc  | Acc | 1        |   |   |   |   | 1 |   |   |                |        | S          | O          |
| <i>Lavandula pinnata</i> Lundmark                                                           | Lamiaceae     | Acc      | Acc  | Acc  | Acc  | Acc | Acc  | Acc | 3        |   |   |   |   |   | 1 | 1 |                | S      |            |            |
| <i>Lavandula stoechas</i> L. subsp. <i>stoechas</i>                                         | Lamiaceae     | NL       | Acc  | Acc  | Syn  | Acc | Acc  | NL  | 11       |   |   |   | 1 | 1 |   |   |                |        | S          | O          |
| <i>Legousia falcata</i> (Ten.) Fritsch ex Janch.                                            | Campanulaceae | Acc      | Acc  | Acc  | Acc  | Acc | Acc  | Acc | 12       | 1 | 1 | 1 | 1 | 1 |   |   |                | P      |            |            |
| <i>Legousia hybrida</i> (L.) Delarbre                                                       | Campanulaceae | Acc      | Acc  | Acc  | Acc  | Acc | Acc  | Acc | 12       |   |   |   | 1 | 1 |   | 1 |                | P      |            |            |
| <i>Lemna gibba</i> L.                                                                       | Araceae       | Acc      | Acc  | Acc  | Acc  | Acc | Acc  | Acc | 8        | 1 | 1 | 1 | 1 | 1 |   |   |                | P      |            |            |

| Species Name                                                                         | Family         | Atlantis | Muer | POWO | WFO  | COL  | GBIF | TRY | POWO Syn | H | P | G | T | C | F | L | Endemic Status | Native | Non native | Ornam Crop |
|--------------------------------------------------------------------------------------|----------------|----------|------|------|------|------|------|-----|----------|---|---|---|---|---|---|---|----------------|--------|------------|------------|
| <i>Lemna minor</i> L.                                                                | Araceae        | Acc      | Acc  | Acc  | Acc  | Acc  | Acc  | Acc | 11       |   |   | 1 | 1 | 1 | 1 | 1 |                | P      |            |            |
| <i>Lemna minuta</i> Kunth                                                            | Araceae        | Acc      | Acc  | Acc  | Acc  | Acc  | Acc  | Acc | 4        |   |   |   | 1 | 1 |   |   |                |        | I          |            |
| <i>Lens nigricans</i> (M.Bieb.) Godr.                                                | Fabaceae       | Acc      | Acc  | Syn  | Acc  | Acc  | Acc  | Acc | 0        | 1 | 1 |   |   |   |   |   |                |        | P          |            |
| <i>Leonotis nepetifolia</i> (L.) R.Br.                                               | Lamiaceae      | Acc      | Acc  | Acc  | Acc  | Acc  | Acc  | Acc | 3        | 1 | 1 |   | 1 | 1 |   |   |                |        | S          |            |
| <i>Leontodon saxatilis</i> Lam. subsp. <i>rothii</i> Maire                           | Asteraceae     | NL       | NL   | NL   | Acc  | Syn  | Syn  | Acc |          | 1 | 1 | 1 | 1 | 1 | 1 | 1 |                |        | P          |            |
| <i>Leopoldia comosa</i> (L.) Parl.                                                   | Hyacinthaceae  | Syn      | Syn  | Acc  | Acc  | Acc  | Acc  | Acc | 59       | 1 | 1 | 1 | 1 | 1 | 1 | 1 |                | P      |            |            |
| <i>Lepidium bonariense</i> L.                                                        | Brassicaceae   | Acc      | Acc  | Acc  | Acc  | Acc  | Acc  | Acc | 8        |   | 1 | 1 | 1 |   |   |   |                |        | S          |            |
| <i>Lepidium coronopus</i> (L.) Al-Shehbaz                                            | Brassicaceae   | Acc      | Acc  | Acc  | Acc  | Acc  | Acc  | Acc | 25       |   |   |   | 1 | 1 | 1 |   |                |        | P          |            |
| <i>Lepidium didymum</i> L.                                                           | Brassicaceae   | Acc      | Acc  | Acc  | Acc  | Acc  | Acc  | Acc | 32       | 1 | 1 | 1 | 1 | 1 | 1 | 1 |                |        | P          |            |
| <i>Lepidium sativum</i> L.                                                           | Brassicaceae   | Acc      | Acc  | Acc  | Acc  | Acc  | Acc  | Acc | 14       |   |   |   | 1 |   |   |   |                |        | S          |            |
| <i>Lepidium virginicum</i> L.                                                        | Brassicaceae   | Acc      | Acc  | Acc  | Acc  | Acc  | Acc  | Acc | 36       |   | 1 | 1 | 1 |   |   |   |                |        | S          |            |
| <i>Leucaena leucocephala</i> (Lam.) de Wit subsp. <i>glabrata</i> (Rose) Zarate      | Fabaceae       | Acc      | Syn  | Acc  | Acc  | Acc  | Acc  | Acc | 2        | 1 | 1 | 1 | 1 | 1 | 1 | 1 |                |        | I          |            |
| <i>Leucanthemum maximum</i> (Ramond) DC.                                             | Asteraceae     | Acc      | NL   | Acc  | Acc  | Acc  | Acc  | Acc | 11       |   |   |   | 1 |   |   |   |                |        | P          | O          |
| <i>Leuzea cynaroides</i> (C.Sm.) Font Quer ex G.López                                | Asteraceae     | Syn      | Syn  | Acc  | Syn  | Acc  | Syn  | NL  | 6        |   | 1 |   | 1 |   |   |   | A              | S      |            |            |
| <i>Ligustrum lucidum</i> W.T.Aiton                                                   | Oleaceae       | Acc      | Acc  | Acc  | Acc  | Acc  | Acc  | Acc | 12       |   |   |   | 1 | 1 |   |   |                |        | S          | O          |
| <i>Ligustrum vulgare</i> L.                                                          | Oleaceae       | Acc      | Acc  | Acc  | Acc  | Acc  | Syn  | Acc | 11       |   |   |   | 1 |   |   |   |                |        | S          | O          |
| <i>Lilium candidum</i> L.                                                            | Liliaceae      | Acc      | Acc  | Acc  | Acc  | Acc  | Acc  | Acc | 3        |   |   | 1 | 1 | 1 |   |   |                |        | S          | O          |
| <i>Limoniastrum monopetalum</i> (L.) Boiss.                                          | Plumbaginaceae | Acc      | Acc  | Acc  | Acc  | Acc  | Acc  | Acc | 9        |   |   |   |   | 1 | 1 |   |                |        | S          |            |
| <i>Limonium arboreum</i> Erben, A.Santos & Reyes-Bet.                                | Plumbaginaceae | Acc      | Acc  | Acc  | Acc  | Acc  | Acc  | Syn | 3        |   | 1 |   | 1 |   |   |   | A              | S      |            |            |
| <i>Limonium benmageci</i> Marrero Rodr.                                              | Plumbaginaceae | Acc      | Acc  | Acc  | AmUn | Acc  | Acc  | NL  | 0        |   |   |   |   | 1 |   |   | C              | S      |            |            |
| <i>Limonium bollei</i> (Webb ex Wangerin) Erben                                      | Plumbaginaceae | Acc      | Acc  | Acc  | AmUn | Acc  | Acc  | NL  | 1        |   |   |   |   |   | 1 |   | F              | S      |            |            |
| <i>Limonium bourgeai</i> (Webb ex Webb) Kuntze                                       | Plumbaginaceae | Acc      | Acc  | Acc  | Acc  | Acc  | Acc  | Acc | 0        |   |   |   |   |   | 1 | 1 | A              | S      |            |            |
| <i>Limonium brassicifolium</i> (Webb & Berthel.) Kuntze subsp. <i>brassicifolium</i> | Plumbaginaceae | Acc      | NL   | NL   | NL   | AmUn | Acc  | NL  |          |   |   | 1 |   |   |   |   | G              | S      |            |            |



| Species Name                                                                                                  | Family         | Atlantis | Muer | POWO | WFO  | COL  | GBIF | TRY | POWO Syn | H | P | G | T | C | F | L | Endemic Status | Native | Non native | Ornam Crop |
|---------------------------------------------------------------------------------------------------------------|----------------|----------|------|------|------|------|------|-----|----------|---|---|---|---|---|---|---|----------------|--------|------------|------------|
| <i>Limonium brassicifolium</i> (Webb & Berthel.) Kuntze subsp. <i>macropterum</i> (Webb & Berthel.) G. Kunkel | Plumbaginaceae | Acc      | Syn  | Acc  | NL   | Acc  | Syn  | NL  | 2        | 1 |   |   |   |   |   |   | H              | S      |            |            |
| <i>Limonium dendroides</i> Svent.                                                                             | Plumbaginaceae | Acc      | Acc  | Acc  | AmUn | Acc  | Acc  | Acc | 0        |   |   | 1 |   |   |   |   | G              | S      |            |            |
| <i>Limonium frutescens</i> (Lem.) Erben, A.Santos & Reyes-Bet.                                                | Plumbaginaceae | Acc      | Acc  | Acc  | AmUn | Acc  | Acc  | NL  | 3        |   |   |   | 1 |   |   |   | T              | S      |            |            |
| <i>Limonium imbricatum</i> (Webb ex Girard) F.T.Hubb. ex L.H.Bailey                                           | Plumbaginaceae | Acc      | Acc  | Acc  | AmUn | Acc  | Acc  | NL  | 1        |   | 1 |   | 1 |   |   |   | A              | S      |            |            |
| <i>Limonium lobatum</i> (L.f.) Chaz.                                                                          | Plumbaginaceae | Syn      | Syn  | Acc  | Acc  | Syn  | Syn  | Acc | 11       |   |   |   | 1 |   | 1 |   |                | P      |            |            |
| <i>Limonium macrophyllum</i> (Willd. ex Spreng.) Kuntze                                                       | Plumbaginaceae | Acc      | Acc  | Acc  | AmUn | Acc  | Acc  | NL  | 2        |   |   |   | 1 |   |   |   | T              | S      |            |            |
| <i>Limonium ovalifolium</i> (Poir.) Kuntze                                                                    | Plumbaginaceae | NL       | Acc  | Acc  | Acc  | Acc  | Acc  | Acc | 8        |   |   |   |   |   | 1 | 1 |                | P      |            |            |
| <i>Limonium ovalifolium</i> (Poir.) Kuntze subsp. <i>canariense</i> Pignatti                                  | Plumbaginaceae | NL       | Acc  | NL   | NL   | Syn  | Acc  | NL  |          |   |   |   |   |   | 1 | 1 |                | P      |            |            |
| <i>Limonium papillatum</i> (Webb & Berthel.) Kuntze                                                           | Plumbaginaceae | Acc      | Acc  | Acc  | AmUn | Acc  | Acc  | NL  | 2        |   |   |   |   |   | 1 | 1 |                | S      |            |            |
| <i>Limonium pectinatum</i> (Aiton) Kuntze                                                                     | Plumbaginaceae | Acc      | Acc  | Acc  | AmUn | Acc  | Acc  | NL  | 7        | 1 | 1 | 1 | 1 | 1 |   |   | A              | S      |            |            |
| <i>Limonium perezii</i> (Stapf) F.T. Hubb.                                                                    | Plumbaginaceae | Acc      | Acc  | Acc  | Acc  | Acc  | Acc  | Acc | 1        |   |   |   | 1 |   |   |   | T              | S      |            |            |
| <i>Limonium preauxii</i> (Webb & Berthel.) Kuntze                                                             | Plumbaginaceae | Acc      | Acc  | Acc  | AmUn | Acc  | Acc  | NL  | 1        |   |   |   |   | 1 |   |   | C              | S      |            |            |
| <i>Limonium puberulum</i> (Webb ex Lindl.) Kuntze                                                             | Plumbaginaceae | Acc      | Acc  | Acc  | AmUn | Acc  | Acc  | NL  | 1        |   |   |   |   |   | 1 | 1 | A              | S      |            |            |
| <i>Limonium redivivum</i> (Svent.) G.Kunkel & Sunding                                                         | Plumbaginaceae | Acc      | Acc  | Acc  | AmUn | Acc  | Acc  | NL  | 1        |   |   | 1 |   |   |   |   | G              | S      |            |            |
| <i>Limonium relicticum</i> R.Mesa & A.Santos                                                                  | Plumbaginaceae | Acc      | Acc  | Acc  | AmUn | Acc  | Acc  | NL  | 0        |   |   | 1 |   |   |   |   | G              | S      |            |            |
| <i>Limonium sinuatum</i> (L.) Mill. subsp. <i>beaumierianum</i> (Coss. ex Maire) Sauvage & Vindt              | Plumbaginaceae | Acc      | Acc  | NL   | NL   | AmUn | Acc  | NL  |          |   |   |   |   |   |   | 1 |                | P      |            |            |
| <i>Limonium spectabile</i> (Svent.) G.Kunkel & Sunding                                                        | Plumbaginaceae | Acc      | Acc  | Acc  | AmUn | Acc  | Acc  | NL  | 1        |   |   |   | 1 |   |   |   | T              | S      |            |            |
| <i>Limonium sventenii</i> A.Santos & M.Fernandez                                                              | Plumbaginaceae | Acc      | Acc  | Acc  | AmUn | Acc  | Acc  | Acc | 0        |   |   |   |   | 1 |   |   | C              | S      |            |            |
| <i>Limonium tuberculatum</i> (Boiss.) Kuntze                                                                  | Plumbaginaceae | Acc      | Acc  | Acc  | Acc  | Acc  | Acc  | NL  | 1        |   |   |   |   | 1 |   |   |                | S      |            |            |
| <i>Limonium vigoense</i> Marrero Rodr. & R.S.Almeida                                                          | Plumbaginaceae | Acc      | Acc  | Acc  | AmUn | Acc  | Acc  | NL  | 0        |   |   |   |   | 1 |   |   | C              | S      |            |            |
| <i>Linaria arvensis</i> (L.) Desf.                                                                            | Plantaginaceae | Acc      | Acc  | Acc  | Acc  | Acc  | Syn  | Acc | 3        |   |   |   |   | 1 | 1 |   |                | P      |            |            |
| <i>Linaria micrantha</i> (Cav.) Hoffmanns. & Link                                                             | Plantaginaceae | Acc      | Acc  | Acc  | Acc  | Acc  | Acc  | Acc | 3        |   |   | 1 | 1 |   |   | 1 | 1              | P      |            |            |

| Species Name                                                                                    | Family          | Atlantis | Muer | POWO | WFO | COL | GBIF | TRY | POWO Syn | H | P | G | T | C | F | L | Endemic Status | Native | Non native | Ornam Crop |
|-------------------------------------------------------------------------------------------------|-----------------|----------|------|------|-----|-----|------|-----|----------|---|---|---|---|---|---|---|----------------|--------|------------|------------|
| <i>Linaria simplex</i> Desf.                                                                    | Plantaginaceae  | Acc      | Acc  | Acc  | Acc | Acc | Acc  | Acc | 7        |   |   |   | 1 | 1 |   |   |                | P      |            |            |
| <i>Linaria sparteae</i> (L.) Willd.                                                             | Plantaginaceae  | Acc      | Acc  | Acc  | Acc | Acc | Acc  | Acc | 13       | 1 |   |   | 1 |   |   |   |                | P      |            |            |
| <i>Linum bienne</i> Mill.                                                                       | Linaceae        | Acc      | Acc  | Acc  | Acc | Acc | Acc  | Acc | 22       | 1 | 1 | 1 | 1 | 1 |   |   |                |        | P          |            |
| <i>Linum decumbens</i> Desf.                                                                    | Linaceae        | Acc      | Acc  | Acc  | Acc | Acc | Acc  | Acc | 1        |   | 1 |   | 1 |   |   |   |                |        | P          |            |
| <i>Linum strictum</i> L.                                                                        | Linaceae        | Acc      | Acc  | Acc  | Acc | Acc | Acc  | Acc | 19       | 1 | 1 | 1 | 1 | 1 | 1 | 1 |                | P      |            |            |
| <i>Linum trigynum</i> L.                                                                        | Linaceae        | Acc      | NL   | Acc  | Acc | Acc | Acc  | Acc | 7        |   | 1 |   |   |   |   |   |                | P      |            |            |
| <i>Linum usitatissimum</i> L.                                                                   | Linaceae        | Acc      | Acc  | Acc  | Acc | Acc | Acc  | Acc | 16       |   | 1 | 1 | 1 | 1 |   | 1 |                |        | P          | C          |
| <i>Lippia alba</i> (Mill.) N.E.Br. ex Britton & P.Wilson                                        | Verbenaceae     | Acc      | NL   | Acc  | Acc | Acc | Acc  | Acc | 37       |   |   |   | 1 |   |   |   |                |        | S          | O          |
| <i>Lobelia erinus</i> L.                                                                        | Campanulaceae   | Acc      | Acc  | Acc  | Acc | Acc | Acc  | Acc | 50       |   | 1 |   |   | 1 |   |   |                |        | S          | O          |
| <i>Lobularia canariensis</i> (DC.) L. Borgen subsp. <i>canariensis</i>                          | Brassicaceae    | Acc      | Acc  | NL   | Syn | Acc | Acc  | NL  |          |   |   |   | 1 | 1 |   |   | A              | S      |            |            |
| <i>Lobularia canariensis</i> (DC.) L. Borgen subsp. <i>intermedia</i>                           | Brassicaceae    | Acc      | Acc  | Acc  | NL  | Acc | Syn  | NL  | 3        | 1 | 1 | 1 | 1 | 1 |   |   | A              | S      |            |            |
| <i>Lobularia canariensis</i> (DC.) L. Borgen subsp. <i>marginata</i> (Webb) L. Borgen           | Brassicaceae    | Acc      | Acc  | Acc  | Acc | Acc | Acc  | NL  | 2        |   |   |   |   |   | 1 | 1 |                | S      |            |            |
| <i>Lobularia canariensis</i> (DC.) L. Borgen subsp. <i>microsperma</i> L. Borgen                | Brassicaceae    | Acc      | Acc  | Acc  | NL  | Acc | Acc  | NL  | 0        |   |   |   | 1 | 1 |   |   | A              | S      |            |            |
| <i>Lobularia canariensis</i> (DC.) L. Borgen subsp. <i>palmensis</i> (Webb ex Christ) L. Borgen | Brassicaceae    | Acc      | Acc  | Acc  | Acc | Acc | Acc  | Acc | 1        |   | 1 |   | 1 |   |   |   | A              | S      |            |            |
| <i>Lobularia libyca</i> (Viv.) Webb & Berthel.                                                  | Brassicaceae    | Acc      | Acc  | Acc  | Acc | Acc | Acc  | Acc | 10       | 1 | 1 | 1 | 1 | 1 | 1 | 1 |                | P      |            |            |
| <i>Lobularia maritima</i> (L.) Desv.                                                            | Brassicaceae    | Acc      | Acc  | Acc  | Acc | Acc | Acc  | Acc | 26       | 1 | 1 |   | 1 | 1 |   |   |                | P      |            |            |
| <i>Loeflingia hispanica</i> L.                                                                  | Caryophyllaceae | Acc      | Acc  | Acc  | Acc | Acc | Acc  | Acc | 3        |   |   |   |   |   | 1 | 1 |                | P      |            |            |
| <i>Logfia clementei</i> (Willk.) Holub                                                          | Asteraceae      | Syn      | Syn  | Acc  | Syn | Acc | Acc  | Syn | 5        |   |   |   |   |   | 1 | 1 |                | P      |            |            |
| <i>Logfia gallica</i> (L.) Coss. & Germ.                                                        | Asteraceae      | Syn      | Syn  | Acc  | Syn | Acc | Acc  | Syn | 10       | 1 | 1 | 1 | 1 | 1 | 1 | 1 |                | P      |            |            |
| <i>Logfia minima</i> (Sm.) Dumort.                                                              | Asteraceae      | Syn      | Syn  | Acc  | Acc | Acc | Acc  | Syn | 11       | 1 |   |   | 1 |   |   |   |                | P      |            |            |
| <i>Lolium arundinaceum</i> (Schreb.) Darbysh. subsp. <i>arundinaceum</i>                        | Poaceae         | Syn      | Acc  | Acc  | NL  | Syn | Syn  | NL  | 41       |   | 1 |   | 1 |   | 1 |   |                | P      |            |            |

| Species Name                                                                                          | Family         | Atlantis | Muer | POWO | WFO | COL  | GBIF | TRY | POWO Syn | H | P | G | T | C | F | L | Endemic Status | Native | Non native | Ornam Crop |
|-------------------------------------------------------------------------------------------------------|----------------|----------|------|------|-----|------|------|-----|----------|---|---|---|---|---|---|---|----------------|--------|------------|------------|
| <i>Lolium atlantigenum</i> (St.-Yves) Banfi, Galasso, Foggi, Kopecký & Ardenghi                       | Poaceae        | Acc      | Acc  | Acc  | NL  | AmUn | Acc  | NL  | 4        |   | 1 |   |   |   |   |   |                |        | P          |            |
| <i>Lolium canariense</i> Steud.                                                                       | Poaceae        | Acc      | Acc  | Acc  | Acc | Acc  | Acc  | Acc | 3        | 1 | 1 | 1 | 1 | 1 | 1 | 1 | A              | S      |            |            |
| <i>Lolium edwardii</i> H.Scholz, Stierst. & Gaisberg                                                  | Poaceae        | Acc      | Acc  | Syn  | Syn | Syn  | Syn  | Syn |          | 1 |   | 1 | 1 |   |   |   | A              | S      |            |            |
| <i>Lolium interruptum</i> (Desf.) Banfi, Galasso, Foggi, Kopecký & Ardenghi                           | Poaceae        | Acc      | NL   | Acc  | NL  | AmUn | Acc  | NL  | 4        |   | 1 |   |   |   | 1 |   |                |        | P          |            |
| <i>Lolium mediterraneum</i> Schreb.                                                                   | Poaceae        | Acc      | NL   | Acc  | NL  | AmUn | Acc  | Syn | 9        |   | 1 |   |   |   |   |   |                |        | P          |            |
| <i>Lolium multiflorum</i> Lam.                                                                        | Poaceae        | Acc      | Acc  | Acc  | Acc | Acc  | Acc  | Acc | 15       | 1 | 1 | 1 | 1 | 1 | 1 | 1 |                |        | P          |            |
| <i>Lolium perenne</i> L.                                                                              | Poaceae        | Acc      | Acc  | Acc  | Acc | Acc  | Acc  | Acc | 31       | 1 | 1 | 1 | 1 | 1 | 1 | 1 |                |        | P          |            |
| <i>Lolium remotum</i> Schrank                                                                         | Poaceae        | Acc      | Acc  | Acc  | Acc | Acc  | Acc  | Acc | 3        | 1 | 1 |   | 1 | 1 |   |   |                | P      |            |            |
| <i>Lolium rigidum</i> Gaudin                                                                          | Poaceae        | Acc      | Acc  | Acc  | Acc | Acc  | Acc  | Acc | 29       | 1 | 1 | 1 | 1 | 1 | 1 | 1 |                | P      |            |            |
| <i>Lolium saxatile</i> H.Scholz & S.Scholz                                                            | Poaceae        | Acc      | Acc  | Acc  | Acc | Acc  | Acc  | Acc | 0        |   |   |   |   |   | 1 | 1 |                | S      |            |            |
| <i>Lolium temulentum</i> L.                                                                           | Poaceae        | Acc      | Acc  | Acc  | Acc | Acc  | Acc  | Acc | 32       | 1 |   |   | 1 | 1 | 1 |   |                | P      |            |            |
| <i>Lonicera etrusca</i> Santi                                                                         | Caprifoliaceae | Acc      | Acc  | Acc  | Acc | Acc  | Acc  | Acc | 15       |   |   |   | 1 |   |   |   |                |        | S          |            |
| <i>Lonicera japonica</i> Thunb                                                                        | Caprifoliaceae | Acc      | Acc  | Acc  | Acc | Acc  | Acc  | Acc | 19       |   |   |   | 1 |   |   |   |                |        | I          | O          |
| <i>Lonicera ligustrina</i> Wall.                                                                      | Caprifoliaceae | Syn      | Syn  | Acc  | Acc | Acc  | Acc  | Acc | 7        |   |   | 1 |   | 1 |   |   |                |        | S          | O          |
| <i>Lophocereus schottii</i> (Engelm.) Britton & Rose                                                  | Cactaceae      | Acc      | NL   | Acc  | Acc | Syn  | Syn  | Acc | 25       |   |   |   |   | 1 |   |   |                |        | S          | O          |
| <i>Lotus angustissimus</i> L.                                                                         | Fabaceae       | Acc      | Acc  | Acc  | Acc | Acc  | Acc  | NL  | 14       |   | 1 |   | 1 | 1 |   |   |                |        | P          |            |
| <i>Lotus arinagensis</i> Bramwell                                                                     | Fabaceae       | Acc      | Acc  | Acc  | Acc | Acc  | Acc  | NL  | 0        |   |   |   |   | 1 |   |   | C              | S      |            |            |
| <i>Lotus berthelotii</i> Masf.                                                                        | Fabaceae       | Acc      | Acc  | Acc  | Acc | Acc  | Acc  | Acc | 3        |   |   |   | 1 |   |   |   | T              | S      |            |            |
| <i>Lotus broussonetii</i> Choisy ex Ser.                                                              | Fabaceae       | Syn      | Syn  | Acc  | Acc | Acc  | Acc  | NL  | 2        |   |   |   | 1 | 1 |   |   | A              | S      |            |            |
| <i>Lotus callis-viridis</i> Bramwell & D.H.Davis                                                      | Fabaceae       | Acc      | Acc  | Acc  | Acc | Acc  | Acc  | NL  | 0        |   |   |   |   | 1 |   |   | C              | S      |            |            |
| <i>Lotus campylocladus</i> Webb & Berthel. subsp. <i>campylocladus</i>                                | Fabaceae       | Acc      | Acc  | Acc  | NL  | AmUn | Acc  | NL  | 0        |   |   |   | 1 |   |   |   | T              | S      |            |            |
| <i>Lotus campylocladus</i> Webb & Berthel. subsp. <i>hillebrandii</i> (Christ) Sandral & D.D.Sokoloff | Fabaceae       | Acc      | Acc  | Acc  | Syn | NL   | Syn  | NL  | 1        | 1 |   |   |   |   |   |   | H              | S      |            |            |

| Species Name                                                                             | Family   | Atlantis | Muer | POWO | WFO  | COL  | GBIF | TRY | POWO Syn | H | P | G | T | C | F | L | Endemic Status | Native | Non native | Ornam Crop |
|------------------------------------------------------------------------------------------|----------|----------|------|------|------|------|------|-----|----------|---|---|---|---|---|---|---|----------------|--------|------------|------------|
| <i>Lotus corniculatus</i> L.                                                             | Fabaceae | NL       | NL   | Acc  | Acc  | Acc  | Acc  | Acc | 0        |   | 1 |   |   |   |   | 1 |                | S      |            |            |
| <i>Lotus creticus</i> L.                                                                 | Fabaceae | NL       | Acc  | Acc  | Acc  | Acc  | Acc  | Acc | 10       |   |   | 1 |   |   | 1 |   |                | P      |            |            |
| <i>Lotus dumetorum</i> R.P.Murray                                                        | Fabaceae | Acc      | Acc  | Acc  | Acc  | Acc  | Acc  | NL  | 0        |   |   |   | 1 |   |   |   | T              | S      |            |            |
| <i>Lotus emerooides</i> R.P.Murray                                                       | Fabaceae | Acc      | Acc  | Acc  | Acc  | Acc  | Acc  | NL  | 1        |   |   | 1 |   |   |   |   | G              | S      |            |            |
| <i>Lotus eremiticus</i> A.Santos                                                         | Fabaceae | Acc      | Acc  | Acc  | Acc  | Acc  | Acc  | NL  | 1        |   | 1 |   |   |   |   |   | P              | S      |            |            |
| <i>Lotus eriophthalmus</i> Webb & Berthel.                                               | Fabaceae | Syn      | Syn  | Acc  | Acc  | Acc  | Acc  | NL  | 1        | 1 | 1 | 1 | 1 | 1 |   |   | A              | S      |            |            |
| <i>Lotus glaucus</i> Sol.                                                                | Fabaceae | Acc      | NL   | Acc  | Acc  | Acc  | Acc  | Acc | 1        | 1 | 1 | 1 | 1 | 1 | 1 |   |                | S      |            |            |
| <i>Lotus glinoides</i> Delile                                                            | Fabaceae | Acc      | Acc  | Acc  | Acc  | Acc  | Acc  | Acc | 3        | 1 |   | 1 | 1 | 1 | 1 | 1 |                |        | P          |            |
| <i>Lotus gomerythus</i> A. Portero, J. Martín-Carbajal & R. Mesa                         | Fabaceae | Acc      | NL   | NL   | NL   | AmUn | Acc  | NL  |          |   |   | 1 |   |   |   |   | G              | S      |            |            |
| <i>Lotus holosericeus</i> Webb & Berthel.                                                | Fabaceae | Acc      | Acc  | Acc  | Acc  | AmUn | Acc  | NL  | 0        |   |   |   |   | 1 |   |   | C              | S      |            |            |
| <i>Lotus kunkelii</i> (Esteve) Bramwell & D.H.Davis                                      | Fabaceae | Acc      | Acc  | Acc  | Acc  | Acc  | Acc  | NL  | 1        |   |   |   |   | 1 |   |   | C              | S      |            |            |
| <i>Lotus lancerottensis</i> Webb & Berthel.                                              | Fabaceae | Acc      | Acc  | Acc  | Acc  | Acc  | Acc  | Acc | 2        |   |   |   |   |   | 1 | 1 |                | S      |            |            |
| <i>Lotus maculatus</i> Breidf.                                                           | Fabaceae | Acc      | Acc  | Acc  | Acc  | Acc  | Acc  | NL  | 1        |   |   |   | 1 |   | 1 |   | A              | S      |            |            |
| <i>Lotus mascaensis</i> Burchard                                                         | Fabaceae | Acc      | Acc  | Acc  | Acc  | Acc  | Acc  | Acc | 0        |   |   |   | 1 |   |   |   | T              | S      |            |            |
| <i>Lotus ornithopodioides</i> L.                                                         | Fabaceae | Acc      | Acc  | Acc  | Acc  | Acc  | Acc  | Acc | 2        |   |   |   |   | 1 |   |   |                |        | P          |            |
| <i>Lotus parviflorus</i> Desf.                                                           | Fabaceae | Acc      | Acc  | Acc  | Acc  | Acc  | Acc  | Acc | 5        |   |   |   |   | 1 | 1 |   |                | P      |            |            |
| <i>Lotus pedunculatus</i> Cav.                                                           | Fabaceae | Acc      | NL   | Acc  | Acc  | Acc  | Acc  | Acc | 0        |   |   |   | 1 |   |   |   |                |        | P          |            |
| <i>Lotus pyranthus</i> P.Perez                                                           | Fabaceae | Acc      | Acc  | Acc  | Acc  | Acc  | Acc  | NL  | 1        |   | 1 |   |   |   |   |   | P              | S      |            |            |
| <i>Lotus sessilifolius</i> DC. subsp. <i>sessilifolius</i>                               | Fabaceae | Acc      | Acc  | Acc  | NL   | AmUn | Acc  | NL  | 2        |   | 1 | 1 | 1 | 1 |   |   | A              | S      |            |            |
| <i>Lotus sessilifolius</i> DC. subsp. <i>villosissimus</i> (Pit.) Sandral & D.D.Sokoloff | Fabaceae | Acc      | Acc  | Acc  | NL   | AmUn | Acc  | NL  | 1        | 1 |   |   |   |   |   |   | H              | S      |            |            |
| <i>Lotus spartioides</i> Webb & Berthel.                                                 | Fabaceae | Acc      | Acc  | Acc  | Acc  | Acc  | Acc  | Acc | 0        |   |   |   |   | 1 |   |   | C              | S      |            |            |
| <i>Lotus spectabilis</i> Choisy ex Ser.                                                  | Fabaceae | Syn      | Syn  | Acc  | Acc  | Acc  | Acc  | Acc | 1        |   |   |   | 1 |   |   |   | T              | S      |            |            |
| <i>Lotus tenellus</i> (Lowe) Sandral, A.Santos & D.D.Sokoloff                            | Fabaceae | Acc      | Acc  | Acc  | AmUn | AmUn | Acc  | NL  | 1        |   |   |   | 1 | 1 |   |   | A              | S      |            |            |

| Species Name                                             | Family        | Atlantis | Muer | POWO | WFO  | COL | GBIF | TRY | POWO Syn | H | P | G | T | C | F | L | Endemic Status | Native | Non native | Ornam Crop |
|----------------------------------------------------------|---------------|----------|------|------|------|-----|------|-----|----------|---|---|---|---|---|---|---|----------------|--------|------------|------------|
| <i>Lotus tetragonolobus</i> L.                           | Fabaceae      | Acc      | Acc  | Acc  | Acc  | Acc | Acc  | Acc | 10       |   |   |   | 1 | 1 |   |   |                |        | P          |            |
| <i>Lunaria annua</i> L.                                  | Brassicaceae  | Acc      | Acc  | Acc  | Acc  | Acc | Acc  | Acc | 9        |   |   |   |   | 1 |   |   |                |        | S          | O          |
| <i>Lupinus albus</i> L.                                  | Fabaceae      | Acc      | Acc  | Acc  | Acc  | Acc | Acc  | Acc | 0        | 1 | 1 | 1 | 1 | 1 |   |   |                |        | S          | O          |
| <i>Lupinus angustifolius</i> L.                          | Fabaceae      | Acc      | Acc  | Acc  | Acc  | Acc | Acc  | Acc | 32       | 1 | 1 |   | 1 | 1 |   |   |                |        | S          | O          |
| <i>Lupinus luteus</i> L.                                 | Fabaceae      | Acc      | Acc  | Acc  | Acc  | Acc | Acc  | Acc | 26       |   |   |   | 1 |   |   |   |                |        | S          | O          |
| <i>Lupinus pilosus</i> L.                                | Fabaceae      | Acc      | Acc  | Acc  | Acc  | Acc | Acc  | Acc | 1        |   | 1 |   | 1 |   |   |   |                | P      |            |            |
| <i>Luzula canariensis</i> Poir.                          | Juncaceae     | Acc      | Acc  | Acc  | Acc  | Acc | Acc  | Acc | 1        |   |   | 1 | 1 |   |   |   | A              | S      |            |            |
| <i>Luzula elegans</i> Lowe                               | Juncaceae     | Acc      | Acc  | Acc  | Acc  | Acc | Acc  | Acc | 3        | 1 | 1 | 1 | 1 | 1 |   |   |                | S      |            |            |
| <i>Luzula forsteri</i> (Sm.) DC.                         | Juncaceae     | Acc      | Acc  | Acc  | Acc  | Acc | Acc  | Acc | 5        |   |   | 1 | 1 | 1 |   |   |                | P      |            |            |
| <i>Luzula pilosa</i> (L.) Willd.                         | Juncaceae     | Acc      | Acc  | Acc  | Acc  | Acc | Acc  | Acc | 9        |   |   |   | 1 |   |   |   |                | P      |            |            |
| <i>Lycium europaeum</i> L.                               | Solanaceae    | Acc      | Acc  | Acc  | Acc  | Acc | Acc  | Acc | 10       |   | 1 | 1 | 1 |   |   |   |                |        | I          |            |
| <i>Lycium intricatum</i> Boiss.                          | Solanaceae    | Acc      | Acc  | Acc  | Syn  | Syn | Syn  | Acc | 0        |   | 1 | 1 | 1 | 1 | 1 | 1 |                | S      |            |            |
| <i>Lysimachia arvensis</i> (L.) U. Manns & Anderb.       | Primulaceae   | Acc      | Syn  | Acc  | AmUn | Acc | Acc  | Syn | 22       | 1 | 1 | 1 | 1 | 1 | 1 | 1 |                | P      |            |            |
| <i>Lysimachia foemina</i> (Mill.) U. Manns & Anderb.     | Primulaceae   | Acc      | Syn  | Acc  | AmUn | Acc | Acc  | Syn | 1        |   |   |   | 1 |   |   |   |                | P      |            |            |
| <i>Lysimachia linum-stellatum</i> L.                     | Primulaceae   | Acc      | Acc  | Acc  | Acc  | Acc | Acc  | Acc | 5        | 1 | 1 | 1 | 1 | 1 | 1 | 1 |                | P      |            |            |
| <i>Lysimachia wildpretii</i> (Valdés) U. Manns & Anderb. | Primulaceae   | Acc      | Acc  | Acc  | AmUn | Acc | Acc  | Acc | 1        | 1 | 1 |   | 1 | 1 | 1 | 1 |                | S      |            |            |
| <i>Lythrum hyssopifolia</i> L.                           | Lythraceae    | Acc      | Acc  | Acc  | Acc  | Acc | Acc  | Acc | 14       | 1 | 1 | 1 | 1 | 1 | 1 | 1 |                |        | P          |            |
| <i>Lythrum junceum</i> Banks & Sol.                      | Lythraceae    | Acc      | Acc  | Acc  | Acc  | Acc | Acc  | Acc | 3        |   | 1 | 1 | 1 | 1 |   |   |                |        | P          |            |
| <i>Maclura pomifera</i> (Raf.) C.K.Schneid.              | Moraceae      | Acc      | Acc  | Acc  | Acc  | Acc | Acc  | Acc | 8        |   |   |   |   | 1 |   |   |                |        | S          | O          |
| <i>Macrochloa tenacissima</i> (L.) Kunth.                | Poaceae       | Acc      | Acc  | Acc  | Syn  | Syn | Syn  | Syn | 2        |   |   |   |   |   | 1 |   |                |        | S          |            |
| <i>Maireana brevifolia</i> (R.Br.) Paul G. Wilson        | Amaranthaceae | Acc      | Acc  | Acc  | Acc  | Acc | Acc  | Acc | 7        |   |   |   |   | 1 | 1 | 1 |                |        | S          |            |
| <i>Mairetis microsperma</i> (Boiss.) I.M.Johnst.         | Boraginaceae  | Acc      | Acc  | Acc  | AmUn | Acc | Acc  | NL  | 3        |   |   |   | 1 | 1 | 1 | 1 |                | S      |            |            |
| <i>Malcolmia maritima</i> (L.) Aiton                     | Brassicaceae  | Acc      | Acc  | Acc  | Acc  | Acc | Acc  | Acc | 7        |   | 1 |   | 1 | 1 | 1 | 1 |                | P      |            |            |
| <i>Malephora crocea</i> (Jacq.) Schwantes                | Aizoaceae     | Acc      | Acc  | Acc  | Acc  | Acc | Acc  | Acc | 4        |   |   | 1 | 1 | 1 | 1 | 1 |                |        | S          | O          |

| Species Name                                                                                     | Family        | Atlantis | Muer | POWO | WFO  | COL  | GBIF | TRY | POWO Syn | H | P | G | T | C | F | L | Endemic Status | Native | Non native | Ornam Crop |
|--------------------------------------------------------------------------------------------------|---------------|----------|------|------|------|------|------|-----|----------|---|---|---|---|---|---|---|----------------|--------|------------|------------|
| <i>Malva acerifolia</i> (Cav.) Alef. var. <i>acerifolia</i>                                      | Malvaceae     | NL       | Syn  | NL   | NL   | NL   | Acc  | Syn |          |   | 1 | 1 | 1 | 1 |   |   | A              | S      |            |            |
| <i>Malva alcea</i> L.                                                                            | Malvaceae     | Acc      | Acc  | Acc  | Acc  | Acc  | Acc  | Acc | 19       | 1 |   |   | 1 |   |   |   |                |        | P          |            |
| <i>Malva arborea</i> (L.) Webb & Berthel.                                                        | Malvaceae     | Syn      | Acc  | Acc  | Acc  | AmUn | Acc  | Acc | 10       | 1 | 1 | 1 | 1 | 1 | 1 | 1 |                |        | S          | O          |
| <i>Malva durieui</i> Spach                                                                       | Malvaceae     | Syn      | Syn  | Acc  | Acc  | Syn  | Syn  | Acc | 6        |   |   |   | 1 |   |   |   |                |        | S          |            |
| <i>Malva longiflora</i> (Boiss. & Reut.) Soldano, Banfi & Galasso                                | Malvaceae     | Syn      | Syn  | Acc  | Syn  | Acc  | Acc  | Syn | 2        |   |   |   | 1 |   |   |   |                |        | S          |            |
| <i>Malva multiflora</i> (Cav.) Soldano, Banfi & Galasso                                          | Malvaceae     | Syn      | Syn  | Acc  | Acc  | Acc  | Acc  | Acc | 25       | 1 | 1 | 1 | 1 | 1 | 1 | 1 |                | P      |            |            |
| <i>Malva neglecta</i> Wallr.                                                                     | Malvaceae     | Acc      | Acc  | Acc  | Acc  | Acc  | Acc  | Acc | 5        | 1 |   |   | 1 | 1 | 1 | 1 |                | P      |            |            |
| <i>Malva nicaeensis</i> All.                                                                     | Malvaceae     | Acc      | Acc  | Acc  | Acc  | Acc  | Acc  | Acc | 6        |   | 1 | 1 | 1 | 1 | 1 | 1 |                | P      |            |            |
| <i>Malva parviflora</i> L.                                                                       | Malvaceae     | Acc      | Acc  | Acc  | Acc  | Acc  | Acc  | Acc | 15       | 1 | 1 | 1 | 1 | 1 | 1 | 1 |                | P      |            |            |
| <i>Malva phoenicea</i> (Vent.) Alef.                                                             | Malvaceae     | Syn      | Syn  | Acc  | AmUn | Syn  | Acc  | NL  | 6        |   |   |   | 1 |   |   |   | T              | S      |            |            |
| <i>Malva pusilla</i> Sm.                                                                         | Malvaceae     | Acc      | Acc  | Acc  | Acc  | Acc  | Acc  | Acc | 14       | 1 |   |   | 1 |   |   |   |                | P      |            |            |
| <i>Malvastrum corchorifolium</i> (Desr.) Britton ex Small                                        | Malvaceae     | Acc      | NL   | Acc  | Acc  | Acc  | Acc  | Acc | 4        |   | 1 |   | 1 | 1 |   |   |                |        | S          |            |
| <i>Malvastrum coromandelianum</i> (L.) Garcke subsp. <i>coromandelianum</i>                      | Malvaceae     | Acc      | NL   | NL   | Syn  | Acc  | Acc  | Syn |          |   | 1 |   |   | 1 |   |   |                |        | S          |            |
| <i>Malvastrum coromandelianum</i> (L.) Garcke subsp. <i>capitatospicatum</i> (Kuntze) S. R. Hill | Malvaceae     | Acc      | NL   | Acc  | NL   | AmUn | Acc  | NL  | 1        |   | 1 |   |   |   |   |   |                |        | S          |            |
| <i>Malvaviscus arboreus</i> Cav.                                                                 | Malvaceae     | NL       | NL   | Acc  | Acc  | Acc  | Acc  | Acc | 44       |   |   |   | 1 | 1 |   |   |                |        | S          | O          |
| <i>Mangifera indica</i> L.                                                                       | Anacardiaceae | NL       | NL   | Acc  | Acc  | Acc  | Acc  | Acc | 21       |   | 1 | 1 | 1 |   |   |   |                |        | S          | C          |
| <i>Marcetella moquiniana</i> (Webb & Berthel.) Svent.                                            | Rosaceae      | Acc      | Acc  | Acc  | AmUn | Acc  | Acc  | NL  | 0        |   |   | 1 | 1 | 1 |   |   | A              | S      |            |            |
| <i>Marcus-kochia littorea</i> (L.) Al-Shehbaz                                                    | Brassicaceae  | Syn      | Syn  | Acc  | Syn  | NL   | Acc  | Syn | 11       |   |   |   |   |   |   | 1 |                | P      |            |            |
| <i>Marrubium vulgare</i> L.                                                                      | Lamiaceae     | Acc      | Acc  | Acc  | Acc  | Acc  | Acc  | Acc | 9        | 1 | 1 | 1 | 1 | 1 | 1 | 1 |                | P      |            |            |
| <i>Marsilea quadrifolia</i> L.                                                                   | Marsilenaceae | Acc      | Acc  | Acc  | Acc  | Acc  | Acc  | Acc | 8        |   |   |   |   | 1 |   |   |                |        | S          |            |
| <i>Matricaria chamomilla</i> Blanco                                                              | Asteraceae    | Acc      | Acc  | Acc  | AmUn | Acc  | Acc  | Acc | 49       | 1 | 1 | 1 | 1 | 1 | 1 | 1 |                |        | S          | C          |
| <i>Matthiola bolleana</i> Webb ex Christ subsp. <i>bolleana</i>                                  | Brassicaceae  | Acc      | NL   | NL   | NL   | NL   | Acc  | NL  |          |   |   |   |   |   | 1 | 1 | A              | P      |            |            |

| Species Name                                                                             | Family         | Atlantis | Muer | POWO | WFO | COL | GBIF | TRY | POWO Syn | H | P | G | T | C | F | L | Endemic Status | Native | Non native | Ornam Crop |
|------------------------------------------------------------------------------------------|----------------|----------|------|------|-----|-----|------|-----|----------|---|---|---|---|---|---|---|----------------|--------|------------|------------|
| <i>Matthiola bolleana</i> Webb ex Christ subsp. <i>morocera</i> (Christ) Reyes-Betancort | Brassicaceae   | Acc      | NL   | Acc  | NL  | NL  | Acc  | NL  | 1        |   |   |   | 1 | 1 |   |   | A              | P      |            |            |
| <i>Matthiola bolleana</i> Webb ex Christ subsp. <i>viridis</i> (Conti) Reyes-Bet.        | Brassicaceae   | Acc      | Syn  | Acc  | NL  | NL  | Acc  | NL  | 1        |   |   |   |   |   | 1 | 1 |                | P      |            |            |
| <i>Matthiola incana</i> (L.) R.Br. subsp. <i>incana</i>                                  | Brassicaceae   | Acc      | Acc  | NL   | NL  | Acc | Acc  | NL  |          |   | 1 | 1 | 1 | 1 |   | 1 |                |        | S          |            |
| <i>Matthiola parviflora</i> (Schousb.) R.Br. in W. T. Aiton                              | Brassicaceae   | Acc      | Acc  | Acc  | Acc | Acc | Acc  | Acc | 3        | 1 | 1 | 1 | 1 | 1 | 1 | 1 |                | P      |            |            |
| <i>Maurandya barclayana</i> Lindl.                                                       | Plantaginaceae | NL       | NL   | Acc  | Acc | Acc | Acc  | Acc | 2        |   | 1 |   |   |   |   |   |                |        | S          | O          |
| <i>Maurandya scandens</i> (Cav.) Pers.                                                   | Plantaginaceae | Acc      | Acc  | Acc  | Acc | Acc | Acc  | Acc | 3        |   | 1 | 1 | 1 |   |   |   |                |        | S          | O          |
| <i>Medicago arabica</i> (L.) Huds.                                                       | Fabaceae       | Acc      | Acc  | Acc  | Acc | Acc | Acc  | Acc | 10       |   | 1 |   | 1 | 1 |   |   |                |        | P          |            |
| <i>Medicago arborea</i> L.                                                               | Fabaceae       | Acc      | Acc  | Acc  | Acc | Acc | Acc  | Acc | 3        | 1 |   |   |   |   |   |   |                |        | S          |            |
| <i>Medicago intertexta</i> (L.) Mill. subsp. <i>intertexta</i>                           | Fabaceae       | Acc      | NL   | NL   | Syn | Acc | Acc  | Acc |          |   |   |   |   | 1 | 1 |   |                |        | P          |            |
| <i>Medicago intertexta</i> (L.) Mill. subsp. <i>ciliaris</i> (L.) Ponert                 | Fabaceae       | Acc      | Syn  | Acc  | Acc | Acc | Acc  | Acc | 0        |   |   |   | 1 | 1 |   |   |                |        | P          |            |
| <i>Medicago laciniata</i> (L.) Mill.                                                     | Fabaceae       | Acc      | Acc  | Acc  | Acc | Acc | Acc  | Acc | 8        | 1 | 1 | 1 | 1 | 1 | 1 | 1 |                | S      |            |            |
| <i>Medicago littoralis</i> Loisel                                                        | Fabaceae       | Acc      | Acc  | Acc  | Acc | Acc | Acc  | Acc | 11       | 1 |   | 1 | 1 | 1 | 1 | 1 |                | S      |            |            |
| <i>Medicago lupulina</i> L.                                                              | Fabaceae       | Acc      | Acc  | Acc  | Acc | Acc | Acc  | Acc | 23       | 1 | 1 |   | 1 | 1 |   |   |                |        | P          |            |
| <i>Medicago marina</i> L.                                                                | Fabaceae       | Acc      | Acc  | Acc  | Acc | Acc | Acc  | Acc | 4        |   |   |   | 1 |   |   |   |                |        | P          |            |
| <i>Medicago minima</i> (L.) L.                                                           | Fabaceae       | Acc      | Acc  | Acc  | Acc | Acc | Acc  | Acc | 27       | 1 | 1 | 1 | 1 | 1 | 1 | 1 |                | P      |            |            |
| <i>Medicago monspeliaca</i> (L.) Trautv.                                                 | Fabaceae       | Syn      | Syn  | Acc  | Acc | Acc | Acc  | Acc | 7        |   |   |   |   |   |   | 1 |                | P      |            |            |
| <i>Medicago orbicularis</i> (L.) Bartal.                                                 | Fabaceae       | Acc      | Acc  | Acc  | Acc | Acc | Acc  | Acc | 15       |   | 1 |   | 1 | 1 | 1 | 1 |                |        | P          |            |
| <i>Medicago polymorpha</i> L.                                                            | Fabaceae       | Acc      | Acc  | Acc  | Acc | Acc | Acc  | Acc | 69       | 1 | 1 | 1 | 1 | 1 | 1 | 1 |                | P      |            |            |
| <i>Medicago sativa</i> L.                                                                | Fabaceae       | Acc      | Acc  | Acc  | Acc | Acc | Acc  | Acc | 1        | 1 | 1 |   | 1 | 1 | 1 | 1 |                |        | S          | C          |
| <i>Medicago soleirolii</i> Duby                                                          | Fabaceae       | Acc      | Acc  | Acc  | Acc | Acc | Acc  | Acc | 1        |   |   |   |   | 1 |   | 1 |                | P      |            |            |
| <i>Medicago tornata</i> (L.) Mill. subsp. <i>helix</i> (Willd.) Ooststr. & Reichg.       | Fabaceae       | Acc      | NL   | NL   | Acc | Acc | Acc  | Acc |          | 1 |   | 1 | 1 | 1 | 1 | 1 |                | P      |            |            |
| <i>Medicago truncatula</i> Gaertn.                                                       | Fabaceae       | Acc      | Acc  | Acc  | Acc | Acc | Acc  | Acc | 11       | 1 | 1 | 1 | 1 | 1 |   | 1 |                | P      |            |            |

| Species Name                                                | Family        | Atlantis | Muer | POWO | WFO  | COL | GBIF | TRY | POWO Syn | H | P | G | T | C | F | L | Endemic Status | Native | Non native | Ornam Crop |
|-------------------------------------------------------------|---------------|----------|------|------|------|-----|------|-----|----------|---|---|---|---|---|---|---|----------------|--------|------------|------------|
| <i>Medicago turbinata</i> (L.) All.                         | Fabaceae      | Acc      | Acc  | Acc  | Acc  | Acc | Acc  | Acc | 10       |   |   | 1 |   |   |   |   |                |        | P          |            |
| <i>Megaskepasma erythrochlamys</i> Lindau                   | Acanthaceae   | NL       | NL   | Acc  | Acc  | Acc | Acc  | Acc | 1        |   |   |   |   |   |   | 1 |                |        | S          | O          |
| <i>Megathyrsus maximus</i> (Jacq.) B.K.Simon & S.W.L.Jacobs | Poaceae       | Acc      | Acc  | Acc  | Syn  | Syn | Syn  | Syn | 33       |   | 1 | 1 | 1 | 1 |   |   |                |        | S          |            |
| <i>Melampodium montanum</i> Benth.                          | Asteraceae    | NL       | NL   | Acc  | Acc  | Acc | Acc  | Acc | 2        |   | 1 |   |   |   |   |   |                |        | S          |            |
| <i>Melia azedarach</i> L.                                   | Meliaceae     | Acc      | Acc  | Acc  | Acc  | Acc | Acc  | Acc | 39       | 1 | 1 |   | 1 | 1 |   |   |                |        | I          | O          |
| <i>Melianthus comosus</i> Vahl                              | Melanthaceae  | Acc      | NL   | Acc  | Acc  | Acc | Acc  | Acc | 1        |   |   |   |   |   | 1 |   |                |        | S          | O          |
| <i>Melica canariensis</i> W.Hempel                          | Poaceae       | Acc      | Acc  | Acc  | Acc  | Acc | Acc  | Acc | 0        |   |   | 1 | 1 | 1 | 1 | 1 |                | S      |            |            |
| <i>Melica teneriffae</i> Hack. ex Christ                    | Poaceae       | Acc      | Acc  | Acc  | Acc  | Acc | Acc  | Acc | 0        |   |   | 1 | 1 | 1 |   | 1 | A              | S      |            |            |
| <i>Melilotus albus</i> Medik.                               | Fabaceae      | Acc      | Acc  | Acc  | Acc  | Acc | Acc  | Acc | 20       |   | 1 |   |   | 1 |   |   |                |        | S          |            |
| <i>Melilotus indicus</i> (L.) All.                          | Fabaceae      | Acc      | Acc  | Acc  | Acc  | Acc | Acc  | Acc | 22       | 1 | 1 | 1 | 1 | 1 | 1 | 1 |                |        | S          |            |
| <i>Melilotus infestus</i> Guss.                             | Fabaceae      | Acc      | Acc  | Acc  | Acc  | Acc | Acc  | Acc | 4        | 1 |   |   |   |   |   |   |                |        | S          |            |
| <i>Melilotus officinalis</i> (L.) Lam.                      | Fabaceae      | Acc      | NL   | Acc  | AmUn | Acc | Acc  | Acc | 44       |   |   |   |   | 1 |   |   |                |        | S          |            |
| <i>Melilotus segetalis</i> (Brot.) Ser.                     | Fabaceae      | NL       | NL   | Acc  | Acc  | Acc | Acc  | Acc | 6        |   |   |   | 1 | 1 | 1 |   |                | P      |            |            |
| <i>Melilotus sulcatus</i> Desf.                             | Fabaceae      | Acc      | Acc  | Acc  | Acc  | Acc | Acc  | Acc | 8        | 1 | 1 | 1 | 1 | 1 | 1 | 1 |                |        | S          |            |
| <i>Melinis minutiflora</i> P.Beauv.                         | Poaceae       | Acc      | Acc  | Acc  | Acc  | Acc | Acc  | Acc | 13       |   |   | 1 | 1 | 1 | 1 | 1 |                |        | P          |            |
| <i>Melinis repens</i> (Willd.) Zizka subsp. <i>repens</i>   | Poaceae       | Acc      | NL   | Acc  | Syn  | Acc | Acc  | NL  | 23       |   |   |   | 1 |   |   |   |                |        | I          |            |
| <i>Melissa officinalis</i> L.                               | Lamiaceae     | Acc      | Acc  | Acc  | Acc  | Acc | Acc  | Acc | 3        |   | 1 | 1 | 1 | 1 |   |   |                |        | S          | C          |
| <i>Mentha aquatica</i> L.                                   | Lamiaceae     | Acc      | NL   | Acc  | Acc  | Acc | Acc  | Acc | 87       |   |   |   | 1 | 1 |   |   |                |        | P          |            |
| <i>Mentha arvensis</i> L.                                   | Lamiaceae     | Acc      | Acc  | Acc  | Acc  | Acc | Acc  | Acc | 142      |   | 1 |   | 1 |   |   |   |                |        | S          |            |
| <i>Mentha longifolia</i> (L.) L.                            | Lamiaceae     | Acc      | Acc  | Acc  | Acc  | Acc | Acc  | Acc | 1        |   | 1 | 1 | 1 | 1 |   |   |                |        | S          |            |
| <i>Mentha pulegium</i> L.                                   | Lamiaceae     | Acc      | Acc  | Acc  | Acc  | Acc | Acc  | Acc | 35       |   | 1 | 1 | 1 | 1 |   |   |                |        | S          | C          |
| <i>Mentha spicata</i> L.                                    | Lamiaceae     | Acc      | NL   | Acc  | Acc  | Acc | Acc  | Acc | 0        |   | 1 | 1 | 1 | 1 |   |   |                |        | S          |            |
| <i>Mentha suaveolens</i> Ehrh.                              | Lamiaceae     | Acc      | Acc  | Acc  | Acc  | Acc | Acc  | Acc | 0        |   |   | 1 | 1 | 1 | 1 |   |                |        | S          |            |
| <i>Mercurialis annua</i> L.                                 | Euphorbiaceae | Acc      | Acc  | Acc  | Acc  | Acc | Acc  | Acc | 9        | 1 | 1 | 1 | 1 | 1 | 1 | 1 |                |        | P          |            |



| Species Name                                                                             | Family        | Atlantis | Muer | POWO | WFO | COL  | GBIF | TRY | POWO Syn | H | P | G | T | C | F | L | Endemic Status | Native | Non native | Ornam Crop |
|------------------------------------------------------------------------------------------|---------------|----------|------|------|-----|------|------|-----|----------|---|---|---|---|---|---|---|----------------|--------|------------|------------|
| <i>Mercurialis canariensis</i> Obbard & S.A.Harris                                       | Euphorbiaceae | Acc      | Acc  | Acc  | Acc | Acc  | Acc  | Acc | 0        | 1 | 1 |   | 1 |   |   | 1 | A              | S      |            |            |
| <i>Mesembryanthemum cordifolium</i> L.f.                                                 | Aizoaceae     | Acc      | Acc  | Acc  | Acc | Acc  | Acc  | Acc | 3        | 1 | 1 | 1 | 1 | 1 | 1 | 1 |                |        | S          | O          |
| <i>Mesembryanthemum crystallinum</i> L.                                                  | Aizoaceae     | Acc      | Acc  | Acc  | Acc | Acc  | Acc  | Acc | 5        | 1 | 1 | 1 | 1 | 1 | 1 | 1 |                | P      |            | O          |
| <i>Mesembryanthemum nodiflorum</i> L.                                                    | Aizoaceae     | Acc      | Acc  | Acc  | Acc | Acc  | Acc  | Acc | 12       | 1 | 1 | 1 | 1 | 1 | 1 | 1 |                | P      |            | O          |
| <i>Mesembryanthemum theurkauffii</i> (Maire) Maire                                       | Aizoaceae     | Acc      | Acc  | Acc  | Acc | Syn  | Syn  | Acc | 2        |   |   |   |   |   | 1 |   |                | P      |            | O          |
| <i>Micromeria benthamii</i> Webb & Berthel.                                              | Lamiaceae     | Acc      | Acc  | Acc  | Acc | Acc  | Acc  | Acc | 3        |   |   |   |   | 1 |   |   | C              | S      |            |            |
| <i>Micromeria canariensis</i> (P. Pérez) Puppo subsp. <i>canariensis</i>                 | Lamiaceae     | Acc      | Acc  | Acc  | NL  | Acc  | Acc  | NL  | 0        |   |   |   |   | 1 |   |   | C              | S      |            |            |
| <i>Micromeria canariensis</i> (P. Pérez) Puppo subsp. <i>meridialis</i> (P. Perez) Puppo | Lamiaceae     | Acc      | Acc  | Acc  | NL  | Acc  | Acc  | NL  | 3        |   |   |   |   | 1 |   |   | C              | S      |            |            |
| <i>Micromeria densiflora</i> Benth.                                                      | Lamiaceae     | Acc      | Acc  | Acc  | Acc | Acc  | Acc  | Acc | 0        |   |   |   | 1 |   |   |   | T              | S      |            |            |
| <i>Micromeria ericifolia</i> (Roth) Bornm.                                               | Lamiaceae     | Acc      | NL   | Acc  | NL  | Syn  | Syn  | NL  | 4        |   |   |   | 1 |   |   |   | T              | S      |            |            |
| <i>Micromeria glomerata</i> P.Pérez                                                      | Lamiaceae     | Acc      | Acc  | Acc  | Acc | Acc  | Acc  | Acc | 1        |   |   |   | 1 |   |   |   | T              | S      |            |            |
| <i>Micromeria gomerensis</i> (P.Pérez) Puppo                                             | Lamiaceae     | Acc      | Acc  | Acc  | NL  | Acc  | Acc  | NL  | 3        |   |   | 1 |   |   |   |   | G              | S      |            |            |
| <i>Micromeria herpyllomorpha</i> Webb & Berthel. subsp. <i>herpyllomorpha</i>            | Lamiaceae     | Acc      | Acc  | Acc  | NL  | Acc  | Acc  | NL  | 3        |   | 1 |   |   |   |   |   | P              | S      |            |            |
| <i>Micromeria herpyllomorpha</i> Webb & Berthel. subsp. <i>palmensis</i> (Bolle) Puppo   | Lamiaceae     | Acc      | Acc  | Acc  | NL  | Acc  | Acc  | NL  | 4        |   | 1 |   |   |   |   |   | P              | S      |            |            |
| <i>Micromeria hierrensis</i> (P. Perez) Puppo subsp. <i>hierrensis</i>                   | Lamiaceae     | Acc      | Acc  | Acc  | NL  | Acc  | Acc  | NL  | 0        | 1 |   |   |   |   |   |   | H              | S      |            |            |
| <i>Micromeria hierrensis</i> (P. Perez) Puppo subsp. <i>incana</i> Puppo                 | Lamiaceae     | Acc      | Acc  | Acc  | NL  | Acc  | Acc  | NL  | 0        | 1 |   |   |   |   |   |   | H              | S      |            |            |
| <i>Micromeria lachnophylla</i> Webb & Berthel.                                           | Lamiaceae     | Acc      | Acc  | Acc  | Acc | Acc  | Acc  | Acc | 7        |   |   |   | 1 |   |   |   | T              | S      |            |            |
| <i>Micromeria lanata</i> (C.Sm. Ex Link) Benth.                                          | Lamiaceae     | Acc      | Acc  | Acc  | Acc | Acc  | Acc  | Acc | 2        |   |   |   |   | 1 |   |   | C              | S      |            |            |
| <i>Micromeria lasiophylla</i> Webb & Berthel. subsp. <i>lasiophylla</i> (Bolle) P.Pérez  | Lamiaceae     | NL       | NL   | NL   | Acc | AmUn | Syn  | NL  |          |   |   |   | 1 |   |   |   | T              | S      |            |            |
| <i>Micromeria lepida</i> Webb & Berthel. subsp. <i>lepida</i> P.Pérez                    | Lamiaceae     | Acc      | Acc  | Acc  | Syn | Acc  | Acc  | NL  | 2        |   |   | 1 |   |   |   |   | G              | S      |            |            |

| Species Name                                                                                    | Family          | Atlantis | Muer | POWO | WFO  | COL  | GBIF | TRY | POWO Syn | H | P | G | T | C | F | L | Endemic Status | Native | Non native | Ornam Crop |
|-------------------------------------------------------------------------------------------------|-----------------|----------|------|------|------|------|------|-----|----------|---|---|---|---|---|---|---|----------------|--------|------------|------------|
| <i>Micromeria lepida</i> Webb & Berthel. subsp. <i>bolleana</i> P.Pérez                         | Lamiaceae       | Acc      | Acc  | Acc  | Acc  | Acc  | Acc  | NL  | 1        |   |   | 1 |   |   |   |   | G              | S      |            |            |
| <i>Micromeria leucantha</i> Svent. ex P.Perez                                                   | Lamiaceae       | Acc      | Acc  | Acc  | Acc  | Acc  | Acc  | Acc | 1        |   |   |   |   | 1 |   |   | C              | S      |            |            |
| <i>Micromeria mahensis</i> Puppo                                                                | Lamiaceae       | Acc      | NL   | NL   | NL   | AmUn | Acc  | NL  |          |   |   |   |   |   | 1 | 1 | A              | S      |            |            |
| <i>Micromeria pedro-luisii</i> Puppo                                                            | Lamiaceae       | Acc      | Acc  | Acc  | NL   | Acc  | Acc  | NL  | 0        |   |   | 1 |   |   |   |   | G              | S      |            |            |
| <i>Micromeria pineolens</i> Svent.                                                              | Lamiaceae       | Acc      | Acc  | Acc  | Acc  | Acc  | Acc  | Acc | 1        |   |   |   |   | 1 |   |   | C              | S      |            |            |
| <i>Micromeria rivas-martinezii</i> Wildpret                                                     | Lamiaceae       | Acc      | Acc  | Acc  | Acc  | Acc  | Acc  | Acc | 2        |   |   |   | 1 |   |   |   | T              | S      |            |            |
| <i>Micromeria rupestris</i> (Webb & Berthel.) Puppo                                             | Lamiaceae       | NL       | Acc  | Acc  | Syn  | Syn  | Syn  | NL  | 0        |   |   |   |   |   | 1 | 1 | A              | S      |            |            |
| <i>Micromeria teneriffae</i> P.Pérez var. <i>teneriffae</i>                                     | Lamiaceae       | NL       | NL   | NL   | Syn  | AmUn | Syn  | NL  |          |   |   |   | 1 |   |   |   | T              | S      |            |            |
| <i>Micromeria tenuis</i> (Link) Webb & Berthel. subsp. <i>tenuis</i> P. Pérez                   | Lamiaceae       | Acc      | Acc  | Acc  | Syn  | Acc  | Acc  | NL  | 2        |   |   |   |   | 1 |   |   | C              | S      |            |            |
| <i>Micromeria tenuis</i> (Link) Webb & Berthel. subsp. <i>linkii</i> (Webb & Berthel.) P. Pérez | Lamiaceae       | Acc      | Acc  | Acc  | Acc  | Acc  | Acc  | NL  | 6        |   |   |   |   | 1 |   |   | C              | S      |            |            |
| <i>Micromeria tenuis</i> (Link) Webb & Berthel. var. <i>soriae</i> P.Pérez                      | Lamiaceae       | NL       | NL   | Acc  | Acc  | Acc  | Acc  | NL  | 1        |   |   |   |   | 1 |   |   | C              | S      |            |            |
| <i>Micromeria tragothymus</i> Webb & Berthel.                                                   | Lamiaceae       | Acc      | NL   | Acc  | Acc  | Acc  | Acc  | NL  | 3        |   |   |   | 1 |   |   |   | T              | S      |            |            |
| <i>Mirabilis jalapa</i> L.                                                                      | Nyctaginaceae   | Acc      | Acc  | Acc  | Acc  | Acc  | Acc  | Acc | 33       | 1 | 1 | 1 | 1 | 1 | 1 | 1 |                |        | I          | O          |
| <i>Misopates calycinum</i> (Lange) Rothm.                                                       | Plantaginaceae  | Acc      | Acc  | Acc  | Acc  | Acc  | Acc  | Acc | 5        |   |   |   |   |   | 1 |   |                | P      |            |            |
| <i>Misopates orontium</i> (L.) Raf.                                                             | Plantaginaceae  | Acc      | Acc  | Acc  | Acc  | Acc  | Acc  | Acc | 13       | 1 | 1 | 1 | 1 | 1 | 1 | 1 |                | P      |            |            |
| <i>Misopates salvagense</i> D.A.Sutton                                                          | Plantaginaceae  | Acc      | Acc  | Acc  | AmUn | Acc  | Acc  | NL  | 0        | 1 |   |   |   |   | 1 | 1 |                | S      |            |            |
| <i>Moehringia pentandra</i> J.Gay                                                               | Caryophyllaceae | Acc      | Acc  | Acc  | Acc  | Acc  | Acc  | Acc | 2        | 1 | 1 | 1 | 1 | 1 |   | 1 |                | P      |            |            |
| <i>Momordica charantia</i> L.                                                                   | Cucurbitaceae   | Acc      | NL   | Acc  | Acc  | AmUn | Acc  | Acc | 22       | 1 | 1 |   |   |   |   |   |                |        | S          | C          |
| <i>Monanthes anagensis</i> Praeger                                                              | Crassulaceae    | Acc      | Acc  | Acc  | Acc  | Acc  | Acc  | NL  | 0        |   |   |   | 1 |   |   |   | T              | S      |            |            |
| <i>Monanthes brachycaulos</i> (Webb. & Berth.) R. Lowe                                          | Crassulaceae    | Acc      | Acc  | Acc  | Acc  | Acc  | Acc  | Acc | 4        |   |   |   | 1 | 1 |   |   | A              | S      |            |            |
| <i>Monanthes dasyphylla</i> Svent.                                                              | Crassulaceae    | NL       | NL   | Acc  | Syn  | Syn  | Syn  | NL  | 0        |   |   |   | 1 |   |   |   | T              | S      |            |            |
| <i>Monanthes ictérica</i> (Webb & Bolle) Christ                                                 | Crassulaceae    | Acc      | Acc  | Acc  | Acc  | Acc  | Acc  | NL  | 2        |   |   | 1 | 1 |   |   |   | A              | S      |            |            |

| Species Name                                                                      | Family           | Atlantis | Muer | POWO | WFO  | COL | GBIF | TRY | POWO Syn | H | P | G | T | C | F | L | Endemic Status | Native | Non native | Ornam Crop |
|-----------------------------------------------------------------------------------|------------------|----------|------|------|------|-----|------|-----|----------|---|---|---|---|---|---|---|----------------|--------|------------|------------|
| <i>Monanthes laxiflora</i> (DC.) Bolle ex Bornmuller                              | Crassulaceae     | Acc      | Acc  | Acc  | Acc  | Acc | Acc  | Acc | 8        |   | 1 | 1 | 1 | 1 | 1 | 1 | A              | S      |            |            |
| <i>Monanthes minima</i> (Bolle) Christ subsp. <i>minima</i>                       | Crassulaceae     | Acc      | Acc  | NL   | NL   | Acc | Acc  | NL  |          |   |   |   | 1 |   |   |   | T              | S      |            |            |
| <i>Monanthes minima</i> (Bolle) Christ subsp. <i>adenoscepes</i> (Svent.) Bañares | Crassulaceae     | Acc      | Acc  | Acc  | NL   | Acc | Acc  | NL  | 1        |   |   |   | 1 |   |   |   | T              | S      |            |            |
| <i>Monanthes muralis</i> (Webb ex Bolle) Hook.f.                                  | Crassulaceae     | Acc      | Acc  | Acc  | AmUn | Acc | Acc  | Acc | 1        | 1 | 1 |   |   |   |   |   | A              | S      |            |            |
| <i>Monanthes pallens</i> (Webb in Christ) Christ                                  | Crassulaceae     | Acc      | Acc  | Acc  | Acc  | Acc | Acc  | Acc | 1        |   |   | 1 | 1 |   |   |   | A              | S      |            |            |
| <i>Monanthes polyphylla</i> (Aiton) Haw. subsp. <i>polyphylla</i>                 | Crassulaceae     | Acc      | Acc  | NL   | Syn  | Acc | Acc  | NL  |          |   | 1 |   | 1 |   |   |   | A              | S      |            |            |
| <i>Monanthes polyphylla</i> (Aiton) Haw. subsp. <i>amydros</i>                    | Crassulaceae     | Acc      | Acc  | Acc  | Syn  | Acc | Acc  | NL  | 1        |   |   | 1 |   |   |   |   | G              | S      |            |            |
| <i>Monanthes purpurascens</i> (Bolle & Webb) Christ                               | Crassulaceae     | NL       | NL   | Acc  | AmUn | Acc | Syn  | NL  | 1        |   |   |   |   | 1 |   |   | C              | S      |            |            |
| <i>Monanthes subcrassicaulis</i> (Kuntze) Praeger                                 | Crassulaceae     | Syn      | NL   | Acc  | Acc  | Syn | Syn  | Syn | 0        |   | 1 |   | 1 |   |   |   | A              | S      |            |            |
| <i>Monanthes subrosulata</i> Bañares & A. Acev.-Rodr.                             | Crassulaceae     | Acc      | Acc  | Acc  | NL   | Acc | Acc  | NL  | 0        |   | 1 |   |   |   |   |   | P              | S      |            |            |
| <i>Monanthes wildpretii</i> Banares & S.Scholz                                    | Crassulaceae     | Acc      | Acc  | Acc  | Acc  | Acc | Acc  | NL  | 0        |   |   |   | 1 |   |   |   | T              | S      |            |            |
| <i>Montanoa bipinnatifida</i> (Kunth) K.Koch                                      | Asteraceae       | Acc      | Acc  | Acc  | Acc  | Acc | Acc  | Acc | 7        |   |   |   | 1 |   |   |   |                |        | S          | O          |
| <i>Morella rivas-martinezii</i> A.Santos & J.Herb.                                | Myricaceae       | Acc      | Acc  | AmUn | Acc  | Acc | Acc  | Acc | 1        | 1 | 1 | 1 |   |   |   |   | A              | S      |            |            |
| <i>Moricandia arvensis</i> (L.) DC.                                               | Brassicaceae     | Acc      | Acc  | Acc  | Acc  | Acc | Acc  | Acc | 11       |   |   |   |   | 1 | 1 |   |                |        | S          |            |
| <i>Morus alba</i> L.                                                              | Moraceae         | Acc      | Acc  | Acc  | Acc  | Acc | Acc  | Acc | 40       | 1 | 1 |   |   | 1 |   |   |                |        | S          | C          |
| <i>Morus nigra</i> L.                                                             | Moraceae         | Acc      | Acc  | Acc  | Acc  | Acc | Acc  | Acc | 5        | 1 | 1 | 1 | 1 | 1 | 1 | 1 |                |        | S          | C          |
| <i>Musa acuminata</i> Colla                                                       | Musaceae         | Acc      | Acc  | Acc  | Acc  | Acc | Acc  | Acc | 0        | 1 | 1 | 1 | 1 | 1 | 1 | 1 |                |        | S          | C          |
| <i>Myoporum laetum</i> G. Forst.                                                  | Scrophulariaceae | Acc      | Acc  | Acc  | Acc  | Acc | Acc  | Acc | 2        | 1 |   |   | 1 | 1 |   | 1 |                |        | I          | O          |
| <i>Myoporum tenuifolium</i> G. Forst.                                             | Scrophulariaceae | Acc      | Acc  | Acc  | Acc  | Acc | Acc  | Acc | 2        |   |   |   |   | 1 |   |   |                |        | S          | O          |
| <i>Myosotis discolor</i> Pers. subsp. <i>canariensis</i> (Pit.) Grau              | Boraginaceae     | Acc      | Acc  | NL   | NL   | Acc | Acc  | Acc |          | 1 | 1 | 1 | 1 | 1 |   |   | A              | S      |            |            |
| <i>Myosotis latifolia</i> Poir.                                                   | Boraginaceae     | Acc      | Acc  | Acc  | Acc  | Acc | Acc  | Acc | 1        | 1 | 1 | 1 | 1 | 1 |   |   |                | S      |            |            |
| <i>Myosotis ramosissima</i> Rochel                                                | Boraginaceae     | Acc      | Acc  | Acc  | Acc  | Acc | Acc  | Acc | 10       | 1 | 1 |   | 1 | 1 |   |   | P              |        |            |            |
| <i>Myrica faya</i> Aiton                                                          | Myricaceae       | Syn      | Syn  | Acc  | Acc  | Syn | Syn  | Acc | 4        | 1 | 1 | 1 | 1 | 1 | 1 | 1 |                | S      |            |            |

| Species Name                                                      | Family           | Atlantis | Muer | POWO | WFO  | COL  | GBIF | TRY | POWO Syn | H | P | G | T | C | F | L | Endemic Status | Native | Non native | Ornam Crop |
|-------------------------------------------------------------------|------------------|----------|------|------|------|------|------|-----|----------|---|---|---|---|---|---|---|----------------|--------|------------|------------|
| <i>Myriophyllum spicatum</i> L.                                   | Haloragaceae     | Acc      | Acc  | Acc  | Acc  | Acc  | Acc  | Acc | 1        | 1 | 1 |   | 1 | 1 |   |   |                |        | S          |            |
| <i>Myriopus candidulus</i> (Miers) Feuillet                       | Boraginaceae     | Syn      | Syn  | Acc  | Syn  | Acc  | Acc  | Syn | 2        | 1 | 1 | 1 | 1 | 1 | 1 | 1 | A              | S      |            |            |
| <i>Myrtus communis</i> L.                                         | Myrtaceae        | Acc      | Acc  | Acc  | Acc  | Acc  | Acc  | Acc | 0        |   |   | 1 | 1 | 1 |   |   |                |        | S          | O          |
| <i>Najas marina</i> L.                                            | Hydrocharitaceae | Acc      | Acc  | Acc  | Acc  | Acc  | Acc  | Acc | 0        |   |   |   |   | 1 | 1 |   |                |        | P          |            |
| <i>Nanorrhinum sagittatum</i> (Poir.) Yousefi & Zarre;            | Plantaginaceae   | Syn      | Syn  | Acc  | Syn  | Acc  | Acc  | Syn | 3        |   |   |   | 1 | 1 | 1 | 1 |                | S      |            |            |
| <i>Nanorrhinum scoparium</i> (Brouss. ex Spreng.) Yousefi & Zarre | Plantaginaceae   | Syn      | Syn  | Acc  | Syn  | Acc  | Acc  | Syn | 6        |   | 1 | 1 | 1 | 1 |   |   | A              | S      |            |            |
| <i>Nanorrhinum urbanii</i> (Pit.) Yousefi & Zarre                 | Plantaginaceae   | NL       | Syn  | Acc  | Syn  | Acc  | Acc  | NL  | 3        |   |   |   | 1 | 1 |   | 1 | A              | S      |            |            |
| <i>Narcissus tazetta</i> L.                                       | Amaryllidaceae   | Acc      | Acc  | Acc  | Acc  | Acc  | Acc  | Acc | 5        |   |   |   | 1 | 1 |   |   |                | P      |            | O          |
| <i>Nassella neesiana</i> (Trin. & Rupr.) Barkworth                | Poaceae          | Acc      | Acc  | Acc  | Acc  | Acc  | Acc  | Acc | 27       | 1 | 1 | 1 | 1 | 1 | 1 | 1 |                |        | I          |            |
| <i>Nasturtium officinale</i> R.Br.                                | Brassicaceae     | Syn      | Syn  | Acc  | Acc  | Acc  | Acc  | Acc | 31       |   | 1 | 1 | 1 | 1 | 1 |   |                |        | S          | C          |
| <i>Neatostema apulum</i> (L.) I.M.Johnst.                         | Boraginaceae     | Acc      | Acc  | Acc  | AmUn | Acc  | Acc  | Acc | 7        |   |   | 1 | 1 | 1 | 1 | 1 |                | P      |            |            |
| <i>Nemesia melissifolia</i> Benth.                                | Scrophulariaceae | Acc      | Acc  | Acc  | Acc  | Acc  | Acc  | Acc | 0        |   |   |   | 1 |   |   |   |                |        | S          |            |
| <i>Neotinea maculata</i> (Desf.) Stearn                           | Orchidaceae      | Acc      | Acc  | Acc  | Acc  | Acc  | Acc  | Acc | 31       | 1 | 1 | 1 | 1 | 1 |   |   |                | P      |            |            |
| <i>Nepeta teydea</i> Webb & Berthel.                              | Lamiaceae        | Acc      | Acc  | Acc  | Acc  | Acc  | Acc  | Acc | 1        |   | 1 |   | 1 |   |   |   | A              | S      |            |            |
| <i>Nephrolepis cordifolia</i> (L.) C.Presl.                       | Nephrolepidaceae | Acc      | NL   | Acc  | Acc  | AmUn | Acc  | Acc | 25       |   | 1 |   | 1 |   |   |   |                |        | S          | O          |
| <i>Nephrolepis exaltata</i> (L.) Schott                           | Nephrolepidaceae | Acc      | Acc  | Acc  | Acc  | AmUn | Acc  | Acc | 3        |   | 1 |   | 1 | 1 |   |   |                |        | S          | O          |
| <i>Nerium oleander</i> L.                                         | Apocynaceae      | NL       | NL   | Acc  | Acc  | Acc  | Acc  | Acc | 22       |   | 1 |   | 1 | 1 |   |   |                |        | P          | O          |
| <i>Neurada procumbens</i> L.                                      | Neuradaceae      | Acc      | Acc  | Acc  | Acc  | Acc  | Acc  | Acc | 1        |   |   |   |   | 1 |   |   |                |        | I          |            |
| <i>Nicandra physalodes</i> (L.) Gaertn.                           | Solanaceae       | Acc      | Acc  | Acc  | Acc  | Acc  | Acc  | Acc | 18       |   | 1 | 1 | 1 | 1 |   | 1 |                |        | S          | O          |
| <i>Nicotiana alata</i> Link & Otto                                | Solanaceae       | Acc      | Acc  | Acc  | Acc  | Acc  | Acc  | Acc | 7        |   |   |   | 1 |   |   |   |                |        | S          | O          |
| <i>Nicotiana glauca</i> Graham                                    | Solanaceae       | Acc      | Acc  | Acc  | Acc  | Acc  | Acc  | Acc | 8        | 1 | 1 | 1 | 1 | 1 | 1 | 1 |                |        | I          | O          |
| <i>Nicotiana glutinosa</i> L.                                     | Solanaceae       | Acc      | Acc  | Acc  | Acc  | Acc  | Acc  | Acc | 4        |   |   |   | 1 |   |   |   |                |        | S          | O          |
| <i>Nicotiana paniculata</i> L.                                    | Solanaceae       | Acc      | Acc  | Acc  | Acc  | Acc  | Acc  | Acc | 4        |   |   |   | 1 |   |   |   |                |        | I          | O          |
| <i>Nicotiana rustica</i> L.                                       | Solanaceae       | Acc      | Acc  | Acc  | Acc  | Acc  | Acc  | Acc | 22       |   |   |   | 1 |   |   |   |                |        | S          | C          |

| Species Name                                                                                   | Family         | Atlantis | Muer | POWO | WFO  | COL  | GBIF | TRY | POWO Syn | H | P | G | T | C | F | L | Endemic Status | Native | Non native | Ornam Crop |
|------------------------------------------------------------------------------------------------|----------------|----------|------|------|------|------|------|-----|----------|---|---|---|---|---|---|---|----------------|--------|------------|------------|
| <i>Nicotiana tabacum</i> L.                                                                    | Solanaceae     | Acc      | Acc  | Acc  | Acc  | Acc  | Acc  | Acc | 53       | 1 | 1 | 1 | 1 | 1 | 1 | 1 |                |        | S          | C          |
| <i>Nigella damascena</i> L.                                                                    | Ranunculaceae  | Acc      | Acc  | Acc  | Acc  | Acc  | Acc  | Acc | 14       |   | 1 | 1 | 1 |   |   |   |                |        | P          | C          |
| <i>Nothoscordum gracile</i> (Aiton) Stearn                                                     | Amaryllidaceae | Acc      | Acc  | Acc  | Acc  | Acc  | Acc  | Acc | 2        | 1 | 1 | 1 | 1 | 1 |   | 1 |                |        | P          | O          |
| <i>Notobasis syriaca</i> (L.) Cass.                                                            | Asteraceae     | Acc      | Acc  | Acc  | Acc  | Acc  | Acc  | Acc | 7        |   |   |   |   | 1 |   | 1 |                |        | S          |            |
| <i>Notoceras bicornis</i> (Aiton) Amo                                                          | Brassicaceae   | Acc      | Acc  | Acc  | Acc  | Acc  | Acc  | Acc | 2        | 1 | 1 | 1 | 1 | 1 | 1 | 1 |                | P      |            |            |
| <i>Ocimum basilicum</i> L.                                                                     | Lamiaceae      | Acc      | NL   | Acc  | Acc  | Acc  | Acc  | Acc | 25       |   | 1 |   | 1 | 1 | 1 | 1 |                |        | S          | C          |
| <i>Ocotea foetens</i> (Aiton) Baill.                                                           | Lauraceae      | Acc      | Acc  | Acc  | Acc  | Acc  | Acc  | Acc | 7        | 1 | 1 | 1 | 1 | 1 |   |   |                | S      |            |            |
| <i>Odontites hollianus</i> (Lowe) Benth.                                                       | Orobanchaceae  | NL       | NL   | Acc  | Acc  | Acc  | Acc  | Acc | 3        |   | 1 |   |   |   |   |   |                | P      |            |            |
| <i>Oenothera biennis</i> L.                                                                    | Onagraceae     | Acc      | Acc  | Acc  | Acc  | Acc  | Acc  | Acc | 119      |   |   |   | 1 |   |   |   |                |        | S          |            |
| <i>Oenothera glazioviana</i> Micheli                                                           | Onagraceae     | Acc      | Acc  | Acc  | Acc  | Acc  | Acc  | Acc | 49       |   | 1 |   | 1 |   |   |   |                |        | S          |            |
| <i>Oenothera indecora</i> Cambess.                                                             | Onagraceae     | Acc      | Acc  | Acc  | Acc  | Acc  | Acc  | Acc | 5        |   | 1 |   |   |   |   |   |                | P      |            |            |
| <i>Oenothera jamesii</i> Torr. & A. Gray                                                       | Onagraceae     | Acc      | Acc  | Acc  | Acc  | Acc  | Acc  | Acc | 3        |   | 1 |   | 1 |   |   |   |                |        | S          |            |
| <i>Oenothera parodiana</i> Munz                                                                | Onagraceae     | Acc      | Acc  | Acc  | Acc  | Acc  | Acc  | Acc | 5        |   | 1 |   |   |   |   |   |                |        | S          |            |
| <i>Oenothera rosea</i> L'Her. Ex Aiton                                                         | Onagraceae     | Acc      | Acc  | Acc  | Acc  | Acc  | Acc  | Acc | 16       |   | 1 |   | 1 | 1 | 1 | 1 |                |        | S          |            |
| <i>Oenothera stricta</i> Ledeb. ex Link                                                        | Onagraceae     | Acc      | Acc  | Acc  | Acc  | Acc  | Acc  | Acc | 17       |   |   |   | 1 |   |   |   |                |        | S          |            |
| <i>Ogastemma pusillum</i> (Coss. & Durieu ex Bonnet & Barratte) Brummitt                       | Boraginaceae   | Acc      | Acc  | Acc  | Acc  | Acc  | Acc  | Acc | 2        |   |   |   |   |   | 1 |   |                | P      |            |            |
| <i>Olea europaea</i> L. subsp. <i>europaea</i>                                                 | Oleaceae       | Acc      | NL   | Acc  | Syn  | Acc  | Acc  | NL  | 34       | 1 | 1 | 1 | 1 | 1 |   | 1 |                | P      |            | C          |
| <i>Olea europaea</i> L. subsp. <i>guanchica</i> P. Vargas & al.                                | Oleaceae       | Syn      | Acc  | Acc  | Acc  | Acc  | Acc  | Syn | 1        | 1 | 1 | 1 | 1 | 1 | 1 | 1 | A              | S      |            | C          |
| <i>Oligomeris linifolia</i> (Vahl ex Hornem.) J.F. Macbr.                                      | Resedaceae     | Acc      | Acc  | Acc  | Acc  | Acc  | Acc  | Acc | 14       |   |   |   | 1 | 1 | 1 | 1 |                | S      |            |            |
| <i>Oloptum miliaceum</i> (L.) Röser & Hamasha                                                  | Poaceae        | Syn      | Syn  | Acc  | Syn  | Acc  | Syn  | Syn | 29       |   |   | 1 | 1 | 1 |   |   |                | P      |            |            |
| <i>Ononis angustissima</i> Lam. subsp. <i>angustissima</i>                                     | Fabaceae       | Acc      | Acc  | Acc  | NL   | AmUn | Acc  | NL  | 4        |   |   |   | 1 | 1 |   |   | A              | S      |            |            |
| <i>Ononis angustissima</i> Lam. subsp. <i>longifolia</i> (Brouss. ex Willd.) Förther & Podlech | Fabaceae       | Acc      | Acc  | Acc  | AmUn | AmUn | Acc  | NL  | 1        |   |   |   | 1 | 1 | 1 | 1 |                | S      |            |            |
| <i>Ononis catalinae</i> Reyes-Bet. & S. Scholz                                                 | Fabaceae       | Acc      | Acc  | Acc  | AmUn | AmUn | Acc  | NL  | 0        |   |   |   |   |   | 1 | 1 | A              | S      |            |            |

| Species Name                                                 | Family          | Atlantis | Muer | POWO | WFO  | COL  | GBIF | TRY | POWO Syn | H | P | G | T | C | F | L | Endemic Status | Native | Non native | Ornam Crop |
|--------------------------------------------------------------|-----------------|----------|------|------|------|------|------|-----|----------|---|---|---|---|---|---|---|----------------|--------|------------|------------|
| <i>Ononis christii</i> Bolle                                 | Fabaceae        | Acc      | Acc  | Acc  | AmUn | AmUn | Acc  | Acc | 0        |   |   |   |   |   | 1 |   | F              | S      |            |            |
| <i>Ononis dentata</i> Sol. ex Lowe                           | Fabaceae        | Acc      | Acc  | Acc  | Syn  | Syn  | Acc  | Syn | 1        | 1 | 1 | 1 | 1 | 1 |   | 1 |                | P      |            |            |
| <i>Ononis diffusa</i> Ten.                                   | Fabaceae        | Acc      | Acc  | Acc  | Acc  | Acc  | Acc  | Acc | 5        | 1 | 1 | 1 | 1 | 1 | 1 | 1 |                | P      |            |            |
| <i>Ononis hebecarpa</i> Webb & Berthel.                      | Fabaceae        | Acc      | Acc  | Acc  | AmUn | Acc  | Acc  | Acc | 0        |   |   |   |   |   | 1 | 1 | A              | S      |            |            |
| <i>Ononis hesperia</i> (Maire) H. Förther & D. Podlech       | Fabaceae        | Acc      | NL   | Syn  | Acc  | Acc  | Syn  | NL  |          |   |   |   | 1 | 1 | 1 | 1 |                | S      |            |            |
| <i>Ononis laxiflora</i> Desf.                                | Fabaceae        | Acc      | Acc  | Acc  | Acc  | Acc  | Acc  | Acc | 0        |   | 1 |   |   | 1 | 1 | 1 |                | P      |            |            |
| <i>Ononis mitissima</i> L.                                   | Fabaceae        | Acc      | Acc  | Acc  | Acc  | Acc  | Acc  | Acc | 4        | 1 | 1 | 1 | 1 | 1 |   |   |                | P      |            |            |
| <i>Ononis pendula</i> Desf.                                  | Fabaceae        | Acc      | Acc  | Acc  | Acc  | Acc  | Acc  | NL  | 0        |   |   |   |   | 1 | 1 | 1 |                | S      |            |            |
| <i>Ononis reclinata</i> L. subsp. <i>reclinata</i>           | Fabaceae        | Acc      | NL   | Acc  | Acc  | Acc  | Acc  | Syn | 4        | 1 | 1 | 1 | 1 | 1 |   |   |                | P      |            |            |
| <i>Ononis reclinata</i> L. subsp. <i>mollis</i> (Savi) Bég.  | Fabaceae        | Acc      | NL   | NL   | NL   | AmUn | Syn  | Syn |          | 1 | 1 | 1 | 1 | 1 | 1 | 1 |                | P      |            |            |
| <i>Ononis serrata</i> Forssk.                                | Fabaceae        | Acc      | Acc  | Acc  | Acc  | Acc  | Acc  | Acc | 2        | 1 | 1 | 1 | 1 | 1 | 1 | 1 |                | P      |            |            |
| <i>Ononis sicala</i> Guss.                                   | Fabaceae        | Acc      | Acc  | Acc  | Syn  | Acc  | Syn  | Syn | 4        |   |   |   |   |   | 1 | 1 |                | P      |            |            |
| <i>Ononis tournefortii</i> Coss.                             | Fabaceae        | Acc      | Acc  | Acc  | Acc  | Acc  | Acc  | Acc | 2        | 1 |   | 1 | 1 | 1 | 1 | 1 |                | P      |            |            |
| <i>Ononis variegata</i> L.                                   | Fabaceae        | Acc      | Acc  | Acc  | Acc  | Acc  | Acc  | Acc | 3        |   |   |   |   | 1 |   |   |                | P      |            |            |
| <i>Ononis viscosa</i> L.                                     | Fabaceae        | Acc      | Acc  | Acc  | Acc  | Acc  | Acc  | Acc | 1        | 1 |   |   |   | 1 | 1 | 1 |                | P      |            |            |
| <i>Onopordum carduelium</i> Bolle                            | Asteraceae      | Acc      | Acc  | Acc  | Acc  | AmUn | Acc  | NL  | 0        |   |   |   |   | 1 |   |   | C              | S      |            |            |
| <i>Onopordum micropterum</i> Pau                             | Asteraceae      | Acc      | Acc  | Acc  | Acc  | AmUn | Syn  | Acc | 3        |   |   |   |   |   | 1 |   | F              | S      |            |            |
| <i>Ophioglossum azoricum</i> C. Presl                        | Ophioglossaceae | Acc      | Acc  | Acc  | Acc  | Acc  | Acc  | Acc | 0        | 1 | 1 |   | 1 | 1 | 1 | 1 |                | S      |            |            |
| <i>Ophioglossum lusitanicum</i> L. subsp. <i>lusitanicum</i> | Ophioglossaceae | Acc      | NL   | NL   | NL   | AmUn | Syn  | NL  |          | 1 | 1 | 1 | 1 | 1 |   |   |                | S      |            |            |
| <i>Ophioglossum polyphyllum</i> A. Braun ex Schub.           | Ophioglossaceae | Acc      | Acc  | Acc  | Acc  | Acc  | Acc  | Acc | 9        | 1 | 1 |   | 1 | 1 | 1 | 1 |                | S      |            |            |
| <i>Ophrys bombyliflora</i> Link                              | Orchidaceae     | Acc      | Acc  | Acc  | Acc  | Acc  | Acc  | Acc | 1        |   |   |   | 1 | 1 |   |   |                | P      |            |            |
| <i>Oplismenus hirtellus</i> (L.) P.Beauv.                    | Poaceae         | Acc      | Acc  | Acc  | Acc  | Acc  | Acc  | Acc | 69       |   |   |   | 1 |   |   |   |                |        | S          | O          |
| <i>Opuntia basilaris</i> Engelm. & J.M. Bigelow              | Cactaceae       | Acc      | NL   | Acc  | Acc  | Acc  | Acc  | Acc | 21       |   |   |   | 1 |   |   |   |                |        | S          | O          |
| <i>Opuntia dillenii</i> (Ker Gawl.) Haw.                     | Cactaceae       | Acc      | Acc  | Acc  | Acc  | Syn  | Syn  | Acc | 6        | 1 | 1 | 1 | 1 | 1 | 1 | 1 |                |        | I          | O          |

| Species Name                                                                                            | Family        | Atlantis | Muer | POWO | WFO  | COL  | GBIF | TRY | POWO Syn | H | P | G | T | C | F | L | Endemic Status | Native | Non native | Ornam Crop |
|---------------------------------------------------------------------------------------------------------|---------------|----------|------|------|------|------|------|-----|----------|---|---|---|---|---|---|---|----------------|--------|------------|------------|
| <i>Opuntia elatior</i> Mill.                                                                            | Cactaceae     | NL       | NL   | Acc  | Acc  | Acc  | Acc  | Acc | 24       |   |   |   | 1 |   |   |   |                |        | S          | O          |
| <i>Opuntia engelmannii</i> Salm-Dyck ex Engelm. var. <i>lindheimeri</i> (Engelm.) B.D.Parfitt & Pinkava | Cactaceae     | Syn      | NL   | Acc  | Acc  | Acc  | Acc  | Acc | 24       |   |   |   |   | 1 |   |   |                |        | I          | O          |
| <i>Opuntia ficus-indica</i> (L.) Mill.                                                                  | Cactaceae     | NL       | Syn  | Acc  | Acc  | Acc  | Acc  | Acc | 30       | 1 | 1 | 1 | 1 | 1 | 1 | 1 |                |        | S          | O          |
| <i>Opuntia leucotricha</i> DC.                                                                          | Cactaceae     | Acc      | Acc  | Acc  | Acc  | Acc  | Acc  | Acc | 13       |   | 1 |   |   | 1 |   |   |                |        | S          | O          |
| <i>Opuntia macrocentra</i> Engelm.                                                                      | Cactaceae     | Acc      | NL   | Acc  | Acc  | Acc  | Acc  | Acc | 3        |   |   |   | 1 |   |   |   |                |        | S          | O          |
| <i>Opuntia maxima</i> Mill.                                                                             | Cactaceae     | Acc      | Acc  | Acc  | Acc  | AmUn | Acc  | Acc | 16       | 1 | 1 | 1 | 1 | 1 | 1 | 1 |                |        | S          | O          |
| <i>Opuntia microdasys</i> (Lehm.) Pfeiff.                                                               | Cactaceae     | Acc      | NL   | Acc  | Acc  | Acc  | Acc  | Acc | 8        |   |   |   | 1 | 1 | 1 |   |                |        | S          | O          |
| <i>Opuntia monacantha</i> (Willd.) Haw.                                                                 | Cactaceae     | Acc      | NL   | Acc  | Acc  | Acc  | Acc  | Acc | 12       |   | 1 | 1 | 1 | 1 | 1 | 1 |                |        | S          | O          |
| <i>Opuntia pilifera</i> F.A.C. Weber                                                                    | Cactaceae     | Acc      | NL   | Acc  | Acc  | Acc  | Acc  | Acc | 1        |   |   |   | 1 | 1 |   |   |                |        | S          | O          |
| <i>Opuntia robusta</i> J.C. Wendl.                                                                      | Cactaceae     | Acc      | Acc  | Acc  | Acc  | Acc  | Acc  | Acc | 13       |   | 1 |   | 1 | 1 |   |   |                |        | S          | O          |
| <i>Opuntia tomentosa</i> Salm-Dyck                                                                      | Cactaceae     | Acc      | Acc  | Acc  | Acc  | Acc  | Acc  | Acc | 18       | 1 | 1 | 1 | 1 | 1 | 1 | 1 |                |        | I          | O          |
| <i>Opuntia tuna</i> (L.) Mill.                                                                          | Cactaceae     | Acc      | Acc  | Acc  | Acc  | Acc  | Acc  | Acc | 3        |   | 1 |   |   | 1 |   |   |                |        | S          | O          |
| <i>Orchis canariensis</i> Lindl.                                                                        | Orchidaceae   | Acc      | Syn  | Acc  | Syn  | Syn  | Syn  | NL  | 3        | 1 | 1 | 1 | 1 | 1 |   |   | A              | S      |            |            |
| <i>Orchis mascula</i> (L.) L. subsp. <i>lapalmensis</i> Leibbach & Ruedi Peter                          | Orchidaceae   | Acc      | Acc  | Syn  | Syn  | Syn  | Syn  | NL  |          |   | 1 |   |   |   |   |   | P              | S      |            |            |
| <i>Oreocereus pseudofossulatus</i> D.R.Hunt                                                             | Cacactaceae   | Acc      | NL   | Acc  | Syn  | Acc  | Acc  | Syn | 1        |   |   |   | 1 |   |   |   |                |        | S          | O          |
| <i>Origanum vulgare</i> L. subsp. <i>virens</i> (Hoffmanns. & Link) letsw.                              | Lamiaceae     | Acc      | Syn  | Acc  | Acc  | Acc  | Acc  | Acc | 5        | 1 | 1 | 1 | 1 |   |   |   |                | P      |            | C          |
| <i>Ornithogalum arabicum</i> L.                                                                         | Asparagaceae  | Syn      | Syn  | Acc  | Acc  | Acc  | Acc  | Acc | 16       |   |   |   | 1 |   |   |   |                |        | P          |            |
| <i>Ornithogalum narbonense</i> L.                                                                       | Asparagaceae  | Syn      | Syn  | Acc  | Acc  | Acc  | Acc  | Acc | 14       |   |   | 1 | 1 | 1 | 1 | 1 |                |        | P          |            |
| <i>Ornithogalum pyrenaicum</i> L.                                                                       | Asparagaceae  | Syn      | Syn  | Acc  | Acc  | Acc  | Acc  | Acc | 14       |   |   |   |   | 1 |   |   |                |        | P          |            |
| <i>Ornithopus compressus</i> L.                                                                         | Fabaceae      | Acc      | Acc  | Acc  | AmUn | Acc  | Acc  | Acc | 5        | 1 | 1 | 1 | 1 | 1 | 1 |   |                | P      |            |            |
| <i>Ornithopus perpusillus</i> L.                                                                        | Fabaceae      | Acc      | Acc  | Acc  | Acc  | Acc  | Acc  | Acc | 12       |   |   |   | 1 |   | 1 | 1 |                |        | S          |            |
| <i>Ornithopus pinnatus</i> (Mill.) Druce                                                                | Fabaceae      | Acc      | Acc  | Acc  | Acc  | Acc  | Acc  | Acc | 14       | 1 | 1 |   | 1 |   |   |   |                |        | P          |            |
| <i>Orobanche amethystea</i> Thuill.                                                                     | Orobanchaceae | Acc      | Syn  | Acc  | Acc  | Acc  | Acc  | Acc | 10       |   |   |   | 1 |   |   | 1 |                | P      |            |            |

| Species Name                                                                        | Family        | Atlantis | Muer | POWO | WFO  | COL  | GBIF | TRY | POWO Syn | H | P | G | T | C | F | L | Endemic Status | Native | Non native | Ornam Crop |
|-------------------------------------------------------------------------------------|---------------|----------|------|------|------|------|------|-----|----------|---|---|---|---|---|---|---|----------------|--------|------------|------------|
| <i>Orobanche artemisiae-campestris</i> Vaucher ex Gaudin                            | Orobanchaceae | Syn      | NL   | Acc  | Acc  | Acc  | Acc  | Acc | 10       |   |   |   |   |   | 1 | 1 |                | P      |            |            |
| <i>Orobanche calendulae</i> Pomel                                                   | Orobanchaceae | Acc      | Acc  | Acc  | Acc  | Acc  | Acc  | Acc | 2        |   |   |   |   |   |   | 1 |                | P      |            |            |
| <i>Orobanche cernua</i> Loeffl.                                                     | Orobanchaceae | Acc      | Syn  | Acc  | Acc  | Acc  | Acc  | Acc | 20       | 1 |   | 1 | 1 | 1 | 1 | 1 | A              | P      |            |            |
| <i>Orobanche crenata</i> Forssk.                                                    | Orobanchaceae | Acc      | Acc  | Acc  | Acc  | Acc  | Acc  | Acc | 16       | 1 |   |   | 1 | 1 |   | 1 |                | P      |            |            |
| <i>Orobanche gratiosa</i> (Webb & Berthel.) Linding.                                | Orobanchaceae | Syn      | Acc  | Acc  | AmUn | AmUn | Syn  | NL  | 2        |   |   |   |   | 1 | 1 | 1 | A              | S      |            |            |
| <i>Orobanche hederæ</i> Duby                                                        | Orobanchaceae | Acc      | Acc  | Acc  | Acc  | Acc  | Acc  | Acc | 14       |   | 1 | 1 | 1 |   |   |   |                | P      |            |            |
| <i>Orobanche minor</i> Sm.                                                          | Orobanchaceae | Acc      | Acc  | Acc  | Acc  | Acc  | Acc  | Acc | 33       | 1 | 1 |   |   | 1 | 1 | 1 |                | P      |            |            |
| <i>Orobanche mutellii</i> F.W.Schultz                                               | Orobanchaceae | Syn      | Acc  | Acc  | Acc  | Syn  | Syn  | Acc | 22       | 1 |   | 1 | 1 | 1 | 1 | 1 |                | P      |            |            |
| <i>Orobanche nana</i> Noe ex Rchb.                                                  | Orobanchaceae | Syn      | Acc  | Acc  | Acc  | Syn  | Syn  | Acc | 10       | 1 | 1 |   | 1 | 1 | 1 |   |                | P      |            |            |
| <i>Orobanche purpurea</i> Jacq.                                                     | Orobanchaceae | Syn      | Acc  | Acc  | Acc  | Syn  | Acc  | Acc | 18       | 1 | 1 | 1 | 1 | 1 |   | 1 |                | P      |            |            |
| <i>Orobanche ramosa</i> L.                                                          | Orobanchaceae | Syn      | Acc  | Acc  | Acc  | Syn  | Acc  | Acc | 16       | 1 | 1 | 1 | 1 | 1 | 1 | 1 |                | P      |            |            |
| <i>Orobanche schultzei</i> Mutel                                                    | Orobanchaceae | Syn      | Acc  | Acc  | Acc  | Syn  | Syn  | Acc | 11       |   |   |   |   | 1 |   |   |                | P      |            |            |
| <i>Orobanche trichocalyx</i> (Webb & Berthel.) Beck                                 | Orobanchaceae | NL       | Acc  | NL   | Acc  | Syn  | Syn  | NL  |          |   |   |   | 1 | 1 |   |   | A              | S      |            |            |
| <i>Orobanche variegata</i> Wallr.                                                   | Orobanchaceae | NL       | NL   | Acc  | Acc  | Acc  | Acc  | Acc | 13       | 1 | 1 | 1 | 1 | 1 |   | 1 |                | P      |            |            |
| <i>Oropetium capense</i> Stapf subsp. <i>hesperidum</i> Stapf (Maire) Marrero Rodr. | Poaceae       | Acc      | Acc  | Acc  | Acc  | AmUn | Syn  | NL  | 0        |   |   |   |   | 1 |   |   | C              | S      |            |            |
| <i>Oryza sativa</i> L.                                                              | Poaceae       | Acc      | Acc  | Acc  | Acc  | Acc  | Acc  | Acc | 21       |   |   |   | 1 |   |   |   |                |        | S          | C          |
| <i>Osyris lanceolata</i> Hochst. & Steud.                                           | Santalaceae   | Acc      | Acc  | Acc  | Acc  | Syn  | Acc  | Acc | 21       |   | 1 | 1 | 1 |   |   |   |                | S      |            |            |
| <i>Oxalis adenophylla</i> Gillies ex Hook. & Arn.                                   | Oxalidaceae   | NL       | NL   | Acc  | Acc  | Acc  | Acc  | Acc | 3        |   | 1 |   |   |   |   |   |                |        | S          |            |
| <i>Oxalis bowiei</i> W.T.Aiton ex G.Don                                             | Oxalidaceae   | Acc      | NL   | Acc  | Acc  | Acc  | Acc  | Acc | 4        |   |   |   |   | 1 |   |   |                |        | P          |            |
| <i>Oxalis corniculata</i> L.                                                        | Oxalidaceae   | Acc      | Syn  | Acc  | Acc  | Acc  | Acc  | Acc | 64       | 1 | 1 | 1 | 1 | 1 | 1 | 1 |                | P      |            |            |
| <i>Oxalis debilis</i> Kunth                                                         | Oxalidaceae   | Acc      | Syn  | Acc  | Acc  | Acc  | Acc  | Acc | 20       |   | 1 | 1 | 1 | 1 |   |   |                |        | S          |            |
| <i>Oxalis latifolia</i> Kunth                                                       | Oxalidaceae   | Acc      | Acc  | Acc  | Acc  | Acc  | Acc  | Acc | 25       |   | 1 |   | 1 | 1 | 1 |   |                |        | I          |            |
| <i>Oxalis pes-caprae</i> L.                                                         | Oxalidaceae   | Acc      | Acc  | Acc  | Acc  | Acc  | Acc  | Acc | 20       | 1 | 1 | 1 | 1 | 1 | 1 | 1 |                |        | I          |            |



| Species Name                                                                          | Family         | Atlantis | Muer | POWO | WFO | COL  | GBIF | TRY | POWO Syn | H | P | G | T | C | F | L | Endemic Status | Native | Non native | Ornam Crop |
|---------------------------------------------------------------------------------------|----------------|----------|------|------|-----|------|------|-----|----------|---|---|---|---|---|---|---|----------------|--------|------------|------------|
| <i>Oxalis purpurea</i> L.                                                             | Oxalidaceae    | Acc      | Acc  | Acc  | Acc | Acc  | Acc  | Acc | 24       |   |   | 1 | 1 | 1 | 1 | 1 |                |        | S          |            |
| <i>Oxalis stricta</i> L.                                                              | Oxalidaceae    | Acc      | Acc  | Acc  | Acc | Syn  | Syn  | Acc | 67       |   |   |   |   | 1 |   |   |                |        | S          |            |
| <i>Oxybasis glauca</i> (L.) S.Fuentes, Uotila & Borsch                                | Chenopodiaceae | Acc      | Acc  | Acc  | Syn | Acc  | Acc  | Acc | 18       |   |   |   |   | 1 | 1 |   |                | P      |            |            |
| <i>Oxybasis urbica</i> (L.) S.Fuentes, Uotila & Borsch                                | Chenopodiaceae | Acc      | Acc  | Acc  | Syn | Acc  | Acc  | Acc | 10       |   |   |   | 1 | 1 |   |   |                | P      |            |            |
| <i>Pallenis hierochuntica</i> (Michon) Greuter                                        | Asteraceae     | Acc      | Acc  | Acc  | Acc | Acc  | Acc  | Acc | 5        |   |   |   |   |   | 1 |   |                | S      |            |            |
| <i>Pallenis maritima</i> (L.) Greuter                                                 | Asteraceae     | Acc      | Acc  | Acc  | Acc | Acc  | Acc  | Acc | 6        |   |   |   |   | 1 |   | 1 |                | P      |            |            |
| <i>Pallenis spinosa</i> (L.) Cass. subsp. <i>spinosa</i>                              | Asteraceae     | Acc      | Acc  | Acc  | NL  | Acc  | Acc  | NL  | 7        |   | 1 | 1 | 1 | 1 | 1 | 1 |                | P      |            |            |
| <i>Pallenis spinosa</i> (L.) Cass. subsp. <i>maroccana</i> (Aurich & Podlech) Greuter | Asteraceae     | Acc      | NL   | Acc  | Acc | Acc  | Acc  | NL  | 1        |   | 1 |   | 1 |   |   |   |                | P      |            |            |
| <i>Pancratium canariense</i> Ker Gawl.                                                | Amaryllidaceae | Acc      | Acc  | Acc  | Acc | Acc  | Acc  | Acc | 1        | 1 | 1 | 1 | 1 | 1 | 1 | 1 | A              | S      |            |            |
| <i>Pancratium maritimum</i> L.                                                        | Amaryllidaceae | Acc      | Acc  | Acc  | Acc | Acc  | Acc  | Acc | 13       |   |   |   |   |   | 1 | 1 |                | P      |            | O          |
| <i>Panicum capillare</i> L.                                                           | Poaceae        | Acc      | Acc  | Acc  | Acc | Acc  | Acc  | Acc | 13       |   |   |   | 1 |   |   |   |                |        | S          |            |
| <i>Panicum miliaceum</i> L. subsp. <i>miliaceum</i>                                   | Poaceae        | Acc      | NL   | NL   | Syn | AmUn | Acc  | NL  |          |   | 1 |   |   |   | 1 |   |                |        | S          | C          |
| <i>Panicum repens</i> L.                                                              | Poaceae        | Acc      | Acc  | Acc  | Acc | Acc  | Acc  | Acc | 13       |   |   | 1 | 1 | 1 |   |   |                | P      |            |            |
| <i>Papaver argemone</i> L.                                                            | Papaveraceae   | Acc      | Syn  | Acc  | Acc | Acc  | Acc  | Acc | 13       |   |   |   |   |   | 1 | 1 |                | P      |            |            |
| <i>Papaver dodecandrum</i> (Forssk.) Medik.                                           | Papaveraceae   | NL       | NL   | Acc  | Acc | AmUn | Syn  | Syn | 28       | 1 | 1 | 1 | 1 | 1 | 1 | 1 |                | P      |            |            |
| <i>Papaver dubium</i> L.                                                              | Papaveraceae   | Acc      | Acc  | Acc  | Acc | Acc  | Acc  | Acc | 32       | 1 | 1 | 1 | 1 | 1 | 1 | 1 |                | P      |            |            |
| <i>Papaver pinnatifidum</i> Moris                                                     | Papaveraceae   | Acc      | Acc  | Acc  | Acc | Acc  | Acc  | Acc | 2        | 1 | 1 | 1 | 1 | 1 | 1 | 1 |                | P      |            |            |
| <i>Papaver rhoeas</i> L.                                                              | Papaveraceae   | Acc      | Acc  | Acc  | Acc | Acc  | Acc  | Acc | 59       | 1 | 1 | 1 | 1 | 1 | 1 | 1 |                | P      |            |            |
| <i>Papaver somniferum</i> L. subsp. <i>somniferum</i>                                 | Papaveraceae   | Acc      | NL   | NL   | NL  | AmUn | Acc  | Acc |          | 1 | 1 | 1 | 1 | 1 | 1 | 1 |                | P      |            | O          |
| <i>Papaver somniferum</i> L. subsp. <i>setigerum</i> (DC.) Arcang.                    | Papaveraceae   | Acc      | Syn  | Acc  | Acc | Syn  | Syn  | Acc | 1        |   | 1 |   | 1 | 1 | 1 | 1 |                | P      |            | O          |
| <i>Parapholis incurva</i> (L.) C.E.Hubb.                                              | Poaceae        | Acc      | Acc  | Acc  | Acc | Acc  | Acc  | Acc | 15       |   |   |   |   |   | 1 | 1 |                | P      |            |            |
| <i>Parapholis pycnantha</i> (Hack.) C. E. Hubb.                                       | Poaceae        | Acc      | Acc  | Acc  | Acc | Acc  | Acc  | Acc | 0        |   |   |   |   | 1 | 1 |   |                | P      |            |            |
| <i>Paraserianthes lophantha</i> (Willd.) I.C.Nielsen                                  | Fabaceae       | Acc      | Acc  | Acc  | Acc | Acc  | Acc  | Acc | 6        |   | 1 | 1 | 1 | 1 | 1 |   |                |        | I          |            |

| Species Name                                                                      | Family          | Atlantis | Muer | POWO | WFO  | COL  | GBIF | TRY | POWO Syn | H | P | G | T | C | F | L | Endemic Status | Native | Non native | Ornam Crop |
|-----------------------------------------------------------------------------------|-----------------|----------|------|------|------|------|------|-----|----------|---|---|---|---|---|---|---|----------------|--------|------------|------------|
| <i>Parentucellia latifolia</i> (L.) Caruel                                        | Orobanchaceae   | Acc      | Syn  | Acc  | AmUn | Acc  | Acc  | Acc | 18       |   |   |   | 1 | 1 |   |   |                |        | P          |            |
| <i>Parentucellia viscosa</i> (L.) Caruel                                          | Orobanchaceae   | Acc      | Syn  | Acc  | Acc  | Syn  | Syn  | Acc | 11       | 1 | 1 | 1 | 1 | 1 |   |   |                | P      |            |            |
| <i>Parietaria debilis</i> G.Forst.                                                | Urticaceae      | Acc      | Acc  | Acc  | Acc  | Acc  | Acc  | Acc | 32       | 1 | 1 | 1 | 1 | 1 | 1 | 1 |                | P      |            |            |
| <i>Parietaria filamentosa</i> Webb & Bertel.                                      | Urticaceae      | Acc      | Acc  | Acc  | AmUn | Acc  | Acc  | NL  | 1        |   | 1 | 1 | 1 |   |   |   | A              | S      |            |            |
| <i>Parietaria judaica</i> L.                                                      | Urticaceae      | Acc      | Acc  | Acc  | Acc  | Acc  | Acc  | Acc | 12       | 1 | 1 | 1 | 1 | 1 | 1 | 1 |                | P      |            |            |
| <i>Parietaria mauritanica</i> Durieu                                              | Urticaceae      | Acc      | Acc  | Acc  | Acc  | Acc  | Acc  | Acc | 5        | 1 |   |   | 1 |   |   | 1 |                | P      |            |            |
| <i>Parkinsonia aculeata</i> L.                                                    | Fabaceae        | Acc      | Acc  | Acc  | Acc  | Acc  | Acc  | Acc | 3        |   |   |   | 1 | 1 | 1 |   |                |        | S          | O          |
| <i>Parolinia aridanae</i> A. Santos                                               | Brassicaceae    | NL       | Acc  | NL   | NL   | AmUn | Acc  | NL  |          |   | 1 |   |   |   |   |   | P              | S      |            |            |
| <i>Parolinia filifolia</i> Kunk.                                                  | Brassicaceae    | Acc      | Acc  | Acc  | Acc  | Acc  | Acc  | NL  | 0        |   |   |   |   | 1 |   |   | C              | S      |            |            |
| <i>Parolinia glabriuscula</i> Montelongo & Bramwell                               | Brassicaceae    | Acc      | Acc  | Acc  | AmUn | AmUn | Acc  | NL  | 0        |   |   |   |   | 1 |   |   | C              | S      |            |            |
| <i>Parolinia intermedia</i> Svent. & Bramwell                                     | Brassicaceae    | Acc      | Acc  | Acc  | Acc  | Acc  | Acc  | Acc | 0        |   |   |   | 1 |   |   |   | T              | S      |            |            |
| <i>Parolinia ornata</i> Webb                                                      | Brassicaceae    | Acc      | Acc  | Acc  | Acc  | Acc  | Acc  | Acc | 0        |   |   |   |   | 1 |   |   | C              | S      |            |            |
| <i>Parolinia platypetala</i> G. Kunkel                                            | Brassicaceae    | Acc      | Acc  | Acc  | Acc  | Acc  | Acc  | NL  | 0        |   |   |   |   | 1 |   |   | C              | S      |            |            |
| <i>Parolinia schizogynoides</i> Svent.                                            | Brassicaceae    | Acc      | Acc  | Acc  | Acc  | Acc  | Acc  | Acc | 0        |   |   | 1 |   |   |   |   | G              | S      |            |            |
| <i>Paronychia argentea</i> Lam.                                                   | Caryophyllaceae | Acc      | Acc  | Acc  | Acc  | Acc  | Acc  | Acc | 14       | 1 |   |   |   | 1 |   |   |                | P      |            |            |
| <i>Paronychia canariensis</i> (L.f.) Link                                         | Caryophyllaceae | Acc      | Acc  | Acc  | Acc  | Acc  | Acc  | Acc | 7        | 1 | 1 | 1 | 1 | 1 |   |   | A              | S      |            |            |
| <i>Paronychia capitata</i> (L.) Lam. subsp. <i>canariensis</i> (Chaudhri) Sunding | Caryophyllaceae | Acc      | Acc  | Acc  | NL   | Syn  | Syn  | NL  | 0        |   |   |   |   | 1 |   |   | C              | S      |            |            |
| <i>Paronychia echinulata</i> Chater                                               | Caryophyllaceae | Acc      | Acc  | Acc  | Acc  | Acc  | Acc  | Acc | 2        |   | 1 |   |   | 1 |   |   |                | P      |            |            |
| <i>Parthenocissus tricuspidata</i> (Siebold & Zucc.) Planch.                      | Vitaceae        | Acc      | Acc  | Acc  | Acc  | Acc  | Acc  | Acc | 18       |   |   |   |   | 1 |   |   |                |        | S          | O          |
| <i>Pascalina glauca</i> Ortega                                                    | Asteraceae      | NL       | NL   | Acc  | Acc  | Acc  | Acc  | NL  | 10       |   | 1 |   |   |   |   |   |                |        | S          |            |
| <i>Paspalum dilatatum</i> Poir.                                                   | Poaceae         | Acc      | Acc  | Acc  | Acc  | Acc  | Acc  | Acc | 14       |   | 1 |   | 1 |   |   |   |                |        | S          |            |
| <i>Paspalum distichum</i> L.                                                      | Poaceae         | Acc      | Acc  | Acc  | Acc  | Acc  | Acc  | Acc | 29       |   | 1 | 1 | 1 | 1 |   |   |                |        | S          |            |
| <i>Paspalum notatum</i> Flügge                                                    | Poaceae         | Acc      | NL   | Acc  | Acc  | Acc  | Acc  | Acc | 6        |   |   |   | 1 |   |   |   |                |        | S          |            |

| Species Name                                                                                       | Family         | Atlantis | Muer | POWO | WFO | COL  | GBIF | TRY | POWO Syn | H | P | G | T | C | F | L | Endemic Status | Native | Non native | Ornam Crop |
|----------------------------------------------------------------------------------------------------|----------------|----------|------|------|-----|------|------|-----|----------|---|---|---|---|---|---|---|----------------|--------|------------|------------|
| <i>Paspalum urvillei</i> Steud.                                                                    | Poaceae        | Acc      | Acc  | Acc  | Acc | Acc  | Acc  | Acc | 6        |   | 1 |   |   |   |   |   |                |        | S          |            |
| <i>Paspalum vaginatum</i> Sw.                                                                      | Poaceae        | Acc      | NL   | Acc  | Acc | Acc  | Acc  | Acc | 27       |   | 1 |   | 1 | 1 |   |   |                |        | I          |            |
| <i>Passiflora caerulea</i> L.                                                                      | Passifloraceae | NL       | NL   | Acc  | Acc | Acc  | Acc  | Acc | 12       |   | 1 |   | 1 |   |   |   |                |        | S          | O          |
| <i>Passiflora edulis</i> Sims                                                                      | Passifloraceae | NL       | Acc  | Acc  | Acc | Acc  | Acc  | Acc | 14       |   | 1 |   |   | 1 |   |   |                |        | S          | O          |
| <i>Passiflora mollissima</i> (Kunth) L. H. Bailey                                                  | Passifloraceae | Acc      | Acc  | Acc  | Acc | Acc  | Acc  | Acc | 5        |   | 1 |   |   |   |   |   |                |        | S          | O          |
| <i>Passiflora morifolia</i> Mast.                                                                  | Passifloraceae | Acc      | NL   | Acc  | Acc | Acc  | Acc  | Acc | 5        |   |   |   | 1 | 1 |   |   |                |        | S          | O          |
| <i>Passiflora suberosa</i> L.                                                                      | Passifloraceae | Acc      | Acc  | Acc  | Acc | Acc  | Acc  | Acc | 32       |   | 1 |   |   | 1 |   |   |                |        | S          | O          |
| <i>Patellifolia procumbens</i> (C.Sm.) A.J.Scott, Ford-Lloyd & J.T.Williams                        | Amaranthaceae  | Acc      | Acc  | Acc  | Acc | Syn  | Syn  | Acc | 16       | 1 | 1 | 1 | 1 | 1 | 1 | 1 |                | S      |            |            |
| <i>Pavonia sepioides</i> Fryxell & Krapov.                                                         | Malvaceae      | NL       | NL   | Acc  | Acc | Acc  | Acc  | Acc | 0        |   |   |   | 1 |   |   |   |                |        | S          | O          |
| <i>Pelargonium capitatum</i> (L.) L'Her.                                                           | Geraniaceae    | Acc      | Acc  | Acc  | Acc | Acc  | Acc  | Acc | 5        |   | 1 |   |   |   |   | 1 |                |        | I          | O          |
| <i>Pelargonium cucullatum</i> (L.) L'Her.                                                          | Geraniaceae    | Acc      | NL   | Acc  | Acc | Acc  | Acc  | Syn | 16       |   | 1 |   |   |   |   |   |                |        | S          | O          |
| <i>Pelargonium graveolens</i> L'Her.                                                               | Geraniaceae    | Acc      | Acc  | Acc  | Acc | Acc  | Acc  | Acc | 8        | 1 |   | 1 | 1 | 1 |   |   |                |        | S          | O          |
| <i>Pelargonium inquinans</i> (L.) L'Her.                                                           | Geraniaceae    | Acc      | Acc  | Acc  | Acc | Acc  | Acc  | Acc | 9        |   | 1 |   | 1 | 1 |   | 1 |                |        | I          | O          |
| <i>Pelargonium peltatum</i> (L.) L'Her.                                                            | Geraniaceae    | Acc      | Acc  | Acc  | Acc | Acc  | Acc  | Acc | 10       |   |   |   | 1 | 1 |   |   |                |        | S          | O          |
| <i>Pelargonium quercifolium</i> (L. f.) L'Her.                                                     | Geraniaceae    | Acc      | Acc  | Acc  | Acc | Acc  | Acc  | Acc | 6        |   |   | 1 | 1 |   |   |   |                |        | S          | O          |
| <i>Pelargonium zonale</i> (L.) L'Her. ex Aiton                                                     | Geraniaceae    | Acc      | Acc  | Acc  | Acc | Acc  | Acc  | Acc | 34       |   |   |   | 1 | 1 |   |   |                |        | I          | O          |
| <i>Pericallis appendiculata</i> (L.f.) B.Nord. var. <i>appendiculata</i>                           | Asteraceae     | NL       | Acc  | NL   | Syn | AmUn | Syn  | NL  |          |   | 1 | 1 | 1 |   |   |   | A              | S      |            |            |
| <i>Pericallis appendiculata</i> (L.f.) B.Nord. var. <i>preauxiana</i> Sch. Bip. in Webb & Berthel. | Asteraceae     | NL       | Acc  | Acc  | NL  | Acc  | Acc  | NL  | 0        |   |   |   |   | 1 |   |   | C              | S      |            |            |
| <i>Pericallis cruenta</i> Webb & Berthel.                                                          | Asteraceae     | Acc      | Acc  | Acc  | Acc | Acc  | Acc  | Acc | 7        | 1 |   | 1 | 1 | 1 |   |   | A              | S      |            |            |
| <i>Pericallis echinata</i> (L.f.) B.Nord.                                                          | Asteraceae     | Acc      | Acc  | Acc  | Acc | Acc  | Acc  | Acc | 4        |   |   |   | 1 |   |   |   | T              | S      |            |            |
| <i>Pericallis hadrosoma</i> (Svent.) B.Nord.                                                       | Asteraceae     | Acc      | Acc  | Acc  | Acc | Acc  | Acc  | NL  | 1        |   |   |   |   | 1 |   |   | C              | S      |            |            |
| <i>Pericallis hansenii</i> (G.Kunkel) Sunding                                                      | Asteraceae     | Acc      | Acc  | Acc  | Acc | Acc  | Acc  | NL  | 1        |   |   | 1 |   |   |   |   | G              | S      |            |            |

| Species Name                                                                                                                                      | Family          | Atlantis | Muer | POWO | WFO | COL  | GBIF | TRY | POWO Syn | H | P | G | T | C | F | L | Endemic Status | Native | Non native | Ornam Crop |
|---------------------------------------------------------------------------------------------------------------------------------------------------|-----------------|----------|------|------|-----|------|------|-----|----------|---|---|---|---|---|---|---|----------------|--------|------------|------------|
| <i>Pericallis hillebrandii</i> (Christ) Barquín & Voggenreiter ex Beierkuhnlein, Walentowitz & Welss; Basionym <i>Senecio hillebrandii</i> Christ | Asteraceae      | NL       | NL   | Syn  | Syn | Syn  | Acc  | NL  |          |   | 1 |   |   |   |   |   | P              | S      |            |            |
| <i>Pericallis lanata</i> (L'Hér) B.Nord.                                                                                                          | Asteraceae      | Acc      | Acc  | Acc  | Acc | Acc  | Acc  | Acc | 3        |   |   |   | 1 |   |   |   | T              | S      |            |            |
| <i>Pericallis multiflora</i> (L'Hér) B.Nord.                                                                                                      | Asteraceae      | Acc      | Acc  | Acc  | Acc | Acc  | Acc  | Acc | 7        |   |   |   | 1 |   |   |   | T              | S      |            |            |
| <i>Pericallis murrayi</i> (Bornm.) B.Nord.                                                                                                        | Asteraceae      | Acc      | Acc  | Acc  | Acc | Acc  | Acc  | Acc | 1        | 1 |   |   |   |   |   |   | H              | S      |            |            |
| <i>Pericallis papyracea</i> (DC.) B.Nord.                                                                                                         | Asteraceae      | Acc      | Acc  | Acc  | Acc | Acc  | Acc  | Acc | 6        |   | 1 |   |   |   |   |   | P              | S      |            |            |
| <i>Pericallis steetzii</i> (Bolle) B.Nord.                                                                                                        | Asteraceae      | Acc      | Acc  | Acc  | Acc | Acc  | Acc  | Acc | 1        |   |   | 1 |   |   |   |   | G              | S      |            |            |
| <i>Pericallis tussilaginis</i> (L'Hér.) D.Don.                                                                                                    | Asteraceae      | Acc      | Acc  | Acc  | Acc | Acc  | Acc  | Acc | 5        |   |   |   | 1 | 1 |   |   | A              | S      |            |            |
| <i>Pericallis webbii</i> (Sch.Bip.) Bolle                                                                                                         | Asteraceae      | Acc      | Acc  | Acc  | Acc | Acc  | Acc  | Acc | 2        |   |   |   |   | 1 |   |   | C              | S      |            |            |
| <i>Periploca laevigata</i> Aiton                                                                                                                  | Apocynaceae     | Acc      | Acc  | Acc  | Acc | Acc  | Acc  | Acc | 5        | 1 | 1 | 1 | 1 | 1 | 1 | 1 |                | S      |            |            |
| <i>Persea americana</i> Mill.                                                                                                                     | Lauraceae       | NL       | NL   | Acc  | Acc | Acc  | Acc  | Acc | 29       |   | 1 | 1 | 1 |   |   |   |                |        | S          | C          |
| <i>Persea barbudana</i> (Cav.) Mabb. & Nieto subsp. <i>barbudana</i>                                                                              | Lauraceae       | Syn      | Syn  | NL   | NL  | Syn  | Syn  | NL  |          | 1 | 1 | 1 | 1 | 1 | 1 |   |                | S      |            |            |
| <i>Persea barbudana</i> (Cav.) Mabb. & Nieto subsp. <i>ceballosi</i> (Svent.) G.Kunkel                                                            | Lauraceae       | Syn      | Syn  | AmUn | Syn | AmUn | Syn  | NL  |          |   |   | 1 |   |   |   |   | G              | S      |            |            |
| <i>Persea indica</i> (L.) Spreng.                                                                                                                 | Lauraceae       | Acc      | Acc  | Acc  | Acc | Syn  | Syn  | Acc | 9        | 1 | 1 | 1 | 1 | 1 |   |   |                | S      |            |            |
| <i>Persicaria capitata</i> (Buch.-Ham. ex D.Don) H.Gross                                                                                          | Polygonaceae    | Acc      | Acc  | Acc  | Acc | Acc  | Acc  | Acc | 5        |   | 1 | 1 | 1 | 1 |   |   |                |        | S          |            |
| <i>Persicaria decipiens</i> (R.Br.) K.L.Wilson                                                                                                    | Polygonaceae    | Syn      | Syn  | Acc  | Acc | Acc  | Acc  | Acc | 27       |   |   | 1 | 1 | 1 |   |   |                | P      |            |            |
| <i>Persicaria maculosa</i> Gray                                                                                                                   | Polygonaceae    | Acc      | Acc  | Acc  | Acc | Acc  | Acc  | Acc | 68       |   | 1 |   | 1 | 1 |   |   |                | P      |            |            |
| <i>Petrea volubilis</i> L.                                                                                                                        | Verbenaceae     | NL       | NL   | Acc  | Acc | Acc  | Acc  | Acc | 34       |   | 1 |   | 1 |   |   |   |                |        | S          | O          |
| <i>Petrorhagia dubia</i> (Raf.) G.López & Romo                                                                                                    | Caryophyllaceae | Acc      | Acc  | Acc  | Acc | Acc  | Acc  | Acc | 11       |   |   |   |   | 1 |   |   |                | P      |            |            |
| <i>Petrorhagia nanteuillii</i> (Burnat) P.W.Ball & Heywood                                                                                        | Caryophyllaceae | Acc      | Acc  | Acc  | Acc | Acc  | Acc  | Acc | 4        | 1 | 1 | 1 | 1 | 1 |   | 1 |                | P      |            |            |
| <i>Petroselinum crispum</i> (Mill.) Fuss.                                                                                                         | Apiaceae        | Acc      | Acc  | Acc  | Acc | Acc  | Acc  | Acc | 61       | 1 | 1 | 1 | 1 | 1 | 1 | 1 |                |        | S          | C          |
| <i>Petunia axillaris</i> (Lam.) Britton, Sterns & Poggenb.                                                                                        | Solanaceae      | Acc      | NL   | Acc  | Acc | Acc  | Acc  | Acc | 8        |   |   |   | 1 |   |   | 1 |                |        | S          | O          |
| <i>Phacelia tanacetifolia</i> Benth.                                                                                                              | Boraginaceae    | NL       | NL   | Acc  | Acc | Acc  | Acc  | Acc | 8        |   | 1 |   |   | 1 | 1 |   |                |        | S          | C          |

| Species Name                                                                      | Family           | Atlantis | Muer | POWO | WFO | COL  | GBIF | TRY | POWO Syn | H | P | G | T | C | F | L | Endemic Status | Native | Non native | Ornam Crop |
|-----------------------------------------------------------------------------------|------------------|----------|------|------|-----|------|------|-----|----------|---|---|---|---|---|---|---|----------------|--------|------------|------------|
| <i>Phagnalon purpurascens</i> Sch.Bip.                                            | Asteraceae       | Acc      | Acc  | Acc  | Acc | Acc  | Acc  | Acc | 0        | 1 | 1 | 1 | 1 | 1 | 1 | 1 |                | P      |            |            |
| <i>Phagnalon rupestre</i> (L.) DC. subsp. <i>rupestre</i>                         | Asteraceae       | NL       | NL   | Acc  | Syn | Acc  | Acc  | NL  | 7        | 1 | 1 | 1 | 1 | 1 | 1 | 1 |                | P      |            |            |
| <i>Phagnalon rupestre</i> (L.) DC. subsp. <i>Illyricum</i> DC (H.Lindb.) Ginz.    | Asteraceae       | Acc      | NL   | Acc  | Acc | Syn  | Acc  | NL  | 2        |   | 1 |   | 1 | 1 |   | 1 |                | P      |            |            |
| <i>Phagnalon saxatile</i> (L.) Cass.                                              | Asteraceae       | Acc      | Acc  | Acc  | Acc | Acc  | Acc  | Acc | 4        | 1 | 1 | 1 | 1 | 1 | 1 | 1 |                | P      |            |            |
| <i>Phagnalon umbelliforme</i> DC.                                                 | Asteraceae       | Acc      | Acc  | Acc  | Acc | Acc  | Acc  | Acc | 0        | 1 | 1 | 1 | 1 | 1 |   |   | A              | S      |            |            |
| <i>Phalaris aquatica</i> L.                                                       | Poaceae          | Acc      | Acc  | Acc  | Acc | Acc  | Acc  | Acc | 10       | 1 | 1 |   | 1 | 1 |   |   |                | P      |            |            |
| <i>Phalaris brachystachys</i> Link                                                | Poaceae          | Acc      | Acc  | Acc  | Acc | Acc  | Acc  | Acc | 3        | 1 |   | 1 | 1 | 1 | 1 | 1 |                | P      |            |            |
| <i>Phalaris canariensis</i> L.                                                    | Poaceae          | Acc      | Acc  | Acc  | Acc | Acc  | Acc  | Acc | 3        | 1 | 1 | 1 | 1 | 1 | 1 | 1 |                | S      |            |            |
| <i>Phalaris coerulescens</i> Desf.                                                | Poaceae          | Acc      | Acc  | Acc  | Acc | Acc  | Acc  | Acc | 6        | 1 | 1 | 1 | 1 | 1 | 1 | 1 |                | P      |            |            |
| <i>Phalaris minor</i> Retz.                                                       | Poaceae          | Acc      | Acc  | Acc  | Acc | Acc  | Acc  | Acc | 7        |   | 1 | 1 | 1 | 1 | 1 | 1 |                | P      |            |            |
| <i>Phalaris paradoxa</i> L.                                                       | Poaceae          | Acc      | Acc  | Acc  | Acc | Acc  | Acc  | Acc | 8        |   | 1 | 1 | 1 | 1 | 1 | 1 |                | P      |            |            |
| <i>Phaseolus acutifolius</i> A. Gray                                              | Fabaceae         | Acc      | NL   | Acc  | Acc | Acc  | Acc  | Acc | 0        |   |   |   |   | 1 |   |   |                |        | S          | C          |
| <i>Phaseolus vulgaris</i> L.                                                      | Fabaceae         | Acc      | Acc  | Acc  | Acc | Acc  | Acc  | Acc | 48       |   |   |   |   | 1 |   |   |                |        | S          | C          |
| <i>Phillyrea angustifolia</i> L. subsp. <i>canariensis</i> Rivas-Mart. & del Arco | Oleaceae         | Acc      | NL   | NL   | NL  | AmUn | Acc  | NL  |          |   |   |   |   | 1 | 1 | 1 | A              | S      |            |            |
| <i>Phillyrea latifolia</i> L.                                                     | Oleaceae         | NL       | NL   | Acc  | Acc | Acc  | Acc  | Acc | 60       |   |   |   |   |   |   | 1 |                |        | S          | O          |
| <i>Phlebodium aureum</i> (L.) J.Sm.                                               | Polypodiaceae    | Acc      | Acc  | Acc  | Acc | Acc  | Acc  | Acc | 17       |   | 1 |   | 1 |   |   |   |                |        | S          | O          |
| <i>Phlomis purpurea</i> L.                                                        | Lamiaceae        | NL       | NL   | Acc  | Acc | Acc  | Acc  | Acc | 0        |   |   |   |   | 1 |   |   |                |        | P          |            |
| <i>Phoenix canariensis</i> Chabaud                                                | Arecaceae        | Acc      | Acc  | Acc  | Acc | Acc  | Acc  | Acc | 5        | 1 | 1 | 1 | 1 | 1 | 1 | 1 | A              | S      |            |            |
| <i>Phoenix dactylifera</i> L.                                                     | Arecaceae        | Acc      | Acc  | Acc  | Acc | Acc  | Acc  | Acc | 8        |   | 1 |   | 1 | 1 | 1 | 1 |                |        | I          | C          |
| <i>Phormium tenax</i> J.R.Forst. & G.Forst.                                       | Xanthorrhoeaceae | Acc      | Acc  | Acc  | Acc | Acc  | Acc  | Acc | 3        |   |   |   | 1 |   |   |   |                |        | S          | O          |
| <i>Phragmites australis</i> (Cav.) Trin. ex Steud.                                | Poaceae          | Acc      | Acc  | Acc  | Acc | Acc  | Acc  | Acc | 1        |   |   | 1 | 1 | 1 | 1 | 1 |                |        | P          |            |
| <i>Phyla nodiflora</i> (L.) Greene                                                | Verbenaceae      | Acc      | Acc  | Acc  | Acc | Acc  | Acc  | Acc | 5        |   |   | 1 | 1 | 1 |   |   |                |        | S          | O          |

| Species Name                                                                                                              | Family         | Atlantis | Muer | POWO | WFO  | COL | GBIF | TRY | POWO Syn | H | P | G | T | C | F | L | Endemic Status | Native | Non native | Ornam Crop |
|---------------------------------------------------------------------------------------------------------------------------|----------------|----------|------|------|------|-----|------|-----|----------|---|---|---|---|---|---|---|----------------|--------|------------|------------|
| <i>Phyla nodiflora</i> (L.) Greene var. <i>minor</i> (Gillies & Hook.) N.O'Leary & Múlgura; <i>Lippia canescens</i> Kunth | Verbenaceae    | Syn      | Acc  | Acc  | Syn  | Acc | Acc  | Syn | 21       |   |   |   | 1 |   |   |   |                |        | S          | O          |
| <i>Phyllanthus tenellus</i> Roxb.                                                                                         | Phyllanthaceae | Acc      | Acc  | Acc  | Acc  | Acc | Acc  | Acc | 1        |   |   |   |   | 1 |   |   |                |        | S          |            |
| <i>Phyllis nobla</i> L.                                                                                                   | Rubiaceae      | Acc      | Acc  | Acc  | Acc  | Acc | Acc  | Acc | 3        | 1 | 1 | 1 | 1 | 1 |   |   |                | S      |            |            |
| <i>Phyllis viscosa</i> Webb ex Christ                                                                                     | Rubiaceae      | Acc      | Acc  | Acc  | Acc  | Acc | Acc  | Acc | 1        | 1 |   | 1 | 1 |   |   |   | A              | S      |            |            |
| <i>Physalis peruviana</i> L.                                                                                              | Solanaceae     | Acc      | Acc  | Acc  | Acc  | Acc | Acc  | Acc | 17       | 1 | 1 | 1 | 1 | 1 |   |   |                |        | S          | C          |
| <i>Phytolacca americana</i> L.                                                                                            | Phytolaccaceae | Acc      | Acc  | Acc  | Acc  | Acc | Acc  | Acc | 3        | 1 | 1 |   | 1 | 1 |   |   |                |        | I          | O          |
| <i>Phytolacca dioica</i> L.                                                                                               | Phytolaccaceae | Acc      | Acc  | Acc  | Acc  | Acc | Acc  | Acc | 6        |   | 1 |   | 1 | 1 |   |   |                |        | S          | O          |
| <i>Picconia excelsa</i> (Aiton) DC.                                                                                       | Oleaceae       | Acc      | Acc  | Acc  | Acc  | Acc | Acc  | Acc | 3        | 1 | 1 | 1 | 1 | 1 | 1 |   |                | S      |            |            |
| <i>Picnomon acarna</i> (L.) Cass.                                                                                         | Asteraceae     | Acc      | Acc  | Acc  | Acc  | Acc | Acc  | Acc | 7        |   |   |   |   | 1 |   |   |                |        | P          |            |
| <i>Picris hieracioides</i> L.                                                                                             | Asteraceae     | Acc      | NL   | Acc  | AmUn | Acc | Acc  | Acc | 2        |   |   |   |   |   |   |   |                | P      |            |            |
| <i>Pilea microphylla</i> (L.) Liebm.                                                                                      | Urticaceae     | NL       | NL   | Acc  | Acc  | Acc | Acc  | Acc | 22       |   | 1 |   | 1 |   |   |   |                |        | S          |            |
| <i>Pilosocereus pachycladus</i> F.Ritter                                                                                  | Cactaceae      | NL       | NL   | Acc  | Acc  | Acc | Acc  | Acc | 23       |   |   |   | 1 |   |   | 1 |                | S      |            | O          |
| <i>Pimpinella anagodendron</i> Bolle                                                                                      | Apiaceae       | Acc      | Acc  | Acc  | AmUn | Acc | Acc  | NL  | 1        |   |   |   | 1 |   |   |   | T              | S      |            |            |
| <i>Pimpinella cumbrae</i> Link.                                                                                           | Apiaceae       | Acc      | Acc  | Acc  | AmUn | Acc | Acc  | Acc | 3        |   | 1 |   | 1 |   |   |   | A              | S      |            |            |
| <i>Pimpinella dendroselinum</i> Webb                                                                                      | Apiaceae       | Syn      | Acc  | Acc  | AmUn | Acc | Acc  | Syn | 2        |   | 1 |   | 1 |   |   |   | A              | S      |            |            |
| <i>Pimpinella junoniae</i> Ceballos & Ortuno                                                                              | Apiaceae       | Acc      | Acc  | Acc  | AmUn | Acc | Acc  | Syn | 0        |   |   | 1 |   |   |   |   | G              | S      |            |            |
| <i>Pinus canariensis</i> C.Sm.                                                                                            | Pinaceae       | Acc      | Acc  | Acc  | Acc  | Acc | Acc  | Acc | 0        | 1 | 1 | 1 | 1 | 1 |   |   | A              | S      |            |            |
| <i>Pinus halepensis</i> Mill.                                                                                             | Pinaceae       | Acc      | Acc  | Acc  | Acc  | Acc | Acc  | Acc | 19       | 1 | 1 | 1 | 1 | 1 | 1 | 1 |                |        | S          | C          |
| <i>Pinus nigra</i> J.F.Arnold                                                                                             | Pinaceae       | NL       | NL   | Acc  | Acc  | Acc | Acc  | Acc | 0        |   |   |   | 1 |   |   |   |                |        | S          | C          |
| <i>Pinus pinaster</i> Aiton                                                                                               | Pinaceae       | Acc      | Acc  | Acc  | Acc  | Acc | Acc  | Acc | 1        |   |   |   | 1 | 1 |   |   |                |        | S          | C          |
| <i>Pinus pinea</i> L.                                                                                                     | Pinaceae       | Acc      | Acc  | Acc  | Acc  | Acc | Acc  | Acc | 7        |   |   |   |   | 1 |   |   |                |        | I          | C          |
| <i>Pinus radiata</i> D.Don                                                                                                | Pinaceae       | Acc      | Acc  | Acc  | Acc  | Acc | Acc  | Acc | 0        | 1 | 1 | 1 | 1 | 1 |   | 1 |                |        | I          | C          |
| <i>Pinus sylvestris</i> L.                                                                                                | Pinaceae       | NL       | NL   | Acc  | Acc  | Acc | Acc  | Acc | 1        |   |   |   |   |   |   |   |                |        | S          | C          |

| Species Name                                                                              | Family         | Atlantis | Muer | POWO | WFO  | COL  | GBIF | TRY | POWO Syn | H | P | G | T | C | F | L | Endemic Status | Native | Non native | Ornam Crop |
|-------------------------------------------------------------------------------------------|----------------|----------|------|------|------|------|------|-----|----------|---|---|---|---|---|---|---|----------------|--------|------------|------------|
| <i>Piptatherum coerulescens</i> (Desf.) P.Beauv.                                          | Poaceae        | Acc      | Acc  | Acc  | Acc  | Acc  | Acc  | Acc | 5        | 1 |   | 1 | 1 | 1 |   | 1 |                | P      |            |            |
| <i>Pistacia atlantica</i> Desf.                                                           | Anacardiaceae  | Acc      | Acc  | Acc  | Acc  | Acc  | Acc  | Acc | 7        |   | 1 | 1 | 1 | 1 | 1 |   |                | S      |            | O          |
| <i>Pistacia lentiscus</i> L.                                                              | Anacardiaceae  | Acc      | Acc  | Acc  | Acc  | Acc  | Acc  | Acc | 7        |   |   | 1 | 1 | 1 | 1 | 1 |                | S      |            | O          |
| <i>Pistacia terebinthus</i> L.                                                            | Anacardiaceae  | NL       | NL   | Acc  | Acc  | Acc  | Acc  | Acc | 6        |   | 1 |   | 1 | 1 |   |   |                | P      |            | O          |
| <i>Pistia stratiotes</i> L.                                                               | Araceae        | Acc      | Acc  | Acc  | Acc  | Acc  | Acc  | Acc | 27       |   | 1 | 1 | 1 | 1 | 1 | 1 |                |        | S          | O          |
| <i>Pittosporum coriaceum</i> Aiton                                                        | Pittosporaceae | NL       | NL   | Acc  | Acc  | Acc  | Acc  | Acc | 0        |   |   |   | 1 |   |   |   | T              | S      |            |            |
| <i>Pittosporum tobira</i> (Thunb.) W.T.Aiton                                              | Pittosporaceae | NL       | NL   | Acc  | Acc  | Acc  | Acc  | Acc | 3        |   |   |   | 1 | 1 |   |   |                |        | S          | O          |
| <i>Pittosporum undulatum</i> Vent.                                                        | Pittosporaceae | Acc      | Acc  | Acc  | Acc  | Acc  | Acc  | Acc | 0        |   |   |   | 1 | 1 |   |   |                |        | I          | O          |
| <i>Plantago afra</i> L.                                                                   | Plantaginaceae | Acc      | Acc  | Acc  | Acc  | Acc  | Acc  | Acc | 21       | 1 | 1 | 1 | 1 | 1 | 1 | 1 |                | P      |            |            |
| <i>Plantago albicans</i> L.                                                               | Plantaginaceae | Acc      | Acc  | Acc  | Acc  | Acc  | Acc  | Acc | 8        |   |   |   | 1 | 1 | 1 | 1 |                | P      |            |            |
| <i>Plantago amplexicaulis</i> Cav.                                                        | Plantaginaceae | Acc      | Acc  | Acc  | Acc  | Acc  | Acc  | Acc | 2        | 1 | 1 | 1 | 1 | 1 | 1 | 1 |                | P      |            |            |
| <i>Plantago arborescens</i> Poir. subsp. <i>arborescens</i>                               | Plantaginaceae | Acc      | Acc  | NL   | NL   | Acc  | Acc  | NL  |          | 1 | 1 | 1 | 1 | 1 |   |   | A              | S      |            |            |
| <i>Plantago arborescens</i> Poir. subsp. <i>maderensis</i> (Decne.) A. Hansen & G. Kunkel | Plantaginaceae | Acc      | Acc  | Acc  | NL   | Acc  | Acc  | Acc | 3        |   |   |   |   | 1 |   |   |                | S      |            |            |
| <i>Plantago asphodeloides</i> Svent. var. <i>asphodeloides</i>                            | Plantaginaceae | NL       | Acc  | NL   | NL   | AmUn | Acc  | NL  |          |   |   | 1 | 1 |   |   |   | A              | S      |            |            |
| <i>Plantago asphodeloides</i> Svent. var. <i>oligostachya</i> Svent.                      | Plantaginaceae | NL       | Acc  | NL   | NL   | Acc  | Acc  | NL  |          |   |   |   |   | 1 |   |   | C              | S      |            |            |
| <i>Plantago bellardii</i> All.                                                            | Plantaginaceae | Acc      | Acc  | Acc  | AmUn | Acc  | Acc  | Acc | 10       | 1 |   |   | 1 |   |   |   |                |        | P          |            |
| <i>Plantago ciliata</i> Desf.                                                             | Plantaginaceae | Acc      | Acc  | Acc  | Acc  | Acc  | Acc  | Acc | 4        |   |   |   |   | 1 | 1 |   |                | P      |            |            |
| <i>Plantago coronopus</i> L.                                                              | Plantaginaceae | Acc      | Syn  | Acc  | Acc  | Acc  | Acc  | Acc | 26       | 1 | 1 | 1 | 1 | 1 | 1 | 1 | A              | P      |            |            |
| <i>Plantago famaræ</i> Svent.                                                             | Plantaginaceae | Acc      | Acc  | Acc  | AmUn | Acc  | Acc  | Acc | 1        |   |   |   |   |   |   | 1 | L              | S      |            |            |
| <i>Plantago lagopus</i> L.                                                                | Plantaginaceae | Acc      | Acc  | Acc  | Acc  | Acc  | Acc  | Acc | 17       | 1 | 1 | 1 | 1 | 1 | 1 | 1 |                | P      |            |            |
| <i>Plantago lanceolata</i> L.                                                             | Plantaginaceae | Acc      | Acc  | Acc  | Acc  | Acc  | Acc  | Acc | 59       | 1 |   |   | 1 | 1 |   |   |                | P      |            |            |
| <i>Plantago loeflingii</i> L.                                                             | Plantaginaceae | Acc      | Acc  | Acc  | Acc  | Acc  | Acc  | Acc | 4        | 1 |   | 1 | 1 | 1 |   |   |                | P      |            |            |
| <i>Plantago major</i> L.                                                                  | Plantaginaceae | Acc      | Acc  | Acc  | Acc  | Acc  | Acc  | Acc | 99       | 1 | 1 | 1 | 1 | 1 | 1 | 1 |                |        | P          |            |

| Species Name                                                                      | Family         | Atlantis | Muer | POWO | WFO  | COL  | GBIF | TRY | POWO Syn | H | P | G | T | C | F | L | Endemic Status | Native | Non native | Ornam Crop |
|-----------------------------------------------------------------------------------|----------------|----------|------|------|------|------|------|-----|----------|---|---|---|---|---|---|---|----------------|--------|------------|------------|
| <i>Plantago ovata</i> Forssk.                                                     | Plantaginaceae | Acc      | Acc  | Acc  | Acc  | Acc  | Acc  | Acc | 24       |   | 1 | 1 | 1 | 1 | 1 | 1 |                | P      |            |            |
| <i>Plantago phaeostoma</i> Boiss. & Heldr.                                        | Plantaginaceae | Acc      | Acc  | Acc  | Acc  | Acc  | Acc  | Acc | 1        |   |   |   |   |   | 1 | 1 |                | P      |            |            |
| <i>Plantago webbii</i> Barneoud                                                   | Plantaginaceae | Acc      | Acc  | Acc  | AmUn | Acc  | Acc  | Acc | 2        |   | 1 |   | 1 | 1 |   |   | A              | S      |            |            |
| <i>Platycapnos spicatus</i> (L.) Bernh.                                           | Papaveraceae   | Acc      | Acc  | Acc  | Acc  | AmUn | Acc  | NL  | 3        |   |   |   | 1 |   | 1 |   |                | P      |            |            |
| <i>Platyserium bifurcatum</i> (Cav.) C.Chr.                                       | Polypodiaceae  | Acc      | Acc  | Acc  | Acc  | Acc  | Acc  | Acc | 2        |   | 1 |   |   |   |   |   |                |        | I          | O          |
| <i>Pleiomeris canariensis</i> (Wild.) A.Dc.                                       | Primulaceae    | Acc      | Acc  | Acc  | Acc  | Acc  | Acc  | Acc | 3        |   | 1 | 1 | 1 | 1 |   |   | A              | S      |            |            |
| <i>Plerandra elegantissima</i> (H.J.Veitch ex Mast.) Lowry, G.M.Plunkett & Frodin | Araliaceae     | NL       | NL   | Acc  | Syn  | Acc  | Acc  | Syn | 5        |   | 1 |   | 1 |   |   |   |                |        | S          |            |
| <i>Plocama pendula</i> Aiton                                                      | Rubiaceae      | Acc      | Acc  | Acc  | Acc  | Acc  | Acc  | Acc | 1        | 1 | 1 | 1 | 1 | 1 | 1 |   | A              | S      |            |            |
| <i>Pluchea carolinensis</i> (Jacq.) D.Don                                         | Asteraceae     | Acc      | Acc  | Acc  | Acc  | Acc  | Acc  | Acc | 4        |   |   |   |   | 1 |   |   |                |        | S          |            |
| <i>Pluchea dioscoridis</i> (L.) DC.                                               | Asteraceae     | Acc      | Acc  | Acc  | Acc  | Acc  | Acc  | Acc | 13       |   |   |   | 1 |   |   |   |                |        | S          |            |
| <i>Pluchea ovalis</i> (Pers.) DC.                                                 | Asteraceae     | Acc      | Acc  | Acc  | Acc  | Acc  | Acc  | Acc | 7        |   |   |   | 1 |   |   |   |                |        | I          |            |
| <i>Plumbago auriculata</i> Lam.                                                   | Plumbaginaceae | Acc      | Acc  | Acc  | Acc  | Acc  | Acc  | Acc | 5        |   | 1 | 1 | 1 | 1 |   |   |                |        | S          | O          |
| <i>Plumeria obtusa</i> L.                                                         | Apocynaceae    | NL       | NL   | Acc  | Acc  | Acc  | Acc  | Acc | 24       |   | 1 | 1 | 1 |   |   |   |                |        | S          | O          |
| <i>Plumeria rubra</i> L.                                                          | Apocynaceae    | NL       | NL   | Acc  | Acc  | Acc  | Acc  | Acc | 34       |   | 1 |   |   | 1 |   |   |                |        | S          | O          |
| <i>Poa angustifolia</i> L.                                                        | Poaceae        | Acc      | Acc  | Acc  | Acc  | Acc  | Acc  | Acc | 18       |   | 1 | 1 | 1 |   |   |   |                | P      |            |            |
| <i>Poa annua</i> L. subsp. <i>annua</i>                                           | Poaceae        | Syn      | NL   | NL   | Syn  | AmUn | Acc  | NL  |          | 1 | 1 | 1 | 1 | 1 | 1 | 1 |                | P      |            |            |
| <i>Poa annua</i> L. subsp. <i>raniglumis</i> (S.E. Fröhner) Chrtk                 | Poaceae        | Syn      | Acc  | NL   | Syn  | Syn  | Syn  | NL  |          | 1 | 1 |   |   |   |   |   |                | P      |            |            |
| <i>Poa bulbosa</i> L.                                                             | Poaceae        | Acc      | Acc  | Acc  | Acc  | Acc  | Acc  | Acc | 22       | 1 |   |   | 1 | 1 |   |   |                | S      |            |            |
| <i>Poa infirma</i> Kunth                                                          | Poaceae        | Syn      | Acc  | Acc  | Acc  | Acc  | Acc  | Acc | 9        |   | 1 |   | 1 | 1 | 1 | 1 |                | P      |            |            |
| <i>Poa leptoclada</i> Hochst. ex A.Rich.                                          | Poaceae        | Acc      | Acc  | Acc  | Acc  | Acc  | Acc  | Acc | 4        |   | 1 |   | 1 |   |   |   |                | P      |            |            |
| <i>Poa pitardiana</i> H.Scholz                                                    | Poaceae        | Acc      | Acc  | Acc  | Acc  | Acc  | Acc  | Acc | 0        |   |   | 1 | 1 | 1 |   |   | A              | S      |            |            |
| <i>Poa pratensis</i> L.                                                           | Poaceae        | Acc      | Acc  | Acc  | Acc  | Acc  | Acc  | Acc | 77       |   |   |   | 1 | 1 |   |   |                | P      |            |            |
| <i>Poa trivialis</i> L.                                                           | Poaceae        | Acc      | Acc  | Acc  | Acc  | Acc  | Acc  | Acc | 34       |   |   |   | 1 |   |   | 1 |                | P      |            |            |



| Species Name                                                                               | Family          | Atlantis | Muer | POWO | WFO  | COL | GBIF | TRY | POWO Syn | H | P | G | T | C | F | L | Endemic Status | Native | Non native | Ornam Crop |
|--------------------------------------------------------------------------------------------|-----------------|----------|------|------|------|-----|------|-----|----------|---|---|---|---|---|---|---|----------------|--------|------------|------------|
| <i>Podranea ricasoliana</i> (Tanfani) Sprague                                              | Bignoniaceae    | Acc      | NL   | Acc  | Acc  | Acc | Acc  | Acc | 3        |   | 1 |   | 1 |   | 1 |   |                |        | S          | O          |
| <i>Polycarpaea aristata</i> (Aiton) C.Sm. Ex DC:                                           | Caryophyllaceae | Acc      | Acc  | Acc  | AmUn | Acc | Acc  | Acc | 3        |   | 1 |   | 1 | 1 |   |   | A              | S      |            |            |
| <i>Polycarpaea carnosa</i> C.Sm. Ex Buch                                                   | Caryophyllaceae | Acc      | Acc  | Acc  | AmUn | Acc | Acc  | Acc | 1        |   |   | 1 | 1 | 1 |   |   | A              | S      |            |            |
| <i>Polycarpaea corymbosa</i> (L.) Lam.                                                     | Caryophyllaceae | Syn      | Syn  | Acc  | Acc  | Acc | Acc  | Acc | 22       |   |   | 1 | 1 | 1 |   |   | A              | S      |            |            |
| <i>Polycarpaea divaricata</i> (Aiton) Poir. ex Steud.                                      | Caryophyllaceae | Acc      | Acc  | Acc  | AmUn | Acc | Acc  | Acc | 7        | 1 | 1 | 1 | 1 | 1 | 1 | 1 | A              | S      |            |            |
| <i>Polycarpaea latifolia</i> (Willd.) Poir.                                                | Caryophyllaceae | Acc      | Acc  | Acc  | AmUn | Acc | Acc  | Acc | 3        |   |   | 1 | 1 | 1 |   |   | A              | S      |            |            |
| <i>Polycarpaea nivea</i> (Aiton) Webb                                                      | Caryophyllaceae | Acc      | Acc  | Acc  | Acc  | Acc | Acc  | Acc | 17       |   | 1 |   | 1 | 1 | 1 | 1 |                | S      |            |            |
| <i>Polycarpaea robusta</i> (Pit.) G.Kunkel                                                 | Caryophyllaceae | Acc      | Acc  | Acc  | AmUn | Acc | Acc  | NL  | 0        |   |   |   |   |   |   | 1 | L              | S      |            |            |
| <i>Polycarpaea smithii</i> Link                                                            | Caryophyllaceae | Acc      | Acc  | Acc  | AmUn | Acc | Acc  | Acc | 2        | 1 | 1 | 1 |   |   |   |   | A              | S      |            |            |
| <i>Polycarpaea tenuis</i> Webb ex Christ                                                   | Caryophyllaceae | Acc      | Acc  | Acc  | AmUn | Acc | Acc  | NL  | 0        |   | 1 |   | 1 |   |   |   | A              | S      |            |            |
| <i>Polycarpon alsinifolium</i> (Biv.) Arcang.                                              | Caryophyllaceae | Acc      | Acc  | Acc  | Syn  | Acc | Acc  | Syn | 5        |   |   |   |   |   |   | 1 |                | P      |            |            |
| <i>Polycarpon tetraphyllum</i> (L.) L. subsp. <i>diphyllum</i> (Cav.) O. Bolòs & Font Quer | Caryophyllaceae | Acc      | NL   | NL   | Acc  | Acc | Acc  | Acc |          | 1 | 1 | 1 | 1 | 1 | 1 | 1 |                | P      |            |            |
| <i>Polygonum arenastrum</i> Boreau                                                         | Polygonaceae    | Acc      | NL   | Acc  | Acc  | Acc | Acc  | Acc | 28       |   | 1 |   |   |   |   |   |                |        | S          |            |
| <i>Polygonum aviculare</i> L. subsp. <i>aviculare</i>                                      | Polygonaceae    | Acc      | NL   | NL   | Syn  | Acc | Acc  | NL  |          | 1 | 1 | 1 | 1 | 1 | 1 | 1 |                | P      |            |            |
| <i>Polygonum balansae</i> Boiss. subsp. <i>balansae</i>                                    | Polygonaceae    | Acc      | NL   | NL   | NL   | Acc | Acc  | NL  |          |   |   |   | 1 | 1 |   |   |                | S      |            |            |
| <i>Polygonum equisetiforme</i> Sm.                                                         | Polygonaceae    | Acc      | Acc  | Acc  | Acc  | Acc | Acc  | Acc | 10       |   |   |   |   | 1 | 1 |   |                | P      |            |            |
| <i>Polygonum maritimum</i> L.                                                              | Polygonaceae    | Acc      | Acc  | Acc  | Acc  | Acc | Acc  | Acc | 8        |   | 1 |   | 1 | 1 | 1 | 1 |                | S      |            |            |
| <i>Polygonum rurivagum</i> Jord. et Boreau                                                 | Polygonaceae    | Syn      | NL   | Acc  | Acc  | Syn | Syn  | Acc | 5        | 1 |   |   |   |   |   |   |                |        | S          |            |
| <i>Polypodium macaronesicum</i> A.E. Bobrov subsp. <i>macaronesicum</i>                    | Polypodiaceae   | Acc      | NL   | NL   | NL   | Acc | Acc  | NL  |          | 1 | 1 | 1 | 1 | 1 | 1 | 1 |                | S      |            |            |
| <i>Polypogon fugax</i> Nees ex Steud.                                                      | Poaceae         | Acc      | Syn  | Acc  | Acc  | Acc | Acc  | Acc | 3        | 1 | 1 | 1 | 1 | 1 | 1 | 1 |                | P      |            |            |
| <i>Polypogon maritimus</i> Willd.                                                          | Poaceae         | Acc      | Syn  | Acc  | Acc  | Acc | Acc  | Acc | 11       |   |   |   | 1 | 1 | 1 | 1 |                | P      |            |            |
| <i>Polypogon monspeliensis</i> (L.) Desf.                                                  | Poaceae         | Acc      | Acc  | Acc  | Acc  | Acc | Acc  | Acc | 31       | 1 | 1 | 1 | 1 | 1 | 1 | 1 |                | P      |            |            |
| <i>Polypogon viridis</i> (Gouan) Breistr.                                                  | Poaceae         | Acc      | Acc  | Acc  | Acc  | Acc | Acc  | Acc | 26       | 1 | 1 | 1 | 1 | 1 | 1 | 1 |                | P      |            |            |

| Species Name                                                      | Family           | Atlantis | Muer | POWO | WFO  | COL | GBIF | TRY | POWO Syn | H | P | G | T | C | F | L | Endemic Status | Native | Non native | Ornam Crop |
|-------------------------------------------------------------------|------------------|----------|------|------|------|-----|------|-----|----------|---|---|---|---|---|---|---|----------------|--------|------------|------------|
| <i>Polystichum aculeatum</i> (L.) Roth ex Mert.                   | Dryopteridaceae  | Acc      | Acc  | Acc  | Acc  | Acc | Acc  | Acc | 27       |   | 1 | 1 | 1 |   |   |   |                | S      |            |            |
| <i>Polystichum setiferum</i> (Forssk.) Moore ex Woyn              | Dryopteridaceae  | Acc      | Acc  | Acc  | Acc  | Acc | Acc  | Acc | 10       | 1 | 1 | 1 | 1 |   |   |   |                | S      |            |            |
| <i>Pontederia crassipes</i> Mart.                                 | Pontederiaceae   | NL       | NL   | Acc  | Syn  | Syn | Acc  | Syn | 9        |   | 1 |   | 1 |   |   |   |                |        | S          |            |
| <i>Populus alba</i> L.                                            | Salicaceae       | Acc      | Acc  | Acc  | Acc  | Acc | Acc  | Acc | 28       |   | 1 | 1 | 1 | 1 | 1 |   |                |        | I          | O          |
| <i>Populus nigra</i> L.                                           | Salicaceae       | Acc      | Acc  | Acc  | Acc  | Acc | Acc  | Acc | 36       |   |   |   |   | 1 |   |   |                |        | S          | O          |
| <i>Portulaca canariensis</i> Danin & Reyes-Bet.                   | Portulaccaceae   | Acc      | Acc  | Acc  | Acc  | Acc | Acc  | NL  | 0        |   |   |   | 1 |   | 1 | 1 | A              | S      |            |            |
| <i>Portulaca granulatastellulata</i> (Poelln.) Ricceri & Arrigoni | Portulaccaceae   | Acc      | Acc  | Acc  | Acc  | Acc | Acc  | Acc | 1        | 1 | 1 |   | 1 | 1 |   | 1 |                |        | S          |            |
| <i>Portulaca nicaraguensis</i> (Danin & H.G.Baker) Danin          | Portulaccaceae   | Acc      | Acc  | Acc  | Acc  | Acc | Acc  | NL  | 1        |   | 1 |   | 1 |   |   |   |                |        | S          |            |
| <i>Portulaca nitida</i> (Danin & H.G.Baker) Ricceri & Arrigoni    | Portulaccaceae   | Acc      | Acc  | Acc  | Acc  | Acc | Acc  | Acc | 1        |   | 1 |   | 1 |   |   | 1 |                |        | S          |            |
| <i>Portulaca oleracea</i> L.                                      | Portulaccaceae   | Acc      | Acc  | Acc  | Acc  | Acc | Acc  | Acc | 33       | 1 | 1 | 1 | 1 | 1 | 1 | 1 |                |        | S          | C          |
| <i>Portulaca papillatostellulata</i> (Danin & H.G.Baker) Danin    | Portulaccaceae   | Acc      | Syn  | Acc  | Acc  | Syn | Syn  | Acc | 1        |   | 1 |   | 1 |   |   |   |                |        | S          |            |
| <i>Portulacaria afra</i> Jacq.                                    | Didieraceae      | NL       | NL   | Acc  | Acc  | Acc | Acc  | Acc | 2        |   | 1 | 1 | 1 | 1 | 1 | 1 |                |        | S          | O          |
| <i>Potamogeton nodosus</i> Poir.                                  | Potamogetonaceae | Acc      | Acc  | Acc  | Acc  | Acc | Acc  | Acc | 33       |   |   | 1 | 1 | 1 |   |   |                | P      |            |            |
| <i>Potamogeton pusillus</i> L.                                    | Potamogetonaceae | Acc      | Acc  | Acc  | Acc  | Acc | Acc  | Acc | 43       |   |   |   | 1 | 1 |   |   |                | P      |            |            |
| <i>Potamogeton trichoides</i> Cham. & Schldtl.                    | Potamogetonaceae | Acc      | Acc  | Acc  | Acc  | Acc | Acc  | Acc | 7        |   |   |   | 1 | 1 |   |   |                | P      |            |            |
| <i>Potentilla indica</i> (Andrews) Th.Wolf                        | Rosaceae         | Acc      | Acc  | Acc  | AmUn | Acc | Acc  | Acc | 15       |   |   |   | 1 |   |   |   |                |        | S          |            |
| <i>Potentilla reptans</i> L.                                      | Rosaceae         | Acc      | Acc  | Acc  | Acc  | Acc | Acc  | Acc | 14       |   |   | 1 |   |   |   |   |                |        | S          |            |
| <i>Prasium majus</i> L.                                           | Lamiaceae        | Acc      | Acc  | Acc  | Acc  | Acc | Acc  | Acc | 4        |   |   |   | 1 |   |   |   |                |        | S          |            |
| <i>Prosopis juliflora</i> (Sw.) DC.                               | Fabaceae         | Acc      | Acc  | Acc  | Acc  | Acc | Acc  | Acc | 5        |   |   |   |   | 1 |   |   |                |        | I          | O          |
| <i>Prunella vulgaris</i> L.                                       | Lamiaceae        | Acc      | Acc  | Acc  | Acc  | Acc | Acc  | Acc | 0        |   | 1 |   | 1 | 1 |   |   |                |        | S          |            |
| <i>Prunus cerasus</i> L.                                          | Rosaceae         | Acc      | Acc  | Acc  | AmUn | Acc | Acc  | Acc | 33       |   | 1 |   | 1 | 1 |   |   |                |        | S          | C          |
| <i>Prunus domestica</i> L. subsp. <i>italica</i> (Borkh.) Gams    | Rosaceae         | NL       | Acc  | NL   | Acc  | NL  | Acc  | NL  |          |   |   | 1 | 1 | 1 |   |   |                |        | S          | C          |
| <i>Prunus dulcis</i> (Mill.) D.A.Webb                             | Rosaceae         | Acc      | Acc  | Syn  | Acc  | Acc | Acc  | Acc |          | 1 | 1 | 1 | 1 | 1 | 1 | 1 |                |        | I          | C          |

| Species Name                                                                                     | Family           | Atlantis | Muer | POWO | WFO  | COL  | GBIF | TRY | POWO Syn | H | P | G | T | C | F | L | Endemic Status | Native | Non native | Ornam Crop |
|--------------------------------------------------------------------------------------------------|------------------|----------|------|------|------|------|------|-----|----------|---|---|---|---|---|---|---|----------------|--------|------------|------------|
| <i>Prunus lusitanica</i> L. subsp. <i>hixa</i> (Willd.) Franco                                   | Rosaceae         | Acc      | Syn  | NL   | Syn  | Syn  | Syn  | NL  |          | 1 | 1 | 1 | 1 | 1 |   |   |                | S      |            |            |
| <i>Pseudosasa japonica</i> (Steud.) Makino                                                       | Poaceae          | Acc      | Acc  | Acc  | Acc  | Acc  | Acc  | Acc | 7        |   |   | 1 |   | 1 |   |   |                |        | S          | O          |
| <i>Psidium guajava</i> L.                                                                        | Myrtaceae        | Acc      | Acc  | Acc  | Acc  | Acc  | Acc  | Acc | 29       |   | 1 |   | 1 |   |   |   |                |        | S          | C          |
| <i>Psilotum nudum</i> (L.) P. Beauv.                                                             | Psilotaceae      | Acc      | Acc  | Acc  | Acc  | Acc  | Acc  | Acc | 20       |   | 1 |   | 1 |   |   | 1 |                |        | S          |            |
| <i>Pteranthus dichotomus</i> Forssk.                                                             | Caryophyllaceae  | Acc      | Acc  | Acc  | Acc  | Acc  | Acc  | Acc | 6        |   |   |   |   |   | 1 | 1 |                | P      |            |            |
| <i>Pteridium aquilinum</i> (L.) Kuhn                                                             | Dennstaedtiaceae | Acc      | Acc  | Acc  | Acc  | Acc  | Acc  | Acc | 45       | 1 | 1 | 1 | 1 | 1 |   | 1 |                | P      |            |            |
| <i>Pteris cretica</i> L.                                                                         | Pteridaceae      | Acc      | Acc  | Acc  | Acc  | Acc  | Acc  | Acc | 1        |   |   |   |   | 1 |   |   |                |        | S          |            |
| <i>Pteris incompleta</i> Cav.                                                                    | Pteridaceae      | Acc      | Acc  | Acc  | AmUn | Acc  | Acc  | Acc | 3        |   | 1 | 1 | 1 | 1 |   |   |                | S      |            |            |
| <i>Pteris multifida</i> Poir.                                                                    | Pteridaceae      | Acc      | Acc  | Acc  | Acc  | Acc  | Acc  | Acc | 4        | 1 |   |   |   |   |   |   |                |        | S          |            |
| <i>Pteris tremula</i> R.Br.                                                                      | Pteridaceae      | Acc      | Acc  | Acc  | Acc  | Acc  | Acc  | Acc | 3        |   |   |   | 1 | 1 |   |   |                |        | S          |            |
| <i>Pteris vittata</i> L.                                                                         | Pteridaceae      | Acc      | Acc  | Acc  | Acc  | Acc  | Acc  | Acc | 1        |   | 1 | 1 | 1 | 1 |   |   |                |        | S          | O          |
| <i>Pterocephalus dumetorum</i> (Brouss. ex Willd.) Coult.                                        | Caprifoliaceae   | Acc      | Acc  | Acc  | AmUn | AmUn | Acc  | Syn | 2        |   | 1 |   | 1 | 1 |   |   | A              | S      |            |            |
| <i>Pterocephalus lasiospermus</i> Link                                                           | Caprifoliaceae   | Acc      | Acc  | Acc  | AmUn | Acc  | Acc  | NL  | 2        |   |   |   | 1 |   |   |   | T              | S      |            |            |
| <i>Pterocephalus porphyranthus</i> Svent.                                                        | Caprifoliaceae   | Acc      | Acc  | Acc  | AmUn | Acc  | Acc  | NL  | 0        |   | 1 |   |   |   |   |   | P              | S      |            |            |
| <i>Pterocephalus virens</i> Webb & Berthel.                                                      | Caprifoliaceae   | Acc      | Acc  | Acc  | AmUn | Acc  | Acc  | Acc | 1        |   |   |   | 1 |   |   |   | T              | S      |            |            |
| <i>Puccinellia maritima</i> (Huds.) Parl.                                                        | Poaceae          | Acc      | Acc  | Acc  | Acc  | Acc  | Acc  | Acc | 29       |   |   |   | 1 |   |   |   |                | P      |            |            |
| <i>Pulicaria burchardii</i> Hutch. subsp. <i>burchardii</i>                                      | Asteraceae       | Acc      | Acc  | NL   | Syn  | AmUn | Acc  | NL  |          |   |   |   |   |   | 1 |   |                | S      |            |            |
| <i>Pulicaria canariensis</i> Bolle subsp. <i>canariensis</i>                                     | Asteraceae       | Acc      | Acc  | Acc  | Acc  | Acc  | Acc  | NL  | 0        |   |   |   |   |   | 1 | 1 | A              | S      |            |            |
| <i>Pulicaria canariensis</i> Bolle subsp. <i>lanata</i> (Font Quer & Svent.) Bramwell & G.Kunkel | Asteraceae       | Acc      | Acc  | Acc  | AmUn | Acc  | Acc  | NL  | 0        |   |   |   |   |   | 1 | 1 | A              | S      |            |            |
| <i>Pulicaria odora</i> (L.) Rchb.                                                                | Asteraceae       | Acc      | Acc  | Acc  | Acc  | Acc  | Acc  | Acc | 5        |   |   |   |   | 1 |   |   |                | P      |            |            |
| <i>Pulicaria paludosa</i> Link.                                                                  | Asteraceae       | Syn      | Acc  | Acc  | AmUn | Acc  | Acc  | Syn | 1        |   |   |   | 1 |   |   |   |                | P      |            |            |
| <i>Pulicaria undulata</i> (L.) C.A.Mey. subsp. <i>undulata</i>                                   | Asteraceae       | Acc      | Acc  | Acc  | Syn  | Acc  | Acc  | Syn | 8        |   |   |   |   | 1 |   |   |                | P      |            |            |
| <i>Punica granatum</i> L.                                                                        | Lythraceae       | Acc      | Acc  | Acc  | Acc  | Acc  | Acc  | Acc | 6        | 1 | 1 | 1 | 1 | 1 | 1 | 1 |                |        | S          | C          |
| <i>Pyrostegia venusta</i> (Ker Gawl.) Miers                                                      | Bignoniaceae     | Acc      | Acc  | Acc  | Acc  | Acc  | Acc  | Acc | 18       |   | 1 |   | 1 | 1 |   |   |                |        | S          | O          |

| Species Name                                                     | Family        | Atlantis | Muer | POWO | WFO  | COL  | GBIF | TRY | POWO Syn | H | P | G | T | C | F | L | Endemic Status | Native | Non native | Ornam Crop |
|------------------------------------------------------------------|---------------|----------|------|------|------|------|------|-----|----------|---|---|---|---|---|---|---|----------------|--------|------------|------------|
| <i>Pyrus communis</i> L.                                         | Rosaceae      | Acc      | Acc  | Acc  | AmUn | Acc  | Acc  | Acc | 26       |   |   |   | 1 |   |   |   |                |        | S          | C          |
| <i>Quercus ilex</i> L.                                           | Fagaceae      | Acc      | Acc  | Acc  | Acc  | Acc  | Acc  | Acc | 28       |   | 1 | 1 | 1 | 1 |   |   |                |        | S          | O          |
| <i>Quercus robur</i> L.                                          | Fagaceae      | Acc      | Acc  | Acc  | Acc  | Acc  | Acc  | Acc | 1        |   |   |   | 1 | 1 |   |   |                |        | S          | O          |
| <i>Quercus rotundifolia</i> Lam.                                 | Fagaceae      | Acc      | NL   | Acc  | Acc  | Acc  | Acc  | Acc | 16       |   |   |   |   |   |   | 1 |                |        | S          | O          |
| <i>Quercus suber</i> L.                                          | Fagaceae      | Acc      | Acc  | Acc  | Acc  | Acc  | Acc  | Acc | 9        |   |   |   | 1 | 1 |   |   |                |        | S          | O          |
| <i>Radiola linoides</i> Roth                                     | Linaceae      | Acc      | Acc  | Acc  | Acc  | Acc  | Acc  | Acc | 10       | 1 | 1 |   | 1 | 1 |   |   |                |        | P          |            |
| <i>Ranunculus aquatilis</i> L.                                   | Ranunculaceae | NL       | NL   | Acc  | Acc  | Acc  | Acc  | Acc | 59       |   |   |   | 1 |   |   |   |                |        | P          |            |
| <i>Ranunculus arvensis</i> L.                                    | Ranunculaceae | Acc      | Acc  | Acc  | Acc  | Acc  | Acc  | Acc | 12       |   |   |   |   | 1 |   |   |                | P      |            |            |
| <i>Ranunculus baudotii</i> Godr.                                 | Ranunculaceae | NL       | NL   | Acc  | Syn  | Syn  | Acc  | Syn | 12       |   |   |   | 1 |   |   |   |                | P      |            |            |
| <i>Ranunculus cortusifolius</i> Willd.                           | Ranunculaceae | Acc      | Acc  | Acc  | Acc  | Acc  | Acc  | Acc | 4        | 1 | 1 | 1 | 1 | 1 | 1 | 1 |                | S      |            |            |
| <i>Ranunculus ficaria</i> L.                                     | Ranunculaceae | Syn      | Acc  | Acc  | Syn  | Syn  | Syn  | Syn | 24       |   |   |   | 1 |   |   |   |                |        | P          |            |
| <i>Ranunculus fluitans</i> Lam.                                  | Ranunculaceae | Acc      | Acc  | Acc  | Acc  | Acc  | Acc  | Acc | 13       |   |   |   | 1 |   |   |   |                |        | P          |            |
| <i>Ranunculus muricatus</i> L.                                   | Ranunculaceae | Acc      | Acc  | Acc  | Acc  | Acc  | Acc  | Acc | 16       | 1 | 1 | 1 | 1 | 1 |   |   |                | P      |            |            |
| <i>Ranunculus ololeucos</i> J.Lloyd                              | Ranunculaceae | Acc      | Acc  | Acc  | Acc  | Acc  | Acc  | Acc | 7        |   |   |   | 1 |   |   |   |                |        | S          |            |
| <i>Ranunculus ophioglossifolius</i> Vill.                        | Ranunculaceae | Acc      | Acc  | Acc  | Acc  | Acc  | Acc  | Acc | 13       |   |   |   | 1 |   |   |   |                | P      |            |            |
| <i>Ranunculus parviflorus</i> Loebl.                             | Ranunculaceae | Acc      | Syn  | Acc  | Acc  | Acc  | Acc  | Acc | 6        | 1 | 1 | 1 | 1 | 1 |   |   |                | P      |            |            |
| <i>Ranunculus peltatus</i> Schrank subsp. <i>peltatus</i>        | Ranunculaceae | Acc      | NL   | NL   | NL   | Acc  | Acc  | Acc |          |   |   |   | 1 |   |   |   |                | P      |            |            |
| <i>Ranunculus penicillatus</i> (Dumort.) Bab.                    | Ranunculaceae | Acc      | Acc  | Acc  | Acc  | Acc  | Acc  | Acc | 2        |   |   |   | 1 |   |   |   |                |        | S          |            |
| <i>Ranunculus repens</i> L.                                      | Ranunculaceae | Acc      | Acc  | Acc  | Acc  | Acc  | Acc  | Acc | 23       |   |   |   | 1 |   |   |   |                | P      |            |            |
| <i>Ranunculus sardous</i> Crantz                                 | Ranunculaceae | Acc      | Acc  | Acc  | Acc  | Acc  | Acc  | Acc | 24       |   |   |   | 1 | 1 |   |   |                | P      |            |            |
| <i>Ranunculus trichophyllus</i> Chair ex Vill.                   | Ranunculaceae | Acc      | Acc  | Acc  | Acc  | Acc  | Acc  | Acc | 68       |   |   |   | 1 | 1 |   |   |                |        | P          |            |
| <i>Ranunculus trilobus</i> Desf.                                 | Ranunculaceae | Acc      | Acc  | Acc  | Acc  | Acc  | Acc  | Acc | 5        | 1 | 1 | 1 | 1 | 1 |   |   |                | P      |            |            |
| <i>Raphanus raphanistrum</i> L. subsp. <i>raphanistrum</i>       | Brassicaceae  | Acc      | NL   | NL   | Syn  | Acc  | Acc  | NL  |          | 1 | 1 | 1 | 1 | 1 | 1 | 1 |                | P      |            |            |
| <i>Raphanus raphanistrum</i> L. subsp. <i>sativus</i> (L.) Domin | Brassicaceae  | Syn      | Syn  | Acc  | Acc  | AmUn | Acc  | Acc | 40       | 1 | 1 | 1 | 1 | 1 | 1 | 1 |                |        | S          |            |

| Species Name                                                            | Family          | Atlantis | Muer | POWO | WFO  | COL | GBIF | TRY | POWO Syn | H | P | G | T | C | F | L | Endemic Status | Native | Non native | Ornam Crop |
|-------------------------------------------------------------------------|-----------------|----------|------|------|------|-----|------|-----|----------|---|---|---|---|---|---|---|----------------|--------|------------|------------|
| <i>Rapistrum rugosum</i> (L.) All.                                      | Brassicaceae    | Acc      | Acc  | Acc  | Acc  | Acc | Acc  | Acc | 41       | 1 | 1 | 1 | 1 | 1 | 1 | 1 |                | P      |            |            |
| <i>Ravenala madagascariensis</i> Sonn.                                  | Musaceae        | NL       | NL   | Acc  | Acc  | Acc | Acc  | Acc | 4        |   | 1 |   | 1 |   | 1 |   |                |        | S          | O          |
| <i>Reichardia crystallina</i> (Sch.Bip. Ex Sch.Bip.) Bramwell           | Asteraceae      | Acc      | Acc  | Acc  | Acc  | Acc | Acc  | Acc | 1        |   |   |   | 1 | 1 |   |   | A              | S      |            |            |
| <i>Reichardia famarae</i> Bramwell & G.Kunkel ex M.J.Gallego & Talavera | Asteraceae      | Acc      | Acc  | Acc  | Acc  | Acc | Acc  | Acc | 0        |   |   |   |   |   | 1 | 1 | A              | S      |            |            |
| <i>Reichardia intermedia</i> (Sch.Bip) Samp.                            | Asteraceae      | NL       | NL   | Acc  | Acc  | Syn | Acc  | Acc | 4        | 1 | 1 |   | 1 | 1 | 1 | 1 |                |        | P          |            |
| <i>Reichardia ligulata</i> (Vent.) G.Kunkel & Sundig                    | Asteraceae      | Acc      | Acc  | Acc  | Acc  | Acc | Acc  | Acc | 1        | 1 | 1 | 1 | 1 | 1 | 1 |   | A              | S      |            |            |
| <i>Reichardia picroides</i> (L.) Roth                                   | Asteraceae      | NL       | NL   | Acc  | Acc  | Acc | Acc  | Acc | 22       |   |   | 1 | 1 | 1 | 1 | 1 |                |        | P          |            |
| <i>Reichardia tingitana</i> (L.) Roth                                   | Asteraceae      | Acc      | Acc  | Acc  | Acc  | Acc | Acc  | Acc | 4        |   | 1 | 1 | 1 | 1 | 1 | 1 |                | P      |            |            |
| <i>Reseda lancerotae</i> Webb ex Del.                                   | Resedaceae      | Syn      | Syn  | Acc  | Syn  | Syn | Syn  | Syn | 1        |   |   |   |   | 1 | 1 | 1 | A              | S      |            |            |
| <i>Reseda lutea</i> L.                                                  | Resedaceae      | Acc      | Acc  | Acc  | Acc  | Acc | Acc  | Acc | 28       |   |   |   |   |   | 1 |   |                | P      |            |            |
| <i>Reseda luteola</i> L.                                                | Resedaceae      | Acc      | Acc  | Acc  | Acc  | Acc | Acc  | Acc | 14       | 1 | 1 |   | 1 | 1 | 1 | 1 |                | P      |            |            |
| <i>Reseda scoparia</i> Brouss. ex Willd.                                | Resedaceae      | Acc      | Acc  | Acc  | AmUn | Acc | Acc  | Acc | 0        |   | 1 | 1 | 1 | 1 |   |   | A              | S      |            |            |
| <i>Retama monosperma</i> (L.) Boiss.                                    | Fabaceae        | Syn      | Acc  | Acc  | Acc  | Acc | Acc  | Acc | 11       | 1 | 1 | 1 | 1 | 1 | 1 |   | A              | S      |            |            |
| <i>Retama raetam</i> (Forssk.) Webb & Berthel.                          | Fabaceae        | NL       | NL   | Acc  | Acc  | Acc | Acc  | Syn | 3        |   | 1 |   | 1 |   |   | 1 |                |        | P          |            |
| <i>Rhagadiolus stellatus</i> (L.) Gaertn.                               | Asteraceae      | Acc      | Acc  | Acc  | Acc  | Acc | Acc  | Acc | 7        |   |   | 1 | 1 | 1 | 1 | 1 |                | P      |            |            |
| <i>Rhamnus alaternus</i> L.                                             | Rhamnaceae      | Acc      | Acc  | Acc  | Acc  | Acc | Acc  | Acc | 26       |   |   |   |   | 1 |   |   |                |        | I          |            |
| <i>Rhamnus crenulata</i> Aiton                                          | Rhamnaceae      | Acc      | Acc  | Acc  | AmUn | Acc | Acc  | Acc | 0        | 1 | 1 | 1 | 1 | 1 | 1 | 1 | A              | S      |            |            |
| <i>Rhamnus glandulosa</i> Aiton                                         | Rhamnaceae      | Acc      | Acc  | Acc  | AmUn | Acc | Acc  | Acc | 1        |   | 1 | 1 | 1 | 1 |   |   |                | S      |            |            |
| <i>Rhamnus integrifolia</i> DC.                                         | Rhamnaceae      | Acc      | Acc  | Acc  | AmUn | Acc | Acc  | Acc | 2        |   |   |   | 1 |   |   |   | T              | S      |            |            |
| <i>Rhodalsine geniculata</i> (Poir.) F.N.Williams                       | Caryophyllaceae | Acc      | Syn  | Acc  | Syn  | Acc | Acc  | Syn | 36       |   |   |   |   | 1 | 1 | 1 |                | P      |            |            |
| <i>Rhus coriaria</i> L.                                                 | Anacardiaceae   | Acc      | Acc  | Acc  | Acc  | Acc | Acc  | Acc | 6        | 1 | 1 | 1 | 1 | 1 |   |   |                | S      |            | O          |
| <i>Rhynchosia caribaea</i> (Jacq.) DC.                                  | Fabaceae        | Acc      | Acc  | Acc  | Acc  | Acc | Acc  | Acc | 16       |   |   |   | 1 |   |   |   |                |        | S          |            |
| <i>Ricinus communis</i> L.                                              | Euphorbiaceae   | Acc      | Acc  | Acc  | Acc  | Acc | Acc  | Acc | 77       | 1 | 1 | 1 | 1 | 1 | 1 | 1 |                |        | I          | O          |

| Species Name                                                                      | Family       | Atlantis | Muer | POWO | WFO  | COL  | GBIF | TRY | POWO Syn | H | P | G | T | C | F | L | Endemic Status | Native | Non native | Ornam Crop |
|-----------------------------------------------------------------------------------|--------------|----------|------|------|------|------|------|-----|----------|---|---|---|---|---|---|---|----------------|--------|------------|------------|
| <i>Ridolfia segetum</i> (L.) Moris                                                | Apiaceae     | Acc      | Acc  | Acc  | Acc  | Acc  | Acc  | Acc | 11       |   |   |   | 1 | 1 |   | 1 |                |        | S          |            |
| <i>Robinia pseudoacacia</i> L.                                                    | Fabaceae     | Acc      | Acc  | Acc  | Acc  | Acc  | Acc  | Acc | 45       |   |   |   |   | 1 |   |   |                |        | S          | O          |
| <i>Roldana petasitis</i> (Sims) H.Rob. & Brettell                                 | Asteraceae   | Acc      | Acc  | Acc  | Acc  | Acc  | Acc  | Acc | 3        |   |   |   | 1 | 1 |   |   |                |        | S          |            |
| <i>Romulea columnae</i> Sebast. & Mauri subsp. <i>grandiscapa</i> (Webb) G.Kunkel | Iridaceae    | NL       | Acc  | Acc  | Acc  | Acc  | Acc  | NL  | 5        | 1 | 1 | 1 | 1 | 1 | 1 | 1 |                | S      |            |            |
| <i>Rosa canina</i> L.                                                             | Rosaceae     | Acc      | Acc  | Acc  | Acc  | Acc  | Acc  | Acc | 78       |   | 1 | 1 | 1 | 1 |   |   |                | P      |            | O          |
| <i>Rosa micrantha</i> Borrer ex Sm.                                               | Rosaceae     | Acc      | NL   | Acc  | Acc  | Acc  | Acc  | Acc | 15       | 1 |   |   |   |   |   |   |                |        | P          | O          |
| <i>Rosa rubiginosa</i> L.                                                         | Rosaceae     | Acc      | NL   | Acc  | Acc  | Acc  | Acc  | Acc | 15       |   |   |   |   | 1 |   |   |                |        | P          | O          |
| <i>Rostraria cristata</i> (L.) Tzvelev                                            | Poaceae      | Acc      | Acc  | Acc  | Acc  | Acc  | Acc  | Acc | 67       | 1 | 1 | 1 | 1 | 1 | 1 | 1 |                | P      |            |            |
| <i>Rostraria pumila</i> (Desf.) Tzvelev                                           | Poaceae      | Acc      | Acc  | Acc  | Acc  | Acc  | Acc  | Acc | 17       | 1 | 1 |   | 1 | 1 | 1 | 1 |                | P      |            |            |
| <i>Rubia fruticosa</i> Aiton subsp. <i>fruticosa</i>                              | Rubiaceae    | Acc      | Acc  | NL   | NL   | AmUn | Acc  | NL  |          | 1 | 1 | 1 | 1 | 1 | 1 | 1 |                | S      |            |            |
| <i>Rubia fruticosa</i> Aiton subsp. <i>melanocarpa</i> (Bornm.) Bramwell          | Rubiaceae    | Acc      | Acc  | Syn  | Syn  | Syn  | Syn  | NL  |          |   |   | 1 | 1 | 1 |   |   | A              | S      |            |            |
| <i>Rubia fruticosa</i> Aiton subsp. <i>periclymenum</i> (schenk) Sundig           | Rubiaceae    | Acc      | Acc  | Syn  | Syn  | Syn  | Syn  | NL  |          |   | 1 | 1 | 1 | 1 |   |   | A              | S      |            |            |
| <i>Rubia occidens</i> Capelo, M.Seq. & H.Schaef.                                  | Rubiaceae    | Acc      | Acc  | Acc  | NL   | Acc  | Acc  | NL  | 0        | 1 | 1 | 1 | 1 | 1 | 1 | 1 |                | P      |            |            |
| <i>Rubus bollei</i> Focke                                                         | Rosaceae     | Acc      | Acc  | Acc  | Acc  | Acc  | Acc  | Acc | 3        | 1 | 1 | 1 | 1 | 1 | 1 |   |                | S      |            |            |
| <i>Rubus palmensis</i> A.Hansen                                                   | Rosaceae     | Acc      | Acc  | Acc  | AmUn | Acc  | Acc  | NL  | 0        |   | 1 | 1 | 1 | 1 |   |   | A              | S      |            |            |
| <i>Rubus ulmifolius</i> Schott                                                    | Rosaceae     | Acc      | Acc  | Acc  | Acc  | Acc  | Acc  | Acc | 62       | 1 | 1 | 1 | 1 | 1 | 1 |   |                | P      |            |            |
| <i>Ruellia bourgaei</i> Hemsl.                                                    | Acanthaceae  | Syn      | NL   | Acc  | Acc  | Acc  | Acc  | Acc |          |   |   |   | 1 |   |   |   |                |        | S          | O          |
| <i>Rumex acetosella</i> L. subsp. <i>angiocarpus</i> (Murb.) Murb.                | Polygonaceae | Acc      | NL   | NL   | Acc  | Acc  | Syn  | Acc |          | 1 | 1 | 1 | 1 | 1 | 1 | 1 |                |        | P          |            |
| <i>Rumex bipinnatus</i> L.f.                                                      | Polygonaceae | Acc      | Acc  | Acc  | Acc  | Acc  | Acc  | NL  | 0        |   |   |   |   |   | 1 | 1 |                | P      |            |            |
| <i>Rumex bucephalophorus</i> L. subsp. <i>canariensis</i> (Steinh.) Rchb.f.       | Polygonaceae | Acc      | Acc  | NL   | Acc  | Acc  | Acc  | NL  |          | 1 | 1 | 1 | 1 | 1 | 1 | 1 |                | S      |            |            |
| <i>Rumex bucephalophorus</i> L. subsp. <i>gallicus</i> (Steinh.) Rchb.f.          | Polygonaceae | Acc      | Acc  | NL   | Acc  | Acc  | Acc  | Acc |          |   |   |   | 1 | 1 | 1 | 1 |                | S      |            |            |

| Species Name                                                    | Family          | Atlantis | Muer | POWO | WFO  | COL | GBIF | TRY | POWO Syn | H | P | G | T | C | F | L | Endemic Status | Native | Non native | Ornam Crop |
|-----------------------------------------------------------------|-----------------|----------|------|------|------|-----|------|-----|----------|---|---|---|---|---|---|---|----------------|--------|------------|------------|
| <i>Rumex conglomeratus</i> Murray                               | Polygonaceae    | Acc      | Acc  | Acc  | Acc  | Acc | Acc  | Acc | 25       |   | 1 | 1 | 1 | 1 |   |   |                |        | P          |            |
| <i>Rumex crispus</i> L. subsp. <i>crispus</i>                   | Polygonaceae    | Acc      | NL   | NL   | NL   | Acc | Acc  | Syn |          |   |   | 1 | 1 | 1 |   | 1 |                |        | P          |            |
| <i>Rumex cristatus</i> DC.                                      | Polygonaceae    | Acc      | NL   | Acc  | Acc  | Acc | Acc  | Acc | 4        |   | 1 |   | 1 |   |   |   |                |        | S          |            |
| <i>Rumex induratus</i> Boiss. Reut.                             | Polygonaceae    | Acc      | Acc  | Acc  | Syn  | Acc | Acc  | Syn | 1        |   |   |   | 1 | 1 |   |   |                |        | P          |            |
| <i>Rumex lunaria</i> L.                                         | Polygonaceae    | Acc      | Acc  | Acc  | Acc  | Acc | Acc  | Acc | 6        | 1 | 1 | 1 | 1 | 1 | 1 | 1 | A              | S      |            |            |
| <i>Rumex maderensis</i> Lowe                                    | Polygonaceae    | Acc      | Acc  | Acc  | Acc  | Acc | Acc  | Acc | 1        | 1 | 1 | 1 | 1 | 1 |   |   |                | S      |            |            |
| <i>Rumex obtusifolius</i> L. subsp. <i>obtusifolius</i>         | Polygonaceae    | Acc      | NL   | Acc  | Syn  | Acc | Acc  | NL  | 2        | 1 | 1 | 1 | 1 | 1 |   |   |                |        | P          |            |
| <i>Rumex palustris</i> Sm.                                      | Polygonaceae    | Acc      | NL   | Acc  | Acc  | Acc | Acc  | Acc | 7        |   |   |   | 1 |   |   |   |                |        | P          |            |
| <i>Rumex pulcher</i> L. subsp. <i>pulcher</i>                   | Polygonaceae    | Acc      | NL   | NL   | Syn  | Acc | Acc  | NL  |          | 1 | 1 | 1 | 1 | 1 |   |   |                |        | P          |            |
| <i>Rumex pulcher</i> L. subsp. <i>woodsii</i> (De Not.) Arcang. | Polygonaceae    | Acc      | Acc  | NL   | Acc  | Acc | Acc  | Acc |          | 1 | 1 | 1 | 1 | 1 |   |   |                |        | P          |            |
| <i>Rumex spinosus</i> L.                                        | Polygonaceae    | Syn      | Syn  | Acc  | Syn  | Acc | Acc  | Syn | 4        | 1 | 1 | 1 | 1 | 1 | 1 | 1 |                | P      |            |            |
| <i>Rumex vesicarius</i> L.                                      | Polygonaceae    | Acc      | Acc  | Acc  | Acc  | Acc | Acc  | Acc | 5        | 1 | 1 | 1 | 1 | 1 | 1 | 1 |                | P      |            |            |
| <i>Ruppia maritima</i> L.                                       | Ruppiaceae      | Acc      | Acc  | Acc  | Acc  | Acc | Acc  | Acc | 36       |   | 1 | 1 | 1 | 1 | 1 | 1 |                | S      |            |            |
| <i>Ruscus aculeatus</i> L.                                      | Asparagaceae    | Acc      | Acc  | Acc  | Acc  | Acc | Acc  | Acc | 6        |   |   |   | 1 |   |   | 1 |                |        | S          |            |
| <i>Ruscus hypoglossum</i> L.                                    | Asparagaceae    | Acc      | Acc  | Acc  | Acc  | Acc | Acc  | Acc | 4        |   |   |   |   | 1 |   |   |                |        | S          |            |
| <i>Russelia equisetiformis</i> Schltldl. & Cham.                | Plantaginaceae  | NL       | NL   | Acc  | Acc  | Acc | Acc  | Acc | 1        |   | 1 |   | 1 | 1 |   |   |                |        | S          | O          |
| <i>Ruta chalepensis</i> L.                                      | Rutaceae        | Acc      | Acc  | Acc  | Acc  | Acc | Acc  | Acc | 6        | 1 | 1 | 1 | 1 | 1 | 1 | 1 |                |        | P          |            |
| <i>Ruta graveolens</i> L.                                       | Rutaceae        | Acc      | Acc  | Acc  | Acc  | Acc | Acc  | Acc | 11       |   |   |   |   | 1 |   |   |                |        | S          | C          |
| <i>Ruta microcarpa</i> Svent.                                   | Rutaceae        | Acc      | Acc  | Acc  | AmUn | Acc | Acc  | Acc | 0        |   |   | 1 |   |   |   |   | G              | S      |            |            |
| <i>Ruta oreojasme</i> Webb & Berthel.                           | Rutaceae        | Acc      | Acc  | Acc  | AmUn | Acc | Acc  | Acc | 0        |   |   |   |   | 1 |   |   | C              | S      |            |            |
| <i>Ruta pinnata</i> L.f.                                        | Rutaceae        | Acc      | Acc  | Acc  | AmUn | Acc | Acc  | Acc | 1        |   | 1 |   | 1 |   |   |   | A              | S      |            |            |
| <i>Rutheopsis herbanica</i> (Bolle) A.Hansen & G.Kunkel         | Apiaceae        | Acc      | Acc  | Acc  | AmUn | Acc | Acc  | NL  | 2        |   |   |   |   |   | 1 | 1 | A              | S      |            |            |
| <i>Sabulina mediterranea</i> (Ledeb. ex Link) Rchb.             | Caryophyllaceae | Syn      | Syn  | Acc  | AmUn | Syn | Acc  | Syn | 14       |   |   | 1 |   |   |   |   |                |        | S          |            |
| <i>Saccharum officinarum</i> L.                                 | Poaceae         | Acc      | Acc  | Acc  | Acc  | Acc | Acc  | Acc | 11       |   |   |   | 1 | 1 |   |   |                |        | S          | C          |

| Species Name                                                                                                      | Family          | Atlantis | Muer | POWO | WFO | COL | GBIF | TRY | POWO Syn | H | P | G | T | C | F | L | Endemic Status | Native | Non native | Ornam Crop |
|-------------------------------------------------------------------------------------------------------------------|-----------------|----------|------|------|-----|-----|------|-----|----------|---|---|---|---|---|---|---|----------------|--------|------------|------------|
| <i>Sagina apetala</i> Ard.                                                                                        | Caryophyllaceae | Acc      | Acc  | Acc  | Acc | Acc | Acc  | Acc | 37       | 1 | 1 | 1 | 1 | 1 | 1 | 1 |                | P      |            |            |
| <i>Sagina maritima</i> G.Don                                                                                      | Caryophyllaceae | Acc      | Acc  | Acc  | Acc | Acc | Acc  | Acc | 16       |   |   |   | 1 |   |   |   |                | P      |            |            |
| <i>Sagina procumbens</i> L.                                                                                       | Caryophyllaceae | Acc      | Acc  | Acc  | Acc | Acc | Acc  | Acc | 18       | 1 | 1 |   | 1 | 1 |   |   |                | P      |            |            |
| <i>Salicornia perennis</i> Mill.                                                                                  | Amaranthaceae   | Syn      | Syn  | Acc  | Syn | Acc | Acc  | Syn | 12       |   |   |   |   | 1 | 1 | 1 |                | S      |            |            |
| <i>Salix fragilis</i> L.                                                                                          | Salicaceae      | NL       | Acc  | Acc  | Syn | Acc | Acc  | Acc | 33       | 1 |   | 1 | 1 | 1 |   |   |                |        | S          | O          |
| <i>Salix pedicellata</i> (C.Sm. ex Link) A.K.Skvortsov<br>subsp. <i>canariensis</i> (C.Sm. ex Link) A.K.Skvortsov | Salicaceae      | Syn      | Syn  | Acc  | Acc | Syn | Syn  | Acc | 1        | 1 | 1 | 1 | 1 | 1 |   |   | A              | S      |            |            |
| <i>Salpichroa organifolia</i> (Lam.) Baill.                                                                       | Solanaceae      | Acc      | Acc  | Acc  | Acc | Acc | Acc  | Acc | 13       |   |   |   | 1 | 1 | 1 |   |                |        | S          |            |
| <i>Salsola divaricata</i> Masson ex Link                                                                          | Amaranthaceae   | Acc      | Acc  | Acc  | Acc | Syn | Acc  | NL  | 3        |   | 1 | 1 | 1 | 1 | 1 | 1 | A              | S      |            |            |
| <i>Salsola kali</i> L.                                                                                            | Amaranthaceae   | Acc      | Acc  | Acc  | Acc | Syn | Syn  | Acc | 18       |   |   |   | 1 | 1 | 1 |   |                | P      |            |            |
| <i>Salsola longifolia</i> Forssk.                                                                                 | Amaranthaceae   | NL       | NL   | Acc  | Acc | Acc | Acc  | Acc | 8        |   |   |   | 1 |   |   |   |                |        | P          |            |
| <i>Salsola oppositifolia</i> Desf.                                                                                | Amaranthaceae   | NL       | NL   | Acc  | Acc | Acc | Acc  | Acc | 2        |   |   | 1 | 1 |   | 1 | 1 |                | P      |            |            |
| <i>Salvia aegyptiaca</i> L.                                                                                       | Lamiaceae       | Syn      | Acc  | Acc  | Acc | Syn | Acc  | Acc | 7        |   |   | 1 | 1 | 1 | 1 | 1 |                | S      |            |            |
| <i>Salvia africana</i> L.                                                                                         | Lamiaceae       | Acc      | Acc  | Acc  | Syn | Acc | Acc  | Syn | 10       |   | 1 |   |   |   |   |   |                |        | S          |            |
| <i>Salvia broussonetii</i> Benth.                                                                                 | Lamiaceae       | Acc      | Acc  | Acc  | Acc | Acc | Acc  | Acc | 2        |   |   |   | 1 |   |   |   | T              | S      |            |            |
| <i>Salvia canariensis</i> L.                                                                                      | Lamiaceae       | Acc      | Acc  | Acc  | Acc | Acc | Acc  | Acc | 5        | 1 | 1 | 1 | 1 | 1 | 1 | 1 | A              | S      |            |            |
| <i>Salvia coccinea</i> Buc'hoz ex Etl.                                                                            | Lamiaceae       | Acc      | Acc  | Acc  | Acc | Acc | Acc  | Acc | 12       |   | 1 | 1 | 1 | 1 |   | 1 |                |        | S          |            |
| <i>Salvia fruticosa</i> Mill.                                                                                     | Lamiaceae       | Acc      | Acc  | Acc  | Acc | Acc | Acc  | Acc | 15       | 1 |   |   | 1 |   |   |   |                |        | S          |            |
| <i>Salvia herbanica</i> A.Santos & M.Fernandez                                                                    | Lamiaceae       | Syn      | Acc  | Acc  | Acc | Acc | Syn  | NL  | 1        |   |   |   |   |   | 1 |   | F              | S      |            |            |
| <i>Salvia hispanica</i> L.                                                                                        | Lamiaceae       | NL       | NL   | Acc  | Acc | Acc | Acc  | Acc | 5        |   |   |   |   | 1 |   |   |                |        | S          |            |
| <i>Salvia leucantha</i> Cav.                                                                                      | Lamiaceae       | Acc      | Acc  | Acc  | Acc | Acc | Acc  | Acc | 0        | 1 | 1 | 1 | 1 | 1 |   |   |                |        | S          | O          |
| <i>Salvia microphylla</i> Kunth                                                                                   | Lamiaceae       | NL       | Acc  | Acc  | Acc | Acc | Acc  | Acc | 0        |   |   |   |   | 1 |   |   |                |        | S          |            |
| <i>Salvia officinalis</i> L.                                                                                      | Lamiaceae       | Acc      | Acc  | Acc  | Acc | Acc | Acc  | Acc | 0        |   |   |   | 1 |   |   |   |                |        | S          | C          |
| <i>Salvia rosmarinus</i> Schleid.                                                                                 | Lamiaceae       | Acc      | Syn  | Acc  | Syn | Acc | Acc  | Syn | 19       | 1 | 1 | 1 | 1 | 1 |   |   |                |        | S          | C          |
| <i>Salvia verbenaca</i> L.                                                                                        | Lamiaceae       | Acc      | Acc  | Acc  | Acc | Acc | Acc  | Acc | 81       | 1 | 1 | 1 | 1 | 1 | 1 | 1 |                |        | P          | C          |



| Species Name                                                  | Family         | Atlantis | Muer | POWO | WFO  | COL  | GBIF | TRY | POWO Syn | H | P | G | T | C | F | L | Endemic Status | Native | Non native | Ornam Crop |
|---------------------------------------------------------------|----------------|----------|------|------|------|------|------|-----|----------|---|---|---|---|---|---|---|----------------|--------|------------|------------|
| <i>Salvinia molesta</i> D.S. Mitch                            | Salviniaceae   | Acc      | NL   | Acc  | Syn  | Acc  | Acc  | Syn | 1        |   |   |   |   | 1 |   |   |                |        | I          | O          |
| <i>Salvinia natans</i> (L.) All.                              | Salviniaceae   | Acc      | Acc  | Acc  | Acc  | Acc  | Acc  | Acc | 8        |   |   |   | 1 | 1 |   |   |                |        | S          | O          |
| <i>Sambucus canadensis</i> L.                                 | Adoxaceae      | Acc      | Acc  | Acc  | Acc  | Acc  | Acc  | Acc | 30       |   |   |   |   | 1 |   |   |                |        | S          | O          |
| <i>Sambucus palmensis</i> Link                                | Adoxaceae      | Syn      | Acc  | Acc  | Acc  | Acc  | Acc  | Acc | 1        |   | 1 | 1 | 1 | 1 |   |   | A              | S      |            |            |
| <i>Samolus valerandi</i> L.                                   | Primulaceae    | Acc      | Acc  | Acc  | Acc  | Acc  | Acc  | Acc | 12       |   | 1 | 1 | 1 | 1 | 1 | 1 |                | P      |            |            |
| <i>Sanguisorba megacarpa</i> (Lowe) Munoz Garm. & C.Navarro   | Rosaceae       | Acc      | Syn  | Acc  | AmUn | Syn  | Syn  | NL  | 1        | 1 | 1 | 1 | 1 | 1 | 1 |   |                | S      |            |            |
| <i>Sanguisorba menendezii</i> Svent.                          | Rosaceae       | Syn      | Syn  | Acc  | AmUn | Syn  | Syn  | Acc | 2        |   |   |   |   | 1 |   |   | C              | S      |            |            |
| <i>Saxifraga stolonifera</i> Curtis                           | Saxifragaceae  | Acc      | Acc  | Acc  | Acc  | Acc  | Acc  | Acc | 19       |   |   |   |   | 1 |   |   |                |        | S          |            |
| <i>Scabiosa atropurpurea</i> L.                               | Caprifoliaceae | Acc      | Acc  | Acc  | Acc  | Syn  | Syn  | Acc | 11       | 1 | 1 | 1 | 1 | 1 |   |   |                |        | P          |            |
| <i>Scandix brachycarpa</i> Guss.                              | Apiaceae       | Syn      | Acc  | Syn  | Acc  | Acc  | Acc  | Syn |          |   |   |   | 1 |   |   |   |                |        | P          |            |
| <i>Scandix pecten-veneris</i> L. subsp. <i>pecten-veneris</i> | Apiaceae       | Acc      | NL   | NL   | NL   | AmUn | Acc  | Acc |          | 1 | 1 | 1 | 1 | 1 | 1 | 1 |                | P      |            |            |
| <i>Schefflera actinophylla</i> (Endl.) Harms                  | Araliaceae     | Acc      | Acc  | Syn  | Acc  | Acc  | Acc  | Acc |          |   | 1 |   | 1 | 1 |   |   |                |        | S          | O          |
| <i>Schenkia spicata</i> (L.) G.Mans.                          | Gentianaceae   | Syn      | Syn  | Acc  | Acc  | Acc  | Acc  | Acc | 13       |   |   | 1 |   |   |   |   |                |        | P          |            |
| <i>Schinus molle</i> L.                                       | Anacardiaceae  | Acc      | Acc  | Acc  | Acc  | Acc  | Acc  | Acc | 3        |   | 1 | 1 | 1 | 1 | 1 | 1 |                |        | S          | C          |
| <i>Schinus terebinthifolia</i> Raddi                          | Anacardiaceae  | Acc      | Acc  | Acc  | Acc  | Acc  | Acc  | Acc | 16       |   |   |   | 1 | 1 | 1 |   |                |        | S          | C          |
| <i>Schismus arabicus</i> Nees ex Steud.                       | Poaceae        | Acc      | Acc  | Acc  | Acc  | Acc  | Acc  | Acc | 2        |   |   |   | 1 | 1 |   | 1 |                | P      |            |            |
| <i>Schismus barbatus</i> (L.) Thell.                          | Poaceae        | Acc      | Acc  | Acc  | Acc  | Acc  | Acc  | Acc | 22       | 1 | 1 | 1 | 1 | 1 | 1 | 1 |                | P      |            |            |
| <i>Schizogyne glaberrima</i> DC.                              | Asteraceae     | Acc      | Acc  | Acc  | Acc  | Acc  | Acc  | Acc | 0        |   |   |   | 1 | 1 |   |   | A              | S      |            |            |
| <i>Schizogyne sericea</i> (L.f.) DC.                          | Asteraceae     | Acc      | Acc  | Acc  | Acc  | Acc  | Acc  | Acc | 10       | 1 | 1 | 1 | 1 | 1 |   | 1 |                | S      |            |            |
| <i>Schoenoplectiella supina</i> (L.) Lye                      | Cyperaceae     | Syn      | Acc  | Acc  | Acc  | Acc  | Acc  | Acc | 18       |   |   |   |   | 1 |   |   |                | P      |            |            |
| <i>Schoenoplectus triquetus</i> (L.) Palla in Verh            | Cyperaceae     | Acc      | NL   | Acc  | Acc  | Acc  | Acc  | Acc | 22       |   |   |   |   |   |   |   |                | P      |            |            |
| <i>Scilla haemorrhoidalis</i> Webb & Berthel.                 | Asparagaceae   | Acc      | Syn  | Acc  | Acc  | Acc  | Acc  | Acc | 3        |   | 1 | 1 | 1 | 1 | 1 | 1 | A              | S      |            |            |
| <i>Scilla latifolia</i> Willd. ex Schult. & Schult.f.         | Asparagaceae   | Acc      | Acc  | Acc  | Acc  | Acc  | Acc  | Acc | 3        | 1 | 1 | 1 | 1 |   | 1 | 1 |                | S      |            |            |
| <i>Scilla peruviana</i> L.                                    | Asparagaceae   | Acc      | Acc  | Acc  | Acc  | Acc  | Acc  | Acc | 41       |   |   |   | 1 |   |   |   |                |        | S          |            |

| Species Name                                                                   | Family           | Atlantis | Muer | POWO | WFO  | COL  | GBIF | TRY | POWO Syn | H | P | G | T | C | F | L | Endemic Status | Native | Non native | Ornam Crop |
|--------------------------------------------------------------------------------|------------------|----------|------|------|------|------|------|-----|----------|---|---|---|---|---|---|---|----------------|--------|------------|------------|
| <i>Scirpoides holoschoenus</i> (L.) Soják                                      | Cyperaceae       | Acc      | Acc  | Acc  | Acc  | Acc  | Acc  | Acc | 5        |   | 1 | 1 | 1 | 1 |   |   |                |        | P          |            |
| <i>Scleranthus annuus</i> L. subsp. <i>annuus</i>                              | Caryophyllaceae  | Acc      | NL   | NL   | Syn  | AmUn | Acc  | NL  |          |   |   |   | 1 | 1 |   |   |                | P      |            |            |
| <i>Scleranthus annuus</i> L. subsp. <i>polycarpus</i> (L.)<br>Bonnier & Layens | Caryophyllaceae  | Acc      | Syn  | NL   | Acc  | Acc  | Acc  | Acc |          |   |   |   | 1 |   |   |   |                | P      |            |            |
| <i>Sclerophylax spinescens</i> Miers                                           | Solanaceae       | Acc      | Acc  | Acc  | Acc  | Acc  | Acc  | Acc | 1        |   |   |   | 1 | 1 | 1 |   |                |        | S          |            |
| <i>Scolymus grandiflorus</i> Desf.                                             | Asteraceae       | Acc      | Acc  | Acc  | Acc  | Acc  | Acc  | Acc | 2        |   |   |   | 1 |   |   |   |                | P      |            |            |
| <i>Scolymus hispanicus</i> L. subsp. <i>hispanicus</i>                         | Asteraceae       | Acc      | Acc  | Acc  | Syn  | Acc  | Acc  | NL  | 8        | 1 |   | 1 | 1 | 1 |   |   |                | P      |            |            |
| <i>Scolymus hispanicus</i> L. subsp. <i>occidentalis</i> L.<br>F.M.Vázquez     | Asteraceae       | Acc      | Acc  | Acc  | NL   | Acc  | Acc  | NL  | 0        | 1 |   | 1 | 1 | 1 |   |   |                | P      |            |            |
| <i>Scolymus maculatus</i> L.                                                   | Asteraceae       | Acc      | Acc  | Acc  | Acc  | Acc  | Acc  | Acc | 4        | 1 | 1 | 1 | 1 | 1 | 1 | 1 |                | P      |            |            |
| <i>Scorpiurus muricatus</i> L.                                                 | Fabaceae         | Acc      | Acc  | Acc  | Acc  | Acc  | Acc  | Acc | 13       | 1 | 1 | 1 | 1 | 1 | 1 | 1 |                |        | S          |            |
| <i>Scorpiurus vermiculatus</i> L.                                              | Fabaceae         | Acc      | Acc  | Acc  | Acc  | Acc  | Acc  | Acc | 3        |   | 1 |   | 1 | 1 |   |   |                |        | S          |            |
| <i>Scorzonera laciniata</i> L.                                                 | Asteraceae       | Syn      | Acc  | Acc  | Syn  | Acc  | Acc  | Acc | 2        |   |   |   | 1 | 1 | 1 | 1 |                |        | P          |            |
| <i>Scorzoneroideis palisiae</i> (Izuzq.) Greuter & Talavera                    | Asteraceae       | Acc      | Acc  | Acc  | Acc  | Acc  | Acc  | NL  | 1        |   |   |   | 1 |   |   |   |                | P      |            |            |
| <i>Scrophularia arguta</i> Aiton                                               | Scrophulariaceae | Acc      | Acc  | Acc  | Acc  | Acc  | Acc  | Acc | 3        | 1 | 1 | 1 | 1 | 1 | 1 | 1 |                | S      |            |            |
| <i>Scrophularia auriculata</i> L.                                              | Scrophulariaceae | Acc      | Acc  | Acc  | Acc  | Acc  | Acc  | Acc | 9        |   |   |   |   | 1 |   |   |                |        | S          |            |
| <i>Scrophularia calliantha</i> Webb & Berthel.                                 | Scrophulariaceae | Acc      | Acc  | Acc  | AmUn | Acc  | Acc  | Acc | 0        |   |   |   |   | 1 |   |   | C              | S      |            |            |
| <i>Scrophularia glabrata</i> Aiton                                             | Scrophulariaceae | Acc      | Acc  | Acc  | AmUn | Acc  | Acc  | Acc | 1        |   | 1 |   | 1 |   |   |   | A              | S      |            |            |
| <i>Scrophularia parviflora</i> Wooton & Standl.                                | Scrophulariaceae | NL       | NL   | Acc  | Acc  | Acc  | Acc  | Acc | 2        |   | 1 |   | 1 |   |   |   | A              | S      |            |            |
| <i>Scrophularia scorodonia</i> L.                                              | Scrophulariaceae | Acc      | Acc  | Acc  | Acc  | Acc  | Acc  | Acc | 13       |   |   |   | 1 |   |   |   |                |        | S          |            |
| <i>Scrophularia smithii</i> Hornem subsp. <i>smithii</i> (Bolle)<br>V.Dalgaard | Scrophulariaceae | Acc      | Acc  | NL   | NL   | Acc  | Acc  | NL  |          |   |   |   | 1 |   |   |   | T              | S      |            |            |
| <i>Scrophularia smithii</i> Hornem subsp. <i>hierrensis</i><br>Dalgaard        | Scrophulariaceae | Acc      | Acc  | Acc  | NL   | Acc  | Acc  | NL  | 0        | 1 |   |   |   |   |   |   | H              | S      |            |            |
| <i>Scrophularia smithii</i> Hornem subsp. <i>langeana</i><br>(Bolle) Dalgaard  | Scrophulariaceae | Acc      | Acc  | Acc  | NL   | Acc  | Acc  | NL  | 2        |   | 1 | 1 | 1 | 1 |   |   | A              | S      |            |            |
| <i>Searsia albida</i> (Schousb.) Moffett                                       | Anacardiaceae    | Acc      | Acc  | Acc  | Acc  | Acc  | Acc  | NL  | 1        |   |   |   |   |   | 1 |   |                | P      |            |            |

| Species Name                                                                  | Family          | Atlantis | Muer | POWO | WFO  | COL | GBIF | TRY | POWO Syn | H | P | G | T | C | F | L | Endemic Status | Native | Non native | Ornam Crop |
|-------------------------------------------------------------------------------|-----------------|----------|------|------|------|-----|------|-----|----------|---|---|---|---|---|---|---|----------------|--------|------------|------------|
| <i>Secale cereale</i> L.                                                      | Poaceae         | Acc      | Acc  | Acc  | Acc  | Acc | Acc  | Acc | 19       | 1 | 1 |   | 1 | 1 |   | 1 |                |        | P          | C          |
| <i>Sedum dendroideum</i> Moc. & Sessé ex D.C.                                 | Crassulaceae    | Acc      | NL   | Acc  | Acc  | Acc | Acc  | Acc | 0        |   | 1 | 1 | 1 | 1 |   |   |                |        | S          |            |
| <i>Sedum lancerottense</i> R.P. Murray                                        | Crassulaceae    | Syn      | Acc  | Acc  | AmUn | Acc | Acc  | Syn | 1        |   |   |   |   |   |   | 1 | L              | S      |            |            |
| <i>Sedum mexicanum</i> Britton                                                | Crassulaceae    | Acc      | Acc  | Acc  | Acc  | Acc | Acc  | Acc | 0        |   |   |   | 1 |   |   |   |                |        | S          |            |
| <i>Sedum nudum</i> Aiton                                                      | Crassulaceae    | Acc      | NL   | Acc  | Acc  | Acc | Acc  | Acc | 0        |   |   |   |   |   |   | 1 |                | S      |            |            |
| <i>Sedum rubens</i> L.                                                        | Crassulaceae    | Acc      | Acc  | Acc  | Acc  | Acc | Acc  | Acc | 9        | 1 | 1 | 1 | 1 | 1 |   | 1 |                | P      |            |            |
| <i>Selaginella denticulata</i> (L.) Spring                                    | Selaginellaceae | Acc      | Acc  | Acc  | Syn  | Acc | Acc  | NL  | 2        | 1 | 1 | 1 | 1 | 1 |   |   |                |        | S          |            |
| <i>Selaginella kraussiana</i> (Kunze) A.Braun                                 | Selaginellaceae | Acc      | Acc  | Acc  | Acc  | Acc | Acc  | Acc | 2        | 1 |   |   | 1 | 1 |   |   |                | S      |            |            |
| <i>Selaginella selaginoides</i> (L.) P. Beauv. ex Schrank & Mart.             | Selaginellaceae | Acc      | Acc  | Acc  | Acc  | Syn | Acc  | Acc | 5        | 1 |   |   |   |   |   |   |                |        | S          |            |
| <i>Selenicereus triangularis</i> (L.) D.R.Hunt                                | Cactaceae       | NL       | NL   | Acc  | Acc  | Acc | Acc  | NL  | 23       |   |   |   | 1 |   |   |   |                |        | S          | O          |
| <i>Selenicereus undatus</i> (Haw.) D.R.Hunt                                   | Cactaceae       | Syn      | Syn  | Acc  | Syn  | Acc | Syn  | Syn | 7        |   | 1 | 1 | 1 | 1 | 1 |   |                |        | S          | O          |
| <i>Semele androgyna</i> (L.) Kunth                                            | Asparagaceae    | Acc      | Acc  | Acc  | Acc  | Acc | Acc  | Acc | 3        | 1 | 1 | 1 | 1 | 1 |   |   |                | S      |            |            |
| <i>Semele gayae</i> (Webb & Berthel.) Svent. & Kunkel                         | Asparagaceae    | Acc      | Acc  | Acc  | Acc  | Acc | Acc  | NL  | 1        |   |   |   |   | 1 |   |   | C              | S      |            |            |
| <i>Senecio angulatus</i> L.f.                                                 | Asteraceae      | Acc      | Acc  | Acc  | Acc  | Acc | Acc  | Acc | 4        | 1 | 1 |   | 1 | 1 |   |   |                |        | S          | O          |
| <i>Senecio bollei</i> Sundig & G.Kunkel                                       | Asteraceae      | Acc      | Acc  | Acc  | Acc  | Acc | Acc  | Acc | 1        |   |   |   |   |   | 1 |   | F              | S      |            |            |
| <i>Senecio flavus</i> (Decne) Sch.Bip.                                        | Asteraceae      | Acc      | Acc  | Acc  | Acc  | Acc | Acc  | Acc | 4        |   |   |   | 1 | 1 | 1 | 1 |                | P      |            |            |
| <i>Senecio glaucus</i> L. subsp. <i>coronopifolius</i> (Maire) C.Alexander    | Asteraceae      | Acc      | Acc  | Acc  | AmUn | Acc | Acc  | Acc | 8        | 1 |   | 1 | 1 | 1 | 1 | 1 |                | P      |            |            |
| <i>Senecio ilsae</i> A.Santos & Reyes-Bet.                                    | Asteraceae      | Acc      | Acc  | Acc  | NL   | Acc | Acc  | NL  | 2        |   |   | 1 |   |   |   |   | G              | S      |            |            |
| <i>Senecio incrassatus</i> Lowe                                               | Asteraceae      | Acc      | Acc  | Acc  | Acc  | Acc | Acc  | NL  | 0        | 1 | 1 |   |   |   |   |   |                | S      |            |            |
| <i>Senecio leucanthemifolius</i> Poir. var. <i>leucanthemifolius</i>          | Asteraceae      | NL       | Acc  | NL   | Syn  | Acc | Acc  | NL  |          |   |   | 1 | 1 | 1 | 1 | 1 |                | P      |            |            |
| <i>Senecio leucanthemifolius</i> Poir. var. <i>falcifolius</i> (Bolle) Kunkel | Asteraceae      | NL       | Acc  | Acc  | Acc  | Acc | Acc  | NL  | 0        |   |   |   |   |   | 1 | 1 | A              | S      |            |            |
| <i>Senecio massaicus</i> (Maire) Maire                                        | Asteraceae      | Acc      | Acc  | Acc  | Acc  | Acc | Acc  | Acc | 1        |   |   |   | 1 | 1 | 1 | 1 |                | P      |            |            |

| Species Name                                                                                                | Family        | Atlantis | Muer | POWO | WFO | COL | GBIF | TRY | POWO Syn | H | P | G | T | C | F | L | Endemic Status | Native | Non native | Ornam Crop |
|-------------------------------------------------------------------------------------------------------------|---------------|----------|------|------|-----|-----|------|-----|----------|---|---|---|---|---|---|---|----------------|--------|------------|------------|
| <i>Senecio teneriffae</i> Sch. Bip.                                                                         | Asteraceae    | Acc      | Acc  | Acc  | Acc | Acc | Acc  | Acc | 0        | 1 | 1 | 1 | 1 | 1 |   |   |                | S      |            |            |
| <i>Senecio vulgaris</i> L.                                                                                  | Asteraceae    | Acc      | Acc  | Acc  | Acc | Acc | Acc  | Acc | 1        | 1 | 1 | 1 | 1 | 1 | 1 | 1 |                | P      |            |            |
| <i>Senna bicapsularis</i> (L.) Roxb.                                                                        | Fabaceae      | Acc      | Acc  | Acc  | Acc | Acc | Acc  | Acc | 4        | 1 | 1 | 1 | 1 | 1 | 1 |   |                |        | S          | O          |
| <i>Senna corymbosa</i> (Lam.) H.S.Irwin & Barneby                                                           | Fabaceae      | Acc      | Acc  | Acc  | Acc | Acc | Acc  | Acc | 6        |   |   |   |   | 1 |   |   |                |        | S          | O          |
| <i>Senna didymobotrya</i> (Fresen.) H.S.Irwin & Barneby                                                     | Fabaceae      | Acc      | Acc  | Acc  | Acc | Acc | Acc  | Acc | 5        |   |   |   | 1 | 1 | 1 |   |                |        | S          | O          |
| <i>Senna multiglandulosa</i> (Jacq.) H.S.Irwin & Barneby                                                    | Fabaceae      | Acc      | Acc  | Acc  | Acc | Acc | Acc  | Acc | 8        |   |   |   |   |   | 1 |   |                |        | S          | O          |
| <i>Senna occidentalis</i> (L.) Link                                                                         | Fabaceae      | Acc      | Acc  | Acc  | Acc | Acc | Acc  | Acc | 18       |   |   |   |   | 1 |   |   |                |        | S          | O          |
| <i>Senna spectabilis</i> (DC.) H.S.Irwin & Barneby                                                          | Fabaceae      | NL       | Acc  | Acc  | Acc | Acc | Acc  | Acc | 2        |   |   |   |   | 1 |   |   |                |        | S          | O          |
| <i>Serapias parviflora</i> Parl. subsp. <i>mascaensis</i><br>(H.Kretzschmar, G.Kretzschmar & Kreutz) Kreutz | Orchidaceae   | Syn      | Syn  | Syn  | Syn | Syn | Syn  | NL  | 2        |   |   |   | 1 |   |   |   | T              | S      |            |            |
| <i>Sesleria albicans</i> Kit.                                                                               | Poaceae       | Syn      | Syn  | Acc  | Acc | Acc | Acc  | Acc | 13       |   | 1 |   |   |   |   |   |                | P      |            |            |
| <i>Sesuvium portulacastrum</i> (L.) L. subsp. <i>portulacastrum</i>                                         | Aizoaceae     | Acc      | NL   | NL   | NL  | Acc | Acc  | NL  |          |   |   |   |   | 1 | 1 | 1 |                |        | I          | O          |
| <i>Sesuvium verrucosum</i> Raf.                                                                             | Aizoaceae     | Acc      | NL   | Acc  | Acc | Acc | Acc  | Acc | 2        |   |   |   |   | 1 |   |   |                |        | S          | O          |
| <i>Setaria geminata</i> (Forssk.) Veldkamp                                                                  | Poaceae       | Syn      | Syn  | Acc  | Syn | Acc | Acc  | NL  | 24       |   |   |   |   | 1 |   |   |                |        | P          |            |
| <i>Setaria italica</i> (L.) P.Beauv.                                                                        | Poaceae       | Acc      | NL   | Acc  | Acc | Acc | Acc  | Acc | 70       |   |   |   |   | 1 |   |   |                |        | P          |            |
| <i>Setaria megaphylla</i> (Steud.) T. Durant & Schinz                                                       | Poaceae       | Acc      | Acc  | Acc  | Acc | Acc | Acc  | Acc | 16       |   | 1 |   | 1 |   |   |   |                |        | S          |            |
| <i>Setaria parviflora</i> (Poir.) M. Kerguelen                                                              | Poaceae       | Acc      | Acc  | Acc  | Acc | Acc | Acc  | Acc | 107      |   | 1 | 1 | 1 | 1 |   |   |                |        | P          |            |
| <i>Setaria pumila</i> (Poir.) Roem. & Schult.                                                               | Poaceae       | Acc      | Acc  | Acc  | Acc | Syn | Syn  | Acc | 26       |   | 1 | 1 | 1 | 1 | 1 |   |                |        | P          |            |
| <i>Setaria verticillata</i> (L.) P.Beauv.                                                                   | Poaceae       | Syn      | Syn  | Acc  | Acc | Acc | Acc  | Acc | 41       | 1 | 1 | 1 | 1 | 1 | 1 | 1 |                | P      |            |            |
| <i>Setaria viridis</i> (L.) P.Beauv.                                                                        | Poaceae       | Acc      | Acc  | Acc  | Acc | Acc | Acc  | Acc | 54       |   |   |   | 1 | 1 |   |   |                |        | P          |            |
| <i>Sherardia arvensis</i> L.                                                                                | Rubiaceae     | Acc      | Acc  | Acc  | Acc | Acc | Acc  | Acc | 11       | 1 | 1 | 1 | 1 | 1 | 1 | 1 |                | P      |            |            |
| <i>Sicyos edulis</i> Jacq.                                                                                  | Cucurbitaceae | Syn      | Syn  | Acc  | Syn | Syn | Syn  | Syn | 5        |   | 1 |   |   | 1 |   |   |                |        | S          | C          |
| <i>Sida acuta</i> Burm.f.                                                                                   | Malvaceae     | Acc      | Acc  | Acc  | Acc | Acc | Acc  | Acc | 38       |   |   |   | 1 | 1 |   |   |                |        | S          |            |
| <i>Sida rhombifolia</i> L.                                                                                  | Malvaceae     | Acc      | Acc  | Acc  | Acc | Acc | Acc  | Acc | 37       |   | 1 | 1 | 1 | 1 |   |   |                |        | S          |            |

| Species Name                                                              | Family    | Atlantis | Muer | POWO | WFO  | COL  | GBIF | TRY | POWO Syn | H | P | G | T | C | F | L | Endemic Status | Native | Non native | Ornam Crop |
|---------------------------------------------------------------------------|-----------|----------|------|------|------|------|------|-----|----------|---|---|---|---|---|---|---|----------------|--------|------------|------------|
| <i>Sida spinosa</i> L.                                                    | Malvaceae | Acc      | NL   | Acc  | Acc  | Acc  | NL   | Acc | 27       | 1 | 1 |   |   |   |   |   |                |        | S          |            |
| <i>Sidastrum paniculatum</i> (L.) Fryxell                                 | Malvaceae | Acc      | Acc  | Acc  | Acc  | Acc  | Acc  | Acc | 11       |   |   |   | 1 |   |   |   |                |        | S          | O          |
| <i>Sideritis amagroï</i> Marrero Rodr. & B.Navarro                        | Lamiaceae | Acc      | Acc  | Acc  | Acc  | Acc  | Acc  | Acc | 0        |   |   |   |   | 1 |   |   | C              | S      |            |            |
| <i>Sideritis barbellata</i> Mend.-Heuer                                   | Lamiaceae | Acc      | Acc  | Acc  | Acc  | Acc  | Acc  | Acc | 1        |   | 1 |   |   |   |   |   | P              | S      |            |            |
| <i>Sideritis bolleana</i> Bornm.                                          | Lamiaceae | Acc      | NL   | Acc  | Acc  | Acc  | Acc  | Acc | 1        |   | 1 |   |   |   |   |   | P              | S      |            |            |
| <i>Sideritis brevicaulis</i> Mend.-Heuer                                  | Lamiaceae | Acc      | Acc  | Acc  | Acc  | Acc  | Acc  | Acc | 1        |   |   |   | 1 |   |   |   | T              | S      |            |            |
| <i>Sideritis canariensis</i> L.                                           | Lamiaceae | Acc      | Acc  | Acc  | Acc  | Acc  | Acc  | Acc | 3        | 1 | 1 |   | 1 |   |   |   | A              | S      |            |            |
| <i>Sideritis cretica</i> L. subsp. <i>cretica</i>                         | Lamiaceae | NL       | Acc  | Acc  | NL   | Acc  | Acc  | NL  | 2        |   |   |   | 1 |   |   |   | T              | S      |            |            |
| <i>Sideritis cretica</i> L. subsp. <i>spicata</i> (Pit.) Negrin & P.Perez | Lamiaceae | Syn      | Acc  | Acc  | Acc  | Acc  | Acc  | NL  | 1        |   |   | 1 |   |   |   |   | G              | S      |            |            |
| <i>Sideritis cystosiphon</i> Svent.                                       | Lamiaceae | Acc      | Acc  | Acc  | Acc  | Acc  | Acc  | Acc | 1        |   |   |   | 1 |   |   |   | T              | S      |            |            |
| <i>Sideritis dasygnaphala</i> (Webb & Berthel.) Clos                      | Lamiaceae | Acc      | Acc  | Acc  | Acc  | Acc  | Acc  | Acc | 1        |   |   |   |   | 1 |   |   | C              | S      |            |            |
| <i>Sideritis dendrochahorra</i> Bolle                                     | Lamiaceae | Acc      | Acc  | Acc  | Acc  | Acc  | Acc  | Acc | 2        |   |   |   | 1 |   |   |   | T              | S      |            |            |
| <i>Sideritis discolor</i> Willd. ex Bolle                                 | Lamiaceae | Acc      | Acc  | Acc  | Acc  | Acc  | Acc  | Acc | 1        |   |   |   |   | 1 |   |   | C              | S      |            |            |
| <i>Sideritis eriocephala</i> Marrero Rodr. ex Negrin & P.Pérez            | Lamiaceae | Acc      | Acc  | Acc  | AmUn | Acc  | Acc  | Acc | 1        |   |   |   | 1 |   |   |   | T              | S      |            |            |
| <i>Sideritis ferrensis</i> P.Pérez & Négrin                               | Lamiaceae | Acc      | Acc  | Acc  | Acc  | Acc  | Acc  | Acc | 0        | 1 |   |   |   |   |   |   | H              | S      |            |            |
| <i>Sideritis gomeraea</i> de Noé ex Bolle subsp. <i>gomeraea</i>          | Lamiaceae | Acc      | Acc  | Acc  | NL   | Acc  | Acc  | NL  | 2        |   |   | 1 |   |   |   |   | G              | S      |            |            |
| <i>Sideritis gomeraea</i> de Noé ex Bolle subsp. <i>perezii</i> Negrin.   | Lamiaceae | Acc      | Acc  | Acc  | NL   | AmUn | Acc  | NL  | 0        |   |   | 1 |   |   |   |   | G              | S      |            |            |
| <i>Sideritis guayedrae</i> Marrero Rodr.                                  | Lamiaceae | Acc      | Acc  | Acc  | Acc  | Acc  | Acc  | NL  | 0        |   |   |   |   | 1 |   |   | C              | S      |            |            |
| <i>Sideritis infernalis</i> Bolle                                         | Lamiaceae | Acc      | Acc  | Acc  | Acc  | Acc  | Acc  | Acc | 1        |   |   |   | 1 |   |   |   | T              | S      |            |            |
| <i>Sideritis kuegleriana</i> Bornm.                                       | Lamiaceae | Acc      | Acc  | Acc  | Acc  | Acc  | Acc  | NL  | 1        |   |   |   | 1 |   |   |   | T              | S      |            |            |
| <i>Sideritis lotsyi</i> (Pit.) Ceballos & Ortuño subsp. <i>lotsyi</i>     | Lamiaceae | Syn      | Syn  | NL   | NL   | AmUn | Syn  | NL  |          |   |   |   | 1 |   |   |   | T              | S      |            |            |
| <i>Sideritis macrostachyos</i> Poir.                                      | Lamiaceae | Acc      | Acc  | Acc  | Acc  | AmUn | Acc  | NL  | 1        |   |   |   | 1 |   |   |   | T              | S      |            |            |

| Species Name                                                                                   | Family          | Atlantis | Muer | POWO | WFO  | COL  | GBIF | TRY | POWO Syn | H | P | G | T | C | F | L | Endemic Status | Native | Non native | Ornam Crop |
|------------------------------------------------------------------------------------------------|-----------------|----------|------|------|------|------|------|-----|----------|---|---|---|---|---|---|---|----------------|--------|------------|------------|
| <i>Sideritis marmorea</i> Bolle                                                                | Lamiaceae       | Acc      | Acc  | Acc  | Acc  | Acc  | Acc  | Acc | 1        |   |   | 1 |   |   |   |   | G              | S      |            |            |
| <i>Sideritis mascaensis</i> (Svent.) Marrero Rodr.                                             | Lamiaceae       | Acc      | Acc  | Acc  | Syn  | NL   | Acc  | NL  | 2        |   |   |   | 1 |   |   |   | T              | S      |            |            |
| <i>Sideritis nervosa</i> (Christ) Linding.                                                     | Lamiaceae       | Acc      | Acc  | Acc  | Acc  | Acc  | NL   | Acc | 2        |   |   |   | 1 |   |   |   | T              | S      |            |            |
| <i>Sideritis nutans</i> Svent.                                                                 | Lamiaceae       | Acc      | Acc  | Acc  | Acc  | Acc  | Acc  | Acc | 1        |   |   | 1 |   |   |   |   | G              | S      |            |            |
| <i>Sideritis oroteneriffae</i> Négrin & P.Pérez var. <i>oroteneriffae</i>                      | Lamiaceae       | NL       | Acc  | NL   | Syn  | AmUn | Syn  | NL  |          |   |   |   | 1 |   |   |   | T              | S      |            |            |
| <i>Sideritis pumila</i> (Christ) Mendoza-Heuer                                                 | Lamiaceae       | Acc      | Acc  | Acc  | Acc  | Acc  | Acc  | Acc | 1        |   |   |   |   |   | 1 | 1 | A              | S      |            |            |
| <i>Sideritis santosii</i> Marrero Rodr.                                                        | Lamiaceae       | Acc      | Acc  | Acc  | NL   | AmUn | Acc  | NL  | 0        |   |   |   | 1 |   |   |   | T              | S      |            |            |
| <i>Sideritis soluta</i> Clos subsp. <i>soluta</i>                                              | Lamiaceae       | Acc      | Acc  | Acc  | Syn  | Acc  | Acc  | NL  | 5        |   |   |   | 1 |   |   |   | T              | S      |            |            |
| <i>Sideritis soluta</i> Clos M.L.Negrín-Sosa & P.Pérez subsp. <i>gueimaris</i> Negrín & Pérez. | Lamiaceae       | Acc      | Acc  | Acc  | NL   | Acc  | Acc  | NL  | 0        |   |   |   | 1 |   |   |   | T              | S      |            |            |
| <i>Sideritis soluta</i> Clos subsp. <i>hildae</i> Marrero Rodr.                                | Lamiaceae       | Acc      | Acc  | Acc  | NL   | AmUn | Acc  | NL  | 0        |   |   |   | 1 |   |   |   | T              | S      |            |            |
| <i>Sideritis sventenii</i> (G.Kunkel) Mend.-Heuer                                              | Lamiaceae       | Acc      | Acc  | Acc  | Acc  | Acc  | Acc  | Acc | 1        |   |   |   |   | 1 |   |   | C              | S      |            |            |
| <i>Sideroxylon canariense</i> Leyens, Lobin & A.Santos                                         | Sapotaceae      | Acc      | Acc  | Acc  | Acc  | Acc  | Acc  | Acc | 0        | 1 | 1 | 1 | 1 | 1 | 1 |   | A              | S      |            |            |
| <i>Sigesbeckia orientalis</i> L.                                                               | Asteraceae      | Acc      | Acc  | Acc  | Acc  | Acc  | Acc  | Acc | 13       |   | 1 |   | 1 |   |   |   |                |        | S          |            |
| <i>Silene apetala</i> Willd.                                                                   | Caryophyllaceae | Acc      | Acc  | Acc  | Acc  | Acc  | Acc  | Acc | 20       | 1 | 1 | 1 | 1 | 1 | 1 | 1 |                | P      |            |            |
| <i>Silene behen</i> L.                                                                         | Caryophyllaceae | Acc      | Acc  | Acc  | Acc  | Acc  | Acc  | Acc | 8        |   |   |   | 1 | 1 | 1 | 1 |                | P      |            |            |
| <i>Silene bellidifolia</i> Juss. ex Jacq.                                                      | Caryophyllaceae | NL       | NL   | Acc  | Acc  | Acc  | Acc  | Acc | 12       |   |   |   | 1 |   |   | 1 |                | P      |            |            |
| <i>Silene berthelotiana</i> Webb ex Christ                                                     | Caryophyllaceae | Acc      | Acc  | Acc  | AmUn | Acc  | Acc  | Acc | 0        | 1 |   |   | 1 |   |   |   | A              | S      |            |            |
| <i>Silene bourgaei</i> Webb ex Christ                                                          | Caryophyllaceae | Acc      | Acc  | Acc  | AmUn | AmUn | Acc  | Syn | 0        |   |   | 1 |   |   |   |   | G              | S      |            |            |
| <i>Silene canariensis</i> Spreng.                                                              | Caryophyllaceae | Acc      | NL   | Acc  | AmUn | AmUn | Acc  | NL  | 0        |   |   |   | 1 | 1 |   |   | A              | S      |            |            |
| <i>Silene colorata</i> Poir.                                                                   | Caryophyllaceae | Acc      | Acc  | Acc  | Acc  | Acc  | Acc  | Acc | 21       |   |   |   |   |   | 1 | 1 |                | P      |            |            |
| <i>Silene conica</i> L.                                                                        | Caryophyllaceae | Acc      | Acc  | Acc  | Acc  | Acc  | Acc  | Acc | 7        |   |   |   |   | 1 |   |   |                | P      |            |            |
| <i>Silene conoidea</i> L.                                                                      | Caryophyllaceae | Acc      | Acc  | Acc  | Acc  | Acc  | Acc  | Acc | 8        |   |   |   | 1 |   |   |   |                | P      |            |            |
| <i>Silene cretica</i> L.                                                                       | Caryophyllaceae | Acc      | Acc  | Acc  | Acc  | Acc  | Acc  | Acc | 13       |   |   | 1 | 1 | 1 |   |   |                | P      |            |            |

| Species Name                                                                 | Family          | Atlantis | Muer | POWO | WFO  | COL | GBIF | TRY | POWO Syn | H | P | G | T | C | F | L | Endemic Status | Native | Non native | Ornam Crop |
|------------------------------------------------------------------------------|-----------------|----------|------|------|------|-----|------|-----|----------|---|---|---|---|---|---|---|----------------|--------|------------|------------|
| <i>Silene diversifolia</i> Otth                                              | Caryophyllaceae | NL       | Syn  | Acc  | Acc  | Syn | Syn  | Acc | 2        |   |   |   |   |   |   | 1 |                | P      |            |            |
| <i>Silene gallica</i> L.                                                     | Caryophyllaceae | Acc      | Acc  | Acc  | Acc  | Acc | Acc  | Acc | 68       | 1 | 1 | 1 | 1 | 1 | 1 | 1 |                | P      |            |            |
| <i>Silene gracilis</i> DC.                                                   | Caryophyllaceae | Acc      | Acc  | Acc  | AmUn | Acc | Acc  | NL  | 2        |   |   |   |   |   | 1 | 1 |                | P      |            |            |
| <i>Silene inaperta</i> L.                                                    | Caryophyllaceae | Acc      | Acc  | Acc  | Acc  | Acc | Acc  | Acc | 8        |   |   |   | 1 | 1 |   |   |                | P      |            |            |
| <i>Silene lagunensis</i> C.Sm. ex Link                                       | Caryophyllaceae | Acc      | Acc  | Acc  | AmUn | Acc | Acc  | Acc | 0        |   |   |   | 1 |   |   |   | T              | S      |            |            |
| <i>Silene muscipula</i> L.                                                   | Caryophyllaceae | Acc      | Acc  | Acc  | Acc  | Acc | Acc  | Acc | 9        |   |   |   |   |   | 1 |   |                | P      |            |            |
| <i>Silene nocteolens</i> Webb & Berthel.                                     | Caryophyllaceae | Acc      | Acc  | Acc  | AmUn | Acc | Acc  | Syn | 0        |   |   |   | 1 |   |   |   | T              | S      |            |            |
| <i>Silene nocturna</i> L.                                                    | Caryophyllaceae | Acc      | Acc  | Acc  | Acc  | Acc | Acc  | Acc | 18       |   | 1 | 1 | 1 | 1 | 1 | 1 |                | P      |            |            |
| <i>Silene nutans</i> L.                                                      | Caryophyllaceae | Acc      | Acc  | Acc  | Acc  | Acc | Acc  | Acc | 29       | 1 | 1 | 1 | 1 |   |   |   |                | P      |            |            |
| <i>Silene pogonocalyx</i> (Svent.) Bramwell                                  | Caryophyllaceae | Acc      | Acc  | Acc  | AmUn | Acc | Acc  | NL  | 1        | 1 | 1 |   |   |   |   |   | A              | S      |            |            |
| <i>Silene rubella</i> L.                                                     | Caryophyllaceae | Acc      | Syn  | Acc  | Acc  | Acc | Acc  | Acc | 9        |   |   |   |   |   |   | 1 |                | P      |            |            |
| <i>Silene sabinosae</i> Pit.                                                 | Caryophyllaceae | Acc      | Acc  | Acc  | AmUn | Acc | Acc  | NL  | 0        | 1 |   |   |   |   |   |   | H              | S      |            |            |
| <i>Silene tamaranae</i> Bramwell                                             | Caryophyllaceae | Acc      | Acc  | Acc  | AmUn | Acc | Acc  | NL  | 0        |   |   |   |   | 1 |   |   | C              | S      |            |            |
| <i>Silene tridentata</i> Desf.                                               | Caryophyllaceae | Acc      | Acc  | Acc  | Acc  | Acc | Acc  | Acc | 2        |   |   | 1 | 1 | 1 | 1 | 1 |                | P      |            |            |
| <i>Silene vulgaris</i> (Moench) Garcke subsp. <i>vulgaris</i>                | Caryophyllaceae | Acc      | NL   | NL   | Syn  | Acc | Acc  | NL  |          | 1 |   | 1 | 1 |   |   |   |                | P      |            |            |
| <i>Silene vulgaris</i> (Moench) Garcke subsp. <i>commutata</i> (Guss.) Hayek | Caryophyllaceae | Acc      | Syn  | Syn  | Acc  | Syn | Syn  | Acc |          | 1 | 1 | 1 | 1 | 1 | 1 | 1 |                | P      |            |            |
| <i>Silybum marianum</i> (L.) Gaertn.                                         | Asteraceae      | Acc      | Acc  | Acc  | Acc  | Acc | Acc  | Acc | 16       | 1 | 1 | 1 | 1 | 1 | 1 | 1 |                | P      |            |            |
| <i>Simmondsia chinensis</i> (Link) C.K. Schneid.                             | Simmondsiaceae  | Acc      | Acc  | Acc  | Acc  | Acc | Acc  | Acc | 6        |   |   |   |   |   |   | 1 |                |        | S          |            |
| <i>Sinapis alba</i> L.                                                       | Brassicaceae    | Acc      | Acc  | Acc  | Acc  | Acc | Acc  | Acc | 11       | 1 | 1 | 1 | 1 | 1 | 1 | 1 |                | P      |            | C          |
| <i>Sinapis arvensis</i> L.                                                   | Brassicaceae    | Acc      | Acc  | Acc  | Acc  | Acc | Acc  | Acc | 36       | 1 | 1 | 1 | 1 | 1 | 1 | 1 |                | P      |            |            |
| <i>Sinapis flexuosa</i> Poir.                                                | Brassicaceae    | Acc      | Acc  | Acc  | Acc  | Acc | Acc  | Acc | 3        |   |   | 1 | 1 |   | 1 |   |                |        | P          |            |
| <i>Sinapis pubescens</i> L.                                                  | Brassicaceae    | Acc      | NL   | Acc  | Acc  | Acc | Acc  | Acc | 6        | 1 | 1 |   |   |   |   |   |                | P      |            |            |
| <i>Sisymbrium erysimoides</i> Desf.                                          | Brassicaceae    | Acc      | Acc  | Acc  | Acc  | Acc | Acc  | Acc | 10       | 1 | 1 | 1 | 1 | 1 | 1 | 1 |                | P      |            |            |
| <i>Sisymbrium irio</i> L.                                                    | Brassicaceae    | Acc      | Acc  | Acc  | Acc  | Acc | Acc  | Acc | 20       | 1 | 1 | 1 | 1 | 1 | 1 | 1 |                | P      |            |            |

| Species Name                                                | Family       | Atlantis | Muer | POWO | WFO | COL | GBIF | TRY | POWO Syn | H | P | G | T | C | F | L | Endemic Status | Native | Non native | Ornam Crop |
|-------------------------------------------------------------|--------------|----------|------|------|-----|-----|------|-----|----------|---|---|---|---|---|---|---|----------------|--------|------------|------------|
| <i>Sisymbrium officinale</i> (L.) Scop.                     | Brassicaceae | Acc      | Acc  | Acc  | Acc | Acc | Acc  | Acc | 21       | 1 | 1 | 1 | 1 | 1 | 1 | 1 |                |        | P          |            |
| <i>Sisymbrium orientale</i> L.                              | Brassicaceae | Acc      | Acc  | Acc  | Acc | Acc | Acc  | Acc | 21       |   | 1 |   | 1 | 1 |   |   |                |        | P          |            |
| <i>Smilax aspera</i> L.                                     | Smilacaceae  | Acc      | Acc  | Acc  | Acc | Acc | Acc  | Acc | 27       | 1 | 1 | 1 | 1 | 1 | 1 |   |                | S      |            |            |
| <i>Smilax canariensis</i> Willd.                            | Smilacaceae  | Acc      | Acc  | Acc  | Acc | Acc | Acc  | Acc | 2        |   | 1 | 1 | 1 | 1 |   |   |                | S      |            |            |
| <i>Smyrnium olusatrum</i> L.                                | Apiaceae     | Acc      | Acc  | Acc  | Acc | Acc | Acc  | Acc | 2        | 1 |   |   | 1 | 1 |   |   |                |        | S          |            |
| <i>Solanandra grandiflora</i> Sw.                           | Solanaceae   | NL       | Acc  | Acc  | Acc | Acc | Acc  | Acc | 8        |   | 1 | 1 | 1 | 1 | 1 |   |                |        | S          | O          |
| <i>Solanandra maxima</i> (Moc. & Sessé ex Dunal) P.S. Green | Solanaceae   | Acc      | NL   | Acc  | Acc | Acc | Acc  | Acc | 2        |   | 1 | 1 | 1 | 1 | 1 | 1 |                |        | S          | O          |
| <i>Solanum abutiloides</i> (Griseb.) Bitter & Lillo         | Solanaceae   | Acc      | Acc  | Acc  | Acc | Acc | Acc  | Acc | 2        |   | 1 |   | 1 |   |   |   |                |        | S          |            |
| <i>Solanum alatum</i> Moench                                | Solanaceae   | NL       | Acc  | Acc  | Syn | Syn | Acc  | NL  | 6        |   | 1 |   |   |   |   |   |                |        | S          |            |
| <i>Solanum americanum</i> Mill.                             | Solanaceae   | Acc      | Acc  | Acc  | Acc | Acc | Acc  | Acc | 51       |   |   |   |   | 1 |   |   |                |        | S          |            |
| <i>Solanum betaceum</i> Cav.                                | Solanaceae   | NL       | NL   | Acc  | Acc | Acc | Acc  | Acc | 7        |   |   |   | 1 | 1 |   |   |                |        | S          |            |
| <i>Solanum bonariense</i> L.                                | Solanaceae   | Acc      | Acc  | Acc  | Acc | Acc | Acc  | Acc | 10       |   | 1 |   | 1 | 1 |   |   |                |        | S          |            |
| <i>Solanum chenopodioides</i> Lam.                          | Solanaceae   | Acc      | Acc  | Acc  | Acc | Acc | Acc  | Acc | 18       |   | 1 | 1 | 1 | 1 |   |   |                |        | S          |            |
| <i>Solanum chrysotrichum</i> Schltdl.                       | Solanaceae   | Acc      | Acc  | Acc  | Acc | Acc | Acc  | Acc | 5        |   |   |   |   | 1 |   |   |                |        | S          |            |
| <i>Solanum decipiens</i> Opiz                               | Solanaceae   | NL       | NL   | Syn  | Syn | Acc | Acc  | Acc |          |   | 1 |   |   |   |   |   |                |        | S          |            |
| <i>Solanum giganteum</i> Jacq.                              | Solanaceae   | Acc      | Acc  | Acc  | Acc | Acc | Acc  | Acc | 11       |   |   |   |   | 1 |   |   |                |        | S          |            |
| <i>Solanum hoehnei</i> C.V.Morton                           | Solanaceae   | NL       | Syn  | Acc  | Acc | Acc | Acc  | Acc | 3        | 1 |   |   | 1 | 1 |   | 1 |                | P      |            |            |
| <i>Solanum laxum</i> Spreng.                                | Solanaceae   | Acc      | Acc  | Acc  | Acc | Acc | Acc  | Acc | 11       |   |   |   | 1 | 1 |   |   |                |        | S          |            |
| <i>Solanum lidii</i> Sundig                                 | Solanaceae   | Acc      | Acc  | Acc  | Acc | Acc | Acc  | Acc | 0        |   |   |   |   | 1 |   |   | C              | S      |            |            |
| <i>Solanum lycopersicum</i> L.                              | Solanaceae   | Acc      | Acc  | Acc  | Acc | Acc | Acc  | Acc | 65       | 1 | 1 | 1 | 1 | 1 | 1 | 1 |                |        | S          |            |
| <i>Solanum marginatum</i> L.f.                              | Solanaceae   | Acc      | Acc  | Acc  | Acc | Acc | Acc  | Acc | 5        |   |   |   | 1 | 1 |   |   |                |        | S          |            |
| <i>Solanum mauritanium</i> Scop.                            | Solanaceae   | Acc      | Acc  | Acc  | Acc | Acc | Acc  | Acc | 7        |   | 1 |   | 1 |   |   |   |                |        | S          |            |
| <i>Solanum nava</i> Webb & Berthel.                         | Solanaceae   | Syn      | Acc  | Acc  | Acc | Acc | Acc  | Syn | 2        |   |   |   | 1 | 1 |   |   | A              | S      |            |            |
| <i>Solanum nigrum</i> L.                                    | Solanaceae   | Acc      | Acc  | Acc  | Acc | Acc | Acc  | Acc | 58       |   | 1 | 1 | 1 | 1 | 1 | 1 |                | P      |            |            |



| Species Name                                                                                             | Family      | Atlantis | Muer | POWO | WFO | COL  | GBIF | TRY | POWO Syn | H | P | G | T | C | F | L | Endemic Status | Native | Non native | Ornam Crop |
|----------------------------------------------------------------------------------------------------------|-------------|----------|------|------|-----|------|------|-----|----------|---|---|---|---|---|---|---|----------------|--------|------------|------------|
| <i>Solanum pseudocapsicum</i> L.                                                                         | Solanaceae  | Acc      | Acc  | Acc  | Acc | Acc  | Acc  | Acc | 40       | 1 | 1 | 1 | 1 | 1 |   |   |                |        | S          |            |
| <i>Solanum robustum</i> H.L. Wendl.                                                                      | Solanaceae  | Acc      | Acc  | Acc  | Acc | Acc  | Acc  | Acc | 10       |   |   |   | 1 | 1 |   |   |                |        | S          |            |
| <i>Solanum seaforthianum</i> Andrews                                                                     | Solanaceae  | NL       | NL   | Acc  | Acc | Acc  | Acc  | Acc | 9        |   | 1 |   |   | 1 |   |   |                |        | S          |            |
| <i>Solanum tuberosum</i> L.                                                                              | Solanaceae  | Acc      | Acc  | Acc  | Acc | Acc  | Acc  | Acc | 362      |   |   | 1 | 1 | 1 | 1 | 1 |                |        | S          | C          |
| <i>Solanum vespertilio</i> Aiton subsp. <i>vespertilio</i>                                               | Solanaceae  | Acc      | Acc  | Acc  | Acc | Acc  | Acc  | NL  | 3        |   |   |   | 1 |   |   |   | T              | S      |            |            |
| <i>Solanum vespertilio</i> Marrero Rodr. & Gonz.-Mart. subsp. <i>doramae</i> Marrero Rodr. & Gonz.-Mart. | Solanaceae  | Acc      | Acc  | Acc  | Acc | Acc  | Acc  | NL  | 0        |   |   |   |   | 1 |   |   | C              | S      |            |            |
| <i>Solanum villosum</i> Mill. subsp. <i>villosum</i>                                                     | Solanaceae  | Acc      | NL   | NL   | Syn | Acc  | Acc  | Acc |          | 1 | 1 | 1 | 1 | 1 | 1 |   |                | P      |            |            |
| <i>Soleirolia soleirolii</i> (Req.) Dandy                                                                | Urticaceae  | Acc      | Acc  | Acc  | Acc | Acc  | Acc  | Acc | 6        |   |   |   | 1 | 1 |   |   |                |        | S          | O          |
| <i>Solenopsis laurentia</i> (L.) C.Presl                                                                 | Lobeliaceae | Acc      | Acc  | Acc  | Acc | Acc  | Acc  | Acc | 9        |   |   |   | 1 | 1 |   |   |                | P      |            |            |
| <i>Soliva stolonifera</i> (Brot.) R.Br. ex G.Don                                                         | Asteraceae  | Acc      | Acc  | Acc  | Acc | Acc  | Acc  | Acc | 9        | 1 | 1 | 1 | 1 | 1 |   |   |                |        | S          |            |
| <i>Sonchus acaulis</i> Dum.Cours                                                                         | Asteraceae  | Acc      | Acc  | Acc  | Acc | Acc  | Acc  | Acc | 5        |   |   |   | 1 | 1 |   |   | A              | S      |            |            |
| <i>Sonchus arboreus</i> DC.                                                                              | Asteraceae  | Acc      | Acc  | Acc  | Acc | Acc  | Acc  | Acc | 3        |   | 1 |   | 1 |   |   |   | A              | S      |            |            |
| <i>Sonchus asper</i> (L.) Hill subsp. <i>asper</i>                                                       | Asteraceae  | Acc      | NL   | NL   | Syn | AmUn | Acc  | Acc |          |   | 1 | 1 | 1 | 1 |   | 1 |                | P      |            |            |
| <i>Sonchus asper</i> (L.) Hill subsp. <i>glaucescens</i> (Jord.) Ball ex Ball                            | Asteraceae  | Acc      | Syn  | Acc  | Acc | Syn  | Syn  | Acc | 6        |   | 1 | 1 | 1 | 1 |   | 1 |                | P      |            |            |
| <i>Sonchus bornmuelleri</i> Pit.                                                                         | Asteraceae  | Acc      | Acc  | Acc  | Acc | Acc  | Acc  | Acc | 0        |   | 1 |   |   |   |   |   | P              | S      |            |            |
| <i>Sonchus bourgeaui</i> Sch.Bip.                                                                        | Asteraceae  | Acc      | Acc  | Acc  | Acc | Acc  | Acc  | Acc | 1        |   |   |   |   | 1 | 1 | 1 |                | S      |            |            |
| <i>Sonchus brachylobus</i> Webb & Berthel.                                                               | Asteraceae  | Acc      | Acc  | Acc  | Acc | Acc  | Acc  | Acc | 3        |   |   |   |   | 1 |   |   | C              | S      |            |            |
| <i>Sonchus bupleuroides</i> (Font Quer) N.Kilian & Greuter                                               | Asteraceae  | Syn      | Syn  | Acc  | Acc | Acc  | Acc  | Acc | 1        |   |   |   |   | 1 |   |   | C              | S      |            |            |
| <i>Sonchus canariensis</i> (Sch.Bip.) Boulos subsp. <i>canariensis</i>                                   | Asteraceae  | Acc      | Acc  | Acc  | Acc | Acc  | Acc  | NL  | 0        |   |   |   | 1 | 1 |   |   | A              | S      |            |            |
| <i>Sonchus canariensis</i> Boulos subsp. <i>orotavensis</i> Boulos                                       | Asteraceae  | Acc      | Acc  | Acc  | Acc | Acc  | Acc  | NL  | 0        |   |   |   | 1 |   |   |   | T              | S      |            |            |
| <i>Sonchus capillaris</i> Svent.                                                                         | Asteraceae  | Acc      | Acc  | Acc  | Acc | Acc  | Acc  | Acc | 3        |   |   | 1 | 1 | 1 |   |   | A              | S      |            |            |
| <i>Sonchus congestus</i> Willd.                                                                          | Asteraceae  | Acc      | Acc  | Acc  | Acc | Acc  | Acc  | Acc | 9        |   |   |   | 1 | 1 |   |   | A              | S      |            |            |

| Species Name                                                                                    | Family     | Atlantis | Muer | POWO | WFO | COL | GBIF | TRY | POWO Syn | H | P | G | T | C | F | L | Endemic Status | Native | Non native | Ornam Crop |
|-------------------------------------------------------------------------------------------------|------------|----------|------|------|-----|-----|------|-----|----------|---|---|---|---|---|---|---|----------------|--------|------------|------------|
| <i>Sonchus esperanzae</i> N.Kilian & Greuter                                                    | Asteraceae | Syn      | Acc  | Acc  | Acc | Acc | Acc  | NL  | 3        |   | 1 |   |   |   |   |   | P              | S      |            |            |
| <i>Sonchus fauces-orci</i> Knoche                                                               | Asteraceae | Acc      | Acc  | Acc  | Acc | Acc | Acc  | NL  | 0        |   |   |   | 1 |   |   |   | T              | S      |            |            |
| <i>Sonchus gandogerii</i> Pit.                                                                  | Asteraceae | Acc      | Acc  | Acc  | Acc | Acc | Acc  | Acc | 0        | 1 |   |   |   |   |   |   | H              | S      |            |            |
| <i>Sonchus gomeraensis</i> Boulos                                                               | Asteraceae | Acc      | Acc  | Acc  | Acc | Acc | Acc  | Syn | 1        |   |   | 1 |   |   |   |   | G              | S      |            |            |
| <i>Sonchus gummifer</i> Link                                                                    | Asteraceae | Acc      | Acc  | Acc  | Acc | Acc | Acc  | NL  | 1        |   |   |   | 1 |   |   |   | T              | S      |            |            |
| <i>Sonchus hierrensis</i> (Pit.) Boulos                                                         | Asteraceae | Acc      | Acc  | Acc  | Acc | Acc | Acc  | Acc | 1        | 1 | 1 | 1 |   |   |   |   | A              | S      |            |            |
| <i>Sonchus leptcephalus</i> Cass.                                                               | Asteraceae | Acc      | Acc  | Acc  | Acc | Acc | Acc  | Acc | 4        |   |   | 1 | 1 | 1 | 1 |   | A              | S      |            |            |
| <i>Sonchus lidii</i> Boulos                                                                     | Asteraceae | Acc      | Acc  | Acc  | Acc | Acc | Acc  | NL  | 0        | 1 |   |   |   |   |   |   | H              | S      |            |            |
| <i>Sonchus microcarpus</i> (Boulos) U.Reifenb. & A.Reifenb.                                     | Asteraceae | Acc      | Acc  | Acc  | Acc | Acc | Acc  | Acc | 2        |   |   |   | 1 |   |   |   | T              | S      |            |            |
| <i>Sonchus oleraceus</i> (L.) L.                                                                | Asteraceae | Acc      | Acc  | Acc  | Acc | Acc | Acc  | Acc | 36       | 1 | 1 | 1 | 1 | 1 | 1 | 1 |                | P      |            |            |
| <i>Sonchus ortunoii</i> Svent.                                                                  | Asteraceae | Acc      | Acc  | Acc  | Acc | Acc | Acc  | Acc | 0        |   |   | 1 |   |   |   |   | G              | S      |            |            |
| <i>Sonchus palmensis</i> Boulos                                                                 | Asteraceae | Acc      | Acc  | Acc  | Acc | Acc | Acc  | Acc | 2        |   | 1 |   |   |   |   |   | P              | S      |            |            |
| <i>Sonchus pendulus</i> (Sch.Bip.) Sennikov subsp. <i>pendulus</i>                              | Asteraceae | Syn      | Syn  | Acc  | Syn | Acc | Acc  | NL  | 2        |   |   |   |   | 1 |   |   | C              | S      |            |            |
| <i>Sonchus pendulus</i> (Sch.Bip.) Sennikov subsp. <i>flaccidus</i> (Svent.) N.Kilian & Greuter | Asteraceae | Syn      | Syn  | Acc  | Acc | Acc | Acc  | NL  | 2        |   |   |   |   | 1 |   |   | C              | S      |            |            |
| <i>Sonchus pinnatifidus</i> Cav.                                                                | Asteraceae | Acc      | Acc  | Acc  | Acc | Acc | Acc  | Acc | 4        |   |   |   |   |   | 1 | 1 |                | S      |            |            |
| <i>Sonchus pitardii</i> Boulos                                                                  | Asteraceae | Acc      | Syn  | Acc  | Acc | Acc | Acc  | NL  | 0        | 1 |   |   |   |   |   |   | H              | S      |            |            |
| <i>Sonchus platylepis</i> Webb                                                                  | Asteraceae | Syn      | Syn  | Acc  | Acc | Acc | Acc  | Acc | 3        |   |   |   |   | 1 |   |   | C              | S      |            |            |
| <i>Sonchus radicans</i> Aiton                                                                   | Asteraceae | Acc      | Acc  | Acc  | Acc | Acc | Acc  | Acc | 0        |   |   |   | 1 |   |   |   | T              | S      |            |            |
| <i>Sonchus regis-jubae</i> Pit.                                                                 | Asteraceae | Acc      | Acc  | Acc  | Acc | Acc | Acc  | NL  | 2        |   | 1 | 1 | 1 | 1 |   |   | A              | S      |            |            |
| <i>Sonchus sventenii</i> U.Reifenb. & A.Reifenb.                                                | Asteraceae | Acc      | Acc  | Acc  | Acc | Acc | Acc  | Acc | 4        |   |   | 1 |   |   |   |   | G              | S      |            |            |
| <i>Sonchus tectifolius</i> Svent.                                                               | Asteraceae | Acc      | Acc  | Acc  | Acc | Acc | Acc  | Acc | 1        |   |   |   | 1 |   |   |   | T              | S      |            |            |
| <i>Sonchus tenerrimus</i> L.                                                                    | Asteraceae | Acc      | Acc  | Acc  | Acc | Acc | Acc  | Acc | 1        | 1 | 1 | 1 | 1 | 1 | 1 | 1 |                | P      |            |            |
| <i>Sonchus tuberifer</i> Svent.                                                                 | Asteraceae | Acc      | Acc  | Acc  | Acc | Acc | Acc  | Acc | 0        |   |   |   | 1 |   |   |   | T              | S      |            |            |

| Species Name                                                      | Family          | Atlantis | Muer | POWO | WFO | COL  | GBIF | TRY | POWO Syn | H | P | G | T | C | F | L | Endemic Status | Native | Non native | Ornam Crop |
|-------------------------------------------------------------------|-----------------|----------|------|------|-----|------|------|-----|----------|---|---|---|---|---|---|---|----------------|--------|------------|------------|
| <i>Sonchus webbii</i> Sch.Bip.                                    | Asteraceae      | Syn      | Acc  | Acc  | Acc | Acc  | Acc  | Acc | 3        |   | 1 |   |   |   |   |   | P              | S      |            |            |
| <i>Sonchus wildpretii</i> U.Reifenb. & A.Reifenb.                 | Asteraceae      | Acc      | Acc  | Acc  | Acc | Acc  | Acc  | Acc | 0        |   |   | 1 |   |   |   |   | G              | S      |            |            |
| <i>Sorghum bicolor</i> (L.) Moench.                               | Poaceae         | Acc      | Acc  | Acc  | Acc | Acc  | Acc  | Acc | 177      |   | 1 | 1 |   | 1 |   |   |                |        | P          | C          |
| <i>Sorghum halepense</i> (L.) Pers.                               | Poaceae         | Acc      | Acc  | Acc  | Acc | Acc  | Acc  | Acc | 34       | 1 | 1 | 1 | 1 | 1 | 1 | 1 |                |        | S          | C          |
| <i>Spartium junceum</i> L.                                        | Fabaceae        | Acc      | Acc  | Acc  | Acc | Acc  | Acc  | Acc | 14       | 1 | 1 | 1 | 1 | 1 |   |   |                |        | I          | O          |
| <i>Spathodea campanulata</i> P.Beauv.                             | Bignoniaceae    | NL       | NL   | Acc  | Acc | Acc  | Acc  | Acc | 3        |   | 1 | 1 | 1 |   | 1 | 1 |                |        | S          | O          |
| <i>Spergula arvensis</i> L.                                       | Caryophyllaceae | Acc      | Acc  | Acc  | Acc | Acc  | Acc  | Acc | 21       | 1 | 1 | 1 | 1 | 1 | 1 | 1 |                | P      |            |            |
| <i>Spergula pentandra</i> L.                                      | Caryophyllaceae | Acc      | Acc  | Acc  | Acc | Acc  | Acc  | Acc | 7        | 1 | 1 |   | 1 | 1 |   |   |                | P      |            |            |
| <i>Spergularia bocconeii</i> (Scheele) Asch. & Graebn.            | Caryophyllaceae | Acc      | Acc  | Acc  | Acc | Acc  | Acc  | Acc | 13       | 1 | 1 | 1 | 1 | 1 | 1 | 1 |                | P      |            |            |
| <i>Spergularia bourgaei</i> Lebel                                 | Caryophyllaceae | Acc      | NL   | Acc  | Acc | AmUn | Acc  | NL  | 1        |   |   |   | 1 |   |   |   | T              | S      |            |            |
| <i>Spergularia diandra</i> (Guss.) Heldr.                         | Caryophyllaceae | Acc      | Acc  | Acc  | Acc | Acc  | Acc  | Acc | 24       |   |   |   |   | 1 | 1 | 1 |                | P      |            |            |
| <i>Spergularia fimbriata</i> Boiss. & Reut. var. <i>fimbriata</i> | Caryophyllaceae | NL       | Acc  | NL   | NL  | AmUn | Acc  | NL  |          |   |   |   | 1 | 1 | 1 |   |                | P      |            |            |
| <i>Spergularia flaccida</i> (Madden) I.M.Turner                   | Caryophyllaceae | Syn      | Syn  | Acc  | Syn | Acc  | Acc  | Syn | 9        | 1 |   | 1 | 1 | 1 | 1 | 1 |                | P      |            |            |
| <i>Spergularia marina</i> (L.) Besser                             | Caryophyllaceae | Acc      | Syn  | Acc  | Acc | Acc  | Acc  | Acc | 76       |   | 1 |   | 1 | 1 | 1 | 1 |                | P      |            |            |
| <i>Spergularia media</i> (L.) C.Presl                             | Caryophyllaceae | Acc      | Acc  | Acc  | Acc | Acc  | Acc  | Acc | 47       |   |   | 1 | 1 | 1 | 1 | 1 |                | P      |            |            |
| <i>Sphenopus divaricatus</i> (Gouan) Rchb.                        | Poaceae         | Acc      | Acc  | Acc  | Acc | Acc  | Acc  | Acc | 12       |   |   |   |   |   | 1 |   |                | P      |            |            |
| <i>Spinacia oleracea</i> L.                                       | Amaranthaceae   | Acc      | Acc  | Acc  | Acc | Acc  | Acc  | Acc | 9        |   |   |   | 1 | 1 |   |   |                |        | S          | C          |
| <i>Spirobassia hirsuta</i> (L.) Freitag & G. Kadereit             | Amaranthaceae   | Acc      | Acc  | Acc  | Syn | Acc  | Acc  | Syn | 20       |   |   |   |   | 1 |   |   |                |        | P          |            |
| <i>Spirodela punctata</i> (G.Mey.) C.H.Thomps.                    | Araceae         | Syn      | NL   | Acc  | Acc | Acc  | Acc  | Acc | 4        |   | 1 |   | 1 |   |   |   |                |        | I          |            |
| <i>Sporobolus africanus</i> (Poir.) Robyns & Tournay              | Poaceae         | Acc      | NL   | Acc  | Acc | Acc  | Acc  | Acc | 11       |   | 1 |   |   |   |   |   |                |        | P          |            |
| <i>Sporobolus copei</i> Verloove                                  | Poaceae         | Acc      | Acc  | Acc  | Acc | Acc  | Acc  | Acc | 0        |   |   |   | 1 |   |   |   | T              | S      |            |            |
| <i>Sporobolus diandrus</i> (Retz.) P.Beauv.                       | Poaceae         | Acc      | NL   | Acc  | Acc | Acc  | Acc  | Acc | 9        |   |   |   | 1 |   |   |   |                |        | P          |            |
| <i>Sporobolus indicus</i> (L.) R.Br.                              | Poaceae         | Acc      | Acc  | Acc  | Acc | Acc  | Acc  | Acc | 23       |   | 1 |   | 1 | 1 |   |   |                |        | P          |            |
| <i>Stachys arvensis</i> (L.) L.                                   | Lamiaceae       | Acc      | Acc  | Acc  | Acc | Acc  | Acc  | Acc | 13       | 1 | 1 | 1 | 1 | 1 | 1 | 1 |                | P      |            |            |

| Species Name                                                                                    | Family          | Atlantis | Muer | POWO | WFO | COL | GBIF | TRY | POWO Syn | H | P | G | T | C | F | L | Endemic Status | Native | Non native | Ornam Crop |
|-------------------------------------------------------------------------------------------------|-----------------|----------|------|------|-----|-----|------|-----|----------|---|---|---|---|---|---|---|----------------|--------|------------|------------|
| <i>Stachys germanica</i> L. subsp. <i>cordigera</i> Briq.                                       | Lamiaceae       | Acc      | Acc  | NL   | Syn | Syn | Syn  | NL  |          |   |   |   | 1 |   |   |   |                | P      |            |            |
| <i>Stachys ocymastrum</i> (L.) Briq.                                                            | Lamiaceae       | Acc      | Acc  | Acc  | Acc | Acc | Acc  | Acc | 14       | 1 | 1 | 1 | 1 | 1 | 1 | 1 |                | P      |            |            |
| <i>Stellaria apetala</i> Ucria                                                                  | Caryophyllaceae | Syn      | Syn  | Acc  | Syn | Acc | Acc  | Syn | 8        |   | 1 |   |   | 1 |   | 1 |                |        | P          |            |
| <i>Stellaria media</i> (L.) Vill.                                                               | Caryophyllaceae | Acc      | Acc  | Acc  | Acc | Acc | Acc  | Acc | 59       | 1 | 1 | 1 | 1 | 1 | 1 | 1 |                |        | P          |            |
| <i>Stenocereus dumortieri</i> (Scheidew.) Buxb.                                                 | Cactaceae       | NL       | NL   | Acc  | Syn | Syn | Syn  | Syn | 4        |   |   |   | 1 |   |   |   |                | S      |            | O          |
| <i>Stenocereus pruinosus</i> (Otto ex Pfeiff.) Buxb.                                            | Cactaceae       | NL       | NL   | Acc  | Acc | Acc | Acc  | Acc | 19       |   |   |   | 1 |   |   |   |                | S      |            | O          |
| <i>Stenotaphrum secundatum</i> (Walter) Kuntze                                                  | Poaceae         | Acc      | Acc  | Acc  | Acc | Acc | Acc  | Acc | 10       |   | 1 |   | 1 | 1 | 1 | 1 |                |        | S          |            |
| <i>Stipagrostis ciliata</i> (Desf.) De Winter                                                   | Poaceae         | Acc      | Acc  | Acc  | Acc | Acc | Acc  | Acc | 3        |   | 1 |   |   | 1 | 1 |   |                | P      |            |            |
| <i>Stipellula capensis</i> (Thunb.) Röser & Hamasha                                             | Poaceae         | Acc      | Acc  | Acc  | Syn | Acc | Acc  | Acc | 8        | 1 | 1 | 1 | 1 | 1 | 1 | 1 |                | P      |            |            |
| <i>Streptosolen jamesonii</i> (Benth.) Miers                                                    | Solanaceae      | NL       | NL   | Acc  | Acc | Acc | Acc  | Acc | 2        |   | 1 |   | 1 | 1 |   |   |                |        | S          |            |
| <i>Suaeda ifniensis</i> Caball. ex Maire                                                        | Amaranthaceae   | Acc      | Acc  | Acc  | Acc | Acc | Acc  | Acc | 0        |   |   |   | 1 |   | 1 | 1 |                | P      |            |            |
| <i>Suaeda maritima</i> (L.) Dumort.                                                             | Amaranthaceae   | Acc      | Acc  | Acc  | Acc | Acc | Acc  | Acc | 64       |   |   |   | 1 | 1 | 1 | 1 |                | S      |            |            |
| <i>Suaeda spicata</i> (Willd.) Moq.                                                             | Amaranthaceae   | Acc      | Acc  | Acc  | Acc | Acc | Acc  | Acc | 3        |   |   |   |   |   | 1 |   |                | P      |            |            |
| <i>Suaeda vera</i> Forssk. ex J.F.Gmel.                                                         | Amaranthaceae   | Acc      | Acc  | Acc  | Acc | Acc | Acc  | Acc | 15       |   |   | 1 | 1 | 1 | 1 | 1 |                | S      |            |            |
| <i>Suaeda vermiculata</i> Forssk. ex J.F.Gmel.                                                  | Amaranthaceae   | Acc      | Acc  | Acc  | Acc | Syn | Syn  | Acc | 16       |   |   |   | 1 | 1 | 1 | 1 |                |        | S          |            |
| <i>Succowia balearica</i> (L.) Medik.                                                           | Brassicaceae    | Acc      | NL   | Acc  | Acc | Acc | Acc  | Acc | 4        |   |   |   | 1 |   |   |   |                | P      |            |            |
| <i>Symphyotrichum laeve</i> (L.) Á.Löve & D.Löve                                                | Asteraceae      | Acc      | Acc  | Acc  | Acc | Acc | Acc  | Acc | 34       |   | 1 |   | 1 |   |   |   |                |        | S          | O          |
| <i>Symphyotrichum lanceolatum</i> (Willd.) G.L.Nesom                                            | Asteraceae      | Acc      | Acc  | Acc  | Acc | Acc | Acc  | Acc | 1        |   |   |   | 1 |   |   |   |                |        | S          | O          |
| <i>Symphyotrichum subulatum</i> (Michx.) G.L.Nesom subsp. <i>squamatum</i> (Spreng.) S.D.Sundb. | Asteraceae      | Syn      | Syn  | Acc  | Syn | Acc | Acc  | NL  | 24       | 1 | 1 | 1 | 1 | 1 | 1 | 1 |                |        | S          | O          |
| <i>Syzygium cumini</i> (L.) Skeels                                                              | Myrtaceae       | NL       | NL   | Acc  | Acc | Acc | Acc  | Acc | 43       |   | 1 |   |   | 1 |   |   |                |        | S          |            |
| <i>Syzygium jambos</i> (L.) Alston                                                              | Myrtaceae       | NL       | NL   | Acc  | Acc | Acc | Acc  | Acc | 19       |   | 1 |   | 1 |   |   |   |                |        | S          | O          |
| <i>Taeniatherum caput-medusae</i> (L.) Nevski                                                   | Poaceae         | Acc      | Acc  | Acc  | Acc | Acc | Acc  | Acc | 25       |   |   |   | 1 |   |   |   |                | P      |            |            |
| <i>Tagetes erecta</i> L.                                                                        | Asteraceae      | Syn      | Syn  | Acc  | Acc | Acc | Acc  | Acc | 7        | 1 | 1 | 1 | 1 | 1 |   | 1 |                |        | S          | O          |
| <i>Tagetes minuta</i> L.                                                                        | Asteraceae      | Acc      | Acc  | Acc  | Acc | Acc | Acc  | Acc | 6        |   | 1 | 1 | 1 | 1 |   |   |                |        | S          | O          |

| Species Name                                                                               | Family       | Atlantis | Muer | POWO | WFO  | COL  | GBIF | TRY | POWO Syn | H | P | G | T | C | F | L | Endemic Status | Native | Non native | Ornam Crop |
|--------------------------------------------------------------------------------------------|--------------|----------|------|------|------|------|------|-----|----------|---|---|---|---|---|---|---|----------------|--------|------------|------------|
| <i>Tamarix africana</i> Poir.                                                              | Tamaricaceae | Acc      | Acc  | Acc  | Acc  | Acc  | Acc  | Acc | 18       |   |   |   | 1 | 1 | 1 | 1 |                | S      |            |            |
| <i>Tamarix boveana</i> Bunge                                                               | Tamaricaceae | Acc      | Acc  | Acc  | Acc  | Acc  | Acc  | Acc | 2        |   |   |   |   |   | 1 |   |                | S      |            |            |
| <i>Tamarix canariensis</i> Willd.                                                          | Tamaricaceae | Acc      | Acc  | Acc  | Acc  | Acc  | Acc  | Acc | 10       |   | 1 | 1 | 1 | 1 | 1 | 1 |                | S      |            |            |
| <i>Tanacetum parthenium</i> (L.) Sch. Bip.                                                 | Asteraceae   | Acc      | Acc  | Acc  | Acc  | Acc  | Acc  | Acc | 49       |   | 1 |   | 1 | 1 |   | 1 |                |        | S          |            |
| <i>Tara spinosa</i> (Molina) Britton & Rose                                                | Fabaceae     | Syn      | Syn  | Acc  | Syn  | Syn  | Syn  | Syn | 15       |   |   |   | 1 | 1 | 1 |   |                |        | P          | O          |
| <i>Taraxacum canarense</i> Soest                                                           | Asteraceae   | Acc      | NL   | Acc  | Acc  | Acc  | Acc  | NL  | 0        |   |   | 1 | 1 |   |   |   | A              | S      |            |            |
| <i>Taraxacum degelii</i> G. E. Haglund                                                     | Asteraceae   | Acc      | NL   | Acc  | Acc  | Acc  | Acc  | Acc | 0        |   | 1 |   |   |   |   |   |                |        | S          |            |
| <i>Taraxacum duplidentifrons</i> Dahlst. ex Johnston                                       | Asteraceae   | Acc      | NL   | Acc  | Acc  | Acc  | Acc  | Acc | 1        |   | 1 |   |   |   |   |   |                |        | S          |            |
| <i>Taraxacum duriense</i> Soest                                                            | Asteraceae   | Acc      | NL   | Acc  | Acc  | Acc  | Acc  | NL  | 0        |   |   |   |   | 1 |   |   |                |        | S          |            |
| <i>Taraxacum gelertii</i> Raunk.                                                           | Asteraceae   | Acc      | NL   | Acc  | Acc  | Acc  | Acc  | Acc | 0        |   |   |   | 1 |   |   |   |                |        | S          |            |
| <i>Taraxacum guanchicum</i> A. Galán, E. Linares & V. Orell.                               | Asteraceae   | Acc      | NL   | Acc  | NL   | Acc  | Acc  | NL  | 0        |   |   |   | 1 | 1 |   |   | A              | S      |            |            |
| <i>Taraxacum lidianum</i> Soest                                                            | Asteraceae   | Acc      | NL   | Acc  | Acc  | Acc  | Acc  | NL  | 0        |   | 1 |   |   |   |   |   |                | S      |            |            |
| <i>Taraxacum lucidum</i> Dahlst.                                                           | Asteraceae   | Acc      | NL   | Acc  | Acc  | Acc  | Acc  | Acc | 0        |   |   |   |   | 1 |   |   |                |        | S          |            |
| <i>Taraxacum officinale</i> F.H.Wigg                                                       | Asteraceae   | Syn      | Syn  | Acc  | Syn  | AmUn | Acc  | Acc | 9        |   | 1 | 1 | 1 | 1 | 1 | 1 |                |        | P          |            |
| <i>Tecoma stans</i> (L.) Juss. ex Kunth                                                    | Bignoniaceae | Acc      | Acc  | Acc  | Acc  | Acc  | Acc  | Acc | 3        |   | 1 | 1 | 1 | 1 | 1 | 1 |                |        | S          | O          |
| <i>Tecomaria capensis</i> (Thunb.) Spach                                                   | Bignoniaceae | Acc      | Acc  | Acc  | Acc  | Syn  | Syn  | Syn | 8        | 1 | 1 |   | 1 | 1 | 1 | 1 |                |        | S          | O          |
| <i>Teline canariensis</i> (L.) Webb & Berthel.                                             | Fabaceae     | Acc      | Acc  | Syn  | Syn  | Syn  | Acc  | Syn | 22       |   |   |   | 1 | 1 |   |   | A              | S      |            |            |
| <i>Teline microphylla</i> P.E.Gibbs & Dingwall                                             | Fabaceae     | Acc      | Acc  | Syn  | Syn  | Acc  | Acc  | Syn | 4        |   |   |   |   | 1 |   |   | C              | S      |            |            |
| <i>Teline nervosa</i> (Esteve) Hansen & Sund.                                              | Fabaceae     | Acc      | Acc  | Syn  | AmUn | NL   | Acc  | Syn | 1        |   |   |   |   | 1 |   |   | C              | S      |            |            |
| <i>Teline osyrioides</i> (Svent.) P.E.Gibbs & Ding subsp. <i>osyrioides</i>                | Fabaceae     | Acc      | Acc  | NL   | NL   | NL   | NL   | NL  |          |   |   |   | 1 |   |   |   | T              | S      |            |            |
| <i>Teline osyrioides</i> (Svent.) P.E.Gibbs & Ding subsp. <i>sericea</i> (Kuntze) del Arco | Fabaceae     | Acc      | NL   | NL   | NL   | NL   | NL   | NL  |          |   |   |   | 1 |   |   |   | T              | S      |            |            |
| <i>Teline pallida</i> (Poir.) G. Kunkel subsp. <i>pallida</i>                              | Fabaceae     | Acc      | Acc  | NL   | NL   | NL   | Syn  | NL  |          |   |   |   | 1 |   |   |   | T              | S      |            |            |
| <i>Teline pallida</i> (Poir.) G. Kunkel subsp. <i>gomeræ</i>                               | Fabaceae     | Acc      | Acc  | AmUn | NL   | NL   | Syn  | NL  | 2        |   |   | 1 |   |   |   |   | G              | S      |            |            |

| Species Name                                                                                                   | Family       | Atlantis | Muer | POWO | WFO  | COL | GBIF | TRY | POWO Syn | H | P | G | T | C | F | L | Endemic Status | Native | Non native | Ornam Crop |
|----------------------------------------------------------------------------------------------------------------|--------------|----------|------|------|------|-----|------|-----|----------|---|---|---|---|---|---|---|----------------|--------|------------|------------|
| <i>Teline pallida</i> (Poir.) G. Kunkel subsp. <i>silensis</i>                                                 | Fabaceae     | Acc      | NL   | AmUn | NL   | NL  | Syn  | NL  | 0        |   |   |   | 1 |   |   |   | T              | S      |            |            |
| <i>Teline rosmarinifolia</i> Webb & Berthel. subsp. <i>rosmarinifolia</i> Arco                                 | Fabaceae     | Acc      | Acc  | NL   | NL   | NL  | Acc  | NL  | 8        |   |   |   |   | 1 |   |   | C              | S      |            |            |
| <i>Teline rosmarinifolia</i> Webb & Berthel. subsp. <i>eurifolia</i>                                           | Fabaceae     | Acc      | Acc  | NL   | NL   | NL  | NL   | NL  |          |   |   |   |   | 1 |   |   | C              | S      |            |            |
| <i>Teline salsoloides</i> del Acro & Acebes                                                                    | Fabaceae     | Acc      | Acc  | AmUn | AmUn | NL  | Acc  | NL  | 0        |   |   |   | 1 |   |   |   | T              | S      |            |            |
| <i>Teline splendens</i> (Webb & Berthel.) del Arco                                                             | Fabaceae     | Acc      | Acc  | Syn  | AmUn | Syn | Acc  | NL  | 1        |   | 1 |   |   |   |   |   | P              | S      |            |            |
| <i>Teline stenopetala</i> (Webb & Berthel.) Webb & Berthel. subsp. <i>stenopetala</i>                          | Fabaceae     | Acc      | Acc  | NL   | NL   | NL  | Acc  | NL  |          |   | 1 |   | 1 | 1 |   |   |                | S      |            |            |
| <i>Teline stenopetala</i> (Webb & Berthel.) Webb & Berthel. subsp. <i>microphylla</i> (Pit. & Proust) del Arco | Fabaceae     | Acc      | Acc  | NL   | NL   | NL  | NL   | NL  |          | 1 |   | 1 |   |   |   |   | A              | S      |            |            |
| <i>Teline stenopetala</i> (Webb & Berthel.) Webb & Berthel. subsp. <i>pauciovulata</i> (del Arco) del Arco     | Fabaceae     | Acc      | Acc  | NL   | NL   | NL  | NL   | NL  |          |   |   | 1 |   |   |   |   | G              | S      |            |            |
| <i>Teline stenopetala</i> (Webb & Berthel.) Webb & Berthel. subsp. <i>sericea</i> (Pit. & Proust) del Arco     | Fabaceae     | Acc      | Acc  | NL   | NL   | NL  | NL   | NL  |          |   | 1 |   |   |   |   |   | P              | S      |            |            |
| <i>Teline stenopetala</i> (Webb & Berthel.) Webb & Berthel. subsp. <i>spachiana</i> (Webb) del Arco            | Fabaceae     | Acc      | Acc  | NL   | NL   | NL  | NL   | NL  |          |   |   |   | 1 |   |   |   | T              | S      |            |            |
| <i>Tephrocactus articulatus</i> (Pfeiff.) Backeb.                                                              | Cactaceae    | Acc      | NL   | Acc  | Syn  | Syn | Acc  | Acc | 45       |   |   |   | 1 |   |   |   |                |        | S          | O          |
| <i>Tetraclinis articulata</i> (Vahl) Mast.                                                                     | Cupressaceae | Acc      | Acc  | Acc  | Acc  | Acc | Acc  | Acc | 8        |   |   |   |   | 1 |   |   |                |        | S          | O          |
| <i>Tetragonia echinata</i> Aiton                                                                               | Aizoaceae    | Acc      | Acc  | Acc  | Acc  | Acc | Acc  | Acc | 0        |   |   |   |   | 1 |   |   |                |        | S          |            |
| <i>Tetragonia tetragonoides</i> (Pall.) Kuntze                                                                 | Aizoaceae    | Acc      | Acc  | Acc  | Acc  | Acc | Acc  | Acc | 11       | 1 | 1 | 1 | 1 | 1 |   |   |                |        | S          |            |
| <i>Tetrapogon villosus</i> Desf.                                                                               | Poaceae      | Acc      | Acc  | Acc  | Acc  | Acc | Acc  | Acc | 2        |   |   | 1 | 1 | 1 | 1 | 1 |                | P      |            |            |
| <i>Teucrium heterophyllum</i> L'Hér subsp. <i>brevipilosum</i> Gaisberg                                        | Lamiaceae    | Acc      | Acc  | Acc  | Acc  | Acc | Acc  | NL  | 1        |   | 1 | 1 | 1 | 1 |   |   | A              | S      |            |            |
| <i>Teucrium heterophyllum</i> L'Hér subsp. <i>hierrense</i> Gaisberg                                           | Lamiaceae    | Acc      | Acc  | Acc  | NL   | Acc | Acc  | NL  | 0        | 1 |   |   |   |   |   |   | H              | S      |            |            |
| <i>Teucrium spinosum</i> L.                                                                                    | Lamiaceae    | Acc      | Acc  | Acc  | Acc  | Acc | Acc  | Acc | 4        |   |   |   | 1 | 1 |   |   |                |        | S          |            |
| <i>Theligonum cynocrambe</i> L.                                                                                | Rubiaceae    | Acc      | Acc  | Acc  | Acc  | Acc | Acc  | Acc | 6        |   | 1 | 1 | 1 | 1 |   |   |                | P      |            |            |

| Species Name                                                       | Family           | Atlantis | Muer | POWO | WFO  | COL  | GBIF | TRY | POWO Syn | H | P | G | T | C | F | L | Endemic Status | Native | Non native | Ornam Crop |
|--------------------------------------------------------------------|------------------|----------|------|------|------|------|------|-----|----------|---|---|---|---|---|---|---|----------------|--------|------------|------------|
| <i>Thelocactus hastifer</i> (Werderm. et Boed.) F.M.Knuth          | Cactaceae        | NL       | NL   | Acc  | Acc  | Acc  | Acc  | NL  | 2        |   |   |   | 1 |   |   |   |                |        | S          | O          |
| <i>Thelypteris dentata</i> (Forssk.) E.P.St.John                   | Thelypteridaceae | Syn      | Syn  | Acc  | Syn  | Acc  | Syn  | Syn | 62       |   | 1 | 1 | 1 | 1 |   |   |                | S      |            |            |
| <i>Thesium canariensis</i> (Stearn) J.C.Manning & F.Forest         | Santalaceae      | Syn      | Syn  | Acc  | Syn  | Acc  | Acc  | Syn | 1        |   |   |   |   | 1 |   |   | C              | S      |            |            |
| <i>Thesium humile</i> Vahl.                                        | Santalaceae      | Acc      | Acc  | Acc  | Acc  | Acc  | Acc  | Acc | 5        |   | 1 | 1 | 1 | 1 | 1 | 1 |                | P      |            |            |
| <i>Thesium psilotocladum</i> Svent.                                | Santalaceae      | Syn      | Syn  | Acc  | AmUn | Acc  | Acc  | NL  | 1        |   |   |   | 1 |   |   |   | T              | S      |            |            |
| <i>Thesium retamoides</i> (A.Santos) J.C.Manning & F.Forest        | Santalaceae      | Syn      | Syn  | Acc  | Syn  | Acc  | Acc  | Syn | 1        |   | 1 |   | 1 |   |   |   | A              | S      |            |            |
| <i>Thesium subsucculentum</i> (Kämmer) J.C.Manning & F.Forest      | Santalaceae      | Syn      | Syn  | Acc  | Syn  | Acc  | Acc  | Syn | 1        |   |   |   | 1 |   |   |   | T              | S      |            |            |
| <i>Thlaspi arvense</i> L.                                          | Brassicaceae     | Acc      | Acc  | Acc  | Acc  | Acc  | Acc  | Acc | 10       |   |   |   | 1 |   |   |   |                | P      |            |            |
| <i>Thunbergia alata</i> Bojer ex Sims                              | Acanthaceae      | NL       | NL   | Acc  | Acc  | Acc  | Acc  | Acc | 12       |   | 1 | 1 | 1 | 1 |   |   |                |        | S          | O          |
| <i>Thunbergia grandiflora</i> (Roxb. ex Rottl.) Roxb.              | Acanthaceae      | NL       | NL   | Acc  | Acc  | Acc  | Acc  | Acc | 9        |   | 1 | 1 |   | 1 |   |   |                |        | S          | O          |
| <i>Thymus origanoides</i> Webb & Berthel.                          | Lamiaceae        | Acc      | Acc  | Acc  | Acc  | Acc  | Acc  | Acc | 1        |   |   |   |   |   |   | 1 | L              | S      |            |            |
| <i>Thymus vulgaris</i> L.                                          | Lamiaceae        | Acc      | Acc  | Acc  | Acc  | Acc  | Acc  | Acc | 2        |   |   |   | 1 |   |   |   |                |        | S          | C          |
| <i>Tillandsia bergeri</i> Mez.                                     | Bromeliaceae     | Acc      | NL   | Acc  | Acc  | Acc  | Acc  | Acc | 0        |   |   |   | 1 |   |   |   |                |        | S          | O          |
| <i>Tipuana tipu</i> (Benth.) Kuntze                                | Fabaceae         | Acc      | Acc  | Acc  | Acc  | Acc  | Acc  | Acc | 3        |   |   |   |   | 1 |   |   |                |        | P          | O          |
| <i>Tithonia diversifolia</i> (Hemsl.) A.Gray                       | Asteraceae       | Acc      | Acc  | Acc  | Acc  | Acc  | Acc  | Acc | 4        |   | 1 |   | 1 |   |   |   |                |        | S          | O          |
| <i>Todaroa aurea</i> (Sol.) Parl. subsp. <i>aurea</i>              | Apiaceae         | Acc      | Acc  | NL   | NL   | Acc  | Acc  | NL  |          |   | 1 |   | 1 |   |   |   | A              | S      |            |            |
| <i>Todaroa aurea</i> (Sol.) Parl. subsp. <i>suaveolens</i> P.Pérez | Apiaceae         | Acc      | Acc  | Acc  | NL   | Acc  | Acc  | NL  | 0        | 1 | 1 | 1 | 1 | 1 |   |   | A              | S      |            |            |
| <i>Tolpis barbata</i> (L.) Gaertn. subsp. <i>barbata</i>           | Asteraceae       | NL       | Acc  | NL   | Syn  | AmUn | Syn  | NL  |          | 1 | 1 | 1 | 1 | 1 | 1 | 1 |                | P      |            |            |
| <i>Tolpis calderae</i> Bolle                                       | Asteraceae       | Acc      | Acc  | Acc  | Acc  | Acc  | Acc  | NL  | 0        |   | 1 |   |   |   |   |   | P              | S      |            |            |
| <i>Tolpis coronopifolia</i> (Desf.) Bif.                           | Asteraceae       | Acc      | Acc  | Acc  | Acc  | Acc  | Acc  | NL  | 6        |   | 1 |   | 1 | 1 |   |   | A              | S      |            |            |
| <i>Tolpis crassiuscula</i> Svent.                                  | Asteraceae       | Acc      | Acc  | Acc  | Acc  | Acc  | Acc  | Acc | 0        |   |   |   | 1 |   |   |   | T              | S      |            |            |
| <i>Tolpis glabrescens</i> Kämmer                                   | Asteraceae       | Acc      | Acc  | Acc  | Acc  | Acc  | Acc  | NL  | 0        |   |   |   | 1 |   |   |   | T              | S      |            |            |

| Species Name                                                                     | Family         | Atlantis | Muer | POWO | WFO | COL | GBIF | TRY | POWO Syn | H | P | G | T | C | F | L | Endemic Status | Native | Non native | Ornam Crop |
|----------------------------------------------------------------------------------|----------------|----------|------|------|-----|-----|------|-----|----------|---|---|---|---|---|---|---|----------------|--------|------------|------------|
| <i>Tolpis laciniata</i> (Sch.Bip.) Webb                                          | Asteraceae     | Acc      | Acc  | Acc  | Acc | Acc | Acc  | Acc | 1        | 1 | 1 | 1 | 1 |   |   |   | A              | S      |            |            |
| <i>Tolpis lagopoda</i> C.Sm. ex Link.                                            | Asteraceae     | Acc      | Acc  | Acc  | Acc | Acc | Acc  | Acc | 2        |   | 1 |   | 1 | 1 |   |   | A              | S      |            |            |
| <i>Tolpis proustii</i> Pit.                                                      | Asteraceae     | Acc      | Acc  | Acc  | Acc | Acc | Acc  | Acc | 0        | 1 |   | 1 |   |   |   |   | A              | S      |            |            |
| <i>Tolpis santosii</i> D.J.Crawford, Mort & J.K.Archibald                        | Asteraceae     | Acc      | Acc  | Acc  | NL  | Acc | Acc  | NL  | 0        |   | 1 |   |   |   |   |   | P              | S      |            |            |
| <i>Tolpis umbellata</i> Bertol.                                                  | Asteraceae     | NL       | Acc  | Acc  | Acc | Acc | Acc  | Acc | 10       | 1 | 1 | 1 | 1 | 1 | 1 | 1 |                | P      |            |            |
| <i>Tolpis webbii</i> Sch.Bip.                                                    | Asteraceae     | Acc      | Acc  | Acc  | Acc | Acc | Acc  | Acc | 1        |   |   |   | 1 |   |   |   | T              | S      |            |            |
| <i>Torilis arvensis</i> (Schult.) Thell. subsp. <i>neglecta</i> (Schult.) Thell. | Apiaceae       | Acc      | Acc  | NL   | Acc | Acc | Acc  | Acc |          | 1 | 1 |   | 1 |   | 1 | 1 |                | P      |            |            |
| <i>Torilis elongata</i> (Hoffmanns. & Link) Samp.                                | Apiaceae       | Acc      | Acc  | Acc  | Syn | Syn | Acc  | NL  | 12       | 1 | 1 | 1 | 1 | 1 | 1 | 1 |                | P      |            |            |
| <i>Torilis leptophylla</i> (L.) Rchb.f.                                          | Apiaceae       | Acc      | Acc  | Acc  | Acc | Acc | Acc  | Acc | 11       | 1 | 1 | 1 | 1 |   | 1 | 1 |                | P      |            |            |
| <i>Torilis nodosa</i> (L.) Gaertn.                                               | Apiaceae       | Acc      | Acc  | Acc  | Acc | Acc | Acc  | Acc | 11       | 1 | 1 | 1 | 1 | 1 | 1 | 1 |                | P      |            |            |
| <i>Torilis webbii</i> Bianca                                                     | Apiaceae       | Syn      | Syn  | Syn  | Acc | Syn | Acc  | Acc |          |   |   |   | 1 |   | 1 | 1 |                | P      |            |            |
| <i>Tradescantia cerinthoides</i> Kunth                                           | Commelinaceae  | Acc      | Acc  | Acc  | Acc | Acc | Acc  | Acc | 3        |   |   |   |   | 1 |   |   |                |        | S          | O          |
| <i>Tradescantia fluminensis</i> Vell.                                            | Commelinaceae  | Acc      | Acc  | Acc  | Acc | Acc | Acc  | Acc | 2        |   | 1 | 1 | 1 | 1 |   |   |                |        | I          | O          |
| <i>Tradescantia pallida</i> (Rose) D.R.Hunt                                      | Commelinaceae  | Acc      | Acc  | Acc  | Acc | Acc | Acc  | Acc | 6        |   | 1 | 1 | 1 | 1 |   |   |                |        | S          | O          |
| <i>Tradescantia sillamontana</i> Matuda                                          | Commelinaceae  | NL       | NL   | Acc  | Acc | Acc | Acc  | Acc | 1        |   | 1 |   |   |   |   |   |                |        | S          |            |
| <i>Tradescantia spathacea</i> Sw.                                                | Commelinaceae  | NL       | NL   | Acc  | Acc | Acc | Acc  | Acc | 9        |   |   |   |   | 1 |   |   |                |        | S          |            |
| <i>Tradescantia zebrina</i> Bosse                                                | Commelinaceae  | Acc      | Acc  | Acc  | Acc | Acc | Acc  | Acc | 1        |   | 1 |   | 1 | 1 |   |   |                |        | S          | O          |
| <i>Traganum moquinii</i> Webb ex Moq.                                            | Amaranthaceae  | Acc      | Acc  | Acc  | Acc | Acc | Acc  | Acc | 0        |   |   | 1 | 1 | 1 | 1 | 1 |                | S      |            |            |
| <i>Tragopogon porrifolius</i> L. subsp. <i>australis</i> (Jord.) Nyman           | Asteraceae     | NL       | NL   | NL   | Acc | Acc | Acc  | Acc |          |   | 1 | 1 | 1 | 1 |   |   |                |        | P          |            |
| <i>Tragus racemosus</i> (L.) All.                                                | Poaceae        | Acc      | Acc  | Acc  | Acc | Acc | Acc  | Acc | 19       | 1 | 1 | 1 | 1 | 1 | 1 | 1 |                | P      |            |            |
| <i>Tribulus terrestris</i> L.                                                    | Zygophyllaceae | Acc      | Acc  | Acc  | Acc | Acc | Acc  | Acc | 22       |   | 1 |   | 1 | 1 | 1 |   |                |        | P          |            |
| <i>Trichocereus macrogonus</i> (Salm-Dyck) Riccob.                               | Cactaceae      | NL       | NL   | Acc  | Syn | NL  | Acc  | NL  | 14       |   |   |   | 1 |   |   |   |                | S      |            | O          |
| <i>Tricholaena teneriffae</i> (L.f.) Link                                        | Poaceae        | Acc      | Acc  | Acc  | Acc | Acc | Acc  | Acc | 5        | 1 | 1 | 1 | 1 | 1 | 1 | 1 |                | S      |            |            |



| Species Name                        | Family           | Atlantis | Muer | POWO | WFO  | COL | GBIF | TRY | POWO Syn | H | P | G | T | C | F | L | Endemic Status | Native | Non native | Ornam Crop |
|-------------------------------------|------------------|----------|------|------|------|-----|------|-----|----------|---|---|---|---|---|---|---|----------------|--------|------------|------------|
| <i>Trichomanes speciosum</i> Willd. | Hymenophyllaceae | Syn      | Syn  | Acc  | AmUn | Syn | Syn  | Acc | 8        | 1 | 1 | 1 | 1 | 1 |   |   |                | S      |            |            |
| <i>Trifolium angustifolium</i> L.   | Fabaceae         | Acc      | Acc  | Acc  | Acc  | Acc | Acc  | Acc | 1        | 1 | 1 | 1 | 1 | 1 | 1 | 1 |                | P      |            |            |
| <i>Trifolium arvense</i> L.         | Fabaceae         | Acc      | Acc  | Acc  | Acc  | Acc | Acc  | Acc | 21       | 1 | 1 | 1 | 1 | 1 | 1 | 1 |                | P      |            |            |
| <i>Trifolium aureum</i> Pollich     | Fabaceae         | Acc      | Acc  | Acc  | Acc  | Acc | Acc  | Acc | 3        |   | 1 | 1 |   | 1 |   | 1 |                |        | P          |            |
| <i>Trifolium bocconeii</i> Savi     | Fabaceae         | Acc      | Acc  | Acc  | Acc  | Acc | Acc  | Acc | 3        | 1 | 1 | 1 | 1 |   |   |   |                | P      |            |            |
| <i>Trifolium campestre</i> Schreb.  | Fabaceae         | Acc      | Acc  | Acc  | Acc  | Acc | Acc  | Acc | 2        | 1 | 1 | 1 | 1 | 1 | 1 | 1 |                | P      |            |            |
| <i>Trifolium cernuum</i> Brot.      | Fabaceae         | Acc      | NL   | Acc  | Acc  | Acc | Acc  | Acc | 5        |   |   |   | 1 |   |   |   |                |        | P          |            |
| <i>Trifolium cherleri</i> L.        | Fabaceae         | Acc      | Acc  | Acc  | Acc  | Acc | Acc  | Acc | 5        | 1 | 1 | 1 | 1 | 1 |   |   |                | P      |            |            |
| <i>Trifolium dubium</i> Sibth.      | Fabaceae         | Acc      | Acc  | Acc  | Acc  | Acc | Acc  | Acc | 6        | 1 | 1 | 1 | 1 | 1 | 1 |   |                | P      |            |            |
| <i>Trifolium fragiferum</i> L.      | Fabaceae         | Acc      | Acc  | Acc  | Acc  | Acc | Acc  | Acc | 2        |   |   |   | 1 | 1 |   |   |                | P      |            |            |
| <i>Trifolium gemellum</i> Willd.    | Fabaceae         | Acc      | Acc  | Acc  | Acc  | Acc | Acc  | Acc | 0        | 1 |   |   | 1 |   |   |   |                |        | P          |            |
| <i>Trifolium glomeratum</i> L.      | Fabaceae         | Acc      | Acc  | Acc  | Acc  | Acc | Acc  | Acc | 5        | 1 | 1 | 1 | 1 | 1 | 1 | 1 |                | P      |            |            |
| <i>Trifolium hirtum</i> All.        | Fabaceae         | Acc      | Acc  | Acc  | Acc  | Acc | Acc  | Acc | 4        |   |   |   | 1 |   |   |   |                |        | P          |            |
| <i>Trifolium lappaceum</i> L.       | Fabaceae         | Acc      | Acc  | Acc  | Acc  | Acc | Acc  | Acc | 0        |   |   | 1 | 1 |   |   | 1 |                | P      |            |            |
| <i>Trifolium ligusticum</i> Loisel. | Fabaceae         | Acc      | Acc  | Acc  | Acc  | Acc | Acc  | Acc | 5        | 1 | 1 | 1 | 1 | 1 |   |   |                | P      |            |            |
| <i>Trifolium micranthum</i> Viv.    | Fabaceae         | Acc      | Acc  | Acc  | Acc  | Acc | Acc  | Acc | 9        |   | 1 |   |   |   |   |   |                | P      |            |            |
| <i>Trifolium obscurum</i> Savi      | Fabaceae         | Acc      | Syn  | Acc  | Acc  | Acc | Acc  | Acc | 0        |   | 1 | 1 |   | 1 |   |   |                |        | P          |            |
| <i>Trifolium occidentale</i> Coombe | Fabaceae         | NL       | NL   | Acc  | Syn  | Syn | Acc  | Syn | 2        |   | 1 |   |   |   |   |   |                |        | S          |            |
| <i>Trifolium pratense</i> L.        | Fabaceae         | Acc      | Acc  | Acc  | Acc  | Acc | Acc  | Acc | 1        |   |   |   | 1 | 1 | 1 |   |                |        | S          |            |
| <i>Trifolium repens</i> L.          | Fabaceae         | Acc      | Acc  | Acc  | Acc  | Acc | Acc  | Acc | 1        | 1 | 1 |   | 1 | 1 | 1 |   |                |        | S          |            |
| <i>Trifolium resupinatum</i> L.     | Fabaceae         | Acc      | Acc  | Acc  | Acc  | Acc | Acc  | Acc | 2        |   |   | 1 | 1 | 1 |   |   |                | P      |            |            |
| <i>Trifolium scabrum</i> L.         | Fabaceae         | Acc      | Acc  | Acc  | Acc  | Acc | Acc  | Acc | 3        | 1 | 1 | 1 | 1 | 1 | 1 | 1 |                | P      |            |            |
| <i>Trifolium spumosum</i> L.        | Fabaceae         | Acc      | Acc  | Acc  | Acc  | Acc | Acc  | Acc | 4        |   |   |   |   | 1 |   |   |                | P      |            |            |
| <i>Trifolium squamosum</i> L.       | Fabaceae         | Acc      | Acc  | Acc  | Acc  | Acc | Acc  | Acc | 15       |   | 1 | 1 |   |   |   |   |                | P      |            |            |

| Species Name                                                  | Family         | Atlantis | Muer | POWO | WFO | COL | GBIF | TRY | POWO Syn | H | P | G | T | C | F | L | Endemic Status | Native | Non native | Ornam Crop |
|---------------------------------------------------------------|----------------|----------|------|------|-----|-----|------|-----|----------|---|---|---|---|---|---|---|----------------|--------|------------|------------|
| <i>Trifolium squarrosus</i> L.                                | Fabaceae       | Acc      | Acc  | Acc  | Acc | Acc | Acc  | Acc | 0        |   | 1 | 1 | 1 | 1 |   |   |                | P      |            |            |
| <i>Trifolium stellatum</i> L.                                 | Fabaceae       | Acc      | Acc  | Acc  | Acc | Acc | Acc  | Acc | 0        |   | 1 | 1 | 1 | 1 | 1 | 1 |                | P      |            |            |
| <i>Trifolium striatum</i> L.                                  | Fabaceae       | Acc      | Acc  | Acc  | Acc | Acc | Acc  | Acc | 6        | 1 | 1 | 1 | 1 | 1 | 1 |   |                | P      |            |            |
| <i>Trifolium subterraneum</i> L.                              | Fabaceae       | Acc      | Acc  | Acc  | Acc | Acc | Acc  | Acc | 2        | 1 | 1 | 1 | 1 | 1 |   |   |                | P      |            |            |
| <i>Trifolium suffocatum</i> L.                                | Fabaceae       | Acc      | Acc  | Acc  | Acc | Acc | Acc  | Acc | 4        | 1 | 1 |   | 1 | 1 |   |   |                | P      |            |            |
| <i>Trifolium tomentosum</i> L.                                | Fabaceae       | Acc      | Acc  | Acc  | Acc | Acc | Acc  | Acc | 6        | 1 | 1 | 1 | 1 | 1 | 1 | 1 |                | P      |            |            |
| <i>Trigonella anguina</i> Delile                              | Fabaceae       | Acc      | NL   | Acc  | Acc | Acc | Acc  | Acc | 4        |   |   | 1 |   |   | 1 | 1 |                | P      |            |            |
| <i>Trigonella stellata</i> Forrsk.                            | Fabaceae       | Acc      | Acc  | Acc  | Acc | Acc | Acc  | Acc | 8        |   |   |   | 1 | 1 | 1 | 1 |                | S      |            |            |
| <i>Triplachne nitens</i> (Guss.) Link                         | Poaceae        | Acc      | Acc  | Acc  | Acc | Acc | Acc  | Acc | 6        |   |   |   |   | 1 | 1 | 1 |                | S      |            |            |
| <i>Tripleurospermum inodorum</i> (L.) Sch.Bip.                | Asteraceae     | Acc      | Acc  | Acc  | Acc | Acc | Acc  | Acc | 36       |   |   |   |   | 1 |   |   |                |        | S          |            |
| <i>Trisetaria lapalmae</i> H.Scholz                           | Poaceae        | Acc      | NL   | Syn  | Syn | Syn | Syn  | NL  |          | 1 | 1 |   | 1 | 1 | 1 | 1 | A              | S      |            |            |
| <i>Trisetaria loeflingiana</i> (L.) Paunero                   | Poaceae        | Acc      | Acc  | Acc  | Acc | Acc | Acc  | Acc | 17       |   | 1 |   |   |   | 1 | 1 |                | P      |            |            |
| <i>Trisetaria panicea</i> (Lam.) Paunero                      | Poaceae        | Acc      | Acc  | Acc  | Acc | Acc | Acc  | Acc | 22       | 1 | 1 | 1 | 1 | 1 | 1 | 1 |                | P      |            |            |
| <i>Trisetum tamonanteae</i> Marrero Rodr. & S. Scholz         | Poaceae        | Acc      | Acc  | Acc  | NL  | Acc | Acc  | NL  | 0        |   |   |   |   |   | 1 |   | F              | S      |            |            |
| <i>Triticum aestivum</i> L. subsp. <i>aestivum</i>            | Poaceae        | NL       | Acc  | Acc  | Syn | Acc | Acc  | Acc | 89       |   | 1 |   |   | 1 | 1 |   |                |        | S          | C          |
| <i>Triticum turgidum</i> L. subsp. <i>durum</i> (Desf.) Husn. | Poaceae        | Acc      | NL   | Acc  | Syn | Acc | Acc  | Syn | 59       |   |   |   |   |   | 1 |   |                |        | S          | C          |
| <i>Tropaeolum majus</i> L.                                    | Tropaeolaceae  | Acc      | Acc  | Acc  | Acc | Acc | Acc  | Acc | 20       | 1 | 1 | 1 | 1 | 1 | 1 | 1 |                |        | I          | O          |
| <i>Tuberaria guttata</i> (L.) Fourr.                          | Cistaceae      | Acc      | Acc  | Acc  | Acc | Acc | Acc  | Acc | 48       | 1 | 1 | 1 | 1 | 1 | 1 | 1 |                | P      |            |            |
| <i>Tuberaria lignosa</i> (Sweet) Samp.                        | Cistaceae      | Acc      | Acc  | Acc  | Acc | Acc | Acc  | Acc | 11       |   | 1 |   | 1 |   |   |   |                | P      |            |            |
| <i>Turnera ulmifolia</i> L.                                   | Passifloraceae | Acc      | Acc  | Acc  | Acc | Acc | Acc  | Acc | 11       |   | 1 |   | 1 | 1 | 1 | 1 |                |        | S          | O          |
| <i>Typha domingensis</i> Pers.                                | Typhaceae      | Acc      | Acc  | Acc  | Acc | Acc | Acc  | Acc | 28       |   |   | 1 | 1 | 1 | 1 |   |                | P      |            | O          |
| <i>Ulex europaeus</i> L. subsp. <i>europaeus</i>              | Fabaceae       | Acc      | NL   | Acc  | Syn | Acc | Acc  | Acc | 12       |   |   |   | 1 |   |   |   |                |        | I          |            |
| <i>Ulmus minor</i> Mill.                                      | Ulmaceae       | Acc      | Acc  | Acc  | Acc | Acc | Acc  | Acc | 61       |   | 1 |   | 1 | 1 |   |   |                |        | S          |            |
| <i>Umbilicus heylandianus</i> Webb & Berthel.                 | Crassulaceae   | Acc      | Acc  | Acc  | Acc | Acc | Acc  | NL  | 8        |   | 1 |   |   | 1 |   |   |                | P      |            |            |

| Species Name                                                | Family           | Atlantis | Muer | POWO | WFO | COL | GBIF | TRY | POWO Syn | H | P | G | T | C | F | L | Endemic Status | Native | Non native | Ornam Crop |
|-------------------------------------------------------------|------------------|----------|------|------|-----|-----|------|-----|----------|---|---|---|---|---|---|---|----------------|--------|------------|------------|
| <i>Umbilicus horizontalis</i> (Guss.) DC.                   | Crassulaceae     | Syn      | Syn  | Acc  | Acc | Acc | Acc  | Acc | 7        | 1 | 1 | 1 | 1 | 1 | 1 | 1 |                | P      |            |            |
| <i>Urochloa mutica</i> (Forssk.) T.Q. Nguyen                | Poaceae          | Acc      | NL   | Acc  | Syn | Syn | Syn  | Syn | 14       |   | 1 |   |   | 1 |   |   |                |        | I          |            |
| <i>Urochloa plantaginea</i> (Link) R.D.Webster              | Poaceae          | Acc      | NL   | Acc  | Syn | Syn | Syn  | Syn | 6        |   |   |   |   | 1 |   |   |                |        | I          |            |
| <i>Urochloa subquadrifera</i> (Trin.) R.D.Webster           | Poaceae          | NL       | NL   | Acc  | Syn | Syn | Acc  | Syn | 5        |   |   |   | 1 |   |   |   |                |        | S          |            |
| <i>Urospermum picroides</i> (L.) Scop. ex F.W.Schmidt       | Asteraceae       | Acc      | Acc  | Acc  | Acc | Acc | Acc  | Acc | 12       | 1 | 1 | 1 | 1 | 1 | 1 | 1 |                | P      |            |            |
| <i>Urtica membranacea</i> Poir. ex Savigny                  | Urticaceae       | Acc      | Acc  | Acc  | Acc | Acc | Acc  | Acc | 9        | 1 | 1 | 1 | 1 | 1 | 1 |   |                | P      |            |            |
| <i>Urtica morifolia</i> Poir.                               | Urticaceae       | Acc      | Acc  | Acc  | Acc | Acc | Acc  | Acc | 1        | 1 | 1 | 1 | 1 | 1 |   |   |                | S      |            |            |
| <i>Urtica stachyoides</i> Webb & Berthel.                   | Urticaceae       | Acc      | Acc  | Acc  | Acc | Acc | Acc  | Acc | 2        | 1 | 1 |   | 1 | 1 |   |   | A              | S      |            |            |
| <i>Urtica urens</i> L.                                      | Urticaceae       | Acc      | Acc  | Acc  | Acc | Acc | Acc  | Acc | 9        | 1 | 1 | 1 | 1 | 1 | 1 | 1 |                | P      |            |            |
| <i>Vachellia farnesiana</i> (L.) Wight & Arn.               | Fabaceae         | Syn      | Syn  | Acc  | Syn | Acc | Acc  | Acc | 4        | 1 |   | 1 | 1 | 1 | 1 | 1 |                |        | I          | O          |
| <i>Valantia hispida</i> L.                                  | Rubiaceae        | Acc      | Acc  | Acc  | Acc | Acc | Acc  | Acc | 1        | 1 | 1 | 1 | 1 | 1 | 1 | 1 |                | P      |            |            |
| <i>Valeriana calcitrapae</i> L.                             | Caprifoliaceae   | Syn      | Syn  | Acc  | Syn | NL  | Syn  | Syn | 13       | 1 | 1 | 1 | 1 | 1 |   |   |                | P      |            |            |
| <i>Valeriana carinata</i> (Loisel.) Christenh. & Byng       | Caprifoliaceae   | Syn      | Syn  | Acc  | Syn | Syn | Syn  | Syn | 8        |   |   |   | 1 |   |   |   |                |        | P          |            |
| <i>Valeriana coronata</i> (L.) Mill.                        | Caprifoliaceae   | Syn      | Syn  | Acc  | Syn | Syn | Acc  | Syn | 12       |   |   |   |   | 1 |   |   |                |        | P          |            |
| <i>Valeriana dentata</i> (L.) All.                          | Caprifoliaceae   | Syn      | Syn  | Acc  | Syn | Syn | Syn  | Syn | 21       |   | 1 |   |   |   |   |   |                |        | P          |            |
| <i>Valeriana discoidea</i> (L.) Willd.                      | Caprifoliaceae   | Syn      | Syn  | Acc  | Syn | Syn | Syn  | Syn | 8        |   |   |   |   |   | 1 |   |                |        | P          |            |
| <i>Valeriana eriocarpa</i> (Desv.) Christenh. & Byng        | Caprifoliaceae   | Syn      | Syn  | Acc  | Syn | Syn | Syn  | Syn | 10       |   |   |   | 1 | 1 |   |   |                |        | P          |            |
| <i>Valeriana locusta</i> L.                                 | Caprifoliaceae   | Syn      | Syn  | Acc  | Syn | Syn | Acc  | Syn | 18       |   |   |   | 1 | 1 |   |   |                |        | P          |            |
| <i>Valeriana rubra</i> L.                                   | Caprifoliaceae   | Syn      | Syn  | Acc  | Syn | Syn | Syn  | Syn | 8        | 1 | 1 | 1 | 1 | 1 | 1 | 1 |                |        | I          |            |
| <i>Valerianella abyssinica</i> Fresen.                      | Caprifoliaceae   | Syn      | NL   | Acc  | Syn | Acc | Acc  | Syn | 0        |   |   | 1 | 1 |   |   |   |                |        | P          |            |
| <i>Valerianella muricata</i> (Steven ex M.Bieb.) W.H.Baxter | Caprifoliaceae   | Acc      | Acc  | Acc  | Acc | Syn | Acc  | Acc | 6        |   |   |   | 1 |   |   |   |                |        | P          |            |
| <i>Verbascum creticum</i> (L.f.) Cav.                       | Scrophulariaceae | Acc      | Acc  | Acc  | Acc | Acc | Acc  | Acc | 10       |   |   |   |   | 1 |   |   |                |        | S          |            |
| <i>Verbascum sinuatum</i> L.                                | Scrophulariaceae | Acc      | Acc  | Acc  | Acc | Acc | Acc  | Acc | 12       |   |   |   |   | 1 |   |   |                |        | S          |            |
| <i>Verbascum thapsus</i> L. subsp. <i>thapsus</i>           | Scrophulariaceae | Acc      | NL   | NL   | NL  | Acc | Acc  | Acc |          |   |   |   | 1 |   |   |   |                |        | I          |            |

| Species Name                                                 | Family           | Atlantis | Muer | POWO | WFO | COL | GBIF | TRY | POWO Syn | H | P | G | T | C | F | L | Endemic Status | Native | Non native | Ornam Crop |
|--------------------------------------------------------------|------------------|----------|------|------|-----|-----|------|-----|----------|---|---|---|---|---|---|---|----------------|--------|------------|------------|
| <i>Verbascum virgatum</i> Stokes                             | Scrophulariaceae | Acc      | Acc  | Acc  | Acc | Acc | Acc  | Acc | 11       |   | 1 | 1 | 1 | 1 |   |   |                |        | S          |            |
| <i>Verbena bonariensis</i> L.                                | Verbenaceae      | Acc      | Acc  | Acc  | Acc | Acc | Acc  | Acc | 8        |   | 1 | 1 | 1 | 1 |   |   |                |        | S          | C          |
| <i>Verbena officinalis</i> L.                                | Verbenaceae      | Acc      | Acc  | Acc  | Acc | Acc | Acc  | Acc | 0        |   | 1 | 1 | 1 | 1 | 1 | 1 |                |        | S          | C          |
| <i>Verbena supina</i> L.                                     | Verbenaceae      | Acc      | Acc  | Acc  | Acc | Acc | Acc  | Acc | 7        |   |   |   | 1 | 1 | 1 | 1 |                |        | S          | C          |
| <i>Verbesina encelioides</i> (Cav.) Benth. & Hook. ex A.Gray | Asteraceae       | Acc      | Acc  | Acc  | Acc | Acc | Acc  | Acc | 14       |   |   |   |   | 1 |   |   |                |        | S          | O          |
| <i>Veronica agrestis</i> L.                                  | Plantaginaceae   | Acc      | Acc  | Acc  | Acc | Acc | Acc  | Acc | 12       |   |   | 1 | 1 | 1 |   |   |                |        | S          |            |
| <i>Veronica anagallis-aquatica</i> L.                        | Plantaginaceae   | Acc      | Acc  | Acc  | Acc | Acc | Acc  | Acc | 26       |   |   |   | 1 | 1 |   |   |                | P      |            |            |
| <i>Veronica arvensis</i> L.                                  | Plantaginaceae   | Acc      | Acc  | Acc  | Acc | Acc | Acc  | Acc | 19       | 1 | 1 | 1 | 1 | 1 | 1 | 1 |                | P      |            |            |
| <i>Veronica beccabunga</i> L.                                | Plantaginaceae   | Acc      | Acc  | Acc  | Acc | Acc | Acc  | Acc | 12       |   | 1 | 1 | 1 | 1 |   |   |                | P      |            |            |
| <i>Veronica hederifolia</i> L.                               | Plantaginaceae   | Acc      | Acc  | Acc  | Acc | Acc | Acc  | Acc | 9        |   |   |   | 1 | 1 |   |   |                | P      |            |            |
| <i>Veronica persica</i> Poir.                                | Plantaginaceae   | Acc      | Acc  | Acc  | Acc | Acc | Acc  | Acc | 19       |   | 1 | 1 | 1 | 1 |   |   |                |        | P          |            |
| <i>Veronica polita</i> Fries                                 | Plantaginaceae   | Acc      | Acc  | Acc  | Acc | Acc | Acc  | Acc | 6        |   |   | 1 | 1 | 1 |   |   |                |        | P          |            |
| <i>Veronica serpyllifolia</i> L.                             | Plantaginaceae   | Acc      | Acc  | Acc  | Acc | Acc | Acc  | Acc | 26       |   |   |   | 1 |   |   |   |                | P      |            |            |
| <i>Viburnum rugosum</i> Pers.                                | Adoxaceae        | Acc      | Syn  | Acc  | Syn | Syn | Syn  | Syn | 5        | 1 | 1 | 1 | 1 | 1 |   |   | A              | S      |            |            |
| <i>Vicia aphylla</i> C. Sm. ex Buch                          | Fabaceae         | Acc      | Acc  | Acc  | Acc | Acc | Acc  | NL  | 3        | 1 | 1 | 1 | 1 | 1 |   |   | A              | S      |            |            |
| <i>Vicia articulata</i> Hornem.                              | Fabaceae         | Acc      | Acc  | Acc  | Acc | Acc | Acc  | Acc | 16       | 1 | 1 | 1 | 1 | 1 |   |   |                |        | S          |            |
| <i>Vicia benghalensis</i> L.                                 | Fabaceae         | Acc      | Acc  | Acc  | Acc | Acc | Acc  | Acc | 1        | 1 | 1 | 1 | 1 | 1 | 1 | 1 |                |        | P          |            |
| <i>Vicia chaetocalyx</i> Webb & Berthel.                     | Fabaceae         | Acc      | Acc  | Acc  | Acc | Acc | Acc  | NL  | 1        |   |   |   |   | 1 |   |   | C              | S      |            |            |
| <i>Vicia disperma</i> DC.                                    | Fabaceae         | Acc      | Acc  | Acc  | Acc | Acc | Acc  | Acc | 7        | 1 | 1 | 1 | 1 | 1 |   |   |                | P      |            |            |
| <i>Vicia ervilia</i> (L.) Willd.                             | Fabaceae         | Acc      | Acc  | Acc  | Acc | Acc | Acc  | Acc | 6        |   |   |   | 1 | 1 |   |   |                |        | P          |            |
| <i>Vicia faba</i> L.                                         | Fabaceae         | Acc      | Acc  | Acc  | Acc | Acc | Acc  | Acc | 15       |   |   |   | 1 | 1 |   |   |                |        | S          | C          |
| <i>Vicia filicaulis</i> Webb & Berthel.                      | Fabaceae         | Acc      | Acc  | Acc  | Acc | Acc | Acc  | Acc | 0        |   |   |   |   | 1 |   |   | C              | S      |            |            |
| <i>Vicia hirsuta</i> (L.) Gray                               | Fabaceae         | Acc      | Acc  | Acc  | Acc | Acc | Acc  | Acc | 15       | 1 | 1 | 1 | 1 | 1 |   | 1 |                | P      |            |            |
| <i>Vicia lens</i> (L.) Coss. & Germ.                         | Fabaceae         | Syn      | Syn  | Acc  | Syn | Syn | Syn  | Syn | 8        | 1 | 1 | 1 | 1 | 1 | 1 | 1 |                |        | S          | C          |

| Species Name                                                                      | Family      | Atlantis | Muer | POWO | WFO  | COL  | GBIF | TRY | POWO Syn | H | P | G | T | C | F | L | Endemic Status | Native | Non native | Ornam Crop |
|-----------------------------------------------------------------------------------|-------------|----------|------|------|------|------|------|-----|----------|---|---|---|---|---|---|---|----------------|--------|------------|------------|
| <i>Vicia lutea</i> L. subsp. <i>lutea</i>                                         | Fabaceae    | Acc      | NL   | Acc  | Syn  | Acc  | Acc  | Acc | 10       | 1 | 1 | 1 | 1 | 1 | 1 | 1 |                | P      |            |            |
| <i>Vicia monantha</i> Retz.                                                       | Fabaceae    | Acc      | NL   | Acc  | Acc  | Acc  | Acc  | Acc | 5        | 1 | 1 |   | 1 | 1 |   | 1 |                | P      |            |            |
| <i>Vicia nataliae</i> U.Reifenb. & U.Reifenb.                                     | Fabaceae    | Acc      | Acc  | Acc  | AmUn | AmUn | Acc  | NL  | 0        |   |   | 1 | 1 |   |   |   | A              | S      |            |            |
| <i>Vicia pannonica</i> Crantz                                                     | Fabaceae    | NL       | NL   | Acc  | Acc  | Acc  | Acc  | Acc | 11       | 1 |   |   | 1 | 1 |   |   |                |        | P          |            |
| <i>Vicia parviflora</i> Cav                                                       | Fabaceae    | Acc      | Acc  | Acc  | Acc  | Acc  | Acc  | Acc | 8        | 1 | 1 | 1 | 1 | 1 | 1 | 1 |                | P      |            |            |
| <i>Vicia pubescens</i> (DC.) Link.                                                | Fabaceae    | Acc      | Acc  | Acc  | Acc  | Acc  | Acc  | Acc | 8        | 1 | 1 | 1 | 1 | 1 | 1 |   |                | P      |            |            |
| <i>Vicia sativa</i> L. subsp. <i>sativa</i>                                       | Fabaceae    | Acc      | NL   | Acc  | Syn  | Acc  | Acc  | Acc | 55       | 1 | 1 | 1 | 1 |   |   |   |                | P      |            |            |
| <i>Vicia sativa</i> L. subsp. <i>amphicarpa</i> (Dorthes) Asch. & Graebn.         | Fabaceae    | Acc      | NL   | NL   | Acc  | Acc  | Acc  | Acc |          |   |   |   |   |   |   | 1 |                | P      |            |            |
| <i>Vicia sativa</i> L. subsp. <i>cordata</i> (Wulfen ex T. Hoppe) Asch. & Graebn. | Fabaceae    | Acc      | Syn  | NL   | Acc  | Acc  | Acc  | Acc |          |   |   |   |   |   |   | 1 |                | P      |            |            |
| <i>Vicia sativa</i> L. subsp. <i>nigra</i> (L.) Ehrh.                             | Fabaceae    | Acc      | Acc  | Acc  | Acc  | Acc  | Acc  | Acc | 43       | 1 | 1 | 1 | 1 | 1 | 1 | 1 |                | P      |            |            |
| <i>Vicia scandens</i> R.P.Murray                                                  | Fabaceae    | Acc      | Acc  | Acc  | Acc  | Acc  | Acc  | Acc | 0        |   |   |   | 1 |   |   |   | T              | P      |            |            |
| <i>Vicia tenoi</i> Marrero Rodr.                                                  | Fabaceae    | Acc      | NL   | NL   | NL   | AmUn | Acc  | NL  |          |   |   |   | 1 |   |   |   | T              | S      |            |            |
| <i>Vicia tenuifolia</i> Roth                                                      | Fabaceae    | Acc      | NL   | Acc  | Acc  | Acc  | Acc  | Acc | 3        |   |   |   |   | 1 |   |   |                |        | P          |            |
| <i>Vicia tenuifolia</i> Roth subsp. <i>dalmatica</i> (A.Kern.) Greuter            | Fabaceae    | Acc      | NL   | Syn  | Acc  | Acc  | NL   | Acc |          |   |   |   |   | 1 |   |   |                |        | P          |            |
| <i>Vicia tetrasperma</i> (L.) Schreb.                                             | Fabaceae    | Acc      | Acc  | Acc  | Acc  | Acc  | Acc  | Acc | 10       | 1 | 1 | 1 | 1 | 1 | 1 | 1 |                | P      |            |            |
| <i>Vicia villosa</i> Roth subsp. <i>villosa</i>                                   | Fabaceae    | Acc      | Acc  | Acc  | Acc  | Acc  | Acc  | Acc | 8        | 1 |   |   |   |   |   |   |                |        | P          |            |
| <i>Vicia villosa</i> Roth subsp. <i>ambigua</i> (Guss.) Kerguelen                 | Fabaceae    | Syn      | Syn  | Acc  | Acc  | Acc  | Acc  | Acc | 11       |   |   |   | 1 |   |   |   |                |        | S          |            |
| <i>Vicia villosa</i> Roth subsp. <i>varia</i> (Host) Corb.                        | Fabaceae    | Acc      | Acc  | Acc  | Acc  | Acc  | Acc  | Acc | 14       |   | 1 | 1 | 1 | 1 | 1 | 1 |                |        | P          |            |
| <i>Vicia voggenreiteriana</i> Gil, R. Mesa & M. L. Gil                            | Fabaceae    | Acc      | Acc  | Acc  | NL   | AmUn | Acc  | NL  | 0        |   |   | 1 |   |   |   |   | G              | S      |            |            |
| <i>Vicia vulcanorum</i> J.Gil & M.L.Gil                                           | Fabaceae    | Acc      | Acc  | Acc  | NL   | AmUn | Acc  | NL  | 0        |   | 1 |   |   |   | 1 | 1 | A              | S      |            |            |
| <i>Vieraea laevigata</i> (Willd.) Webb ex Sch.Bip.                                | Asteraceae  | Acc      | Acc  | Acc  | Acc  | Acc  | Acc  | Acc | 4        |   |   |   | 1 |   |   |   | T              | S      |            |            |
| <i>Vinca difformis</i> Pourr.                                                     | Apocynaceae | NL       | NL   | Acc  | Acc  | Acc  | Acc  | Acc | 1        |   | 1 |   | 1 |   |   |   |                |        | S          | O          |

| Species Name                                                           | Family          | Atlantis | Muer | POWO | WFO  | COL  | GBIF | TRY | POWO Syn | H | P | G | T | C | F | L | Endemic Status | Native | Non native | Ornam Crop |
|------------------------------------------------------------------------|-----------------|----------|------|------|------|------|------|-----|----------|---|---|---|---|---|---|---|----------------|--------|------------|------------|
| <i>Vinca major</i> L.                                                  | Apocynaceae     | Acc      | Acc  | Acc  | Acc  | Acc  | Acc  | Acc | 2        | 1 | 1 | 1 | 1 | 1 |   |   |                |        | P          | O          |
| <i>Viola anagae</i> Gilli                                              | Violaceae       | Acc      | Acc  | Acc  | AmUn | Acc  | Acc  | Acc | 0        |   |   |   | 1 |   |   |   | T              | S      |            |            |
| <i>Viola arvensis</i> Murray                                           | Violaceae       | Acc      | Acc  | Acc  | Acc  | Acc  | Acc  | Acc | 21       |   | 1 | 1 | 1 |   |   |   |                | P      |            |            |
| <i>Viola cheiranthifolia</i> Bonpl.                                    | Violaceae       | Acc      | Acc  | Acc  | AmUn | Acc  | Acc  | Acc | 3        |   |   |   | 1 |   |   |   | T              | S      |            |            |
| <i>Viola guaxarensis</i> M. Marrero, Docoito Díaz & Martín Esquivel    | Violaceae       | Acc      | NL   | NL   | NL   | AmUn | NL   | NL  |          |   |   |   | 1 |   |   |   | T              | S      |            |            |
| <i>Viola odorata</i> L.                                                | Violaceae       | Acc      | Acc  | Acc  | Acc  | Acc  | Acc  | Acc | 36       |   | 1 | 1 | 1 | 1 |   |   |                | S      |            |            |
| <i>Viola palmensis</i> (Webb & Berthel.) Sauer                         | Violaceae       | Acc      | Acc  | Acc  | AmUn | Acc  | Acc  | NL  | 2        |   | 1 |   |   |   |   |   | P              | S      |            |            |
| <i>Viola plantaginea</i> Webb ex Christ                                | Violaceae       | Acc      | NL   | Syn  | Acc  | Syn  | Syn  | Syn | 0        |   |   | 1 |   |   |   |   | G              | S      |            |            |
| <i>Viola riviniana</i> Rchb.                                           | Violaceae       | Acc      | Acc  | Acc  | Acc  | Acc  | Acc  | Acc | 13       | 1 | 1 | 1 | 1 |   |   |   |                | P      |            |            |
| <i>Viola tricolor</i> L.                                               | Violaceae       | Acc      | Acc  | Acc  | Acc  | Acc  | Acc  | Acc | 59       |   | 1 | 1 | 1 |   |   |   |                |        | S          |            |
| <i>Visnaga daucoides</i> Gaertn.                                       | Apiaceae        | Syn      | Syn  | Acc  | Syn  | Acc  | Acc  | Syn | 10       |   | 1 |   |   | 1 |   |   |                | P      |            |            |
| <i>Visnea mocanera</i> L.f.                                            | Pentaphragaceae | Acc      | Acc  | Acc  | AmUn | Acc  | Acc  | Acc | 2        | 1 | 1 | 1 | 1 | 1 | 1 |   |                | S      |            |            |
| <i>Vitis vinifera</i> L.                                               | Vitaceae        | Acc      | Acc  | Acc  | Acc  | Acc  | Acc  | Acc | 45       |   | 1 | 1 | 1 | 1 | 1 | 1 |                |        | S          | C          |
| <i>Volutaria bollei</i> (Sch.Bip. ex Bolle) A.Hansen & G.Kunkel        | Asteraceae      | Acc      | Acc  | Acc  | Acc  | Acc  | Acc  | Acc | 3        |   |   |   |   |   | 1 | 1 | A              | S      |            |            |
| <i>Volutaria canariensis</i> Wagenitz                                  | Asteraceae      | Acc      | Acc  | Acc  | Acc  | Acc  | Acc  | Acc | 0        | 1 | 1 | 1 | 1 | 1 | 1 | 1 | A              | S      |            |            |
| <i>Volutaria lippii</i> (L.) Cass.                                     | Asteraceae      | NL       | Acc  | Acc  | Acc  | Acc  | Acc  | Acc | 0        |   |   |   | 1 |   | 1 |   |                | P      |            |            |
| <i>Volutaria tubuliflora</i> (Murb.) Sennen                            | Asteraceae      | Acc      | Acc  | Acc  | Acc  | Acc  | Acc  | NL  | 4        | 1 |   |   | 1 |   | 1 | 1 |                | P      |            |            |
| <i>Wahlenbergia lobelioides</i> (L.f.) Link. subsp. <i>lobelioides</i> | Campanulaceae   | Acc      | Acc  | NL   | Syn  | AmUn | Acc  | NL  |          | 1 | 1 | 1 | 1 | 1 | 1 | 1 |                | S      |            |            |
| <i>Waltheria indica</i> L.                                             | Malvaceae       | Acc      | NL   | Acc  | Acc  | Acc  | Acc  | Acc | 20       |   | 1 |   |   |   |   |   |                |        | S          |            |
| <i>Wigandia urens</i> (Ruiz & Pav.) Kunth                              | Boraginaceae    | Syn      | Syn  | Acc  | Acc  | Acc  | Acc  | Acc | 29       |   |   |   | 1 | 1 |   |   |                |        | S          | O          |
| <i>Withania aristata</i> (Aiton) Pauquy                                | Solanaceae      | Acc      | Acc  | Acc  | Acc  | Acc  | Acc  | Acc | 2        | 1 | 1 | 1 | 1 | 1 |   |   |                | S      |            |            |
| <i>Withania frutescens</i> (L.) Pauq.                                  | Solanaceae      | Acc      | Acc  | Acc  | Acc  | Acc  | Acc  | Acc | 9        |   |   |   |   | 1 | 1 |   |                | P      |            |            |
| <i>Withania somnifera</i> (L.) Dunal.                                  | Solanaceae      | Acc      | Acc  | Acc  | Acc  | Acc  | Acc  | Acc | 20       |   | 1 | 1 | 1 | 1 |   |   |                | P      |            |            |

| Species Name                                                                                              | Family           | Atlantis | Muer | POWO | WFO | COL | GBIF | TRY | POWO Syn | H | P | G | T | C | F | L | Endemic Status | Native | Non native | Ornam Crop |
|-----------------------------------------------------------------------------------------------------------|------------------|----------|------|------|-----|-----|------|-----|----------|---|---|---|---|---|---|---|----------------|--------|------------|------------|
| <i>Wolffia arrhiza</i> (L.) Horkel ex Wimm.                                                               | Araceae          | Acc      | Acc  | Acc  | Acc | Acc | Acc  | Acc | 7        |   |   |   | 1 |   |   |   |                |        | S          |            |
| <i>Woodwardia radicans</i> (L.) Sm.                                                                       | Blechnaceae      | Acc      | Acc  | Acc  | Acc | Acc | Acc  | Acc | 4        | 1 | 1 | 1 | 1 | 1 |   |   |                | S      |            |            |
| <i>Xanthium spinosum</i> L.                                                                               | Asteraceae       | Acc      | Acc  | Acc  | Acc | Acc | Acc  | Acc | 2        |   | 1 |   | 1 | 1 | 1 | 1 |                |        | S          |            |
| <i>Xanthium strumarium</i> L. subsp. <i>strumarium</i>                                                    | Asteraceae       | Syn      | Syn  | Acc  | Acc | Acc | Acc  | Syn | 56       |   |   |   | 1 | 1 | 1 | 1 |                |        | S          |            |
| <i>Xerochrysum bracteatum</i> (Svent.) Tzvelev                                                            | Asteraceae       | Acc      | Acc  | Acc  | Acc | Acc | Acc  | Acc | 30       |   |   |   | 1 |   |   |   |                |        | S          | O          |
| <i>Youngia japonica</i> (L.) DC.                                                                          | Asteraceae       | Acc      | NL   | Acc  | Acc | Acc | Acc  | Acc | 29       |   |   |   |   | 1 |   |   |                |        | I          |            |
| <i>Zannichellia palustris</i> L.                                                                          | Potamogetonaceae | Acc      | Acc  | Acc  | Acc | Acc | Acc  | Acc | 1        |   |   | 1 | 1 | 1 | 1 |   |                | P      |            |            |
| <i>Zantedeschia aethiopica</i> (L.) Spreng.                                                               | Araceae          | Acc      | Acc  | Acc  | Acc | Acc | Acc  | Acc | 8        |   | 1 | 1 | 1 | 1 | 1 | 1 |                |        | S          | O          |
| <i>Zea mays</i> L.                                                                                        | Poaceae          | Acc      | Acc  | Acc  | Acc | Acc | Acc  | Acc | 5        | 1 | 1 | 1 | 1 | 1 | 1 | 1 |                |        | S          | C          |
| <i>Zostera noltii</i> Hornemann                                                                           | Zosteraceae      | Acc      | NL   | Acc  | Acc | Acc | Acc  | Acc | 10       |   |   |   |   | 1 | 1 | 1 |                | S      |            |            |
| <i>Zoysia matrella</i> (L.) Merr.                                                                         | Poaceae          | Acc      | Acc  | Acc  | Acc | Acc | Acc  | Acc | 4        |   | 1 |   |   |   |   |   |                | P      |            |            |
| <i>Zygophyllum creticum</i> (L.) Christenh. & Byng                                                        | Zygophyllaceae   | Syn      | Syn  | Acc  | Syn | Syn | Syn  | Syn | 8        | 1 | 1 | 1 | 1 | 1 | 1 | 1 |                | P      |            |            |
| <i>Zygophyllum fontanesii</i> Webb & Berthel.                                                             | Zygophyllaceae   | Syn      | Syn  | Acc  | Syn | Syn | Syn  | Syn | 2        | 1 |   | 1 | 1 | 1 | 1 | 1 |                | S      |            |            |
| <i>Zygophyllum gaetulum</i> Emb. & Maire subsp. <i>gaetulum</i>                                           | Zygophyllaceae   | Syn      | NL   | NL   | NL  | NL  | Syn  | NL  |          |   |   |   |   | 1 | 1 |   |                | S      |            |            |
| <i>Zygophyllum gaetulum</i> Emb. & Maire subsp. <i>waterlotii</i> (Maire) Dobignard, Jacquemoud & D.Jord. | Zygophyllaceae   | Syn      | Syn  | Acc  | Syn | Syn | Syn  | NL  | 2        |   |   |   |   | 1 |   |   |                | S      |            |            |

## 2 Species Level Only

| Species Name                                                            | Family        | Atlantis | Muer | POWO | WFO | COL | GBIF | TRY | POWO Syn | H | P | G | T | C | F | L | Endemic Status | Native | Non native | Ornam Crop |
|-------------------------------------------------------------------------|---------------|----------|------|------|-----|-----|------|-----|----------|---|---|---|---|---|---|---|----------------|--------|------------|------------|
| <i>Aaronsohnia pubescens</i> (Desf.) K.Bremer & Humphries               | Asteraceae    | Acc      | NL   | Acc  | Acc | Acc | Acc  | Acc | 3        |   |   |   |   |   | 1 | 1 |                | P      |            |            |
| <i>Abutilon grandifolium</i> (Willd.) Sweet                             | Malvaceae     | Acc      | Syn  | Acc  | Acc | Acc | Acc  | Acc | 10       | 1 | 1 | 1 | 1 | 1 |   | 1 |                |        | I          | O          |
| <i>Acacia cyclops</i> G. Don                                            | Fabaceae      | Acc      | Acc  | Acc  | Acc | Acc | Acc  | Acc | 3        |   | 1 |   | 1 | 1 | 1 | 1 |                |        | I          | O          |
| <i>Acacia dealbata</i> Link                                             | Fabaceae      | Acc      | Acc  | Acc  | Acc | Acc | Acc  | Acc | 3        | 1 | 1 |   | 1 |   |   |   |                |        | S          | O          |
| <i>Acacia decurrens</i> (J.C.Wendl.) Willd.                             | Fabaceae      | NL       | NL   | Acc  | Acc | Acc | Acc  | Acc | 11       |   |   |   | 1 |   |   |   |                |        | S          | O          |
| <i>Acacia mearnsii</i> De Wild.                                         | Fabaceae      | Acc      | NL   | Acc  | Acc | Acc | Acc  | Acc | 1        |   |   |   | 1 |   |   |   |                |        | S          | O          |
| <i>Acacia melanoxylon</i> R.Br.                                         | Fabaceae      | Acc      | Acc  | Acc  | Acc | Acc | Acc  | Acc | 6        |   |   |   | 1 |   |   |   |                |        | I          | O          |
| <i>Acacia salicina</i> Lindl.                                           | Fabaceae      | Acc      | Acc  | Acc  | Acc | Acc | Acc  | Acc | 4        |   |   |   | 1 |   | 1 |   |                |        | I          | O          |
| <i>Acacia saligna</i> (Labill.) Wendl.                                  | Fabaceae      | Acc      | Acc  | Acc  | Acc | Acc | Acc  | Acc | 5        |   | 1 | 1 | 1 | 1 | 1 | 1 |                |        | I          | O          |
| <i>Acanthus mollis</i> L.                                               | Acanthaceae   | Acc      | Acc  | Acc  | Acc | Acc | Acc  | Acc | 5        |   | 1 | 1 | 1 | 1 |   |   |                |        | S          | O          |
| <i>Acer campestre</i> L.                                                | Sapindaceae   | Acc      | Acc  | Acc  | Acc | Acc | Acc  | Acc | 52       |   |   |   | 1 |   |   |   |                |        | S          | O          |
| <i>Acer pseudoplatanus</i> L.                                           | Sapindaceae   | Acc      | Acc  | Acc  | Acc | Acc | Acc  | Acc | 17       |   |   |   |   | 1 |   |   |                |        | S          | O          |
| <i>Achillea maritima</i> (L.) Ehrend. & Y.P.Guo                         | Asteraceae    | Acc      | Acc  | Acc  | Acc | Acc | Syn  | Acc | 6        |   |   |   |   | 1 |   | 1 |                | P      |            |            |
| <i>Achillea millefolium</i> L.                                          | Asteraceae    | Acc      | Acc  | Acc  | Acc | Acc | Acc  | Acc | 128      |   |   |   |   |   | 1 |   |                |        | S          |            |
| <i>Achyranthes aspera</i> L.                                            | Amaranthaceae | Acc      | Acc  | Acc  | Acc | Acc | Acc  | Acc | 19       | 1 | 1 | 1 | 1 | 1 | 1 |   |                |        | S          |            |
| <i>Acokanthera oblongifolia</i> (Hochst.) Benth. & Hook.f. ex B.D.Jacks | Apocynaceae   | NL       | NL   | Acc  | Acc | Acc | Acc  | Acc | 5        |   | 1 | 1 | 1 | 1 | 1 |   |                |        | S          |            |
| <i>Adenocarpus foliolosus</i> (Aiton) DC.                               | Fabaceae      | Acc      | NL   | Acc  | Acc | Acc | Acc  | Acc | 2        | 1 | 1 | 1 | 1 | 1 |   |   | A              | S      |            |            |
| <i>Adenocarpus ombriosus</i> Ceballos & Ortuno                          | Fabaceae      | Acc      | Acc  | Acc  | Acc | Acc | Acc  | NL  | 0        | 1 |   |   |   |   |   |   | H              | S      |            |            |
| <i>Adenocarpus viscosus</i> (Willd.) Webb & Berthel.                    | Fabaceae      | Acc      | NL   | Acc  | Acc | Acc | Acc  | Acc | 8        |   | 1 | 1 | 1 |   |   |   | A              | S      |            |            |
| <i>Adiantum capillus-veneris</i> L.                                     | Pteridaceae   | Acc      | Acc  | Acc  | Acc | Acc | Acc  | Acc | 34       | 1 | 1 | 1 | 1 | 1 | 1 | 1 |                | P      |            |            |
| <i>Adiantum hispidulum</i> Sw.                                          | Pteridaceae   | Acc      | Acc  | Acc  | Acc | Acc | Acc  | Acc | 16       |   |   |   | 1 | 1 |   |   |                |        | S          |            |



| Species Name                                         | Family        | Atlantis | Muer | POWO | WFO | COL  | GBIF | TRY | POWO Syn | H | P | G | T | C | F | L | Endemic Status | Native | Non native | Ornam Crop |
|------------------------------------------------------|---------------|----------|------|------|-----|------|------|-----|----------|---|---|---|---|---|---|---|----------------|--------|------------|------------|
| <i>Adiantum raddianum</i> C. Presl                   | Pteridaceae   | Acc      | Acc  | Acc  | Acc | Acc  | Acc  | Acc | 16       |   | 1 |   | 1 | 1 |   |   |                |        | S          |            |
| <i>Adiantum reniforme</i> L.                         | Pteridaceae   | Acc      | Acc  | Acc  | Acc | Acc  | Acc  | Acc | 0        | 1 | 1 | 1 | 1 | 1 | 1 | 1 |                | S      |            |            |
| <i>Adonis microcarpa</i> DC.                         | Ranunculaceae | Acc      | Acc  | Acc  | Acc | Acc  | Acc  | Acc | 1        |   | 1 |   | 1 | 1 | 1 | 1 |                |        | P          |            |
| <i>Aegilops biuncialis</i> Vis.                      | Poaceae       | Acc      | Syn  | Acc  | Syn | Acc  | Acc  | Syn | 15       |   |   | 1 |   |   |   |   |                | P      |            |            |
| <i>Aegilops geniculata</i> Roth                      | Poaceae       | Acc      | Acc  | Acc  | Acc | Acc  | Acc  | Acc | 22       |   | 1 | 1 | 1 |   |   | 1 |                | P      |            |            |
| <i>Aegilops neglecta</i> Req. ex Bertol.             | Poaceae       | Acc      | Acc  | Acc  | Acc | Acc  | Acc  | Acc | 27       |   |   |   | 1 |   |   | 1 |                | P      |            |            |
| <i>Aeonium aizoon</i> (Bolle) T.H.M.Mes              | Crassulaceae  | Acc      | Acc  | Acc  | Acc | Acc  | Acc  | NL  | 2        |   |   |   | 1 |   |   |   | T              | S      |            |            |
| <i>Aeonium appendiculatum</i> Bañares                | Crassulaceae  | Acc      | Acc  | Acc  | Acc | Acc  | Acc  | NL  | 0        |   |   | 1 |   |   |   |   | G              | S      |            |            |
| <i>Aeonium arboreum</i> Webb & Berthel.              | Crassulaceae  | Acc      | Acc  | Acc  | Acc | Acc  | Acc  | Acc | 4        | 1 | 1 | 1 | 1 | 1 |   |   | A              | S      |            |            |
| <i>Aeonium aureum</i> (C.Sm. ex Hornem.) T.H.M.Mes   | Crassulaceae  | Acc      | Acc  | Acc  | Acc | Acc  | Acc  | Acc | 6        |   | 1 | 1 | 1 | 1 |   |   | A              | S      |            |            |
| <i>Aeonium balsamiferum</i> Webb & Berthel.          | Crassulaceae  | Acc      | Acc  | Acc  | Acc | Acc  | Acc  | NL  | 1        |   |   |   |   |   | 1 | 1 | A              | S      |            |            |
| <i>Aeonium canariense</i> (L.) Webb & Berthel.       | Crassulaceae  | Acc      | Acc  | Acc  | Acc | Acc  | Acc  | Acc | 2        |   |   |   | 1 |   |   |   | T              | S      |            |            |
| <i>Aeonium castello-paivae</i> Bolle                 | Crassulaceae  | Acc      | Acc  | Acc  | Acc | Acc  | Acc  | NL  | 3        |   |   | 1 |   |   |   |   | G              | S      |            |            |
| <i>Aeonium ciliatum</i> (Willd.) Webb & Berthel.     | Crassulaceae  | Acc      | Acc  | Acc  | Acc | Acc  | Acc  | NL  | 2        |   |   |   | 1 |   |   |   | T              | S      |            |            |
| <i>Aeonium cuneatum</i> Webb & Berthel.              | Crassulaceae  | Acc      | Acc  | Acc  | Acc | Acc  | Acc  | Acc | 2        |   |   |   | 1 |   |   |   | T              | S      |            |            |
| <i>Aeonium davidbramwellii</i> H.Y.Liu               | Crassulaceae  | Acc      | Acc  | Acc  | Acc | Acc  | Acc  | Acc | 1        |   | 1 |   |   |   |   |   | P              | S      |            |            |
| <i>Aeonium decorum</i> Webb ex Bolle                 | Crassulaceae  | Acc      | Acc  | Acc  | Acc | Acc  | Acc  | Acc | 2        |   |   | 1 |   |   |   |   | G              | S      |            |            |
| <i>Aeonium diplocyclum</i> (Webb ex Bolle) T.H.M.Mes | Crassulaceae  | Acc      | Acc  | Acc  | Acc | Acc  | Acc  | Acc | 2        | 1 | 1 | 1 |   |   |   |   | A              | S      |            |            |
| <i>Aeonium dodrantale</i> (Willd.) T.H.M.Mes         | Crassulaceae  | Acc      | Syn  | Acc  | Acc | AmUn | Acc  | NL  | 4        |   |   |   | 1 |   |   |   | T              | S      |            |            |
| <i>Aeonium gomerense</i> (Praeger) Praeger           | Crassulaceae  | Acc      | Acc  | Acc  | Acc | Acc  | Acc  | NL  | 1        |   |   | 1 |   |   |   |   | G              | S      |            |            |
| <i>Aeonium goochiae</i> Webb & Berthel.              | Crassulaceae  | Acc      | Acc  | Acc  | Acc | Acc  | Acc  | Acc | 2        |   | 1 |   |   |   |   |   | P              | S      |            |            |
| <i>Aeonium haworthii</i> Webb & Berthel.             | Crassulaceae  | Acc      | Acc  | Acc  | Acc | Acc  | Acc  | Acc | 0        |   | 1 |   | 1 |   |   |   | A              | S      |            |            |
| <i>Aeonium hierrense</i> (R.P.Murray) Pit. & Proust. | Crassulaceae  | Acc      | Acc  | Acc  | Acc | Acc  | Acc  | Acc | 1        | 1 | 1 |   |   |   |   |   | A              | S      |            |            |
| <i>Aeonium lancerottense</i> (Praeger) Praeger       | Crassulaceae  | Acc      | Acc  | Acc  | Acc | Acc  | Acc  | NL  | 1        |   |   |   |   |   |   | 1 | L              | S      |            |            |

| Species Name                                              | Family         | Atlantis | Muer | POWO | WFO | COL  | GBIF | TRY | POWO Syn | H | P | G | T | C | F | L | Endemic Status | Native | Non native | Ornam Crop |
|-----------------------------------------------------------|----------------|----------|------|------|-----|------|------|-----|----------|---|---|---|---|---|---|---|----------------|--------|------------|------------|
| <i>Aeonium lindleyi</i> Webb & Berthel.                   | Crassulaceae   | Acc      | Acc  | Acc  | Acc | Acc  | Acc  | Acc | 2        |   |   |   | 1 |   |   |   | T              | S      |            |            |
| <i>Aeonium liui</i> Arango                                | Crassulaceae   | Acc      | NL   | NL   | NL  | AmUn | Acc  | NL  |          |   |   |   | 1 |   |   |   | T              | S      |            |            |
| <i>Aeonium mascaense</i> Bramwell                         | Crassulaceae   | Acc      | Acc  | Acc  | Acc | Acc  | Acc  | NL  | 0        |   |   |   | 1 |   |   |   | T              | S      |            |            |
| <i>Aeonium nobile</i> (Praeger) Praeger                   | Crassulaceae   | Acc      | Acc  | Acc  | Acc | Acc  | Acc  | Acc | 1        |   | 1 |   |   |   |   |   | P              | S      |            |            |
| <i>Aeonium palmense</i> Webb ex Christ                    | Crassulaceae   | Syn      | Syn  | Acc  | Syn | Syn  | Syn  | NL  | 6        | 1 | 1 |   |   |   |   |   | A              | S      |            |            |
| <i>Aeonium percarneum</i> (R.P.Murray) Pit. & Proust.     | Crassulaceae   | Acc      | Acc  | Acc  | Acc | Acc  | Acc  | Acc | 3        |   |   |   |   | 1 |   |   | C              | S      |            |            |
| <i>Aeonium pseudourbicum</i> Banares                      | Crassulaceae   | Acc      | Acc  | Acc  | Syn | Acc  | Acc  | Syn | 0        |   |   |   | 1 |   |   |   | T              | S      |            |            |
| <i>Aeonium rubrolineatum</i> Svent.                       | Crassulaceae   | NL       | Syn  | Acc  | Syn | Syn  | Syn  | NL  | 1        |   |   | 1 |   |   |   |   | G              | S      |            | O          |
| <i>Aeonium saundersii</i> Bolle                           | Crassulaceae   | Acc      | Acc  | Acc  | Acc | Acc  | Acc  | NL  | 2        |   |   | 1 |   |   |   |   | G              | S      |            |            |
| <i>Aeonium sedifolium</i> (Webb ex Bolle) Pit. & Proust.  | Crassulaceae   | Acc      | Acc  | Acc  | Acc | Acc  | Acc  | Acc | 3        |   | 1 | 1 | 1 |   |   |   | A              | S      |            |            |
| <i>Aeonium simsii</i> (Sweet) Stearn                      | Crassulaceae   | Acc      | Acc  | Acc  | Acc | Acc  | Acc  | Acc | 6        |   |   |   |   | 1 |   |   | C              | S      |            |            |
| <i>Aeonium smithii</i> (Sims) Webb & Berthel.             | Crassulaceae   | Acc      | Acc  | Acc  | Acc | Acc  | Acc  | Acc | 2        |   |   |   | 1 |   |   |   | T              | S      |            |            |
| <i>Aeonium spathulatum</i> (Hornem.) Praeger              | Crassulaceae   | Acc      | Acc  | Acc  | Acc | Acc  | Acc  | Acc | 9        | 1 | 1 | 1 | 1 | 1 |   |   | A              | S      |            |            |
| <i>Aeonium tabuliforme</i> (Haw.) Webb & Berthel.         | Crassulaceae   | Acc      | Syn  | Acc  | Acc | AmUn | Acc  | Acc | 9        |   |   |   | 1 |   |   |   | T              | S      |            |            |
| <i>Aeonium undulatum</i> Webb & Berthel.                  | Crassulaceae   | Acc      | Acc  | Acc  | Acc | Acc  | Acc  | Acc | 3        |   |   |   |   | 1 |   |   | C              | S      |            |            |
| <i>Aeonium urbicum</i> (C.Sm. ex Hornem.) Webb & Berthel. | Crassulaceae   | Acc      | NL   | Acc  | Acc | Acc  | Acc  | Acc | 2        |   |   |   | 1 |   |   |   | T              | S      |            |            |
| <i>Aeonium valverdense</i> (Praeger) Praeger              | Crassulaceae   | Acc      | Acc  | Acc  | Acc | Acc  | Acc  | NL  | 1        | 1 |   |   |   |   |   |   | H              | S      |            |            |
| <i>Aeonium virgineum</i> Webb ex Christ                   | Crassulaceae   | Syn      | Syn  | Acc  | Syn | Acc  | Syn  | NL  | 3        |   |   |   |   | 1 |   |   | C              | S      |            |            |
| <i>Aeonium volkeri</i> E.Hern. & Bañares                  | Crassulaceae   | Acc      | Acc  | Acc  | Acc | Acc  | Acc  | NL  | 0        |   |   |   | 1 |   |   |   | T              | S      |            |            |
| <i>Agapanthus praecox</i> Willd.                          | Amaryllidaceae | Acc      | Acc  | Acc  | Acc | Acc  | Acc  | Acc | 1        |   |   | 1 | 1 | 1 |   |   |                |        | S          | O          |
| <i>Agave americana</i> L.                                 | Asparagaceae   | Acc      | Acc  | Acc  | Acc | Acc  | Acc  | Acc | 2        | 1 | 1 | 1 | 1 | 1 | 1 | 1 |                |        | I          | O          |
| <i>Agave angustifolia</i> Haw.                            | Asparagaceae   | Acc      | NL   | Acc  | Acc | Acc  | Acc  | NL  | 0        |   |   |   | 1 | 1 | 1 |   |                |        | S          | O          |
| <i>Agave attenuata</i> Salm-Dyck                          | Asparagaceae   | Acc      | Acc  | Acc  | Acc | Acc  | Acc  | Acc | 0        |   | 1 | 1 | 1 | 1 | 1 | 1 |                |        | S          | O          |
| <i>Agave filifera</i> Salm-Dyck                           | Asparagaceae   | Acc      | NL   | Acc  | Acc | Acc  | Acc  | Acc | 4        |   |   |   | 1 | 1 |   |   |                |        | I          | O          |

| Species Name                                            | Family          | Atlantis | Muer | POWO | WFO | COL  | GBIF | TRY | POWO Syn | H | P | G | T | C | F | L | Endemic Status | Native | Non native | Ornam Crop |
|---------------------------------------------------------|-----------------|----------|------|------|-----|------|------|-----|----------|---|---|---|---|---|---|---|----------------|--------|------------|------------|
| <i>Agave fourcroydes</i> Lem.                           | Asparagaceae    | Acc      | Acc  | Acc  | Acc | Acc  | Acc  | Acc | 2        |   | 1 | 1 | 1 | 1 | 1 | 1 |                |        | I          | O          |
| <i>Agave lechuguilla</i> Torr.                          | Asparagaceae    | Acc      | NL   | Acc  | Acc | AmUn | Acc  | Acc | 5        |   |   | 1 |   | 1 |   |   |                |        | S          | O          |
| <i>Agave macroacantha</i> Zucc.                         | Asparagaceae    | Acc      | NL   | Acc  | Acc | Acc  | Acc  | Acc | 10       |   | 1 |   | 1 | 1 | 1 |   |                |        | S          | O          |
| <i>Agave murpheyi</i> F.Gibson                          | Asparagaceae    | Acc      | NL   | Acc  | Acc | Acc  | Acc  | Acc | 0        |   |   |   |   | 1 |   |   |                |        | I          | O          |
| <i>Agave oteroi</i> G.D.Starr & TJ Davis                | Asparagaceae    | Acc      | NL   | Acc  | NL  | AmUn | Acc  | NL  | 0        |   |   |   |   | 1 |   |   |                |        | S          | O          |
| <i>Agave salmiana</i> Otto ex Salm-Dyck                 | Asparagaceae    | Acc      | NL   | Acc  | Acc | Acc  | Acc  | Acc | 0        |   |   | 1 | 1 | 1 |   |   |                |        | S          | O          |
| <i>Agave sisalana</i> Perrine                           | Asparagaceae    | Acc      | Acc  | Acc  | Acc | Acc  | Acc  | Acc | 5        | 1 | 1 |   | 1 | 1 | 1 | 1 |                |        | I          | O          |
| <i>Agave tequilana</i> F.A.C.Weber                      | Asparagaceae    | NL       | NL   | Acc  | Acc | Acc  | Acc  | Acc | 5        |   |   |   | 1 | 1 |   |   |                |        | I          | O          |
| <i>Agave vivipara</i> L.                                | Asparagaceae    | Acc      | NL   | Acc  | Acc | Acc  | Acc  | Acc | 1        |   |   |   |   | 1 |   |   |                |        | I          | O          |
| <i>Ageratina adenophora</i> (Spreng.) R.M.King & H.Rob. | Asteraceae      | Acc      | Acc  | Acc  | Acc | Acc  | Acc  | Acc | 5        | 1 | 1 | 1 | 1 | 1 | 1 |   |                |        | I          | O          |
| <i>Ageratina riparia</i> (Regel) R.M.King & H.Rob.      | Asteraceae      | Acc      | Acc  | Acc  | Acc | Acc  | Acc  | Acc | 6        |   | 1 | 1 | 1 |   |   |   |                |        | I          | O          |
| <i>Ageratum houstonianum</i> Mill.                      | Asteraceae      | Acc      | Acc  | Acc  | Acc | Acc  | Acc  | Acc | 19       |   |   |   | 1 |   |   |   |                |        | S          | O          |
| <i>Agrimonia eupatoria</i> L.                           | Rosaceae        | Acc      | Acc  | Acc  | Acc | Acc  | Acc  | Acc | 16       |   |   | 1 | 1 |   |   |   |                | P      |            |            |
| <i>Agrostemma githago</i> L.                            | Caryophyllaceae | Acc      | Acc  | Acc  | Acc | Acc  | Acc  | Acc | 18       |   |   |   |   | 1 |   |   |                |        | P          |            |
| <i>Agrostis capillaris</i> L.                           | Poaceae         | Acc      | Acc  | Acc  | Acc | Acc  | Acc  | Acc | 70       |   | 1 |   |   |   |   |   |                | P      |            |            |
| <i>Agrostis castellana</i> Boiss. & Reut.               | Poaceae         | Acc      | Acc  | Acc  | Acc | Acc  | Acc  | Acc | 23       | 1 | 1 | 1 | 1 | 1 | 1 | 1 |                | P      |            |            |
| <i>Agrostis pourretii</i> Willd.                        | Poaceae         | Syn      | Syn  | Acc  | Acc | Acc  | Acc  | Acc | 10       |   |   |   | 1 |   |   |   |                |        | I          |            |
| <i>Agrostis stolonifera</i> L.                          | Poaceae         | Acc      | Acc  | Acc  | Acc | Acc  | Acc  | Acc | 125      |   | 1 |   |   |   |   |   |                |        | P          |            |
| <i>Aichryson bituminosum</i> Bañares                    | Crassulaceae    | Acc      | Acc  | Acc  | Acc | Acc  | Acc  | NL  | 0        |   |   |   |   | 1 |   |   | C              | S      |            |            |
| <i>Aichryson bollei</i> Webb ex Bolle                   | Crassulaceae    | Acc      | Acc  | Acc  | Acc | Acc  | Acc  | Acc | 1        |   | 1 |   |   |   |   |   | P              | S      |            |            |
| <i>Aichryson brevipetalum</i> Praeger                   | Crassulaceae    | Acc      | Acc  | Acc  | Acc | Acc  | Acc  | NL  | 0        |   | 1 |   |   |   |   |   | P              | S      |            |            |
| <i>Aichryson dichotomum</i> (DC.) Webb & Berthel.       | Crassulaceae    | NL       | NL   | Acc  | Syn | Syn  | Acc  | NL  | 3        |   |   | 1 | 1 |   |   |   | A              | S      |            |            |
| <i>Aichryson laxum</i> (Haw.) Bramwell                  | Crassulaceae    | Acc      | Acc  | Acc  | Acc | Acc  | Acc  | Acc | 4        | 1 | 1 | 1 | 1 | 1 | 1 |   | A              | S      |            |            |
| <i>Aichryson pachycaulon</i> Bolle                      | Crassulaceae    | Acc      | Acc  | Acc  | Acc | Acc  | Acc  | Acc | 1        |   | 1 | 1 | 1 | 1 | 1 |   | A              | S      |            |            |

| Species Name                                                | Family         | Atlantis | Muer | POWO | WFO | COL  | GBIF | TRY | POWO Syn | H | P | G | T | C | F | L | Endemic Status | Native | Non native | Ornam Crop |
|-------------------------------------------------------------|----------------|----------|------|------|-----|------|------|-----|----------|---|---|---|---|---|---|---|----------------|--------|------------|------------|
| <i>Aichryson palmense</i> Webb ex Bolle                     | Crassulaceae   | Acc      | Acc  | Acc  | Acc | Acc  | Acc  | Acc | 0        |   | 1 |   |   |   |   |   | P              | S      |            |            |
| <i>Aichryson parlatorei</i> Bolle                           | Crassulaceae   | Acc      | Acc  | Acc  | Acc | Acc  | Acc  | Acc | 1        | 1 | 1 | 1 | 1 | 1 |   |   | A              | S      |            |            |
| <i>Aichryson porphyrogenetos</i> Bolle                      | Crassulaceae   | Acc      | Acc  | Acc  | Acc | Acc  | Acc  | NL  | 1        |   |   |   |   | 1 |   |   | C              | S      |            |            |
| <i>Aichryson punctatum</i> (C.Sm. ex Link) Webb & Berthel.  | Crassulaceae   | Acc      | Acc  | Acc  | Acc | Acc  | Acc  | Acc | 5        | 1 | 1 | 1 | 1 | 1 | 1 |   | A              | S      |            |            |
| <i>Aichryson roseum</i> Bañares                             | Crassulaceae   | Acc      | NL   | Acc  | NL  | Acc  | Acc  | NL  | 0        |   |   |   |   | 1 |   |   | C              | S      |            |            |
| <i>Aichryson tortuosum</i> (Aiton) Webb & Berthel.          | Crassulaceae   | Acc      | Acc  | Acc  | Acc | Acc  | Acc  | NL  | 9        |   |   |   |   |   |   | 1 | L              | S      |            |            |
| <i>Ailanthus altissima</i> (Mill.) Swingle                  | Simaroubaceae  | Acc      | Acc  | Acc  | Acc | Acc  | Acc  | Acc | 27       |   |   |   | 1 | 1 |   |   |                |        | I          | O          |
| <i>Aira caryophyllea</i> L.                                 | Poaceae        | Acc      | Acc  | Acc  | Acc | Acc  | Acc  | Acc | 41       | 1 | 1 | 1 | 1 | 1 | 1 | 1 |                | P      |            |            |
| <i>Aira cupaniana</i> Guss.                                 | Poaceae        | Acc      | Acc  | Acc  | Acc | Acc  | Acc  | Acc | 6        |   |   |   | 1 |   | 1 | 1 |                | P      |            |            |
| <i>Aira elegans</i> Willd. ex Roem. & Schult.               | Poaceae        | Acc      | Syn  | Acc  | NL  | Acc  | Acc  | NL  | 16       |   |   | 1 |   |   |   |   |                | P      |            |            |
| <i>Aira praecox</i> L.                                      | Poaceae        | Acc      | Acc  | Acc  | Acc | Acc  | Acc  | Acc | 14       |   |   |   | 1 |   |   |   |                | P      |            |            |
| <i>Aizoanthemopsis hispanica</i> (L.) Klak                  | Aizoaceae      | Acc      | Syn  | Acc  | NL  | Acc  | Acc  | NL  | 3        |   |   | 1 |   |   | 1 | 1 |                | P      |            |            |
| <i>Aizoon canariense</i> L.                                 | Aizoaceae      | Acc      | Acc  | Acc  | Acc | Acc  | Acc  | Acc | 5        | 1 | 1 | 1 | 1 | 1 | 1 | 1 |                | S      |            |            |
| <i>Ajuga iva</i> (L.) Schreb.                               | Lamiaceae      | Acc      | Syn  | Acc  | Acc | Acc  | Acc  | Acc | 16       | 1 | 1 | 1 | 1 | 1 | 1 | 1 |                | P      |            |            |
| <i>Ajuga reptans</i> L.                                     | Lamiaceae      | NL       | NL   | Acc  | Acc | Acc  | Acc  | Acc | 13       |   | 1 |   |   |   |   |   |                |        | S          |            |
| <i>Alcea rosea</i> L.                                       | Malvaceae      | Acc      | Acc  | Acc  | Acc | Acc  | Acc  | Acc | 17       |   |   |   | 1 | 1 | 1 |   |                |        | S          | O          |
| <i>Alchemilla microcarpa</i> Boiss. & Reut.                 | Rosaceae       | Syn      | Syn  | Acc  | Syn | Syn  | Syn  | NL  | 1        | 1 | 1 | 1 | 1 | 1 |   |   |                | P      |            |            |
| <i>Alisma lanceolatum</i> With.                             | Alismataceae   | Acc      | Acc  | Acc  | Acc | Acc  | Acc  | Acc | 2        |   |   |   |   | 1 |   |   |                | P      |            |            |
| <i>Allagopappus canariensis</i> (Willd.) Greuter            | Asteraceae     | Acc      | Acc  | Acc  | Acc | Acc  | Acc  | Acc | 7        |   |   | 1 | 1 | 1 |   |   | A              | S      |            |            |
| <i>Allagopappus viscosissimus</i> Bolle                     | Asteraceae     | Acc      | Acc  | Acc  | Acc | Acc  | Acc  | NL  | 1        |   |   |   |   | 1 |   |   | C              | S      |            |            |
| <i>Allium ampeloprasum</i> L.                               | Amaryllidaceae | Acc      | Acc  | Acc  | Acc | Acc  | Acc  | Acc | 32       |   | 1 |   | 1 | 1 |   | 1 |                |        | P          |            |
| <i>Allium canariense</i> (Regel) N.Friesen & P. Schönfelder | Amaryllidaceae | Acc      | Acc  | Acc  | NL  | Acc  | Acc  | NL  | 1        | 1 | 1 | 1 | 1 | 1 | 1 | 1 | A              | S      |            |            |
| <i>Allium neapolitanum</i> Cirillo                          | Amaryllidaceae | Syn      | Syn  | Acc  | Acc | AmUn | Acc  | Acc | 17       |   |   |   | 1 |   |   |   |                | P      |            |            |

| Species Name                                              | Family           | Atlantis | Muer | POWO | WFO | COL | GBIF | TRY | POWO Syn | H | P | G | T | C | F | L | Endemic Status | Native | Non native | Ornam Crop |
|-----------------------------------------------------------|------------------|----------|------|------|-----|-----|------|-----|----------|---|---|---|---|---|---|---|----------------|--------|------------|------------|
| <i>Allium nigrum</i> L.                                   | Amaryllidaceae   | Acc      | Acc  | Acc  | Acc | Acc | Acc  | Acc | 13       |   |   |   | 1 | 1 |   |   |                |        | P          |            |
| <i>Allium paniculatum</i> L.                              | Amaryllidaceae   | Acc      | Acc  | Acc  | Acc | Acc | Acc  | Acc | 4        |   | 1 |   | 1 | 1 |   |   |                | P      |            |            |
| <i>Allium rotundum</i> L.                                 | Amaryllidaceae   | Acc      | Acc  | Acc  | Acc | Acc | Acc  | Acc | 26       |   |   |   | 1 | 1 |   |   |                | P      |            |            |
| <i>Allium sphaerocephalon</i> L.                          | Amaryllidaceae   | Syn      | Acc  | Acc  | Acc | Acc | Acc  | Acc | 1        |   |   |   | 1 |   |   |   |                | P      |            |            |
| <i>Allium vineale</i> L.                                  | Amaryllidaceae   | Acc      | Acc  | Acc  | Acc | Acc | Acc  | Acc | 18       |   | 1 |   | 1 | 1 | 1 | 1 |                | P      |            |            |
| <i>Aloe arborescens</i> Mill.                             | Xanthorrhoeaceae | Acc      | Acc  | Acc  | Acc | Acc | Acc  | Acc | 2        |   | 1 |   | 1 | 1 |   | 1 |                |        | S          | O          |
| <i>Aloe maculata</i> All.                                 | Xanthorrhoeaceae | Acc      | NL   | Acc  | Acc | Acc | Acc  | Acc | 0        |   | 1 |   |   | 1 | 1 |   |                |        | S          |            |
| <i>Aloe vera</i> (L.) Burm.f.                             | Xanthorrhoeaceae | Acc      | Acc  | Acc  | Acc | Acc | Acc  | Acc | 13       |   | 1 | 1 | 1 | 1 | 1 | 1 |                |        | S          | O          |
| <i>Aloiampelos ciliaris</i> (Haw.) Klopper & Gideon F.Sm. | Xanthorrhoeaceae | Syn      | Syn  | Acc  | NL  | Acc | Acc  | Acc | 1        |   |   |   | 1 | 1 |   |   |                |        | S          | O          |
| <i>Alopecurus geniculatus</i> L.                          | Poaceae          | Acc      | Acc  | Acc  | Acc | Acc | Acc  | Acc | 11       |   |   |   | 1 |   |   |   |                |        | P          |            |
| <i>Alopecurus myosuroides</i> Huds.                       | Poaceae          | Acc      | Acc  | Acc  | Acc | Acc | Acc  | Acc | 10       |   | 1 |   | 1 | 1 | 1 |   |                |        | P          |            |
| <i>Alternanthera caracasana</i> Kunth                     | Amaranthaceae    | Acc      | Acc  | Acc  | Acc | Acc | Acc  | Acc | 10       | 1 | 1 | 1 | 1 | 1 |   |   |                |        | S          |            |
| <i>Alyssum granatense</i> Boiss. & Reut.                  | Brassicaceae     | Acc      | NL   | Acc  | Acc | Acc | Acc  | Acc | 6        |   |   |   |   | 1 |   |   |                | P      |            |            |
| <i>Alyssum simplex</i> Rudolph                            | Brassicaceae     | Acc      | Syn  | Acc  | Acc | Acc | Acc  | Acc | 10       |   |   |   | 1 | 1 |   |   |                | P      |            |            |
| <i>Amaranthus albus</i> L.                                | Amaranthaceae    | Acc      | Acc  | Acc  | Acc | Acc | Acc  | Acc | 11       |   |   |   |   | 1 |   |   |                |        | S          |            |
| <i>Amaranthus blitoides</i> S.Watson                      | Amaranthaceae    | Acc      | Acc  | Acc  | Acc | Acc | Acc  | Acc | 7        |   | 1 |   | 1 | 1 | 1 | 1 |                |        | S          |            |
| <i>Amaranthus blitum</i> L.                               | Amaranthaceae    | Acc      | NL   | Acc  | Acc | Acc | Acc  | Acc | 32       | 1 | 1 | 1 | 1 | 1 | 1 | 1 |                |        | S          |            |
| <i>Amaranthus caudatus</i> L.                             | Amaranthaceae    | Acc      | Acc  | Acc  | Acc | Acc | Acc  | Acc | 13       |   |   |   | 1 | 1 |   |   |                |        | S          |            |
| <i>Amaranthus cruentus</i> L.                             | Amaranthaceae    | Acc      | Acc  | Acc  | Acc | Acc | Acc  | Acc | 29       | 1 | 1 |   | 1 | 1 |   | 1 |                |        | S          | O          |
| <i>Amaranthus deflexus</i> L.                             | Amaranthaceae    | Acc      | Acc  | Acc  | Acc | Acc | Acc  | Acc | 11       | 1 | 1 |   | 1 | 1 | 1 | 1 |                |        | S          |            |
| <i>Amaranthus graecizans</i> L.                           | Amaranthaceae    | Acc      | Acc  | Acc  | Acc | Acc | Acc  | Acc | 10       |   | 1 |   | 1 | 1 |   | 1 |                |        | S          |            |
| <i>Amaranthus hybridus</i> L.                             | Amaranthaceae    | Acc      | Acc  | Acc  | Acc | Acc | Acc  | Acc | 37       |   | 1 | 1 | 1 | 1 |   | 1 |                |        | S          |            |
| <i>Amaranthus muricatus</i> (Gillies ex Moq.) Hieron.     | Amaranthaceae    | Acc      | Acc  | Acc  | Acc | Acc | Acc  | Acc | 2        |   | 1 | 1 | 1 | 1 | 1 | 1 |                |        | S          |            |
| <i>Amaranthus powellii</i> S. Watson                      | Amaranthaceae    | Acc      | NL   | Acc  | Acc | Acc | Acc  | Acc | 9        |   |   |   | 1 |   | 1 |   |                |        | S          |            |

| Species Name                                                             | Family          | Atlantis | Muer | POWO | WFO  | COL  | GBIF | TRY | POWO Syn | H | P | G | T | C | F | L | Endemic Status | Native | Non native | Ornam Crop |
|--------------------------------------------------------------------------|-----------------|----------|------|------|------|------|------|-----|----------|---|---|---|---|---|---|---|----------------|--------|------------|------------|
| <i>Amaranthus retroflexus</i> L.                                         | Amaranthaceae   | Acc      | Acc  | Acc  | Acc  | Acc  | Acc  | Acc | 15       | 1 |   |   | 1 | 1 |   | 1 |                |        | S          |            |
| <i>Amaranthus standleyanus</i> Parodi ex Covas                           | Amaranthaceae   | Acc      | Acc  | Acc  | Acc  | Acc  | Acc  | Acc | 2        | 1 |   |   |   |   |   |   |                |        | S          |            |
| <i>Amaranthus viridis</i> L.                                             | Amaranthaceae   | Acc      | Acc  | Acc  | Acc  | Acc  | Acc  | Acc | 11       | 1 | 1 | 1 | 1 | 1 | 1 | 1 |                |        | S          |            |
| <i>Amaryllis belladonna</i> L.                                           | Amaryllidaceae  | Acc      | Acc  | Acc  | Acc  | Acc  | Acc  | Acc | 20       |   | 1 | 1 | 1 | 1 |   |   |                |        | I          | O          |
| <i>Ammi majus</i> L.                                                     | Apiaceae        | Acc      | Acc  | Acc  | Acc  | Acc  | Acc  | Acc | 37       | 1 | 1 | 1 | 1 | 1 | 1 | 1 |                | P      |            |            |
| <i>Ammi procerum</i> Lowe                                                | Apiaceae        | Acc      | Acc  | Syn  | Syn  | Acc  | Acc  | NL  | 0        |   | 1 |   |   | 1 |   |   |                | P      |            |            |
| <i>Ammochloa pungens</i> (Schreb.) Boiss.                                | Poaceae         | Acc      | Acc  | Acc  | Acc  | Acc  | Acc  | Acc | 5        |   |   |   | 1 |   |   |   |                |        | P          |            |
| <i>Ammodaucus leucotrichus</i> Coss.                                     | Apiaceae        | Syn      | Syn  | Acc  | Acc  | Acc  | Acc  | NL  | 2        |   |   |   | 1 |   | 1 |   |                | S      |            |            |
| <i>Amphilophium buccinatorium</i> (DC.) L.G.Lohmann                      | Bignoniaceae    | Syn      | Syn  | Acc  | Acc  | Acc  | Acc  | Acc | 10       |   | 1 |   |   | 1 |   |   |                |        | S          | O          |
| <i>Anacyclus clavatus</i> (Desf.) Pers.                                  | Asteraceae      | Acc      | Acc  | Acc  | Acc  | Acc  | Acc  | Acc | 18       |   | 1 |   |   |   |   | 1 |                |        | P          |            |
| <i>Anacyclus radiatus</i> Loisel.                                        | Asteraceae      | Acc      | Acc  | Acc  | Acc  | Acc  | Acc  | NL  | 0        | 1 |   | 1 | 1 |   | 1 | 1 |                | S      |            |            |
| <i>Anagyris latifolia</i> Brouss. ex Willd.                              | Fabaceae        | Acc      | Acc  | Acc  | AmUn | AmUn | Acc  | Acc | 1        |   | 1 | 1 | 1 | 1 |   |   | A              | S      |            |            |
| <i>Anastatica hierochuntica</i> L.                                       | Brassicaceae    | Acc      | Acc  | Acc  | Acc  | Acc  | Acc  | Acc | 2        |   |   |   |   |   | 1 |   |                |        | P          |            |
| <i>Anchusa azurea</i> Mill.                                              | Boraginaceae    | Acc      | Acc  | Acc  | Acc  | Acc  | Acc  | Acc | 14       | 1 | 1 | 1 | 1 | 1 | 1 | 1 |                | P      |            |            |
| <i>Andrachne telephoides</i> L.                                          | Phyllantaceae   | Acc      | Acc  | Acc  | Acc  | Acc  | Acc  | Acc | 10       |   |   |   |   | 1 | 1 |   |                |        | P          |            |
| <i>Andropogon distachyos</i> L.                                          | Poaceae         | Acc      | Acc  | Acc  | Acc  | Acc  | Acc  | Acc | 6        |   |   | 1 | 1 |   |   |   |                | P      |            |            |
| <i>Andryala integrifolia</i> L.                                          | Asteraceae      | Acc      | Acc  | Acc  | Acc  | Acc  | Acc  | Acc | 25       | 1 |   |   |   | 1 |   |   |                | P      |            |            |
| <i>Andryala perezii</i> M. Z. Ferreira, R. Jardim, Alv. Fern., & M. Seq. | Asteraceae      | Acc      | NL   | Acc  | NL   | Acc  | Acc  | NL  | 0        |   |   |   | 1 | 1 | 1 | 1 | A              | S      |            |            |
| <i>Andryala pinnatifida</i> Aiton                                        | Asteraceae      | Acc      | NL   | Acc  | Acc  | Acc  | Acc  | Acc | 0        | 1 |   | 1 | 1 | 1 |   |   |                | S      |            |            |
| <i>Andryala rothia</i> Pers.                                             | Asteraceae      | Syn      | Syn  | Acc  | Acc  | Acc  | Acc  | NL  | 7        |   | 1 |   | 1 |   |   |   | A              | S      |            |            |
| <i>Andryala webbii</i> Christ                                            | Asteraceae      | Syn      | Acc  | Acc  | Acc  | Acc  | Acc  | NL  | 1        |   | 1 | 1 |   |   |   |   | A              | S      |            |            |
| <i>Anethum graveolens</i> L.                                             | Apiaceae        | Acc      | Acc  | Acc  | Acc  | Acc  | Acc  | Acc | 20       | 1 | 1 | 1 | 1 | 1 | 1 | 1 |                |        | P          | C          |
| <i>Anogramma leptophylla</i> (L.) Link                                   | Hemionitidaceae | Acc      | Acc  | Acc  | Acc  | Acc  | Acc  | Acc | 17       | 1 | 1 | 1 | 1 | 1 | 1 | 1 |                | S      |            |            |
| <i>Anredera cordifolia</i> (Ten.) Steenis                                | Basellaceae     | Acc      | Acc  | Acc  | Acc  | Acc  | Acc  | Acc | 8        | 1 | 1 | 1 | 1 | 1 | 1 |   |                |        | I          | O          |

| Species Name                                         | Family          | Atlantis | Muer | POWO | WFO | COL | GBIF | TRY | POWO Syn | H | P | G | T | C | F | L | Endemic Status | Native | Non native | Ornam Crop |
|------------------------------------------------------|-----------------|----------|------|------|-----|-----|------|-----|----------|---|---|---|---|---|---|---|----------------|--------|------------|------------|
| <i>Anthemis arvensis</i> L.                          | Asteraceae      | Acc      | Acc  | Acc  | Acc | Acc | Acc  | Acc | 1        |   |   | 1 | 1 | 1 | 1 | 1 |                |        | P          |            |
| <i>Anthemis cotula</i> L.                            | Asteraceae      | Acc      | Acc  | Acc  | Acc | Acc | Acc  | Acc | 10       | 1 | 1 | 1 | 1 | 1 | 1 | 1 |                |        | P          |            |
| <i>Anthoxanthum aristatum</i> Boiss.                 | Poaceae         | Acc      | Acc  | Acc  | Acc | Acc | Acc  | Acc | 8        | 1 | 1 | 1 | 1 | 1 | 1 | 1 |                | P      |            |            |
| <i>Anthoxanthum odoratum</i> L.                      | Poaceae         | Acc      | Acc  | Acc  | Acc | Acc | Acc  | Acc | 9        |   | 1 |   | 1 | 1 |   |   |                | P      |            |            |
| <i>Anthriscus caucalis</i> M.Bieb.                   | Apiaceae        | Acc      | Acc  | Acc  | Acc | Acc | Acc  | Acc | 21       | 1 |   |   | 1 |   |   |   |                |        | S          |            |
| <i>Antigonon leptopus</i> Hook. & Arn.               | Polygonaceae    | Acc      | Acc  | Acc  | Acc | Acc | Acc  | Acc | 5        |   | 1 |   |   | 1 |   |   |                |        | S          |            |
| <i>Antirrhinum majus</i> L.                          | Antirrhinaceae  | Acc      | Acc  | Acc  | Acc | Acc | Acc  | Acc | 7        | 1 | 1 | 1 | 1 | 1 |   | 1 |                |        | P          | O          |
| <i>Apium graveolens</i> L.                           | Apiaceae        | Acc      | Acc  | Acc  | Acc | Acc | Acc  | Acc | 27       | 1 | 1 | 1 | 1 | 1 | 1 | 1 |                |        | P          | C          |
| <i>Apium nodiflorum</i> (L.) Lag.                    | Apiaceae        | Syn      | Acc  | Acc  | Acc | Syn | Syn  | Acc | 18       |   | 1 | 1 | 1 | 1 |   |   |                | P      |            |            |
| <i>Apium repens</i> (Jacq.) Lag.                     | Apiaceae        | Syn      | Acc  | Acc  | Acc | Syn | Syn  | Acc | 6        |   |   |   | 1 |   |   |   |                | P      |            |            |
| <i>Apteranthes burchardii</i> (N.E.Br.) Plowes       | Asclepiadaceae  | Acc      | NL   | Acc  | Syn | Acc | Syn  | NL  | 2        |   |   |   |   |   | 1 | 1 | A              | S      |            | O          |
| <i>Aquilegia vulgaris</i> L.                         | Ranunculaceae   | Acc      | Acc  | Acc  | Acc | Acc | Acc  | Acc | 28       |   |   |   | 1 |   |   |   |                |        | S          | O          |
| <i>Arabidopsis thaliana</i> (L.) Heynh.              | Brassicaceae    | Acc      | Acc  | Acc  | Acc | Acc | Acc  | Acc | 21       | 1 | 1 | 1 | 1 | 1 |   |   |                | P      |            |            |
| <i>Arabis caucasica</i> Willd.                       | Brassicaceae    | Syn      | Acc  | Acc  | Acc | Acc | Acc  | Acc | 18       | 1 | 1 | 1 | 1 | 1 |   |   |                | P      |            |            |
| <i>Arabis nova</i> Vill.                             | Brassicaceae    | Syn      | NL   | Acc  | Acc | Acc | Acc  | Acc | 11       |   | 1 |   | 1 | 1 |   |   |                | P      |            |            |
| <i>Arabis recta</i> Vill.                            | Brassicaceae    | NL       | Acc  | Acc  | Acc | Syn | Syn  | Acc | 18       |   | 1 |   | 1 | 1 |   |   |                | P      |            |            |
| <i>Arbutus canariensis</i> Duhamel                   | Auracariaceae   | Acc      | Acc  | Acc  | Acc | Acc | Acc  | Acc | 3        | 1 | 1 | 1 | 1 | 1 |   |   | A              | S      |            |            |
| <i>Arbutus unedo</i> L.                              | Ericaceae       | Acc      | Acc  | Acc  | Acc | Acc | Acc  | Acc | 13       |   |   |   | 1 | 1 |   |   |                |        | I          | O          |
| <i>Arenaria serpyllifolia</i> L.                     | Caryophyllaceae | Acc      | Acc  | Acc  | Acc | Acc | Acc  | Acc | 19       | 1 | 1 | 1 | 1 | 1 | 1 | 1 |                | P      |            |            |
| <i>Argemone mexicana</i> L.                          | Papaveraceae    | Acc      | Acc  | Acc  | Acc | Acc | Acc  | Acc | 18       |   | 1 |   | 1 | 1 |   |   |                |        | I          | O          |
| <i>Argemone ochroleuca</i> Sweet                     | Papaveraceae    | Acc      | Acc  | Acc  | Acc | Acc | Acc  | Acc | 10       |   | 1 |   | 1 | 1 |   |   |                |        | S          | O          |
| <i>Argyranthemum adauctum</i> (Link) Humphries       | Asteraceae      | Acc      | Acc  | Acc  | Acc | Acc | Acc  | Acc | 0        |   |   |   | 1 |   |   |   | T              | S      |            |            |
| <i>Argyranthemum broussonetii</i> (Pers.) Humphries  | Asteraceae      | Acc      | Acc  | Acc  | Acc | Acc | Acc  | Acc | 0        |   |   |   | 1 |   |   |   | T              | S      |            |            |
| <i>Argyranthemum callichrysum</i> (Svent.) Humphries | Asteraceae      | Acc      | Acc  | Acc  | Acc | Acc | Acc  | Acc | 1        |   |   | 1 |   |   |   |   | G              | S      |            |            |

| Species Name                                                 | Family            | Atlantis | Muer | POWO | WFO  | COL  | GBIF | TRY | POWO Syn | H | P | G | T | C | F | L | Endemic Status | Native | Non native | Ornam Crop |
|--------------------------------------------------------------|-------------------|----------|------|------|------|------|------|-----|----------|---|---|---|---|---|---|---|----------------|--------|------------|------------|
| <i>Argyranthemum callichrysum</i> (Svent.) Humphries         | Asteraceae        | Syn      | Syn  | NL   | NL   | Syn  | Syn  | NL  |          |   |   | 1 |   |   |   |   | G              | S      |            |            |
| <i>Argyranthemum coronopifolium</i> (Wild.) Webb             | Asteraceae        | Acc      | Acc  | Acc  | Acc  | Acc  | Acc  | Acc | 16       |   |   |   | 1 |   |   |   | T              | S      |            |            |
| <i>Argyranthemum escarrei</i> (Svent.) Humphries             | Asteraceae        | Acc      | Acc  | Acc  | Acc  | Acc  | Acc  | Acc | 1        |   |   |   |   | 1 |   |   | C              | S      |            |            |
| <i>Argyranthemum filifolium</i> (Sch.Bip.) Humphries         | Asteraceae        | Acc      | Acc  | Acc  | Acc  | Acc  | Acc  | NL  | 2        |   |   |   | 1 |   |   |   | T              | S      |            |            |
| <i>Argyranthemum foeniculaceum</i> (Willd.) Webb ex Sch.Bip. | Asteraceae        | Acc      | Acc  | Acc  | Acc  | Acc  | Acc  | Acc | 5        |   |   |   | 1 |   |   |   | T              | S      |            |            |
| <i>Argyranthemum frutescens</i> (L.) Sch.Bip.                | Asteraceae        | Acc      | Acc  | Acc  | Acc  | Acc  | Acc  | Acc | 3        | 1 | 1 |   | 1 | 1 |   | 1 | A              | S      |            |            |
| <i>Argyranthemum gracile</i> Webb ex Sch.Bip.                | Asteraceae        | Acc      | Acc  | Acc  | Acc  | Acc  | Acc  | Acc | 1        |   |   |   | 1 |   |   |   | T              | S      |            |            |
| <i>Argyranthemum haouarytheum</i> Humphries & Bramwell       | Asteraceae        | Acc      | Acc  | Acc  | Acc  | Acc  | Acc  | Acc | 2        |   | 1 |   |   |   |   |   | P              | S      |            |            |
| <i>Argyranthemum hierrense</i> Humphries                     | Asteraceae        | Acc      | Acc  | Acc  | Acc  | Acc  | Acc  | Acc | 0        | 1 |   |   |   |   |   |   | H              | S      |            |            |
| <i>Argyranthemum lemsii</i> Humphries                        | Asteraceae        | Acc      | Acc  | Acc  | Acc  | Acc  | Acc  | Acc | 0        |   |   |   | 1 |   |   |   | T              | S      |            |            |
| <i>Argyranthemum lidii</i> Humphries                         | Asteraceae        | Acc      | Acc  | Acc  | Acc  | Acc  | Acc  | NL  | 1        |   |   |   |   | 1 |   |   | C              | S      |            |            |
| <i>Argyranthemum maderense</i> (D.Don) Humphries             | Asteraceae        | Acc      | Acc  | Acc  | Acc  | Acc  | Acc  | Acc | 3        |   |   |   |   |   |   | 1 | L              | S      |            |            |
| <i>Argyranthemum sundingii</i> L.Borgen                      | Asteraceae        | Acc      | Acc  | Acc  | Acc  | Acc  | Acc  | NL  | 0        |   |   |   | 1 |   |   |   | T              | S      |            |            |
| <i>Argyranthemum sventenii</i> Humphries & Aldridge          | Asteraceae        | Acc      | Acc  | Acc  | Acc  | Acc  | Acc  | Acc | 0        | 1 |   |   |   |   |   |   | H              | S      |            |            |
| <i>Argyranthemum tenerifae</i> Humphries                     | Asteraceae        | Acc      | Acc  | Acc  | Acc  | Acc  | Acc  | Acc | 10       |   |   |   | 1 |   |   |   | T              | S      |            |            |
| <i>Argyranthemum vincentii</i> Santos & Fera                 | Asteraceae        | NL       | Acc  | NL   | AmUn | Acc  | Acc  | NL  |          |   |   |   | 1 |   |   |   | T              | S      |            |            |
| <i>Argyranthemum webbii</i> Sch.Bip.                         | Asteraceae        | Acc      | Acc  | Acc  | Acc  | Acc  | Acc  | Acc | 1        |   | 1 |   |   |   |   |   | P              | S      |            |            |
| <i>Argyranthemum winteri</i> (Svent.) Humphries              | Asteraceae        | Acc      | Acc  | Acc  | Acc  | Acc  | Acc  | Acc | 1        |   |   |   |   |   | 1 |   | F              | S      |            |            |
| <i>Argyrolobium armindae</i> Marrero Rodr.                   | Fabaceae          | Acc      | Acc  | Acc  | AmUn | AmUn | Acc  | NL  | 0        |   |   |   |   | 1 |   |   | C              | S      |            |            |
| <i>Aria edulis</i> (Willd.) M. Roem.                         | Rosaceae          | Syn      | Syn  | Acc  | AmUn | Acc  | Acc  | NL  | 40       |   | 1 |   | 1 |   |   |   | P              |        |            |            |
| <i>Arisarum simorrhinum</i> Durieu                           | Araceae           | Acc      | Acc  | Acc  | Acc  | Acc  | Acc  | Acc | 1        |   |   |   | 1 | 1 | 1 | 1 | S              |        |            |            |
| <i>Aristida adscensionis</i> L.                              | Poaceae           | Acc      | Acc  | Acc  | Acc  | Acc  | Acc  | Acc | 92       | 1 | 1 | 1 | 1 | 1 | 1 | 1 |                |        | P          |            |
| <i>Aristolochia paucinervis</i> Pomel                        | Aristolochinaceae | Acc      | Acc  | Acc  | Acc  | Acc  | Acc  | Acc | 0        | 1 |   |   | 1 | 1 |   |   |                |        | S          |            |



| Species Name                                                      | Family         | Atlantis | Muer | POWO | WFO | COL | GBIF | TRY | POWO Syn | H | P | G | T | C | F | L | Endemic Status | Native | Non native | Ornam Crop |
|-------------------------------------------------------------------|----------------|----------|------|------|-----|-----|------|-----|----------|---|---|---|---|---|---|---|----------------|--------|------------|------------|
| <i>Arnebia decumbens</i> (Vent.) Coss. & Kralik                   | Boraginaceae   | Acc      | Acc  | Acc  | Acc | Acc | Acc  | Acc | 14       |   |   |   | 1 | 1 | 1 | 1 |                | P      |            |            |
| <i>Arrhenatherum calderae</i> A.Hansen                            | Poaceae        | Acc      | Acc  | Acc  | Acc | Acc | Acc  | Acc | 0        |   | 1 |   | 1 |   |   |   | A              | S      |            |            |
| <i>Arrhenatherum elatius</i> (L.) P.Beauv. ex J.Presl & C.Presl.  | Poaceae        | Acc      | NL   | Acc  | Acc | Acc | Acc  | Acc | 5        | 1 | 1 |   | 1 | 1 |   | 1 |                | P      |            |            |
| <i>Artemisia ramosa</i> C.Sm. ex Link                             | Asteraceae     | Acc      | Acc  | Acc  | Acc | Acc | Acc  | Acc | 1        |   |   |   | 1 | 1 |   |   | A              | S      |            |            |
| <i>Artemisia reptans</i> C.Sm. ex Link                            | Asteraceae     | Acc      | Acc  | Acc  | Acc | Acc | Acc  | Acc | 0        |   |   |   | 1 | 1 | 1 |   |                | S      |            |            |
| <i>Artemisia thuscula</i> Cav.                                    | Asteraceae     | Acc      | Acc  | Acc  | Acc | Acc | Acc  | Acc | 3        | 1 | 1 | 1 | 1 | 1 |   |   | A              | S      |            |            |
| <i>Arthrocaulon macrostachyum</i> (Moric.) Piirainen & G.Kadereit | Chenopodiaceae | Syn      | Syn  | Acc  | NL  | Acc | Acc  | NL  | 9        |   |   |   | 1 | 1 | 1 | 1 |                | S      |            |            |
| <i>Arum italicum</i> Mill.                                        | Araceae        | Acc      | Acc  | Acc  | Acc | Acc | Acc  | Acc | 1        | 1 | 1 | 1 | 1 | 1 | 1 |   |                | P      |            |            |
| <i>Arundo donax</i> L.                                            | Poaceae        | Acc      | Acc  | Acc  | Acc | Acc | Acc  | Acc | 25       | 1 | 1 | 1 | 1 | 1 | 1 | 1 |                |        | I          | O          |
| <i>Asclepias curassavica</i> L.                                   | Asclepiadaceae | Acc      | Acc  | Acc  | Acc | Acc | Acc  | Acc | 8        |   | 1 | 1 | 1 | 1 | 1 | 1 |                |        | S          | O          |
| <i>Asparagus aethiopicus</i> L.                                   | Asparagaceae   | Acc      | Acc  | Acc  | Acc | Acc | Acc  | Acc | 5        |   |   |   | 1 | 1 |   |   |                |        | P          |            |
| <i>Asparagus albus</i> L.                                         | Asparagaceae   | NL       | NL   | Acc  | Acc | Acc | Acc  | Acc | 2        |   |   |   | 1 | 1 | 1 | 1 |                |        | S          |            |
| <i>Asparagus arborescens</i> Willd. ex Schult. & Schult.f.        | Asparagaceae   | Acc      | Acc  | Acc  | Acc | Acc | Acc  | Acc | 3        | 1 | 1 | 1 | 1 | 1 | 1 | 1 | A              | S      |            |            |
| <i>Asparagus asparagoides</i> (L.) Druce                          | Asparagaceae   | Acc      | Acc  | Acc  | Acc | Acc | Acc  | Acc | 12       | 1 | 1 | 1 | 1 | 1 |   | 1 |                |        | P          | O          |
| <i>Asparagus fallax</i> Svent.                                    | Asparagaceae   | Acc      | Acc  | Acc  | Acc | Acc | Acc  | Acc | 0        |   |   | 1 | 1 |   |   |   | A              | S      |            |            |
| <i>Asparagus horridus</i> L.                                      | Asparagaceae   | Acc      | Acc  | Acc  | Acc | Acc | Acc  | Acc | 1        |   |   |   |   |   | 1 | 1 |                | S      |            |            |
| <i>Asparagus nesioties</i> Svent.                                 | Asparagaceae   | Acc      | NL   | Acc  | Acc | Acc | Acc  | Acc | 0        |   |   |   |   |   | 1 | 1 | A              | S      |            |            |
| <i>Asparagus pastorianus</i> Webb & Berthel.                      | Asparagaceae   | Acc      | Acc  | Acc  | Acc | Acc | Acc  | Acc | 1        |   |   |   | 1 | 1 | 1 | 1 |                | S      |            |            |
| <i>Asparagus plocamoides</i> Webb ex Svent.                       | Asparagaceae   | Acc      | Acc  | Acc  | Acc | Acc | Acc  | Acc | 0        |   | 1 | 1 | 1 | 1 |   |   | A              | S      |            |            |
| <i>Asparagus scoparius</i> Lowe                                   | Asparagaceae   | Acc      | Acc  | Acc  | Acc | Acc | Acc  | Acc | 1        | 1 | 1 | 1 | 1 | 1 | 1 |   |                | S      |            |            |
| <i>Asparagus setaceus</i> (Kunth) Jessop                          | Asparagaceae   | Acc      | Acc  | Acc  | Acc | Acc | Acc  | Acc | 6        |   | 1 |   | 1 | 1 |   |   |                |        | S          |            |
| <i>Asparagus umbellatus</i> Link                                  | Asparagaceae   | Acc      | Acc  | Acc  | Acc | Acc | Acc  | Acc | 1        | 1 | 1 | 1 | 1 | 1 | 1 |   |                | S      |            |            |
| <i>Asperula gemella</i> Airy Shaw & Turrill                       | Rubiaceae      | Syn      | NL   | Acc  | Acc | Acc | Acc  | Acc | 2        | 1 |   |   |   |   | 1 |   |                | P      |            |            |

| Species Name                                      | Family        | Atlantis | Muer | POWO | WFO  | COL | GBIF | TRY | POWO Syn | H | P | G | T | C | F | L | Endemic Status | Native | Non native | Ornam Crop |
|---------------------------------------------------|---------------|----------|------|------|------|-----|------|-----|----------|---|---|---|---|---|---|---|----------------|--------|------------|------------|
| <i>Asphodelus aestivus</i> Brot.                  | Asphodelaceae | NL       | NL   | Acc  | Acc  | Acc | Acc  | Acc | 0        | 1 | 1 | 1 | 1 | 1 | 1 |   |                |        | P          |            |
| <i>Asphodelus ayardii</i> Jahand. & Maire         | Asphodelaceae | Acc      | Acc  | Acc  | Acc  | Acc | Acc  | Acc | 3        |   |   |   |   | 1 |   |   |                | P      |            |            |
| <i>Asphodelus fistulosus</i> L.                   | Asphodelaceae | Acc      | Acc  | Acc  | Acc  | Acc | Acc  | Acc | 3        | 1 | 1 | 1 | 1 | 1 | 1 | 1 |                | P      |            |            |
| <i>Asphodelus ramosus</i> L.                      | Asphodelaceae | Acc      | Acc  | Acc  | Acc  | Acc | Acc  | Acc | 0        | 1 | 1 | 1 | 1 | 1 | 1 | 1 |                | P      |            |            |
| <i>Asphodelus tenuifolius</i> Cav.                | Asphodelaceae | Acc      | Acc  | Acc  | Acc  | Acc | Acc  | Acc | 10       | 1 | 1 | 1 | 1 | 1 | 1 | 1 |                | P      |            |            |
| <i>Asplenium adiantum-nigrum</i> L.               | Aspleniaceae  | Acc      | Acc  | Acc  | Acc  | Acc | Acc  | Acc | 2        | 1 | 1 | 1 | 1 | 1 | 1 |   |                | S      |            |            |
| <i>Asplenium aethiopicum</i> (Burm. f.) Bech.     | Aspleniaceae  | Acc      | NL   | Acc  | Acc  | Acc | Acc  | Acc | 1        | 1 | 1 | 1 | 1 | 1 |   |   |                | S      |            |            |
| <i>Asplenium anceps</i> Lowe ex Hook. & Grev.     | Aspleniaceae  | Acc      | Acc  | Acc  | AmUn | Acc | Acc  | Acc | 0        | 1 | 1 | 1 | 1 |   |   |   |                | S      |            |            |
| <i>Asplenium aureum</i> Cav.                      | Aspleniaceae  | Acc      | Acc  | Acc  | Syn  | Acc | Acc  | Syn | 5        | 1 | 1 | 1 | 1 | 1 | 1 | 1 |                | S      |            |            |
| <i>Asplenium hemionitis</i> L.                    | Aspleniaceae  | Acc      | Acc  | Acc  | Acc  | Acc | Acc  | Acc | 8        | 1 | 1 | 1 | 1 | 1 | 1 | 1 |                | S      |            |            |
| <i>Asplenium monanthes</i> L.                     | Aspleniaceae  | Acc      | Acc  | Acc  | Acc  | Acc | Acc  | Acc | 2        |   | 1 |   |   |   |   |   |                | P      |            |            |
| <i>Asplenium obovatum</i> Viv.                    | Aspleniaceae  | Acc      | NL   | Acc  | AmUn | Acc | Acc  | Acc | 0        | 1 |   |   | 1 | 1 | 1 | 1 |                | S      |            |            |
| <i>Asplenium onopteris</i> L.                     | Aspleniaceae  | Acc      | Acc  | Acc  | Acc  | Acc | Acc  | Acc | 3        | 1 | 1 | 1 | 1 | 1 | 1 | 1 |                | S      |            |            |
| <i>Asplenium scolopendrium</i> L.                 | Aspleniaceae  | NL       | Acc  | Acc  | Acc  | Acc | Acc  | Acc | 3        |   |   |   | 1 | 1 |   |   |                |        | S          |            |
| <i>Asplenium septentrionale</i> (L.) Hoffm.       | Aspleniaceae  | Acc      | Acc  | Acc  | Acc  | Acc | Acc  | Acc | 8        |   | 1 |   | 1 |   |   |   |                | S      |            |            |
| <i>Asplenium sulcatum</i> Lam.                    | Aspleniaceae  | Syn      | Syn  | Acc  | Acc  | Acc | Acc  | Acc | 1        | 1 | 1 | 1 | 1 | 1 | 1 | 1 |                | S      |            |            |
| <i>Asplenium terorense</i> G.Kunkel               | Aspleniaceae  | Acc      | Acc  | Acc  | AmUn | Acc | Acc  | NL  | 0        |   |   |   |   | 1 |   |   | C              | S      |            |            |
| <i>Asplenium trichomanes</i> L.                   | Aspleniaceae  | Acc      | Acc  | Acc  | Acc  | Acc | Acc  | Acc | 2        |   | 1 |   |   |   |   |   |                | S      |            |            |
| <i>Asteriscus aquaticus</i> (L.) Less.            | Asteraceae    | Acc      | Acc  | Acc  | Acc  | Acc | Acc  | Acc | 13       |   | 1 | 1 | 1 | 1 |   |   |                | P      |            |            |
| <i>Asteriscus graveolens</i> (Forssk.) Less.      | Asteraceae    | Acc      | Acc  | Acc  | Acc  | Acc | Acc  | Acc | 4        |   |   |   |   | 1 |   |   |                | S      |            |            |
| <i>Asteriscus intermedius</i> (DC.) Pit. & Proust | Asteraceae    | Acc      | Acc  | Acc  | Acc  | Acc | Acc  | Acc | 4        |   |   |   |   |   |   | 1 | L              | S      |            |            |
| <i>Asteriscus schultzei</i> (Bolle) Pit. & Proust | Asteraceae    | Acc      | Acc  | Acc  | Acc  | Acc | Acc  | Acc | 5        |   |   |   |   |   | 1 | 1 |                | S      |            |            |
| <i>Asteriscus sericeus</i> (L.f.) DC.             | Asteraceae    | Acc      | Acc  | Acc  | Acc  | Acc | Acc  | Acc | 3        | 1 |   |   | 1 | 1 | 1 |   | A              | S      |            |            |
| <i>Astragalus boeticus</i> L.                     | Fabaceae      | Acc      | Acc  | Acc  | Acc  | Acc | Acc  | Acc | 3        | 1 |   |   | 1 | 1 |   | 1 |                | P      |            |            |

| Species Name                                                           | Family          | Atlantis | Muer | POWO | WFO | COL | GBIF | TRY | POWO Syn | H | P | G | T | C | F | L | Endemic Status | Native | Non native | Ornam Crop |
|------------------------------------------------------------------------|-----------------|----------|------|------|-----|-----|------|-----|----------|---|---|---|---|---|---|---|----------------|--------|------------|------------|
| <i>Astragalus edulis</i> Durand ex Bunge                               | Fabaceae        | Acc      | Acc  | Acc  | Acc | Acc | Acc  | Acc | 1        |   |   |   |   |   | 1 | 1 |                | P      |            |            |
| <i>Astragalus hamosus</i> L.                                           | Fabaceae        | Acc      | Acc  | Acc  | Acc | Acc | Acc  | Acc | 24       | 1 | 1 | 1 | 1 | 1 | 1 | 1 |                | S      |            |            |
| <i>Astragalus mareoticus</i> Delile                                    | Fabaceae        | Acc      | NL   | Acc  | Acc | Acc | Acc  | Acc | 2        |   |   |   |   |   | 1 | 1 |                | S      |            |            |
| <i>Astragalus sinaicus</i> Boiss.                                      | Fabaceae        | Acc      | Acc  | Acc  | Acc | Acc | Acc  | Acc | 1        |   |   |   |   |   | 1 | 1 |                | P      |            |            |
| <i>Astragalus solandri</i> Lowe                                        | Fabaceae        | Acc      | Acc  | Acc  | Acc | Acc | Acc  | NL  | 4        |   |   | 1 | 1 | 1 | 1 | 1 |                | P      |            |            |
| <i>Astragalus stella</i> L.                                            | Fabaceae        | Acc      | Acc  | Acc  | Acc | Acc | Acc  | Acc | 10       |   |   |   |   |   | 1 | 1 |                | P      |            |            |
| <i>Astydamia latifolia</i> (L.f.) Baill.                               | Apiaceae        | Acc      | Acc  | Acc  | Acc | Acc | Acc  | Acc | 9        | 1 | 1 | 1 | 1 | 1 | 1 | 1 |                | S      |            |            |
| <i>Athamanta cervariifolia</i> (DC.) DC.                               | Apiaceae        | Acc      | Syn  | Acc  | Acc | Acc | Acc  | Syn | 2        | 1 | 1 | 1 | 1 |   |   |   | A              | S      |            |            |
| <i>Athamanta montana</i> (Webb ex Christ) Spalik & Wojew. & S.R.Downie | Apiaceae        | Acc      | Syn  | Acc  | Acc | Acc | Acc  | Acc | 2        | 1 | 1 | 1 | 1 | 1 |   |   | A              | S      |            |            |
| <i>Athyrium filix-femina</i> (L.) Roth                                 | Athyriaceae     | Acc      | Acc  | Acc  | Acc | Acc | Acc  | Acc | 12       | 1 | 1 | 1 | 1 | 1 |   |   |                | S      |            |            |
| <i>Atocion armeria</i> (L.) Raf.                                       | Caryophyllaceae | NL       | NL   | Acc  | Syn | Syn | Acc  | Syn | 18       |   | 1 |   |   |   |   |   |                | S      |            |            |
| <i>Atractylis arbuscula</i> Svent & Michaelis                          | Asteraceae      | Acc      | NL   | Acc  | Acc | Acc | Acc  | NL  | 0        |   |   |   |   | 1 |   | 1 | A              | S      |            |            |
| <i>Atractylis cancellata</i> L.                                        | Asteraceae      | Acc      | Acc  | Acc  | Acc | Acc | Acc  | Acc | 9        |   | 1 | 1 | 1 | 1 | 1 | 1 |                | P      |            |            |
| <i>Atractylis preauxiana</i> Sch.Bip.                                  | Asteraceae      | Acc      | Acc  | Acc  | Acc | Acc | Acc  | Acc | 1        |   |   |   | 1 | 1 |   |   | A              | S      |            |            |
| <i>Atriplex glauca</i> L.                                              | Chenopodiaceae  | Acc      | Acc  | Acc  | Acc | Acc | Acc  | Acc | 6        | 1 |   | 1 | 1 | 1 | 1 | 1 |                | P      |            |            |
| <i>Atriplex halimus</i> L.                                             | Chenopodiaceae  | Acc      | Acc  | Acc  | Acc | Acc | Acc  | Acc | 7        |   |   |   | 1 | 1 | 1 | 1 |                | P      |            |            |
| <i>Atriplex lindleyi</i> Moq.                                          | Chenopodiaceae  | Acc      | Acc  | Acc  | Acc | Acc | Acc  | Acc | 3        |   |   |   |   |   |   | 1 |                |        | S          |            |
| <i>Atriplex nummularia</i> Lindl.                                      | Chenopodiaceae  | Acc      | Acc  | Acc  | Acc | Acc | Acc  | Acc | 6        |   |   |   | 1 | 1 | 1 |   |                |        | S          |            |
| <i>Atriplex portulacoides</i> L.                                       | Chenopodiaceae  | Syn      | Acc  | Acc  | Acc | Acc | Acc  | Acc | 7        |   |   |   |   | 1 |   | 1 |                |        | S          |            |
| <i>Atriplex prostrata</i> Boucher ex DC.                               | Chenopodiaceae  | Acc      | Acc  | Acc  | Acc | Acc | Acc  | Acc | 43       |   |   |   | 1 |   |   | 1 |                |        | S          |            |
| <i>Atriplex semibaccata</i> R.Br.                                      | Chenopodiaceae  | Acc      | Acc  | Acc  | Acc | Acc | Acc  | Acc | 13       | 1 | 1 | 1 | 1 | 1 | 1 | 1 |                |        | I          |            |
| <i>Atriplex semilunaris</i> Aellen                                     | Chenopodiaceae  | Acc      | Acc  | Acc  | Acc | Acc | Acc  | Acc | 2        |   |   |   |   |   | 1 | 1 |                |        | I          |            |
| <i>Atriplex suberecta</i> Verd.                                        | Chenopodiaceae  | Acc      | Acc  | Acc  | Acc | Acc | Acc  | Acc | 1        |   |   |   |   | 1 | 1 | 1 |                |        | S          |            |
| <i>Austrocylindropuntia cylindrica</i> (Lam.) Backeb.                  | Cactaceae       | Acc      | Acc  | Acc  | Acc | Acc | Acc  | Acc | 8        |   | 1 |   | 1 | 1 | 1 | 1 |                |        | S          | O          |

| Species Name                                               | Family         | Atlantis | Muer | POWO | WFO  | COL | GBIF | TRY | POWO Syn | H | P | G | T | C | F | L | Endemic Status | Native | Non native | Ornam Crop |
|------------------------------------------------------------|----------------|----------|------|------|------|-----|------|-----|----------|---|---|---|---|---|---|---|----------------|--------|------------|------------|
| <i>Austrocyllindropuntia subulata</i> (Muehlenpf.) Backeb. | Cactaceae      | Acc      | Acc  | Acc  | Acc  | Acc | Acc  | Acc | 7        |   | 1 | 1 | 1 | 1 | 1 | 1 |                |        | S          | O          |
| <i>Avellinia festucoides</i> (Link) Valdés & H.Scholz      | Poaceae        | Acc      | Acc  | Acc  | Syn  | Acc | Acc  | Syn | 23       |   |   | 1 |   | 1 |   |   |                |        | I          |            |
| <i>Avena barbata</i> Pott ex Link                          | Poaceae        | Acc      | Acc  | Acc  | Acc  | Acc | Acc  | Acc | 24       | 1 | 1 | 1 | 1 | 1 | 1 | 1 |                | P      |            |            |
| <i>Avena byzantina</i> K.Koch                              | Poaceae        | Acc      | Acc  | Acc  | Acc  | Acc | Acc  | Acc | 1        |   | 1 |   |   |   |   |   |                | P      |            |            |
| <i>Avena canariensis</i> B.R.Baum, Rajhathy & D.R.Sampson  | Poaceae        | Acc      | Acc  | Acc  | Syn  | Acc | Acc  | Syn | 0        |   |   |   | 1 |   | 1 | 1 | A              | S      |            |            |
| <i>Avena fatua</i> L.                                      | Poaceae        | Acc      | Acc  | Acc  | Acc  | Acc | Acc  | Acc | 28       | 1 | 1 | 1 | 1 | 1 | 1 | 1 |                | S      |            |            |
| <i>Avena longiglumis</i> Durieu                            | Poaceae        | Acc      | NL   | Acc  | Acc  | Acc | Acc  | Acc | 1        |   |   |   | 1 |   |   |   |                |        | P          |            |
| <i>Avena sativa</i> L.                                     | Poaceae        | Acc      | Acc  | Acc  | Acc  | Acc | Acc  | Acc | 44       |   |   |   | 1 | 1 | 1 | 1 |                |        | P          | C          |
| <i>Avena sterilis</i> L.                                   | Poaceae        | Acc      | Acc  | Acc  | Acc  | Acc | Acc  | Acc | 3        |   | 1 | 1 | 1 | 1 | 1 | 1 |                | P      |            |            |
| <i>Avena strigosa</i> Schreb.                              | Poaceae        | Acc      | Acc  | Acc  | Acc  | Acc | Acc  | Acc | 12       |   | 1 |   | 1 |   |   |   |                |        | P          |            |
| <i>Azolla filiculoides</i> Lam.                            | Salviniaceae   | Acc      | Acc  | Acc  | Acc  | Acc | Acc  | Acc | 0        |   | 1 |   | 1 | 1 |   |   |                |        | I          | O          |
| <i>Balanites aegyptiaca</i> (L.) Delile                    | Zygophyllaceae | Acc      | NL   | Acc  | Acc  | Acc | Acc  | Acc | 2        |   |   |   | 1 |   |   |   |                |        | S          | O          |
| <i>Ballota nigra</i> L.                                    | Lamiaceae      | Acc      | NL   | Acc  | Acc  | Acc | Acc  | Acc | 4        | 1 |   |   |   |   |   |   |                |        | S          |            |
| <i>Bambusa vulgaris</i> Schrad. ex J.C. Wendl.             | Poaceae        | Acc      | Acc  | Acc  | Acc  | Acc | Acc  | Acc | 25       |   |   |   |   | 1 |   |   |                |        | S          | O          |
| <i>Barbarea verna</i> (Mill.) Asch.                        | Brassicaceae   | Acc      | Acc  | Acc  | Acc  | Acc | Acc  | Acc | 11       |   | 1 | 1 | 1 |   |   |   |                |        | P          |            |
| <i>Bassia hyssopifolia</i> (Pall.) Kuntze                  | Amaranthaceae  | Acc      | Acc  | Acc  | Acc  | Acc | Acc  | Acc | 15       |   |   |   | 1 | 1 | 1 |   |                |        | P          |            |
| <i>Bassia scoparia</i> (L.) A.J.Scott                      | Amaranthaceae  | Acc      | Acc  | Acc  | Acc  | Acc | Acc  | Acc | 39       |   |   |   | 1 | 1 | 1 | 1 |                |        | S          | O          |
| <i>Bassia tomentosa</i> (Lowe) Maire & Weiller             | Amaranthaceae  | Acc      | Acc  | Acc  | Acc  | Syn | Syn  | Acc | 7        | 1 | 1 | 1 | 1 | 1 | 1 | 1 |                | S      |            |            |
| <i>Begonia subvillosa</i> Klotzsch                         | Begoniaceae    | Syn      | NL   | Acc  | Acc  | Acc | Acc  | Acc | 6        |   | 1 |   |   |   |   |   |                |        | S          | O          |
| <i>Bellardia trixago</i> (L.) All.                         | Orobanchaceae  | Acc      | Acc  | Acc  | AmUn | Acc | Acc  | Acc | 25       | 1 | 1 |   | 1 | 1 |   |   |                |        | P          |            |
| <i>Bellis annua</i> L.                                     | Asteraceae     | Acc      | Acc  | Acc  | Acc  | Acc | Acc  | Acc | 1        |   |   |   | 1 |   |   |   |                | S      |            |            |
| <i>Bellis perennis</i> L.                                  | Asteraceae     | Acc      | NL   | Acc  | Acc  | Acc | Acc  | Acc | 14       |   | 1 |   | 1 |   |   |   |                |        | P          |            |
| <i>Bencomia brachystachya</i> Svent.                       | Rosaceae       | Acc      | Acc  | Acc  | AmUn | Acc | Acc  | NL  | 0        |   |   |   |   | 1 |   |   | C              | S      |            |            |
| <i>Bencomia caudata</i> (Aiton) Webb & Berthel.            | Rosaceae       | Acc      | Acc  | Acc  | AmUn | Acc | Acc  | Acc | 1        |   | 1 |   | 1 | 1 |   |   | A              | S      |            |            |

| Species Name                                                   | Family          | Atlantis | Muer | POWO | WFO  | COL  | GBIF | TRY | POWO Syn | H | P | G | T | C | F | L | Endemic Status | Native | Non native | Ornam Crop |
|----------------------------------------------------------------|-----------------|----------|------|------|------|------|------|-----|----------|---|---|---|---|---|---|---|----------------|--------|------------|------------|
| <i>Bencomia exstipulata</i> Svent.                             | Rosaceae        | Acc      | Acc  | Acc  | AmUn | Acc  | Acc  | Acc | 0        |   | 1 |   | 1 |   |   |   | A              | S      |            |            |
| <i>Bencomia sphaerocarpa</i> Svent.                            | Rosaceae        | Acc      | Acc  | Acc  | AmUn | Acc  | Acc  | Acc | 0        | 1 |   |   |   |   |   |   | H              | S      |            |            |
| <i>Beta macrocarpa</i> Guss.                                   | Caryophyllaceae | Acc      | Acc  | Acc  | Acc  | Acc  | Acc  | Acc | 1        |   | 1 |   | 1 | 1 | 1 | 1 |                | P      |            |            |
| <i>Beta vulgaris</i> L.                                        | Caryophyllaceae | Acc      | Acc  | Acc  | Acc  | Acc  | Acc  | Acc | 46       | 1 | 1 | 1 | 1 | 1 | 1 | 1 |                | P      |            | C          |
| <i>Bethencourtia hermosae</i> (Pit.) G.Kunkel                  | Asteraceae      | Acc      | Acc  | Acc  | AmUn | Acc  | Acc  | NL  | 2        |   |   | 1 |   |   |   |   | G              | S      |            |            |
| <i>Bethencourtia palmensis</i> (Nees) Choisy ex Link           | Asteraceae      | Acc      | Acc  | Acc  | AmUn | Acc  | Acc  | Acc | 3        |   | 1 |   | 1 |   |   |   | A              | S      |            |            |
| <i>Bethencourtia rupicola</i> (B.Nord.) B.Nord                 | Asteraceae      | Acc      | NL   | Acc  | Acc  | Acc  | Acc  | NL  | 1        |   |   | 1 |   |   |   |   |                | S      |            |            |
| <i>Biancaea decapetala</i> (Roth) O.Deg.                       | Fabaceae        | Syn      | NL   | Acc  | Syn  | NL   | Syn  | NL  | 14       |   |   |   |   | 1 |   |   |                |        | S          | O          |
| <i>Bidens aurea</i> (Aiton) Sherff                             | Asteraceae      | Acc      | Acc  | Acc  | Acc  | Acc  | Acc  | Acc | 39       | 1 | 1 | 1 | 1 | 1 | 1 |   |                |        | I          |            |
| <i>Bidens pilosa</i> L.                                        | Asteraceae      | Acc      | Acc  | Acc  | Acc  | Acc  | Acc  | Acc | 73       | 1 | 1 | 1 | 1 | 1 | 1 | 1 |                |        | S          |            |
| <i>Bifora testiculata</i> (L.) Roth                            | Apiaceae        | Acc      | Acc  | Acc  | Acc  | Acc  | Acc  | Acc | 10       |   |   |   |   | 1 |   |   |                |        | P          |            |
| <i>Biscutella auriculata</i> L.                                | Brassicaceae    | Acc      | Acc  | Acc  | Acc  | Acc  | Acc  | Acc | 11       |   | 1 |   | 1 |   | 1 | 1 |                | P      |            |            |
| <i>Biserrula pelecinus</i> L.                                  | Fabaceae        | Syn      | Acc  | Acc  | Syn  | Syn  | Syn  | NL  | 6        | 1 | 1 | 1 | 1 | 1 | 1 | 1 |                | P      |            |            |
| <i>Bituminaria bituminosa</i> (L.) C.H.Stirt.                  | Fabaceae        | Acc      | Acc  | Acc  | Acc  | Acc  | Acc  | Acc | 22       | 1 | 1 | 1 | 1 | 1 | 1 | 1 |                | P      |            |            |
| <i>Blackstonia imperfoliata</i> (L.f.) Samp.                   | Gentianaceae    | Acc      | Acc  | Acc  | Acc  | Acc  | Acc  | Acc | 9        |   |   |   |   | 1 |   |   |                |        | P          |            |
| <i>Blechnum spicant</i> (L.) Sm.                               | Blechnaceae     | Syn      | Acc  | Acc  | Acc  | Syn  | Acc  | Acc | 35       |   |   | 1 | 1 |   |   |   |                | S      |            |            |
| <i>Bolboschoenus glaucus</i> (Lam.) S.G.Sm.                    | Cyperaceae      | Acc      | NL   | Acc  | Acc  | Acc  | Acc  | Acc | 8        |   |   |   | 1 |   |   |   |                |        | S          |            |
| <i>Bolboschoenus maritimus</i> (L.) Palla                      | Cyperaceae      | Acc      | Acc  | Acc  | Acc  | Acc  | Acc  | Acc | 3        |   |   |   | 1 |   | 1 |   |                | P      |            |            |
| <i>Borago officinalis</i> L.                                   | Boraginaceae    | Acc      | Acc  | Acc  | Acc  | Acc  | Acc  | Acc | 3        | 1 | 1 | 1 | 1 | 1 | 1 | 1 |                |        | S          | C          |
| <i>Bosea yervamora</i> L.                                      | Amaranthaceae   | Acc      | Acc  | Acc  | Acc  | AmUn | Syn  | Acc | 3        | 1 | 1 | 1 | 1 | 1 | 1 |   | A              | S      |            |            |
| <i>Bothriochloa insculpta</i> (Hochst. ex A. Rich.) & A. Camus | Poaceae         | Acc      | NL   | Acc  | Acc  | Acc  | Acc  | Acc | 5        |   |   |   | 1 | 1 |   |   |                | P      |            |            |
| <i>Bothriochloa ischaemum</i> (L.) Keng                        | Poaceae         | Acc      | NL   | Acc  | Acc  | Acc  | Acc  | Acc | 16       |   |   |   |   | 1 |   |   |                | P      |            |            |
| <i>Bothriochloa pertusa</i> (L.) A. Camus                      | Poaceae         | Acc      | Acc  | Acc  | Acc  | Acc  | Acc  | Acc | 9        |   |   |   | 1 | 1 |   |   |                | P      |            |            |

| Species Name                                                    | Family       | Atlantis | Muer | POWO | WFO  | COL | GBIF | TRY | POWO Syn | H | P | G | T | C | F | L | Endemic Status | Native | Non native | Ornam Crop |
|-----------------------------------------------------------------|--------------|----------|------|------|------|-----|------|-----|----------|---|---|---|---|---|---|---|----------------|--------|------------|------------|
| <i>Brachypodium arbuscula</i> (Gay ex St.-Yves) Gay ex St.-Yves | Poaceae      | Acc      | Acc  | Acc  | Acc  | Acc | Acc  | Acc | 0        | 1 |   | 1 | 1 |   |   |   | A              | S      |            |            |
| <i>Brachypodium distachyon</i> (L.) P.Beauv.                    | Poaceae      | Acc      | Acc  | Acc  | Acc  | Acc | Acc  | Acc | 53       | 1 | 1 | 1 | 1 | 1 | 1 | 1 |                | P      |            |            |
| <i>Brachypodium glaucovirens</i> (Murb.) Sagorski               | Poaceae      | Acc      | Acc  | Acc  | Syn  | Acc | Acc  | NL  | 1        |   | 1 |   |   |   |   |   |                |        | S          |            |
| <i>Brachypodium phoenicoides</i> (L.) Roem. & Schult.           | Poaceae      | Acc      | Acc  | Acc  | Acc  | Acc | Acc  | Acc | 13       |   |   |   |   |   | 1 |   |                |        | P          |            |
| <i>Brachypodium sylvaticum</i> (Huds.) P.Beauv.                 | Poaceae      | Acc      | Acc  | Acc  | Acc  | Acc | Acc  | Acc | 4        | 1 | 1 | 1 | 1 | 1 |   |   |                | P      |            |            |
| <i>Brassica bourgeau</i> (Webb ex Christ) Kuntze                | Brassicaceae | Acc      | Acc  | Acc  | AmUn | Acc | Acc  | Acc | 0        | 1 | 1 | 1 | 1 |   | 1 |   | A              | S      |            |            |
| <i>Brassica napus</i> L.                                        | Brassicaceae | Acc      | NL   | Acc  | Acc  | Acc | Acc  | Acc | 28       |   |   |   |   | 1 |   |   |                |        | P          | C          |
| <i>Brassica nigra</i> (L.) K.Koch                               | Brassicaceae | Acc      | Acc  | Acc  | Acc  | Acc | Acc  | Acc | 24       |   |   | 1 | 1 |   |   | 1 |                |        | P          | C          |
| <i>Brassica oleracea</i> L.                                     | Brassicaceae | Acc      | Acc  | Acc  | Acc  | Acc | Acc  | Acc | 45       | 1 | 1 | 1 | 1 | 1 | 1 | 1 |                |        | S          | C          |
| <i>Briza maxima</i> L.                                          | Poaceae      | Acc      | Acc  | Acc  | Acc  | Acc | Acc  | Acc | 14       | 1 | 1 | 1 | 1 | 1 | 1 | 1 |                | P      |            |            |
| <i>Briza media</i> L.                                           | Poaceae      | Acc      | Acc  | Acc  | Acc  | Acc | Acc  | Acc | 13       |   |   |   | 1 | 1 |   |   |                | P      |            |            |
| <i>Briza minor</i> L.                                           | Poaceae      | Acc      | Acc  | Acc  | Acc  | Acc | Acc  | Acc | 7        | 1 | 1 | 1 | 1 | 1 |   |   |                | P      |            |            |
| <i>Bromus catharticus</i> Vahl.                                 | Poaceae      | Acc      | Acc  | Acc  | Acc  | Acc | Acc  | Acc | 44       | 1 | 1 | 1 | 1 | 1 | 1 | 1 |                |        | S          |            |
| <i>Bromus commutatus</i> Schrad.                                | Poaceae      | Acc      | NL   | Acc  | Acc  | Acc | Acc  | Acc | 4        |   | 1 |   |   |   |   |   |                |        | P          |            |
| <i>Bromus diandrus</i> Roth.                                    | Poaceae      | Acc      | Acc  | Acc  | Acc  | Acc | Acc  | Acc | 15       | 1 | 1 | 1 | 1 | 1 | 1 | 1 |                | P      |            |            |
| <i>Bromus hordeaceus</i> L.                                     | Poaceae      | Acc      | Acc  | Acc  | Acc  | Acc | Acc  | Acc | 2        | 1 | 1 | 1 | 1 | 1 | 1 | 1 |                | P      |            |            |
| <i>Bromus lanceolatus</i> Roth.                                 | Poaceae      | Acc      | Acc  | Acc  | Acc  | Acc | Acc  | Acc | 18       | 1 | 1 | 1 | 1 | 1 | 1 | 1 |                | P      |            |            |
| <i>Bromus lepidus</i> Holmb.                                    | Poaceae      | Acc      | Acc  | Acc  | Acc  | Acc | Acc  | Acc | 6        |   |   |   |   | 1 |   |   |                |        | P          |            |
| <i>Bromus madritensis</i> L.                                    | Poaceae      | Acc      | Acc  | Acc  | Acc  | Acc | Acc  | Acc | 31       | 1 | 1 | 1 | 1 | 1 | 1 | 1 |                | P      |            |            |
| <i>Bromus rigidus</i> Roth.                                     | Poaceae      | Acc      | Acc  | Acc  | Acc  | Acc | Acc  | Acc | 21       | 1 | 1 | 1 | 1 | 1 | 1 | 1 |                | P      |            |            |
| <i>Bromus rubens</i> L.                                         | Poaceae      | Acc      | Syn  | Acc  | Acc  | Acc | Acc  | Acc | 3        | 1 | 1 | 1 | 1 | 1 | 1 | 1 |                | P      |            |            |
| <i>Bromus secalinus</i> L.                                      | Poaceae      | Syn      | NL   | Acc  | Acc  | Acc | Acc  | Acc | 23       |   | 1 |   |   |   |   |   |                |        | P          |            |
| <i>Bromus squarrosus</i> L.                                     | Poaceae      | Acc      | Acc  | Acc  | Acc  | Acc | Acc  | Acc | 16       |   |   |   |   |   | 1 |   |                | P      |            |            |
| <i>Bromus sterilis</i> L.                                       | Poaceae      | Acc      | Acc  | Acc  | Acc  | Acc | Acc  | Acc | 23       |   | 1 |   | 1 |   |   |   |                |        | P          |            |

| Species Name                                  | Family          | Atlantis | Muer | POWO | WFO | COL | GBIF | TRY | POWO Syn | H | P | G | T | C | F | L | Endemic Status | Native | Non native | Ornam Crop |
|-----------------------------------------------|-----------------|----------|------|------|-----|-----|------|-----|----------|---|---|---|---|---|---|---|----------------|--------|------------|------------|
| <i>Bromus tectorum</i> L.                     | Poaceae         | Acc      | Acc  | Acc  | Acc | Acc | Acc  | Acc | 23       |   | 1 |   | 1 | 1 |   |   |                | P      |            |            |
| <i>Bryonia verrucosa</i> Aiton                | Cucurbitaceae   | Acc      | Acc  | Acc  | Acc | Acc | Acc  | Acc | 1        | 1 | 1 | 1 | 1 | 1 |   | 1 | A              | S      |            |            |
| <i>Bufonia paniculata</i> Dubois              | Caryophyllaceae | Acc      | NL   | Acc  | Acc | Acc | Acc  | Acc | 4        |   | 1 | 1 | 1 | 1 |   |   |                | S      |            |            |
| <i>Buglossoides arvensis</i> (L.) I.M.Johnst. | Boraginaceae    | Acc      | Acc  | Acc  | Acc | Acc | Acc  | Acc | 12       |   |   |   | 1 | 1 | 1 | 1 |                | P      |            |            |
| <i>Bupleurum handiense</i> (Bolte) G.Kunkel   | Apiaceae        | Acc      | Acc  | Acc  | Acc | Acc | Acc  | Acc | 0        |   |   |   |   |   | 1 | 1 | A              | S      |            |            |
| <i>Bupleurum lancifolium</i> Hornem.          | Apiaceae        | Acc      | Acc  | Acc  | Acc | Acc | Acc  | Acc | 3        |   |   |   | 1 | 1 |   |   |                |        | P          |            |
| <i>Bupleurum salicifolium</i> R.Br.           | Apiaceae        | Acc      | Acc  | Acc  | Acc | Acc | Acc  | Acc | 1        | 1 |   | 1 | 1 |   |   |   |                | S      |            |            |
| <i>Bupleurum semicompositum</i> L.            | Apiaceae        | Acc      | Acc  | Acc  | Acc | Acc | Acc  | Acc | 7        | 1 |   | 1 | 1 | 1 | 1 | 1 |                | S      |            |            |
| <i>Bystropogon canariensis</i> (L.) L'Hér.    | Lamiaceae       | Acc      | Acc  | Acc  | Acc | Acc | Acc  | Acc | 5        | 1 | 1 | 1 | 1 | 1 |   |   | A              | S      |            |            |
| <i>Bystropogon odoratissimus</i> Bolle        | Lamiaceae       | Acc      | Acc  | Acc  | Acc | Acc | Acc  | NL  | 0        |   |   |   | 1 |   |   |   | T              | S      |            |            |
| <i>Bystropogon origanifolius</i> L'Hér.       | Lamiaceae       | Acc      | Acc  | Acc  | Acc | Acc | Acc  | Acc | 1        |   |   | 1 | 1 |   |   |   | A              | S      |            |            |
| <i>Bystropogon plumosus</i> (L.f.) L'Hér.     | Lamiaceae       | Acc      | Acc  | Acc  | Acc | Acc | Acc  | NL  | 1        |   |   |   | 1 |   |   |   | T              | S      |            |            |
| <i>Bystropogon wildpretii</i> La Serna        | Lamiaceae       | Acc      | Acc  | Acc  | Acc | Acc | Acc  | Acc | 0        |   | 1 |   |   |   |   |   | P              | S      |            |            |
| <i>Cakile maritima</i> Scop.                  | Brassicaceae    | Acc      | Acc  | Acc  | Acc | Acc | Acc  | Acc | 24       |   |   |   | 1 | 1 | 1 | 1 |                | P      |            |            |
| <i>Calamagrostis arenaria</i> (L.) Roth       | Poaceae         | Acc      | Syn  | Acc  | Syn | Syn | Syn  | NL  | 8        |   |   |   |   |   | 1 |   |                | P      |            |            |
| <i>Calceolaria tripartita</i> Ruiz & Pav.     | Calceolariaceae | Acc      | Acc  | Acc  | Acc | Acc | Acc  | Acc | 30       |   | 1 |   | 1 |   |   |   |                |        | S          | O          |
| <i>Calendula arvensis</i> M.Bieb.             | Asteraceae      | Syn      | Syn  | Acc  | Acc | Acc | Acc  | Acc | 28       | 1 | 1 | 1 | 1 | 1 | 1 | 1 |                |        | S          |            |
| <i>Calendula officinalis</i> L.               | Asteraceae      | Acc      | Acc  | Acc  | Acc | Acc | Acc  | Acc | 11       | 1 | 1 | 1 | 1 | 1 |   |   |                |        | S          | C          |
| <i>Calendula stellata</i> Cav.                | Asteraceae      | Acc      | Acc  | Acc  | Acc | Acc | Acc  | Acc | 10       |   |   |   |   | 1 | 1 |   |                |        | S          |            |
| <i>Calendula suffruticosa</i> Vahl            | Asteraceae      | Acc      | Acc  | Acc  | Acc | Acc | Acc  | Acc | 0        |   |   |   | 1 |   |   |   |                | P      |            |            |
| <i>Calendula tripterocarpa</i> Rupr.          | Asteraceae      | Acc      | Acc  | Acc  | Acc | Acc | Acc  | Acc | 2        |   |   |   | 1 | 1 | 1 | 1 |                | P      |            |            |
| <i>Callitriche stagnalis</i> Scop.            | Plantaginaceae  | Acc      | Acc  | Acc  | Acc | Acc | Acc  | Acc | 6        |   |   | 1 | 1 | 1 |   |   |                | P      |            |            |
| <i>Calotropis procera</i> (Aiton) Dryand.     | Apocynaceae     | Acc      | Acc  | Acc  | Acc | Acc | Acc  | Acc | 13       |   |   |   |   | 1 | 1 |   |                |        | I          |            |
| <i>Calystegia soldanella</i> (L.) R.Br.       | Convolvulaceae  | Acc      | Acc  | Acc  | Acc | Acc | Acc  | Acc | 12       |   |   |   |   |   |   | 1 |                | P      |            |            |

| Species Name                                                    | Family           | Atlantis | Muer | POWO | WFO  | COL | GBIF | TRY | POWO Syn | H | P | G | T | C | F | L | Endemic Status | Native | Non native | Ornam Crop |
|-----------------------------------------------------------------|------------------|----------|------|------|------|-----|------|-----|----------|---|---|---|---|---|---|---|----------------|--------|------------|------------|
| <i>Camelina microcarpa</i> Andr. ex DC.                         | Brassicaceae     | NL       | NL   | Acc  | Acc  | Acc | Acc  | Acc | 14       |   |   |   |   | 1 |   |   |                |        | P          |            |
| <i>Campanula dichotoma</i> L.                                   | Campanulaceae    | Acc      | Acc  | Acc  | Acc  | Acc | Acc  | Acc | 3        |   |   | 1 | 1 |   | 1 | 1 |                | S      |            |            |
| <i>Campanula erinus</i> L.                                      | Campanulaceae    | Acc      | Acc  | Acc  | Acc  | Acc | Acc  | Acc | 6        | 1 | 1 | 1 | 1 | 1 | 1 | 1 |                | P      |            |            |
| <i>Camptoloma canariense</i> (Webb & Berthel.) Hilliard         | Scrophulariaceae | Acc      | Acc  | Acc  | Acc  | Acc | Acc  | Acc | 3        |   |   |   |   | 1 |   |   | C              | S      |            |            |
| <i>Campylanthus salsoloides</i> (L.f.) Roth                     | Plantaginaceae   | Acc      | Acc  | Acc  | Acc  | Acc | Acc  | Acc | 1        |   | 1 | 1 | 1 | 1 | 1 | 1 | A              | S      |            |            |
| <i>Canaria tortuosa</i> (Webb & Berthel.) Jim.Mejías & P.Vargas | Apiaceae         | Acc      | Syn  | Acc  | NL   | Acc | Acc  | NL  | 5        | 1 | 1 | 1 | 1 | 1 |   |   | A              | S      |            |            |
| <i>Canarina canariensis</i> (L.) Vatke                          | Campanulaceae    | Acc      | Acc  | Acc  | Acc  | Acc | Acc  | Acc | 5        | 1 | 1 | 1 | 1 | 1 |   |   | A              | S      |            |            |
| <i>Canna glauca</i> L.                                          | Cannaceae        | NL       | NL   | Acc  | Acc  | Acc | Acc  | Acc | 18       |   | 1 |   |   |   |   |   |                |        | S          | O          |
| <i>Canna indica</i> L.                                          | Cannaceae        | Acc      | Acc  | Acc  | Acc  | Acc | Acc  | Acc | 116      |   | 1 | 1 | 1 | 1 |   |   |                |        | S          | O          |
| <i>Capparis spinosa</i> L.                                      | Capparaceae      | Acc      | Acc  | Acc  | Acc  | Acc | Acc  | Acc | 6        | 1 |   |   |   |   |   |   |                |        | S          | C          |
| <i>Capsella bursa-pastoris</i> (L.) Medik.                      | Brassicaceae     | Acc      | Acc  | Acc  | Acc  | Acc | Acc  | Acc | 237      | 1 | 1 | 1 | 1 | 1 | 1 | 1 |                | P      |            |            |
| <i>Capsella rubella</i> Reut.                                   | Brassicaceae     | Acc      | Acc  | Acc  | Acc  | Acc | Acc  | Acc | 7        | 1 | 1 | 1 |   |   |   |   |                | P      |            |            |
| <i>Capsicum annuum</i> L.                                       | Solanaceae       | NL       | NL   | Acc  | Acc  | Acc | Acc  | Acc | 80       | 1 | 1 | 1 | 1 | 1 | 1 | 1 |                | S      |            | C          |
| <i>Cardamine hirsuta</i> L.                                     | Brassicaceae     | Acc      | Acc  | Acc  | Acc  | Acc | Acc  | Acc | 25       | 1 | 1 | 1 | 1 | 1 |   |   |                | P      |            |            |
| <i>Cardiospermum grandiflorum</i> Sw.                           | Sapindaceae      | Acc      | Acc  | Acc  | Acc  | Acc | Acc  | Acc | 11       |   | 1 | 1 | 1 | 1 |   |   |                |        | I          | O          |
| <i>Cardiospermum halicacabum</i> L.                             | Sapindaceae      | NL       | NL   | Acc  | Acc  | Acc | Acc  | Acc | 9        |   |   |   | 1 | 1 |   |   |                |        | S          | O          |
| <i>Carduus baeocephalus</i> Webb                                | Asteraceae       | Acc      | Acc  | Acc  | Acc  | Acc | Acc  | Acc | 0        |   |   |   |   | 1 |   |   | C              | S      |            |            |
| <i>Carduus bourgaei</i> Kazmi                                   | Asteraceae       | Acc      | Acc  | Acc  | Acc  | Acc | Acc  | NL  | 1        |   |   |   |   |   | 1 |   | F              | S      |            |            |
| <i>Carduus clavulatus</i> Link                                  | Asteraceae       | Acc      | Acc  | Acc  | Acc  | Acc | Acc  | Acc | 2        | 1 | 1 | 1 | 1 | 1 | 1 | 1 | A              | S      |            |            |
| <i>Carduus pycnocephalus</i> L.                                 | Asteraceae       | Acc      | Acc  | Acc  | Acc  | Acc | Acc  | Acc | 0        |   | 1 | 1 | 1 | 1 | 1 |   |                | P      |            |            |
| <i>Carduus tenuiflorus</i> Curtis                               | Asteraceae       | Acc      | Acc  | Acc  | Acc  | Acc | Acc  | Acc | 2        | 1 | 1 | 1 | 1 | 1 | 1 | 1 |                | P      |            |            |
| <i>Carduus volutarioides</i> Reyes-Bet.                         | Asteraceae       | Acc      | Acc  | Acc  | AmUn | Acc | Acc  | NL  | 0        |   |   |   | 1 |   |   |   | T              | S      |            |            |
| <i>Carex canariensis</i> Kük.                                   | Cyperaceae       | Acc      | Acc  | Acc  | Acc  | Acc | Acc  | Acc | 1        | 1 | 1 | 1 | 1 | 1 |   |   | A              | S      |            |            |
| <i>Carex demissa</i> Hornem.                                    | Cyperaceae       | Acc      | Acc  | Acc  | Syn  | Acc | Acc  | NL  | 1        |   |   |   | 1 |   |   |   |                | P      |            |            |



| Species Name                                             | Family        | Atlantis | Muer | POWO | WFO | COL | GBIF | TRY | POWO Syn | H | P | G | T | C | F | L | Endemic Status | Native | Non native | Ornam Crop |
|----------------------------------------------------------|---------------|----------|------|------|-----|-----|------|-----|----------|---|---|---|---|---|---|---|----------------|--------|------------|------------|
| <i>Carex distachya</i> Desf.                             | Cyperaceae    | Acc      | Acc  | Acc  | Acc | Acc | Acc  | Acc | 0        |   |   | 1 |   | 1 |   |   |                | P      |            |            |
| <i>Carex distans</i> L.                                  | Cyperaceae    | Acc      | NL   | Acc  | Acc | Acc | Acc  | Acc | 1        |   |   | 1 |   | 1 |   |   |                | P      |            |            |
| <i>Carex divisa</i> Huds.                                | Cyperaceae    | Acc      | Acc  | Acc  | Acc | Acc | Acc  | Acc | 34       | 1 |   |   |   |   |   |   |                | P      |            |            |
| <i>Carex divulsa</i> Stokes                              | Cyperaceae    | Acc      | Acc  | Acc  | Acc | Acc | Acc  | Acc | 14       | 1 | 1 | 1 | 1 | 1 | 1 | 1 |                | P      |            |            |
| <i>Carex leersii</i> F.W. Schultz                        | Cyperaceae    | NL       | Syn  | Acc  | Acc | Acc | Acc  | Acc | 10       |   |   | 1 | 1 | 1 |   |   |                | P      |            |            |
| <i>Carex otrubae</i> Podp.                               | Cyperaceae    | Acc      | Acc  | Acc  | Syn | Acc | Acc  | Syn | 8        |   |   | 1 | 1 | 1 |   |   |                | P      |            |            |
| <i>Carex pairae</i> F.W.Schultz                          | Cyperaceae    | Syn      | Acc  | Acc  | Acc | Acc | Acc  | Acc | 3        |   |   | 1 | 1 | 1 |   |   |                | P      |            |            |
| <i>Carex paniculata</i> L.                               | Cyperaceae    | Acc      | Acc  | Acc  | Acc | Acc | Acc  | Acc | 3        |   |   |   | 1 |   |   |   |                | S      |            |            |
| <i>Carex perraudieriana</i> (Kük. ex Bornm.) Gay ex Kük. | Cyperaceae    | Acc      | Acc  | Acc  | Acc | Acc | Acc  | Acc | 0        |   | 1 | 1 | 1 |   |   |   | A              | S      |            |            |
| <i>Carex pseudocyperus</i> L.                            | Cyperaceae    | Acc      | Acc  | Acc  | Acc | Acc | Acc  | Acc | 1        |   |   |   | 1 |   |   |   |                | P      |            |            |
| <i>Carica papaya</i> L.                                  | Caricaceae    | NL       | NL   | Acc  | Acc | Acc | Acc  | Acc | 31       |   | 1 |   | 1 | 1 | 1 |   |                |        | S          | C          |
| <i>Carlina canariensis</i> Pit.                          | Asteraceae    | Acc      | Acc  | Acc  | Acc | Acc | Acc  | Acc | 0        |   |   |   |   | 1 |   |   | C              | S      |            |            |
| <i>Carlina falcata</i> Svent.                            | Asteraceae    | Acc      | Acc  | Acc  | Syn | Acc | Acc  | Syn | 1        |   | 1 |   | 1 |   |   |   | A              | S      |            |            |
| <i>Carlina salicifolia</i> (L.f.) Cav.                   | Asteraceae    | Acc      | Acc  | Acc  | Acc | Acc | Acc  | Acc | 1        | 1 |   | 1 | 1 | 1 |   |   |                | S      |            |            |
| <i>Carlina texedae</i> Marrero Rodr.                     | Asteraceae    | Acc      | Acc  | Acc  | Syn | Acc | Acc  | Syn | 0        |   |   |   |   | 1 |   |   | C              | S      |            |            |
| <i>Carlina xeranthemoides</i> L.f.                       | Asteraceae    | Acc      | Acc  | Acc  | Acc | Acc | Acc  | Acc | 1        |   |   |   | 1 |   |   |   | T              | S      |            |            |
| <i>Caroxylon tetrandrum</i> (Forssk.) Akhani & Roalson   | Amaranthaceae | Acc      | Acc  | Acc  | Syn | Acc | Acc  | Syn | 5        |   |   |   |   |   | 1 | 1 |                | P      |            |            |
| <i>Caroxylon vermiculatum</i> (L.) Akhani & Roalson      | Amaranthaceae | Acc      | Acc  | Acc  | Syn | Syn | Syn  | Syn | 15       |   |   |   | 1 | 1 | 1 | 1 |                | P      |            |            |
| <i>Carpobrotus acinaciformis</i> (L.) L.Bolus            | Aizoaceae     | Acc      | Acc  | Acc  | Acc | Acc | Acc  | Acc | 9        |   |   |   |   | 1 |   |   |                |        | I          | O          |
| <i>Carpobrotus edulis</i> (L.) N.E.Br.                   | Aizoaceae     | Acc      | Acc  | Acc  | Acc | Acc | Acc  | Acc | 3        |   | 1 | 1 | 1 | 1 | 1 | 1 |                |        | I          | O          |
| <i>Carrichtera annua</i> (L.) DC.                        | Brassicaceae  | Acc      | Acc  | Acc  | Acc | Acc | Acc  | Acc | 2        | 1 |   | 1 | 1 | 1 | 1 | 1 |                | P      |            |            |
| <i>Carthamus caeruleus</i> L.                            | Asteraceae    | Syn      | Syn  | Acc  | Acc | Syn | Syn  | Acc | 14       |   | 1 |   | 1 | 1 | 1 | 1 |                | P      |            |            |
| <i>Carthamus lanatus</i> L.                              | Asteraceae    | Acc      | Acc  | Acc  | Acc | Acc | Acc  | Acc | 6        |   | 1 | 1 | 1 | 1 | 1 | 1 |                |        | P          |            |
| <i>Carthamus tinctorius</i> L.                           | Asteraceae    | Acc      | Acc  | Acc  | Acc | Acc | Acc  | Acc | 5        |   | 1 |   | 1 | 1 | 1 |   |                |        | S          | C          |

| Species Name                                                     | Family        | Atlantis | Muer | POWO | WFO  | COL | GBIF | TRY | POWO Syn | H | P | G | T | C | F | L | Endemic Status | Native | Non native | Ornam Crop |
|------------------------------------------------------------------|---------------|----------|------|------|------|-----|------|-----|----------|---|---|---|---|---|---|---|----------------|--------|------------|------------|
| <i>Cascabela thevetia</i> (L.) Lippold                           | Apocynaceae   | NL       | Acc  | Acc  | Acc  | Acc | Acc  | Acc | 11       |   | 1 |   | 1 | 1 |   |   |                |        | S          | O          |
| <i>Castanea sativa</i> Mill.                                     | Fagaceae      | Acc      | Acc  | Acc  | Acc  | Acc | Acc  | Acc | 5        | 1 | 1 | 1 | 1 | 1 |   |   |                |        | I          | C          |
| <i>Castellia tuberculosa</i> (Moris) Bor                         | Poaceae       | Acc      | Acc  | Acc  | Acc  | Acc | Acc  | Acc | 6        |   | 1 | 1 | 1 | 1 | 1 | 1 |                | P      |            |            |
| <i>Casuarina cunninghamiana</i> Miq.                             | Casuarinaceae | Acc      | Acc  | Acc  | Acc  | Acc | Acc  | Acc | 0        |   | 1 |   | 1 |   |   |   |                |        | S          | O          |
| <i>Casuarina equisetifolia</i> L.                                | Casuarinaceae | Acc      | Acc  | Acc  | Acc  | Acc | Acc  | Acc | 1        |   |   |   | 1 | 1 | 1 |   |                |        | S          | O          |
| <i>Casuarina glauca</i> Sieber ex Spreng.                        | Casuarinaceae | Acc      | NL   | Acc  | Acc  | Acc | Acc  | Acc | 1        | 1 |   |   | 1 | 1 | 1 | 1 |                |        | S          | O          |
| <i>Catapodium marinum</i> (L.) C.E.Hubb.                         | Poaceae       | Acc      | Acc  | Acc  | Acc  | Acc | Acc  | Acc | 22       |   |   |   |   |   | 1 | 1 |                | P      |            |            |
| <i>Catapodium rigidum</i> (L.) C.E.Hubb.                         | Poaceae       | Acc      | Acc  | Acc  | Acc  | Acc | Acc  | Acc | 8        | 1 | 1 | 1 | 1 | 1 | 1 | 1 |                | P      |            |            |
| <i>Catharanthus roseus</i> (L.) G. Don                           | Apocynaceae   | Acc      | Acc  | Acc  | Acc  | Acc | Acc  | Acc | 5        | 1 | 1 |   | 1 | 1 | 1 | 1 |                |        | S          | O          |
| <i>Cedronella canariensis</i> (L.) Webb & Berthel.               | Lamiaceae     | Acc      | Acc  | Acc  | Acc  | Acc | Acc  | Acc | 6        | 1 | 1 | 1 | 1 | 1 |   |   |                | S      |            |            |
| <i>Ceiba pentandra</i> (L.) Gaertn.                              | Malvaceae     | NL       | NL   | Acc  | Acc  | Acc | Acc  | Acc | 22       |   |   |   | 1 |   |   |   |                |        | S          | C          |
| <i>Celtis australis</i> L.                                       | Ulmaceae      | Acc      | Acc  | Acc  | Acc  | Acc | Acc  | Acc | 7        |   |   | 1 |   | 1 |   |   |                |        | S          | O          |
| <i>Cenchrus americanus</i> (L.) Morrone                          | Poaceae       | NL       | Syn  | Acc  | AmUn | Acc | Acc  | Syn | 58       |   | 1 |   | 1 | 1 |   |   |                |        | S          | O          |
| <i>Cenchrus ciliaris</i> L.                                      | Poaceae       | Acc      | Acc  | Acc  | Acc  | Acc | Acc  | Acc | 20       | 1 | 1 | 1 | 1 | 1 | 1 | 1 |                | P      |            | O          |
| <i>Cenchrus clandestinus</i> (Hochst. ex Chiov.) Morrone         | Poaceae       | Acc      | NL   | Acc  | NL   | Acc | Acc  | Syn | 3        |   | 1 | 1 | 1 | 1 | 1 |   |                |        | I          | O          |
| <i>Cenchrus divisus</i> (J.F.Gmel.) Verloove, Govaerts & Buttler | Poaceae       | NL       | NL   | Acc  | NL   | Acc | Acc  | NL  | 9        |   |   |   | 1 | 1 |   |   |                |        | S          | O          |
| <i>Cenchrus echinatus</i> L.                                     | Poaceae       | Acc      | NL   | Acc  | Acc  | Acc | Acc  | Acc | 10       |   |   |   |   | 1 |   |   |                |        | I          | O          |
| <i>Cenchrus geniculatus</i> Thunb.                               | Poaceae       | Acc      | NL   | Acc  | Syn  | Acc | Acc  | NL  | 12       |   | 1 |   | 1 |   |   |   |                |        | S          | O          |
| <i>Cenchrus longisetus</i> M.C. Johnst.                          | Poaceae       | Acc      | Syn  | Acc  | Syn  | Acc | Acc  | Syn | 3        |   | 1 |   | 1 | 1 |   |   |                |        | S          | O          |
| <i>Cenchrus orientalis</i> (Rich.) Morrone                       | Poaceae       | Acc      | NL   | Acc  | Syn  | Acc | Acc  | Syn | 12       |   | 1 |   | 1 | 1 |   |   |                |        | I          | O          |
| <i>Cenchrus purpureus</i> (Schumach.) Morrone                    | Poaceae       | Acc      | Syn  | Acc  | AmUn | Acc | Acc  | Syn | 13       |   | 1 | 1 | 1 | 1 |   | 1 |                |        | I          | O          |
| <i>Cenchrus setaceus</i> (Forssk.) Morrone                       | Poaceae       | Acc      | Syn  | Acc  | AmUn | Acc | Acc  | Syn | 10       | 1 | 1 | 1 | 1 | 1 | 1 | 1 |                |        | I          | O          |
| <i>Centaurea aspera</i> L.                                       | Asteraceae    | Acc      | Acc  | Acc  | Acc  | Acc | Acc  | Acc | 7        |   |   |   |   | 1 |   |   |                | P      |            |            |
| <i>Centaurea bimorpha</i> Viv.                                   | Asteraceae    | Acc      | NL   | Acc  | Acc  | Acc | Acc  | NL  | 4        |   |   |   |   |   |   | 1 |                |        | S          |            |

| Species Name                                              | Family           | Atlantis | Muer | POWO | WFO | COL | GBIF | TRY | POWO Syn | H | P | G | T | C | F | L | Endemic Status | Native | Non native | Ornam Crop |
|-----------------------------------------------------------|------------------|----------|------|------|-----|-----|------|-----|----------|---|---|---|---|---|---|---|----------------|--------|------------|------------|
| <i>Centaurea calcitrapa</i> L.                            | Asteraceae       | Acc      | Acc  | Acc  | Acc | Acc | Acc  | Acc | 5        | 1 |   | 1 | 1 | 1 | 1 | 1 |                | P      |            |            |
| <i>Centaurea conocephala</i> Bolle                        | Asteraceae       | Acc      | NL   | Acc  | Acc | Acc | Acc  | NL  | 0        |   |   |   | 1 |   |   |   | T              | S      |            |            |
| <i>Centaurea diluta</i> Aiton                             | Asteraceae       | Acc      | Acc  | Acc  | Acc | Acc | Acc  | Acc | 0        |   |   | 1 | 1 |   |   | 1 |                |        | P          |            |
| <i>Centaurea eriophora</i> L.                             | Asteraceae       | Acc      | Acc  | Acc  | Acc | Acc | Acc  | Acc | 6        |   |   |   |   |   | 1 |   |                |        | P          |            |
| <i>Centaurea gentilii</i> Braun-Blanq. & Maire            | Asteraceae       | Syn      | Acc  | Acc  | Syn | Syn | Syn  | Syn | 3        |   |   |   |   | 1 |   |   |                | P      |            |            |
| <i>Centaurea melitensis</i> L.                            | Asteraceae       | Acc      | Acc  | Acc  | Acc | Acc | Acc  | Acc | 15       | 1 | 1 | 1 | 1 | 1 | 1 | 1 |                | P      |            |            |
| <i>Centaurium erythraea</i> Rafn                          | Gentianaceae     | Acc      | Acc  | Acc  | Acc | Acc | Acc  | Acc | 36       | 1 | 1 |   | 1 | 1 |   |   |                |        | P          |            |
| <i>Centaurium maritimum</i> (L.) Fritsch                  | Gentianaceae     | Acc      | Acc  | Acc  | Acc | Acc | Acc  | Acc | 16       |   |   |   |   | 1 |   |   |                |        | P          |            |
| <i>Centaurium pulchellum</i> (Sw.) Druce                  | Gentianaceae     | NL       | NL   | Acc  | Acc | Acc | Acc  | Acc | 49       |   | 1 | 1 | 1 | 1 |   | 1 |                |        | P          |            |
| <i>Centaurium tenuiflorum</i> (Hoffmanns. & Link) Fritsch | Gentianaceae     | Acc      | Acc  | Acc  | Acc | Acc | Acc  | Acc | 5        | 1 | 1 | 1 | 1 | 1 | 1 | 1 |                |        | P          |            |
| <i>Centratherum punctatum</i> Cass.                       | Asteraceae       | NL       | NL   | Acc  | Acc | Acc | Acc  | Acc | 41       |   | 1 |   |   |   |   |   |                |        | S          |            |
| <i>Cerastium arvense</i> L.                               | Caryophyllaceae  | Acc      | Acc  | Acc  | Acc | Acc | Acc  | Acc | 36       |   |   | 1 | 1 | 1 |   |   |                | P      |            |            |
| <i>Cerastium fontanum</i> Baumg.                          | Caryophyllaceae  | Acc      | NL   | Acc  | Acc | Acc | Acc  | Acc | 8        |   | 1 |   | 1 | 1 |   |   |                | P      |            |            |
| <i>Cerastium glomeratum</i> Thuill.                       | Caryophyllaceae  | Acc      | Acc  | Acc  | Acc | Acc | Acc  | Acc | 33       | 1 | 1 | 1 | 1 | 1 | 1 | 1 |                | P      |            |            |
| <i>Cerastium holosteoides</i> Fr.                         | Caryophyllaceae  | Syn      | Syn  | Acc  | Syn | Acc | Acc  | Syn | 44       |   |   |   | 1 | 1 |   |   |                | P      |            |            |
| <i>Cerastium sventenii</i> Jals                           | Caryophyllaceae  | Acc      | Acc  | Acc  | Acc | Acc | Acc  | NL  | 0        | 1 | 1 |   | 1 |   |   |   | A              | S      |            |            |
| <i>Ceratocarpus heterocarpus</i> Durand                   | Papaveraceae     | Acc      | Acc  | Acc  | Acc | Acc | Acc  | NL  | 2        |   |   |   |   |   | 1 |   |                | P      |            |            |
| <i>Ceratonis siliqua</i> L.                               | Fabaceae         | Acc      | Acc  | Acc  | Acc | Acc | Acc  | Acc | 2        | 1 |   | 1 | 1 | 1 | 1 | 1 |                |        | P          | C          |
| <i>Ceratophyllum demersum</i> L.                          | Ceratophyllaceae | Acc      | Acc  | Acc  | Acc | Acc | Acc  | Acc | 2        |   |   |   | 1 |   |   |   |                |        | S          |            |
| <i>Cereus hildmannianus</i> K.Schum.                      | Cactaceae        | NL       | NL   | Acc  | Acc | Acc | Acc  | Acc | 33       |   |   |   | 1 |   |   |   |                |        | S          | O          |
| <i>Ceropegia dichotoma</i> Haw.                           | Asclepiadaceae   | Acc      | Acc  | Acc  | Acc | Acc | Acc  | Acc | 0        | 1 | 1 | 1 | 1 |   |   |   | A              | S      |            |            |
| <i>Ceropegia fusca</i> Bolle                              | Asclepiadaceae   | Acc      | Acc  | Acc  | Acc | Acc | Acc  | Acc | 1        |   |   |   | 1 | 1 |   |   | A              | S      |            |            |
| <i>Cestrum aurantiacum</i> Lindl.                         | Solanaceae       | Acc      | Acc  | Acc  | Acc | Acc | Acc  | Acc | 14       |   | 1 | 1 | 1 | 1 |   |   |                |        | S          |            |
| <i>Cestrum parqui</i> (Lam.) L'Hér.                       | Solanaceae       | Acc      | Acc  | Acc  | Acc | Acc | Acc  | Acc | 20       |   |   |   | 1 |   |   | 1 |                |        | I          |            |

| Species Name                                                    | Family          | Atlantis | Muer | POWO | WFO | COL  | GBIF | TRY | POWO Syn | H | P | G | T | C | F | L | Endemic Status | Native | Non native | Ornam Crop |
|-----------------------------------------------------------------|-----------------|----------|------|------|-----|------|------|-----|----------|---|---|---|---|---|---|---|----------------|--------|------------|------------|
| <i>Chaenorhinum minus</i> (L.) Lange                            | Plantaginaceae  | NL       | NL   | Acc  | Acc | Acc  | Acc  | Acc | 10       |   | 1 |   |   |   |   |   |                |        | S          |            |
| <i>Chaetonychchia cymosa</i> (L.) Sweet                         | Caryophyllaceae | Acc      | Acc  | Acc  | Acc | Acc  | Acc  | Acc | 8        |   |   |   |   | 1 |   |   |                |        | P          |            |
| <i>Chamaecrista fasciculata</i> (Michx.) Greene                 | Fabaceae        | Acc      | Acc  | Acc  | Acc | Acc  | Acc  | Acc | 45       | 1 |   |   |   |   |   |   |                |        | S          | O          |
| <i>Chamaecytisus mollis</i> (Cav.) Greuter & Burdet             | Fabaceae        | Acc      | NL   | Acc  | Acc | AmUn | Syn  | NL  | 5        |   |   |   | 1 |   |   |   |                | P      |            |            |
| <i>Chamaecytisus prolifer</i> (L.f.) Link                       | Fabaceae        | Syn      | Syn  | Acc  | Acc | Syn  | Acc  | Acc | 7        | 1 | 1 | 1 | 1 | 1 |   |   | A              | S      |            |            |
| <i>Chamaemelum fuscatum</i> (Brot.) Vasc.                       | Asteraceae      | Acc      | Acc  | Acc  | Acc | Acc  | Acc  | Acc | 9        |   |   |   | 1 |   |   |   |                |        | S          |            |
| <i>Chamaerops humilis</i> L.                                    | Arecaeae        | NL       | NL   | Acc  | Acc | Acc  | Acc  | Acc | 1        |   | 1 |   | 1 | 1 |   |   |                |        | S          | O          |
| <i>Chasmanthe aethiopica</i> (L.) N.E.Br.                       | Iridaceae       | Acc      | Acc  | Acc  | Acc | Acc  | Acc  | Acc | 11       |   | 1 | 1 | 1 | 1 |   |   |                |        | I          | O          |
| <i>Chasmanthe bicolor</i> (Gasp.) N. E. Br.                     | Iridaceae       | Acc      | NL   | Acc  | Acc | Acc  | Acc  | Acc | 2        |   |   |   |   | 1 |   |   |                |        | S          | O          |
| <i>Chasmanthe floribunda</i> (Salisb.) N. E. Br.                | Iridaceae       | Acc      | NL   | Acc  | Acc | Acc  | Acc  | Acc | 2        |   | 1 |   |   | 1 |   |   |                |        | S          | O          |
| <i>Cheilanthes tirajanae</i> T.S. Velazquez                     | Pteridaceae     | Acc      | Acc  | AmUn | NL  | Syn  | Syn  | NL  | 0        |   |   |   |   | 1 |   |   | C              | S      |            |            |
| <i>Cheirolophus anagaensis</i> Santos                           | Asteraceae      | NL       | NL   | NL   | NL  | AmUn | Acc  | NL  |          |   |   |   | 1 |   |   |   | T              | S      |            |            |
| <i>Cheirolophus arboreus</i> (Webb & Berthel.) Holub            | Asteraceae      | Acc      | Acc  | Acc  | Acc | Acc  | Acc  | Acc | 2        |   | 1 |   |   |   |   |   | P              | S      |            |            |
| <i>Cheirolophus arbutifolius</i> (Svent.) G.Kunkel              | Asteraceae      | Acc      | Acc  | Acc  | Acc | Acc  | Acc  | Acc | 1        |   |   |   |   | 1 |   |   | C              | S      |            |            |
| <i>Cheirolophus burchardii</i> Susanna                          | Asteraceae      | Syn      | Acc  | Acc  | Acc | Acc  | Acc  | NL  | 3        |   |   |   | 1 |   |   |   | T              | S      |            |            |
| <i>Cheirolophus canariensis</i> (Brouss. ex Willd.) Holub       | Asteraceae      | Acc      | Acc  | Acc  | Acc | Acc  | Acc  | Acc | 3        |   |   |   | 1 |   |   |   | T              | S      |            |            |
| <i>Cheirolophus dariasii</i> (Svent.) Bramwell                  | Asteraceae      | Acc      | Acc  | Acc  | Acc | Acc  | Acc  | NL  | 2        |   |   | 1 |   |   |   |   | G              | S      |            |            |
| <i>Cheirolophus duranii</i> (Burchard) Holub                    | Asteraceae      | Acc      | Acc  | Acc  | Acc | Acc  | Acc  | NL  | 1        | 1 |   |   |   |   |   |   | H              | S      |            |            |
| <i>Cheirolophus falcisectus</i> Svent. ex Montelongo & Moraleda | Asteraceae      | Acc      | Acc  | Acc  | Acc | Acc  | Acc  | Acc | 0        |   |   |   |   | 1 |   |   | C              | S      |            |            |
| <i>Cheirolophus ghomerythus</i> (Svent.) Holub                  | Asteraceae      | Acc      | Acc  | Acc  | Acc | Acc  | Acc  | NL  | 1        |   |   | 1 |   |   |   |   | G              | S      |            |            |
| <i>Cheirolophus junonianus</i> (Svent.) Holub                   | Asteraceae      | Acc      | Acc  | Acc  | Acc | Acc  | Acc  | Acc | 1        |   | 1 |   |   |   |   |   | P              | S      |            |            |
| <i>Cheirolophus metlesicsii</i> Parada                          | Asteraceae      | Acc      | Acc  | Acc  | Acc | Acc  | Acc  | NL  | 0        |   |   |   | 1 |   |   |   | T              | S      |            |            |
| <i>Cheirolophus puntallanensis</i> A. Santos                    | Asteraceae      | NL       | Acc  | NL   | NL  | Acc  | Acc  | NL  |          |   | 1 |   |   |   |   |   | P              | S      |            |            |
| <i>Cheirolophus santos-abreui</i> A.Santos                      | Asteraceae      | Acc      | Acc  | Acc  | Acc | Acc  | Acc  | NL  | 0        |   | 1 |   |   |   |   |   | P              | S      |            |            |

| Species Name                                                       | Family        | Atlantis | Muer | POWO | WFO | COL | GBIF | TRY | POWO Syn | H | P | G | T | C | F | L | Endemic Status | Native | Non native | Ornam Crop |
|--------------------------------------------------------------------|---------------|----------|------|------|-----|-----|------|-----|----------|---|---|---|---|---|---|---|----------------|--------|------------|------------|
| <i>Cheirolophus satarataensis</i> (Svent.) Holub                   | Asteraceae    | Acc      | Acc  | Acc  | Acc | Acc | Acc  | NL  | 1        |   |   | 1 |   |   |   |   | G              | S      |            |            |
| <i>Cheirolophus sventenii</i> (A.Santos) G.Kunkel                  | Asteraceae    | Acc      | Acc  | Acc  | Acc | Acc | Acc  | Acc | 0        |   | 1 |   |   |   |   |   | P              | S      |            |            |
| <i>Cheirolophus tagananensis</i> (Svent.) Holub                    | Asteraceae    | Acc      | Acc  | Acc  | Acc | Acc | Acc  | NL  | 1        |   |   |   | 1 |   |   |   | T              | S      |            |            |
| <i>Cheirolophus teydis</i> (C.Sm.) G.López                         | Asteraceae    | Acc      | Acc  | Acc  | Acc | Acc | Acc  | Acc | 5        |   | 1 |   | 1 |   |   |   | A              | S      |            |            |
| <i>Cheirolophus webbianus</i> (Sch.Bip.) Holub                     | Asteraceae    | Acc      | Acc  | Acc  | Acc | Acc | Acc  | NL  | 2        |   |   |   | 1 |   |   |   | T              | S      |            |            |
| <i>Chelidonium majus</i> L.                                        | Papaveraceae  | Acc      | Acc  | Acc  | Acc | Acc | Acc  | Acc | 12       | 1 |   |   | 1 | 1 |   |   |                | S      |            |            |
| <i>Chenopodiastrum coronopus</i> (Moq.) S.Fuentes, Uotila & Borsch | Amaranthaceae | Acc      | Acc  | Acc  | Syn | Acc | Acc  | Syn | 2        | 1 | 1 |   | 1 | 1 |   |   | A              | S      |            |            |
| <i>Chenopodiastrum murale</i> (L.) S.Fuentes, Uotila & Borsch      | Amaranthaceae | Acc      | Acc  | Acc  | Syn | Acc | Acc  | Acc | 19       | 1 | 1 | 1 | 1 | 1 | 1 | 1 |                | P      |            |            |
| <i>Chenopodium album</i> L.                                        | Amaranthaceae | Acc      | Acc  | Acc  | Acc | Acc | Acc  | Acc | 88       | 1 | 1 | 1 | 1 | 1 | 1 | 1 |                | P      |            |            |
| <i>Chenopodium giganteum</i> D.Don                                 | Amaranthaceae | Acc      | Acc  | Acc  | Acc | Acc | Acc  | Acc | 10       |   |   |   | 1 | 1 | 1 |   |                |        | P          |            |
| <i>Chenopodium nutans</i> (R.Br.) S.Fuentes & Borsch               | Amaranthaceae | Acc      | Acc  | Acc  | Syn | Acc | Acc  | Syn | 6        |   | 1 |   | 1 | 1 |   |   |                |        | I          |            |
| <i>Chenopodium opulifolium</i> Schrad. ex W.D.J.Koch & Ziz         | Amaranthaceae | NL       | NL   | Acc  | Acc | Acc | Acc  | Acc | 5        |   | 1 |   |   |   |   |   |                |        | S          |            |
| <i>Chenopodium probstii</i> Aellen                                 | Amaranthaceae | Acc      | NL   | Syn  | Syn | Acc | Acc  | Syn |          |   | 1 |   | 1 |   |   |   |                |        | S          |            |
| <i>Chenopodium vulvaria</i> L.                                     | Amaranthaceae | Acc      | Acc  | Acc  | Acc | Acc | Acc  | Acc | 4        | 1 |   |   | 1 |   |   |   |                | P      |            |            |
| <i>Chloris barbata</i> Sw.                                         | Poaceae       | Acc      | NL   | Acc  | Acc | Acc | Acc  | Acc | 4        |   |   |   | 1 |   |   |   |                |        | S          |            |
| <i>Chloris gayana</i> Kunth                                        | Poaceae       | Acc      | Acc  | Acc  | Acc | Acc | Acc  | Acc | 4        |   |   |   | 1 |   |   |   |                |        | P          |            |
| <i>Chloris pycnothrix</i> Trin.                                    | Poaceae       | Acc      | NL   | Acc  | Acc | Acc | Acc  | Acc | 10       |   | 1 |   |   |   |   |   |                |        | S          |            |
| <i>Chloris truncata</i> R.Br.                                      | Poaceae       | Acc      | Acc  | Acc  | Acc | Acc | Acc  | Acc | 3        |   |   |   | 1 |   |   |   |                |        | P          |            |
| <i>Chlorophytum comosum</i> (Thunb.) Jacques                       | Asparagaceae  | Acc      | NL   | Acc  | Acc | Acc | Acc  | Acc | 31       |   | 1 |   | 1 | 1 |   |   |                |        | S          | O          |
| <i>Chondrilla juncea</i> L.                                        | Asteraceae    | Acc      | Acc  | Acc  | Acc | Acc | Acc  | Acc | 18       |   |   |   | 1 |   |   |   |                |        | P          |            |
| <i>Chrysojasminum odoratissimum</i> (L.) Banfi                     | Oleaceae      | Syn      | Syn  | Acc  | Syn | Acc | Acc  | Syn | 5        | 1 | 1 | 1 | 1 | 1 | 1 |   |                | S      |            | O          |
| <i>Cicer arietinum</i> L.                                          | Fabaceae      | Acc      | Acc  | Acc  | Acc | Acc | Acc  | Acc | 7        |   |   |   | 1 |   | 1 | 1 |                |        | S          |            |
| <i>Cicer canariense</i> A.Santos & G.P.Lewis                       | Fabaceae      | Acc      | Acc  | Acc  | Acc | Acc | Acc  | Acc | 0        |   | 1 |   | 1 |   |   |   | A              | S      |            |            |

| Species Name                                                   | Family        | Atlantis | Muer | POWO | WFO | COL  | GBIF | TRY | POWO Syn | H | P | G | T | C | F | L | Endemic Status | Native | Non native | Ornam Crop |
|----------------------------------------------------------------|---------------|----------|------|------|-----|------|------|-----|----------|---|---|---|---|---|---|---|----------------|--------|------------|------------|
| <i>Cichorium pumilum</i> Jacq.                                 | Asteraceae    | Acc      | Acc  | Acc  | Acc | Acc  | Acc  | Acc | 13       | 1 | 1 | 1 | 1 | 1 | 1 | 1 |                |        | P          |            |
| <i>Cirsium vulgare</i> (Savi) Ten.                             | Asteraceae    | Acc      | Acc  | Acc  | Acc | Acc  | Acc  | Acc | 7        |   |   |   | 1 |   |   |   |                |        | S          |            |
| <i>Cistanche phelypaea</i> (L.) Cout.                          | Orobanchaceae | Acc      | Acc  | Acc  | Acc | AmUn | Acc  | Acc | 10       |   |   |   | 1 |   | 1 | 1 |                | P      |            |            |
| <i>Cistus asper</i> Demoly & R.Mesa                            | Cistaceae     | Acc      | Acc  | Acc  | Acc | Acc  | Acc  | NL  | 0        | 1 |   |   |   |   |   |   | H              | S      |            |            |
| <i>Cistus chinamadensis</i> Bañares & P.Romero                 | Cistaceae     | Acc      | Acc  | Acc  | Acc | Acc  | Acc  | Acc | 1        |   |   |   | 1 |   |   |   | T              | S      |            |            |
| <i>Cistus grancanariae</i> Marrero Rodr., R.S.Almeida & C.Ríos | Cistaceae     | Acc      | Acc  | Acc  | Acc | Acc  | Acc  | NL  | 0        |   |   |   |   | 1 |   |   | C              | S      |            |            |
| <i>Cistus horrens</i> Demoly                                   | Cistaceae     | Acc      | Acc  | Acc  | Acc | Acc  | Acc  | NL  | 0        |   |   |   |   | 1 |   |   | C              | S      |            |            |
| <i>Cistus ladanifer</i> L.                                     | Cistaceae     | Acc      | Acc  | Acc  | Acc | Acc  | Acc  | Acc | 10       |   |   |   | 1 | 1 |   |   |                |        | S          |            |
| <i>Cistus monspeliensis</i> L.                                 | Cistaceae     | Acc      | Acc  | Acc  | Acc | Acc  | Acc  | Acc | 8        | 1 | 1 | 1 | 1 | 1 |   |   |                | P      |            |            |
| <i>Cistus ochreatus</i> C. Sm. ex Buch                         | Cistaceae     | Acc      | Syn  | Acc  | NL  | Syn  | Syn  | NL  | 0        |   |   |   |   | 1 |   |   | C              | S      |            |            |
| <i>Cistus osbeckiifolius</i> Webb ex Christ                    | Cistaceae     | Acc      | Acc  | Acc  | Acc | Acc  | Acc  | Acc | 1        |   |   |   | 1 |   |   |   | T              | S      |            |            |
| <i>Cistus palmensis</i> Bañares & Demoly                       | Cistaceae     | Acc      | Acc  | Acc  | Acc | Acc  | Acc  | NL  | 0        |   | 1 |   |   |   |   |   | P              | S      |            |            |
| <i>Cistus symphytifolius</i> Lam.                              | Cistaceae     | Acc      | Acc  | Acc  | Acc | Acc  | Acc  | Acc | 7        |   | 1 |   | 1 |   |   |   | A              | S      |            |            |
| <i>Citrullus colocynthis</i> (L.) Schrad.                      | Cucurbitaceae | Acc      | Acc  | Acc  | Acc | Acc  | Acc  | Acc | 10       |   | 1 |   | 1 | 1 | 1 | 1 |                | P      |            | C          |
| <i>Citrullus lanatus</i> (Thunb.) Matsum. & Nakai              | Cucurbitaceae | NL       | NL   | Acc  | Acc | Acc  | Acc  | Acc | 6        | 1 | 1 | 1 | 1 | 1 | 1 | 1 |                |        | S          | C          |
| <i>Cladanthus mixtus</i> (L.) Chevall.                         | Asteraceae    | Acc      | Acc  | Acc  | Acc | Acc  | Acc  | Acc | 15       | 1 | 1 | 1 | 1 | 1 |   |   |                | P      |            |            |
| <i>Cladium mariscus</i> (L.) Pohl                              | Cyperaceae    | Acc      | Acc  | Acc  | Acc | Acc  | Acc  | Acc | 2        |   |   |   |   | 1 |   |   |                | P      |            |            |
| <i>Cleistocactus hyalacanthus</i> (K.Schum.) Rol.-Goss.        | Cactaceae     | NL       | NL   | Acc  | Acc | Syn  | Acc  | Acc | 12       |   |   |   | 1 |   |   |   |                | S      |            | O          |
| <i>Cleistocactus strausii</i> (Heese) Backeb.                  | Cactaceae     | NL       | NL   | Acc  | Acc | Syn  | Acc  | Acc | 8        |   |   |   | 1 |   |   |   |                | S      |            | O          |
| <i>Clinopodium nepeta</i> (L.) Kuntze                          | Lamiaceae     | Syn      | NL   | Acc  | Acc | Acc  | Acc  | Acc | 8        | 1 | 1 | 1 | 1 | 1 |   |   |                | P      |            | O          |
| <i>Cneorum pulverulentum</i> Vent                              | Rutaceae      | Syn      | Syn  | Acc  | Acc | Acc  | Acc  | Acc | 2        | 1 | 1 | 1 | 1 | 1 |   |   | A              | P      |            |            |
| <i>Coccoloba uvifera</i> (L.) L.                               | Polygonaceae  | Acc      | NL   | Acc  | Acc | Acc  | Acc  | Acc | 3        |   | 1 | 1 | 1 | 1 | 1 | 1 |                |        | S          | O          |
| <i>Codiaeum variegatum</i> (L.) Rumph. ex A.Juss.              | Euphorbiaceae | NL       | NL   | Acc  | Acc | Acc  | Acc  | Acc | 5        |   | 1 |   |   | 1 |   |   |                |        | S          | O          |
| <i>Coffea arabica</i> L.                                       | Rubiaceae     | Acc      | Acc  | Acc  | Acc | Acc  | Acc  | Acc | 6        |   |   |   |   | 1 |   |   |                |        | S          | C          |

| Species Name                                               | Family         | Atlantis | Muer | POWO | WFO  | COL | GBIF | TRY | POWO Syn | H | P | G | T | C | F | L | Endemic Status | Native | Non native | Ornam Crop |
|------------------------------------------------------------|----------------|----------|------|------|------|-----|------|-----|----------|---|---|---|---|---|---|---|----------------|--------|------------|------------|
| <i>Coix lacryma-jobi</i> L.                                | Poaceae        | Acc      | Acc  | Acc  | Acc  | Acc | Acc  | Acc | 5        |   |   |   | 1 | 1 |   | 1 |                |        | P          | O          |
| <i>Colchicum hierrense</i> (A.Santos) J.C.Manning & Vinn.  | Liliaceae      | Syn      | Syn  | Acc  | Syn  | Syn | Syn  | Syn | 3        | 1 | 1 | 1 |   |   |   |   | A              | S      |            |            |
| <i>Colchicum psammophilum</i> (Svent.) J.C.Manning & Vinn. | Liliaceae      | Syn      | Syn  | Acc  | Syn  | Syn | Syn  | Syn | 3        |   |   |   |   |   | 1 | 1 | A              | S      |            |            |
| <i>Coleostephus myconis</i> (L.) Rchb.f.                   | Asteraceae     | Acc      | Acc  | Acc  | Acc  | Acc | Acc  | Acc | 10       |   |   |   | 1 | 1 | 1 | 1 |                |        | P          |            |
| <i>Colocasia esculenta</i> (L.) Schott                     | Araceae        | Acc      | Acc  | Acc  | Acc  | Acc | Acc  | Acc | 34       |   | 1 | 1 | 1 | 1 |   |   |                |        | I          | C          |
| <i>Combretum indicum</i> (L.) DeFilipps                    | Combretaceae   | NL       | NL   | Acc  | Acc  | Acc | Acc  | Acc | 15       |   |   |   |   | 1 |   |   |                |        | S          | O          |
| <i>Commelina benghalensis</i> L.                           | Commelinaceae  | Acc      | Acc  | Acc  | Acc  | Acc | Acc  | Acc | 21       |   |   |   | 1 | 1 |   |   |                |        | S          |            |
| <i>Commelina diffusa</i> Burm.f.                           | Commelinaceae  | Acc      | Acc  | Acc  | Acc  | Acc | Acc  | Acc | 0        |   | 1 | 1 | 1 | 1 |   |   |                |        | S          |            |
| <i>Commelina latifolia</i> Hochst. ex A. Rich.             | Commelinaceae  | Acc      | NL   | Acc  | Acc  | Acc | Acc  | Acc | 0        |   | 1 |   |   |   |   |   |                |        | S          |            |
| <i>Commicarpus helenae</i> (J. A. Schult.) Meikle          | Nyctaginaceae  | Acc      | Acc  | Acc  | Syn  | Acc | Acc  | Syn | 5        |   |   |   |   |   | 1 |   |                |        | S          |            |
| <i>Conium maculatum</i> L.                                 | Apiaceae       | Acc      | Acc  | Acc  | Acc  | Acc | Acc  | Acc | 17       | 1 | 1 | 1 | 1 | 1 |   |   |                | P      |            |            |
| <i>Convolvulus althaeoides</i> L.                          | Convolvulaceae | Acc      | Acc  | Acc  | Acc  | Acc | Acc  | Acc | 1        | 1 | 1 | 1 | 1 | 1 | 1 | 1 |                | P      |            |            |
| <i>Convolvulus arvensis</i> L.                             | Convolvulaceae | Acc      | Acc  | Acc  | Acc  | Acc | Acc  | Acc | 39       | 1 | 1 | 1 | 1 | 1 | 1 | 1 |                | P      |            |            |
| <i>Convolvulus canariensis</i> L.                          | Convolvulaceae | Acc      | Acc  | Acc  | AmUn | Acc | Acc  | Acc | 5        | 1 | 1 | 1 | 1 | 1 |   |   | A              | S      |            |            |
| <i>Convolvulus caput-medusae</i> Lowe                      | Convolvulaceae | Acc      | Acc  | Acc  | AmUn | Acc | Acc  | Acc | 0        |   |   |   |   | 1 | 1 |   | A              | S      |            |            |
| <i>Convolvulus farinosus</i> L.                            | Convolvulaceae | Acc      | Acc  | Acc  | Acc  | Acc | Acc  | Acc | 9        |   |   |   | 1 |   |   |   |                |        | P          |            |
| <i>Convolvulus floridus</i> L.f.                           | Convolvulaceae | Acc      | Acc  | Acc  | AmUn | Acc | Acc  | Acc | 3        | 1 | 1 | 1 | 1 | 1 | 1 | 1 | A              | S      |            |            |
| <i>Convolvulus fruticulosus</i> Desr.                      | Convolvulaceae | Acc      | Acc  | Acc  | AmUn | Acc | Acc  | NL  | 1        | 1 | 1 |   | 1 |   |   |   | A              | S      |            |            |
| <i>Convolvulus lopezsocasii</i> Svent.                     | Convolvulaceae | Acc      | Acc  | Acc  | AmUn | Acc | Acc  | NL  | 0        |   |   |   |   |   |   | 1 | L              | S      |            |            |
| <i>Convolvulus perraudieri</i> Coss.                       | Convolvulaceae | Acc      | Acc  | Syn  | AmUn | Acc | Acc  | Acc |          |   |   |   | 1 | 1 |   |   | A              | S      |            |            |
| <i>Convolvulus scoparius</i> L. f.                         | Convolvulaceae | Acc      | Acc  | Acc  | AmUn | Acc | Acc  | Acc | 4        | 1 | 1 | 1 | 1 | 1 |   |   | A              | S      |            |            |
| <i>Convolvulus siculus</i> L.                              | Convolvulaceae | Acc      | Acc  | Acc  | AmUn | Acc | Acc  | Acc | 3        | 1 | 1 | 1 | 1 | 1 | 1 | 1 |                | P      |            |            |
| <i>Convolvulus subauriculatus</i> (Burchard) Linding.      | Convolvulaceae | Acc      | Acc  | Syn  | AmUn | Acc | Acc  | NL  |          |   |   | 1 |   |   |   |   | G              | S      |            |            |

| Species Name                                                     | Family         | Atlantis | Muer | POWO | WFO  | COL | GBIF | TRY | POWO Syn | H | P | G | T | C | F | L | Endemic Status | Native | Non native | Ornam Crop |
|------------------------------------------------------------------|----------------|----------|------|------|------|-----|------|-----|----------|---|---|---|---|---|---|---|----------------|--------|------------|------------|
| <i>Convolvulus tricolor</i> L.                                   | Convolvulaceae | Acc      | Acc  | Acc  | Acc  | Acc | Acc  | Acc | 2        |   |   |   | 1 | 1 |   |   |                | P      |            |            |
| <i>Convolvulus volubilis</i> Brouss. ex Link                     | Convolvulaceae | Acc      | Acc  | Acc  | AmUn | Acc | Acc  | NL  | 2        |   |   | 1 | 1 |   |   |   | A              | S      |            |            |
| <i>Corchorus depressus</i> (L.) Stocks                           | Malvaceae      | Acc      | Acc  | Acc  | Acc  | Acc | Acc  | Acc | 6        |   |   |   | 1 |   |   |   |                |        | S          |            |
| <i>Coriandrum sativum</i> L.                                     | Apiaceae       | Acc      | Acc  | Acc  | Acc  | Acc | Acc  | Acc | 15       | 1 |   | 1 | 1 | 1 | 1 | 1 |                |        | S          |            |
| <i>Coronilla valentina</i> L.                                    | Fabaceae       | Acc      | NL   | Acc  | Acc  | Acc | Acc  | Acc | 4        |   |   |   |   | 1 | 1 | 1 |                |        | P          |            |
| <i>Coronilla viminalis</i> Salisb.                               | Fabaceae       | Acc      | NL   | Acc  | Acc  | Acc | Acc  | Acc | 2        |   |   |   |   | 1 | 1 | 1 |                | P      |            |            |
| <i>Cortaderia selloana</i> (Schult. & Schult.f.) Asch. & Graebn. | Poaceae        | Acc      | Acc  | Acc  | Acc  | Acc | Acc  | Acc | 7        | 1 | 1 |   | 1 | 1 | 1 | 1 |                |        | I          | O          |
| <i>Corymbia citriodora</i> (Hook.) K.D.Hill & L.A.S.Johnson      | Myrtaceae      | Acc      | Acc  | Acc  | Acc  | Acc | Acc  | Acc | 6        |   |   |   |   | 1 |   |   |                |        | S          | O          |
| <i>Corymbia ficifolia</i> (F.Muell.) K.D.Hill & L.A.S.Johnson    | Myrtaceae      | Acc      | Acc  | Acc  | Acc  | Acc | Acc  | Acc | 5        | 1 | 1 | 1 | 1 | 1 |   |   |                |        | S          | O          |
| <i>Cosentinia vellea</i> (Aiton) Tod.                            | Pteridaceae    | Acc      | NL   | Acc  | Syn  | Acc | Acc  | Syn | 5        | 1 | 1 | 1 | 1 | 1 | 1 | 1 |                | S      |            |            |
| <i>Cosmos bipinnatus</i> Cav.                                    | Asteraceae     | Acc      | Acc  | Acc  | Acc  | Acc | Acc  | Acc | 16       |   |   |   | 1 | 1 |   |   |                |        | S          | O          |
| <i>Cota tinctoria</i> (L.) J.Gay                                 | Asteraceae     | Acc      | Acc  | Acc  | Acc  | Acc | Acc  | Acc | 3        |   |   |   |   | 1 |   |   |                |        | P          |            |
| <i>Cotula australis</i> (Sieber ex Spreng.) Hook.f.              | Asteraceae     | Acc      | Acc  | Acc  | Acc  | Acc | Acc  | Acc | 5        | 1 | 1 | 1 | 1 | 1 |   |   |                |        | S          |            |
| <i>Cotyledon macrantha</i> A.Berger                              | Crassulaceae   | Acc      | Acc  | Syn  | AmUn | Syn | Syn  | Syn |          |   |   |   | 1 |   |   |   |                |        | S          | O          |
| <i>Cotyledon orbiculata</i> L.                                   | Crassulaceae   | Acc      | NL   | Acc  | Acc  | Acc | Acc  | Acc | 14       |   |   | 1 | 1 | 1 |   |   |                |        | S          | O          |
| <i>Crambe arborea</i> Webb ex Christ                             | Brassicaceae   | Acc      | Acc  | Acc  | Acc  | Acc | Acc  | Acc | 0        |   |   |   | 1 |   |   |   | T              | S      |            |            |
| <i>Crambe feuilleei</i> A.Santos ex Prina & Mart.-Laborde        | Brassicaceae   | Acc      | Acc  | Acc  | Acc  | Acc | Acc  | NL  | 0        | 1 |   |   |   |   |   |   | H              | S      |            |            |
| <i>Crambe gomeraea</i> Webb ex Christ                            | Brassicaceae   | Acc      | Syn  | Acc  | Acc  | Syn | Syn  | Acc | 0        |   |   | 1 |   |   |   |   | G              | S      |            |            |
| <i>Crambe laevigata</i> DC. ex H.Christ                          | Brassicaceae   | Acc      | Acc  | Acc  | Acc  | Acc | Acc  | Acc | 0        |   |   |   | 1 |   |   |   | T              | S      |            |            |
| <i>Crambe microcarpa</i> A.Santos                                | Brassicaceae   | Acc      | Acc  | Acc  | Acc  | Acc | Acc  | NL  | 0        |   | 1 |   |   |   |   |   | P              | S      |            |            |
| <i>Crambe pritzelii</i> Bolle                                    | Brassicaceae   | Acc      | Acc  | Acc  | Acc  | Acc | Acc  | Acc | 1        |   |   |   |   | 1 |   |   | C              | S      |            |            |
| <i>Crambe santosii</i> Bramwell                                  | Brassicaceae   | Acc      | Acc  | Acc  | Acc  | Syn | NL   | Syn | 0        |   | 1 |   |   |   |   |   | P              | S      |            |            |
| <i>Crambe scaberrima</i> Webb ex Bramwell                        | Brassicaceae   | Acc      | Acc  | Acc  | Acc  | Acc | Acc  | Acc | 0        |   |   |   | 1 |   |   |   | T              | S      |            |            |



| Species Name                                                  | Family         | Atlantis | Muer | POWO | WFO  | COL | GBIF | TRY | POWO Syn | H | P | G | T | C | F | L | Endemic Status | Native | Non native | Ornam Crop |
|---------------------------------------------------------------|----------------|----------|------|------|------|-----|------|-----|----------|---|---|---|---|---|---|---|----------------|--------|------------|------------|
| <i>Crambe scoparia</i> Svent.                                 | Brassicaceae   | Acc      | Acc  | Acc  | Acc  | Acc | Acc  | NL  | 0        |   |   |   |   | 1 |   |   | C              | S      |            |            |
| <i>Crambe strigosa</i> L'Hér.                                 | Brassicaceae   | Acc      | Acc  | Acc  | Acc  | Acc | Acc  | Acc | 1        | 1 | 1 | 1 | 1 | 1 |   |   | A              | S      |            |            |
| <i>Crambe sventenii</i> Pett. ex Bramwell & Sunding           | Brassicaceae   | Acc      | Acc  | Acc  | Acc  | Acc | Acc  | Acc | 0        |   |   |   |   |   | 1 |   | F              | S      |            |            |
| <i>Crambe tamadabensis</i> Prina & Marrero Rodr.              | Brassicaceae   | Acc      | Acc  | Acc  | Acc  | Acc | Acc  | NL  | 0        |   |   |   |   | 1 |   |   | C              | S      |            |            |
| <i>Crambe wildpretii</i> Prina & Bramwell                     | Brassicaceae   | Acc      | Acc  | Acc  | Acc  | Acc | Acc  | NL  | 0        |   |   | 1 |   |   |   |   | G              | S      |            |            |
| <i>Crassula campestris</i> (Eckl. & Zeyh.) Endl.              | Crassulaceae   | Acc      | Acc  | Acc  | Acc  | Acc | Acc  | Acc | 4        | 1 | 1 | 1 | 1 | 1 |   | 1 |                |        | S          |            |
| <i>Crassula multicava</i> Lem.                                | Crassulaceae   | Acc      | Acc  | Acc  | Acc  | Acc | Acc  | Acc | 2        | 1 | 1 | 1 | 1 | 1 |   |   |                |        | I          | O          |
| <i>Crassula muscosa</i> L.                                    | Crassulaceae   | NL       | Syn  | Acc  | Acc  | Acc | Acc  | Acc | 22       | 1 | 1 | 1 | 1 | 1 |   |   |                |        | I          | O          |
| <i>Crassula ovata</i> (Mill.) Druce                           | Crassulaceae   | Acc      | Acc  | Acc  | Acc  | Acc | Acc  | Acc | 8        |   | 1 | 1 | 1 | 1 |   | 1 |                |        | S          | O          |
| <i>Crassula tetragona</i> L.                                  | Crassulaceae   | Acc      | NL   | Acc  | Acc  | Acc | Acc  | Acc | 11       |   | 1 |   | 1 |   |   |   |                |        | S          | O          |
| <i>Crassula tillaea</i> Lest.-Garl.                           | Crassulaceae   | Acc      | Acc  | Acc  | Acc  | Acc | Acc  | Acc | 4        | 1 | 1 | 1 | 1 | 1 | 1 | 1 |                | P      |            |            |
| <i>Crataegus monogyna</i> Jacq.                               | Rosaceae       | NL       | Acc  | Acc  | Acc  | Acc | Acc  | Acc | 84       |   |   |   |   | 1 |   |   |                |        | S          | O          |
| <i>Crepis bursifolia</i> L.                                   | Asteraceae     | Acc      | Acc  | Acc  | Acc  | Acc | Acc  | Acc | 9        |   |   |   | 1 |   |   |   |                |        | P          |            |
| <i>Crepis canariensis</i> (Sch.Bip. ex Sch.Bip.) Bab. ex Bab. | Asteraceae     | Acc      | Acc  | Acc  | Acc  | Acc | Acc  | Acc | 3        |   |   |   |   |   | 1 | 1 | A              | S      |            |            |
| <i>Crepis capillaris</i> (L.) Wallr.                          | Asteraceae     | Acc      | Acc  | Acc  | Acc  | Acc | Acc  | Acc | 33       |   | 1 |   | 1 | 1 |   |   |                | P      |            |            |
| <i>Crepis foetida</i> L.                                      | Asteraceae     | Acc      | Acc  | Acc  | Acc  | Acc | Acc  | Acc | 11       | 1 | 1 | 1 | 1 | 1 |   |   |                | P      |            |            |
| <i>Crepis juvenalis</i> (Delile) Bab.                         | Asteraceae     | Acc      | Syn  | Acc  | Acc  | Acc | Acc  | NL  | 2        |   |   |   | 1 |   |   |   |                | P      |            |            |
| <i>Crepis vesicaria</i> L.                                    | Asteraceae     | Syn      | Syn  | Acc  | Acc  | Acc | Acc  | Acc | 9        |   |   |   | 1 | 1 |   |   |                | P      |            |            |
| <i>Cressa cretica</i> L.                                      | Convolvulaceae | Acc      | Acc  | Acc  | Acc  | Acc | Acc  | Acc | 7        |   |   |   |   | 1 |   |   |                |        | P          |            |
| <i>Crithmum maritimum</i> L.                                  | Apiaceae       | Acc      | Acc  | Acc  | AmUn | Acc | Acc  | Acc | 2        | 1 | 1 | 1 | 1 | 1 |   |   |                | S      |            |            |
| <i>Cucurbita moschata</i> Duchesne                            | Cucurbitaceae  | NL       | NL   | Acc  | Acc  | Acc | Acc  | Acc | 14       |   | 1 | 1 | 1 | 1 | 1 | 1 |                |        | S          | C          |
| <i>Cucurbita pepo</i> L.                                      | Cucurbitaceae  | Acc      | Acc  | Acc  | Acc  | Acc | Acc  | Acc | 42       | 1 | 1 | 1 | 1 | 1 | 1 | 1 |                |        | S          | C          |
| <i>Culcita macrocarpa</i> C. Presl                            | Dicksoniaceae  | Acc      | Acc  | Acc  | AmUn | Acc | Acc  | Acc | 2        |   |   |   | 1 |   |   |   |                | S      |            |            |
| <i>Cullen americanum</i> (L.) Rydb. in Britton                | Fabaceae       | Acc      | Acc  | Acc  | Acc  | Acc | Acc  | Acc | 9        |   |   |   |   | 1 |   |   |                |        | P          |            |

| Species Name                                          | Family         | Atlantis | Muer | POWO | WFO | COL | GBIF | TRY | POWO Syn | H | P | G | T | C | F | L | Endemic Status | Native | Non native | Ornam Crop |
|-------------------------------------------------------|----------------|----------|------|------|-----|-----|------|-----|----------|---|---|---|---|---|---|---|----------------|--------|------------|------------|
| <i>Cuphea hyssopifolia</i> Kunth                      | Lythraceae     | NL       | NL   | Acc  | Acc | Acc | Acc  | Acc | 5        |   | 1 |   | 1 | 1 |   |   |                |        | S          |            |
| <i>Cupressus sempervirens</i> L.                      | Cupressaceae   | Acc      | Acc  | Acc  | Acc | Acc | Acc  | Acc | 24       | 1 |   | 1 |   | 1 |   |   |                |        | S          | O          |
| <i>Cuscuta approximata</i> Bab.                       | Cuscutaceae    | Acc      | Acc  | Acc  | Acc | Acc | Acc  | Acc | 2        |   |   |   | 1 | 1 | 1 | 1 |                | P      |            |            |
| <i>Cuscuta campestris</i> Yunck.                      | Cuscutaceae    | Acc      | Acc  | Acc  | Acc | Syn | Syn  | Acc | 5        |   |   |   |   | 1 |   |   |                | P      |            |            |
| <i>Cuscuta planiflora</i> Ten.                        | Cuscutaceae    | Acc      | Acc  | Acc  | Acc | Acc | Acc  | Acc | 1        | 1 | 1 | 1 | 1 | 1 | 1 | 1 |                | P      |            |            |
| <i>Cutandia dichotoma</i> (Forssk.) Trab.             | Poaceae        | Acc      | Acc  | Acc  | Acc | Acc | Acc  | Acc | 6        |   |   |   |   |   | 1 |   |                | P      |            |            |
| <i>Cutandia divaricata</i> (Desf.) Benth.             | Poaceae        | Acc      | Acc  | Acc  | Acc | Acc | Acc  | Acc | 9        |   |   |   |   |   |   | 1 |                | P      |            |            |
| <i>Cutandia maritima</i> (L.) Barbey                  | Poaceae        | Acc      | Acc  | Acc  | Acc | Acc | Acc  | Acc | 10       |   |   |   |   |   | 1 | 1 |                | P      |            |            |
| <i>Cutandia memphitica</i> (Spreng.) Benth.           | Poaceae        | Acc      | Acc  | Acc  | Acc | Acc | Acc  | Acc | 6        |   |   |   | 1 | 1 | 1 | 1 |                | P      |            |            |
| <i>Cyclospermum leptophyllum</i> (Pers.) Sprague      | Apiaceae       | Acc      | Acc  | Acc  | Acc | Acc | Acc  | Acc | 28       |   | 1 |   | 1 | 1 | 1 |   |                |        | S          |            |
| <i>Cydonia oblonga</i> Mill.                          | Rosaceae       | Acc      | Acc  | Acc  | Acc | Acc | Acc  | Acc | 21       | 1 |   |   | 1 |   |   |   |                |        | S          | C          |
| <i>Cylindropuntia bigelovii</i> (Engelm.) F.M. Knuth  | Cactaceae      | Acc      | NL   | Acc  | Acc | Acc | Acc  | Acc | 2        |   |   |   | 1 | 1 |   |   |                |        | S          | O          |
| <i>Cylindropuntia fulgida</i> (Engelm.) F.M. Knuth    | Cactaceae      | Acc      | NL   | Acc  | Acc | Acc | Acc  | Acc | 5        |   |   |   | 1 |   |   |   |                |        | I          | O          |
| <i>Cylindropuntia imbricata</i> (Haw.) F.M. Knuth     | Cactaceae      | Acc      | NL   | Acc  | Acc | Acc | Acc  | Acc | 20       |   |   |   |   | 1 |   |   |                |        | S          | O          |
| <i>Cylindropuntia prolifera</i> (Engelm.) F.M. Knuth  | Cactaceae      | Acc      | NL   | Acc  | Acc | Acc | Acc  | Acc | 2        |   |   |   | 1 | 1 | 1 |   |                |        | I          | O          |
| <i>Cylindropuntia tunicata</i> (Lehm.) F.M. Knuth     | Cactaceae      | Acc      | NL   | Acc  | Acc | Acc | Acc  | Acc | 15       |   |   |   | 1 |   |   |   |                |        | I          | O          |
| <i>Cymbalaria muralis</i> P.Gaertn., B.Mey. & Scherb. | Antirrhinaceae | Acc      | Acc  | Acc  | Acc | Acc | Acc  | Acc | 21       | 1 | 1 | 1 | 1 | 1 | 1 | 1 |                |        | S          |            |
| <i>Cymodocea nodosa</i> (Ucria) Ascherson             | Cymodaceae     | Acc      | NL   | Acc  | Acc | Acc | Acc  | Acc | 9        | 1 | 1 | 1 | 1 | 1 | 1 | 1 |                | S      |            |            |
| <i>Cynanchum acutum</i> L.                            | Asclepiadaceae | Acc      | Acc  | Acc  | Acc | Acc | Acc  | Acc | 2        |   |   |   |   |   | 1 | 1 |                |        | S          | O          |
| <i>Cynara cardunculus</i> L.                          | Asteraceae     | Acc      | Acc  | Acc  | Acc | Acc | Acc  | Acc | 24       | 1 | 1 | 1 | 1 | 1 | 1 | 1 |                | S      |            |            |
| <i>Cynara humilis</i> L.                              | Asteraceae     | Acc      | Acc  | Acc  | Acc | Acc | Acc  | Acc | 1        |   |   |   |   | 1 |   |   |                | P      |            |            |
| <i>Cynodon dactylon</i> (L.) Pers.                    | Poaceae        | Acc      | Acc  | Acc  | Acc | Acc | Acc  | Acc | 68       | 1 | 1 | 1 | 1 | 1 | 1 | 1 |                |        | I          |            |
| <i>Cynoglossum creticum</i> Mill.                     | Boraginaceae   | Acc      | Acc  | Acc  | Acc | Acc | Acc  | Acc | 7        |   | 1 | 1 | 1 | 1 |   |   |                | P      |            |            |
| <i>Cynomorium coccineum</i> L.                        | Balnophoraceae | Acc      | Acc  | Acc  | Acc | Acc | Acc  | Acc | 0        |   |   |   |   |   |   | 1 |                | P      |            |            |

| Species Name                               | Family          | Atlantis | Muer | POWO | WFO  | COL | GBIF | TRY | POWO Syn | H | P | G | T | C | F | L | Endemic Status | Native | Non native | Ornam Crop |
|--------------------------------------------|-----------------|----------|------|------|------|-----|------|-----|----------|---|---|---|---|---|---|---|----------------|--------|------------|------------|
| <i>Cynosurus echinatus</i> L.              | Poaceae         | Acc      | Acc  | Acc  | Acc  | Acc | Acc  | Acc | 9        | 1 | 1 | 1 | 1 | 1 |   | 1 |                | P      |            |            |
| <i>Cynosurus elegans</i> Desf.             | Poaceae         | Syn      | Acc  | Acc  | Acc  | Acc | Acc  | Acc | 16       |   |   |   | 1 | 1 |   |   |                |        | P          |            |
| <i>Cyperus alopecuroides</i> Rottb.        | Cyperaceae      | Acc      | Acc  | Acc  | Acc  | Acc | Acc  | Acc | 8        |   | 1 |   | 1 | 1 |   |   |                | P      |            |            |
| <i>Cyperus alternifolius</i> L.            | Cyperaceae      | Syn      | Syn  | Acc  | Acc  | Acc | Acc  | Acc | 2        |   | 1 | 1 | 1 | 1 |   |   |                |        | I          | O          |
| <i>Cyperus brevifolius</i> (Rottb.) Hassk. | Cyperaceae      | Acc      | Acc  | Acc  | Syn  | Acc | Acc  | NL  | 2        |   |   |   | 1 | 1 |   |   |                |        | P          | O          |
| <i>Cyperus capitatus</i> Vand.             | Cyperaceae      | Acc      | Acc  | Acc  | Acc  | Acc | Acc  | Acc | 12       |   | 1 |   | 1 | 1 | 1 | 1 |                | S      |            |            |
| <i>Cyperus eragrostis</i> Lam.             | Cyperaceae      | Acc      | Acc  | Acc  | Acc  | Acc | Acc  | Acc | 19       |   | 1 | 1 | 1 | 1 |   |   |                |        | P          | O          |
| <i>Cyperus esculentus</i> L.               | Cyperaceae      | Acc      | Acc  | Acc  | Acc  | Acc | Acc  | Acc | 42       |   | 1 |   |   |   |   |   |                |        | S          | O          |
| <i>Cyperus fuscus</i> L.                   | Cyperaceae      | Acc      | Acc  | Acc  | Acc  | Acc | Acc  | Acc | 9        |   |   |   | 1 |   |   |   |                | P      |            |            |
| <i>Cyperus gracilis</i> R.Br.              | Cyperaceae      | Acc      | NL   | Acc  | Acc  | Acc | Acc  | Acc | 2        |   |   |   | 1 |   |   |   |                | P      |            |            |
| <i>Cyperus laevigatus</i> L.               | Cyperaceae      | Acc      | NL   | Acc  | Acc  | Acc | Acc  | Acc | 4        |   | 1 | 1 | 1 | 1 | 1 | 1 |                | P      |            |            |
| <i>Cyperus longus</i> L.                   | Cyperaceae      | Acc      | Acc  | Acc  | Acc  | Acc | Acc  | Acc | 3        |   | 1 | 1 | 1 | 1 | 1 |   |                | P      |            |            |
| <i>Cyperus michelianus</i> (L.) Delile     | Cyperaceae      | Acc      | Acc  | Acc  | Acc  | Acc | Acc  | Acc | 5        |   |   |   | 1 | 1 |   |   |                | P      |            |            |
| <i>Cyperus mundii</i> (Nees) Kunth         | Cyperaceae      | Acc      | NL   | Acc  | Syn  | Acc | Acc  | Syn | 2        |   |   |   | 1 |   |   |   |                |        | P          | O          |
| <i>Cyperus polystachyos</i> Rottb.         | Cyperaceae      | Acc      | NL   | Acc  | Syn  | Acc | Acc  | Acc | 3        |   |   | 1 |   |   |   |   |                |        | P          | O          |
| <i>Cyperus rotundus</i> L.                 | Cyperaceae      | Acc      | Acc  | Acc  | Acc  | Acc | Acc  | Acc | 62       | 1 |   | 1 | 1 | 1 | 1 | 1 |                |        | S          | O          |
| <i>Cyperus rubicundus</i> Vahl             | Cyperaceae      | Acc      | Acc  | Acc  | Acc  | Acc | Acc  | Acc | 9        |   |   |   | 1 | 1 |   |   |                | S      |            |            |
| <i>Cyrtomium falcatum</i> (L. f.) C. Presl | Dryopteridaceae | Acc      | Acc  | Acc  | Acc  | Acc | Acc  | Acc | 11       |   | 1 | 1 | 1 | 1 |   | 1 |                |        | I          | O          |
| <i>Cysticapnos versicaria</i> (L.) Fedde   | Papaveraceae    | Syn      | Syn  | Acc  | AmUn | Acc | Acc  | Syn | 10       |   |   |   |   | 1 | 1 | 1 |                | P      |            |            |
| <i>Cystopteris fragilis</i> (L.) Bernh.    | Athyriaceae     | Acc      | Acc  | Acc  | Acc  | Acc | Acc  | Acc | 12       | 1 | 1 | 1 | 1 | 1 |   |   |                | S      |            |            |
| <i>Cytinus hypocistis</i> (L.) L.          | Rafflesiaceae   | Acc      | Acc  | Acc  | Acc  | Acc | Acc  | Acc | 4        | 1 | 1 | 1 | 1 | 1 |   |   |                | S      |            |            |
| <i>Cytinus ruber</i> (Fourr.) Fritsch      | Rafflesiaceae   | Acc      | Acc  | Acc  | Acc  | Syn | Acc  | Acc | 1        |   | 1 |   | 1 | 1 |   |   |                | P      |            |            |
| <i>Cytisus filipes</i> Webb                | Fabaceae        | Syn      | Acc  | Acc  | Acc  | Acc | Acc  | Acc | 1        | 1 | 1 | 1 | 1 |   |   |   | A              | S      |            |            |
| <i>Cytisus scoparius</i> (L.) Link         | Fabaceae        | Acc      | Acc  | Acc  | Acc  | Acc | Acc  | Acc | 28       |   |   | 1 | 1 |   |   |   |                |        | I          | O          |

| Species Name                                                       | Family        | Atlantis | Muer | POWO | WFO  | COL | GBIF | TRY | POWO Syn | H | P | G | T | C | F | L | Endemic Status | Native | Non native | Ornam Crop |
|--------------------------------------------------------------------|---------------|----------|------|------|------|-----|------|-----|----------|---|---|---|---|---|---|---|----------------|--------|------------|------------|
| <i>Cytisus supranubius</i> (L. f.) Kuntze                          | Fabaceae      | Syn      | Acc  | Acc  | Acc  | Acc | Acc  | Acc | 11       |   | 1 |   | 1 |   |   |   | A              | S      |            |            |
| <i>Dactylis glomerata</i> L.                                       | Poaceae       | Acc      | Acc  | Acc  | Acc  | Acc | Acc  | Acc | 5        | 1 | 1 |   | 1 | 1 |   |   |                | P      |            |            |
| <i>Dactylis metlesicsii</i> P.Schönfelder & D.Ludw.                | Poaceae       | Acc      | Acc  | NL   | Syn  | Syn | Syn  | NL  |          |   |   |   | 1 |   |   |   | T              | S      |            |            |
| <i>Dactylis smithii</i> Link.                                      | Poaceae       | Acc      | NL   | Acc  | Syn  | Acc | Acc  | Syn | 7        | 1 | 1 | 1 | 1 | 1 |   |   |                | S      |            |            |
| <i>Daphne gnidium</i> L.                                           | Thymelaeaceae | Acc      | Acc  | Acc  | Acc  | Acc | Acc  | Acc | 5        |   | 1 |   | 1 | 1 |   |   |                | S      |            |            |
| <i>Dasispermum capense</i> (Lam.) Magee & B.-E.van Wyk             | Apiaceae      | Syn      | Syn  | Acc  | Acc  | Acc | Acc  | Acc | 9        | 1 | 1 | 1 | 1 | 1 |   |   |                | P      |            |            |
| <i>Datura ferox</i> L.                                             | Solanaceae    | Acc      | NL   | Acc  | Acc  | Acc | Acc  | Acc | 1        |   |   |   | 1 |   |   |   |                |        | S          | O          |
| <i>Datura innoxia</i> Mill.                                        | Solanaceae    | Acc      | Acc  | Acc  | Acc  | Acc | Acc  | Acc | 3        |   | 1 | 1 | 1 | 1 | 1 | 1 |                |        | S          | O          |
| <i>Datura stramonium</i> L.                                        | Solanaceae    | Acc      | Acc  | Acc  | Acc  | Acc | Acc  | Acc | 29       | 1 | 1 | 1 | 1 | 1 | 1 | 1 |                |        | S          | O          |
| <i>Daucus aureus</i> Desf.                                         | Apiaceae      | Acc      | Acc  | Acc  | Acc  | Acc | Acc  | Acc | 6        |   |   |   | 1 | 1 |   |   |                | P      |            |            |
| <i>Daucus carota</i> L.                                            | Apiaceae      | Acc      | Acc  | Acc  | Acc  | Acc | Acc  | Acc | 47       | 1 | 1 | 1 | 1 | 1 | 1 |   |                | P      |            |            |
| <i>Daucus durieua</i> Lange                                        | Apiaceae      | Acc      | Acc  | Acc  | Acc  | Acc | Acc  | Acc | 5        |   |   |   | 1 |   |   |   |                |        | P          |            |
| <i>Daucus elegans</i> (Webb ex Bolle) Spalik, Banasiak & Reduron   | Apiaceae      | Acc      | Syn  | Acc  | Syn  | Acc | Acc  | Syn | 2        | 1 | 1 | 1 | 1 |   |   |   | A              | S      |            |            |
| <i>Daucus pumilus</i> (L.) Hoffmanns. & Link                       | Apiaceae      | Acc      | Syn  | Acc  | Syn  | Acc | Acc  | Syn | 18       |   |   |   |   |   |   | 1 |                |        | P          |            |
| <i>Davallia canariensis</i> (L.) Sm.                               | Davalliaceae  | Acc      | Acc  | Acc  | Acc  | Acc | Acc  | Acc | 4        | 1 | 1 | 1 | 1 | 1 | 1 | 1 |                | S      |            |            |
| <i>Delairea odorata</i> Lem.                                       | Asteraceae    | Acc      | Acc  | Acc  | Acc  | Acc | Acc  | Acc | 2        |   | 1 |   | 1 | 1 |   |   |                |        | I          | O          |
| <i>Delonix regia</i> (Hook.) Raf.                                  | Fabaceae      | NL       | NL   | Acc  | Acc  | Acc | Acc  | Acc | 3        |   | 1 |   | 1 | 1 | 1 | 1 |                |        | S          | O          |
| <i>Delosperma brunnthaleri</i> (A. Berger) Schwantes & H. Jacobsen | Aizoaceae     | Acc      | Acc  | Acc  | Acc  | Acc | Acc  | Acc | 2        |   |   |   | 1 |   |   |   |                |        | S          | O          |
| <i>Delphinium ajacis</i> L.                                        | Ranunculaceae | Syn      | Acc  | Acc  | Syn  | Acc | Syn  | Syn | 12       | 1 | 1 |   | 1 |   |   |   |                |        | S          | O          |
| <i>Delphinium consolida</i> L.                                     | Ranunculaceae | Syn      | Acc  | Acc  | Syn  | Acc | Acc  | Syn | 13       | 1 |   |   | 1 | 1 |   | 1 |                |        | S          |            |
| <i>Delphinium staphisagria</i> L.                                  | Ranunculaceae | NL       | Acc  | Acc  | Acc  | Acc | Acc  | Acc | 3        |   | 1 | 1 | 1 |   |   |   |                |        | P          | O          |
| <i>Dendriopoterium pulidoi</i> Svent.                              | Rosaceae      | Acc      | Acc  | AmUn | AmUn | Acc | Acc  | NL  | 0        |   |   |   |   | 1 |   |   | C              | S      |            |            |
| <i>Descurainia artemisioides</i> Svent.                            | Brassicaceae  | Acc      | Acc  | Acc  | Acc  | Acc | Acc  | Acc | 0        |   |   |   |   | 1 |   |   | C              | S      |            |            |

| Species Name                                                             | Family          | Atlantis | Muer | POWO | WFO  | COL  | GBIF | TRY | POWO Syn | H | P | G | T | C | F | L | Endemic Status | Native | Non native | Ornam Crop |
|--------------------------------------------------------------------------|-----------------|----------|------|------|------|------|------|-----|----------|---|---|---|---|---|---|---|----------------|--------|------------|------------|
| <i>Descurainia bourgaeana</i> (E. Fourn.) Webb                           | Brassicaceae    | Acc      | Acc  | Acc  | Acc  | Acc  | Acc  | Acc | 1        |   |   |   | 1 |   |   |   | T              | S      |            |            |
| <i>Descurainia gilva</i> Svent.                                          | Brassicaceae    | Acc      | Acc  | Acc  | Acc  | Acc  | Acc  | Acc | 0        |   | 1 |   |   |   |   |   | P              | S      |            |            |
| <i>Descurainia gonzalezii</i> Svent.                                     | Brassicaceae    | Acc      | Acc  | Acc  | Acc  | AmUn | Acc  | Syn | 0        |   |   |   | 1 |   |   |   | T              | S      |            |            |
| <i>Descurainia lemsii</i> Bramwell                                       | Brassicaceae    | Acc      | Acc  | Acc  | Acc  | Acc  | Acc  | Acc | 0        |   |   |   | 1 |   |   |   | T              | S      |            |            |
| <i>Descurainia millefolia</i> (Jacq.) Webb & Berthel.                    | Brassicaceae    | Acc      | Acc  | Acc  | Acc  | Acc  | Acc  | Acc | 3        |   | 1 | 1 | 1 |   |   |   | A              | S      |            |            |
| <i>Descurainia preauxiana</i> (Webb) Webb ex O.E.Schulz                  | Brassicaceae    | Acc      | Acc  | Acc  | Acc  | Acc  | Acc  | Acc | 3        |   |   |   |   | 1 |   |   | C              | S      |            |            |
| <i>Desmanthus virgatus</i> (L.) Willd.                                   | Fabaceae        | Syn      | Acc  | Acc  | Acc  | Acc  | Acc  | Acc | 18       |   |   |   |   | 1 | 1 |   |                |        | S          | O          |
| <i>Dianthus caryophyllus</i> L.                                          | Caryophyllaceae | NL       | NL   | Acc  | Acc  | Acc  | Acc  | Acc | 18       |   |   |   | 1 |   |   |   |                |        | S          | O          |
| <i>Dichanthium annulatum</i> (Forssk.) Stapf                             | Poaceae         | Acc      | Acc  | Acc  | Acc  | Acc  | Acc  | Acc | 5        |   |   |   | 1 |   |   |   |                | P      |            |            |
| <i>Dichanthium foveolatum</i> (Delile) Roberty                           | Poaceae         | Acc      | Acc  | Acc  | Acc  | Acc  | Acc  | Acc | 10       | 1 | 1 | 1 | 1 | 1 | 1 |   |                | P      |            |            |
| <i>Dicheranthus plocamoides</i> Webb                                     | Caryophyllaceae | Acc      | Acc  | Acc  | Acc  | Acc  | Acc  | Acc | 0        |   |   | 1 | 1 |   |   |   | A              | S      |            |            |
| <i>Dichondra micrantha</i> Urb.                                          | Convolvulaceae  | Acc      | Acc  | Acc  | Acc  | Acc  | Acc  | Acc | 0        |   | 1 |   | 1 | 1 | 1 |   |                |        | S          | O          |
| <i>Digitalis canariensis</i> L.                                          | Plantaginaceae  | Syn      | Syn  | Acc  | Syn  | Acc  | Acc  | Syn | 3        |   | 1 | 1 | 1 |   |   |   | A              | S      |            |            |
| <i>Digitalis chalcantha</i> (Svent. & O'Shan.) Albach, Bräuchler & Heubl | Plantaginaceae  | Syn      | Syn  | Acc  | AmUn | Acc  | Acc  | Syn | 1        |   |   |   |   | 1 |   |   | C              | S      |            |            |
| <i>Digitalis isabelliana</i> (Webb) Linding.                             | Plantaginaceae  | Syn      | Syn  | Acc  | Syn  | Acc  | Acc  | Syn | 2        |   |   |   |   | 1 |   |   | C              | S      |            |            |
| <i>Digitalis purpurea</i> L.                                             | Plantaginaceae  | Acc      | Acc  | Acc  | Acc  | Acc  | NL   | Acc | 16       |   | 1 |   | 1 |   |   |   |                |        | S          | O          |
| <i>Digitaria ciliaris</i> (Retz.) Koeler                                 | Poaceae         | Acc      | Acc  | Acc  | Acc  | Acc  | Acc  | Acc | 50       | 1 | 1 | 1 | 1 | 1 | 1 |   |                |        | P          |            |
| <i>Digitaria ischaemum</i> (Schreb.) Muhl.                               | Poaceae         | Acc      | NL   | Acc  | Acc  | Acc  | Acc  | Acc | 20       |   | 1 |   | 1 | 1 | 1 |   |                |        | P          |            |
| <i>Digitaria nodosa</i> Parl.                                            | Poaceae         | Acc      | Acc  | Acc  | Acc  | Acc  | Acc  | Acc | 5        |   |   |   | 1 | 1 | 1 |   |                |        | P          |            |
| <i>Digitaria nuda</i> Schumach.                                          | Poaceae         | Acc      | NL   | Acc  | Acc  | Acc  | Acc  | Acc | 13       |   | 1 |   |   |   |   |   |                |        | P          |            |
| <i>Digitaria radicata</i> (J.Presl) Miq.                                 | Poaceae         | Acc      | Acc  | Acc  | Acc  | Acc  | Acc  | Acc | 10       |   | 1 |   |   | 1 |   |   |                |        | P          |            |
| <i>Digitaria sanguinalis</i> (L.) Scop.                                  | Poaceae         | Acc      | Acc  | Acc  | Acc  | Acc  | Acc  | Acc | 53       | 1 | 1 | 1 | 1 | 1 |   | 1 |                |        | I          |            |
| <i>Digitaria setigera</i> Roth.                                          | Poaceae         | NL       | NL   | Acc  | Acc  | Acc  | Acc  | Acc | 20       |   |   |   |   | 1 |   |   |                |        | S          |            |

| Species Name                                                             | Family         | Atlantis | Muer | POWO | WFO  | COL | GBIF | TRY | POWO Syn | H | P | G | T | C | F | L | Endemic Status | Native | Non native | Ornam Crop |
|--------------------------------------------------------------------------|----------------|----------|------|------|------|-----|------|-----|----------|---|---|---|---|---|---|---|----------------|--------|------------|------------|
| <i>Digitaria violascens</i> Link                                         | Poaceae        | Acc      | Acc  | Acc  | Acc  | Acc | Acc  | Acc | 23       |   |   |   | 1 |   |   |   |                |        | I          |            |
| <i>Dimorphotheca ecklonis</i> DC.                                        | Asteraceae     | Syn      | NL   | Acc  | Syn  | Acc | Acc  | Syn | 1        |   | 1 |   | 1 | 1 | 1 |   |                |        | S          | O          |
| <i>Dioscorea communis</i> (L.) Caddick & Wilkin                          | Dioscoreaceae  | Acc      | Acc  | Acc  | Acc  | Acc | Acc  | Acc | 13       | 1 | 1 | 1 | 1 | 1 |   |   |                | S      |            |            |
| <i>Dipcadi serotinum</i> (L.) Medik.                                     | Liliaceae      | Acc      | Acc  | Acc  | Acc  | Acc | Acc  | Acc | 10       |   |   | 1 | 1 | 1 | 1 | 1 |                | P      |            |            |
| <i>Diplachne fusca</i> (L.) P.Beauv. ex Roem. & Schult.                  | Poaceae        | Acc      | Acc  | Acc  | Syn  | Acc | Acc  | Syn | 5        |   |   |   |   | 1 |   |   |                |        | P          |            |
| <i>Diplazium caudatum</i> (Cac.) Jermy                                   | Athyriaceae    | Acc      | Acc  | Acc  | AmUn | Acc | Acc  | Acc | 13       |   | 1 | 1 | 1 | 1 |   |   |                | S      |            |            |
| <i>Diplotaxis catholica</i> (L.) DC.                                     | Brassicaceae   | Acc      | Acc  | Acc  | Acc  | Acc | Acc  | Acc | 5        |   |   |   |   | 1 |   |   |                | P      |            |            |
| <i>Diplotaxis muralis</i> (L.) DC.                                       | Brassicaceae   | Acc      | Acc  | Acc  | Acc  | Acc | Acc  | Acc | 19       |   |   |   | 1 |   |   |   |                | P      |            |            |
| <i>Diplotaxis tenuifolia</i> (L.) DC.                                    | Brassicaceae   | Acc      | Acc  | Acc  | Acc  | Acc | Acc  | Acc | 19       |   |   |   |   | 1 |   | 1 |                |        | S          |            |
| <i>Dipsacus fullonum</i> L.                                              | Dipsacaceae    | Acc      | Acc  | Acc  | Acc  | Syn | Acc  | Acc | 18       |   | 1 |   | 1 |   |   |   |                |        | S          |            |
| <i>Disocactus speciosus</i> (Cav.) Barthlott                             | Cactaceae      | Acc      | NL   | Acc  | Acc  | Acc | Acc  | NL  | 43       |   |   |   |   | 1 |   |   |                |        | S          | O          |
| <i>Disphyma crassifolium</i> (L.) L.Bolus                                | Aizoaceae      | Acc      | Acc  | Acc  | Acc  | Acc | Acc  | Acc | 1        |   | 1 |   |   | 1 | 1 |   |                |        | S          | O          |
| <i>Distimake tuberosus</i> (L.) A.R.Simões & Staples                     | Convolvulaceae | NL       | Syn  | Acc  | Syn  | Acc | Acc  | Syn | 13       |   |   |   | 1 | 1 |   |   |                |        | S          | O          |
| <i>Dittrichia viscosa</i> (L.) Greuter                                   | Asteraceae     | Acc      | Acc  | Acc  | Acc  | Acc | Acc  | Acc | 3        | 1 | 1 | 1 | 1 | 1 | 1 | 1 |                | P      |            |            |
| <i>Draba verna</i> L.                                                    | Brassicaceae   | Syn      | NL   | Acc  | Syn  | Acc | Acc  | Acc | 104      |   |   |   | 1 |   |   |   |                |        | P          |            |
| <i>Dracaena draco</i> (L.) L.                                            | Asparagaceae   | Acc      | Acc  | Acc  | Acc  | Acc | Acc  | Acc | 9        | 1 | 1 | 1 | 1 | 1 |   |   |                | S      |            | O          |
| <i>Dracaena tamaranae</i> Marrero Rodr., R.S.Almeira & M.Gonzales-Martin | Asparagaceae   | Acc      | Acc  | Acc  | Acc  | Acc | Acc  | Acc | 0        |   |   |   |   | 1 |   |   | C              | S      |            |            |
| <i>Dracocephalum thymiflorum</i> L.                                      | Lamiaceae      | Acc      | Acc  | Acc  | Acc  | Acc | Acc  | Acc | 4        |   |   | 1 | 1 |   |   |   |                |        | S          |            |
| <i>Dracunculus canariensis</i> Kunth                                     | Araceae        | Acc      | Acc  | Acc  | Acc  | Acc | Acc  | Acc | 1        | 1 | 1 | 1 | 1 | 1 | 1 |   | A              | S      |            |            |
| <i>Drimia hesperia</i> (Webb & Berthel.) J.C.Manning & Goldblatt         | Hyacinthaceae  | Acc      | Acc  | Acc  | Acc  | Acc | Acc  | Acc | 3        |   |   |   | 1 |   |   |   | T              | S      |            |            |
| <i>Drimia maritima</i> (L.) Stearn                                       | Hyacinthaceae  | Acc      | Acc  | Acc  | Acc  | Acc | Acc  | Acc | 17       |   |   |   |   |   | 1 | 1 |                | S      |            |            |
| <i>Drimiopsis maculata</i> Lindl. & Paxton                               | Hyacinthaceae  | Acc      | Acc  | Acc  | Acc  | Acc | Acc  | Acc | 3        |   |   | 1 |   |   |   |   |                |        | P          |            |
| <i>Drosanthemum floribundum</i> (Haw.) Schwantes                         | Aizoaceae      | Acc      | Acc  | Acc  | Acc  | Acc | Acc  | Acc | 8        |   |   |   |   | 1 |   |   |                |        | I          | O          |

| Species Name                                                         | Family          | Atlantis | Muer | POWO | WFO  | COL  | GBIF | TRY | POWO Syn | H | P | G | T | C | F | L | Endemic Status | Native | Non native | Ornam Crop |
|----------------------------------------------------------------------|-----------------|----------|------|------|------|------|------|-----|----------|---|---|---|---|---|---|---|----------------|--------|------------|------------|
| <i>Drosanthemum hispidum</i> (L.) Schwantes                          | Aizoaceae       | Acc      | Acc  | Acc  | Acc  | Acc  | Acc  | Acc | 1        |   |   |   | 1 |   |   |   |                |        | I          | O          |
| <i>Drusa glandulosa</i> (Poir.) H.Wolff ex Engl.                     | Apiaceae        | Acc      | Acc  | Acc  | Acc  | Acc  | Acc  | Acc | 5        | 1 | 1 | 1 | 1 | 1 | 1 | 1 |                | S      |            |            |
| <i>Dryopteris abbreviata</i> (Lam. & DC.) Newman                     | Dryopteridaceae | Syn      | Syn  | Acc  | Acc  | Acc  | Acc  | Syn | 22       |   |   | 1 | 1 |   |   |   |                | S      |            |            |
| <i>Dryopteris aemula</i> (Aiton) Kuntze                              | Dryopteridaceae | Acc      | Acc  | Acc  | AmUn | Acc  | Acc  | Acc | 0        |   |   | 1 |   |   |   |   |                | S      |            |            |
| <i>Dryopteris guanchica</i> Gibby & Jermy                            | Dryopteridaceae | Acc      | Acc  | Acc  | AmUn | Acc  | Acc  | Acc | 0        | 1 |   | 1 | 1 |   |   |   |                | S      |            |            |
| <i>Dryopteris oligodonta</i> Pic.Serm.                               | Dryopteridaceae | Acc      | Acc  | Acc  | AmUn | Acc  | Acc  | Acc | 11       | 1 | 1 | 1 | 1 | 1 |   |   | A              | S      |            |            |
| <i>Duranta erecta</i> L.                                             | Verbenaceae     | NL       | NL   | Acc  | Acc  | Acc  | Acc  | Acc | 46       |   |   |   |   | 1 | 1 |   |                |        | S          | O          |
| <i>Dysphania ambrosioides</i> (L.) Mosyakin & Clemants               | Chenopodiaceae  | Acc      | Acc  | Acc  | Acc  | Acc  | Acc  | Acc | 53       | 1 | 1 | 1 | 1 | 1 | 1 | 1 |                |        | S          |            |
| <i>Dysphania anthelmintica</i> (L.) Mosyakin & Clemants              | Chenopodiaceae  | Acc      | Acc  | Acc  | Syn  | Acc  | Acc  | Syn | 10       |   | 1 | 1 |   | 1 |   |   |                |        | S          |            |
| <i>Dysphania multifida</i> L.) Mosyakin & Clemants                   | Chenopodiaceae  | Acc      | Acc  | Acc  | Acc  | Acc  | Acc  | Acc | 17       |   |   | 1 | 1 | 1 |   | 1 |                |        | S          |            |
| <i>Ecballium elaterium</i> (L.) A.Rich.                              | Cucurbitaceae   | Acc      | NL   | Acc  | Acc  | Acc  | Acc  | Acc | 14       |   |   |   | 1 |   |   |   |                |        | I          |            |
| <i>Echinocereus rigidissimus</i> (Engelm.) Hirscht                   | Cacctaceae      | NL       | NL   | Acc  | Acc  | Acc  | Acc  | Acc | 3        |   |   |   | 1 |   |   |   |                |        | S          | O          |
| <i>Echinochloa colonum</i> (L.) Link                                 | Poaceae         | Acc      | Acc  | Acc  | Syn  | NL   | Acc  | Acc | 45       |   | 1 | 1 |   | 1 |   |   |                |        | P          |            |
| <i>Echinochloa crus-galli</i> (L.) P.Beauv.                          | Poaceae         | Acc      | Acc  | Acc  | Acc  | Acc  | Acc  | Acc | 85       |   | 1 | 1 | 1 | 1 | 1 | 1 |                |        | P          |            |
| <i>Echinopsis huascha</i> (Web.) Friedrich & G.D.Rowley              | Cactaceae       | Syn      | NL   | Acc  | Acc  | Acc  | Acc  | Acc | 44       |   |   |   | 1 |   |   |   |                |        | S          | O          |
| <i>Echinopsis lageniformis</i> (C.F.Först.) H.Friedrich & G.D.Rowley | Cactaceae       | NL       | NL   | Acc  | Syn  | Acc  | Acc  | Acc | 12       |   |   |   | 1 |   |   |   |                |        | S          | O          |
| <i>Echinopsis spachiana</i> (Lem.) Riccob.                           | Cactaceae       | NL       | NL   | Acc  | Acc  | Syn  | Acc  | Acc | 6        |   |   |   |   | 1 |   |   |                |        | S          | O          |
| <i>Echinopsis volliana</i> H.Friedrich & G.D.Rowley                  | Cactaceae       | NL       | NL   | Acc  | Acc  | Acc  | Acc  | Acc | 12       |   |   |   | 1 |   |   |   |                |        | S          | O          |
| <i>Echium acanthocarpum</i> Svent.                                   | Boraginaceae    | Acc      | Acc  | Acc  | NL   | Acc  | Acc  | Acc | 0        |   |   | 1 |   |   |   |   | G              | S      |            |            |
| <i>Echium aculeatum</i> Poir.                                        | Boraginaceae    | Acc      | Acc  | Acc  | Acc  | Acc  | Acc  | Acc | 0        | 1 |   | 1 | 1 |   |   |   | A              | S      |            |            |
| <i>Echium auberianum</i> Webb & Berthel.                             | Boraginaceae    | Acc      | Acc  | Acc  | Acc  | Acc  | Acc  | Acc | 1        |   |   |   | 1 |   |   |   | T              | S      |            |            |
| <i>Echium bethencourtii</i> A. Santos                                | Boraginaceae    | Acc      | Acc  | Acc  | Acc  | AmUn | Acc  | NL  | 0        |   | 1 |   |   |   |   |   | P              | S      |            |            |
| <i>Echium bonnetii</i> Coincy                                        | Boraginaceae    | Acc      | Acc  | Acc  | Acc  | Acc  | Acc  | Acc | 3        |   |   |   | 1 | 1 | 1 | 1 | A              | S      |            |            |
| <i>Echium brevirame</i> Sprague & Hutch.                             | Boraginaceae    | Acc      | Acc  | Acc  | Acc  | Acc  | Acc  | Acc | 0        |   | 1 |   |   |   |   |   | P              | S      |            |            |

| Species Name                                       | Family       | Atlantis | Muer | POWO | WFO  | COL | GBIF | TRY | POWO Syn | H | P | G | T | C | F | L | Endemic Status | Native | Non native | Ornam Crop |
|----------------------------------------------------|--------------|----------|------|------|------|-----|------|-----|----------|---|---|---|---|---|---|---|----------------|--------|------------|------------|
| <i>Echium callithyrsum</i> Webb ex Bolle           | Boraginaceae | Acc      | Acc  | Acc  | Acc  | Acc | Acc  | Acc | 0        |   |   |   |   | 1 |   |   | C              | S      |            |            |
| <i>Echium decaisnei</i> Webb & Berthel.            | Boraginaceae | Acc      | Acc  | Acc  | Acc  | Acc | Acc  | Acc | 0        |   |   |   |   | 1 | 1 | 1 | A              | S      |            |            |
| <i>Echium giganteum</i> L.f.                       | Boraginaceae | Acc      | Acc  | Acc  | Acc  | Acc | Acc  | Acc | 3        |   |   |   | 1 |   |   |   | T              | S      |            |            |
| <i>Echium handiense</i> Svent                      | Boraginaceae | Acc      | Acc  | Acc  | Acc  | Acc | Acc  | NL  | 0        |   |   |   |   |   | 1 |   | F              | S      |            |            |
| <i>Echium hierrense</i> Webb ex Bolle              | Boraginaceae | Acc      | Acc  | Acc  | Acc  | Acc | Acc  | Acc | 0        | 1 |   |   |   |   |   |   | H              | S      |            |            |
| <i>Echium horridum</i> Batt.                       | Boraginaceae | Acc      | Acc  | Acc  | Acc  | Acc | Acc  | Acc | 3        |   |   |   |   | 1 |   |   |                | S      |            |            |
| <i>Echium leucophaeum</i> Webb ex Sprague & Hutch. | Boraginaceae | Acc      | Acc  | Acc  | Acc  | Acc | Acc  | Acc | 0        |   |   |   | 1 |   |   |   | T              | S      |            |            |
| <i>Echium onosmifolium</i> Webb & Berthel.         | Boraginaceae | Acc      | NL   | Acc  | Acc  | Acc | Acc  | Acc | 0        |   |   |   |   | 1 |   |   | C              | S      |            |            |
| <i>Echium perezii</i> Sprague                      | Boraginaceae | Acc      | Syn  | Syn  | AmUn | Acc | Syn  | NL  | 2        |   | 1 |   |   |   |   |   | P              | S      |            |            |
| <i>Echium pininana</i> Webb & Berthel.             | Boraginaceae | Acc      | Acc  | Acc  | Acc  | Acc | Acc  | Acc | 0        |   | 1 |   |   |   |   |   | P              | S      |            |            |
| <i>Echium pitardii</i> A. Chev.                    | Boraginaceae | Syn      | Syn  | Acc  | Acc  | Syn | Syn  | NL  | 2        |   |   |   |   |   |   | 1 | L              | S      |            |            |
| <i>Echium plantagineum</i> L.                      | Boraginaceae | Acc      | Acc  | Acc  | Acc  | Acc | Acc  | Acc | 15       | 1 | 1 | 1 | 1 | 1 |   |   |                | P      |            |            |
| <i>Echium simplex</i> DC.                          | Boraginaceae | Acc      | Acc  | Acc  | Acc  | Acc | Acc  | Acc | 0        |   |   |   | 1 |   |   |   | T              | S      |            | O          |
| <i>Echium strictum</i> L.f.                        | Boraginaceae | Acc      | Acc  | Acc  | Acc  | Acc | Acc  | Acc | 7        | 1 | 1 | 1 | 1 | 1 |   |   | A              | S      |            |            |
| <i>Echium sventenii</i> Bramwell                   | Boraginaceae | Acc      | Acc  | Acc  | Acc  | Acc | Acc  | NL  | 0        |   |   |   | 1 |   |   |   | T              | S      |            |            |
| <i>Echium thyrsoflorum</i> Masson ex Link          | Boraginaceae | Syn      | Syn  | Acc  | Acc  | Syn | Syn  | NL  | 2        |   | 1 |   |   |   |   |   | P              | S      |            |            |
| <i>Echium triste</i> Svent.                        | Boraginaceae | Acc      | Acc  | Acc  | Acc  | Acc | Acc  | Acc | 0        |   |   | 1 | 1 | 1 |   |   | A              | S      |            |            |
| <i>Echium virescens</i> DC.                        | Boraginaceae | Acc      | Acc  | Acc  | Acc  | Acc | Acc  | Acc | 1        |   |   |   | 1 |   |   |   | T              | S      |            |            |
| <i>Echium webbii</i> Coincy                        | Boraginaceae | Acc      | Acc  | Acc  | Acc  | Acc | Acc  | Acc | 1        |   | 1 |   |   |   |   |   | P              | S      |            |            |
| <i>Echium wildpretii</i> H.Pearson ex Hook.f.      | Boraginaceae | Acc      | Acc  | Acc  | Acc  | Acc | Acc  | Acc | 0        |   |   |   | 1 |   |   |   | T              | S      |            |            |
| <i>Eclipta prostrata</i> (L.) L.                   | Asteraceae   | Acc      | Acc  | Acc  | Acc  | Acc | NL   | Acc | 107      |   |   |   |   | 1 |   |   |                |        | S          |            |
| <i>Ehrharta longifolia</i> Sm.                     | Asteraceae   | Acc      | Acc  | Acc  | Acc  | Acc | Acc  | Acc | 2        |   |   |   |   | 1 |   |   |                |        | S          |            |
| <i>Eleocharis multicaulis</i> (Sm.) Desv.          | Cyperaceae   | Acc      | Acc  | Acc  | Acc  | Acc | Acc  | Acc | 7        |   |   |   | 1 |   |   |   | P              |        |            |            |
| <i>Eleocharis palustris</i> (L.) Roem. & Schult.   | Cyperaceae   | Acc      | Acc  | Acc  | Acc  | Acc | Acc  | Acc | 8        |   |   | 1 | 1 | 1 |   |   | P              |        |            |            |



| Species Name                                                   | Family           | Atlantis | Muer | POWO | WFO | COL | GBIF | TRY | POWO Syn | H | P | G | T | C | F | L | Endemic Status | Native | Non native | Ornam Crop |
|----------------------------------------------------------------|------------------|----------|------|------|-----|-----|------|-----|----------|---|---|---|---|---|---|---|----------------|--------|------------|------------|
| <i>Eleusine africana</i> Kenn.-O'Byrne                         | Poaceae          | Syn      | NL   | Acc  | Acc | Acc | Acc  | Acc | 2        |   | 1 |   |   |   |   |   |                |        | I          |            |
| <i>Eleusine indica</i> (L.) Gaertn.                            | Poaceae          | Acc      | Acc  | Acc  | Acc | Acc | Acc  | Acc | 28       |   | 1 | 1 | 1 | 1 | 1 |   |                |        | I          |            |
| <i>Eleusine tristachya</i> (Lam.) Lam.                         | Poaceae          | Acc      | Acc  | Acc  | Acc | Acc | Acc  | Acc | 9        |   | 1 |   |   |   |   |   |                |        | S          |            |
| <i>Elionurus royleanus</i> Nees ex A.Rich.                     | Poaceae          | Acc      | Acc  | Acc  | Acc | Acc | Acc  | Acc | 5        |   |   |   |   | 1 |   |   |                |        | S          |            |
| <i>Elodea canadensis</i> Michx.                                | Hydrocharitaceae | Acc      | Acc  | Acc  | Acc | Acc | Acc  | Acc | 30       |   | 1 |   | 1 |   |   |   |                |        | I          |            |
| <i>Elymus repens</i> (L.) Gould                                | Poaceae          | Acc      | Acc  | Acc  | Acc | Acc | Acc  | Acc | 7        |   |   |   | 1 | 1 |   |   |                | P      |            |            |
| <i>Enneapogon desvauxii</i> P.Beauv.                           | Poaceae          | Acc      | Acc  | Acc  | Acc | Acc | Acc  | Acc | 20       |   |   |   | 1 | 1 | 1 | 1 |                | P      |            |            |
| <i>Ensete ventricosum</i> (Welw.) Cheesman                     | Musaceae         | NL       | NL   | Acc  | Acc | Acc | Acc  | Acc | 32       |   | 1 |   | 1 |   |   |   |                |        | S          | O          |
| <i>Ephedra altissima</i> Desf.                                 | Ephedraceae      | Acc      | Acc  | Acc  | Acc | Acc | Acc  | Acc | 1        |   |   |   | 1 | 1 |   |   |                | S      |            |            |
| <i>Ephedra fragilis</i> Desf.                                  | Ephedraceae      | Acc      | Acc  | Acc  | Acc | Acc | Acc  | Acc | 0        | 1 | 1 | 1 | 1 | 1 |   | 1 |                | S      |            |            |
| <i>Ephedra major</i> Host                                      | Ephedraceae      | Acc      | Acc  | Acc  | Acc | Acc | Acc  | Acc | 9        |   | 1 |   | 1 |   |   |   |                | S      |            |            |
| <i>Epilobium angustifolium</i> L.                              | Onagraceae       | Acc      | Syn  | Acc  | Acc | Acc | Acc  | Acc | 40       |   |   |   | 1 |   |   |   |                |        | P          |            |
| <i>Epilobium ciliatum</i> Lehm.                                | Onagraceae       | NL       | NL   | Acc  | Acc | Acc | Acc  | Acc | 61       |   | 1 | 1 |   |   |   |   |                | P      |            |            |
| <i>Epilobium glandulosum</i> Lehm.                             | Onagraceae       | Acc      | Acc  | Acc  | Syn | Syn | Syn  | Syn | 24       |   |   |   |   | 1 |   |   |                |        | S          |            |
| <i>Epilobium hirsutum</i> L.                                   | Onagraceae       | Acc      | Acc  | Acc  | Acc | Acc | Acc  | Acc | 19       |   | 1 | 1 | 1 |   |   |   |                | P      |            |            |
| <i>Epilobium obscurum</i> Schreb.                              | Onagraceae       | Acc      | Acc  | Acc  | Acc | Acc | Acc  | Acc | 18       |   |   |   | 1 |   |   |   |                | P      |            |            |
| <i>Epilobium palustre</i> L.                                   | Onagraceae       | Acc      | Acc  | Acc  | Acc | Acc | Acc  | Acc | 53       |   |   |   | 1 |   |   |   |                | P      |            |            |
| <i>Epilobium parviflorum</i> Schreb.                           | Onagraceae       | Acc      | Acc  | Acc  | Acc | Acc | Acc  | Acc | 17       |   | 1 | 1 | 1 | 1 |   |   |                | P      |            |            |
| <i>Epilobium tetragonum</i> L.                                 | Onagraceae       | Acc      | Acc  | Acc  | Acc | Acc | Acc  | Acc | 15       |   | 1 | 1 | 1 | 1 |   |   |                | P      |            |            |
| <i>Equisetum ramosissimum</i> Desf.                            | Equisetaceae     | Acc      | Acc  | Acc  | Acc | Acc | Acc  | Acc | 1        |   | 1 | 1 | 1 | 1 |   |   |                | P      |            |            |
| <i>Eragrostis barrelieri</i> Daveau                            | Poaceae          | Acc      | Acc  | Acc  | Acc | Acc | Acc  | Acc | 7        | 1 | 1 | 1 | 1 | 1 | 1 | 1 |                | P      |            |            |
| <i>Eragrostis papposa</i> (Roem. & Schult.) Steud.             | Poaceae          | Acc      | NL   | Acc  | Acc | Acc | Acc  | Acc | 7        |   |   |   |   | 1 |   |   |                | P      |            |            |
| <i>Eragrostis virescens</i> J. Presl                           | Poaceae          | Acc      | Acc  | Acc  | Acc | Acc | Acc  | Acc | 11       |   | 1 |   | 1 | 1 |   |   |                | P      |            |            |
| <i>Erica canariensis</i> Rivas Mart., Martin Osorio & Wildpret | Ericaceae        | Acc      | Syn  | Acc  | NL  | Acc | NL   | Syn | 0        | 1 | 1 | 1 | 1 | 1 | 1 | 1 |                | S      |            |            |

| Species Name                                 | Family       | Atlantis | Muer | POWO | WFO | COL | GBIF | TRY | POWO Syn | H | P | G | T | C | F | L | Endemic Status | Native | Non native | Ornam Crop |
|----------------------------------------------|--------------|----------|------|------|-----|-----|------|-----|----------|---|---|---|---|---|---|---|----------------|--------|------------|------------|
| <i>Erica platycodon</i> L.                   | Ericaceae    | Acc      | Acc  | Acc  | Syn | Acc | Acc  | Syn | 1        | 1 |   | 1 | 1 |   |   |   | A              | S      |            |            |
| <i>Erigeron bonariensis</i> L.               | Asteraceae   | Acc      | Acc  | Acc  | Acc | Acc | Acc  | Acc | 29       | 1 | 1 | 1 | 1 | 1 | 1 | 1 |                |        | S          |            |
| <i>Erigeron calderae</i> A.Hansen            | Asteraceae   | Acc      | Acc  | Acc  | Acc | Acc | Acc  | Acc | 2        |   |   |   | 1 |   |   |   | T              | S      |            |            |
| <i>Erigeron canadensis</i> L.                | Asteraceae   | Acc      | Acc  | Acc  | Acc | Acc | Acc  | Acc | 31       |   |   |   | 1 | 1 |   |   |                |        | S          |            |
| <i>Erigeron floribundus</i> (Kunth) Sch.Bip. | Asteraceae   | NL       | Acc  | Acc  | Acc | Acc | Acc  | Acc | 14       | 1 | 1 | 1 | 1 | 1 |   |   |                |        | S          |            |
| <i>Erigeron gouanii</i> L.                   | Asteraceae   | Acc      | Acc  | Acc  | Acc | Syn | Acc  | Acc | 15       |   | 1 | 1 | 1 | 1 |   |   |                |        | S          |            |
| <i>Erigeron karvinskianus</i> DC.            | Asteraceae   | Acc      | Acc  | Acc  | Acc | Acc | Acc  | Acc | 3        | 1 | 1 |   | 1 | 1 |   | 1 |                |        | I          | O          |
| <i>Erigeron sumatrensis</i> Retz.            | Asteraceae   | Acc      | Acc  | Acc  | Acc | Acc | Acc  | Acc | 21       |   |   | 1 | 1 | 1 | 1 | 1 |                |        | S          |            |
| <i>Eriobotrya japonica</i> (Thunb.) Lindl.   | Rosaceae     | Acc      | Acc  | Acc  | Acc | Acc | Acc  | Acc | 3        |   | 1 | 1 | 1 | 1 |   | 1 |                |        | S          | C          |
| <i>Erodium botrys</i> (Cav.) Bertol.         | Geraniaceae  | Acc      | Acc  | Acc  | Acc | Acc | Acc  | Acc | 4        | 1 | 1 | 1 | 1 | 1 | 1 | 1 |                | P      |            |            |
| <i>Erodium brachycarpum</i> (Godr.) Thell.   | Geraniaceae  | Acc      | NL   | Acc  | Acc | Acc | Acc  | Acc | 3        | 1 |   |   | 1 |   |   |   |                | P      |            |            |
| <i>Erodium chium</i> (Burm.f.) Willd.        | Geraniaceae  | Acc      | Acc  | Acc  | Acc | Acc | Acc  | Acc | 10       | 1 | 1 | 1 | 1 | 1 | 1 | 1 |                | P      |            |            |
| <i>Erodium ciconium</i> (L.) L'Hér.          | Geraniaceae  | Acc      | Acc  | Acc  | Acc | Acc | Acc  | Acc | 9        |   |   |   | 1 | 1 |   |   |                | P      |            |            |
| <i>Erodium cicutarium</i> (L.) L'Hér.        | Geraniaceae  | Acc      | Acc  | Acc  | Acc | Acc | Acc  | Acc | 41       | 1 | 1 | 1 | 1 | 1 | 1 | 1 |                | P      |            |            |
| <i>Erodium laciniatum</i> (Cav.) Willd.      | Geraniaceae  | Acc      | Acc  | Acc  | Acc | Acc | Acc  | Acc | 19       | 1 |   | 1 | 1 | 1 | 1 | 1 |                | P      |            |            |
| <i>Erodium malacoides</i> (L.) L'Hér.        | Geraniaceae  | Acc      | Acc  | Acc  | Acc | Acc | Acc  | Acc | 3        | 1 | 1 | 1 | 1 | 1 | 1 | 1 |                | P      |            |            |
| <i>Erodium maritimum</i> L'Hér.              | Geraniaceae  | Acc      | Acc  | Acc  | Acc | Acc | Acc  | Acc | 4        |   |   |   | 1 | 1 |   |   |                | P      |            |            |
| <i>Erodium moschatum</i> (L.) L'Hér.         | Geraniaceae  | Acc      | Acc  | Acc  | Acc | Acc | Acc  | Acc | 6        | 1 | 1 | 1 | 1 | 1 | 1 | 1 |                | P      |            |            |
| <i>Erodium neuradifolium</i> Delile ex Godr. | Geraniaceae  | Acc      | Acc  | Acc  | Acc | Acc | Acc  | Acc | 8        |   |   | 1 | 1 | 1 | 1 | 1 |                | P      |            |            |
| <i>Erodium pulverulentum</i> (Cav.) Willd.   | Geraniaceae  | NL       | Acc  | Acc  | Syn | Syn | Syn  | Syn | 8        |   |   |   |   |   | 1 | 1 |                | P      |            |            |
| <i>Erodium salzmännii</i> Delile             | Geraniaceae  | NL       | Acc  | Acc  | Acc | Acc | Acc  | Acc | 6        |   |   |   | 1 |   | 1 | 1 |                | P      |            |            |
| <i>Erodium touchyanum</i> Delile ex Godr.    | Geraniaceae  | Acc      | Acc  | Acc  | Acc | Acc | Acc  | Acc | 1        |   |   |   |   |   | 1 | 1 |                | P      |            |            |
| <i>Eruca vesicaria</i> (L.) Cav.             | Brassicaceae | Acc      | Syn  | Acc  | Acc | Acc | Acc  | Acc | 43       | 1 | 1 | 1 | 1 | 1 | 1 | 1 |                | P      |            |            |
| <i>Erucastrum canariense</i> Web & Berthel.  | Brassicaceae | Acc      | Acc  | Acc  | Acc | Acc | Acc  | Acc | 0        |   | 1 | 1 | 1 | 1 | 1 | 1 | A              | S      |            |            |

| Species Name                                                | Family       | Atlantis | Muer | POWO | WFO | COL  | GBIF | TRY | POWO Syn | H | P | G | T | C | F | L | Endemic Status | Native | Non native | Ornam Crop |
|-------------------------------------------------------------|--------------|----------|------|------|-----|------|------|-----|----------|---|---|---|---|---|---|---|----------------|--------|------------|------------|
| <i>Erucastrum cardaminoides</i> (Webb ex Christ) O.E.Schulz | Brassicaceae | Acc      | Acc  | Acc  | Acc | Acc  | Acc  | Acc | 0        | 1 | 1 | 1 | 1 | 1 | 1 | 1 |                | S      |            |            |
| <i>Erysimum albescens</i> (Webb & Berthel.) Bramwell        | Brassicaceae | NL       | Acc  | Syn  | Acc | AmUn | Acc  | Syn |          |   |   |   |   | 1 |   |   | C              | S      |            |            |
| <i>Erysimum bicolor</i> (Hornem.) DC.                       | Brassicaceae | NL       | Acc  | Acc  | Acc | Acc  | Acc  | Acc | 12       | 1 | 1 | 1 | 1 | 1 | 1 |   | A              | S      |            |            |
| <i>Erysimum scoparium</i> (Brouss. ex Willd.) Wettst.       | Brassicaceae | Acc      | Acc  | Acc  | Acc | Acc  | Acc  | Acc | 12       |   | 1 |   | 1 |   |   |   | A              | S      |            | O          |
| <i>Erysimum virescens</i> (Webb ex Christ) Wettst.          | Brassicaceae | Acc      | NL   | Acc  | Syn | Syn  | Syn  | Syn | 1        | 1 | 1 | 1 | 1 | 1 | 1 |   | A              | S      |            |            |
| <i>Erythrina crista-galli</i> L.                            | Fabaceae     | NL       | NL   | Acc  | Acc | Acc  | Acc  | Acc | 12       |   | 1 |   | 1 |   |   |   |                |        | S          | O          |
| <i>Erythrostemon gilliesii</i> (Hook.) Klotzsch             | Fabaceae     | Syn      | Syn  | Acc  | Syn | Syn  | Syn  | Acc | 4        |   |   | 1 | 1 | 1 | 1 | 1 |                |        | S          | O          |
| <i>Eschscholzia californica</i> Cham.                       | Papaveraceae | Acc      | Acc  | Acc  | Acc | Acc  | Acc  | Acc | 108      | 1 | 1 |   | 1 | 1 |   | 1 |                |        | I          | O          |
| <i>Espostoa melanostele</i> (Vaupel) Borg                   | Cactaceae    | Acc      | NL   | Acc  | Acc | Acc  | Acc  | Acc | 9        |   |   |   | 1 |   |   |   |                |        | S          | O          |
| <i>Eucalyptus blakelyi</i> Maiden                           | Myrtaceae    | Acc      | NL   | Acc  | Acc | Acc  | Acc  | Acc | 2        |   |   |   |   | 1 |   |   |                |        | S          | O          |
| <i>Eucalyptus camaldulensis</i> Dehnh.                      | Myrtaceae    | Acc      | Acc  | Acc  | Acc | Acc  | Acc  | Acc | 0        | 1 | 1 | 1 | 1 | 1 | 1 |   |                |        | I          | O          |
| <i>Eucalyptus cladocalyx</i> F.Muell.                       | Myrtaceae    | Acc      | NL   | Acc  | Acc | Acc  | Acc  | Acc | 2        |   |   |   | 1 |   |   |   |                |        | S          | O          |
| <i>Eucalyptus conferruminata</i> D.J. Carr & S.G.M.Carr     | Myrtaceae    | Acc      | NL   | Acc  | Acc | Acc  | Acc  | Acc | 0        |   |   |   |   | 1 |   |   |                |        | S          | O          |
| <i>Eucalyptus cornuta</i> Labill.                           | Myrtaceae    | Acc      | NL   | Acc  | Acc | Acc  | Acc  | Acc | 1        |   |   |   |   | 1 |   |   |                |        | S          | O          |
| <i>Eucalyptus diversicolor</i> F.Muell.                     | Myrtaceae    | Acc      | NL   | Acc  | Acc | Acc  | Acc  | Acc | 1        |   |   |   | 1 | 1 |   |   |                |        | S          | O          |
| <i>Eucalyptus dwyeri</i> Maiden & Blakely                   | Myrtaceae    | Acc      | NL   | Acc  | Acc | Acc  | Acc  | Acc | 0        |   |   |   |   | 1 |   |   |                |        | S          | O          |
| <i>Eucalyptus globulus</i> Labill.                          | Myrtaceae    | Acc      | Acc  | Acc  | Acc | Acc  | Acc  | Acc | 0        | 1 | 1 | 1 | 1 | 1 |   | 1 |                |        | I          | O          |
| <i>Eucalyptus gomphocephala</i> A.Cunn. ex DC.              | Myrtaceae    | Acc      | Acc  | Acc  | Acc | Acc  | Acc  | Acc | 1        |   |   |   |   | 1 |   |   |                |        | S          | O          |
| <i>Eucalyptus lehmannii</i> (Schauer) Benth.                | Myrtaceae    | Acc      | NL   | Acc  | Acc | Acc  | Acc  | Acc | 1        |   |   |   |   | 1 |   |   |                |        | S          | O          |
| <i>Eucalyptus moluccana</i> Roxb.                           | Myrtaceae    | Acc      | NL   | Acc  | Acc | Acc  | Acc  | Acc | 2        |   |   |   |   | 1 |   |   |                |        | S          | O          |
| <i>Eucalyptus ovata</i> Labill.                             | Myrtaceae    | Acc      | NL   | Acc  | Acc | Acc  | Acc  | Acc | 1        |   |   |   |   | 1 |   |   |                |        | S          | O          |
| <i>Eucalyptus robusta</i> Sm.                               | Myrtaceae    | Acc      | NL   | Acc  | Acc | Acc  | Acc  | Acc | 4        |   |   |   | 1 | 1 |   |   |                |        | S          | O          |
| <i>Eucalyptus rudis</i> Endl.                               | Myrtaceae    | NL       | Acc  | Acc  | Acc | Acc  | Acc  | Acc | 0        |   |   |   |   | 1 |   |   |                |        | S          | O          |
| <i>Eucalyptus sideroxylon</i> A.Cunn. ex Wools              | Myrtaceae    | Acc      | NL   | Acc  | Acc | Acc  | Acc  | Acc | 3        |   |   |   |   | 1 |   |   |                |        | S          | O          |

| Species Name                                         | Family          | Atlantis | Muer | POWO | WFO | COL | GBIF | TRY | POWO Syn | H | P | G | T | C | F | L | Endemic Status | Native | Non native | Ornam Crop |
|------------------------------------------------------|-----------------|----------|------|------|-----|-----|------|-----|----------|---|---|---|---|---|---|---|----------------|--------|------------|------------|
| <i>Eucalyptus talyuberlup</i> D.J.Carr & S..G.M.Carr | Myrtaceae       | Acc      | NL   | Acc  | Acc | Acc | Acc  | Acc | 0        |   |   |   |   | 1 |   |   |                |        | S          | O          |
| <i>Eucalyptus viminalis</i> Labill.                  | Myrtaceae       | Acc      | Acc  | Acc  | Acc | Acc | Acc  | Acc | 0        |   |   |   |   | 1 |   |   |                |        | S          | O          |
| <i>Eudianthe coeli-rosa</i> (L.) Fenzl ex Endl.      | Caryophyllaceae | Syn      | Syn  | Acc  | Syn | Acc | Acc  | Syn | 19       |   |   |   | 1 |   |   |   |                | P      |            |            |
| <i>Euphorbia aphylla</i> Brouss. ex Willd.           | Euphorbiaceae   | Acc      | Acc  | Acc  | Acc | Acc | Acc  | Acc | 2        |   |   | 1 | 1 | 1 |   |   | A              | S      |            |            |
| <i>Euphorbia atropurpurea</i> Brouss. ex Willd.      | Euphorbiaceae   | Acc      | Acc  | Acc  | Acc | Acc | Acc  | Acc | 2        |   |   |   | 1 |   |   |   | T              | S      |            |            |
| <i>Euphorbia balsamifera</i> Aiton                   | Euphorbiaceae   | Acc      | Acc  | Acc  | Acc | Acc | Acc  | Acc | 1        | 1 | 1 | 1 | 1 | 1 | 1 | 1 |                | S      |            |            |
| <i>Euphorbia berthelotii</i> Bolle ex Boiss.         | Euphorbiaceae   | Acc      | Acc  | Acc  | Acc | Acc | Acc  | Acc | 1        |   |   | 1 |   |   |   |   | G              | S      |            |            |
| <i>Euphorbia bourgeana</i> J.Gay ex Boiss.           | Euphorbiaceae   | Acc      | Acc  | Acc  | Acc | Acc | Acc  | Acc | 1        |   |   | 1 | 1 |   |   |   | A              | S      |            |            |
| <i>Euphorbia bravoana</i> Svent.                     | Euphorbiaceae   | Acc      | Acc  | Acc  | Acc | Acc | Acc  | Acc | 0        |   |   | 1 |   |   |   |   | G              | S      |            |            |
| <i>Euphorbia calyptrata</i> Coss. & Kralik           | Euphorbiaceae   | Acc      | Acc  | Acc  | Acc | Acc | Acc  | Acc | 1        |   |   |   |   | 1 |   |   |                |        | P          |            |
| <i>Euphorbia canariensis</i> L.                      | Euphorbiaceae   | Acc      | Acc  | Acc  | Acc | Acc | Acc  | Acc | 4        | 1 | 1 | 1 | 1 | 1 | 1 |   | A              | S      |            |            |
| <i>Euphorbia chamaesyce</i> L.                       | Euphorbiaceae   | Acc      | Acc  | Acc  | Acc | Acc | Acc  | Acc | 21       |   |   | 1 | 1 | 1 | 1 |   |                | P      |            |            |
| <i>Euphorbia exigua</i> L.                           | Euphorbiaceae   | Acc      | Acc  | Acc  | Acc | Acc | Acc  | Acc | 2        |   | 1 |   | 1 | 1 | 1 | 1 |                |        | P          |            |
| <i>Euphorbia granulata</i> Forssk.                   | Euphorbiaceae   | Acc      | Acc  | Acc  | Acc | Acc | Acc  | Acc | 15       |   |   | 1 |   | 1 |   |   |                |        | P          |            |
| <i>Euphorbia handiensis</i> Burchard                 | Euphorbiaceae   | Acc      | Acc  | Acc  | Acc | Acc | Acc  | Acc | 0        |   |   |   |   |   | 1 |   | F              | S      |            |            |
| <i>Euphorbia helioscopia</i> L.                      | Euphorbiaceae   | Acc      | Acc  | Acc  | Acc | Acc | Acc  | Acc | 3        |   | 1 | 1 | 1 | 1 | 1 |   |                | P      |            |            |
| <i>Euphorbia heterophylla</i> L.                     | Euphorbiaceae   | Acc      | Acc  | Acc  | Acc | Acc | Acc  | Acc | 4        |   |   |   | 1 | 1 |   |   |                |        | P          | O          |
| <i>Euphorbia hirsuta</i> L.                          | Euphorbiaceae   | Acc      | Acc  | Acc  | Acc | Acc | Acc  | Acc | 22       |   |   |   | 1 | 1 | 1 |   |                |        | S          |            |
| <i>Euphorbia humifusa</i> Willd.                     | Euphorbiaceae   | Acc      | Acc  | Acc  | Acc | Acc | Acc  | Acc | 10       |   |   |   | 1 |   |   |   |                |        | P          |            |
| <i>Euphorbia hypericifolia</i> L.                    | Euphorbiaceae   | Acc      | Acc  | Acc  | Acc | Acc | Acc  | Acc | 8        |   | 1 |   | 1 | 1 |   |   |                |        | P          | O          |
| <i>Euphorbia inaequilatera</i> Sond.                 | Euphorbiaceae   | Acc      | Acc  | Acc  | Acc | Acc | Acc  | Acc | 13       |   |   |   | 1 |   |   |   |                |        | P          |            |
| <i>Euphorbia lamarckii</i> Sweet                     | Euphorbiaceae   | Acc      | Acc  | Acc  | Acc | Acc | Acc  | Acc | 8        | 1 | 1 | 1 | 1 |   |   |   | A              | S      |            |            |
| <i>Euphorbia lathyris</i> L.                         | Euphorbiaceae   | Acc      | Acc  | Acc  | Acc | Acc | Acc  | Acc | 10       |   | 1 |   | 1 |   |   |   |                | P      |            |            |
| <i>Euphorbia leucocephala</i> Lotsy                  | Euphorbiaceae   | NL       | NL   | Acc  | Acc | Acc | Acc  | Acc | 0        |   | 1 |   |   |   |   |   |                |        | S          | O          |

| Species Name                                    | Family        | Atlantis | Muer | POWO | WFO | COL | GBIF | TRY | POWO Syn | H | P | G | T | C | F | L | Endemic Status | Native | Non native | Ornam Crop |
|-------------------------------------------------|---------------|----------|------|------|-----|-----|------|-----|----------|---|---|---|---|---|---|---|----------------|--------|------------|------------|
| <i>Euphorbia maculata</i> L.                    | Euphorbiaceae | Acc      | Acc  | Acc  | Acc | Acc | Acc  | Acc | 17       |   | 1 |   | 1 | 1 |   |   |                |        | S          | O          |
| <i>Euphorbia mellifera</i> Aiton                | Euphorbiaceae | Acc      | Acc  | Acc  | Acc | Acc | Acc  | Acc | 4        |   | 1 | 1 | 1 |   |   |   | A              | S      |            |            |
| <i>Euphorbia milii</i> Des Moul.                | Euphorbiaceae | Acc      | Acc  | Acc  | Acc | Acc | Acc  | Acc | 2        |   |   |   | 1 | 1 |   |   |                |        | S          | O          |
| <i>Euphorbia muriellii</i> N.E.Br.              | Euphorbiaceae | NL       | NL   | Acc  | NL  | Syn | Syn  | Syn | 2        |   | 1 |   | 1 | 1 |   | 1 |                |        | S          | O          |
| <i>Euphorbia nutans</i> Lag.                    | Euphorbiaceae | Acc      | Acc  | Acc  | Acc | Acc | Acc  | Acc | 15       |   |   |   | 1 | 1 |   |   |                |        | P          |            |
| <i>Euphorbia paralias</i> L.                    | Euphorbiaceae | Acc      | Acc  | Acc  | Acc | Acc | Acc  | Acc | 6        |   |   | 1 | 1 | 1 | 1 | 1 |                | S      |            |            |
| <i>Euphorbia peplis</i> L.                      | Euphorbiaceae | Acc      | Acc  | Acc  | Acc | Acc | Acc  | NL  | 7        |   | 1 |   | 1 | 1 | 1 | 1 |                | P      |            |            |
| <i>Euphorbia peplus</i> L.                      | Euphorbiaceae | Acc      | Acc  | Acc  | Acc | Acc | Acc  | Acc | 4        | 1 | 1 | 1 | 1 | 1 | 1 | 1 |                | P      |            |            |
| <i>Euphorbia platyphyllos</i> L.                | Euphorbiaceae | Acc      | Acc  | Acc  | Acc | Acc | Acc  | Acc | 2        |   |   |   | 1 | 1 |   |   |                | P      |            |            |
| <i>Euphorbia prostrata</i> Aiton                | Euphorbiaceae | Acc      | Acc  | Acc  | Acc | Acc | Acc  | Acc | 14       | 1 | 1 | 1 | 1 | 1 | 1 | 1 |                |        | S          |            |
| <i>Euphorbia pterococca</i> Brot.               | Euphorbiaceae | Acc      | Acc  | Acc  | Acc | Acc | Acc  | Acc | 4        | 1 |   |   | 1 | 1 |   |   |                |        | P          |            |
| <i>Euphorbia pulcherrima</i> Willd. ex Klotzsch | Euphorbiaceae | NL       | Acc  | Acc  | Acc | Acc | Acc  | Acc | 11       |   | 1 | 1 | 1 | 1 | 1 | 1 |                |        | S          | O          |
| <i>Euphorbia regis-jubae</i> J.Gay              | Euphorbiaceae | Acc      | Acc  | Acc  | Acc | Acc | Acc  | Acc | 8        |   |   |   |   | 1 | 1 | 1 |                | S      |            |            |
| <i>Euphorbia scordiifolia</i> Jacq.             | Euphorbiaceae | Acc      | Acc  | Acc  | Acc | Acc | Acc  | Acc | 5        | 1 |   |   |   |   |   |   |                |        | P          |            |
| <i>Euphorbia segetalis</i> L.                   | Euphorbiaceae | Acc      | Acc  | Acc  | Acc | Acc | Acc  | Acc | 2        |   | 1 |   | 1 |   |   | 1 |                | P      |            |            |
| <i>Euphorbia serpens</i> Kunth                  | Euphorbiaceae | Acc      | Acc  | Acc  | Acc | Acc | Acc  | Acc | 28       | 1 |   | 1 | 1 | 1 | 1 | 1 |                |        | P          |            |
| <i>Euphorbia serrata</i> L.                     | Euphorbiaceae | Acc      | Acc  | Acc  | Acc | Acc | Acc  | Acc | 8        |   |   |   | 1 | 1 | 1 | 1 |                | P      |            |            |
| <i>Euphorbia sulcata</i> Lens ex Loisel.        | Euphorbiaceae | Acc      | Acc  | Acc  | Acc | Acc | Acc  | Acc | 3        |   |   |   | 1 | 1 | 1 | 1 |                | P      |            |            |
| <i>Euphorbia taurinensis</i> All.               | Euphorbiaceae | Acc      | Acc  | Acc  | Acc | Acc | Acc  | Acc | 11       |   |   |   | 1 |   | 1 | 1 |                | P      |            |            |
| <i>Euphorbia terracina</i> L.                   | Euphorbiaceae | Acc      | Acc  | Acc  | Acc | Acc | Acc  | Acc | 36       | 1 | 1 | 1 | 1 | 1 | 1 | 1 |                | P      |            |            |
| <i>Euphorbia tirucalli</i> L.                   | Euphorbiaceae | NL       | NL   | Acc  | Acc | Acc | Acc  | Acc | 10       |   | 1 | 1 | 1 | 1 | 1 | 1 |                |        | S          | O          |
| <i>Euphorbia variabilis</i> Ces.                | Euphorbiaceae | Acc      | NL   | Acc  | Acc | Acc | Acc  | Acc | 1        |   |   |   | 1 |   | 1 |   |                | P      |            |            |
| <i>Euryops chrysanthemoides</i> (DC.) B.Nord.   | Asteraceae    | Acc      | NL   | Acc  | Acc | Acc | Acc  | Acc | 1        |   |   |   | 1 |   |   |   |                |        | S          | O          |
| <i>Fagopyrum esculentum</i> Moench              | Polygonaceae  | Acc      | Acc  | Acc  | Acc | Acc | Acc  | Acc | 22       |   |   |   |   | 1 |   |   |                |        | S          | C          |

| Species Name                                   | Family       | Atlantis | Muer | POWO | WFO | COL | GBIF | TRY | POWO Syn | H | P | G | T | C | F | L | Endemic Status | Native | Non native | Ornam Crop |
|------------------------------------------------|--------------|----------|------|------|-----|-----|------|-----|----------|---|---|---|---|---|---|---|----------------|--------|------------|------------|
| <i>Fallopia convolvulus</i> (L.) Å.Löve        | Polygonaceae | Acc      | Acc  | Acc  | Acc | Acc | Acc  | Acc | 19       | 1 | 1 | 1 | 1 | 1 |   |   |                |        | S          |            |
| <i>Farugium japonicum</i> (L.) Kitam.          | Asteraceae   | Acc      | Acc  | Acc  | Acc | Acc | Acc  | Acc | 16       |   | 1 |   |   | 1 |   |   |                |        | S          | O          |
| <i>Felicia amoena</i> (Sch.Bip.) Levyns        | Asteraceae   | NL       | NL   | Acc  | Acc | Acc | Acc  | Syn | 0        |   | 1 |   |   |   |   |   |                |        | S          |            |
| <i>Ferocactus herrerae</i> J.G.Ortega          | Cactaceae    | Acc      | NL   | NL   | Acc | Syn | Acc  | Syn | 2        |   |   |   |   | 1 |   | 1 |                |        | S          | O          |
| <i>Ferraria crispa</i> Burm.                   | Iridaceae    | Acc      | Acc  | Acc  | Acc | Acc | Acc  | Acc | 8        | 1 | 1 |   |   |   |   |   |                |        | S          | O          |
| <i>Ferula arnoldiana</i> S.Scholz & Reyes-Bet. | Apiaceae     | Acc      | Acc  | Acc  | NL  | Acc | Acc  | NL  | 0        |   |   |   |   |   | 1 |   | F              | S      |            |            |
| <i>Ferula communis</i> L.                      | Apiaceae     | NL       | NL   | Acc  | Acc | Acc | Acc  | Acc | 11       | 1 | 1 | 1 | 1 | 1 |   |   |                | S      |            |            |
| <i>Ferula lancerotensis</i> Parl. ex Hartung   | Apiaceae     | Acc      | Syn  | Acc  | Acc | Acc | Acc  | Syn | 0        |   |   |   |   |   | 1 | 1 | A              | S      |            |            |
| <i>Ferula latipinna</i> A.Santos               | Apiaceae     | Acc      | Acc  | Acc  | Acc | Acc | Acc  | NL  | 0        |   | 1 | 1 |   |   |   |   | A              | S      |            |            |
| <i>Festuca agustini</i> Linding.               | Poaceae      | Acc      | Acc  | Acc  | Acc | Acc | Acc  | Acc | 3        | 1 | 1 | 1 | 1 | 1 |   |   | A              | S      |            |            |
| <i>Festuca alopecuroides</i> Schousb.          | Poaceae      | Syn      | Acc  | Acc  | Syn | Syn | Syn  | Syn | 9        |   |   |   | 1 | 1 |   |   |                | P      |            |            |
| <i>Festuca ambigua</i> Le Gall                 | Poaceae      | Syn      | NL   | Acc  | Syn | Syn | Acc  | Syn | 15       | 1 |   |   | 1 |   |   | 1 |                | P      |            |            |
| <i>Festuca bromoides</i> L.                    | Poaceae      | Syn      | Acc  | Acc  | Syn | Syn | Syn  | Syn | 22       | 1 | 1 | 1 | 1 | 1 | 1 |   |                | P      |            |            |
| <i>Festuca geniculata</i> (L.) Lag. & Rodr.    | Poaceae      | Syn      | Acc  | Acc  | Syn | Syn | Syn  | Syn | 12       |   |   |   |   | 1 |   |   |                | P      |            |            |
| <i>Festuca maritima</i> L.                     | Poaceae      | Syn      | Syn  | Acc  | Syn | Syn | Acc  | Syn | 48       |   | 1 |   |   |   |   |   |                |        | P          |            |
| <i>Festuca membranacea</i> (L.) Druce          | Poaceae      | Syn      | Acc  | Acc  | Syn | Syn | Acc  | Syn | 11       | 1 |   |   |   | 1 |   |   |                | P      |            |            |
| <i>Festuca muralis</i> Kunth                   | Poaceae      | Syn      | Acc  | Acc  | Syn | Syn | Acc  | Syn | 6        | 1 | 1 | 1 |   | 1 | 1 |   |                | P      |            |            |
| <i>Festuca myuros</i> L.                       | Poaceae      | Syn      | Acc  | Acc  | Syn | Syn | Acc  | Syn | 23       | 1 | 1 | 1 | 1 | 1 | 1 | 1 |                | P      |            |            |
| <i>Festuca rubra</i> L.                        | Poaceae      | Acc      | Acc  | Acc  | Acc | Acc | Acc  | Acc | 144      |   | 1 |   |   | 1 |   |   |                | P      |            |            |
| <i>Ficus carica</i> L.                         | Moraceae     | Acc      | Acc  | Acc  | Acc | Acc | NL   | Acc | 29       | 1 | 1 | 1 | 1 | 1 | 1 | 1 |                |        | P          | C          |
| <i>Ficus elastica</i> Roxb. ex Hornem.         | Moraceae     | NL       | NL   | Acc  | Acc | Acc | Acc  | Acc | 12       |   | 1 | 1 | 1 | 1 | 1 | 1 |                |        | S          | O          |
| <i>Ficus microcarpa</i> L.f.                   | Moraceae     | Acc      | Acc  | Acc  | Acc | Acc | Acc  | Acc | 24       |   | 1 | 1 | 1 | 1 |   |   |                |        | S          | O          |
| <i>Ficus rubiginosa</i> Desf. ex Vent.         | Moraceae     | NL       | Acc  | Acc  | Acc | Acc | Acc  | Acc | 25       |   | 1 |   | 1 | 1 |   |   |                |        | S          | O          |
| <i>Filago arvensis</i> L.                      | Asteraceae   | Acc      | Acc  | Acc  | Acc | Syn | Acc  | Acc | 24       |   |   |   |   | 1 |   |   |                | P      |            |            |

| Species Name                                        | Family        | Atlantis | Muer | POWO | WFO  | COL | GBIF | TRY | POWO Syn | H | P | G | T | C | F | L | Endemic Status | Native | Non native | Ornam Crop |
|-----------------------------------------------------|---------------|----------|------|------|------|-----|------|-----|----------|---|---|---|---|---|---|---|----------------|--------|------------|------------|
| <i>Filago desertorum</i> Pomel                      | Asteraceae    | Acc      | Acc  | Acc  | Acc  | Acc | Acc  | Acc | 2        |   |   |   | 1 | 1 | 1 | 1 |                | P      |            |            |
| <i>Filago germanica</i> (L.) Huds.                  | Asteraceae    | Acc      | Syn  | Acc  | Acc  | Syn | Acc  | Acc | 7        | 1 | 1 | 1 | 1 | 1 | 1 | 1 |                | P      |            |            |
| <i>Filago lutescens</i> Jord.                       | Asteraceae    | Acc      | NL   | Acc  | Acc  | Acc | Acc  | Acc | 4        | 1 |   |   | 1 | 1 |   | 1 |                | P      |            |            |
| <i>Filago pygmaea</i> L.                            | Asteraceae    | Acc      | Acc  | Acc  | Acc  | Acc | Acc  | Acc | 1        | 1 |   |   | 1 | 1 |   | 1 |                | P      |            |            |
| <i>Filago pyramidata</i> L.                         | Asteraceae    | Acc      | Acc  | Acc  | Acc  | Acc | Acc  | Acc | 28       | 1 | 1 | 1 | 1 | 1 | 1 | 1 |                | P      |            |            |
| <i>Fimbristylis bisumbellata</i> (Forssk.) Bubani   | Cyperaceae    | Acc      | Acc  | Acc  | Acc  | Acc | Acc  | Acc | 8        |   |   |   | 1 | 1 |   |   |                | P      |            |            |
| <i>Fimbristylis ferruginea</i> (L.) Vahl            | Cyperaceae    | Acc      | Acc  | Acc  | Acc  | Acc | Acc  | Acc | 40       |   |   |   | 1 | 1 |   |   |                |        | P          |            |
| <i>Fimbristylis turkestanica</i> (Regel) B.Fedtsch. | Cyperaceae    | Acc      | NL   | Acc  | Acc  | Acc | Acc  | Acc | 4        |   |   |   | 1 | 1 |   |   |                |        | P          |            |
| <i>Foeniculum vulgare</i> Mill.                     | Apiaceae      | Acc      | NL   | Acc  | Acc  | Acc | Acc  | Acc | 31       | 1 | 1 | 1 | 1 | 1 | 1 | 1 |                | P      |            | C          |
| <i>Forsskaolea angustifolia</i> Retz.               | Urticaceae    | Acc      | Acc  | Acc  | Acc  | Acc | Acc  | Acc | 2        | 1 | 1 | 1 | 1 | 1 | 1 | 1 | A              | S      |            |            |
| <i>Fragaria vesca</i> L.                            | Rosaceae      | Acc      | Acc  | Acc  | AmUn | Acc | Acc  | Acc | 29       | 1 |   |   | 1 |   |   |   |                |        | S          | C          |
| <i>Frankenia boissieri</i> Reut. ex Boiss.          | Frankeniaceae | Acc      | Acc  | Acc  | Acc  | Acc | Acc  | Acc | 1        |   |   |   |   | 1 | 1 | 1 |                | S      |            |            |
| <i>Frankenia ericifolia</i> C.Sm. ex DC.            | Frankeniaceae | Acc      | Acc  | Acc  | Acc  | Acc | Acc  | Acc | 1        | 1 | 1 | 1 | 1 | 1 | 1 | 1 |                | S      |            |            |
| <i>Frankenia hirsuta</i> L.                         | Frankeniaceae | Syn      | Syn  | Acc  | Acc  | Acc | Acc  | Acc | 18       | 1 | 1 | 1 | 1 | 1 | 1 | 1 |                | S      |            |            |
| <i>Frankenia pulverulenta</i> L.                    | Frankeniaceae | Acc      | Acc  | Acc  | Acc  | Acc | Acc  | Acc | 8        | 1 |   |   | 1 | 1 | 1 | 1 |                | P      |            |            |
| <i>Fraxinus angustifolia</i> Vahl.                  | Oleaceae      | NL       | NL   | Acc  | Acc  | Acc | Acc  | Acc | 0        |   | 1 |   |   |   |   |   |                |        | P          |            |
| <i>Freesia refracta</i> (Jacq.) Klatt               | Iridaceae     | Acc      | Acc  | Acc  | Acc  | Acc | Acc  | Acc | 9        |   |   |   |   | 1 |   |   |                |        | S          | O          |
| <i>Fuchsia boliviana</i> Carrière                   | Onagraceae    | Acc      | Acc  | Acc  | Acc  | Acc | Acc  | Acc | 5        |   |   |   | 1 | 1 |   |   |                |        | S          | O          |
| <i>Fuchsia coccinea</i> Aiton                       | Onagraceae    | Acc      | Acc  | Acc  | Acc  | Acc | Acc  | Acc | 5        |   |   |   | 1 |   |   |   |                |        | S          | O          |
| <i>Fumaria agraria</i> Lag.                         | Papaveraceae  | Acc      | Acc  | Acc  | Acc  | Acc | Acc  | Acc | 1        |   |   |   |   | 1 |   |   |                |        | P          |            |
| <i>Fumaria bastardii</i> Boreau                     | Papaveraceae  | Acc      | Acc  | Acc  | Acc  | Acc | Acc  | Acc | 14       | 1 | 1 | 1 | 1 | 1 | 1 | 1 |                | P      |            |            |
| <i>Fumaria capreolata</i> L.                        | Papaveraceae  | Acc      | Acc  | Acc  | Acc  | Acc | Acc  | Acc | 13       |   | 1 |   | 1 | 1 | 1 | 1 |                |        | P          |            |
| <i>Fumaria coccinea</i> R.T.Lowe ex Pugsley         | Papaveraceae  | Acc      | Acc  | Acc  | Acc  | Acc | Acc  | Acc | 0        | 1 | 1 | 1 | 1 | 1 | 1 | 1 | A              | S      |            |            |
| <i>Fumaria montana</i> J.A.Schmidt                  | Papaveraceae  | Acc      | Acc  | Acc  | Acc  | Acc | Acc  | Acc | 1        | 1 | 1 | 1 | 1 | 1 | 1 | 1 |                | S      |            |            |

| Species Name                                           | Family       | Atlantis | Muer | POWO | WFO | COL | GBIF | TRY | POWO Syn | H | P | G | T | C | F | L | Endemic Status | Native | Non native | Ornam Crop |
|--------------------------------------------------------|--------------|----------|------|------|-----|-----|------|-----|----------|---|---|---|---|---|---|---|----------------|--------|------------|------------|
| <i>Fumaria muralis</i> Sond. ex W.D.J.Koch             | Papaveraceae | Acc      | Acc  | Acc  | Acc | Acc | Acc  | Acc | 2        | 1 | 1 | 1 | 1 | 1 | 1 | 1 |                | P      |            |            |
| <i>Fumaria officinalis</i> L.                          | Papaveraceae | Acc      | Acc  | Acc  | Acc | Acc | Acc  | Acc | 8        |   | 1 |   |   | 1 | 1 | 1 |                | P      |            |            |
| <i>Fumaria parviflora</i> Lam.                         | Papaveraceae | Acc      | Acc  | Acc  | Acc | Acc | Acc  | Acc | 10       | 1 |   | 1 | 1 | 1 | 1 | 1 |                |        | P          |            |
| <i>Fumaria vaillantii</i> Loisel.                      | Papaveraceae | Acc      | Acc  | Acc  | Acc | Acc | Acc  | Acc | 7        |   |   |   | 1 | 1 | 1 | 1 |                | P      |            |            |
| <i>Furcraea foetida</i> (L.) Haw.                      | Agavaceae    | Acc      | Acc  | Acc  | Acc | Acc | Acc  | Acc | 11       |   | 1 |   | 1 | 1 | 1 |   |                |        | I          | O          |
| <i>Furcraea hexapetala</i> (Jacq.) Urb.                | Asparagaceae | Acc      | NL   | Acc  | Acc | Acc | Acc  | Acc | 13       |   |   |   | 1 |   |   |   |                |        | I          | O          |
| <i>Furcraea selloana</i> Koch                          | Asparagaceae | Acc      | NL   | Acc  | Acc | Acc | Acc  | Syn | 1        |   |   |   | 1 | 1 |   |   |                |        | I          | O          |
| <i>Galactites tomentosus</i> Moench                    | Asteraceae   | Acc      | Acc  | Acc  | Acc | Acc | Acc  | Acc | 17       | 1 | 1 | 1 | 1 | 1 |   |   |                | P      |            |            |
| <i>Galinsoga parviflora</i> Cav.                       | Asteraceae   | Acc      | Acc  | Acc  | Acc | Acc | Acc  | Acc | 18       |   | 1 | 1 | 1 | 1 |   |   |                |        | S          |            |
| <i>Galinsoga quadriradiata</i> Ruiz & Pav.             | Asteraceae   | Acc      | Acc  | Acc  | Acc | Acc | Acc  | Acc | 30       |   | 1 | 1 | 1 | 1 |   |   |                |        | S          |            |
| <i>Galium aparine</i> L.                               | Rubiaceae    | Acc      | Acc  | Acc  | Acc | Acc | Acc  | Acc | 26       | 1 | 1 | 1 | 1 | 1 | 1 | 1 |                | P      |            |            |
| <i>Galium aschenbornii</i> Schauer                     | Rubiaceae    | Syn      | Syn  | Acc  | Acc | Acc | Acc  | Acc | 7        | 1 |   |   |   |   | 1 |   |                | P      |            |            |
| <i>Galium elongatum</i> C. Presl                       | Rubiaceae    | Acc      | Acc  | Acc  | Acc | Acc | Acc  | Acc | 2        |   |   |   | 1 |   |   |   |                | P      |            |            |
| <i>Galium murale</i> (L.) All.                         | Rubiaceae    | Acc      | Acc  | Acc  | Acc | Acc | Acc  | Acc | 10       | 1 | 1 | 1 | 1 | 1 | 1 | 1 |                | P      |            |            |
| <i>Galium parisiense</i> L.                            | Rubiaceae    | Acc      | Acc  | Acc  | Acc | Acc | Acc  | Acc | 24       | 1 | 1 | 1 | 1 | 1 | 1 | 1 |                | P      |            |            |
| <i>Galium scabrum</i> L.                               | Rubiaceae    | Acc      | Acc  | Acc  | Acc | Acc | Acc  | Acc | 4        | 1 | 1 | 1 | 1 | 1 | 1 |   |                | P      |            |            |
| <i>Galium setaceum</i> Lam.                            | Rubiaceae    | Acc      | Acc  | Acc  | Acc | Acc | Acc  | Acc | 9        |   | 1 | 1 | 1 | 1 | 1 | 1 |                | P      |            |            |
| <i>Galium spurium</i> L.                               | Rubiaceae    | Acc      | Acc  | Acc  | Acc | Acc | Acc  | Acc | 2        | 1 |   |   | 1 | 1 |   | 1 |                | P      |            |            |
| <i>Galium tricornutum</i> Dandy                        | Rubiaceae    | Acc      | Acc  | Acc  | Acc | Acc | Acc  | Acc | 6        |   | 1 | 1 | 1 | 1 | 1 | 1 |                | P      |            |            |
| <i>Galium verrucosum</i> Huds.                         | Rubiaceae    | Acc      | Acc  | Acc  | Acc | Acc | Acc  | Acc | 13       | 1 | 1 | 1 | 1 | 1 |   |   |                | P      |            |            |
| <i>Gamochaeta antillana</i> (Urb.) Anderb.             | Asteraceae   | Acc      | Acc  | Acc  | Syn | NL  | Acc  | Syn | 3        | 1 | 1 |   | 1 |   |   |   |                |        | S          |            |
| <i>Gamochaeta pensylvanica</i> (Willd.) Cabrera        | Asteraceae   | Acc      | Acc  | Acc  | Syn | Acc | Acc  | Syn | 6        | 1 | 1 |   | 1 | 1 | 1 |   |                |        | S          |            |
| <i>Gastroidium phleoides</i> (Nees & Meyen) C.E.Hubb.  | Poaceae      | Acc      | Acc  | Acc  | Acc | Acc | Acc  | Acc | 4        | 1 | 1 |   |   |   | 1 |   |                | P      |            |            |
| <i>Gastroidium ventricosum</i> (Gouan) Schinz & Thell. | Poaceae      | Acc      | Acc  | Acc  | Acc | Acc | Acc  | Acc | 25       |   | 1 | 1 | 1 | 1 | 1 | 1 |                | P      |            |            |



| Species Name                                   | Family         | Atlantis | Muer | POWO | WFO  | COL  | GBIF | TRY | POWO Syn | H | P | G | T | C | F | L | Endemic Status | Native | Non native | Ornam Crop |
|------------------------------------------------|----------------|----------|------|------|------|------|------|-----|----------|---|---|---|---|---|---|---|----------------|--------|------------|------------|
| <i>Gaudinia fragilis</i> (L.) P.Beauv.         | Poaceae        | Acc      | Acc  | Acc  | Acc  | Acc  | Acc  | Acc | 24       |   |   |   | 1 | 1 |   |   |                | P      |            |            |
| <i>Gazania rigens</i> (L.) Gaertn.             | Asteraceae     | Acc      | Acc  | Acc  | Acc  | Acc  | Acc  | Acc | 9        |   | 1 |   | 1 |   |   |   |                |        | S          | O          |
| <i>Genista benehoavensis</i> (Bolle) del Arco  | Fabaceae       | Acc      | Acc  | Syn  | AmUn | AmUn | Syn  | NL  |          |   | 1 |   |   |   |   |   | P              | S      |            |            |
| <i>Gennaria diphylla</i> (Link) Parl.          | Orchidaceae    | Acc      | Acc  | Acc  | Acc  | Acc  | Acc  | Acc | 12       | 1 | 1 | 1 | 1 | 1 |   | 1 |                | P      |            |            |
| <i>Geranium dissectum</i> L.                   | Geraniaceae    | Acc      | Acc  | Acc  | Acc  | Acc  | Acc  | Acc | 9        | 1 | 1 | 1 | 1 | 1 |   |   |                | P      |            |            |
| <i>Geranium molle</i> L.                       | Geraniaceae    | Acc      | Acc  | Acc  | Acc  | Acc  | Acc  | Acc | 10       | 1 | 1 | 1 | 1 | 1 | 1 | 1 |                | P      |            |            |
| <i>Geranium purpureum</i> Vill.                | Geraniaceae    | Acc      | Acc  | Acc  | Acc  | Acc  | Acc  | Acc | 3        | 1 | 1 | 1 | 1 | 1 |   | 1 |                | P      |            |            |
| <i>Geranium pyrenaicum</i> Burm.f.             | Geraniaceae    | NL       | NL   | Acc  | Acc  | Acc  | Acc  | Acc | 10       | 1 | 1 | 1 | 1 | 1 | 1 | 1 |                | P      |            |            |
| <i>Geranium reuteri</i> Aedo & Munoz Garm.     | Geraniaceae    | Acc      | Acc  | Acc  | Acc  | Acc  | Acc  | Acc | 1        | 1 | 1 | 1 | 1 | 1 |   |   | A              | S      |            |            |
| <i>Geranium robertianum</i> L.                 | Geraniaceae    | Acc      | Acc  | Acc  | Acc  | Acc  | Acc  | Acc | 17       | 1 | 1 | 1 | 1 | 1 |   |   |                | P      |            |            |
| <i>Geranium rotundifolium</i> L.               | Geraniaceae    | Acc      | Acc  | Acc  | Acc  | Acc  | Acc  | Acc | 9        | 1 | 1 | 1 | 1 | 1 | 1 | 1 |                | P      |            |            |
| <i>Geropogon hybridus</i> (L.) Sch.Bip.        | Asteraceae     | Acc      | Acc  | Acc  | Acc  | Acc  | Acc  | Acc | 6        |   | 1 | 1 | 1 |   |   |   |                | P      |            |            |
| <i>Gesnouinia arborea</i> (L.f.) Gaudich.      | Urticaceae     | Acc      | Acc  | Acc  | Acc  | Acc  | Acc  | Acc | 4        | 1 | 1 | 1 | 1 | 1 |   |   | A              | S      |            |            |
| <i>Gladiolus italicus</i> Mill.                | Iridaceae      | Acc      | Acc  | Acc  | Acc  | Acc  | Acc  | Acc | 19       | 1 | 1 | 1 | 1 | 1 | 1 | 1 |                | P      |            |            |
| <i>Glaucium corniculatum</i> (L.) Rudolph      | Papaveraceae   | Acc      | Acc  | Acc  | Acc  | Acc  | Acc  | Acc | 16       |   | 1 | 1 | 1 | 1 | 1 | 1 |                |        | P          |            |
| <i>Glaucium flavum</i> (Sm.) Fedde             | Papaveraceae   | Acc      | Acc  | Acc  | Acc  | Acc  | Acc  | Acc | 15       |   | 1 |   | 1 | 1 | 1 | 1 |                |        | P          |            |
| <i>Glebionis coronaria</i> (L.) Cass. Ex Spach | Asteraceae     | Acc      | Acc  | Acc  | Acc  | Acc  | Acc  | Acc | 19       | 1 | 1 | 1 | 1 | 1 | 1 | 1 |                |        | P          |            |
| <i>Glebionis segetum</i> (L.) Fourr.           | Asteraceae     | Acc      | Acc  | Acc  | Acc  | Acc  | Acc  | Acc | 13       |   |   | 1 | 1 | 1 |   |   |                |        | P          |            |
| <i>Gleditsia triacanthos</i> L.                | Fabaceae       | Acc      | Acc  | Acc  | Acc  | Acc  | Acc  | Acc | 23       |   |   |   |   | 1 |   |   |                |        | S          | O          |
| <i>Glinus lotoides</i> L.                      | Molluginaceae  | Acc      | NL   | Acc  | Acc  | Acc  | Acc  | Acc | 16       |   |   |   |   |   |   |   |                | P      |            |            |
| <i>Globularia ascanii</i> Bramwell & Kunkel    | Plantaginaceae | Acc      | Acc  | Acc  | Acc  | Acc  | Acc  | NL  | 0        |   |   |   |   | 1 |   |   | C              | S      |            |            |
| <i>Globularia salicina</i> Lam.                | Plantaginaceae | Acc      | Acc  | Acc  | Acc  | Acc  | Acc  | Acc | 3        | 1 | 1 | 1 | 1 | 1 |   |   |                | S      |            |            |
| <i>Globularia sarcophylla</i> Svent.           | Plantaginaceae | Acc      | Acc  | Acc  | Acc  | Acc  | Acc  | NL  | 0        |   |   |   |   | 1 |   |   | C              | S      |            |            |
| <i>Glyceria declinata</i> Breb.                | Poaceae        | Acc      | Acc  | Acc  | Acc  | Acc  | Acc  | Acc | 5        |   |   |   |   | 1 |   |   |                |        | P          |            |

| Species Name                                                             | Family          | Atlantis | Muer | POWO | WFO  | COL  | GBIF | TRY | POWO Syn | H | P | G | T | C | F | L | Endemic Status | Native | Non native | Ornam Crop |
|--------------------------------------------------------------------------|-----------------|----------|------|------|------|------|------|-----|----------|---|---|---|---|---|---|---|----------------|--------|------------|------------|
| <i>Gnidia polystachya</i> P.J.Bergius                                    | Thymelaeaceae   | Acc      | Acc  | Acc  | Acc  | AmUn | Syn  | Syn | 5        |   |   |   | 1 |   |   |   |                |        | S          | O          |
| <i>Gomphocarpus fruticosus</i> (L.) W.T.Aiton                            | Apocynaceae     | Acc      | Acc  | Acc  | Acc  | Acc  | Acc  | Acc | 1        | 1 | 1 | 1 | 1 | 1 | 1 | 1 |                |        | S          | O          |
| <i>Gonospermum canariense</i> (DC.) Less.                                | Asteraceae      | Acc      | NL   | Acc  | Acc  | Acc  | Acc  | Acc | 2        |   | 1 |   |   |   |   |   | P              | S      |            |            |
| <i>Gonospermum ferulaceum</i> (Webb) Febles                              | Asteraceae      | Acc      | NL   | Acc  | Acc  | Acc  | Acc  | NL  | 3        |   |   |   |   | 1 |   |   | C              | S      |            |            |
| <i>Gonospermum fruticosum</i> Less.                                      | Asteraceae      | Acc      | Acc  | Acc  | Acc  | Acc  | Acc  | Acc | 1        | 1 | 1 | 1 | 1 |   |   |   | A              | S      |            |            |
| <i>Gonospermum gomerae</i> Bolle                                         | Asteraceae      | Acc      | Acc  | Acc  | Acc  | Acc  | Acc  | Acc | 0        |   |   | 1 |   |   |   |   | G              | S      |            |            |
| <i>Gonospermum oshanahanii</i> (Marrero Rodr., Febles & C.Suarez) Febles | Asteraceae      | Acc      | Acc  | Acc  | AmUn | Acc  | Acc  | NL  | 1        |   |   |   |   | 1 |   |   | C              | S      |            |            |
| <i>Gonospermum ptarmiciflorum</i> (Webb & Berthel.) Febles               | Asteraceae      | Acc      | Acc  | Acc  | AmUn | Acc  | Acc  | NL  | 3        |   |   |   |   | 1 |   |   | C              | S      |            |            |
| <i>Gonospermum revolutum</i> (C.Sm. ex Buch) Sch.Bip.                    | Asteraceae      | Acc      | Acc  | Acc  | Acc  | Acc  | Acc  | Acc | 2        |   |   |   | 1 |   |   |   | T              | S      |            |            |
| <i>Gossypium barbadense</i> L.                                           | Malvaceae       | NL       | Acc  | Acc  | Acc  | Acc  | Acc  | Acc | 71       |   |   |   |   | 1 |   |   |                |        | S          | O          |
| <i>Gossypium herbaceum</i> L.                                            | Malvaceae       | Acc      | Acc  | Acc  | Acc  | Acc  | Acc  | Acc | 32       | 1 |   | 1 |   |   | 1 |   |                |        | S          | O          |
| <i>Grammitis quaerenda</i> Bolle                                         | Polypodiaceae   | Acc      | NL   | Acc  | AmUn | NL   | Acc  | NL  | 0        |   |   |   | 1 |   |   |   |                | S      |            |            |
| <i>Graptopetalum paraguayense</i> (N.E.Br.) E.Walther                    | Crassulaceae    | Acc      | Acc  | Acc  | Acc  | Acc  | Acc  | NL  | 6        |   |   |   | 1 | 1 |   |   |                |        | S          | O          |
| <i>Grevillea robusta</i> A.Cunn ex. R.Br.                                | Proteaceae      | Acc      | Acc  | Acc  | Acc  | Acc  | Acc  | Acc | 6        |   | 1 |   | 1 | 1 |   |   |                |        | S          | O          |
| <i>Guizotia abyssinica</i> (L.f.) Casse                                  | Asteraceae      | Acc      | Acc  | Acc  | Acc  | Acc  | Acc  | Acc | 17       |   | 1 |   | 1 | 1 |   |   |                |        | S          | O          |
| <i>Gymnocarpus decander</i> Forssk.                                      | Caryophyllaceae | Syn      | Syn  | Acc  | Acc  | Acc  | Acc  | Acc | 7        |   |   | 1 | 1 | 1 | 1 | 1 |                | S      |            |            |
| <i>Gymnocarpus sclerocephalus</i> (Decne.) Dahlgren & Thulin             | Caryophyllaceae | Acc      | Acc  | Acc  | Acc  | Acc  | Acc  | Acc | 4        |   |   |   | 1 |   | 1 |   |                | P      |            |            |
| <i>Gymnosporia cassinoides</i> (L'Hér.) Masf.                            | Celastraceae    | Acc      | Acc  | Acc  | Acc  | Acc  | Acc  | NL  | 5        | 1 | 1 | 1 | 1 | 1 | 1 |   | A              | S      |            |            |
| <i>Gymnosporia cryptopetala</i> Reyes-Bet. & A.Santos                    | Celastraceae    | Acc      | Acc  | Acc  | Acc  | Acc  | Acc  | NL  | 0        |   |   |   |   |   | 1 | 1 | A              | P      |            |            |
| <i>Gypsophila elegans</i> M.Bieb                                         | Caryophyllaceae | Acc      | Acc  | Acc  | Acc  | Acc  | Acc  | Acc | 4        |   |   |   | 1 |   |   |   |                |        | S          |            |
| <i>Gypsophila vaccaria</i> (L.) Sm.                                      | Caryophyllaceae | Syn      | Syn  | Acc  | Syn  | Acc  | Acc  | Syn | 38       |   |   |   | 1 |   | 1 | 1 |                | P      |            |            |
| <i>Haageocereus multangularis</i> (Haw.) F. Ritter                       | Cactaceae       | Syn      | NL   | NL   | Acc  | AmUn | Acc  | NL  |          |   |   |   | 1 |   |   |   |                |        | S          | O          |
| <i>Habenaria tridactylites</i> Lindl.                                    | Orchidaceae     | Acc      | Acc  | Acc  | Acc  | Acc  | Acc  | Acc | 1        | 1 | 1 | 1 | 1 | 1 |   | 1 | A              | S      |            |            |

| Species Name                                                    | Family           | Atlantis | Muer | POWO | WFO  | COL | GBIF | TRY | POWO Syn | H | P | G | T | C | F | L | Endemic Status | Native | Non native | Ornam Crop |
|-----------------------------------------------------------------|------------------|----------|------|------|------|-----|------|-----|----------|---|---|---|---|---|---|---|----------------|--------|------------|------------|
| <i>Hainardia cylindrica</i> (Willd.) Greuter                    | Poaceae          | Acc      | Acc  | Acc  | Acc  | Acc | Acc  | Acc | 16       |   | 1 |   | 1 | 1 |   | 1 |                | P      |            |            |
| <i>Halophila decipiens</i> Ostenfeld                            | Hydrocharitaceae | Acc      | NL   | Acc  | Acc  | Acc | Acc  | Acc | 1        | 1 | 1 |   | 1 | 1 |   |   |                | S      |            |            |
| <i>Harrisia tetraacantha</i> (Labour)                           | Cactaceae        | NL       | NL   | Acc  | Acc  | Acc | Acc  | Acc | 3        |   |   |   |   | 1 |   |   |                |        | S          | O          |
| <i>Heberdenia excelsa</i> Banks ex Schult.                      | Primulaceae      | Acc      | Acc  | Acc  | AmUn | Acc | Acc  | NL  | 8        | 1 | 1 | 1 | 1 | 1 | 1 |   |                | S      |            |            |
| <i>Hedera canariensis</i> Willd.                                | Araliaceae       | Acc      | Acc  | Acc  | Acc  | Acc | Acc  | Acc | 2        | 1 | 1 | 1 | 1 | 1 |   |   | A              | S      |            |            |
| <i>Hedera helix</i> L.                                          | Araliaceae       | Acc      | Acc  | Acc  | Acc  | Acc | Acc  | Acc | 2        |   | 1 | 1 | 1 | 1 | 1 |   |                |        | S          | O          |
| <i>Hedychium coronarium</i> J.Koenig                            | Zingiberaceae    | NL       | NL   | Acc  | Acc  | Acc | Acc  | Acc | 13       |   | 1 |   |   |   |   |   |                |        | S          |            |
| <i>Hedychium gardnerianum</i> Sheppard ex Ker Gawl.             | Zingiberaceae    | Acc      | Acc  | Acc  | Acc  | Acc | Acc  | Acc | 2        |   | 1 |   | 1 |   |   |   |                |        | I          | O          |
| <i>Hedypnois rhagadioloides</i> (L.) F.W.Schmidt                | Asteraceae       | Acc      | Acc  | Acc  | Acc  | Acc | Acc  | Acc | 35       | 1 | 1 | 1 | 1 | 1 | 1 | 1 |                | P      |            |            |
| <i>Helianthemum aganae</i> Marrero Rodr. & R. Mesa              | Cistaceae        | Acc      | Acc  | Acc  | Acc  | Acc | Acc  | NL  | 0        |   |   | 1 |   |   |   |   | G              | S      |            |            |
| <i>Helianthemum aguloi</i> Marrero Rodr. & R. Mesa              | Cistaceae        | Acc      | Acc  | Acc  | Acc  | Acc | Acc  | NL  | 0        |   |   | 1 |   |   |   |   | G              | S      |            |            |
| <i>Helianthemum bramwelliorum</i> Marrero Rodr.                 | Cistaceae        | Acc      | Acc  | Acc  | AmUn | Acc | Acc  | NL  | 0        |   |   |   |   |   |   | 1 | L              | S      |            |            |
| <i>Helianthemum broussonetii</i> Dunal                          | Cistaceae        | Acc      | Acc  | Acc  | AmUn | Acc | Acc  | Acc | 0        |   | 1 |   | 1 |   |   |   | A              | S      |            |            |
| <i>Helianthemum bystropogophyllum</i> Svent.                    | Cistaceae        | Acc      | Acc  | Acc  | AmUn | Acc | Acc  | Acc | 0        |   |   |   |   | 1 |   |   | C              | S      |            |            |
| <i>Helianthemum canariense</i> (Jacq.) Pers.                    | Cistaceae        | Acc      | Acc  | Acc  | Acc  | Acc | Acc  | Acc | 5        | 1 | 1 | 1 | 1 | 1 | 1 | 1 |                | S      |            |            |
| <i>Helianthemum cirae</i> A.Santos                              | Cistaceae        | Acc      | Acc  | Acc  | Acc  | Acc | Acc  | NL  | 0        |   | 1 |   |   |   |   |   | P              | S      |            |            |
| <i>Helianthemum gonzalezferreri</i> Marrero Rodr.               | Cistaceae        | Acc      | Acc  | Acc  | NL   | Acc | Acc  | NL  | 0        |   |   |   |   |   |   | 1 | L              | S      |            |            |
| <i>Helianthemum inaguae</i> Marrero Rodr., Gonz-Mart & Gonz-Art | Cistaceae        | Acc      | Acc  | Acc  | AmUn | Acc | Acc  | NL  | 0        |   |   |   |   | 1 |   |   | C              | S      |            |            |
| <i>Helianthemum juliae</i> Wildpret                             | Cistaceae        | Acc      | Acc  | Acc  | AmUn | Acc | Acc  | NL  | 0        |   |   |   | 1 |   |   |   | T              | S      |            |            |
| <i>Helianthemum ledifolium</i> (L.) Mill.                       | Cistaceae        | Acc      | Acc  | Acc  | Acc  | Acc | Acc  | Acc | 7        |   |   |   |   |   | 1 | 1 |                | P      |            |            |
| <i>Helianthemum linii</i> A. Santos                             | Cistaceae        | Acc      | Acc  | Acc  | NL   | Acc | Acc  | NL  | 0        |   | 1 |   |   |   |   |   | P              | S      |            |            |
| <i>Helianthemum salicifolium</i> (L.) Mill.                     | Cistaceae        | Acc      | Acc  | Acc  | Acc  | Acc | Acc  | Acc | 16       |   |   | 1 |   | 1 |   |   |                | P      |            |            |
| <i>Helianthemum teneriffae</i> Coss.                            | Cistaceae        | Acc      | Acc  | Acc  | AmUn | Acc | Acc  | NL  | 0        |   |   |   | 1 |   |   |   | T              | S      |            |            |

| Species Name                                                    | Family       | Atlantis | Muer | POWO | WFO  | COL  | GBIF | TRY | POWO Syn | H | P | G | T | C | F | L | Endemic Status | Native | Non native | Ornam Crop |
|-----------------------------------------------------------------|--------------|----------|------|------|------|------|------|-----|----------|---|---|---|---|---|---|---|----------------|--------|------------|------------|
| <i>Helianthemum tholiforme</i> Bramwell, J. Ortega & B. Navarro | Cistaceae    | Acc      | Acc  | Acc  | AmUn | Acc  | Acc  | NL  | 0        |   |   |   |   | 1 |   |   | C              | S      |            |            |
| <i>Helianthemum thymiphyllum</i> Svent.                         | Cistaceae    | Acc      | Acc  | Acc  | AmUn | Acc  | Acc  | Acc | 0        |   |   |   |   |   | 1 | 1 | A              | S      |            |            |
| <i>Helianthemum villosum</i> Thibaud                            | Cistaceae    | Acc      | Acc  | Acc  | Acc  | AmUn | Acc  | NL  | 3        |   |   |   |   |   | 1 |   |                | P      |            |            |
| <i>Helianthus annuus</i> L.                                     | Asteraceae   | Acc      | Acc  | Acc  | Acc  | Acc  | Acc  | Acc | 49       |   | 1 |   | 1 |   | 1 |   |                |        | S          | C          |
| <i>Helichrysum alucense</i> Garcia-Cas. & al.                   | Asteraceae   | Acc      | Acc  | Acc  | AmUn | Acc  | Acc  | NL  | 0        |   |   | 1 |   |   |   |   | G              | S      |            |            |
| <i>Helichrysum gossypinum</i> Sch.Bip.                          | Asteraceae   | Acc      | Acc  | Acc  | Acc  | Acc  | Acc  | Acc | 3        |   |   |   |   | 1 |   | 1 | A              | S      |            |            |
| <i>Helichrysum luteoalbum</i> (L.) Rchb.                        | Asteraceae   | Syn      | Syn  | Acc  | Acc  | Acc  | Acc  | Syn | 27       | 1 | 1 | 1 | 1 | 1 | 1 | 1 |                | P      |            |            |
| <i>Helichrysum monogynum</i> B.L.Burt. & Sunding                | Asteraceae   | Acc      | Acc  | Acc  | Acc  | Acc  | Acc  | Acc | 0        |   |   |   |   |   |   | 1 | L              | S      |            |            |
| <i>Helichrysum orientale</i> (L.) Gaertn.                       | Asteraceae   | Acc      | NL   | Acc  | AmUn | Acc  | Acc  | Acc | 8        |   |   |   |   | 1 |   | 1 |                |        | S          |            |
| <i>Helichrysum petiolare</i> Hilliard & B.L.Burt                | Asteraceae   | Acc      | Acc  | Acc  | Acc  | Acc  | Acc  | Acc | 2        |   | 1 |   |   |   |   |   |                |        | S          |            |
| <i>Helichrysum teydeum</i> (Wildpret & Greuter) Raus            | Asteraceae   | Syn      | Syn  | Acc  | Acc  | Acc  | Acc  | Syn | 2        |   |   |   | 1 |   |   |   | T              | S      |            |            |
| <i>Helichrysum teydeum</i> (Wildpret & Greuter) Raus            | Asteraceae   | NL       | Syn  | Acc  | Acc  | Acc  | Acc  | Syn | 2        |   |   |   | 1 |   |   |   | T              | S      |            |            |
| <i>Helictochloa marginata</i> (Lowe) Romero Zarco               | Poaceae      | Acc      | Acc  | Acc  | AmUn | Acc  | Acc  | Acc | 40       |   |   | 1 | 1 |   |   |   |                | P      |            |            |
| <i>Heliotropium arborescens</i> L.                              | Boraginaceae | Acc      | NL   | Acc  | Acc  | Acc  | Acc  | Acc | 11       |   |   |   | 1 | 1 |   |   |                |        | S          | O          |
| <i>Heliotropium crispum</i> Desf.                               | Boraginaceae | Syn      | Syn  | Acc  | Acc  | Syn  | Syn  | Acc | 9        | 1 | 1 | 1 | 1 | 1 | 1 | 1 |                | S      |            |            |
| <i>Heliotropium curassavicum</i> L.                             | Boraginaceae | Acc      | Acc  | Acc  | Acc  | Acc  | Acc  | Acc | 11       |   |   |   | 1 | 1 | 1 |   |                |        | S          |            |
| <i>Heliotropium europaeum</i> L.                                | Boraginaceae | Acc      | Acc  | Acc  | Acc  | Acc  | Acc  | Acc | 15       |   | 1 |   | 1 | 1 | 1 | 1 |                | P      |            |            |
| <i>Heliotropium supinum</i> L.                                  | Boraginaceae | Acc      | Acc  | Acc  | Acc  | Acc  | Acc  | Acc | 11       |   |   |   |   |   | 1 |   |                | P      |            |            |
| <i>Helminthotheca echioides</i> (L.) Holub                      | Asteraceae   | Acc      | Acc  | Acc  | Acc  | Acc  | Acc  | Acc | 16       | 1 | 1 | 1 | 1 | 1 | 1 | 1 |                | P      |            |            |
| <i>Hemarthria altissima</i> (Poir.) Stapf & C.E.Hubb.           | Poaceae      | Acc      | Acc  | Acc  | Acc  | Acc  | Acc  | Acc | 17       |   | 1 |   | 1 |   |   |   |                |        | I          |            |
| <i>Hemionitis gluckuk</i> Christenh.                            | Pteridaceae  | NL       | Syn  | Acc  | AmUn | Acc  | Syn  | NL  | 7        | 1 | 1 | 1 | 1 | 1 |   |   |                | S      |            |            |
| <i>Hemionitis guanchica</i> (Bolle) Christenh.                  | Pteridaceae  | Syn      | Syn  | Acc  | Syn  | Syn  | Syn  | Syn | 5        | 1 | 1 | 1 | 1 | 1 | 1 | 1 |                | S      |            |            |
| <i>Hemionitis pteridioides</i> (Reichard) Christenh.            | Pteridaceae  | Syn      | Syn  | Acc  | Syn  | Syn  | Syn  | Syn | 25       | 1 | 1 | 1 | 1 | 1 | 1 | 1 |                | S      |            |            |
| <i>Hemionitis pulchella</i> (Bory ex Willd.) Christenh.         | Pteridaceae  | Syn      | Syn  | Acc  | NL   | Syn  | Syn  | NL  | 4        | 1 | 1 | 1 | 1 | 1 |   |   | A              | S      |            |            |

| Species Name                                                   | Family          | Atlantis | Muer | POWO | WFO  | COL | GBIF | TRY | POWO Syn | H | P | G | T | C | F | L | Endemic Status | Native | Non native | Ornam Crop |
|----------------------------------------------------------------|-----------------|----------|------|------|------|-----|------|-----|----------|---|---|---|---|---|---|---|----------------|--------|------------|------------|
| <i>Hemionitis tinaei</i> (Tod.) Christenh.                     | Pteridaceae     | Syn      | Syn  | Acc  | Syn  | Syn | Syn  | Syn | 5        |   |   |   | 1 |   |   |   |                | S      |            |            |
| <i>Herniaria canariensis</i> Chaudhri                          | Caryophyllaceae | Acc      | Acc  | Acc  | AmUn | Acc | Acc  | Acc | 1        |   |   |   | 1 |   |   |   | T              | S      |            |            |
| <i>Herniaria cinerea</i> DC.                                   | Caryophyllaceae | Acc      | Acc  | Acc  | Syn  | Acc | Acc  | Syn | 8        | 1 |   | 1 | 1 | 1 | 1 | 1 |                | P      |            |            |
| <i>Herniaria fontanesii</i> J.Gay                              | Caryophyllaceae | Acc      | Acc  | Acc  | Acc  | Acc | Acc  | Acc | 5        |   |   |   | 1 | 1 | 1 |   |                | P      |            |            |
| <i>Hesperocyparis macrocarpa</i> (Hartw.) Bartel               | Cupressaceae    | Acc      | Syn  | Acc  | Syn  | Syn | Syn  | Syn | 9        |   | 1 |   | 1 | 1 |   |   |                |        | S          | O          |
| <i>Heteropogon contortus</i> (L.) P.Beauv. ex Roem. & Schult.  | Poaceae         | Acc      | Acc  | Acc  | Acc  | Acc | Acc  | Acc | 32       |   |   | 1 | 1 | 1 |   |   |                | P      |            |            |
| <i>Hibiscus rosa-sinensis</i> L.                               | Malvaceae       | NL       | NL   | Acc  | Acc  | Acc | Acc  | Acc | 6        |   | 1 | 1 | 1 | 1 | 1 | 1 |                |        | S          | O          |
| <i>Hibiscus schizopetalus</i> (Dyer) Hook.f.                   | Malvaceae       | NL       | NL   | Acc  | Acc  | Acc | Acc  | Acc | 2        |   |   |   | 1 | 1 |   |   |                |        | S          | O          |
| <i>Hibiscus trionum</i> L.                                     | Malvaceae       | NL       | NL   | Acc  | Acc  | Acc | Acc  | Acc | 25       |   |   |   |   | 1 |   |   |                |        | S          |            |
| <i>Himantoglossum metlesicsianum</i> (W.P.Teschner) P.Delforge | Orchidaceae     | Acc      | Acc  | Acc  | Acc  | Acc | Acc  | Acc | 1        |   | 1 |   | 1 | 1 |   |   | A              | S      |            |            |
| <i>Hippocrepis constricta</i> Kunze                            | Fabaceae        | Acc      | Acc  | Acc  | Acc  | Acc | Acc  | Acc | 5        | 1 |   |   |   | 1 |   |   |                | P      |            |            |
| <i>Hippocrepis multisiliquosa</i> L.                           | Fabaceae        | Acc      | Acc  | Acc  | Acc  | Acc | Acc  | Acc | 6        | 1 |   | 1 |   | 1 | 1 | 1 |                | P      |            |            |
| <i>Hippocrepis salzmännii</i> Boiss. & Reut.                   | Fabaceae        | NL       | NL   | Acc  | Acc  | Acc | Acc  | Acc | 1        |   |   |   |   |   | 1 | 1 |                | P      |            |            |
| <i>Hirschfeldia incana</i> (L.) Lagr.-Foss                     | Brassicaceae    | Acc      | Acc  | Acc  | Acc  | Acc | Acc  | Acc | 27       | 1 | 1 | 1 | 1 | 1 | 1 | 1 |                | P      |            |            |
| <i>Hoffmannseggia glauca</i> (Ortega) Eifert                   | Fabaceae        | Acc      | Acc  | Acc  | Acc  | Acc | Acc  | Acc | 24       |   |   |   | 1 |   |   |   |                | S      |            |            |
| <i>Holcus annuus</i> Salzm. & C. A. Meyer                      | Poaceae         | Acc      | NL   | Acc  | Acc  | Acc | Acc  | Acc | 1        |   |   |   |   | 1 |   |   |                | P      |            |            |
| <i>Holcus hierrensis</i> (Stierst.) Stierst. & M.Seq.          | Poaceae         | Syn      | Acc  | Acc  | Syn  | Acc | Acc  | NL  | 1        | 1 |   |   |   |   |   |   | H              | S      |            |            |
| <i>Holcus lanatus</i> L.                                       | Poaceae         | Acc      | Acc  | Acc  | Acc  | Acc | Acc  | Acc | 19       |   | 1 | 1 | 1 | 1 |   |   |                | P      |            |            |
| <i>Hordeum distichon</i> L.                                    | Poaceae         | Acc      | Acc  | Acc  | Acc  | Acc | Acc  | Acc | 36       |   |   |   | 1 | 1 |   |   |                |        | P          |            |
| <i>Hordeum marinum</i> Huds.                                   | Poaceae         | Acc      | Acc  | Acc  | Acc  | Acc | Acc  | Acc | 2        |   |   |   | 1 | 1 | 1 | 1 |                | P      |            |            |
| <i>Hordeum murinum</i> L.                                      | Poaceae         | Acc      | Acc  | Acc  | Acc  | Acc | Acc  | Acc | 3        |   |   |   | 1 | 1 | 1 | 1 |                | P      |            |            |
| <i>Hordeum vulgare</i> L.                                      | Poaceae         | Acc      | Acc  | Acc  | Acc  | Acc | Acc  | Acc | 129      |   | 1 |   | 1 |   | 1 | 1 |                |        | S          | C          |
| <i>Hornungia procumbens</i> (L.) Hayek                         | Brassicaceae    | Acc      | Acc  | Acc  | Acc  | Acc | Acc  | Acc | 44       |   |   |   | 1 | 1 |   |   |                |        | P          |            |

| Species Name                                              | Family           | Atlantis | Muer | POWO | WFO  | COL | GBIF | TRY | POWO Syn | H | P | G | T | C | F | L | Endemic Status | Native | Non native | Ornam Crop |
|-----------------------------------------------------------|------------------|----------|------|------|------|-----|------|-----|----------|---|---|---|---|---|---|---|----------------|--------|------------|------------|
| <i>Humulus lupulus</i> L.                                 | Cannabaceae      | Syn      | NL   | Acc  | Acc  | Acc | Acc  | Acc | 8        |   |   |   |   | 1 | 1 |   |                |        | S          | C          |
| <i>Hunnemannia fumariifolia</i> Sweet                     | Papaveraceae     | Acc      | Acc  | Acc  | Acc  | Acc | Acc  | Acc | 2        |   |   |   |   | 1 |   | 1 |                |        | S          | O          |
| <i>Hydrangea macrophylla</i> (Thunb.) Ser.                | Hydrangeaceae    | Acc      | Acc  | Acc  | Acc  | Acc | Acc  | Acc | 30       |   | 1 |   | 1 |   |   |   |                |        | S          | O          |
| <i>Hydrilla verticillata</i> (L.f.) Royle                 | Hydrocharitaceae | Acc      | Acc  | Acc  | Acc  | Acc | Acc  | Acc | 21       |   | 1 |   | 1 |   |   |   |                |        | I          |            |
| <i>Hydrocotyle bowlesioides</i> Mathias & Constance       | Apiaceae         | Acc      | NL   | Acc  | Acc  | Acc | Acc  | Acc | 0        |   |   |   | 1 |   |   |   |                |        | S          |            |
| <i>Hydrocotyle microphylla</i> A. Cunn.                   | Apiaceae         | Acc      | Acc  | Acc  | Acc  | Acc | Acc  | NL  | 0        |   |   |   | 1 |   |   |   |                |        | S          |            |
| <i>Hymenophyllum tunbrigense</i> (L.) Sm.                 | Hymenophyllaceae | Acc      | Acc  | Acc  | Acc  | Acc | Acc  | Acc | 9        |   |   | 1 | 1 | 1 |   |   |                | S      |            |            |
| <i>Hymenophyllum wilsonii</i> Hook                        | Hymenophyllaceae | Acc      | Acc  | Acc  | Syn  | Acc | Acc  | Syn | 0        |   |   | 1 | 1 | 1 |   |   |                | P      |            |            |
| <i>Hyoscyamus albus</i> L.                                | Solanaceae       | Acc      | Acc  | Acc  | Acc  | Acc | Acc  | Acc | 7        | 1 | 1 | 1 | 1 | 1 | 1 | 1 |                | P      |            |            |
| <i>Hyoseris radiata</i> L.                                | Asteraceae       | Acc      | Acc  | Acc  | Acc  | Acc | Acc  | Acc | 10       |   |   |   |   | 1 |   |   |                |        | S          |            |
| <i>Hyparrhenia arrhenobasis</i> (Hochst. ex Steud.) Stapf | Poaceae          | Acc      | Acc  | Acc  | Acc  | Acc | Acc  | Acc | 2        |   |   |   | 1 |   |   |   |                |        | S          |            |
| <i>Hyparrhenia hirta</i> (L.) Stapf                       | Poaceae          | Acc      | Acc  | Acc  | Acc  | Acc | Acc  | Acc | 25       | 1 | 1 | 1 | 1 | 1 | 1 | 1 |                | S      |            |            |
| <i>Hyparrhenia rufa</i> (Nees) Stapf                      | Poaceae          | Acc      | Acc  | Acc  | Acc  | Acc | Acc  | Acc | 4        |   |   |   | 1 |   |   |   |                |        | S          |            |
| <i>Hypecoum procumbens</i> L.                             | Papaveraceae     | Acc      | NL   | Acc  | Acc  | Acc | Acc  | Acc | 6        |   |   |   |   |   |   |   |                |        | P          |            |
| <i>Hypericum canariense</i> L.                            | Hypericaceae     | Acc      | Acc  | Acc  | Acc  | Acc | Acc  | Acc | 7        | 1 | 1 | 1 | 1 | 1 |   |   |                | S      |            |            |
| <i>Hypericum coadunatum</i> C.Sm. Ex Link.                | Hypericaceae     | Acc      | Acc  | Acc  | AmUn | Acc | Acc  | Acc | 0        |   |   |   |   | 1 |   |   | C              | S      |            |            |
| <i>Hypericum glandulosum</i> Aiton                        | Hypericaceae     | Acc      | Acc  | Acc  | AmUn | Acc | Acc  | Acc | 2        |   | 1 | 1 | 1 | 1 | 1 |   |                | S      |            |            |
| <i>Hypericum grandifolium</i> Choisy                      | Hypericaceae     | Acc      | Acc  | Acc  | Acc  | Acc | Acc  | Acc | 2        | 1 | 1 | 1 | 1 | 1 | 1 | 1 |                | S      |            |            |
| <i>Hypericum humifusum</i> L.                             | Hypericaceae     | Acc      | Acc  | Acc  | Acc  | Acc | Acc  | Acc | 7        |   | 1 |   |   |   |   |   |                | P      |            |            |
| <i>Hypericum perfoliatum</i> L.                           | Hypericaceae     | Acc      | Acc  | Acc  | Acc  | Acc | Acc  | Acc | 7        |   |   |   |   | 1 |   |   |                | P      |            |            |
| <i>Hypericum perforatum</i> L.                            | Hypericaceae     | Acc      | Acc  | Acc  | Acc  | Acc | Acc  | Acc | 3        |   | 1 |   | 1 |   |   |   |                | P      |            |            |
| <i>Hypericum reflexum</i> L.f.                            | Hypericaceae     | Acc      | Acc  | Acc  | AmUn | Acc | Acc  | Acc | 1        |   |   | 1 | 1 | 1 |   |   | A              | S      |            |            |
| <i>Hypochaeris achyrophorus</i> L.                        | Asteraceae       | Syn      | Acc  | Acc  | Acc  | Acc | Acc  | Acc | 16       |   |   |   | 1 |   |   | 1 |                | P      |            |            |
| <i>Hypochaeris glabra</i> L.                              | Asteraceae       | Acc      | Acc  | Acc  | Acc  | Acc | Acc  | Acc | 33       | 1 | 1 | 1 | 1 | 1 | 1 | 1 |                | P      |            |            |

| Species Name                                             | Family          | Atlantis | Muer | POWO | WFO  | COL | GBIF | TRY | POWO Syn | H | P | G | T | C | F | L | Endemic Status | Native | Non native | Ornam Crop |
|----------------------------------------------------------|-----------------|----------|------|------|------|-----|------|-----|----------|---|---|---|---|---|---|---|----------------|--------|------------|------------|
| <i>Hypochaeris oligocephala</i> (Svent. & Bramwell) Lack | Asteraceae      | Acc      | Acc  | Acc  | Acc  | Acc | Acc  | Acc | 1        |   |   |   | 1 |   |   |   | T              | S      |            |            |
| <i>Hypochaeris radicata</i> L.                           | Asteraceae      | Acc      | Acc  | Acc  | AmUn | Acc | Acc  | Acc | 14       | 1 | 1 | 1 | 1 |   | 1 |   |                | P      |            |            |
| <i>Iberis odorata</i> L.                                 | Brassicaceae    | Acc      | Acc  | Acc  | Acc  | Acc | Acc  | Acc | 4        |   |   |   |   | 1 |   |   |                |        | P          | O          |
| <i>Ifloga obovata</i> Bolle                              | Asteraceae      | Syn      | Acc  | Acc  | Acc  | Acc | Acc  | Syn | 1        |   |   |   | 1 |   | 1 | 1 | A              | S      |            |            |
| <i>Ifloga spicata</i> (Forssk.) Sch.Bip.                 | Asteraceae      | Acc      | Acc  | Acc  | Acc  | Acc | Acc  | Acc | 1        | 1 | 1 | 1 | 1 | 1 | 1 | 1 |                | P      |            |            |
| <i>Ilex canariensis</i> Poir.                            | Aquifoliaceae   | Acc      | Acc  | Acc  | AmUn | Acc | Acc  | Acc | 1        | 1 | 1 | 1 | 1 | 1 |   |   | A              | S      |            |            |
| <i>Ilex perado</i> Aiton                                 | Aquifoliaceae   | Acc      | Acc  | Acc  | Acc  | Acc | Acc  | Acc | 2        |   | 1 | 1 | 1 | 1 |   |   |                | S      |            |            |
| <i>Illecebrum verticillatum</i> L.                       | Caryophyllaceae | Acc      | Acc  | Acc  | Acc  | Acc | Acc  | Acc | 4        |   |   |   | 1 | 1 |   |   |                | P      |            |            |
| <i>Impatiens hawkeri</i> W.Bull.                         | Balsaminaceae   | NL       | NL   | Acc  | Acc  | Acc | Acc  | Acc | 0        |   |   |   |   | 1 |   |   |                |        | S          | O          |
| <i>Impatiens sodenii</i> Engl. & Warb.                   | Balsaminaceae   | Acc      | Acc  | Acc  | Acc  | Acc | Acc  | Acc | 5        |   | 1 |   | 1 | 1 |   |   |                |        | S          | O          |
| <i>Impatiens walleriana</i> Hook.f.                      | Balsaminaceae   | Acc      | Acc  | Acc  | Acc  | Acc | Acc  | Acc | 5        |   | 1 |   | 1 | 1 |   |   |                |        | S          | O          |
| <i>Imperata cylindrica</i> (L.) Raeusch.                 | Poaceae         | Acc      | Acc  | Acc  | Acc  | Acc | Acc  | Acc | 32       |   |   |   |   | 1 | 1 |   |                |        | I          | O          |
| <i>Ipomoea cyaneum</i> (Lindl.) M.L. Green               | Solanaceae      | NL       | NL   | Acc  | Acc  | Acc | Acc  | Acc | 8        |   |   |   | 1 |   |   |   |                |        | S          | O          |
| <i>Ipomoea batatas</i> (L.) Lam.                         | Convolvulaceae  | Acc      | Acc  | Acc  | Acc  | Acc | Acc  | Acc | 4        |   | 1 | 1 | 1 | 1 | 1 | 1 |                |        | S          | C          |
| <i>Ipomoea cairica</i> (L.) Sweet                        | Convolvulaceae  | Acc      | Acc  | Acc  | Acc  | Acc | Acc  | Acc | 38       | 1 | 1 | 1 | 1 | 1 | 1 | 1 |                |        | I          | O          |
| <i>Ipomoea corymbosa</i> (L.) Roth                       | Convolvulaceae  | Syn      | NL   | Acc  | Syn  | Syn | Syn  | Syn | 22       |   |   |   | 1 | 1 |   |   |                |        | S          | O          |
| <i>Ipomoea imperati</i> (Vahl) Griseb                    | Convolvulaceae  | Syn      | Syn  | Acc  | Acc  | Acc | Acc  | Acc | 33       |   |   |   |   | 1 |   |   | C              | P      |            | O          |
| <i>Ipomoea indica</i> (Burm.) Merr.                      | Convolvulaceae  | Acc      | Acc  | Acc  | Acc  | Acc | Acc  | Acc | 60       | 1 | 1 | 1 | 1 | 1 | 1 |   |                |        | I          | O          |
| <i>Ipomoea nil</i> (L.) Roth                             | Convolvulaceae  | Syn      | Syn  | Acc  | Acc  | Acc | Acc  | Acc | 39       |   |   |   |   |   |   | 1 |                |        | S          | O          |
| <i>Ipomoea pes-caprae</i> (L.) R.Br.                     | Convolvulaceae  | Acc      | Acc  | Acc  | Acc  | Acc | Acc  | Acc | 27       |   |   |   |   |   |   | 1 |                |        | S          | O          |
| <i>Ipomoea purpurea</i> (L.) Roth.                       | Convolvulaceae  | Acc      | Acc  | Acc  | Acc  | Acc | Acc  | Acc | 26       |   | 1 |   | 1 | 1 |   |   |                |        | S          | O          |
| <i>Iris florentina</i> L.                                | Iridaceae       | Syn      | Syn  | Acc  | AmUn | Syn | Acc  | Acc | 4        |   | 1 | 1 | 1 | 1 |   |   |                |        | S          | O          |
| <i>Iris foetidissima</i> L.                              | Iridaceae       | Acc      | Acc  | Acc  | Acc  | Acc | Acc  | Acc | 6        |   | 1 | 1 | 1 |   |   |   |                |        | S          | O          |
| <i>Iris pallida</i> Lam.                                 | Iridaceae       | Acc      | Acc  | Acc  | Acc  | Acc | Acc  | Acc | 2        |   | 1 |   | 1 |   |   |   |                |        | S          | O          |

| Species Name                                             | Family         | Atlantis | Muer | POWO | WFO | COL | GBIF | TRY | POWO Syn | H | P | G | T | C | F | L | Endemic Status | Native | Non native | Ornam Crop |
|----------------------------------------------------------|----------------|----------|------|------|-----|-----|------|-----|----------|---|---|---|---|---|---|---|----------------|--------|------------|------------|
| <i>Iris x germanica</i> L.                               | Iridaceae      | Syn      | Syn  | Acc  | Acc | Acc | Acc  | Acc | 36       |   | 1 |   |   | 1 |   |   |                |        | S          | O          |
| <i>Isatis tinctoria</i> L.                               | Brassicaceae   | Acc      | Acc  | Acc  | Acc | Acc | Acc  | Acc | 26       | 1 |   |   |   |   |   |   |                |        | S          | C          |
| <i>Isolepis cernua</i> (Vahl) Roem. & Schult.            | Cyperaceae     | Acc      | Acc  | Acc  | Acc | Acc | Acc  | Acc | 3        |   | 1 |   |   | 1 |   | 1 |                | P      |            |            |
| <i>Ixanthus viscosus</i> (Aiton) Griseb.                 | Gentianaceae   | Acc      | Acc  | Acc  | Acc | Acc | Acc  | Acc | 5        | 1 | 1 | 1 | 1 | 1 |   |   | A              | S      |            |            |
| <i>Jacaranda mimosifolia</i> D.Don                       | Bignoniaceae   | Acc      | Acc  | Acc  | Acc | Acc | Acc  | Acc | 2        |   | 1 | 1 | 1 | 1 | 1 |   |                |        | S          | O          |
| <i>Jacobaea maritima</i> (L.) Pelser & Meijden           | Asteraceae     | Acc      | Acc  | Acc  | Acc | Acc | Acc  | Acc | 5        |   | 1 |   |   | 1 |   | 1 |                |        | S          |            |
| <i>Juglans regia</i> L.                                  | Juglandaceae   | Acc      | Acc  | Acc  | Acc | Acc | Acc  | Acc | 16       |   |   |   |   | 1 |   |   |                |        | S          | C          |
| <i>Juncus acutus</i> L.                                  | Juncaceae      | Acc      | NL   | Acc  | Acc | Acc | Acc  | Acc | 0        |   | 1 | 1 | 1 | 1 | 1 |   |                | P      |            |            |
| <i>Juncus articulatus</i> L.                             | Juncaceae      | Acc      | Acc  | Acc  | Acc | Acc | Acc  | Acc | 0        |   |   |   |   | 1 |   |   |                | P      |            |            |
| <i>Juncus bufonius</i> L.                                | Juncaceae      | Acc      | Acc  | Acc  | Acc | Acc | Acc  | Acc | 21       | 1 | 1 | 1 | 1 | 1 | 1 | 1 |                | P      |            |            |
| <i>Juncus capitatus</i> Weigel                           | Juncaceae      | Acc      | Acc  | Acc  | Acc | Acc | Acc  | Acc | 7        | 1 | 1 | 1 | 1 | 1 |   |   |                | P      |            |            |
| <i>Juncus effusus</i> L.                                 | Juncaceae      | Acc      | Acc  | Acc  | Acc | Acc | Acc  | Acc | 4        |   | 1 | 1 | 1 | 1 |   |   |                | P      |            |            |
| <i>Juncus inflexus</i> L.                                | Juncaceae      | Acc      | Acc  | Acc  | Acc | Acc | Acc  | Acc | 0        |   |   |   |   | 1 |   |   |                | P      |            |            |
| <i>Juncus maritimus</i> Lam.                             | Juncaceae      | Acc      | Acc  | Acc  | Acc | Acc | Acc  | Acc | 4        |   | 1 | 1 |   | 1 |   | 1 |                | P      |            |            |
| <i>Juniperus canariensis</i> Guyot & Mathou              | Cupressaceae   | Syn      | Syn  | Acc  | Syn | Syn | Syn  | Syn | 2        | 1 | 1 | 1 | 1 | 1 |   |   |                | S      |            |            |
| <i>Juniperus cedrus</i> Webb & Berthel.                  | Cupressaceae   | Acc      | Acc  | Acc  | Acc | Acc | Acc  | Acc | 6        |   | 1 | 1 | 1 | 1 |   |   | A              | S      |            |            |
| <i>Justicia hyssopifolia</i> L.                          | Acanthaceae    | Acc      | Acc  | Acc  | Acc | Acc | Acc  | Acc | 3        |   |   | 1 | 1 |   |   |   | A              | S      |            |            |
| <i>Kalanchoe daigremontiana</i> Raym.-Hamet & H. Perrier | Crassulaceae   | Acc      | Acc  | Acc  | Acc | Acc | Acc  | Acc | 1        |   | 1 |   | 1 | 1 |   |   |                |        | S          | O          |
| <i>Kalanchoe delagoensis</i> Eckl. & Zeyh.               | Crassulaceae   | Acc      | Acc  | Acc  | Syn | Acc | Acc  | Syn | 6        |   | 1 | 1 | 1 | 1 |   |   |                |        | S          | O          |
| <i>Kalanchoe fedtschenkoi</i> Raym.-Hamet & H. Perrier   | Crassulaceae   | NL       | NL   | Acc  | Syn | Acc | Acc  | Syn | 1        |   | 1 |   |   |   | 1 |   |                |        | S          |            |
| <i>Kalanchoe pinnata</i> (Lam.) Pers.                    | Crassulaceae   | Acc      | Acc  | Acc  | Syn | Acc | Acc  | Syn | 14       |   |   | 1 |   | 1 |   |   |                |        | S          | O          |
| <i>Kalanchoe prolifera</i> (Bowie ex Hook.) Raym.-Hamet  | Crassulaceae   | Acc      | Acc  | Acc  | Syn | Acc | Acc  | Syn | 2        |   | 1 |   |   | 1 |   |   |                |        | S          | O          |
| <i>Kickxia commutata</i> (Bernh. Ex Rchb.) Fritsch       | Plantaginaceae | Acc      | NL   | Acc  | Acc | Acc | Acc  | Acc | 5        |   | 1 |   | 1 | 1 |   |   |                | P      |            |            |
| <i>Kickxia elatine</i> (L.) Dumort                       | Plantaginaceae | Acc      | NL   | Acc  | Acc | Acc | Acc  | Acc | 20       |   | 1 |   | 1 | 1 |   |   |                | P      |            |            |



| Species Name                                   | Family         | Atlantis | Muer | POWO | WFO  | COL | GBIF | TRY | POWO Syn | H | P | G | T | C | F | L | Endemic Status | Native | Non native | Ornam Crop |
|------------------------------------------------|----------------|----------|------|------|------|-----|------|-----|----------|---|---|---|---|---|---|---|----------------|--------|------------|------------|
| <i>Kickxia pendula</i> (G.Kunkel) G.Kunkel     | Plantaginaceae | Acc      | Acc  | Acc  | AmUn | Syn | Acc  | NL  | 2        |   |   |   |   | 1 |   |   | C              | S      |            |            |
| <i>Kickxia spuria</i> (L.) Dumort.             | Plantaginaceae | Acc      | NL   | Acc  | Acc  | Acc | Acc  | Acc | 12       |   | 1 |   |   |   |   |   |                |        | S          |            |
| <i>Kleinia neriifolia</i> Haw.                 | Asteraceae     | Acc      | Acc  | Acc  | Acc  | Acc | Acc  | Acc | 7        | 1 | 1 | 1 | 1 | 1 | 1 | 1 | A              | S      |            |            |
| <i>Kruberia peregrina</i> (L.) Lowe            | Apiaceae       | Acc      | Acc  | Acc  | Acc  | Acc | Acc  | Acc | 10       |   |   | 1 | 1 | 1 |   |   |                |        | P          |            |
| <i>Kumara plicatilis</i> (L.) G.D.Rowley       | Aphodelaceae   | NL       | NL   | Acc  | Syn  | Acc | Acc  | Acc | 9        |   |   |   | 1 |   |   |   |                |        | S          | O          |
| <i>Lablab purpureus</i> (L.) Sweet             | Fabaceae       | Acc      | Acc  | Acc  | Acc  | Acc | Acc  | Acc | 1        |   |   |   |   | 1 |   |   |                |        | S          | O          |
| <i>Lactuca palmensis</i> Bolle                 | Asteraceae     | Acc      | Acc  | Acc  | Acc  | Acc | Acc  | Acc | 1        |   | 1 |   |   |   |   |   | P              | S      |            |            |
| <i>Lactuca sativa</i> L.                       | Asteraceae     | Acc      | Acc  | Acc  | Acc  | Acc | Acc  | Acc | 16       |   | 1 | 1 | 1 |   | 1 | 1 |                |        | S          |            |
| <i>Lactuca serriola</i> L.                     | Asteraceae     | Acc      | Acc  | Acc  | Acc  | Acc | Acc  | Acc | 30       | 1 | 1 | 1 | 1 | 1 | 1 | 1 |                | P      |            |            |
| <i>Lactuca viminea</i> (L.) J.Presl & C.Presl. | Asteraceae     | Acc      | Acc  | Acc  | Acc  | Acc | Acc  | Acc | 6        |   | 1 |   |   | 1 |   |   |                | P      |            |            |
| <i>Lagenaria siceraria</i> (Molina) Standl.    | Cucurbitaceae  | Acc      | NL   | Acc  | Acc  | Acc | Acc  | Acc | 27       |   |   |   |   |   | 1 |   |                |        | S          | C          |
| <i>Lagurus ovatus</i> L.                       | Poaceae        | Acc      | Acc  | Acc  | Acc  | Acc | Acc  | Acc | 9        | 1 |   | 1 | 1 | 1 |   |   |                | P      |            |            |
| <i>Lamarckia aurea</i> (L.) Moench             | Poaceae        | Acc      | Acc  | Acc  | Acc  | Acc | Acc  | Acc | 7        | 1 | 1 | 1 | 1 | 1 | 1 | 1 |                | P      |            |            |
| <i>Lamium amplexicaule</i> L.                  | Lamiaceae      | Acc      | Acc  | Acc  | Acc  | Acc | Acc  | Acc | 4        | 1 | 1 | 1 | 1 | 1 | 1 | 1 |                |        | S          |            |
| <i>Lamium purpureum</i> L.                     | Lamiaceae      | Acc      | Acc  | Acc  | Acc  | Acc | Acc  | Acc | 1        |   |   | 1 | 1 | 1 |   |   |                |        | S          |            |
| <i>Lampranthus stipulaceus</i> (L.) N.E. Br.   | Aizoaceae      | NL       | NL   | Acc  | Acc  | Acc | Acc  | Acc | 5        |   |   |   | 1 |   |   |   |                |        | S          | O          |
| <i>Lantana camara</i> L.                       | Verbenaceae    | Acc      | Acc  | Acc  | Acc  | Acc | Acc  | Acc | 1        | 1 | 1 | 1 | 1 | 1 | 1 | 1 |                |        | I          | O          |
| <i>Lapsana communis</i> L.                     | Asteraceae     | Acc      | Acc  | Acc  | Acc  | Acc | Acc  | Acc | 1        |   | 1 |   | 1 |   |   |   |                | P      |            |            |
| <i>Lasiopogon muscoides</i> (Desf.) DC.        | Asteraceae     | Acc      | Acc  | Acc  | Acc  | Acc | Acc  | Acc | 2        |   |   |   |   |   | 1 | 1 |                |        | P          |            |
| <i>Lathyrus angulatus</i> L.                   | Fabaceae       | Acc      | Acc  | Acc  | Acc  | Acc | Acc  | Acc | 3        | 1 | 1 |   | 1 | 1 |   |   |                | P      |            |            |
| <i>Lathyrus annuus</i> L.                      | Fabaceae       | Acc      | Acc  | Acc  | Acc  | Acc | Acc  | Acc | 8        | 1 | 1 | 1 | 1 | 1 | 1 |   |                |        | P          |            |
| <i>Lathyrus aphaca</i> L.                      | Fabaceae       | Acc      | Acc  | Acc  | Acc  | Acc | Acc  | Acc | 14       | 1 | 1 |   | 1 | 1 |   |   |                |        | P          |            |
| <i>Lathyrus cicera</i> L.                      | Fabaceae       | Acc      | Acc  | Acc  | Acc  | Acc | Acc  | Acc | 12       | 1 | 1 |   |   | 1 |   | 1 |                |        | P          |            |
| <i>Lathyrus clymenum</i> L.                    | Fabaceae       | Acc      | Acc  | Acc  | Acc  | Acc | Acc  | Acc | 19       | 1 | 1 | 1 | 1 | 1 | 1 | 1 |                |        | P          |            |

| Species Name                                                                                | Family        | Atlantis | Muer | POWO | WFO  | COL | GBIF | TRY | POWO Syn | H | P | G | T | C | F | L | Endemic Status | Native | Non native | Ornam Crop |
|---------------------------------------------------------------------------------------------|---------------|----------|------|------|------|-----|------|-----|----------|---|---|---|---|---|---|---|----------------|--------|------------|------------|
| <i>Lathyrus ochrus</i> (L.) DC.                                                             | Fabaceae      | Acc      | Acc  | Acc  | Acc  | Acc | Acc  | Acc | 9        |   |   |   | 1 | 1 |   |   |                |        | P          |            |
| <i>Lathyrus odoratus</i> L.                                                                 | Fabaceae      | Acc      | Acc  | Acc  | Acc  | Acc | Acc  | Acc | 4        | 1 | 1 | 1 | 1 | 1 |   |   |                |        | S          | O          |
| <i>Lathyrus oleraceus</i> Lam.                                                              | Fabaceae      | Syn      | NL   | Acc  | Syn  | Syn | Syn  | Syn | 1        |   |   |   |   | 1 | 1 |   |                |        | S          |            |
| <i>Lathyrus sativus</i> L.                                                                  | Fabaceae      | Acc      | Acc  | Acc  | Acc  | Acc | Acc  | Acc | 21       | 1 | 1 | 1 | 1 | 1 | 1 | 1 |                |        | S          |            |
| <i>Lathyrus setifolius</i> L.                                                               | Fabaceae      | Acc      | Acc  | Acc  | Acc  | Acc | Acc  | Acc | 8        |   |   |   | 1 |   |   |   |                |        | P          |            |
| <i>Lathyrus sphaericus</i> Retz.                                                            | Fabaceae      | Acc      | Acc  | Acc  | Acc  | Acc | Acc  | Acc | 8        | 1 | 1 | 1 | 1 | 1 |   |   |                | P      |            |            |
| <i>Lathyrus tingitanus</i> L.                                                               | Fabaceae      | Acc      | Acc  | Acc  | Acc  | Acc | Acc  | Acc | 6        | 1 | 1 | 1 | 1 | 1 | 1 | 1 |                |        | P          |            |
| <i>Launaea arborescens</i> (Batt.) Murb.                                                    | Asteraceae    | Acc      | Acc  | Acc  | Acc  | Acc | Acc  | Acc | 6        | 1 | 1 | 1 | 1 | 1 | 1 | 1 |                | S      |            |            |
| <i>Launaea capitata</i> (Spreng.) Dandy                                                     | Asteraceae    | Acc      | Acc  | Acc  | Acc  | Acc | Acc  | Acc | 6        |   |   |   |   |   | 1 | 1 |                | P      |            |            |
| <i>Launaea mucronata</i> (Forssk.) Muschl.                                                  | Asteraceae    | Acc      | Acc  | Acc  | Acc  | Acc | Acc  | Acc | 2        |   |   |   |   |   | 1 |   | F              | P      |            |            |
| <i>Launaea nudicaulis</i> (L.) Hook f.                                                      | Asteraceae    | Acc      | Acc  | Acc  | Acc  | Acc | Acc  | Acc | 10       | 1 | 1 | 1 | 1 | 1 | 1 | 1 |                | P      |            |            |
| <i>Laurus novocanariensis</i> Rivas Mart., Lousa, Fern.Prieto, E.Dias, J.C.Costa & C.Aguiar | Lauraceae     | Acc      | Acc  | Acc  | AmUn | Acc | Acc  | Acc | 2        | 1 | 1 | 1 | 1 | 1 | 1 |   | A              | S      |            |            |
| <i>Lavandula brammwellii</i> Upson & S.Andrews                                              | Lamiaceae     | Acc      | Acc  | Acc  | Acc  | Acc | Acc  | Acc | 0        |   |   |   |   | 1 |   |   | C              | S      |            |            |
| <i>Lavandula buchii</i> Webb & Berthel.                                                     | Lamiaceae     | Acc      | NL   | Acc  | Acc  | Acc | Acc  | Acc | 0        |   |   |   | 1 |   |   |   | T              | S      |            |            |
| <i>Lavandula canariensis</i> (L.) Mill.                                                     | Lamiaceae     | Acc      | Acc  | Acc  | Acc  | Acc | Acc  | Acc | 0        | 1 | 1 | 1 | 1 | 1 | 1 |   | A              | S      |            |            |
| <i>Lavandula dentata</i> L.                                                                 | Lamiaceae     | Acc      | Acc  | Acc  | Acc  | Acc | Acc  | Acc | 1        |   | 1 | 1 | 1 | 1 |   | 1 |                |        | S          | O          |
| <i>Lavandula minutolii</i> Bolle                                                            | Lamiaceae     | Acc      | Acc  | Acc  | Acc  | Acc | Acc  | Acc | 0        |   |   |   | 1 | 1 |   |   | A              | S      |            |            |
| <i>Lavandula pedunculata</i> (Mill.) Cav.                                                   | Lamiaceae     | Acc      | Syn  | Acc  | Acc  | Acc | Acc  | Acc | 1        |   |   |   |   | 1 |   |   |                |        | S          | O          |
| <i>Lavandula pinnata</i> Lundmark                                                           | Lamiaceae     | Acc      | Acc  | Acc  | Acc  | Acc | Acc  | Acc | 3        |   |   |   |   |   | 1 | 1 |                | S      |            |            |
| <i>Lavandula stoechas</i> L.                                                                | Lamiaceae     | Acc      | NL   | Acc  | Acc  | Acc | Acc  | Acc | 1        |   |   |   | 1 | 1 |   |   |                |        | S          | O          |
| <i>Legousia falcata</i> (Ten.) Fritsch ex Janch.                                            | Campanulaceae | Acc      | Acc  | Acc  | Acc  | Acc | Acc  | Acc | 12       | 1 | 1 | 1 | 1 | 1 |   |   |                | P      |            |            |
| <i>Legousia hybrida</i> (L.) Delarbre                                                       | Campanulaceae | Acc      | Acc  | Acc  | Acc  | Acc | Acc  | Acc | 12       |   |   |   | 1 | 1 |   | 1 |                | P      |            |            |
| <i>Lemna gibba</i> L.                                                                       | Araceae       | Acc      | Acc  | Acc  | Acc  | Acc | Acc  | Acc | 8        | 1 | 1 | 1 | 1 | 1 |   |   |                | P      |            |            |
| <i>Lemna minor</i> L.                                                                       | Araceae       | Acc      | Acc  | Acc  | Acc  | Acc | Acc  | Acc | 11       |   |   | 1 | 1 | 1 | 1 | 1 |                | P      |            |            |

| Species Name                                                   | Family         | Atlantis | Muer | POWO | WFO  | COL | GBIF | TRY | POWO Syn | H | P | G | T | C | F | L | Endemic Status | Native | Non native | Ornam Crop |
|----------------------------------------------------------------|----------------|----------|------|------|------|-----|------|-----|----------|---|---|---|---|---|---|---|----------------|--------|------------|------------|
| <i>Lemna minuta</i> Kunth                                      | Araceae        | Acc      | Acc  | Acc  | Acc  | Acc | Acc  | Acc | 4        |   |   |   | 1 | 1 |   |   |                |        | I          |            |
| <i>Lens nigricans</i> (M.Bieb.) Godr.                          | Fabaceae       | Acc      | Acc  | Syn  | Acc  | Acc | Acc  | Acc | 0        | 1 | 1 |   |   |   |   |   |                |        | P          |            |
| <i>Leonotis nepetifolia</i> (L.) R.Br.                         | Lamiaceae      | Acc      | Acc  | Acc  | Acc  | Acc | Acc  | Acc | 3        | 1 | 1 |   | 1 | 1 |   |   |                |        | S          |            |
| <i>Leontodon saxatilis</i> Lam.                                | Asteraceae     | Syn      | NL   | Acc  | Acc  | Syn | Syn  | Acc | 0        | 1 | 1 | 1 | 1 | 1 | 1 | 1 |                |        | P          |            |
| <i>Leopoldia comosa</i> (L.) Parl.                             | Hyacinthaceae  | Syn      | Syn  | Acc  | Acc  | Acc | Acc  | Acc | 59       | 1 | 1 | 1 | 1 | 1 | 1 | 1 |                | P      |            |            |
| <i>Lepidium bonariense</i> L.                                  | Brassicaceae   | Acc      | Acc  | Acc  | Acc  | Acc | Acc  | Acc | 8        |   | 1 | 1 | 1 |   |   |   |                |        | S          |            |
| <i>Lepidium coronopus</i> (L.) Al-Shehbaz                      | Brassicaceae   | Acc      | Acc  | Acc  | Acc  | Acc | Acc  | Acc | 25       |   |   |   | 1 | 1 | 1 |   |                |        | P          |            |
| <i>Lepidium didymum</i> L.                                     | Brassicaceae   | Acc      | Acc  | Acc  | Acc  | Acc | Acc  | Acc | 32       | 1 | 1 | 1 | 1 | 1 | 1 | 1 |                |        | P          |            |
| <i>Lepidium sativum</i> L.                                     | Brassicaceae   | Acc      | Acc  | Acc  | Acc  | Acc | Acc  | Acc | 14       |   |   |   | 1 |   |   |   |                |        | S          |            |
| <i>Lepidium virginicum</i> L.                                  | Brassicaceae   | Acc      | Acc  | Acc  | Acc  | Acc | Acc  | Acc | 36       |   | 1 | 1 | 1 |   |   |   |                |        | S          |            |
| <i>Leucaena leucocephala</i> (Lam.) de Wit                     | Fabaceae       | Acc      | NL   | Acc  | Acc  | Acc | Acc  | Acc | 2        | 1 | 1 | 1 | 1 | 1 | 1 | 1 |                |        | I          |            |
| <i>Leucanthemum maximum</i> (Ramond) DC.                       | Asteraceae     | Acc      | NL   | Acc  | Acc  | Acc | Acc  | Acc | 11       |   |   |   | 1 |   |   |   |                |        | P          | O          |
| <i>Leuzea cynaroides</i> (C.Sm.) Font Quer ex G.López          | Asteraceae     | Syn      | Syn  | Acc  | Syn  | Acc | Syn  | NL  | 6        |   | 1 |   | 1 |   |   |   | A              | S      |            |            |
| <i>Ligustrum lucidum</i> W.T.Aiton                             | Oleaceae       | Acc      | Acc  | Acc  | Acc  | Acc | Acc  | Acc | 12       |   |   |   | 1 | 1 |   |   |                |        | S          | O          |
| <i>Ligustrum vulgare</i> L.                                    | Oleaceae       | Acc      | Acc  | Acc  | Acc  | Acc | Syn  | Acc | 11       |   |   |   | 1 |   |   |   |                |        | S          | O          |
| <i>Lilium candidum</i> L.                                      | Liliaceae      | Acc      | Acc  | Acc  | Acc  | Acc | Acc  | Acc | 3        |   |   | 1 | 1 | 1 |   |   |                |        | S          | O          |
| <i>Limoniastrum monopetalum</i> (L.) Boiss.                    | Plumbaginaceae | Acc      | Acc  | Acc  | Acc  | Acc | Acc  | Acc | 9        |   |   |   |   | 1 | 1 |   |                |        | S          |            |
| <i>Limonium arboreum</i> Erben, A.Santos & Reyes-Bet.          | Plumbaginaceae | Acc      | Acc  | Acc  | Acc  | Acc | Acc  | Syn | 3        |   | 1 |   | 1 |   |   |   | A              | S      |            |            |
| <i>Limonium benmageci</i> Marrero Rodr.                        | Plumbaginaceae | Acc      | Acc  | Acc  | AmUn | Acc | Acc  | NL  | 0        |   |   |   |   | 1 |   |   | C              | S      |            |            |
| <i>Limonium bollei</i> (Webb ex Wangerin) Erben                | Plumbaginaceae | Acc      | Acc  | Acc  | AmUn | Acc | Acc  | NL  | 1        |   |   |   |   |   | 1 |   | F              | S      |            |            |
| <i>Limonium bourgeaui</i> (Webb ex Webb) Kuntze                | Plumbaginaceae | Acc      | Acc  | Acc  | Acc  | Acc | Acc  | Acc | 0        |   |   |   |   |   | 1 | 1 | A              | S      |            |            |
| <i>Limonium brassicifolium</i> (Webb & Berthel.) Kuntze        | Plumbaginaceae | Acc      | Acc  | Acc  | Acc  | Acc | Acc  | Acc | 1        | 1 |   | 1 |   |   |   |   | A              | S      |            |            |
| <i>Limonium dendroides</i> Svent.                              | Plumbaginaceae | Acc      | Acc  | Acc  | AmUn | Acc | Acc  | Acc | 0        |   |   | 1 |   |   |   |   | G              | S      |            |            |
| <i>Limonium frutescens</i> (Lem.) Erben, A.Santos & Reyes-Bet. | Plumbaginaceae | Acc      | Acc  | Acc  | AmUn | Acc | Acc  | NL  | 3        |   |   |   | 1 |   |   |   | T              | S      |            |            |

| Species Name                                                        | Family         | Atlantis | Muer | POWO | WFO  | COL | GBIF | TRY | POWO Syn | H | P | G | T | C | F | L | Endemic Status | Native | Non native | Ornam Crop |
|---------------------------------------------------------------------|----------------|----------|------|------|------|-----|------|-----|----------|---|---|---|---|---|---|---|----------------|--------|------------|------------|
| <i>Limonium imbricatum</i> (Webb ex Girard) F.T.Hubb. ex L.H.Bailey | Plumbaginaceae | Acc      | Acc  | Acc  | AmUn | Acc | Acc  | NL  | 1        |   | 1 |   | 1 |   |   |   | A              | S      |            |            |
| <i>Limonium lobatum</i> (L.f.) Chaz.                                | Plumbaginaceae | Syn      | Syn  | Acc  | Acc  | Syn | Syn  | Acc | 11       |   |   |   | 1 |   | 1 |   |                | P      |            |            |
| <i>Limonium macrophyllum</i> (Willd. ex Spreng.) Kuntze             | Plumbaginaceae | Acc      | Acc  | Acc  | AmUn | Acc | Acc  | NL  | 2        |   |   |   | 1 |   |   |   | T              | S      |            |            |
| <i>Limonium ovalifolium</i> (Poir.) Kuntze                          | Plumbaginaceae | NL       | Acc  | Acc  | Acc  | Acc | Acc  | Acc | 8        |   |   |   |   |   | 1 | 1 |                | P      |            |            |
| <i>Limonium papillatum</i> (Webb & Berthel.) Kuntze                 | Plumbaginaceae | Acc      | Acc  | Acc  | AmUn | Acc | Acc  | NL  | 2        |   |   |   |   |   | 1 | 1 |                | S      |            |            |
| <i>Limonium pectinatum</i> (Aiton) Kuntze                           | Plumbaginaceae | Acc      | Acc  | Acc  | AmUn | Acc | Acc  | NL  | 7        | 1 | 1 | 1 | 1 | 1 |   |   | A              | S      |            |            |
| <i>Limonium perezii</i> (Stapf) F.T. Hubb.                          | Plumbaginaceae | Acc      | Acc  | Acc  | Acc  | Acc | Acc  | Acc | 1        |   |   |   | 1 |   |   |   | T              | S      |            |            |
| <i>Limonium preauxii</i> (Webb & Berthel.) Kuntze                   | Plumbaginaceae | Acc      | Acc  | Acc  | AmUn | Acc | Acc  | NL  | 1        |   |   |   |   | 1 |   |   | C              | S      |            |            |
| <i>Limonium puberulum</i> (Webb ex Lindl.) Kuntze                   | Plumbaginaceae | Acc      | Acc  | Acc  | AmUn | Acc | Acc  | NL  | 1        |   |   |   |   |   | 1 | 1 | A              | S      |            |            |
| <i>Limonium redivivum</i> (Svent.) G.Kunkel & Sunding               | Plumbaginaceae | Acc      | Acc  | Acc  | AmUn | Acc | Acc  | NL  | 1        |   |   | 1 |   |   |   |   | G              | S      |            |            |
| <i>Limonium relicticum</i> R.Mesa & A.Santos                        | Plumbaginaceae | Acc      | Acc  | Acc  | AmUn | Acc | Acc  | NL  | 0        |   |   | 1 |   |   |   |   | G              | S      |            |            |
| <i>Limonium sinuatum</i> (L.) Mill.                                 | Plumbaginaceae | Acc      | Acc  | Acc  | Acc  | Acc | Acc  | Acc | 5        |   |   |   | 1 | 1 | 1 | 1 |                | P      |            |            |
| <i>Limonium spectabile</i> (Svent.) G.Kunkel & Sunding              | Plumbaginaceae | Acc      | Acc  | Acc  | AmUn | Acc | Acc  | NL  | 1        |   |   |   | 1 |   |   |   | T              | S      |            |            |
| <i>Limonium sventenii</i> A.Santos & M.Fernandez                    | Plumbaginaceae | Acc      | Acc  | Acc  | AmUn | Acc | Acc  | Acc | 0        |   |   |   |   | 1 |   |   | C              | S      |            |            |
| <i>Limonium tuberculatum</i> (Boiss.) Kuntze                        | Plumbaginaceae | Acc      | Acc  | Acc  | Acc  | Acc | Acc  | NL  | 1        |   |   |   |   | 1 |   |   |                | S      |            |            |
| <i>Limonium vigoense</i> Marrero Rodr. & R.S.Almeida                | Plumbaginaceae | Acc      | Acc  | Acc  | AmUn | Acc | Acc  | NL  | 0        |   |   |   |   | 1 |   |   | C              | S      |            |            |
| <i>Linaria arvensis</i> (L.) Desf.                                  | Plantaginaceae | Acc      | Acc  | Acc  | Acc  | Acc | Syn  | Acc | 3        |   |   |   |   | 1 | 1 |   |                | P      |            |            |
| <i>Linaria micrantha</i> (Cav.) Hoffmanns. & Link                   | Plantaginaceae | Acc      | Acc  | Acc  | Acc  | Acc | Acc  | Acc | 3        |   |   | 1 | 1 |   | 1 | 1 |                | P      |            |            |
| <i>Linaria simplex</i> Desf.                                        | Plantaginaceae | Acc      | Acc  | Acc  | Acc  | Acc | Acc  | Acc | 7        |   |   |   | 1 | 1 |   |   |                | P      |            |            |
| <i>Linaria spartea</i> (L.) Willd.                                  | Plantaginaceae | Acc      | Acc  | Acc  | Acc  | Acc | Acc  | Acc | 13       | 1 |   |   | 1 |   |   |   |                | P      |            |            |
| <i>Linum bienne</i> Mill.                                           | Linaceae       | Acc      | Acc  | Acc  | Acc  | Acc | Acc  | Acc | 22       | 1 | 1 | 1 | 1 | 1 |   |   |                |        | P          |            |
| <i>Linum decumbens</i> Desf.                                        | Linaceae       | Acc      | Acc  | Acc  | Acc  | Acc | Acc  | Acc | 1        |   | 1 |   | 1 |   |   |   |                |        | P          |            |
| <i>Linum strictum</i> L.                                            | Linaceae       | Acc      | Acc  | Acc  | Acc  | Acc | Acc  | Acc | 19       | 1 | 1 | 1 | 1 | 1 | 1 | 1 |                | P      |            |            |
| <i>Linum trigynum</i> L.                                            | Linaceae       | Acc      | NL   | Acc  | Acc  | Acc | Acc  | Acc | 7        |   | 1 |   |   |   |   |   |                | P      |            |            |

| Species Name                                                                    | Family          | Atlantis | Muer | POWO | WFO | COL  | GBIF | TRY | POWO Syn | H | P | G | T | C | F | L | Endemic Status | Native | Non native | Ornam Crop |
|---------------------------------------------------------------------------------|-----------------|----------|------|------|-----|------|------|-----|----------|---|---|---|---|---|---|---|----------------|--------|------------|------------|
| <i>Linum usitatissimum</i> L.                                                   | Linaceae        | Acc      | Acc  | Acc  | Acc | Acc  | Acc  | Acc | 16       |   | 1 | 1 | 1 | 1 |   | 1 |                |        | P          | C          |
| <i>Lippia alba</i> (Mill.) N.E.Br. ex Britton & P.Wilson                        | Verbenaceae     | Acc      | NL   | Acc  | Acc | Acc  | Acc  | Acc | 37       |   |   |   | 1 |   |   |   |                |        | S          | O          |
| <i>Lobelia erinus</i> L.                                                        | Campanulaceae   | Acc      | Acc  | Acc  | Acc | Acc  | Acc  | Acc | 50       |   | 1 |   |   | 1 |   |   |                |        | S          | O          |
| <i>Lobularia canariensis</i> (DC.) L. Borgen                                    | Brassicaceae    | Acc      | Acc  | Acc  | Acc | Acc  | Acc  | Acc | 2        |   |   |   | 1 | 1 |   |   | A              | S      |            |            |
| <i>Lobularia libyca</i> (Viv.) Webb & Berthel.                                  | Brassicaceae    | Acc      | Acc  | Acc  | Acc | Acc  | Acc  | Acc | 10       | 1 | 1 | 1 | 1 | 1 | 1 | 1 |                | P      |            |            |
| <i>Lobularia maritima</i> (L.) Desv.                                            | Brassicaceae    | Acc      | Acc  | Acc  | Acc | Acc  | Acc  | Acc | 26       | 1 | 1 |   | 1 | 1 |   |   |                | P      |            |            |
| <i>Loeflingia hispanica</i> L.                                                  | Caryophyllaceae | Acc      | Acc  | Acc  | Acc | Acc  | Acc  | Acc | 3        |   |   |   |   |   | 1 | 1 |                | P      |            |            |
| <i>Logfia clementei</i> (Willk.) Holub                                          | Asteraceae      | Syn      | Syn  | Acc  | Syn | Acc  | Acc  | Syn | 5        |   |   |   |   |   | 1 | 1 |                | P      |            |            |
| <i>Logfia gallica</i> (L.) Coss. & Germ.                                        | Asteraceae      | Syn      | Syn  | Acc  | Syn | Acc  | Acc  | Syn | 10       | 1 | 1 | 1 | 1 | 1 | 1 | 1 |                | P      |            |            |
| <i>Logfia minima</i> (Sm.) Dumort.                                              | Asteraceae      | Syn      | Syn  | Acc  | Acc | Acc  | Acc  | Syn | 11       | 1 |   |   | 1 |   |   |   |                | P      |            |            |
| <i>Lolium arundinaceum</i> (Schreb.) Darbysh.                                   | Poaceae         | Syn      | Syn  | Acc  | Syn | Acc  | Syn  | Syn | 4        |   | 1 |   | 1 | 1 | 1 |   |                |        | P          |            |
| <i>Lolium atlantigenum</i> (St.-Yves) Banfi, Galasso, Foggi, Kopecký & Ardenghi | Poaceae         | Acc      | Acc  | Acc  | NL  | AmUn | Acc  | NL  | 4        |   | 1 |   |   |   |   |   |                |        | P          |            |
| <i>Lolium canariense</i> Steud.                                                 | Poaceae         | Acc      | Acc  | Acc  | Acc | Acc  | Acc  | Acc | 3        | 1 | 1 | 1 | 1 | 1 | 1 | 1 | A              | S      |            |            |
| <i>Lolium edwardii</i> H.Scholz, Stierst. & Gaisberg                            | Poaceae         | Acc      | Acc  | Syn  | Syn | Syn  | Syn  | Syn |          | 1 |   | 1 | 1 |   |   |   | A              | S      |            |            |
| <i>Lolium interruptum</i> (Desf.) Banfi, Galasso, Foggi, Kopecký & Ardenghi     | Poaceae         | Acc      | NL   | Acc  | NL  | AmUn | Acc  | NL  | 4        |   | 1 |   |   |   | 1 |   |                |        | P          |            |
| <i>Lolium mediterraneum</i> Schreb.                                             | Poaceae         | Acc      | NL   | Acc  | NL  | AmUn | Acc  | Syn | 9        |   | 1 |   |   |   |   |   |                |        | P          |            |
| <i>Lolium multiflorum</i> Lam.                                                  | Poaceae         | Acc      | Acc  | Acc  | Acc | Acc  | Acc  | Acc | 15       | 1 | 1 | 1 | 1 | 1 | 1 | 1 |                |        | P          |            |
| <i>Lolium perenne</i> L.                                                        | Poaceae         | Acc      | Acc  | Acc  | Acc | Acc  | Acc  | Acc | 31       | 1 | 1 | 1 | 1 | 1 | 1 | 1 |                |        | P          |            |
| <i>Lolium remotum</i> Schrank                                                   | Poaceae         | Acc      | Acc  | Acc  | Acc | Acc  | Acc  | Acc | 3        | 1 | 1 |   | 1 | 1 |   |   |                | P      |            |            |
| <i>Lolium rigidum</i> Gaudin                                                    | Poaceae         | Acc      | Acc  | Acc  | Acc | Acc  | Acc  | Acc | 29       | 1 | 1 | 1 | 1 | 1 | 1 | 1 |                | P      |            |            |
| <i>Lolium saxatile</i> H.Scholz & S.Scholz                                      | Poaceae         | Acc      | Acc  | Acc  | Acc | Acc  | Acc  | Acc | 0        |   |   |   |   |   | 1 | 1 |                | S      |            |            |
| <i>Lolium temulentum</i> L.                                                     | Poaceae         | Acc      | Acc  | Acc  | Acc | Acc  | Acc  | Acc | 32       | 1 |   |   | 1 | 1 | 1 |   |                | P      |            |            |
| <i>Lonicera etrusca</i> Santi                                                   | Caprifoliaceae  | Acc      | Acc  | Acc  | Acc | Acc  | Acc  | Acc | 15       |   |   |   | 1 |   |   |   |                |        | S          |            |

| Species Name                                                     | Family         | Atlantis | Muer | POWO | WFO | COL  | GBIF | TRY | POWO Syn | H | P | G | T | C | F | L | Endemic Status | Native | Non native | Ornam Crop |
|------------------------------------------------------------------|----------------|----------|------|------|-----|------|------|-----|----------|---|---|---|---|---|---|---|----------------|--------|------------|------------|
| <i>Lonicera japonica</i> Thunb                                   | Caprifoliaceae | Acc      | Acc  | Acc  | Acc | Acc  | Acc  | Acc | 19       |   |   |   | 1 |   |   |   |                |        | I          | O          |
| <i>Lonicera ligustrina</i> Wall.                                 | Caprifoliaceae | Syn      | Syn  | Acc  | Acc | Acc  | Acc  | Acc | 7        |   |   | 1 |   | 1 |   |   |                |        | S          | O          |
| <i>Lophocereus schottii</i> (Engelm.) Britton & Rose             | Cactaceae      | Acc      | NL   | Acc  | Acc | Syn  | Syn  | Acc | 25       |   |   |   |   | 1 |   |   |                |        | S          | O          |
| <i>Lotus angustissimus</i> L.                                    | Fabaceae       | Acc      | Acc  | Acc  | Acc | Acc  | Acc  | NL  | 14       |   | 1 |   | 1 | 1 |   |   |                |        | P          |            |
| <i>Lotus arinagensis</i> Bramwell                                | Fabaceae       | Acc      | Acc  | Acc  | Acc | Acc  | Acc  | NL  | 0        |   |   |   |   | 1 |   |   | C              | S      |            |            |
| <i>Lotus berthelotii</i> Masf.                                   | Fabaceae       | Acc      | Acc  | Acc  | Acc | Acc  | Acc  | Acc | 3        |   |   |   | 1 |   |   |   | T              | S      |            |            |
| <i>Lotus broussonetii</i> Choisy ex Ser.                         | Fabaceae       | Syn      | Syn  | Acc  | Acc | Acc  | Acc  | NL  | 2        |   |   |   | 1 | 1 |   |   | A              | S      |            |            |
| <i>Lotus callis-viridis</i> Bramwell & D.H.Davis                 | Fabaceae       | Acc      | Acc  | Acc  | Acc | Acc  | Acc  | NL  | 0        |   |   |   |   | 1 |   |   | C              | S      |            |            |
| <i>Lotus campylocladus</i> Webb & Berthel.                       | Fabaceae       | Acc      | NL   | Acc  | Acc | Acc  | Acc  | Acc | 0        | 1 | 1 |   | 1 |   |   |   | A              | S      |            |            |
| <i>Lotus corniculatus</i> L.                                     | Fabaceae       | NL       | NL   | Acc  | Acc | Acc  | Acc  | Acc | 0        |   | 1 |   |   |   |   | 1 |                | S      |            |            |
| <i>Lotus creticus</i> L.                                         | Fabaceae       | NL       | Acc  | Acc  | Acc | Acc  | Acc  | Acc | 10       |   |   | 1 |   |   | 1 |   |                | P      |            |            |
| <i>Lotus dumetorum</i> R.P.Murray                                | Fabaceae       | Acc      | Acc  | Acc  | Acc | Acc  | Acc  | NL  | 0        |   |   |   | 1 |   |   |   | T              | S      |            |            |
| <i>Lotus emeroides</i> R.P.Murray                                | Fabaceae       | Acc      | Acc  | Acc  | Acc | Acc  | Acc  | NL  | 1        |   |   | 1 |   |   |   |   | G              | S      |            |            |
| <i>Lotus eremiticus</i> A.Santos                                 | Fabaceae       | Acc      | Acc  | Acc  | Acc | Acc  | Acc  | NL  | 1        |   | 1 |   |   |   |   |   | P              | S      |            |            |
| <i>Lotus eriophthalmus</i> Webb & Berthel.                       | Fabaceae       | Syn      | Syn  | Acc  | Acc | Acc  | Acc  | NL  | 1        | 1 | 1 | 1 | 1 | 1 |   |   | A              | S      |            |            |
| <i>Lotus glaucus</i> Sol.                                        | Fabaceae       | Acc      | NL   | Acc  | Acc | Acc  | Acc  | Acc | 1        | 1 | 1 | 1 | 1 | 1 | 1 |   |                | S      |            |            |
| <i>Lotus glinoides</i> Delile                                    | Fabaceae       | Acc      | Acc  | Acc  | Acc | Acc  | Acc  | Acc | 3        | 1 |   | 1 | 1 | 1 | 1 | 1 |                |        | P          |            |
| <i>Lotus gomerythus</i> A. Portero, J. Martín-Carbajal & R. Mesa | Fabaceae       | Acc      | NL   | NL   | NL  | AmUn | Acc  | NL  |          |   |   | 1 |   |   |   |   | G              | S      |            |            |
| <i>Lotus holosericeus</i> Webb & Berthel.                        | Fabaceae       | Acc      | Acc  | Acc  | Acc | AmUn | Acc  | NL  | 0        |   |   |   |   | 1 |   |   | C              | S      |            |            |
| <i>Lotus kunkelii</i> (Esteve) Bramwell & D.H.Davis              | Fabaceae       | Acc      | Acc  | Acc  | Acc | Acc  | Acc  | NL  | 1        |   |   |   |   | 1 |   |   | C              | S      |            |            |
| <i>Lotus lancerottensis</i> Webb & Berthel.                      | Fabaceae       | Acc      | Acc  | Acc  | Acc | Acc  | Acc  | Acc | 2        |   |   |   |   |   | 1 | 1 |                | S      |            |            |
| <i>Lotus maculatus</i> Breitf.                                   | Fabaceae       | Acc      | Acc  | Acc  | Acc | Acc  | Acc  | NL  | 1        |   |   |   | 1 |   | 1 |   | A              | S      |            |            |
| <i>Lotus mascaensis</i> Burchard                                 | Fabaceae       | Acc      | Acc  | Acc  | Acc | Acc  | Acc  | Acc | 0        |   |   |   | 1 |   |   |   | T              | S      |            |            |
| <i>Lotus ornithopodioides</i> L.                                 | Fabaceae       | Acc      | Acc  | Acc  | Acc | Acc  | Acc  | Acc | 2        |   |   |   |   | 1 |   |   |                |        | P          |            |

| Species Name                                                  | Family       | Atlantis | Muer | POWO | WFO  | COL  | GBIF | TRY | POWO Syn | H | P | G | T | C | F | L | Endemic Status | Native | Non native | Ornam Crop |
|---------------------------------------------------------------|--------------|----------|------|------|------|------|------|-----|----------|---|---|---|---|---|---|---|----------------|--------|------------|------------|
| <i>Lotus parviflorus</i> Desf.                                | Fabaceae     | Acc      | Acc  | Acc  | Acc  | Acc  | Acc  | Acc | 5        |   |   |   |   | 1 | 1 |   |                | P      |            |            |
| <i>Lotus pedunculatus</i> Cav.                                | Fabaceae     | Acc      | NL   | Acc  | Acc  | Acc  | Acc  | Acc | 0        |   |   |   | 1 |   |   |   |                |        | P          |            |
| <i>Lotus pyranthus</i> P.Perez                                | Fabaceae     | Acc      | Acc  | Acc  | Acc  | Acc  | Acc  | NL  | 1        |   | 1 |   |   |   |   |   | P              | S      |            |            |
| <i>Lotus sessilifolius</i> DC.                                | Fabaceae     | Acc      | NL   | Acc  | Acc  | Acc  | Acc  | Acc | 1        |   | 1 | 1 | 1 | 1 |   |   | A              | S      |            |            |
| <i>Lotus spartioides</i> Webb & Berthel.                      | Fabaceae     | Acc      | Acc  | Acc  | Acc  | Acc  | Acc  | Acc | 0        |   |   |   |   | 1 |   |   | C              | S      |            |            |
| <i>Lotus spectabilis</i> Choisy ex Ser.                       | Fabaceae     | Syn      | Syn  | Acc  | Acc  | Acc  | Acc  | Acc | 1        |   |   |   | 1 |   |   |   | T              | S      |            |            |
| <i>Lotus tenellus</i> (Lowe) Sandral, A.Santos & D.D.Sokoloff | Fabaceae     | Acc      | Acc  | Acc  | AmUn | AmUn | Acc  | NL  | 1        |   |   |   | 1 | 1 |   |   | A              | S      |            |            |
| <i>Lotus tetragonolobus</i> L.                                | Fabaceae     | Acc      | Acc  | Acc  | Acc  | Acc  | Acc  | Acc | 10       |   |   |   | 1 | 1 |   |   |                |        | P          |            |
| <i>Lunaria annua</i> L.                                       | Brassicaceae | Acc      | Acc  | Acc  | Acc  | Acc  | Acc  | Acc | 9        |   |   |   |   | 1 |   |   |                |        | S          | O          |
| <i>Lupinus albus</i> L.                                       | Fabaceae     | Acc      | Acc  | Acc  | Acc  | Acc  | Acc  | Acc | 0        | 1 | 1 | 1 | 1 | 1 |   |   |                |        | S          | O          |
| <i>Lupinus angustifolius</i> L.                               | Fabaceae     | Acc      | Acc  | Acc  | Acc  | Acc  | Acc  | Acc | 32       | 1 | 1 |   | 1 | 1 |   |   |                |        | S          | O          |
| <i>Lupinus luteus</i> L.                                      | Fabaceae     | Acc      | Acc  | Acc  | Acc  | Acc  | Acc  | Acc | 26       |   |   |   | 1 |   |   |   |                |        | S          | O          |
| <i>Lupinus pilosus</i> L.                                     | Fabaceae     | Acc      | Acc  | Acc  | Acc  | Acc  | Acc  | Acc | 1        |   | 1 |   | 1 |   |   |   |                | P      |            |            |
| <i>Luzula canariensis</i> Poir.                               | Juncaceae    | Acc      | Acc  | Acc  | Acc  | Acc  | Acc  | Acc | 1        |   |   | 1 | 1 |   |   |   | A              | S      |            |            |
| <i>Luzula elegans</i> Lowe                                    | Juncaceae    | Acc      | Acc  | Acc  | Acc  | Acc  | Acc  | Acc | 3        | 1 | 1 | 1 | 1 | 1 |   |   |                | S      |            |            |
| <i>Luzula forsteri</i> (Sm.) DC.                              | Juncaceae    | Acc      | Acc  | Acc  | Acc  | Acc  | Acc  | Acc | 5        |   |   | 1 | 1 | 1 |   |   |                | P      |            |            |
| <i>Luzula pilosa</i> (L.) Willd.                              | Juncaceae    | Acc      | Acc  | Acc  | Acc  | Acc  | Acc  | Acc | 9        |   |   |   | 1 |   |   |   |                | P      |            |            |
| <i>Lycium europaeum</i> L.                                    | Solanaceae   | Acc      | Acc  | Acc  | Acc  | Acc  | Acc  | Acc | 10       |   | 1 | 1 | 1 |   |   |   |                |        | I          |            |
| <i>Lycium intricatum</i> Boiss.                               | Solanaceae   | Acc      | Acc  | Acc  | Syn  | Syn  | Syn  | Acc | 0        |   | 1 | 1 | 1 | 1 | 1 | 1 |                | S      |            |            |
| <i>Lysimachia arvensis</i> (L.) U. Manns & Anderb.            | Primulaceae  | Acc      | Syn  | Acc  | AmUn | Acc  | Acc  | Syn | 22       | 1 | 1 | 1 | 1 | 1 | 1 | 1 |                | P      |            |            |
| <i>Lysimachia foemina</i> (Mill.) U. Manns & Anderb.          | Primulaceae  | Acc      | Syn  | Acc  | AmUn | Acc  | Acc  | Syn | 1        |   |   |   | 1 |   |   |   |                | P      |            |            |
| <i>Lysimachia linum-stellatum</i> L.                          | Primulaceae  | Acc      | Acc  | Acc  | Acc  | Acc  | Acc  | Acc | 5        | 1 | 1 | 1 | 1 | 1 | 1 | 1 |                | P      |            |            |
| <i>Lysimachia wildpretii</i> (Valdés) U.Manns & Anderb.       | Primulaceae  | Acc      | Acc  | Acc  | AmUn | Acc  | Acc  | Acc | 1        | 1 | 1 |   | 1 | 1 | 1 | 1 |                | S      |            |            |
| <i>Lythrum hyssopifolia</i> L.                                | Lythraceae   | Acc      | Acc  | Acc  | Acc  | Acc  | Acc  | Acc | 14       | 1 | 1 | 1 | 1 | 1 | 1 | 1 |                |        | P          |            |

| Species Name                                                      | Family        | Atlantis | Muer | POWO | WFO  | COL  | GBIF | TRY | POWO Syn | H | P | G | T | C | F | L | Endemic Status | Native | Non native | Ornam Crop |
|-------------------------------------------------------------------|---------------|----------|------|------|------|------|------|-----|----------|---|---|---|---|---|---|---|----------------|--------|------------|------------|
| <i>Lythrum junceum</i> Banks & Sol.                               | Lythraceae    | Acc      | Acc  | Acc  | Acc  | Acc  | Acc  | Acc | 3        |   | 1 | 1 | 1 | 1 |   |   |                |        | P          |            |
| <i>Maclura pomifera</i> (Raf.) C.K.Schneid.                       | Moraceae      | Acc      | Acc  | Acc  | Acc  | Acc  | Acc  | Acc | 8        |   |   |   |   | 1 |   |   |                |        | S          | O          |
| <i>Macrochloa tenacissima</i> (L.) Kunth.                         | Poaceae       | Acc      | Acc  | Acc  | Syn  | Syn  | Syn  | Syn | 2        |   |   |   |   |   | 1 |   |                |        | S          |            |
| <i>Maireana brevifolia</i> (R.Br.) Paul G. Wilson                 | Amaranthaceae | Acc      | Acc  | Acc  | Acc  | Acc  | Acc  | Acc | 7        |   |   |   |   | 1 | 1 | 1 |                |        | S          |            |
| <i>Mairetis microsperma</i> (Boiss.) I.M.Johnst.                  | Boraginaceae  | Acc      | Acc  | Acc  | AmUn | Acc  | Acc  | NL  | 3        |   |   |   | 1 | 1 | 1 | 1 |                | S      |            |            |
| <i>Malcolmia maritima</i> (L.) Aiton                              | Brassicaceae  | Acc      | Acc  | Acc  | Acc  | Acc  | Acc  | Acc | 7        |   | 1 |   | 1 | 1 | 1 | 1 |                | P      |            |            |
| <i>Malephora crocea</i> (Jacq.) Schwantes                         | Aizoaceae     | Acc      | Acc  | Acc  | Acc  | Acc  | Acc  | Acc | 4        |   |   | 1 | 1 | 1 | 1 | 1 |                |        | S          | O          |
| <i>Malva acerifolia</i> (Cav.) Alef.                              | Malvaceae     | Syn      | NL   | Acc  | Syn  | Acc  | Acc  | Syn | 5        |   | 1 | 1 | 1 | 1 |   |   | A              | S      |            |            |
| <i>Malva alcea</i> L.                                             | Malvaceae     | Acc      | Acc  | Acc  | Acc  | Acc  | Acc  | Acc | 19       | 1 |   |   | 1 |   |   |   |                |        | P          |            |
| <i>Malva arborea</i> (L.) Webb & Berthel.                         | Malvaceae     | Syn      | Acc  | Acc  | Acc  | AmUn | Acc  | Acc | 10       | 1 | 1 | 1 | 1 | 1 | 1 | 1 |                |        | S          | O          |
| <i>Malva duriei</i> Spach                                         | Malvaceae     | Syn      | Syn  | Acc  | Acc  | Syn  | Syn  | Acc | 6        |   |   |   | 1 |   |   |   |                |        | S          |            |
| <i>Malva longiflora</i> (Boiss. & Reut.) Soldano, Banfi & Galasso | Malvaceae     | Syn      | Syn  | Acc  | Syn  | Acc  | Acc  | Syn | 2        |   |   |   | 1 |   |   |   |                |        | S          |            |
| <i>Malva multiflora</i> (Cav.) Soldano, Banfi & Galasso           | Malvaceae     | Syn      | Syn  | Acc  | Acc  | Acc  | Acc  | Acc | 25       | 1 | 1 | 1 | 1 | 1 | 1 | 1 |                | P      |            |            |
| <i>Malva neglecta</i> Wallr.                                      | Malvaceae     | Acc      | Acc  | Acc  | Acc  | Acc  | Acc  | Acc | 5        | 1 |   |   | 1 | 1 | 1 | 1 |                | P      |            |            |
| <i>Malva nicaeensis</i> All.                                      | Malvaceae     | Acc      | Acc  | Acc  | Acc  | Acc  | Acc  | Acc | 6        |   | 1 | 1 | 1 | 1 | 1 | 1 |                | P      |            |            |
| <i>Malva parviflora</i> L.                                        | Malvaceae     | Acc      | Acc  | Acc  | Acc  | Acc  | Acc  | Acc | 15       | 1 | 1 | 1 | 1 | 1 | 1 | 1 |                | P      |            |            |
| <i>Malva phoenicea</i> (Vent.) Alef.                              | Malvaceae     | Syn      | Syn  | Acc  | AmUn | Syn  | Acc  | NL  | 6        |   |   |   | 1 |   |   |   | T              | S      |            |            |
| <i>Malva pusilla</i> Sm.                                          | Malvaceae     | Acc      | Acc  | Acc  | Acc  | Acc  | Acc  | Acc | 14       | 1 |   |   | 1 |   |   |   |                | P      |            |            |
| <i>Malvastrum corchorifolium</i> (Desr.) Britton ex Small         | Malvaceae     | Acc      | NL   | Acc  | Acc  | Acc  | Acc  | Acc | 4        |   | 1 |   | 1 | 1 |   |   |                |        | S          |            |
| <i>Malvastrum coromandelianum</i> (L.) Garcke                     | Malvaceae     | Acc      | Acc  | Acc  | Acc  | Acc  | Acc  | Acc | 30       |   | 1 | 1 |   | 1 |   |   |                |        | S          |            |
| <i>Malvaviscus arboreus</i> Cav.                                  | Malvaceae     | NL       | NL   | Acc  | Acc  | Acc  | Acc  | Acc | 44       |   |   |   | 1 | 1 |   |   |                |        | S          | O          |
| <i>Mangifera indica</i> L.                                        | Anacardiaceae | NL       | NL   | Acc  | Acc  | Acc  | Acc  | Acc | 21       |   | 1 | 1 | 1 |   |   |   |                |        | S          | C          |
| <i>Marcetella moquiniana</i> (Webb & Berthel.) Svent.             | Rosaceae      | Acc      | Acc  | Acc  | AmUn | Acc  | Acc  | NL  | 0        |   |   | 1 | 1 | 1 |   |   | A              | S      |            |            |
| <i>Marcus-kochia littorea</i> (L.) Al-Shehbaz                     | Brassicaceae  | Syn      | Syn  | Acc  | Syn  | NL   | Acc  | Syn | 11       |   |   |   |   |   |   | 1 |                | P      |            |            |



| Species Name                                                | Family         | Atlantis | Muer | POWO | WFO  | COL | GBIF | TRY | POWO Syn | H | P | G | T | C | F | L | Endemic Status | Native | Non native | Ornam Crop |
|-------------------------------------------------------------|----------------|----------|------|------|------|-----|------|-----|----------|---|---|---|---|---|---|---|----------------|--------|------------|------------|
| <i>Marrubium vulgare</i> L.                                 | Lamiaceae      | Acc      | Acc  | Acc  | Acc  | Acc | Acc  | Acc | 9        | 1 | 1 | 1 | 1 | 1 | 1 | 1 |                | P      |            |            |
| <i>Marsilea quadrifolia</i> L.                              | Marsilenaceae  | Acc      | Acc  | Acc  | Acc  | Acc | Acc  | Acc | 8        |   |   |   |   | 1 |   |   |                |        | S          |            |
| <i>Matricaria chamomilla</i> Blanco                         | Asteraceae     | Acc      | Acc  | Acc  | AmUn | Acc | Acc  | Acc | 49       | 1 | 1 | 1 | 1 | 1 | 1 | 1 |                |        | S          | C          |
| <i>Matthiola bolleana</i> Webb ex Christ                    | Brassicaceae   | Acc      | NL   | Acc  | Syn  | Acc | Acc  | NL  | 9        |   |   |   | 1 | 1 | 1 | 1 |                | P      |            |            |
| <i>Matthiola incana</i> (L.) R.Br.                          | Brassicaceae   | Acc      | NL   | Acc  | Acc  | Acc | Acc  | Acc | 36       |   | 1 | 1 | 1 | 1 |   | 1 |                |        | S          |            |
| <i>Matthiola parviflora</i> (Schousb.) R.Br. in W. T. Aiton | Brassicaceae   | Acc      | Acc  | Acc  | Acc  | Acc | Acc  | Acc | 3        | 1 | 1 | 1 | 1 | 1 | 1 | 1 |                | P      |            |            |
| <i>Maurandya barclayana</i> Lindl.                          | Plantaginaceae | NL       | NL   | Acc  | Acc  | Acc | Acc  | Acc | 2        |   | 1 |   |   |   |   |   |                |        | S          | O          |
| <i>Maurandya scandens</i> (Cav.) Pers.                      | Plantaginaceae | Acc      | Acc  | Acc  | Acc  | Acc | Acc  | Acc | 3        |   | 1 | 1 | 1 |   |   |   |                |        | S          | O          |
| <i>Medicago arabica</i> (L.) Huds.                          | Fabaceae       | Acc      | Acc  | Acc  | Acc  | Acc | Acc  | Acc | 10       |   | 1 |   | 1 | 1 |   |   |                |        | P          |            |
| <i>Medicago arborea</i> L.                                  | Fabaceae       | Acc      | Acc  | Acc  | Acc  | Acc | Acc  | Acc | 3        | 1 |   |   |   |   |   |   |                |        | S          |            |
| <i>Medicago intertexta</i> (L.) Mill.                       | Fabaceae       | Acc      | Acc  | Acc  | Acc  | Acc | Acc  | Acc | 4        |   |   |   | 1 | 1 | 1 |   |                |        | P          |            |
| <i>Medicago laciniata</i> (L.) Mill.                        | Fabaceae       | Acc      | Acc  | Acc  | Acc  | Acc | Acc  | Acc | 8        | 1 | 1 | 1 | 1 | 1 | 1 | 1 |                | S      |            |            |
| <i>Medicago littoralis</i> Loisel                           | Fabaceae       | Acc      | Acc  | Acc  | Acc  | Acc | Acc  | Acc | 11       | 1 |   | 1 | 1 | 1 | 1 | 1 |                | S      |            |            |
| <i>Medicago lupulina</i> L.                                 | Fabaceae       | Acc      | Acc  | Acc  | Acc  | Acc | Acc  | Acc | 23       | 1 | 1 |   | 1 | 1 |   |   |                |        | P          |            |
| <i>Medicago marina</i> L.                                   | Fabaceae       | Acc      | Acc  | Acc  | Acc  | Acc | Acc  | Acc | 4        |   |   |   | 1 |   |   |   |                |        | P          |            |
| <i>Medicago minima</i> (L.) L.                              | Fabaceae       | Acc      | Acc  | Acc  | Acc  | Acc | Acc  | Acc | 27       | 1 | 1 | 1 | 1 | 1 | 1 | 1 |                | P      |            |            |
| <i>Medicago monspeliaca</i> (L.) Trautv.                    | Fabaceae       | Syn      | Syn  | Acc  | Acc  | Acc | Acc  | Acc | 7        |   |   |   |   |   |   | 1 |                | P      |            |            |
| <i>Medicago orbicularis</i> (L.) Bartal.                    | Fabaceae       | Acc      | Acc  | Acc  | Acc  | Acc | Acc  | Acc | 15       |   | 1 |   | 1 | 1 | 1 | 1 |                |        | P          |            |
| <i>Medicago polymorpha</i> L.                               | Fabaceae       | Acc      | Acc  | Acc  | Acc  | Acc | Acc  | Acc | 69       | 1 | 1 | 1 | 1 | 1 | 1 | 1 |                | P      |            |            |
| <i>Medicago sativa</i> L.                                   | Fabaceae       | Acc      | Acc  | Acc  | Acc  | Acc | Acc  | Acc | 1        | 1 | 1 |   | 1 | 1 | 1 | 1 |                |        | S          | C          |
| <i>Medicago soleirolii</i> Duby                             | Fabaceae       | Acc      | Acc  | Acc  | Acc  | Acc | Acc  | Acc | 1        |   |   |   |   | 1 |   | 1 |                | P      |            |            |
| <i>Medicago tornata</i> (L.) Mill.                          | Fabaceae       | Acc      | Syn  | Acc  | Acc  | Acc | Acc  | Acc | 21       | 1 | 1 | 1 | 1 | 1 | 1 | 1 |                | P      |            |            |
| <i>Medicago truncatula</i> Gaertn.                          | Fabaceae       | Acc      | Acc  | Acc  | Acc  | Acc | Acc  | Acc | 11       | 1 | 1 | 1 | 1 | 1 |   | 1 |                | P      |            |            |
| <i>Medicago turbinata</i> (L.) All.                         | Fabaceae       | Acc      | Acc  | Acc  | Acc  | Acc | Acc  | Acc | 10       |   |   | 1 |   |   |   |   |                |        | P          |            |

| Species Name                                                | Family        | Atlantis | Muer | POWO | WFO  | COL | GBIF | TRY | POWO Syn | H | P | G | T | C | F | L | Endemic Status | Native | Non native | Ornam Crop |
|-------------------------------------------------------------|---------------|----------|------|------|------|-----|------|-----|----------|---|---|---|---|---|---|---|----------------|--------|------------|------------|
| <i>Megaskepsma erythrochlamys</i> Lindau                    | Acanthaceae   | NL       | NL   | Acc  | Acc  | Acc | Acc  | Acc | 1        |   |   |   |   |   |   | 1 |                |        | S          | O          |
| <i>Megathyrsus maximus</i> (Jacq.) B.K.Simon & S.W.L.Jacobs | Poaceae       | Acc      | Acc  | Acc  | Syn  | Syn | Syn  | Syn | 33       |   | 1 | 1 | 1 | 1 |   |   |                |        | S          |            |
| <i>Melampodium montanum</i> Benth.                          | Asteraceae    | NL       | NL   | Acc  | Acc  | Acc | Acc  | Acc | 2        |   | 1 |   |   |   |   |   |                |        | S          |            |
| <i>Melia azedarach</i> L.                                   | Meliaceae     | Acc      | Acc  | Acc  | Acc  | Acc | Acc  | Acc | 39       | 1 | 1 |   | 1 | 1 |   |   |                |        | I          | O          |
| <i>Melianthus comosus</i> Vahl                              | Meliantaceae  | Acc      | NL   | Acc  | Acc  | Acc | Acc  | Acc | 1        |   |   |   |   |   | 1 |   |                |        | S          | O          |
| <i>Melica canariensis</i> W.Hempel                          | Poaceae       | Acc      | Acc  | Acc  | Acc  | Acc | Acc  | Acc | 0        |   |   | 1 | 1 | 1 | 1 | 1 |                | S      |            |            |
| <i>Melica minuta</i> L.                                     | Poaceae       | NL       | NL   | Acc  | Acc  | Acc | Acc  | Acc | 20       |   |   | 1 | 1 | 1 |   | 1 |                | S      |            |            |
| <i>Melica teneriffae</i> Hack. ex Christ                    | Poaceae       | Acc      | Acc  | Acc  | Acc  | Acc | Acc  | Acc | 0        |   |   | 1 | 1 | 1 |   | 1 | A              | S      |            |            |
| <i>Melilotus albus</i> Medik.                               | Fabaceae      | Acc      | Acc  | Acc  | Acc  | Acc | Acc  | Acc | 20       |   | 1 |   |   | 1 |   |   |                |        | S          |            |
| <i>Melilotus indicus</i> (L.) All.                          | Fabaceae      | Acc      | Acc  | Acc  | Acc  | Acc | Acc  | Acc | 22       | 1 | 1 | 1 | 1 | 1 | 1 | 1 |                |        | S          |            |
| <i>Melilotus infestus</i> Guss.                             | Fabaceae      | Acc      | Acc  | Acc  | Acc  | Acc | Acc  | Acc | 4        | 1 |   |   |   |   |   |   |                |        | S          |            |
| <i>Melilotus officinalis</i> (L.) Lam.                      | Fabaceae      | Acc      | NL   | Acc  | AmUn | Acc | Acc  | Acc | 44       |   |   |   |   | 1 |   |   |                |        | S          |            |
| <i>Melilotus segetalis</i> (Brot.) Ser.                     | Fabaceae      | NL       | NL   | Acc  | Acc  | Acc | Acc  | Acc | 6        |   |   |   | 1 | 1 | 1 |   |                | P      |            |            |
| <i>Melilotus sulcatus</i> Desf.                             | Fabaceae      | Acc      | Acc  | Acc  | Acc  | Acc | Acc  | Acc | 8        | 1 | 1 | 1 | 1 | 1 | 1 | 1 |                |        | S          |            |
| <i>Melinis minutiflora</i> P.Beauv.                         | Poaceae       | Acc      | Acc  | Acc  | Acc  | Acc | Acc  | Acc | 13       |   |   | 1 | 1 | 1 | 1 | 1 |                |        | P          |            |
| <i>Melinis repens</i> (Willd.) Zizka                        | Poaceae       | Acc      | Acc  | Acc  | Acc  | Acc | Acc  | Acc | 4        |   |   |   | 1 |   |   |   |                |        | I          |            |
| <i>Melissa officinalis</i> L.                               | Lamiaceae     | Acc      | Acc  | Acc  | Acc  | Acc | Acc  | Acc | 3        |   | 1 | 1 | 1 | 1 |   |   |                |        | S          | C          |
| <i>Mentha aquatica</i> L.                                   | Lamiaceae     | Acc      | NL   | Acc  | Acc  | Acc | Acc  | Acc | 87       |   |   |   | 1 | 1 |   |   |                |        | P          |            |
| <i>Mentha arvensis</i> L.                                   | Lamiaceae     | Acc      | Acc  | Acc  | Acc  | Acc | Acc  | Acc | 142      |   | 1 |   | 1 |   |   |   |                |        | S          |            |
| <i>Mentha longifolia</i> (L.) L.                            | Lamiaceae     | Acc      | Acc  | Acc  | Acc  | Acc | Acc  | Acc | 1        |   | 1 | 1 | 1 | 1 |   |   |                |        | S          |            |
| <i>Mentha pulegium</i> L.                                   | Lamiaceae     | Acc      | Acc  | Acc  | Acc  | Acc | Acc  | Acc | 35       |   | 1 | 1 | 1 | 1 |   |   |                |        | S          | C          |
| <i>Mentha spicata</i> L.                                    | Lamiaceae     | Acc      | NL   | Acc  | Acc  | Acc | Acc  | Acc | 0        |   | 1 | 1 | 1 | 1 |   |   |                |        | S          |            |
| <i>Mentha suaveolens</i> Ehrh.                              | Lamiaceae     | Acc      | Acc  | Acc  | Acc  | Acc | Acc  | Acc | 0        |   |   | 1 | 1 | 1 | 1 |   |                |        | S          |            |
| <i>Mercurialis annua</i> L.                                 | Euphorbiaceae | Acc      | Acc  | Acc  | Acc  | Acc | Acc  | Acc | 9        | 1 | 1 | 1 | 1 | 1 | 1 | 1 |                |        | P          |            |

| Species Name                                        | Family        | Atlantis | Muer | POWO | WFO | COL  | GBIF | TRY | POWO Syn | H | P | G | T | C | F | L | Endemic Status | Native | Non native | Ornam Crop |
|-----------------------------------------------------|---------------|----------|------|------|-----|------|------|-----|----------|---|---|---|---|---|---|---|----------------|--------|------------|------------|
| <i>Mercurialis canariensis</i> Obbard & S.A.Harris  | Euphorbiaceae | Acc      | Acc  | Acc  | Acc | Acc  | Acc  | Acc | 0        | 1 | 1 |   | 1 |   |   | 1 | A              | S      |            |            |
| <i>Mesembryanthemum cordifolium</i> L.f.            | Aizoaceae     | Acc      | Acc  | Acc  | Acc | Acc  | Acc  | Acc | 3        | 1 | 1 | 1 | 1 | 1 | 1 | 1 |                |        | S          | O          |
| <i>Mesembryanthemum crystallinum</i> L.             | Aizoaceae     | Acc      | Acc  | Acc  | Acc | Acc  | Acc  | Acc | 5        | 1 | 1 | 1 | 1 | 1 | 1 | 1 |                | P      |            | O          |
| <i>Mesembryanthemum nodiflorum</i> L.               | Aizoaceae     | Acc      | Acc  | Acc  | Acc | Acc  | Acc  | Acc | 12       | 1 | 1 | 1 | 1 | 1 | 1 | 1 |                | P      |            | O          |
| <i>Mesembryanthemum theurkauffii</i> (Maire) Maire  | Aizoaceae     | Acc      | Acc  | Acc  | Acc | Syn  | Syn  | Acc | 2        |   |   |   |   |   | 1 |   |                | P      |            | O          |
| <i>Micromeria benthamii</i> Webb & Berthel.         | Lamiaceae     | Acc      | Acc  | Acc  | Acc | Acc  | Acc  | Acc | 3        |   |   |   |   | 1 |   |   | C              | S      |            |            |
| <i>Micromeria canariensis</i> (P. Pérez) Puppo      | Lamiaceae     | Acc      | NL   | Acc  | NL  | Acc  | Acc  | NL  | 3        |   |   |   |   | 1 |   |   | C              | S      |            |            |
| <i>Micromeria densiflora</i> Benth.                 | Lamiaceae     | Acc      | Acc  | Acc  | Acc | Acc  | Acc  | Acc | 0        |   |   |   | 1 |   |   |   | T              | S      |            |            |
| <i>Micromeria ericifolia</i> (Roth) Bornm.          | Lamiaceae     | Acc      | NL   | Acc  | NL  | Syn  | Syn  | NL  | 4        |   |   |   | 1 |   |   |   | T              | S      |            |            |
| <i>Micromeria glomerata</i> P.Pérez                 | Lamiaceae     | Acc      | Acc  | Acc  | Acc | Acc  | Acc  | Acc | 1        |   |   |   | 1 |   |   |   | T              | S      |            |            |
| <i>Micromeria gomerensis</i> (P.Pérez) Puppo        | Lamiaceae     | Acc      | Acc  | Acc  | NL  | Acc  | Acc  | NL  | 3        |   |   | 1 |   |   |   |   | G              | S      |            |            |
| <i>Micromeria helianthemifolia</i> Webb & Berthel.  | Lamiaceae     | Acc      | Acc  | Acc  | Acc | Acc  | Acc  | Acc | 7        |   |   |   |   | 1 |   |   | C              | S      |            |            |
| <i>Micromeria herpyllomorpha</i> Webb & Berthel.    | Lamiaceae     | Acc      | NL   | Acc  | Acc | Acc  | Acc  | Acc | 1        |   | 1 |   |   |   |   |   | P              | S      |            |            |
| <i>Micromeria hierrensis</i> (P. Perez) Puppo       | Lamiaceae     | Acc      | NL   | Acc  | NL  | Acc  | Acc  | NL  | 3        | 1 |   |   |   |   |   |   | H              | S      |            |            |
| <i>Micromeria lachnophylla</i> Webb & Berthel.      | Lamiaceae     | Acc      | Acc  | Acc  | Acc | Acc  | Acc  | Acc | 7        |   |   |   | 1 |   |   |   | T              | S      |            |            |
| <i>Micromeria lanata</i> (C.Sm. Ex Link) Benth.     | Lamiaceae     | Acc      | Acc  | Acc  | Acc | Acc  | Acc  | Acc | 2        |   |   |   |   | 1 |   |   | C              | S      |            |            |
| <i>Micromeria lasiophylla</i> Webb & Berthel.       | Lamiaceae     | Acc      | Acc  | Acc  | Acc | Acc  | Acc  | Acc | 1        |   | 1 |   | 1 |   |   |   | A              | S      |            |            |
| <i>Micromeria lepida</i> Webb & Berthel.            | Lamiaceae     | Acc      | NL   | Acc  | Acc | Acc  | Acc  | Acc | 2        |   |   | 1 |   |   |   |   | G              | S      |            |            |
| <i>Micromeria leucantha</i> Svent. ex P.Perez       | Lamiaceae     | Acc      | Acc  | Acc  | Acc | Acc  | Acc  | Acc | 1        |   |   |   |   | 1 |   |   | C              | S      |            |            |
| <i>Micromeria mahensis</i> Puppo                    | Lamiaceae     | Acc      | NL   | NL   | NL  | AmUn | Acc  | NL  |          |   |   |   |   |   | 1 | 1 | A              | S      |            |            |
| <i>Micromeria pedro-luisii</i> Puppo                | Lamiaceae     | Acc      | Acc  | Acc  | NL  | Acc  | Acc  | NL  | 0        |   |   | 1 |   |   |   |   | G              | S      |            |            |
| <i>Micromeria pineolens</i> Svent.                  | Lamiaceae     | Acc      | Acc  | Acc  | Acc | Acc  | Acc  | Acc | 1        |   |   |   |   | 1 |   |   | C              | S      |            |            |
| <i>Micromeria rivas-martinezii</i> Wildpret         | Lamiaceae     | Acc      | Acc  | Acc  | Acc | Acc  | Acc  | Acc | 2        |   |   |   | 1 |   |   |   | T              | S      |            |            |
| <i>Micromeria rupestris</i> (Webb & Berthel.) Puppo | Lamiaceae     | NL       | Acc  | Acc  | Syn | Syn  | Syn  | NL  | 0        |   |   |   |   |   | 1 | 1 | A              | S      |            |            |

| Species Name                                           | Family          | Atlantis | Muer | POWO | WFO  | COL  | GBIF | TRY | POWO Syn | H | P | G | T | C | F | L | Endemic Status | Native | Non native | Ornam Crop |
|--------------------------------------------------------|-----------------|----------|------|------|------|------|------|-----|----------|---|---|---|---|---|---|---|----------------|--------|------------|------------|
| <i>Micromeria teneriffae</i> (Poir.) Benth. Ex G.Don   | Lamiaceae       | Acc      | Acc  | Acc  | Acc  | Acc  | Acc  | Acc | 8        |   |   |   | 1 |   |   |   | T              | S      |            |            |
| <i>Micromeria tenuis</i> (Link) Webb & Berthel.        | Lamiaceae       | Acc      | NL   | Acc  | Acc  | Acc  | Acc  | Acc | 1        |   |   |   |   | 1 |   |   | C              | S      |            |            |
| <i>Micromeria tragothymus</i> Webb & Berthel.          | Lamiaceae       | Acc      | NL   | Acc  | Acc  | Acc  | Acc  | NL  | 3        |   |   |   | 1 |   |   |   | T              | S      |            |            |
| <i>Mirabilis jalapa</i> L.                             | Nyctaginaceae   | Acc      | Acc  | Acc  | Acc  | Acc  | Acc  | Acc | 33       | 1 | 1 | 1 | 1 | 1 | 1 | 1 |                |        | I          | O          |
| <i>Misopates calycinum</i> (Lange) Rothm.              | Plantaginaceae  | Acc      | Acc  | Acc  | Acc  | Acc  | Acc  | Acc | 5        |   |   |   |   |   | 1 |   |                | P      |            |            |
| <i>Misopates orontium</i> (L.) Raf.                    | Plantaginaceae  | Acc      | Acc  | Acc  | Acc  | Acc  | Acc  | Acc | 13       | 1 | 1 | 1 | 1 | 1 | 1 | 1 |                | P      |            |            |
| <i>Misopates salvagense</i> D.A.Sutton                 | Plantaginaceae  | Acc      | Acc  | Acc  | AmUn | Acc  | Acc  | NL  | 0        | 1 |   |   |   |   | 1 | 1 |                | S      |            |            |
| <i>Moehringia pentandra</i> J.Gay                      | Caryophyllaceae | Acc      | Acc  | Acc  | Acc  | Acc  | Acc  | Acc | 2        | 1 | 1 | 1 | 1 | 1 |   | 1 |                | P      |            |            |
| <i>Momordica charantia</i> L.                          | Cucurbitaceae   | Acc      | NL   | Acc  | Acc  | AmUn | Acc  | Acc | 22       | 1 | 1 |   |   |   |   |   |                |        | S          | C          |
| <i>Monanthes anagensis</i> Praeger                     | Crassulaceae    | Acc      | Acc  | Acc  | Acc  | Acc  | Acc  | NL  | 0        |   |   |   | 1 |   |   |   | T              | S      |            |            |
| <i>Monanthes brachycaulos</i> (Webb. & Berth.) R. Lowe | Crassulaceae    | Acc      | Acc  | Acc  | Acc  | Acc  | Acc  | Acc | 4        |   |   |   | 1 | 1 |   |   | A              | S      |            |            |
| <i>Monanthes dasyphylla</i> Svent.                     | Crassulaceae    | NL       | NL   | Acc  | Syn  | Syn  | Syn  | NL  | 0        |   |   |   | 1 |   |   |   | T              | S      |            |            |
| <i>Monanthes ictérica</i> (Webb & Bolle) Christ        | Crassulaceae    | Acc      | Acc  | Acc  | Acc  | Acc  | Acc  | NL  | 2        |   |   | 1 | 1 |   |   |   | A              | S      |            |            |
| <i>Monanthes laxiflora</i> (DC.) Bolle ex Bornmuller   | Crassulaceae    | Acc      | Acc  | Acc  | Acc  | Acc  | Acc  | Acc | 8        |   | 1 | 1 | 1 | 1 | 1 | 1 | A              | S      |            |            |
| <i>Monanthes minima</i> (Bolle) Christ                 | Crassulaceae    | Acc      | NL   | Acc  | Acc  | Acc  | Acc  | NL  | 1        |   |   |   | 1 |   |   |   | T              | S      |            |            |
| <i>Monanthes muralis</i> (Webb ex Bolle) Hook.f.       | Crassulaceae    | Acc      | Acc  | Acc  | AmUn | Acc  | Acc  | Acc | 1        | 1 | 1 |   |   |   |   |   | A              | S      |            |            |
| <i>Monanthes pallens</i> (Webb in Christ) Christ       | Crassulaceae    | Acc      | Acc  | Acc  | Acc  | Acc  | Acc  | Acc | 1        |   |   | 1 | 1 |   |   |   | A              | S      |            |            |
| <i>Monanthes polyphylla</i> (Aiton) Haw.               | Crassulaceae    | Acc      | NL   | Acc  | Acc  | Acc  | Acc  | Acc | 3        |   | 1 |   | 1 |   |   |   | A              | S      |            |            |
| <i>Monanthes polyphylla</i> (Aiton) Haw.               | Crassulaceae    | Acc      | Acc  | NL   | Syn  | Acc  | Acc  | NL  |          |   | 1 |   | 1 |   |   |   | A              | S      |            |            |
| <i>Monanthes purpurascens</i> (Bolle & Webb) Christ    | Crassulaceae    | NL       | NL   | Acc  | AmUn | Acc  | Syn  | NL  | 1        |   |   |   |   | 1 |   |   | C              | S      |            |            |
| <i>Monanthes subcrassicaulis</i> (Kuntze) Praeger      | Crassulaceae    | Syn      | NL   | Acc  | Acc  | Syn  | Syn  | Syn | 0        |   | 1 |   | 1 |   |   |   | A              | S      |            |            |
| <i>Monanthes subrosulata</i> Bañares & A. Acev.-Rodr.  | Crassulaceae    | Acc      | Acc  | Acc  | NL   | Acc  | Acc  | NL  | 0        |   | 1 |   |   |   |   |   | P              | S      |            |            |
| <i>Monanthes wildpretii</i> Banares & S.Scholz         | Crassulaceae    | Acc      | Acc  | Acc  | Acc  | Acc  | Acc  | NL  | 0        |   |   |   | 1 |   |   |   | T              | S      |            |            |
| <i>Montanoa bipinnatifida</i> (Kunth) K.Koch           | Asteraceae      | Acc      | Acc  | Acc  | Acc  | Acc  | Acc  | Acc | 7        |   |   |   | 1 |   |   |   |                |        | S          | O          |

| Species Name                                                      | Family           | Atlantis | Muer | POWO | WFO  | COL | GBIF | TRY | POWO Syn | H | P | G | T | C | F | L | Endemic Status | Native | Non native | Ornam Crop |
|-------------------------------------------------------------------|------------------|----------|------|------|------|-----|------|-----|----------|---|---|---|---|---|---|---|----------------|--------|------------|------------|
| <i>Morella rivas-martinezii</i> A.Santos & J.Herb.                | Myricaceae       | Acc      | Acc  | AmUn | Acc  | Acc | Acc  | Acc | 1        | 1 | 1 | 1 |   |   |   |   | A              | S      |            |            |
| <i>Moricandia arvensis</i> (L.) DC.                               | Brassicaceae     | Acc      | Acc  | Acc  | Acc  | Acc | Acc  | Acc | 11       |   |   |   |   | 1 | 1 |   |                |        | S          |            |
| <i>Morus alba</i> L.                                              | Moraceae         | Acc      | Acc  | Acc  | Acc  | Acc | Acc  | Acc | 40       | 1 | 1 |   |   | 1 |   |   |                |        | S          | C          |
| <i>Morus nigra</i> L.                                             | Moraceae         | Acc      | Acc  | Acc  | Acc  | Acc | Acc  | Acc | 5        | 1 | 1 | 1 | 1 | 1 | 1 | 1 |                |        | S          | C          |
| <i>Musa acuminata</i> Colla                                       | Musaceae         | Acc      | Acc  | Acc  | Acc  | Acc | Acc  | Acc | 0        | 1 | 1 | 1 | 1 | 1 | 1 | 1 |                |        | S          | C          |
| <i>Myoporum laetum</i> G. Forst.                                  | Scrophulariaceae | Acc      | Acc  | Acc  | Acc  | Acc | Acc  | Acc | 2        | 1 |   |   | 1 | 1 |   | 1 |                |        | I          | O          |
| <i>Myoporum tenuifolium</i> G. Forst.                             | Scrophulariaceae | Acc      | Acc  | Acc  | Acc  | Acc | Acc  | Acc | 2        |   |   |   |   | 1 |   |   |                |        | S          | O          |
| <i>Myosotis discolor</i> Pers.                                    | Boraginaceae     | Acc      | NL   | Acc  | Acc  | Acc | Acc  | Acc | 5        | 1 | 1 | 1 | 1 | 1 |   |   |                | S      |            |            |
| <i>Myosotis latifolia</i> Poir.                                   | Boraginaceae     | Acc      | Acc  | Acc  | Acc  | Acc | Acc  | Acc | 1        | 1 | 1 | 1 | 1 | 1 |   |   |                | S      |            |            |
| <i>Myosotis ramosissima</i> Rochel                                | Boraginaceae     | Acc      | Acc  | Acc  | Acc  | Acc | Acc  | Acc | 10       | 1 | 1 |   | 1 | 1 |   |   |                | P      |            |            |
| <i>Myrica faya</i> Aiton                                          | Myricaceae       | Syn      | Syn  | Acc  | Acc  | Syn | Syn  | Acc | 4        | 1 | 1 | 1 | 1 | 1 | 1 | 1 |                | S      |            |            |
| <i>Myriophyllum spicatum</i> L.                                   | Haloragaceae     | Acc      | Acc  | Acc  | Acc  | Acc | Acc  | Acc | 1        | 1 | 1 |   | 1 | 1 |   |   |                |        | S          |            |
| <i>Myriopus candidulus</i> (Miers) Feuillet                       | Boraginaceae     | Syn      | Syn  | Acc  | Syn  | Acc | Acc  | Syn | 2        | 1 | 1 | 1 | 1 | 1 | 1 | 1 | A              | S      |            |            |
| <i>Myrtus communis</i> L.                                         | Myrtaceae        | Acc      | Acc  | Acc  | Acc  | Acc | Acc  | Acc | 0        |   |   | 1 | 1 | 1 |   |   |                |        | S          | O          |
| <i>Najas marina</i> L.                                            | Hydrocharitaceae | Acc      | Acc  | Acc  | Acc  | Acc | Acc  | Acc | 0        |   |   |   |   | 1 | 1 |   |                |        | P          |            |
| <i>Nanorrhinum sagittatum</i> (Poir.) Yousefi & Zarre;            | Plantaginaceae   | Syn      | Syn  | Acc  | Syn  | Acc | Acc  | Syn | 3        |   |   |   | 1 | 1 | 1 | 1 |                | S      |            |            |
| <i>Nanorrhinum scoparium</i> (Brouss. ex Spreng.) Yousefi & Zarre | Plantaginaceae   | Syn      | Syn  | Acc  | Syn  | Acc | Acc  | Syn | 6        |   | 1 | 1 | 1 | 1 |   |   | A              | S      |            |            |
| <i>Nanorrhinum urbanii</i> (Pit.) Yousefi & Zarre                 | Plantaginaceae   | NL       | Syn  | Acc  | Syn  | Acc | Acc  | NL  | 3        |   |   |   | 1 | 1 |   | 1 | A              | S      |            |            |
| <i>Narcissus tazetta</i> L.                                       | Amaryllidaceae   | Acc      | Acc  | Acc  | Acc  | Acc | Acc  | Acc | 5        |   |   |   | 1 | 1 |   |   |                | P      |            | O          |
| <i>Nassella neesiana</i> (Trin. & Rupr.) Barkworth                | Poaceae          | Acc      | Acc  | Acc  | Acc  | Acc | Acc  | Acc | 27       | 1 | 1 | 1 | 1 | 1 | 1 | 1 |                |        | I          |            |
| <i>Nasturtium officinale</i> R.Br.                                | Brassicaceae     | Syn      | Syn  | Acc  | Acc  | Acc | Acc  | Acc | 31       |   | 1 | 1 | 1 | 1 | 1 |   |                |        | S          | C          |
| <i>Neatostema apulum</i> (L.) I.M.Johnst.                         | Boraginaceae     | Acc      | Acc  | Acc  | AmUn | Acc | Acc  | Acc | 7        |   |   | 1 | 1 | 1 | 1 | 1 |                | P      |            |            |
| <i>Nemesia melissifolia</i> Benth.                                | Scrophulariaceae | Acc      | Acc  | Acc  | Acc  | Acc | Acc  | Acc | 0        |   |   |   | 1 |   |   |   |                |        | S          |            |
| <i>Neotinea maculata</i> (Desf.) Stearn                           | Orchidaceae      | Acc      | Acc  | Acc  | Acc  | Acc | Acc  | Acc | 31       | 1 | 1 | 1 | 1 | 1 |   |   |                | P      |            |            |

| Species Name                                | Family           | Atlantis | Muer | POWO | WFO | COL  | GBIF | TRY | POWO Syn | H | P | G | T | C | F | L | Endemic Status | Native | Non native | Ornam Crop |
|---------------------------------------------|------------------|----------|------|------|-----|------|------|-----|----------|---|---|---|---|---|---|---|----------------|--------|------------|------------|
| <i>Nepeta teydea</i> Webb & Berthel.        | Lamiaceae        | Acc      | Acc  | Acc  | Acc | Acc  | Acc  | Acc | 1        |   | 1 |   | 1 |   |   |   | A              | S      |            |            |
| <i>Nephrolepis cordifolia</i> (L.) C.Presl. | Nephrolepidaceae | Acc      | NL   | Acc  | Acc | AmUn | Acc  | Acc | 25       |   | 1 |   | 1 |   |   |   |                |        | S          | O          |
| <i>Nephrolepis exaltata</i> (L.) Schott     | Nephrolepidaceae | Acc      | Acc  | Acc  | Acc | AmUn | Acc  | Acc | 3        |   | 1 |   | 1 | 1 |   |   |                |        | S          | O          |
| <i>Nerium oleander</i> L.                   | Apocynaceae      | NL       | NL   | Acc  | Acc | Acc  | Acc  | Acc | 22       |   | 1 |   | 1 | 1 |   |   |                |        | P          | O          |
| <i>Neurada procumbens</i> L.                | Neuradaceae      | Acc      | Acc  | Acc  | Acc | Acc  | Acc  | Acc | 1        |   |   |   |   | 1 |   |   |                |        | I          |            |
| <i>Nicandra physalodes</i> (L.) Gaertn.     | Solanaceae       | Acc      | Acc  | Acc  | Acc | Acc  | Acc  | Acc | 18       |   | 1 | 1 | 1 | 1 |   | 1 |                |        | S          | O          |
| <i>Nicotiana alata</i> Link & Otto          | Solanaceae       | Acc      | Acc  | Acc  | Acc | Acc  | Acc  | Acc | 7        |   |   |   | 1 |   |   |   |                |        | S          | O          |
| <i>Nicotiana glauca</i> Graham              | Solanaceae       | Acc      | Acc  | Acc  | Acc | Acc  | Acc  | Acc | 8        | 1 | 1 | 1 | 1 | 1 | 1 | 1 |                |        | I          | O          |
| <i>Nicotiana glutinosa</i> L.               | Solanaceae       | Acc      | Acc  | Acc  | Acc | Acc  | Acc  | Acc | 4        |   |   |   | 1 |   |   |   |                |        | S          | O          |
| <i>Nicotiana paniculata</i> L.              | Solanaceae       | Acc      | Acc  | Acc  | Acc | Acc  | Acc  | Acc | 4        |   |   |   | 1 |   |   |   |                |        | I          | O          |
| <i>Nicotiana rustica</i> L.                 | Solanaceae       | Acc      | Acc  | Acc  | Acc | Acc  | Acc  | Acc | 22       |   |   |   | 1 |   |   |   |                |        | S          | C          |
| <i>Nicotiana tabacum</i> L.                 | Solanaceae       | Acc      | Acc  | Acc  | Acc | Acc  | Acc  | Acc | 53       | 1 | 1 | 1 | 1 | 1 | 1 | 1 |                |        | S          | C          |
| <i>Nigella damascena</i> L                  | Ranunculaceae    | Acc      | Acc  | Acc  | Acc | Acc  | Acc  | Acc | 14       |   | 1 | 1 | 1 |   |   |   |                |        | P          | C          |
| <i>Nothoscordum gracile</i> (Aiton) Stearn  | Amaryllidaceae   | Acc      | Acc  | Acc  | Acc | Acc  | Acc  | Acc | 2        | 1 | 1 | 1 | 1 | 1 |   | 1 |                |        | P          | O          |
| <i>Notobasis syriaca</i> (L.) Cass.         | Asteraceae       | Acc      | Acc  | Acc  | Acc | Acc  | Acc  | Acc | 7        |   |   |   |   | 1 |   | 1 |                |        | S          |            |
| <i>Notoceras bicornis</i> (Aiton) Amo       | Brassicaceae     | Acc      | Acc  | Acc  | Acc | Acc  | Acc  | Acc | 2        | 1 | 1 | 1 | 1 | 1 | 1 | 1 |                | P      |            |            |
| <i>Ocimum basilicum</i> L.                  | Lamiaceae        | Acc      | NL   | Acc  | Acc | Acc  | Acc  | Acc | 25       |   | 1 |   | 1 | 1 | 1 | 1 |                |        | S          | C          |
| <i>Ocotea foetens</i> (Aiton) Baill.        | Lauraceae        | Acc      | Acc  | Acc  | Acc | Acc  | Acc  | Acc | 7        | 1 | 1 | 1 | 1 | 1 |   |   |                | S      |            |            |
| <i>Odontites hollianus</i> (Lowe) Benth.    | Orobanchaceae    | NL       | NL   | Acc  | Acc | Acc  | Acc  | Acc | 3        |   | 1 |   |   |   |   |   |                | P      |            |            |
| <i>Oenothera biennis</i> L.                 | Onagraceae       | Acc      | Acc  | Acc  | Acc | Acc  | Acc  | Acc | 119      |   |   |   | 1 |   |   |   |                |        | S          |            |
| <i>Oenothera glazioviana</i> Micheli        | Onagraceae       | Acc      | Acc  | Acc  | Acc | Acc  | Acc  | Acc | 49       |   | 1 |   | 1 |   |   |   |                |        | S          |            |
| <i>Oenothera indecora</i> Cambess.          | Onagraceae       | Acc      | Acc  | Acc  | Acc | Acc  | Acc  | Acc | 5        |   | 1 |   |   |   |   |   |                | P      |            |            |
| <i>Oenothera jamesii</i> Torr. & A. Gray    | Onagraceae       | Acc      | Acc  | Acc  | Acc | Acc  | Acc  | Acc | 3        |   | 1 |   | 1 |   |   |   |                |        | S          |            |
| <i>Oenothera parodiana</i> Munz             | Onagraceae       | Acc      | Acc  | Acc  | Acc | Acc  | Acc  | Acc | 5        |   | 1 |   |   |   |   |   |                |        | S          |            |

| Species Name                                                             | Family       | Atlantis | Muer | POWO | WFO  | COL  | GBIF | TRY | POWO Syn | H | P | G | T | C | F | L | Endemic Status | Native | Non native | Ornam Crop |
|--------------------------------------------------------------------------|--------------|----------|------|------|------|------|------|-----|----------|---|---|---|---|---|---|---|----------------|--------|------------|------------|
| <i>Oenothera rosea</i> L'Her. Ex Aiton                                   | Onagraceae   | Acc      | Acc  | Acc  | Acc  | Acc  | Acc  | Acc | 16       |   | 1 |   | 1 | 1 | 1 | 1 |                |        | S          |            |
| <i>Oenothera stricta</i> Ledeb. ex Link                                  | Onagraceae   | Acc      | Acc  | Acc  | Acc  | Acc  | Acc  | Acc | 17       |   |   |   | 1 |   |   |   |                |        | S          |            |
| <i>Ogastemma pusillum</i> (Coss. & Durieu ex Bonnet & Barratte) Brummitt | Boraginaceae | Acc      | Acc  | Acc  | Acc  | Acc  | Acc  | Acc | 2        |   |   |   |   |   | 1 |   |                | P      |            |            |
| <i>Olea europaea</i> L.                                                  | Oleaceae     | Acc      | Acc  | Acc  | Acc  | Acc  | Acc  | Acc | 2        | 1 | 1 | 1 | 1 | 1 | 1 | 1 |                | P      |            | C          |
| <i>Oligomeris linifolia</i> (Vahl ex Hornem.) J.F.Macbr.                 | Resedaceae   | Acc      | Acc  | Acc  | Acc  | Acc  | Acc  | Acc | 14       |   |   |   | 1 | 1 | 1 | 1 |                | S      |            |            |
| <i>Oloptum miliaceum</i> (L.) Röser & Hamasha                            | Poaceae      | Syn      | Syn  | Acc  | Syn  | Acc  | Syn  | Syn | 29       |   |   | 1 | 1 | 1 |   |   |                | P      |            |            |
| <i>Ononis angustissima</i> Lam.                                          | Fabaceae     | Acc      | NL   | Acc  | Syn  | Syn  | Syn  | Acc | 0        |   |   |   | 1 | 1 | 1 | 1 |                | S      |            |            |
| <i>Ononis catalinae</i> Reyes-Bet. & S.Scholz                            | Fabaceae     | Acc      | Acc  | Acc  | AmUn | AmUn | Acc  | NL  | 0        |   |   |   |   |   | 1 | 1 | A              | S      |            |            |
| <i>Ononis christii</i> Bolle                                             | Fabaceae     | Acc      | Acc  | Acc  | AmUn | AmUn | Acc  | Acc | 0        |   |   |   |   |   | 1 |   | F              | S      |            |            |
| <i>Ononis dentata</i> Sol. ex Lowe                                       | Fabaceae     | Acc      | Acc  | Acc  | Syn  | Syn  | Acc  | Syn | 1        | 1 | 1 | 1 | 1 | 1 |   | 1 |                | P      |            |            |
| <i>Ononis diffusa</i> Ten.                                               | Fabaceae     | Acc      | Acc  | Acc  | Acc  | Acc  | Acc  | Acc | 5        | 1 | 1 | 1 | 1 | 1 | 1 | 1 |                | P      |            |            |
| <i>Ononis hebecarpa</i> Webb & Berthel.                                  | Fabaceae     | Acc      | Acc  | Acc  | AmUn | Acc  | Acc  | Acc | 0        |   |   |   |   |   | 1 | 1 | A              | S      |            |            |
| <i>Ononis hesperia</i> (Maire) H. Förther & D. Podlech                   | Fabaceae     | Acc      | NL   | Syn  | Acc  | Acc  | Syn  | NL  |          |   |   |   | 1 | 1 | 1 | 1 |                | S      |            |            |
| <i>Ononis laxiflora</i> Desf.                                            | Fabaceae     | Acc      | Acc  | Acc  | Acc  | Acc  | Acc  | Acc | 0        |   | 1 |   |   | 1 | 1 | 1 |                | P      |            |            |
| <i>Ononis mitissima</i> L.                                               | Fabaceae     | Acc      | Acc  | Acc  | Acc  | Acc  | Acc  | Acc | 4        | 1 | 1 | 1 | 1 | 1 |   |   |                | P      |            |            |
| <i>Ononis pendula</i> Desf.                                              | Fabaceae     | Acc      | Acc  | Acc  | Acc  | Acc  | Acc  | NL  | 0        |   |   |   |   | 1 | 1 | 1 |                | S      |            |            |
| <i>Ononis reclinata</i> L.                                               | Fabaceae     | Acc      | Acc  | Acc  | Acc  | Acc  | Acc  | Acc | 1        | 1 | 1 | 1 | 1 | 1 | 1 | 1 |                | P      |            |            |
| <i>Ononis serrata</i> Forssk.                                            | Fabaceae     | Acc      | Acc  | Acc  | Acc  | Acc  | Acc  | Acc | 2        | 1 | 1 | 1 | 1 | 1 | 1 | 1 |                | P      |            |            |
| <i>Ononis sicula</i> Guss.                                               | Fabaceae     | Acc      | Acc  | Acc  | Syn  | Acc  | Syn  | Syn | 4        |   |   |   |   |   | 1 | 1 |                | P      |            |            |
| <i>Ononis tournefortii</i> Coss.                                         | Fabaceae     | Acc      | Acc  | Acc  | Acc  | Acc  | Acc  | Acc | 2        | 1 |   | 1 | 1 | 1 | 1 | 1 |                | P      |            |            |
| <i>Ononis variegata</i> L.                                               | Fabaceae     | Acc      | Acc  | Acc  | Acc  | Acc  | Acc  | Acc | 3        |   |   |   |   | 1 |   |   |                | P      |            |            |
| <i>Ononis viscosa</i> L.                                                 | Fabaceae     | Acc      | Acc  | Acc  | Acc  | Acc  | Acc  | Acc | 1        | 1 |   |   |   | 1 | 1 | 1 |                | P      |            |            |
| <i>Onopordum carduelium</i> Bolle                                        | Asteraceae   | Acc      | Acc  | Acc  | Acc  | AmUn | Acc  | NL  | 0        |   |   |   |   | 1 |   |   | C              | S      |            |            |
| <i>Onopordum micropterum</i> Pau                                         | Asteraceae   | Acc      | Acc  | Acc  | Acc  | AmUn | Syn  | Acc | 3        |   |   |   |   |   | 1 |   | F              | S      |            |            |

| Species Name                                       | Family          | Atlantis | Muer | POWO | WFO | COL  | GBIF | TRY | POWO Syn | H | P | G | T | C | F | L | Endemic Status | Native | Non native | Ornam Crop |
|----------------------------------------------------|-----------------|----------|------|------|-----|------|------|-----|----------|---|---|---|---|---|---|---|----------------|--------|------------|------------|
| <i>Ophioglossum azoricum</i> C. Presl              | Ophioglossaceae | Acc      | Acc  | Acc  | Acc | Acc  | Acc  | Acc | 0        | 1 | 1 |   | 1 | 1 | 1 | 1 |                | S      |            |            |
| <i>Ophioglossum lusitanicum</i> L.                 | Ophioglossaceae | Acc      | Acc  | Acc  | Acc | Acc  | Acc  | Acc | 2        | 1 | 1 | 1 | 1 | 1 |   |   |                | S      |            |            |
| <i>Ophioglossum polyphyllum</i> A. Braun ex Schub. | Ophioglossaceae | Acc      | Acc  | Acc  | Acc | Acc  | Acc  | Acc | 9        | 1 | 1 |   | 1 | 1 | 1 | 1 |                | S      |            |            |
| <i>Ophrys bombyliflora</i> Link                    | Orchidaceae     | Acc      | Acc  | Acc  | Acc | Acc  | Acc  | Acc | 1        |   |   |   | 1 | 1 |   |   |                | P      |            |            |
| <i>Oplismenus hirtellus</i> (L.) P.Beauv.          | Poaceae         | Acc      | Acc  | Acc  | Acc | Acc  | Acc  | Acc | 69       |   |   |   | 1 |   |   |   |                |        | S          | O          |
| <i>Opuntia basilaris</i> Engelm. & J.M. Bigelow    | Cactaceae       | Acc      | NL   | Acc  | Acc | Acc  | Acc  | Acc | 21       |   |   |   | 1 |   |   |   |                |        | S          | O          |
| <i>Opuntia dillenii</i> (Ker Gawl.) Haw.           | Cactaceae       | Acc      | Acc  | Acc  | Acc | Syn  | Syn  | Acc | 6        | 1 | 1 | 1 | 1 | 1 | 1 | 1 |                |        | I          | O          |
| <i>Opuntia elatior</i> Mill.                       | Cacactaceae     | NL       | NL   | Acc  | Acc | Acc  | Acc  | Acc | 24       |   |   |   | 1 |   |   |   |                |        | S          | O          |
| <i>Opuntia ficus-indica</i> (L.) Mill.             | Cactaceae       | NL       | Syn  | Acc  | Acc | Acc  | Acc  | Acc | 30       | 1 | 1 | 1 | 1 | 1 | 1 | 1 |                |        | S          | O          |
| <i>Opuntia leucotricha</i> DC.                     | Cactaceae       | Acc      | Acc  | Acc  | Acc | Acc  | Acc  | Acc | 13       |   | 1 |   |   | 1 |   |   |                |        | S          | O          |
| <i>Opuntia macrocentra</i> Engelm.                 | Cactaceae       | Acc      | NL   | Acc  | Acc | Acc  | Acc  | Acc | 3        |   |   |   | 1 |   |   |   |                |        | S          | O          |
| <i>Opuntia maxima</i> Mill.                        | Cactaceae       | Acc      | Acc  | Acc  | Acc | AmUn | Acc  | Acc | 16       | 1 | 1 | 1 | 1 | 1 | 1 | 1 |                |        | S          | O          |
| <i>Opuntia microdasys</i> (Lehm.) Pfeiff.          | Cactaceae       | Acc      | NL   | Acc  | Acc | Acc  | Acc  | Acc | 8        |   |   |   | 1 | 1 | 1 |   |                |        | S          | O          |
| <i>Opuntia monacantha</i> (Willd.) Haw.            | Cactaceae       | Acc      | NL   | Acc  | Acc | Acc  | Acc  | Acc | 12       |   | 1 | 1 | 1 | 1 | 1 | 1 |                |        | S          | O          |
| <i>Opuntia pilifera</i> F.A.C. Weber               | Cactaceae       | Acc      | NL   | Acc  | Acc | Acc  | Acc  | Acc | 1        |   |   |   | 1 | 1 |   |   |                |        | S          | O          |
| <i>Opuntia robusta</i> J.C. Wendl.                 | Cactaceae       | Acc      | Acc  | Acc  | Acc | Acc  | Acc  | Acc | 13       |   | 1 |   | 1 | 1 |   |   |                |        | S          | O          |
| <i>Opuntia tomentosa</i> Salm-Dyck                 | Cactaceae       | Acc      | Acc  | Acc  | Acc | Acc  | Acc  | Acc | 18       | 1 | 1 | 1 | 1 | 1 | 1 | 1 |                |        | I          | O          |
| <i>Opuntia tuna</i> (L.) Mill.                     | Cactaceae       | Acc      | Acc  | Acc  | Acc | Acc  | Acc  | Acc | 3        |   | 1 |   |   | 1 |   |   |                |        | S          | O          |
| <i>Orchis canariensis</i> Lindl.                   | Orchidaceae     | Acc      | Syn  | Acc  | Syn | Syn  | Syn  | NL  | 3        | 1 | 1 | 1 | 1 | 1 |   |   | A              | S      |            |            |
| <i>Orchis mascula</i> (L.) L.                      | Orchidaceae     | Acc      | NL   | Acc  | Acc | Acc  | Acc  | Acc | 2        |   | 1 |   |   |   |   |   |                | S      |            |            |
| <i>Oreocereus pseudofossulatus</i> D.R.Hunt        | Cacactaceae     | Acc      | NL   | Acc  | Syn | Acc  | Acc  | Syn | 1        |   |   |   | 1 |   |   |   |                |        | S          | O          |
| <i>Origanum vulgare</i> L.                         | Lamiaceae       | Acc      | Acc  | Acc  | Acc | Acc  | Acc  | Acc | 2        | 1 | 1 | 1 | 1 | 1 |   |   |                | P      |            | C          |
| <i>Ornithogalum arabicum</i> L.                    | Asparagaceae    | Syn      | Syn  | Acc  | Acc | Acc  | Acc  | Acc | 16       |   |   |   | 1 |   |   |   |                |        | P          |            |
| <i>Ornithogalum narbonense</i> L.                  | Asparagaceae    | Syn      | Syn  | Acc  | Acc | Acc  | Acc  | Acc | 14       |   |   | 1 | 1 | 1 | 1 | 1 |                |        | P          |            |



| Species Name                                             | Family        | Atlantis | Muer | POWO | WFO  | COL  | GBIF | TRY | POWO Syn | H | P | G | T | C | F | L | Endemic Status | Native | Non native | Ornam Crop |
|----------------------------------------------------------|---------------|----------|------|------|------|------|------|-----|----------|---|---|---|---|---|---|---|----------------|--------|------------|------------|
| <i>Ornithogalum pyrenaicum</i> L.                        | Asparagaceae  | Syn      | Syn  | Acc  | Acc  | Acc  | Acc  | Acc | 14       |   |   |   |   | 1 |   |   |                |        | P          |            |
| <i>Ornithopus compressus</i> L.                          | Fabaceae      | Acc      | Acc  | Acc  | AmUn | Acc  | Acc  | Acc | 5        | 1 | 1 | 1 | 1 | 1 | 1 |   |                | P      |            |            |
| <i>Ornithopus perpusillus</i> L.                         | Fabaceae      | Acc      | Acc  | Acc  | Acc  | Acc  | Acc  | Acc | 12       |   |   |   | 1 |   | 1 | 1 |                |        | S          |            |
| <i>Ornithopus pinnatus</i> (Mill.) Druce                 | Fabaceae      | Acc      | Acc  | Acc  | Acc  | Acc  | Acc  | Acc | 14       | 1 | 1 |   | 1 |   |   |   |                |        | P          |            |
| <i>Orobanche amethystea</i> Thuill.                      | Orobanchaceae | Acc      | Syn  | Acc  | Acc  | Acc  | Acc  | Acc | 10       |   |   |   | 1 |   |   | 1 |                | P      |            |            |
| <i>Orobanche artemisiae-campestris</i> Vaucher ex Gaudin | Orobanchaceae | Syn      | NL   | Acc  | Acc  | Acc  | Acc  | Acc | 10       |   |   |   |   |   | 1 | 1 |                | P      |            |            |
| <i>Orobanche calendulae</i> Pomel                        | Orobanchaceae | Acc      | Acc  | Acc  | Acc  | Acc  | Acc  | Acc | 2        |   |   |   |   |   |   | 1 |                | P      |            |            |
| <i>Orobanche cernua</i> Loeffl.                          | Orobanchaceae | Acc      | Syn  | Acc  | Acc  | Acc  | Acc  | Acc | 20       | 1 |   | 1 | 1 | 1 | 1 | 1 | A              | P      |            |            |
| <i>Orobanche crenata</i> Forssk.                         | Orobanchaceae | Acc      | Acc  | Acc  | Acc  | Acc  | Acc  | Acc | 16       | 1 |   |   | 1 | 1 |   | 1 |                | P      |            |            |
| <i>Orobanche gratiosa</i> (Webb & Berthel.) Linding.     | Orobanchaceae | Syn      | Acc  | Acc  | AmUn | AmUn | Syn  | NL  | 2        |   |   |   |   | 1 | 1 | 1 | A              | S      |            |            |
| <i>Orobanche hederæ</i> Duby                             | Orobanchaceae | Acc      | Acc  | Acc  | Acc  | Acc  | Acc  | Acc | 14       |   | 1 | 1 | 1 |   |   |   |                | P      |            |            |
| <i>Orobanche lavandulacea</i> (Rchb.) Pomel              | Orobanchaceae | Syn      | NL   | Acc  | Acc  | Syn  | Acc  | Acc | 7        |   |   |   | 1 | 1 |   |   |                | P      |            |            |
| <i>Orobanche minor</i> Sm.                               | Orobanchaceae | Acc      | Acc  | Acc  | Acc  | Acc  | Acc  | Acc | 33       | 1 | 1 |   |   | 1 | 1 | 1 |                | P      |            |            |
| <i>Orobanche mutelii</i> F.W.Schultz                     | Orobanchaceae | Syn      | Acc  | Acc  | Acc  | Syn  | Syn  | Acc | 22       | 1 |   | 1 | 1 | 1 | 1 | 1 |                | P      |            |            |
| <i>Orobanche nana</i> Noe ex Rchb.                       | Orobanchaceae | Syn      | Acc  | Acc  | Acc  | Syn  | Syn  | Acc | 10       | 1 | 1 |   | 1 | 1 | 1 |   |                | P      |            |            |
| <i>Orobanche purpurea</i> Jacq.                          | Orobanchaceae | Syn      | Acc  | Acc  | Acc  | Syn  | Acc  | Acc | 18       | 1 | 1 | 1 | 1 | 1 |   | 1 |                | P      |            |            |
| <i>Orobanche ramosa</i> L.                               | Orobanchaceae | Syn      | Acc  | Acc  | Acc  | Syn  | Acc  | Acc | 16       | 1 | 1 | 1 | 1 | 1 | 1 | 1 |                | P      |            |            |
| <i>Orobanche schultzei</i> Mutel                         | Orobanchaceae | Syn      | Acc  | Acc  | Acc  | Syn  | Syn  | Acc | 11       |   |   |   |   | 1 |   |   |                | P      |            |            |
| <i>Orobanche trichocalyx</i> (Webb & Berthel.) Beck      | Orobanchaceae | NL       | Acc  | NL   | Acc  | Syn  | Syn  | NL  |          |   |   |   | 1 | 1 |   |   | A              | S      |            |            |
| <i>Orobanche variegata</i> Wallr.                        | Orobanchaceae | NL       | NL   | Acc  | Acc  | Acc  | Acc  | Acc | 13       | 1 | 1 | 1 | 1 | 1 |   | 1 |                | P      |            |            |
| <i>Oropetium capense</i> Stapf                           | Poaceae       | Acc      | NL   | Acc  | Acc  | Acc  | Acc  | Acc | 8        |   |   |   |   | 1 |   |   | C              | S      |            |            |
| <i>Oryza sativa</i> L.                                   | Poaceae       | Acc      | Acc  | Acc  | Acc  | Acc  | Acc  | Acc | 21       |   |   |   | 1 |   |   |   |                |        | S          | C          |
| <i>Osiris lanceolata</i> Hochst. & Steud.                | Santalaceae   | Acc      | Acc  | Acc  | Acc  | Syn  | Acc  | Acc | 21       |   | 1 | 1 | 1 |   |   |   |                | S      |            |            |
| <i>Oxalis adenophylla</i> Gillies ex Hook. & Arn.        | Oxalidaceae   | NL       | NL   | Acc  | Acc  | Acc  | Acc  | Acc | 3        |   | 1 |   |   |   |   |   |                |        | S          |            |

| Species Name                                           | Family         | Atlantis | Muer | POWO | WFO | COL  | GBIF | TRY | POWO Syn | H | P | G | T | C | F | L | Endemic Status | Native | Non native | Ornam Crop |
|--------------------------------------------------------|----------------|----------|------|------|-----|------|------|-----|----------|---|---|---|---|---|---|---|----------------|--------|------------|------------|
| <i>Oxalis bowiei</i> W.T.Aiton ex G.Don                | Oxalidaceae    | Acc      | NL   | Acc  | Acc | Acc  | Acc  | Acc | 4        |   |   |   |   | 1 |   |   |                |        | P          |            |
| <i>Oxalis corniculata</i> L.                           | Oxalidaceae    | Acc      | Syn  | Acc  | Acc | Acc  | Acc  | Acc | 64       | 1 | 1 | 1 | 1 | 1 | 1 | 1 |                | P      |            |            |
| <i>Oxalis debilis</i> Kunth                            | Oxalidaceae    | Acc      | Syn  | Acc  | Acc | Acc  | Acc  | Acc | 20       |   | 1 | 1 | 1 | 1 |   |   |                |        | S          |            |
| <i>Oxalis latifolia</i> Kunth                          | Oxalidaceae    | Acc      | Acc  | Acc  | Acc | Acc  | Acc  | Acc | 25       |   | 1 |   | 1 | 1 | 1 |   |                |        | I          |            |
| <i>Oxalis pes-caprae</i> L.                            | Oxalidaceae    | Acc      | Acc  | Acc  | Acc | Acc  | Acc  | Acc | 20       | 1 | 1 | 1 | 1 | 1 | 1 | 1 |                |        | I          |            |
| <i>Oxalis purpurea</i> L.                              | Oxalidaceae    | Acc      | Acc  | Acc  | Acc | Acc  | Acc  | Acc | 24       |   |   | 1 | 1 | 1 | 1 | 1 |                |        | S          |            |
| <i>Oxalis stricta</i> L.                               | Oxalidaceae    | Acc      | Acc  | Acc  | Acc | Syn  | Syn  | Acc | 67       |   |   |   |   | 1 |   |   |                |        | S          |            |
| <i>Oxybasis glauca</i> (L.) S.Fuentes, Uotila & Borsch | Chenopodiaceae | Acc      | Acc  | Acc  | Syn | Acc  | Acc  | Acc | 18       |   |   |   |   | 1 | 1 |   |                | P      |            |            |
| <i>Oxybasis urbana</i> (L.) S.Fuentes, Uotila & Borsch | Chenopodiaceae | Acc      | Acc  | Acc  | Syn | Acc  | Acc  | Acc | 10       |   |   |   | 1 | 1 |   |   |                | P      |            |            |
| <i>Pallenis hierochuntica</i> (Michon) Greuter         | Asteraceae     | Acc      | Acc  | Acc  | Acc | Acc  | Acc  | Acc | 5        |   |   |   |   |   | 1 |   |                | S      |            |            |
| <i>Pallenis maritima</i> (L.) Greuter                  | Asteraceae     | Acc      | Acc  | Acc  | Acc | Acc  | Acc  | Acc | 6        |   |   |   |   | 1 |   | 1 |                | P      |            |            |
| <i>Pallenis spinosa</i> (L.) Cass.                     | Asteraceae     | Acc      | NL   | Acc  | Acc | Acc  | Acc  | Acc | 6        |   | 1 | 1 | 1 | 1 | 1 | 1 |                | P      |            |            |
| <i>Pancratium canariense</i> Ker Gawl.                 | Amaryllidaceae | Acc      | Acc  | Acc  | Acc | Acc  | Acc  | Acc | 1        | 1 | 1 | 1 | 1 | 1 | 1 | 1 | A              | S      |            |            |
| <i>Pancratium maritimum</i> L.                         | Amaryllidaceae | Acc      | Acc  | Acc  | Acc | Acc  | Acc  | Acc | 13       |   |   |   |   |   | 1 | 1 |                | P      |            | O          |
| <i>Panicum capillare</i> L.                            | Poaceae        | Acc      | Acc  | Acc  | Acc | Acc  | Acc  | Acc | 13       |   |   |   | 1 |   |   |   |                |        | S          |            |
| <i>Panicum miliaceum</i> L.                            | Poaceae        | Acc      | Acc  | Acc  | Acc | Acc  | Acc  | Acc | 23       |   | 1 |   |   |   | 1 | 1 |                |        | S          | C          |
| <i>Panicum repens</i> L.                               | Poaceae        | Acc      | Acc  | Acc  | Acc | Acc  | Acc  | Acc | 13       |   |   | 1 | 1 | 1 |   |   |                | P      |            |            |
| <i>Papaver argemone</i> L.                             | Papaveraceae   | Acc      | Syn  | Acc  | Acc | Acc  | Acc  | Acc | 13       |   |   |   |   |   | 1 | 1 |                | P      |            |            |
| <i>Papaver dodecandrum</i> (Forssk.) Medik.            | Papaveraceae   | NL       | NL   | Acc  | Acc | AmUn | Syn  | Syn | 28       | 1 | 1 | 1 | 1 | 1 | 1 | 1 |                | P      |            |            |
| <i>Papaver dubium</i> L.                               | Papaveraceae   | Acc      | Acc  | Acc  | Acc | Acc  | Acc  | Acc | 32       | 1 | 1 | 1 | 1 | 1 | 1 | 1 |                | P      |            |            |
| <i>Papaver pinnatifidum</i> Moris                      | Papaveraceae   | Acc      | Acc  | Acc  | Acc | Acc  | Acc  | Acc | 2        | 1 | 1 | 1 | 1 | 1 | 1 | 1 |                | P      |            |            |
| <i>Papaver rhoeas</i> L.                               | Papaveraceae   | Acc      | Acc  | Acc  | Acc | Acc  | Acc  | Acc | 59       | 1 | 1 | 1 | 1 | 1 | 1 | 1 |                | P      |            |            |
| <i>Papaver somniferum</i> L.                           | Papaveraceae   | Acc      | Acc  | Acc  | Acc | Acc  | Acc  | Acc | 26       | 1 | 1 | 1 | 1 | 1 | 1 | 1 |                | P      |            | O          |
| <i>Parapholis incurva</i> (L.) C.E.Hubb.               | Poaceae        | Acc      | Acc  | Acc  | Acc | Acc  | Acc  | Acc | 15       |   |   |   |   |   | 1 | 1 |                | P      |            |            |

| Species Name                                                 | Family          | Atlantis | Muer | POWO | WFO  | COL  | GBIF | TRY | POWO Syn | H | P | G | T | C | F | L | Endemic Status | Native | Non native | Ornam Crop |
|--------------------------------------------------------------|-----------------|----------|------|------|------|------|------|-----|----------|---|---|---|---|---|---|---|----------------|--------|------------|------------|
| <i>Parapholis pycnantha</i> (Hack.) C. E. Hubb.              | Poaceae         | Acc      | Acc  | Acc  | Acc  | Acc  | Acc  | Acc | 0        |   |   |   |   | 1 | 1 |   |                | P      |            |            |
| <i>Paraserianthes lophantha</i> (Willd.) I.C.Nielsen         | Fabaceae        | Acc      | Acc  | Acc  | Acc  | Acc  | Acc  | Acc | 6        |   | 1 | 1 | 1 | 1 | 1 |   |                |        | I          |            |
| <i>Parentucellia latifolia</i> (L.) Caruel                   | Orobanchaceae   | Acc      | Syn  | Acc  | AmUn | Acc  | Acc  | Acc | 18       |   |   |   | 1 | 1 |   |   |                |        | P          |            |
| <i>Parentucellia viscosa</i> (L.) Caruel                     | Orobanchaceae   | Acc      | Syn  | Acc  | Acc  | Syn  | Syn  | Acc | 11       | 1 | 1 | 1 | 1 | 1 |   |   |                | P      |            |            |
| <i>Parietaria debilis</i> G.Forst.                           | Urticaceae      | Acc      | Acc  | Acc  | Acc  | Acc  | Acc  | Acc | 32       | 1 | 1 | 1 | 1 | 1 | 1 | 1 |                | P      |            |            |
| <i>Parietaria filamentosa</i> Webb & Bertel.                 | Urticaceae      | Acc      | Acc  | Acc  | AmUn | Acc  | Acc  | NL  | 1        |   | 1 | 1 | 1 |   |   |   | A              | S      |            |            |
| <i>Parietaria judaica</i> L.                                 | Urticaceae      | Acc      | Acc  | Acc  | Acc  | Acc  | Acc  | Acc | 12       | 1 | 1 | 1 | 1 | 1 | 1 | 1 |                | P      |            |            |
| <i>Parietaria mauritanica</i> Durieu                         | Urticaceae      | Acc      | Acc  | Acc  | Acc  | Acc  | Acc  | Acc | 5        | 1 |   |   | 1 |   |   | 1 |                | P      |            |            |
| <i>Parkinsonia aculeata</i> L.                               | Fabaceae        | Acc      | Acc  | Acc  | Acc  | Acc  | Acc  | Acc | 3        |   |   |   | 1 | 1 | 1 |   |                |        | S          | O          |
| <i>Parolinia aridanae</i> A. Santos                          | Brassicaceae    | NL       | Acc  | NL   | NL   | AmUn | Acc  | NL  |          |   | 1 |   |   |   |   |   | P              | S      |            |            |
| <i>Parolinia filifolia</i> Kunk.                             | Brassicaceae    | Acc      | Acc  | Acc  | Acc  | Acc  | Acc  | NL  | 0        |   |   |   |   | 1 |   |   | C              | S      |            |            |
| <i>Parolinia glabriuscula</i> Montelongo & Bramwell          | Brassicaceae    | Acc      | Acc  | Acc  | AmUn | AmUn | Acc  | NL  | 0        |   |   |   |   | 1 |   |   | C              | S      |            |            |
| <i>Parolinia intermedia</i> Svent. & Bramwell                | Brassicaceae    | Acc      | Acc  | Acc  | Acc  | Acc  | Acc  | Acc | 0        |   |   |   | 1 |   |   |   | T              | S      |            |            |
| <i>Parolinia ornata</i> Webb                                 | Brassicaceae    | Acc      | Acc  | Acc  | Acc  | Acc  | Acc  | Acc | 0        |   |   |   |   | 1 |   |   | C              | S      |            |            |
| <i>Parolinia platypetala</i> G. Kunkel                       | Brassicaceae    | Acc      | Acc  | Acc  | Acc  | Acc  | Acc  | NL  | 0        |   |   |   |   | 1 |   |   | C              | S      |            |            |
| <i>Parolinia schizogynoides</i> Svent.                       | Brassicaceae    | Acc      | Acc  | Acc  | Acc  | Acc  | Acc  | Acc | 0        |   |   | 1 |   |   |   |   | G              | S      |            |            |
| <i>Paronychia argentea</i> Lam.                              | Caryophyllaceae | Acc      | Acc  | Acc  | Acc  | Acc  | Acc  | Acc | 14       | 1 |   |   |   | 1 |   |   |                | P      |            |            |
| <i>Paronychia canariensis</i> (L.f.) Link                    | Caryophyllaceae | Acc      | Acc  | Acc  | Acc  | Acc  | Acc  | Acc | 7        | 1 | 1 | 1 | 1 | 1 |   |   | A              | S      |            |            |
| <i>Paronychia capitata</i> (L.) Lam.                         | Caryophyllaceae | Acc      | NL   | Acc  | Acc  | Acc  | Acc  | Acc | 14       |   |   |   |   | 1 |   |   | C              | S      |            |            |
| <i>Paronychia echinulata</i> Chater                          | Caryophyllaceae | Acc      | Acc  | Acc  | Acc  | Acc  | Acc  | Acc | 2        |   | 1 |   |   | 1 |   |   |                | P      |            |            |
| <i>Parthenocissus tricuspidata</i> (Siebold & Zucc.) Planch. | Vitaceae        | Acc      | Acc  | Acc  | Acc  | Acc  | Acc  | Acc | 18       |   |   |   |   | 1 |   |   |                |        | S          | O          |
| <i>Pascalina glauca</i> Ortega                               | Asteraceae      | NL       | NL   | Acc  | Acc  | Acc  | Acc  | NL  | 10       |   | 1 |   |   |   |   |   |                |        | S          |            |
| <i>Paspalum dilatatum</i> Poir.                              | Poaceae         | Acc      | Acc  | Acc  | Acc  | Acc  | Acc  | Acc | 14       |   | 1 |   | 1 |   |   |   |                |        | S          |            |
| <i>Paspalum distichum</i> L.                                 | Poaceae         | Acc      | Acc  | Acc  | Acc  | Acc  | Acc  | Acc | 29       |   | 1 | 1 | 1 | 1 |   |   |                |        | S          |            |

| Species Name                                                                | Family         | Atlantis | Muer | POWO | WFO | COL | GBIF | TRY | POWO Syn | H | P | G | T | C | F | L | Endemic Status | Native | Non native | Ornam Crop |
|-----------------------------------------------------------------------------|----------------|----------|------|------|-----|-----|------|-----|----------|---|---|---|---|---|---|---|----------------|--------|------------|------------|
| <i>Paspalum notatum</i> Flügge                                              | Poaceae        | Acc      | NL   | Acc  | Acc | Acc | Acc  | Acc | 6        |   |   |   | 1 |   |   |   |                |        | S          |            |
| <i>Paspalum urvillei</i> Steud.                                             | Poaceae        | Acc      | Acc  | Acc  | Acc | Acc | Acc  | Acc | 6        |   | 1 |   |   |   |   |   |                |        | S          |            |
| <i>Paspalum vaginatum</i> Sw.                                               | Poaceae        | Acc      | NL   | Acc  | Acc | Acc | Acc  | Acc | 27       |   | 1 |   | 1 | 1 |   |   |                |        | I          |            |
| <i>Passiflora caerulea</i> L.                                               | Passifloraceae | NL       | NL   | Acc  | Acc | Acc | Acc  | Acc | 12       |   | 1 |   | 1 |   |   |   |                |        | S          | O          |
| <i>Passiflora edulis</i> Sims                                               | Passifloraceae | NL       | Acc  | Acc  | Acc | Acc | Acc  | Acc | 14       |   | 1 |   |   | 1 |   |   |                |        | S          | O          |
| <i>Passiflora mollissima</i> (Kunth) L. H. Bailey                           | Passifloraceae | Acc      | Acc  | Acc  | Acc | Acc | Acc  | Acc | 5        |   | 1 |   |   |   |   |   |                |        | S          | O          |
| <i>Passiflora morifolia</i> Mast.                                           | Passifloraceae | Acc      | NL   | Acc  | Acc | Acc | Acc  | Acc | 5        |   |   |   | 1 | 1 |   |   |                |        | S          | O          |
| <i>Passiflora suberosa</i> L.                                               | Passifloraceae | Acc      | Acc  | Acc  | Acc | Acc | Acc  | Acc | 32       |   | 1 |   |   | 1 |   |   |                |        | S          | O          |
| <i>Patellifolia procumbens</i> (C.Sm.) A.J.Scott, Ford-Lloyd & J.T.Williams | Amaranthaceae  | Acc      | Acc  | Acc  | Acc | Syn | Syn  | Acc | 16       | 1 | 1 | 1 | 1 | 1 | 1 | 1 |                | S      |            |            |
| <i>Pavonia sepioides</i> Fryxell & Krapov.                                  | Malvaceae      | NL       | NL   | Acc  | Acc | Acc | Acc  | Acc | 0        |   |   |   | 1 |   |   |   |                |        | S          | O          |
| <i>Pelargonium capitatum</i> (L.) L'Her.                                    | Geraniaceae    | Acc      | Acc  | Acc  | Acc | Acc | Acc  | Acc | 5        |   | 1 |   |   |   |   | 1 |                |        | I          | O          |
| <i>Pelargonium cuccullatum</i> (L.) L'Hér.                                  | Geraniaceae    | Acc      | NL   | Acc  | Acc | Acc | Acc  | Syn | 16       |   | 1 |   |   |   |   |   |                |        | S          | O          |
| <i>Pelargonium graveolens</i> L'Her.                                        | Geraniaceae    | Acc      | Acc  | Acc  | Acc | Acc | Acc  | Acc | 8        | 1 |   | 1 | 1 | 1 |   |   |                |        | S          | O          |
| <i>Pelargonium inquinans</i> (L.) L'Her.                                    | Geraniaceae    | Acc      | Acc  | Acc  | Acc | Acc | Acc  | Acc | 9        |   | 1 |   | 1 | 1 |   | 1 |                |        | I          | O          |
| <i>Pelargonium peltatum</i> (L.) L'Her.                                     | Geraniaceae    | Acc      | Acc  | Acc  | Acc | Acc | Acc  | Acc | 10       |   |   |   | 1 | 1 |   |   |                |        | S          | O          |
| <i>Pelargonium quercifolium</i> (L. f.) L'Her.                              | Geraniaceae    | Acc      | Acc  | Acc  | Acc | Acc | Acc  | Acc | 6        |   |   | 1 | 1 |   |   |   |                |        | S          | O          |
| <i>Pelargonium zonale</i> (L.) L'Her. ex Aiton                              | Geraniaceae    | Acc      | Acc  | Acc  | Acc | Acc | Acc  | Acc | 34       |   |   |   | 1 | 1 |   |   |                |        | I          | O          |
| <i>Pericallis appendiculata</i> (L.f.) B.Nord.                              | Asteraceae     | Acc      | NL   | Acc  | Acc | Acc | Acc  | Acc | 11       |   | 1 | 1 | 1 |   |   |   | A              | S      |            |            |
| <i>Pericallis cruenta</i> Webb & Berthel.                                   | Asteraceae     | Acc      | Acc  | Acc  | Acc | Acc | Acc  | Acc | 7        | 1 |   | 1 | 1 | 1 |   |   | A              | S      |            |            |
| <i>Pericallis echinata</i> (L.f.) B.Nord.                                   | Asteraceae     | Acc      | Acc  | Acc  | Acc | Acc | Acc  | Acc | 4        |   |   |   | 1 |   |   |   | T              | S      |            |            |
| <i>Pericallis hadrosoma</i> (Svent.) B.Nord.                                | Asteraceae     | Acc      | Acc  | Acc  | Acc | Acc | Acc  | NL  | 1        |   |   |   |   | 1 |   |   | C              | S      |            |            |
| <i>Pericallis hansenii</i> (G.Kunkel) Sunding                               | Asteraceae     | Acc      | Acc  | Acc  | Acc | Acc | Acc  | NL  | 1        |   |   | 1 |   |   |   |   | G              | S      |            |            |

| Species Name                                                                                                                                      | Family          | Atlantis | Muer | POWO | WFO | COL | GBIF | TRY | POWO Syn | H | P | G | T | C | F | L | Endemic Status | Native | Non native | Ornam Crop |
|---------------------------------------------------------------------------------------------------------------------------------------------------|-----------------|----------|------|------|-----|-----|------|-----|----------|---|---|---|---|---|---|---|----------------|--------|------------|------------|
| <i>Pericallis hillebrandii</i> (Christ) Barquín & Voggenreiter ex Beierkuhnlein, Walentowitz & Welss; Basionym <i>Senecio hillebrandii</i> Christ | Asteraceae      | NL       | NL   | Syn  | Syn | Syn | Acc  | NL  |          |   | 1 |   |   |   |   |   | P              | S      |            |            |
| <i>Pericallis lanata</i> (L'Hér) B.Nord.                                                                                                          | Asteraceae      | Acc      | Acc  | Acc  | Acc | Acc | Acc  | Acc | 3        |   |   |   | 1 |   |   |   | T              | S      |            |            |
| <i>Pericallis multiflora</i> (L'Hér) B.Nord.                                                                                                      | Asteraceae      | Acc      | Acc  | Acc  | Acc | Acc | Acc  | Acc | 7        |   |   |   | 1 |   |   |   | T              | S      |            |            |
| <i>Pericallis murrayi</i> (Bornm.) B.Nord.                                                                                                        | Asteraceae      | Acc      | Acc  | Acc  | Acc | Acc | Acc  | Acc | 1        | 1 |   |   |   |   |   |   | H              | S      |            |            |
| <i>Pericallis papyracea</i> (DC.) B.Nord.                                                                                                         | Asteraceae      | Acc      | Acc  | Acc  | Acc | Acc | Acc  | Acc | 6        |   | 1 |   |   |   |   |   | P              | S      |            |            |
| <i>Pericallis steetzii</i> (Bolle) B.Nord.                                                                                                        | Asteraceae      | Acc      | Acc  | Acc  | Acc | Acc | Acc  | Acc | 1        |   |   | 1 |   |   |   |   | G              | S      |            |            |
| <i>Pericallis tussilaginis</i> (L'Hér.) D.Don.                                                                                                    | Asteraceae      | Acc      | Acc  | Acc  | Acc | Acc | Acc  | Acc | 5        |   |   |   | 1 | 1 |   |   | A              | S      |            |            |
| <i>Pericallis webbii</i> (Sch.Bip.) Bolle                                                                                                         | Asteraceae      | Acc      | Acc  | Acc  | Acc | Acc | Acc  | Acc | 2        |   |   |   |   | 1 |   |   | C              | S      |            |            |
| <i>Periploca laevigata</i> Aiton                                                                                                                  | Apocynaceae     | Acc      | Acc  | Acc  | Acc | Acc | Acc  | Acc | 5        | 1 | 1 | 1 | 1 | 1 | 1 | 1 |                | S      |            |            |
| <i>Persea americana</i> Mill.                                                                                                                     | Lauraceae       | NL       | NL   | Acc  | Acc | Acc | Acc  | Acc | 29       |   | 1 | 1 | 1 |   |   |   |                |        | S          | C          |
| <i>Persea barbuja</i> (Cav.) Mabb. & Nieto                                                                                                        | Lauraceae       | Syn      | NL   | Acc  | Syn | Syn | Syn  | Syn | 13       | 1 | 1 | 1 | 1 | 1 | 1 |   |                | S      |            |            |
| <i>Persea indica</i> (L.) Spreng.                                                                                                                 | Lauraceae       | Acc      | Acc  | Acc  | Acc | Syn | Syn  | Acc | 9        | 1 | 1 | 1 | 1 | 1 |   |   |                | S      |            |            |
| <i>Persicaria capitata</i> (Buch.-Ham. ex D.Don) H.Gross                                                                                          | Polygonaceae    | Acc      | Acc  | Acc  | Acc | Acc | Acc  | Acc | 5        |   | 1 | 1 | 1 | 1 |   |   |                |        | S          |            |
| <i>Persicaria decipiens</i> (R.Br.) K.L.Wilson                                                                                                    | Polygonaceae    | Syn      | Syn  | Acc  | Acc | Acc | Acc  | Acc | 27       |   |   | 1 | 1 | 1 |   |   |                | P      |            |            |
| <i>Persicaria maculosa</i> Gray                                                                                                                   | Polygonaceae    | Acc      | Acc  | Acc  | Acc | Acc | Acc  | Acc | 68       |   | 1 |   | 1 | 1 |   |   |                | P      |            |            |
| <i>Petrea volubilis</i> L.                                                                                                                        | Verbenaceae     | NL       | NL   | Acc  | Acc | Acc | Acc  | Acc | 34       |   | 1 |   | 1 |   |   |   |                |        | S          | O          |
| <i>Petrorhagia dubia</i> (Raf.) G.López & Romo                                                                                                    | Caryophyllaceae | Acc      | Acc  | Acc  | Acc | Acc | Acc  | Acc | 11       |   |   |   |   | 1 |   |   |                | P      |            |            |
| <i>Petrorhagia nanteuillii</i> (Burnat) P.W.Ball & Heywood                                                                                        | Caryophyllaceae | Acc      | Acc  | Acc  | Acc | Acc | Acc  | Acc | 4        | 1 | 1 | 1 | 1 | 1 |   | 1 |                | P      |            |            |
| <i>Petroselinum crispum</i> (Mill.) Fuss.                                                                                                         | Apiaceae        | Acc      | Acc  | Acc  | Acc | Acc | Acc  | Acc | 61       | 1 | 1 | 1 | 1 | 1 | 1 | 1 |                |        | S          | C          |
| <i>Petunia axillaris</i> (Lam.) Britton, Sterns & Poggenb.                                                                                        | Solanaceae      | Acc      | NL   | Acc  | Acc | Acc | Acc  | Acc | 8        |   |   |   | 1 |   |   | 1 |                |        | S          | O          |
| <i>Phacelia tanacetifolia</i> Benth.                                                                                                              | Boraginaceae    | NL       | NL   | Acc  | Acc | Acc | Acc  | Acc | 8        |   | 1 |   |   | 1 | 1 |   |                |        | S          | C          |
| <i>Phagnalon purpurascens</i> Sch.Bip.                                                                                                            | Asteraceae      | Acc      | Acc  | Acc  | Acc | Acc | Acc  | Acc | 0        | 1 | 1 | 1 | 1 | 1 | 1 | 1 |                | P      |            |            |
| <i>Phagnalon rupestre</i> (L.) DC.                                                                                                                | Asteraceae      | Acc      | Acc  | Acc  | Acc | Acc | Acc  | Acc | 2        | 1 | 1 | 1 | 1 | 1 | 1 | 1 |                | P      |            |            |

| Species Name                                       | Family           | Atlantis | Muer | POWO | WFO | COL | GBIF | TRY | POWO Syn | H | P | G | T | C | F | L | Endemic Status | Native | Non native | Ornam Crop |
|----------------------------------------------------|------------------|----------|------|------|-----|-----|------|-----|----------|---|---|---|---|---|---|---|----------------|--------|------------|------------|
| <i>Phagnalon saxatile</i> (L.) Cass.               | Asteraceae       | Acc      | Acc  | Acc  | Acc | Acc | Acc  | Acc | 4        | 1 | 1 | 1 | 1 | 1 | 1 | 1 |                | P      |            |            |
| <i>Phagnalon umbelliforme</i> DC.                  | Asteraceae       | Acc      | Acc  | Acc  | Acc | Acc | Acc  | Acc | 0        | 1 | 1 | 1 | 1 | 1 |   |   | A              | S      |            |            |
| <i>Phalaris aquatica</i> L.                        | Poaceae          | Acc      | Acc  | Acc  | Acc | Acc | Acc  | Acc | 10       | 1 | 1 |   | 1 | 1 |   |   |                | P      |            |            |
| <i>Phalaris brachystachys</i> Link                 | Poaceae          | Acc      | Acc  | Acc  | Acc | Acc | Acc  | Acc | 3        | 1 |   | 1 | 1 | 1 | 1 | 1 |                | P      |            |            |
| <i>Phalaris canariensis</i> L.                     | Poaceae          | Acc      | Acc  | Acc  | Acc | Acc | Acc  | Acc | 3        | 1 | 1 | 1 | 1 | 1 | 1 | 1 |                | S      |            |            |
| <i>Phalaris coerulescens</i> Desf.                 | Poaceae          | Acc      | Acc  | Acc  | Acc | Acc | Acc  | Acc | 6        | 1 | 1 | 1 | 1 | 1 | 1 | 1 |                | P      |            |            |
| <i>Phalaris minor</i> Retz.                        | Poaceae          | Acc      | Acc  | Acc  | Acc | Acc | Acc  | Acc | 7        |   | 1 | 1 | 1 | 1 | 1 | 1 |                | P      |            |            |
| <i>Phalaris paradoxa</i> L.                        | Poaceae          | Acc      | Acc  | Acc  | Acc | Acc | Acc  | Acc | 8        |   | 1 | 1 | 1 | 1 | 1 | 1 |                | P      |            |            |
| <i>Phaseolus acutifolius</i> A. Gray               | Fabaceae         | Acc      | NL   | Acc  | Acc | Acc | Acc  | Acc | 0        |   |   |   |   | 1 |   |   |                |        | S          | C          |
| <i>Phaseolus vulgaris</i> L.                       | Fabaceae         | Acc      | Acc  | Acc  | Acc | Acc | Acc  | Acc | 48       |   |   |   |   | 1 |   |   |                |        | S          | C          |
| <i>Phillyrea angustifolia</i> L.                   | Oleaceae         | Acc      | Acc  | Acc  | Acc | Acc | Acc  | Acc | 14       |   |   |   |   | 1 | 1 | 1 |                | S      |            |            |
| <i>Phillyrea latifolia</i> L.                      | Oleaceae         | NL       | NL   | Acc  | Acc | Acc | Acc  | Acc | 60       |   |   |   |   |   |   | 1 |                |        | S          | O          |
| <i>Phlebodium aureum</i> (L.) J.Sm.                | Polypodiaceae    | Acc      | Acc  | Acc  | Acc | Acc | Acc  | Acc | 17       |   | 1 |   | 1 |   |   |   |                |        | S          | O          |
| <i>Phlomis purpurea</i> L.                         | Lamiaceae        | NL       | NL   | Acc  | Acc | Acc | Acc  | Acc | 0        |   |   |   |   | 1 |   |   |                |        | P          |            |
| <i>Phoenix canariensis</i> Chabaud                 | Arecaceae        | Acc      | Acc  | Acc  | Acc | Acc | Acc  | Acc | 5        | 1 | 1 | 1 | 1 | 1 | 1 | 1 | A              | S      |            |            |
| <i>Phoenix dactylifera</i> L.                      | Arecaceae        | Acc      | Acc  | Acc  | Acc | Acc | Acc  | Acc | 8        |   | 1 |   | 1 | 1 | 1 | 1 |                |        | I          | C          |
| <i>Phormium tenax</i> J.R.Forst. & G.Forst.        | Xanthorrhoeaceae | Acc      | Acc  | Acc  | Acc | Acc | Acc  | Acc | 3        |   |   |   | 1 |   |   |   |                |        | S          | O          |
| <i>Phragmites australis</i> (Cav.) Trin. ex Steud. | Poaceae          | Acc      | Acc  | Acc  | Acc | Acc | Acc  | Acc | 1        |   |   | 1 | 1 | 1 | 1 | 1 |                |        | P          |            |
| <i>Phyla nodiflora</i> (L.) Greene                 | Verbenaceae      | Acc      | Acc  | Acc  | Acc | Acc | Acc  | Acc | 5        |   |   | 1 | 1 | 1 |   |   |                |        | S          | O          |
| <i>Phyllanthus tenellus</i> Roxb.                  | Phyllanthaceae   | Acc      | Acc  | Acc  | Acc | Acc | Acc  | Acc | 1        |   |   |   |   | 1 |   |   |                |        | S          |            |
| <i>Phyllis nobla</i> L.                            | Rubiaceae        | Acc      | Acc  | Acc  | Acc | Acc | Acc  | Acc | 3        | 1 | 1 | 1 | 1 | 1 |   |   |                | S      |            |            |
| <i>Phyllis viscosa</i> Webb ex Christ              | Rubiaceae        | Acc      | Acc  | Acc  | Acc | Acc | Acc  | Acc | 1        | 1 |   | 1 | 1 |   |   |   | A              | S      |            |            |
| <i>Physalis peruviana</i> L.                       | Solanaceae       | Acc      | Acc  | Acc  | Acc | Acc | Acc  | Acc | 17       | 1 | 1 | 1 | 1 | 1 |   |   |                |        | S          | C          |
| <i>Phytolacca americana</i> L.                     | Phytolaccaceae   | Acc      | Acc  | Acc  | Acc | Acc | Acc  | Acc | 3        | 1 | 1 |   | 1 | 1 |   |   |                |        | I          | O          |

| Species Name                                     | Family         | Atlantis | Muer | POWO | WFO  | COL | GBIF | TRY | POWO Syn | H | P | G | T | C | F | L | Endemic Status | Native | Non native | Ornam Crop |
|--------------------------------------------------|----------------|----------|------|------|------|-----|------|-----|----------|---|---|---|---|---|---|---|----------------|--------|------------|------------|
| <i>Phytolacca dioica</i> L.                      | Phytolaccaceae | Acc      | Acc  | Acc  | Acc  | Acc | Acc  | Acc | 6        |   | 1 |   | 1 | 1 |   |   |                |        | S          | O          |
| <i>Picconia excelsa</i> (Aiton) DC.              | Oleaceae       | Acc      | Acc  | Acc  | Acc  | Acc | Acc  | Acc | 3        | 1 | 1 | 1 | 1 | 1 | 1 |   |                | S      |            |            |
| <i>Picnomon acarna</i> (L.) Cass.                | Asteraceae     | Acc      | Acc  | Acc  | Acc  | Acc | Acc  | Acc | 7        |   |   |   |   | 1 |   |   |                |        | P          |            |
| <i>Picris hieracioides</i> L.                    | Asteraceae     | Acc      | NL   | Acc  | AmUn | Acc | Acc  | Acc | 2        |   |   |   |   |   |   |   |                | P      |            |            |
| <i>Pilea microphylla</i> (L.) Liebm.             | Urticaceae     | NL       | NL   | Acc  | Acc  | Acc | Acc  | Acc | 22       |   | 1 |   | 1 |   |   |   |                |        | S          |            |
| <i>Pilosocereus pachycladus</i> F.Ritter         | Cactaceae      | NL       | NL   | Acc  | Acc  | Acc | Acc  | Acc | 23       |   |   |   | 1 |   |   | 1 |                | S      |            | O          |
| <i>Pimpinella anagodendron</i> Bolle             | Apiaceae       | Acc      | Acc  | Acc  | AmUn | Acc | Acc  | NL  | 1        |   |   |   | 1 |   |   |   | T              | S      |            |            |
| <i>Pimpinella cumbrae</i> Link.                  | Apiaceae       | Acc      | Acc  | Acc  | AmUn | Acc | Acc  | Acc | 3        |   | 1 |   | 1 |   |   |   | A              | S      |            |            |
| <i>Pimpinella dendroselinum</i> Webb             | Apiaceae       | Syn      | Acc  | Acc  | AmUn | Acc | Acc  | Syn | 2        |   | 1 |   | 1 |   |   |   | A              | S      |            |            |
| <i>Pimpinella junoniae</i> Ceballos & Ortuno     | Apiaceae       | Acc      | Acc  | Acc  | AmUn | Acc | Acc  | Syn | 0        |   |   | 1 |   |   |   |   | G              | S      |            |            |
| <i>Pinus canariensis</i> C.Sm.                   | Pinaceae       | Acc      | Acc  | Acc  | Acc  | Acc | Acc  | Acc | 0        | 1 | 1 | 1 | 1 | 1 |   |   | A              | S      |            |            |
| <i>Pinus halepensis</i> Mill.                    | Pinaceae       | Acc      | Acc  | Acc  | Acc  | Acc | Acc  | Acc | 19       | 1 | 1 | 1 | 1 | 1 | 1 | 1 |                |        | S          | C          |
| <i>Pinus nigra</i> J.F.Arnold                    | Pinaceae       | NL       | NL   | Acc  | Acc  | Acc | Acc  | Acc | 0        |   |   |   | 1 |   |   |   |                |        | S          | C          |
| <i>Pinus pinaster</i> Aiton                      | Pinaceae       | Acc      | Acc  | Acc  | Acc  | Acc | Acc  | Acc | 1        |   |   |   | 1 | 1 |   |   |                |        | S          | C          |
| <i>Pinus pinea</i> L.                            | Pinaceae       | Acc      | Acc  | Acc  | Acc  | Acc | Acc  | Acc | 7        |   |   |   |   | 1 |   |   |                |        | I          | C          |
| <i>Pinus radiata</i> D.Don                       | Pinaceae       | Acc      | Acc  | Acc  | Acc  | Acc | Acc  | Acc | 0        | 1 | 1 | 1 | 1 | 1 |   | 1 |                |        | I          | C          |
| <i>Pinus sylvestris</i> L.                       | Pinaceae       | NL       | NL   | Acc  | Acc  | Acc | Acc  | Acc | 1        |   |   |   |   |   |   |   |                |        | S          | C          |
| <i>Piptatherum coerulescens</i> (Desf.) P.Beauv. | Poaceae        | Acc      | Acc  | Acc  | Acc  | Acc | Acc  | Acc | 5        | 1 |   | 1 | 1 | 1 |   | 1 |                | P      |            |            |
| <i>Pistacia atlantica</i> Desf.                  | Anacardiaceae  | Acc      | Acc  | Acc  | Acc  | Acc | Acc  | Acc | 7        |   | 1 | 1 | 1 | 1 | 1 |   |                | S      |            | O          |
| <i>Pistacia lentiscus</i> L.                     | Anacardiaceae  | Acc      | Acc  | Acc  | Acc  | Acc | Acc  | Acc | 7        |   |   | 1 | 1 | 1 | 1 | 1 |                | S      |            | O          |
| <i>Pistacia terebinthus</i> L.                   | Anacardiaceae  | NL       | NL   | Acc  | Acc  | Acc | Acc  | Acc | 6        |   | 1 |   | 1 | 1 |   |   |                | P      |            | O          |
| <i>Pistia stratiotes</i> L.                      | Araceae        | Acc      | Acc  | Acc  | Acc  | Acc | Acc  | Acc | 27       |   | 1 | 1 | 1 | 1 | 1 | 1 |                |        | S          | O          |
| <i>Pittosporum coriaceum</i> Aiton               | Pittosporaceae | NL       | NL   | Acc  | Acc  | Acc | Acc  | Acc | 0        |   |   |   | 1 |   |   |   | T              | S      |            |            |
| <i>Pittosporum tobira</i> (Thunb.) W.T.Aiton     | Pittosporaceae | NL       | NL   | Acc  | Acc  | Acc | Acc  | Acc | 3        |   |   |   | 1 | 1 |   |   |                |        | S          | O          |

| Species Name                                                                      | Family         | Atlantis | Muer | POWO | WFO  | COL  | GBIF | TRY | POWO Syn | H | P | G | T | C | F | L | Endemic Status | Native | Non native | Ornam Crop |
|-----------------------------------------------------------------------------------|----------------|----------|------|------|------|------|------|-----|----------|---|---|---|---|---|---|---|----------------|--------|------------|------------|
| <i>Pittosporum undulatum</i> Vent.                                                | Pittosporaceae | Acc      | Acc  | Acc  | Acc  | Acc  | Acc  | Acc | 0        |   |   |   | 1 | 1 |   |   |                |        | I          | O          |
| <i>Plantago afra</i> L.                                                           | Plantaginaceae | Acc      | Acc  | Acc  | Acc  | Acc  | Acc  | Acc | 21       | 1 | 1 | 1 | 1 | 1 | 1 | 1 |                | P      |            |            |
| <i>Plantago albicans</i> L.                                                       | Plantaginaceae | Acc      | Acc  | Acc  | Acc  | Acc  | Acc  | Acc | 8        |   |   |   | 1 | 1 | 1 | 1 |                | P      |            |            |
| <i>Plantago amplexicaulis</i> Cav.                                                | Plantaginaceae | Acc      | Acc  | Acc  | Acc  | Acc  | Acc  | Acc | 2        | 1 | 1 | 1 | 1 | 1 | 1 | 1 |                | P      |            |            |
| <i>Plantago arborescens</i> Poir.                                                 | Plantaginaceae | Acc      | NL   | Acc  | AmUn | Acc  | Acc  | Acc | 3        | 1 | 1 | 1 | 1 | 1 |   |   | A              | S      |            |            |
| <i>Plantago asphodeloides</i> Svent.                                              | Plantaginaceae | Acc      | NL   | Acc  | AmUn | Acc  | Acc  | Acc | 0        |   |   | 1 | 1 |   |   |   | A              | S      |            |            |
| <i>Plantago bellardii</i> All.                                                    | Plantaginaceae | Acc      | Acc  | Acc  | AmUn | Acc  | Acc  | Acc | 10       | 1 |   |   | 1 |   |   |   |                |        | P          |            |
| <i>Plantago ciliata</i> Desf.                                                     | Plantaginaceae | Acc      | Acc  | Acc  | Acc  | Acc  | Acc  | Acc | 4        |   |   |   |   | 1 | 1 |   |                | P      |            |            |
| <i>Plantago coronopus</i> L.                                                      | Plantaginaceae | Acc      | Syn  | Acc  | Acc  | Acc  | Acc  | Acc | 26       | 1 | 1 | 1 | 1 | 1 | 1 | 1 | A              | P      |            |            |
| <i>Plantago famaræ</i> Svent.                                                     | Plantaginaceae | Acc      | Acc  | Acc  | AmUn | Acc  | Acc  | Acc | 1        |   |   |   |   |   |   | 1 | L              | S      |            |            |
| <i>Plantago lagopus</i> L.                                                        | Plantaginaceae | Acc      | Acc  | Acc  | Acc  | Acc  | Acc  | Acc | 17       | 1 | 1 | 1 | 1 | 1 | 1 | 1 |                | P      |            |            |
| <i>Plantago lanceolata</i> L.                                                     | Plantaginaceae | Acc      | Acc  | Acc  | Acc  | Acc  | Acc  | Acc | 59       | 1 |   |   | 1 | 1 |   |   |                | P      |            |            |
| <i>Plantago loeflingii</i> L.                                                     | Plantaginaceae | Acc      | Acc  | Acc  | Acc  | Acc  | Acc  | Acc | 4        | 1 |   | 1 | 1 | 1 |   |   |                | P      |            |            |
| <i>Plantago major</i> L.                                                          | Plantaginaceae | Acc      | Acc  | Acc  | Acc  | Acc  | Acc  | Acc | 99       | 1 | 1 | 1 | 1 | 1 | 1 | 1 |                |        | P          |            |
| <i>Plantago ovata</i> Forssk.                                                     | Plantaginaceae | Acc      | Acc  | Acc  | Acc  | Acc  | Acc  | Acc | 24       |   | 1 | 1 | 1 | 1 | 1 | 1 |                | P      |            |            |
| <i>Plantago phaeostoma</i> Boiss. & Heldr.                                        | Plantaginaceae | Acc      | Acc  | Acc  | Acc  | Acc  | Acc  | Acc | 1        |   |   |   |   |   | 1 | 1 |                | P      |            |            |
| <i>Plantago webbii</i> Barneoud                                                   | Plantaginaceae | Acc      | Acc  | Acc  | AmUn | Acc  | Acc  | Acc | 2        |   | 1 |   | 1 | 1 |   |   | A              | S      |            |            |
| <i>Platycapnos spicatus</i> (L.) Bernh.                                           | Papaveraceae   | Acc      | Acc  | Acc  | Acc  | AmUn | Acc  | NL  | 3        |   |   |   | 1 |   | 1 |   |                | P      |            |            |
| <i>Platyserium bifurcatum</i> (Cav.) C.Chr.                                       | Polypodiaceae  | Acc      | Acc  | Acc  | Acc  | Acc  | Acc  | Acc | 2        |   | 1 |   |   |   |   |   |                |        | I          | O          |
| <i>Pleiomeris canariensis</i> (Wild.) A.Dc.                                       | Primulaceae    | Acc      | Acc  | Acc  | Acc  | Acc  | Acc  | Acc | 3        |   | 1 | 1 | 1 | 1 |   |   | A              | S      |            |            |
| <i>Plerandra elegantissima</i> (H.J.Veitch ex Mast.) Lowry, G.M.Plunkett & Frodin | Araliaceae     | NL       | NL   | Acc  | Syn  | Acc  | Acc  | Syn | 5        |   | 1 |   | 1 |   |   |   |                |        | S          |            |
| <i>Plocama pendula</i> Aiton                                                      | Rubiaceae      | Acc      | Acc  | Acc  | Acc  | Acc  | Acc  | Acc | 1        | 1 | 1 | 1 | 1 | 1 | 1 |   | A              | S      |            |            |
| <i>Pluchea carolinensis</i> (Jacq.) D.Don                                         | Asteraceae     | Acc      | Acc  | Acc  | Acc  | Acc  | Acc  | Acc | 4        |   |   |   |   | 1 |   |   |                |        | S          |            |
| <i>Pluchea dioscoridis</i> (L.) DC.                                               | Asteraceae     | Acc      | Acc  | Acc  | Acc  | Acc  | Acc  | Acc | 13       |   |   |   | 1 |   |   |   |                |        | S          |            |



| Species Name                                          | Family          | Atlantis | Muer | POWO | WFO  | COL | GBIF | TRY | POWO Syn | H | P | G | T | C | F | L | Endemic Status | Native | Non native | Ornam Crop |
|-------------------------------------------------------|-----------------|----------|------|------|------|-----|------|-----|----------|---|---|---|---|---|---|---|----------------|--------|------------|------------|
| <i>Pluchea ovalis</i> (Pers.) DC.                     | Asteraceae      | Acc      | Acc  | Acc  | Acc  | Acc | Acc  | Acc | 7        |   |   |   | 1 |   |   |   |                |        | I          |            |
| <i>Plumbago auriculata</i> Lam.                       | Plumbaginaceae  | Acc      | Acc  | Acc  | Acc  | Acc | Acc  | Acc | 5        |   | 1 | 1 | 1 | 1 |   |   |                |        | S          | O          |
| <i>Plumeria obtusa</i> L.                             | Apocynceae      | NL       | NL   | Acc  | Acc  | Acc | Acc  | Acc | 24       |   | 1 | 1 | 1 |   |   |   |                |        | S          | O          |
| <i>Plumeria rubra</i> L.                              | Apocynceae      | NL       | NL   | Acc  | Acc  | Acc | Acc  | Acc | 34       |   | 1 |   |   | 1 |   |   |                |        | S          | O          |
| <i>Poa angustifolia</i> L.                            | Poaceae         | Acc      | Acc  | Acc  | Acc  | Acc | Acc  | Acc | 18       |   | 1 | 1 | 1 |   |   |   |                | P      |            |            |
| <i>Poa annua</i> L.                                   | Poaceae         | Syn      | Acc  | Acc  | Acc  | Acc | Acc  | Acc | 25       | 1 | 1 | 1 | 1 | 1 | 1 | 1 |                | P      |            |            |
| <i>Poa bulbosa</i> L.                                 | Poaceae         | Acc      | Acc  | Acc  | Acc  | Acc | Acc  | Acc | 22       | 1 |   |   | 1 | 1 |   |   |                | S      |            |            |
| <i>Poa infirma</i> Kunth                              | Poaceae         | Syn      | Acc  | Acc  | Acc  | Acc | Acc  | Acc | 9        |   | 1 |   | 1 | 1 | 1 | 1 |                | P      |            |            |
| <i>Poa leptoclada</i> Hochst. ex A.Rich.              | Poaceae         | Acc      | Acc  | Acc  | Acc  | Acc | Acc  | Acc | 4        |   | 1 |   | 1 |   |   |   |                | P      |            |            |
| <i>Poa pitardiana</i> H.Scholz                        | Poaceae         | Acc      | Acc  | Acc  | Acc  | Acc | Acc  | Acc | 0        |   |   | 1 | 1 | 1 |   |   | A              | S      |            |            |
| <i>Poa pratensis</i> L.                               | Poaceae         | Acc      | Acc  | Acc  | Acc  | Acc | Acc  | Acc | 77       |   |   |   | 1 | 1 |   |   |                | P      |            |            |
| <i>Poa trivialis</i> L.                               | Poaceae         | Acc      | Acc  | Acc  | Acc  | Acc | Acc  | Acc | 34       |   |   |   | 1 |   |   | 1 |                | P      |            |            |
| <i>Podranea ricasoliana</i> (Tanfani) Sprague         | Bignoniaceae    | Acc      | NL   | Acc  | Acc  | Acc | Acc  | Acc | 3        |   | 1 |   | 1 |   | 1 |   |                |        | S          | O          |
| <i>Polycarpaea aristata</i> (Aiton) C.Sm. Ex DC:      | Caryophyllaceae | Acc      | Acc  | Acc  | AmUn | Acc | Acc  | Acc | 3        |   | 1 |   | 1 | 1 |   |   | A              | S      |            |            |
| <i>Polycarpaea carnosa</i> C.Sm. Ex Buch              | Caryophyllaceae | Acc      | Acc  | Acc  | AmUn | Acc | Acc  | Acc | 1        |   |   | 1 | 1 | 1 |   |   | A              | S      |            |            |
| <i>Polycarpaea corymbosa</i> (L.) Lam.                | Caryophyllaceae | Syn      | Syn  | Acc  | Acc  | Acc | Acc  | Acc | 22       |   |   | 1 | 1 | 1 |   |   | A              | S      |            |            |
| <i>Polycarpaea divaricata</i> (Aiton) Poir. ex Steud. | Caryophyllaceae | Acc      | Acc  | Acc  | AmUn | Acc | Acc  | Acc | 7        | 1 | 1 | 1 | 1 | 1 | 1 | 1 | A              | S      |            |            |
| <i>Polycarpaea latifolia</i> (Willd.) Poir.           | Caryophyllaceae | Acc      | Acc  | Acc  | AmUn | Acc | Acc  | Acc | 3        |   |   | 1 | 1 | 1 |   |   | A              | S      |            |            |
| <i>Polycarpaea nivea</i> (Aiton) Webb                 | Caryophyllaceae | Acc      | Acc  | Acc  | Acc  | Acc | Acc  | Acc | 17       |   | 1 |   | 1 | 1 | 1 | 1 |                | S      |            |            |
| <i>Polycarpaea robusta</i> (Pit.) G.Kunkel            | Caryophyllaceae | Acc      | Acc  | Acc  | AmUn | Acc | Acc  | NL  | 0        |   |   |   |   |   |   | 1 | L              | S      |            |            |
| <i>Polycarpaea smithii</i> Link                       | Caryophyllaceae | Acc      | Acc  | Acc  | AmUn | Acc | Acc  | Acc | 2        | 1 | 1 | 1 |   |   |   |   | A              | S      |            |            |
| <i>Polycarpaea tenuis</i> Webb ex Christ              | Caryophyllaceae | Acc      | Acc  | Acc  | AmUn | Acc | Acc  | NL  | 0        |   | 1 |   | 1 |   |   |   | A              | S      |            |            |
| <i>Polycarpon alsinifolium</i> (Biv.) Arcang.         | Caryophyllaceae | Acc      | Acc  | Acc  | Syn  | Acc | Acc  | Syn | 5        |   |   |   |   |   |   | 1 |                | P      |            |            |
| <i>Polycarpon tetraphyllum</i> (L.) L.                | Caryophyllaceae | Acc      | Acc  | Acc  | Acc  | Acc | Acc  | Acc | 37       | 1 | 1 | 1 | 1 | 1 | 1 | 1 |                | P      |            |            |

| Species Name                                                      | Family          | Atlantis | Muer | POWO | WFO  | COL | GBIF | TRY | POWO Syn | H | P | G | T | C | F | L | Endemic Status | Native | Non native | Ornam Crop |
|-------------------------------------------------------------------|-----------------|----------|------|------|------|-----|------|-----|----------|---|---|---|---|---|---|---|----------------|--------|------------|------------|
| <i>Polygonum arenastrum</i> Boreau                                | Polygonaceae    | Acc      | NL   | Acc  | Acc  | Acc | Acc  | Acc | 28       |   | 1 |   |   |   |   |   |                |        | S          |            |
| <i>Polygonum aviculare</i> L.                                     | Polygonaceae    | Acc      | Acc  | Acc  | Acc  | Acc | Acc  | Acc | 98       | 1 | 1 | 1 | 1 | 1 | 1 | 1 |                | P      |            |            |
| <i>Polygonum balansae</i> Boiss.                                  | Polygonaceae    | Acc      | NL   | Acc  | AmUn | Acc | Acc  | NL  | 0        |   |   |   | 1 | 1 |   |   |                | S      |            |            |
| <i>Polygonum equisetiforme</i> Sm.                                | Polygonaceae    | Acc      | Acc  | Acc  | Acc  | Acc | Acc  | Acc | 10       |   |   |   |   | 1 | 1 |   |                | P      |            |            |
| <i>Polygonum maritimum</i> L.                                     | Polygonaceae    | Acc      | Acc  | Acc  | Acc  | Acc | Acc  | Acc | 8        |   | 1 |   | 1 | 1 | 1 | 1 |                | S      |            |            |
| <i>Polygonum rurivagum</i> Jord. et Boreau                        | Polygonaceae    | Syn      | NL   | Acc  | Acc  | Syn | Syn  | Acc | 5        | 1 |   |   |   |   |   |   |                |        | S          |            |
| <i>Polypodium macaronesicum</i> A.E. Bobrov                       | Polypodiaceae   | Acc      | Acc  | Acc  | AmUn | Acc | Acc  | Acc | 2        | 1 | 1 | 1 | 1 | 1 | 1 | 1 |                | S      |            |            |
| <i>Polypogon fugax</i> Nees ex Steud.                             | Poaceae         | Acc      | Syn  | Acc  | Acc  | Acc | Acc  | Acc | 3        | 1 | 1 | 1 | 1 | 1 | 1 | 1 |                | P      |            |            |
| <i>Polypogon maritimus</i> Willd.                                 | Poaceae         | Acc      | Syn  | Acc  | Acc  | Acc | Acc  | Acc | 11       |   |   |   | 1 | 1 | 1 | 1 |                | P      |            |            |
| <i>Polypogon monspeliensis</i> (L.) Desf.                         | Poaceae         | Acc      | Acc  | Acc  | Acc  | Acc | Acc  | Acc | 31       | 1 | 1 | 1 | 1 | 1 | 1 | 1 |                | P      |            |            |
| <i>Polypogon viridis</i> (Gouan) Breistr.                         | Poaceae         | Acc      | Acc  | Acc  | Acc  | Acc | Acc  | Acc | 26       | 1 | 1 | 1 | 1 | 1 | 1 | 1 |                | P      |            |            |
| <i>Polystichum aculeatum</i> (L.) Roth ex Mert.                   | Dryopteridaceae | Acc      | Acc  | Acc  | Acc  | Acc | Acc  | Acc | 27       |   | 1 | 1 | 1 |   |   |   |                | S      |            |            |
| <i>Polystichum setiferum</i> (Forssk.) Moore ex Woyn              | Dryopteridaceae | Acc      | Acc  | Acc  | Acc  | Acc | Acc  | Acc | 10       | 1 | 1 | 1 | 1 |   |   |   |                | S      |            |            |
| <i>Pontederia crassipes</i> Mart.                                 | Pontederiaceae  | NL       | NL   | Acc  | Syn  | Syn | Acc  | Syn | 9        |   | 1 |   | 1 |   |   |   |                |        | S          |            |
| <i>Populus alba</i> L.                                            | Salicaceae      | Acc      | Acc  | Acc  | Acc  | Acc | Acc  | Acc | 28       |   | 1 | 1 | 1 | 1 | 1 |   |                |        | I          | O          |
| <i>Populus nigra</i> L.                                           | Salicaceae      | Acc      | Acc  | Acc  | Acc  | Acc | Acc  | Acc | 36       |   |   |   |   | 1 |   |   |                |        | S          | O          |
| <i>Portulaca canariensis</i> Danin & Reyes-Bet.                   | Portulaccaceae  | Acc      | Acc  | Acc  | Acc  | Acc | Acc  | NL  | 0        |   |   |   | 1 |   | 1 | 1 | A              | S      |            |            |
| <i>Portulaca granulatostellulata</i> (Poelln.) Ricceri & Arrigoni | Portulaccaceae  | Acc      | Acc  | Acc  | Acc  | Acc | Acc  | Acc | 1        | 1 | 1 |   | 1 | 1 |   | 1 |                |        | S          |            |
| <i>Portulaca nicaraguensis</i> (Danin & H.G.Baker) Danin          | Portulaccaceae  | Acc      | Acc  | Acc  | Acc  | Acc | Acc  | NL  | 1        |   | 1 |   | 1 |   |   |   |                |        | S          |            |
| <i>Portulaca nitida</i> (Danin & H.G.Baker) Ricceri & Arrigoni    | Portulaccaceae  | Acc      | Acc  | Acc  | Acc  | Acc | Acc  | Acc | 1        |   | 1 |   | 1 |   |   | 1 |                |        | S          |            |
| <i>Portulaca oleracea</i> L.                                      | Portulaccaceae  | Acc      | Acc  | Acc  | Acc  | Acc | Acc  | Acc | 33       | 1 | 1 | 1 | 1 | 1 | 1 | 1 |                |        | S          | C          |
| <i>Portulaca papillatostellulata</i> (Danin & H.G.Baker) Danin    | Portulaccaceae  | Acc      | Syn  | Acc  | Acc  | Syn | Syn  | Acc | 1        |   | 1 |   | 1 |   |   |   |                |        | S          |            |
| <i>Portulacaria afra</i> Jacq.                                    | Didieraceae     | NL       | NL   | Acc  | Acc  | Acc | Acc  | Acc | 2        |   | 1 | 1 | 1 | 1 | 1 | 1 |                |        | S          | O          |

| Species Name                                              | Family           | Atlantis | Muer | POWO | WFO  | COL  | GBIF | TRY | POWO Syn | H | P | G | T | C | F | L | Endemic Status | Native | Non native | Ornam Crop |
|-----------------------------------------------------------|------------------|----------|------|------|------|------|------|-----|----------|---|---|---|---|---|---|---|----------------|--------|------------|------------|
| <i>Potamogeton nodosus</i> Poir.                          | Potamogetonaceae | Acc      | Acc  | Acc  | Acc  | Acc  | Acc  | Acc | 33       |   |   | 1 | 1 | 1 |   |   |                | P      |            |            |
| <i>Potamogeton pusillus</i> L.                            | Potamogetonaceae | Acc      | Acc  | Acc  | Acc  | Acc  | Acc  | Acc | 43       |   |   |   | 1 | 1 |   |   |                | P      |            |            |
| <i>Potamogeton trichoides</i> Cham. & Schltdl.            | Potamogetonaceae | Acc      | Acc  | Acc  | Acc  | Acc  | Acc  | Acc | 7        |   |   |   | 1 | 1 |   |   |                | P      |            |            |
| <i>Potentilla indica</i> (Andrews) Th. Wolf               | Rosaceae         | Acc      | Acc  | Acc  | AmUn | Acc  | Acc  | Acc | 15       |   |   |   | 1 |   |   |   |                |        | S          |            |
| <i>Potentilla reptans</i> L.                              | Rosaceae         | Acc      | Acc  | Acc  | Acc  | Acc  | Acc  | Acc | 14       |   |   | 1 |   |   |   |   |                |        | S          |            |
| <i>Prasium majus</i> L.                                   | Lamiaceae        | Acc      | Acc  | Acc  | Acc  | Acc  | Acc  | Acc | 4        |   |   |   | 1 |   |   |   |                |        | S          |            |
| <i>Prosopis juliflora</i> (Sw.) DC.                       | Fabaceae         | Acc      | Acc  | Acc  | Acc  | Acc  | Acc  | Acc | 5        |   |   |   |   | 1 |   |   |                |        | I          | O          |
| <i>Prunella vulgaris</i> L.                               | Lamiaceae        | Acc      | Acc  | Acc  | Acc  | Acc  | Acc  | Acc | 0        |   | 1 |   | 1 | 1 |   |   |                |        | S          |            |
| <i>Prunus cerasus</i> L.                                  | Rosaceae         | Acc      | Acc  | Acc  | AmUn | Acc  | Acc  | Acc | 33       |   | 1 |   | 1 | 1 |   |   |                |        | S          | C          |
| <i>Prunus domestica</i> L.                                | Rosaceae         | Acc      | Acc  | Acc  | Acc  | Acc  | Acc  | Acc |          |   |   | 1 | 1 | 1 |   |   |                |        | S          | C          |
| <i>Prunus dulcis</i> (Mill.) D.A. Webb                    | Rosaceae         | Acc      | Acc  | Syn  | Acc  | Acc  | Acc  | Acc |          | 1 | 1 | 1 | 1 | 1 | 1 | 1 |                |        | I          | C          |
| <i>Prunus lusitanica</i> L.                               | Rosaceae         | Acc      | NL   | Acc  | Acc  | Acc  | Acc  | Acc | 8        | 1 | 1 | 1 | 1 | 1 |   |   |                | S      |            |            |
| <i>Pseudosasa japonica</i> (Steud.) Makino                | Poaceae          | Acc      | Acc  | Acc  | Acc  | Acc  | Acc  | Acc | 7        |   |   | 1 |   | 1 |   |   |                |        | S          | O          |
| <i>Psidium guajava</i> L.                                 | Myrtaceae        | Acc      | Acc  | Acc  | Acc  | Acc  | Acc  | Acc | 29       |   | 1 |   | 1 |   |   |   |                |        | S          | C          |
| <i>Psilotum nudum</i> (L.) P. Beauv.                      | Psilotaceae      | Acc      | Acc  | Acc  | Acc  | Acc  | Acc  | Acc | 20       |   | 1 |   | 1 |   |   | 1 |                |        | S          |            |
| <i>Pteranthus dichotomus</i> Forssk.                      | Caryophyllaceae  | Acc      | Acc  | Acc  | Acc  | Acc  | Acc  | Acc | 6        |   |   |   |   |   | 1 | 1 |                | P      |            |            |
| <i>Pteridium aquilinum</i> (L.) Kuhn                      | Dennstaedtiaceae | Acc      | Acc  | Acc  | Acc  | Acc  | Acc  | Acc | 45       | 1 | 1 | 1 | 1 | 1 |   | 1 |                | P      |            |            |
| <i>Pteris cretica</i> L.                                  | Pteridaceae      | Acc      | Acc  | Acc  | Acc  | Acc  | Acc  | Acc | 1        |   |   |   |   | 1 |   |   |                |        | S          |            |
| <i>Pteris incompleta</i> Cav.                             | Pteridaceae      | Acc      | Acc  | Acc  | AmUn | Acc  | Acc  | Acc | 3        |   | 1 | 1 | 1 | 1 |   |   |                | S      |            |            |
| <i>Pteris multifida</i> Poir.                             | Pteridaceae      | Acc      | Acc  | Acc  | Acc  | Acc  | Acc  | Acc | 4        | 1 |   |   |   |   |   |   |                |        | S          |            |
| <i>Pteris tremula</i> R.Br.                               | Pteridaceae      | Acc      | Acc  | Acc  | Acc  | Acc  | Acc  | Acc | 3        |   |   |   | 1 | 1 |   |   |                |        | S          |            |
| <i>Pteris vittata</i> L.                                  | Pteridaceae      | Acc      | Acc  | Acc  | Acc  | Acc  | Acc  | Acc | 1        |   | 1 | 1 | 1 | 1 |   |   |                |        | S          | O          |
| <i>Pterocephalus dumetorum</i> (Brouss. ex Willd.) Coult. | Caprifoliaceae   | Acc      | Acc  | Acc  | AmUn | AmUn | Acc  | Syn | 2        |   | 1 |   | 1 | 1 |   |   | A              | S      |            |            |
| <i>Pterocephalus lasiospermus</i> Link                    | Caprifoliaceae   | Acc      | Acc  | Acc  | AmUn | Acc  | Acc  | NL  | 2        |   |   |   | 1 |   |   |   | T              | S      |            |            |

| Species Name                                | Family         | Atlantis | Muer | POWO | WFO  | COL | GBIF | TRY | POWO Syn | H | P | G | T | C | F | L | Endemic Status | Native | Non native | Ornam Crop |
|---------------------------------------------|----------------|----------|------|------|------|-----|------|-----|----------|---|---|---|---|---|---|---|----------------|--------|------------|------------|
| <i>Pterocephalus porphyranthus</i> Svent.   | Caprifoliaceae | Acc      | Acc  | Acc  | AmUn | Acc | Acc  | NL  | 0        |   | 1 |   |   |   |   |   | P              | S      |            |            |
| <i>Pterocephalus virens</i> Webb & Berthel. | Caprifoliaceae | Acc      | Acc  | Acc  | AmUn | Acc | Acc  | Acc | 1        |   |   |   | 1 |   |   |   | T              | S      |            |            |
| <i>Puccinellia maritima</i> (Huds.) Parl.   | Poaceae        | Acc      | Acc  | Acc  | Acc  | Acc | Acc  | Acc | 29       |   |   |   | 1 |   |   |   |                | P      |            |            |
| <i>Pulicaria arabica</i> (L.) Cass.         | Asteraceae     | Acc      | NL   | Acc  | Acc  | Acc | Acc  | Acc | 17       |   |   | 1 | 1 |   |   |   |                | P      |            |            |
| <i>Pulicaria burchardii</i> Hutch.          | Asteraceae     | Acc      | NL   | Acc  | Acc  | Acc | Acc  | Acc | 0        |   |   |   |   |   | 1 |   |                | S      |            |            |
| <i>Pulicaria canariensis</i> Bolle          | Asteraceae     | Acc      | Acc  | Acc  | Acc  | Acc | Acc  | Acc | 0        |   |   |   |   |   | 1 | 1 | A              | S      |            |            |
| <i>Pulicaria odora</i> (L.) Rchb.           | Asteraceae     | Acc      | Acc  | Acc  | Acc  | Acc | Acc  | Acc | 5        |   |   |   |   | 1 |   |   |                | P      |            |            |
| <i>Pulicaria paludosa</i> Link.             | Asteraceae     | Syn      | Acc  | Acc  | AmUn | Acc | Acc  | Syn | 1        |   |   |   | 1 |   |   |   |                | P      |            |            |
| <i>Pulicaria undulata</i> (L.) C.A.Mey.     | Asteraceae     | Acc      | NL   | Acc  | Acc  | Acc | Acc  | Acc | 2        |   |   |   |   | 1 |   |   |                | P      |            |            |
| <i>Punica granatum</i> L.                   | Lythraceae     | Acc      | Acc  | Acc  | Acc  | Acc | Acc  | Acc | 6        | 1 | 1 | 1 | 1 | 1 | 1 | 1 |                |        | S          | C          |
| <i>Pyrostegia venusta</i> (Ker Gawl.) Miers | Bignoniaceae   | Acc      | Acc  | Acc  | Acc  | Acc | Acc  | Acc | 18       |   | 1 |   | 1 | 1 |   |   |                |        | S          | O          |
| <i>Pyrus communis</i> L.                    | Rosaceae       | Acc      | Acc  | Acc  | AmUn | Acc | Acc  | Acc | 26       |   |   |   | 1 |   |   |   |                |        | S          | C          |
| <i>Quercus ilex</i> L.                      | Fagaceae       | Acc      | Acc  | Acc  | Acc  | Acc | Acc  | Acc | 28       |   | 1 | 1 | 1 | 1 |   |   |                |        | S          | O          |
| <i>Quercus robur</i> L.                     | Fagaceae       | Acc      | Acc  | Acc  | Acc  | Acc | Acc  | Acc | 1        |   |   |   | 1 | 1 |   |   |                |        | S          | O          |
| <i>Quercus rotundifolia</i> Lam.            | Fagaceae       | Acc      | NL   | Acc  | Acc  | Acc | Acc  | Acc | 16       |   |   |   |   |   |   | 1 |                |        | S          | O          |
| <i>Quercus suber</i> L.                     | Fagaceae       | Acc      | Acc  | Acc  | Acc  | Acc | Acc  | Acc | 9        |   |   |   | 1 | 1 |   |   |                |        | S          | O          |
| <i>Radiola linoides</i> Roth                | Linaceae       | Acc      | Acc  | Acc  | Acc  | Acc | Acc  | Acc | 10       | 1 | 1 |   | 1 | 1 |   |   |                |        | P          |            |
| <i>Ranunculus aquatilis</i> L.              | Ranunculaceae  | NL       | NL   | Acc  | Acc  | Acc | Acc  | Acc | 59       |   |   |   | 1 |   |   |   |                |        | P          |            |
| <i>Ranunculus arvensis</i> L.               | Ranunculaceae  | Acc      | Acc  | Acc  | Acc  | Acc | Acc  | Acc | 12       |   |   |   |   | 1 |   |   |                | P      |            |            |
| <i>Ranunculus baudotii</i> Godr.            | Ranunculaceae  | NL       | NL   | Acc  | Syn  | Syn | Acc  | Syn | 12       |   |   |   | 1 |   |   |   |                | P      |            |            |
| <i>Ranunculus cortusifolius</i> Willd.      | Ranunculaceae  | Acc      | Acc  | Acc  | Acc  | Acc | Acc  | Acc | 4        | 1 | 1 | 1 | 1 | 1 | 1 | 1 |                | S      |            |            |
| <i>Ranunculus ficaria</i> L.                | Ranunculaceae  | Syn      | Acc  | Acc  | Syn  | Syn | Syn  | Syn | 24       |   |   |   | 1 |   |   |   |                |        | P          |            |
| <i>Ranunculus fluitans</i> Lam.             | Ranunculaceae  | Acc      | Acc  | Acc  | Acc  | Acc | Acc  | Acc | 13       |   |   |   | 1 |   |   |   |                |        | P          |            |
| <i>Ranunculus muricatus</i> L.              | Ranunculaceae  | Acc      | Acc  | Acc  | Acc  | Acc | Acc  | Acc | 16       | 1 | 1 | 1 | 1 | 1 |   |   |                | P      |            |            |

| Species Name                                                            | Family        | Atlantis | Muer | POWO | WFO  | COL | GBIF | TRY | POWO Syn | H | P | G | T | C | F | L | Endemic Status | Native | Non native | Ornam Crop |
|-------------------------------------------------------------------------|---------------|----------|------|------|------|-----|------|-----|----------|---|---|---|---|---|---|---|----------------|--------|------------|------------|
| <i>Ranunculus ololeucos</i> J.Lloyd                                     | Ranunculaceae | Acc      | Acc  | Acc  | Acc  | Acc | Acc  | Acc | 7        |   |   |   | 1 |   |   |   |                |        | S          |            |
| <i>Ranunculus ophioglossifolius</i> Vill.                               | Ranunculaceae | Acc      | Acc  | Acc  | Acc  | Acc | Acc  | Acc | 13       |   |   |   | 1 |   |   |   |                | P      |            |            |
| <i>Ranunculus parviflorus</i> Loebl.                                    | Ranunculaceae | Acc      | Syn  | Acc  | Acc  | Acc | Acc  | Acc | 6        | 1 | 1 | 1 | 1 | 1 |   |   |                | P      |            |            |
| <i>Ranunculus peltatus</i> Schrank                                      | Ranunculaceae | Acc      | Acc  | Acc  | Acc  | Acc | Acc  | Acc | 16       |   |   |   | 1 |   |   |   |                | P      |            |            |
| <i>Ranunculus penicillatus</i> (Dumort.) Bab.                           | Ranunculaceae | Acc      | Acc  | Acc  | Acc  | Acc | Acc  | Acc | 2        |   |   |   | 1 |   |   |   |                |        | S          |            |
| <i>Ranunculus repens</i> L.                                             | Ranunculaceae | Acc      | Acc  | Acc  | Acc  | Acc | Acc  | Acc | 23       |   |   |   | 1 |   |   |   |                | P      |            |            |
| <i>Ranunculus sardous</i> Crantz                                        | Ranunculaceae | Acc      | Acc  | Acc  | Acc  | Acc | Acc  | Acc | 24       |   |   |   | 1 | 1 |   |   |                | P      |            |            |
| <i>Ranunculus trichophyllus</i> Chair ex Vill.                          | Ranunculaceae | Acc      | Acc  | Acc  | Acc  | Acc | Acc  | Acc | 68       |   |   |   | 1 | 1 |   |   |                |        | P          |            |
| <i>Ranunculus trilobus</i> Desf.                                        | Ranunculaceae | Acc      | Acc  | Acc  | Acc  | Acc | Acc  | Acc | 5        | 1 | 1 | 1 | 1 | 1 |   |   |                | P      |            |            |
| <i>Raphanus raphanistrum</i> L.                                         | Brassicaceae  | Acc      | Acc  | Acc  | Acc  | Acc | Acc  | Acc | 28       | 1 | 1 | 1 | 1 | 1 | 1 | 1 |                | P      |            |            |
| <i>Rapistrum rugosum</i> (L.) All.                                      | Brassicaceae  | Acc      | Acc  | Acc  | Acc  | Acc | Acc  | Acc | 41       | 1 | 1 | 1 | 1 | 1 | 1 | 1 |                | P      |            |            |
| <i>Ravenala madagascariensis</i> Sonn.                                  | Musaceae      | NL       | NL   | Acc  | Acc  | Acc | Acc  | Acc | 4        |   | 1 |   | 1 |   | 1 |   |                |        | S          | O          |
| <i>Reichardia crystallina</i> (Sch.Bip. Ex Sch.Bip.) Bramwell           | Asteraceae    | Acc      | Acc  | Acc  | Acc  | Acc | Acc  | Acc | 1        |   |   |   | 1 | 1 |   |   | A              | S      |            |            |
| <i>Reichardia famarae</i> Bramwell & G.Kunkel ex M.J.Gallego & Talavera | Asteraceae    | Acc      | Acc  | Acc  | Acc  | Acc | Acc  | Acc | 0        |   |   |   |   |   | 1 | 1 | A              | S      |            |            |
| <i>Reichardia intermedia</i> (Sch.Bip) Samp.                            | Asteraceae    | NL       | NL   | Acc  | Acc  | Syn | Acc  | Acc | 4        | 1 | 1 |   | 1 | 1 | 1 | 1 |                |        | P          |            |
| <i>Reichardia ligulata</i> (Vent.) G.Kunkel & Sundig                    | Asteraceae    | Acc      | Acc  | Acc  | Acc  | Acc | Acc  | Acc | 1        | 1 | 1 | 1 | 1 | 1 | 1 |   | A              | S      |            |            |
| <i>Reichardia picroides</i> (L.) Roth                                   | Asteraceae    | NL       | NL   | Acc  | Acc  | Acc | Acc  | Acc | 22       |   |   | 1 | 1 | 1 | 1 | 1 |                |        | P          |            |
| <i>Reichardia tingitana</i> (L.) Roth                                   | Asteraceae    | Acc      | Acc  | Acc  | Acc  | Acc | Acc  | Acc | 4        |   | 1 | 1 | 1 | 1 | 1 | 1 |                | P      |            |            |
| <i>Reseda lancerotae</i> Webb ex Del.                                   | Resedaceae    | Syn      | Syn  | Acc  | Syn  | Syn | Syn  | Syn | 1        |   |   |   |   | 1 | 1 | 1 | A              | S      |            |            |
| <i>Reseda lutea</i> L.                                                  | Resedaceae    | Acc      | Acc  | Acc  | Acc  | Acc | Acc  | Acc | 28       |   |   |   |   |   | 1 |   |                | P      |            |            |
| <i>Reseda luteola</i> L.                                                | Resedaceae    | Acc      | Acc  | Acc  | Acc  | Acc | Acc  | Acc | 14       | 1 | 1 |   | 1 | 1 | 1 | 1 |                | P      |            |            |
| <i>Reseda scoparia</i> Brouss. ex Willd.                                | Resedaceae    | Acc      | Acc  | Acc  | AmUn | Acc | Acc  | Acc | 0        |   | 1 | 1 | 1 | 1 |   |   | A              | S      |            |            |
| <i>Retama monosperma</i> (L.) Boiss.                                    | Fabaceae      | Syn      | Acc  | Acc  | Acc  | Acc | Acc  | Acc | 11       | 1 | 1 | 1 | 1 | 1 | 1 |   | A              | S      |            |            |

| Species Name                                      | Family          | Atlantis | Muer | POWO | WFO  | COL | GBIF | TRY | POWO Syn | H | P | G | T | C | F | L | Endemic Status | Native | Non native | Ornam Crop |
|---------------------------------------------------|-----------------|----------|------|------|------|-----|------|-----|----------|---|---|---|---|---|---|---|----------------|--------|------------|------------|
| <i>Retama raetam</i> (Forssk.) Webb & Berthel.    | Fabaceae        | NL       | NL   | Acc  | Acc  | Acc | Acc  | Syn | 3        |   | 1 |   | 1 |   |   | 1 |                |        | P          |            |
| <i>Rhagadiolus stellatus</i> (L.) Gaertn.         | Asteraceae      | Acc      | Acc  | Acc  | Acc  | Acc | Acc  | Acc | 7        |   |   | 1 | 1 | 1 | 1 | 1 |                | P      |            |            |
| <i>Rhamnus alaternus</i> L.                       | Rhamnaceae      | Acc      | Acc  | Acc  | Acc  | Acc | Acc  | Acc | 26       |   |   |   |   | 1 |   |   |                |        | I          |            |
| <i>Rhamnus crenulata</i> Aiton                    | Rhamnaceae      | Acc      | Acc  | Acc  | AmUn | Acc | Acc  | Acc | 0        | 1 | 1 | 1 | 1 | 1 | 1 | 1 | A              | S      |            |            |
| <i>Rhamnus glandulosa</i> Aiton                   | Rhamnaceae      | Acc      | Acc  | Acc  | AmUn | Acc | Acc  | Acc | 1        |   | 1 | 1 | 1 | 1 |   |   |                | S      |            |            |
| <i>Rhamnus integrifolia</i> DC.                   | Rhamnaceae      | Acc      | Acc  | Acc  | AmUn | Acc | Acc  | Acc | 2        |   |   |   | 1 |   |   |   | T              | S      |            |            |
| <i>Rhodalsine geniculata</i> (Poir.) F.N.Williams | Caryophyllaceae | Acc      | Syn  | Acc  | Syn  | Acc | Acc  | Syn | 36       |   |   |   |   | 1 | 1 | 1 |                | P      |            |            |
| <i>Rhus coriaria</i> L.                           | Anacardiaceae   | Acc      | Acc  | Acc  | Acc  | Acc | Acc  | Acc | 6        | 1 | 1 | 1 | 1 | 1 |   |   |                | S      |            | O          |
| <i>Rhynchosia caribaea</i> (Jacq.) DC.            | Fabaceae        | Acc      | Acc  | Acc  | Acc  | Acc | Acc  | Acc | 16       |   |   |   | 1 |   |   |   |                |        | S          |            |
| <i>Ricinus communis</i> L.                        | Euphorbiaceae   | Acc      | Acc  | Acc  | Acc  | Acc | Acc  | Acc | 77       | 1 | 1 | 1 | 1 | 1 | 1 | 1 |                |        | I          | O          |
| <i>Ridolfia segetum</i> (L.) Moris                | Apiaceae        | Acc      | Acc  | Acc  | Acc  | Acc | Acc  | Acc | 11       |   |   |   | 1 | 1 |   | 1 |                |        | S          |            |
| <i>Robinia pseudoacacia</i> L.                    | Fabaceae        | Acc      | Acc  | Acc  | Acc  | Acc | Acc  | Acc | 45       |   |   |   |   | 1 |   |   |                |        | S          | O          |
| <i>Roldana petasitis</i> (Sims) H.Rob. & Brettell | Asteraceae      | Acc      | Acc  | Acc  | Acc  | Acc | Acc  | Acc | 3        |   |   |   | 1 | 1 |   |   |                |        | S          |            |
| <i>Romulea columnae</i> Sebast. & Mauri           | Iridaceae       | Acc      | NL   | Acc  | Acc  | Acc | Acc  | Acc | 4        | 1 | 1 | 1 | 1 | 1 | 1 | 1 |                | S      |            |            |
| <i>Rosa canina</i> L.                             | Rosaceae        | Acc      | Acc  | Acc  | Acc  | Acc | Acc  | Acc | 78       |   | 1 | 1 | 1 | 1 |   |   |                | P      |            | O          |
| <i>Rosa micrantha</i> Borrer ex Sm.               | Rosaceae        | Acc      | NL   | Acc  | Acc  | Acc | Acc  | Acc | 15       | 1 |   |   |   |   |   |   |                |        | P          | O          |
| <i>Rosa rubiginosa</i> L.                         | Rosaceae        | Acc      | NL   | Acc  | Acc  | Acc | Acc  | Acc | 15       |   |   |   |   | 1 |   |   |                |        | P          | O          |
| <i>Rostraria cristata</i> (L.) Tzvelev            | Poaceae         | Acc      | Acc  | Acc  | Acc  | Acc | Acc  | Acc | 67       | 1 | 1 | 1 | 1 | 1 | 1 | 1 |                | P      |            |            |
| <i>Rostraria pumila</i> (Desf.) Tzvelev           | Poaceae         | Acc      | Acc  | Acc  | Acc  | Acc | Acc  | Acc | 17       | 1 | 1 |   | 1 | 1 | 1 | 1 |                | P      |            |            |
| <i>Rubia fruticosa</i> Aiton                      | Rubiaceae       | Acc      | Acc  | Acc  | Acc  | Acc | Acc  | Acc | 7        | 1 | 1 | 1 | 1 | 1 | 1 | 1 |                | S      |            |            |
| <i>Rubia occidens</i> Capelo, M.Seq. & H.Schaef.  | Rubiaceae       | Acc      | Acc  | Acc  | NL   | Acc | Acc  | NL  | 0        | 1 | 1 | 1 | 1 | 1 | 1 | 1 |                | P      |            |            |
| <i>Rubia peregrina</i> L.                         | Rubiaceae       | Acc      | NL   | Acc  | Acc  | Acc | Acc  | Acc | 18       |   | 1 | 1 | 1 | 1 | 1 | 1 |                | S      |            |            |
| <i>Rubus bollei</i> Focke                         | Rosaceae        | Acc      | Acc  | Acc  | Acc  | Acc | Acc  | Acc | 3        | 1 | 1 | 1 | 1 | 1 | 1 |   |                | S      |            |            |
| <i>Rubus palmensis</i> A.Hansen                   | Rosaceae        | Acc      | Acc  | Acc  | AmUn | Acc | Acc  | NL  | 0        |   | 1 | 1 | 1 | 1 |   |   | A              | S      |            |            |

| Species Name                                    | Family         | Atlantis | Muer | POWO | WFO  | COL | GBIF | TRY | POWO Syn | H | P | G | T | C | F | L | Endemic Status | Native | Non native | Ornam Crop |
|-------------------------------------------------|----------------|----------|------|------|------|-----|------|-----|----------|---|---|---|---|---|---|---|----------------|--------|------------|------------|
| <i>Rubus ulmifolius</i> Schott                  | Rosaceae       | Acc      | Acc  | Acc  | Acc  | Acc | Acc  | Acc | 62       | 1 | 1 | 1 | 1 | 1 | 1 |   |                | P      |            |            |
| <i>Ruellia bourgaei</i> Hemsl.                  | Acanthaceae    | Syn      | NL   | Acc  | Acc  | Acc | Acc  | Acc |          |   |   |   | 1 |   |   |   |                |        | S          | O          |
| <i>Rumex acetosella</i> L.                      | Polygonaceae   | Acc      | Acc  | Acc  | Acc  | Acc | Acc  | Acc | 20       | 1 | 1 | 1 | 1 | 1 | 1 | 1 |                |        | P          |            |
| <i>Rumex bipinnatus</i> L.f.                    | Polygonaceae   | Acc      | Acc  | Acc  | Acc  | Acc | Acc  | NL  | 0        |   |   |   |   |   | 1 | 1 |                | P      |            |            |
| <i>Rumex bucephalophorus</i> L.                 | Polygonaceae   | Acc      | NL   | Acc  | Acc  | Acc | Acc  | Acc | 12       | 1 | 1 | 1 | 1 | 1 | 1 | 1 |                | S      |            |            |
| <i>Rumex conglomeratus</i> Murray               | Polygonaceae   | Acc      | Acc  | Acc  | Acc  | Acc | Acc  | Acc | 25       |   | 1 | 1 | 1 | 1 |   |   |                |        | P          |            |
| <i>Rumex crispus</i> L.                         | Polygonaceae   | Acc      | Acc  | Acc  | Acc  | Acc | Acc  | Acc | 15       |   | 1 | 1 | 1 | 1 |   | 1 |                |        | P          |            |
| <i>Rumex cristatus</i> DC.                      | Polygonaceae   | Acc      | NL   | Acc  | Acc  | Acc | Acc  | Acc | 4        |   | 1 |   | 1 |   |   |   |                |        | S          |            |
| <i>Rumex induratus</i> Boiss. Reut.             | Polygonaceae   | Acc      | Acc  | Acc  | Syn  | Acc | Acc  | Syn | 1        |   |   |   | 1 | 1 |   |   |                |        | P          |            |
| <i>Rumex lunaria</i> L.                         | Polygonaceae   | Acc      | Acc  | Acc  | Acc  | Acc | Acc  | Acc | 6        | 1 | 1 | 1 | 1 | 1 | 1 | 1 | A              | S      |            |            |
| <i>Rumex maderensis</i> Lowe                    | Polygonaceae   | Acc      | Acc  | Acc  | Acc  | Acc | Acc  | Acc | 1        | 1 | 1 | 1 | 1 | 1 |   |   |                | S      |            |            |
| <i>Rumex obtusifolius</i> L.                    | Polygonaceae   | Acc      | Acc  | Acc  | Acc  | Acc | Acc  | Acc | 15       | 1 | 1 | 1 | 1 | 1 |   |   |                |        | P          |            |
| <i>Rumex palustris</i> Sm.                      | Polygonaceae   | Acc      | NL   | Acc  | Acc  | Acc | Acc  | Acc | 7        |   |   |   | 1 |   |   |   |                |        | P          |            |
| <i>Rumex pulcher</i> L.                         | Polygonaceae   | Acc      | NL   | Acc  | Acc  | Acc | Acc  | Acc | 10       | 1 | 1 | 1 | 1 | 1 |   |   |                |        | P          |            |
| <i>Rumex spinosus</i> L.                        | Polygonaceae   | Syn      | Syn  | Acc  | Syn  | Acc | Acc  | Syn | 4        | 1 | 1 | 1 | 1 | 1 | 1 | 1 |                | P      |            |            |
| <i>Rumex vesicarius</i> L.                      | Polygonaceae   | Acc      | Acc  | Acc  | Acc  | Acc | Acc  | Acc | 5        | 1 | 1 | 1 | 1 | 1 | 1 | 1 |                | P      |            |            |
| <i>Ruppia maritima</i> L.                       | Ruppiaceae     | Acc      | Acc  | Acc  | Acc  | Acc | Acc  | Acc | 36       |   | 1 | 1 | 1 | 1 | 1 | 1 |                | S      |            |            |
| <i>Ruscus aculeatus</i> L.                      | Asparagaceae   | Acc      | Acc  | Acc  | Acc  | Acc | Acc  | Acc | 6        |   |   |   | 1 |   |   | 1 |                |        | S          |            |
| <i>Ruscus hypoglossum</i> L.                    | Asparagaceae   | Acc      | Acc  | Acc  | Acc  | Acc | Acc  | Acc | 4        |   |   |   |   | 1 |   |   |                |        | S          |            |
| <i>Russelia equisetiformis</i> Schltld. & Cham. | Plantaginaceae | NL       | NL   | Acc  | Acc  | Acc | Acc  | Acc | 1        |   | 1 |   | 1 | 1 |   |   |                |        | S          | O          |
| <i>Ruta chalepensis</i> L.                      | Rutaceae       | Acc      | Acc  | Acc  | Acc  | Acc | Acc  | Acc | 6        | 1 | 1 | 1 | 1 | 1 | 1 | 1 |                |        | P          |            |
| <i>Ruta graveolens</i> L.                       | Rutaceae       | Acc      | Acc  | Acc  | Acc  | Acc | Acc  | Acc | 11       |   |   |   |   | 1 |   |   |                |        | S          | C          |
| <i>Ruta microcarpa</i> Svent.                   | Rutaceae       | Acc      | Acc  | Acc  | AmUn | Acc | Acc  | Acc | 0        |   |   | 1 |   |   |   |   | G              | S      |            |            |
| <i>Ruta oreojasme</i> Webb & Berthel.           | Rutaceae       | Acc      | Acc  | Acc  | AmUn | Acc | Acc  | Acc | 0        |   |   |   |   | 1 |   |   | C              | S      |            |            |

| Species Name                                            | Family          | Atlantis | Muer | POWO | WFO  | COL | GBIF | TRY | POWO Syn | H | P | G | T | C | F | L | Endemic Status | Native | Non native | Ornam Crop |
|---------------------------------------------------------|-----------------|----------|------|------|------|-----|------|-----|----------|---|---|---|---|---|---|---|----------------|--------|------------|------------|
| <i>Ruta pinnata</i> L.f.                                | Rutaceae        | Acc      | Acc  | Acc  | AmUn | Acc | Acc  | Acc | 1        |   | 1 |   | 1 |   |   |   | A              | S      |            |            |
| <i>Rutheopsis herbanica</i> (Bolle) A.Hansen & G.Kunkel | Apiaceae        | Acc      | Acc  | Acc  | AmUn | Acc | Acc  | NL  | 2        |   |   |   |   |   | 1 | 1 | A              | S      |            |            |
| <i>Sabulina mediterranea</i> (Ledeb. ex Link) Rchb.     | Caryophyllaceae | Syn      | Syn  | Acc  | AmUn | Syn | Acc  | Syn | 14       |   |   | 1 |   |   |   |   |                |        | S          |            |
| <i>Saccharum officinarum</i> L.                         | Poaceae         | Acc      | Acc  | Acc  | Acc  | Acc | Acc  | Acc | 11       |   |   |   | 1 | 1 |   |   |                |        | S          | C          |
| <i>Sagina apetala</i> Ard.                              | Caryophyllaceae | Acc      | Acc  | Acc  | Acc  | Acc | Acc  | Acc | 37       | 1 | 1 | 1 | 1 | 1 | 1 | 1 |                | P      |            |            |
| <i>Sagina maritima</i> G.Don                            | Caryophyllaceae | Acc      | Acc  | Acc  | Acc  | Acc | Acc  | Acc | 16       |   |   |   | 1 |   |   |   |                | P      |            |            |
| <i>Sagina procumbens</i> L.                             | Caryophyllaceae | Acc      | Acc  | Acc  | Acc  | Acc | Acc  | Acc | 18       | 1 | 1 |   | 1 | 1 |   |   |                | P      |            |            |
| <i>Salicornia perennis</i> Mill.                        | Amaranthaceae   | Syn      | Syn  | Acc  | Syn  | Acc | Acc  | Syn | 12       |   |   |   |   | 1 | 1 | 1 |                | S      |            |            |
| <i>Salix fragilis</i> L.                                | Salicaceae      | NL       | Acc  | Acc  | Syn  | Acc | Acc  | Acc | 33       | 1 |   | 1 | 1 | 1 |   |   |                |        | S          | O          |
| <i>Salix pedicellata</i> (C.Sm. ex Link) A.K.Skvortsov  | Salicaceae      | Syn      | Syn  | Acc  | Acc  | Syn | Syn  | Acc | 1        | 1 | 1 | 1 | 1 | 1 |   |   |                | S      |            |            |
| <i>Salpichroa organifolia</i> (Lam.) Baill.             | Solanaceae      | Acc      | Acc  | Acc  | Acc  | Acc | Acc  | Acc | 13       |   |   |   | 1 | 1 | 1 |   |                |        | S          |            |
| <i>Salsola divaricata</i> Masson ex Link                | Amaranthaceae   | Acc      | Acc  | Acc  | Acc  | Syn | Acc  | NL  | 3        |   | 1 | 1 | 1 | 1 | 1 | 1 | A              | S      |            |            |
| <i>Salsola kali</i> L.                                  | Amaranthaceae   | Acc      | Acc  | Acc  | Acc  | Syn | Syn  | Acc | 18       |   |   |   | 1 | 1 | 1 |   |                | P      |            |            |
| <i>Salsola longifolia</i> Forssk.                       | Amaranthaceae   | NL       | NL   | Acc  | Acc  | Acc | Acc  | Acc | 8        |   |   |   | 1 |   |   |   |                |        | P          |            |
| <i>Salsola oppositifolia</i> Desf.                      | Amaranthaceae   | NL       | NL   | Acc  | Acc  | Acc | Acc  | Acc | 2        |   |   | 1 | 1 |   | 1 | 1 |                | P      |            |            |
| <i>Salvia aegyptiaca</i> L.                             | Lamiaceae       | Syn      | Acc  | Acc  | Acc  | Syn | Acc  | Acc | 7        |   |   | 1 | 1 | 1 | 1 | 1 |                | S      |            |            |
| <i>Salvia africana</i> L.                               | Lamiaceae       | Acc      | Acc  | Acc  | Syn  | Acc | Acc  | Syn | 10       |   | 1 |   |   |   |   |   |                |        | S          |            |
| <i>Salvia broussonetii</i> Benth.                       | Lamiaceae       | Acc      | Acc  | Acc  | Acc  | Acc | Acc  | Acc | 2        |   |   |   | 1 |   |   |   | T              | S      |            |            |
| <i>Salvia canariensis</i> L.                            | Lamiaceae       | Acc      | Acc  | Acc  | Acc  | Acc | Acc  | Acc | 5        | 1 | 1 | 1 | 1 | 1 | 1 | 1 | A              | S      |            |            |
| <i>Salvia coccinea</i> Buc'hoz ex Etl.                  | Lamiaceae       | Acc      | Acc  | Acc  | Acc  | Acc | Acc  | Acc | 12       |   | 1 | 1 | 1 | 1 |   | 1 |                |        | S          |            |
| <i>Salvia fruticosa</i> Mill.                           | Lamiaceae       | Acc      | Acc  | Acc  | Acc  | Acc | Acc  | Acc | 15       | 1 |   |   | 1 |   |   |   |                |        | S          |            |
| <i>Salvia herbanica</i> A.Santos & M.Fernandez          | Lamiaceae       | Syn      | Acc  | Acc  | Acc  | Acc | Syn  | NL  | 1        |   |   |   |   |   | 1 |   | F              | S      |            |            |
| <i>Salvia hispanica</i> L.                              | Lamiaceae       | NL       | NL   | Acc  | Acc  | Acc | Acc  | Acc | 5        |   |   |   |   | 1 |   |   |                |        | S          |            |
| <i>Salvia leucantha</i> Cav.                            | Lamiaceae       | Acc      | Acc  | Acc  | Acc  | Acc | Acc  | Acc | 0        | 1 | 1 | 1 | 1 | 1 |   |   |                |        | S          | O          |



| Species Name                                                | Family         | Atlantis | Muer | POWO | WFO  | COL | GBIF | TRY | POWO Syn | H | P | G | T | C | F | L | Endemic Status | Native | Non native | Ornam Crop |
|-------------------------------------------------------------|----------------|----------|------|------|------|-----|------|-----|----------|---|---|---|---|---|---|---|----------------|--------|------------|------------|
| <i>Salvia microphylla</i> Kunth                             | Lamiaceae      | NL       | Acc  | Acc  | Acc  | Acc | Acc  | Acc | 0        |   |   |   |   | 1 |   |   |                |        | S          |            |
| <i>Salvia officinalis</i> L.                                | Lamiaceae      | Acc      | Acc  | Acc  | Acc  | Acc | Acc  | Acc | 0        |   |   |   | 1 |   |   |   |                |        | S          | C          |
| <i>Salvia rosmarinus</i> Schleid.                           | Lamiaceae      | Acc      | Syn  | Acc  | Syn  | Acc | Acc  | Syn | 19       | 1 | 1 | 1 | 1 | 1 |   |   |                |        | S          | C          |
| <i>Salvia verbenaca</i> L.                                  | Lamiaceae      | Acc      | Acc  | Acc  | Acc  | Acc | Acc  | Acc | 81       | 1 | 1 | 1 | 1 | 1 | 1 | 1 |                |        | P          | C          |
| <i>Salvinia molesta</i> D.S. Mitch                          | Salviniaceae   | Acc      | NL   | Acc  | Syn  | Acc | Acc  | Syn | 1        |   |   |   |   | 1 |   |   |                |        | I          | O          |
| <i>Salvinia natans</i> (L.) All.                            | Salviniaceae   | Acc      | Acc  | Acc  | Acc  | Acc | Acc  | Acc | 8        |   |   |   | 1 | 1 |   |   |                |        | S          | O          |
| <i>Sambucus canadensis</i> L.                               | Adoxaceae      | Acc      | Acc  | Acc  | Acc  | Acc | Acc  | Acc | 30       |   |   |   |   | 1 |   |   |                |        | S          | O          |
| <i>Sambucus palmensis</i> Link                              | Adoxaceae      | Syn      | Acc  | Acc  | Acc  | Acc | Acc  | Acc | 1        |   | 1 | 1 | 1 | 1 |   |   | A              | S      |            |            |
| <i>Samolus valerandi</i> L.                                 | Primulaceae    | Acc      | Acc  | Acc  | Acc  | Acc | Acc  | Acc | 12       |   | 1 | 1 | 1 | 1 | 1 | 1 |                | P      |            |            |
| <i>Sanguisorba megacarpa</i> (Lowe) Munoz Garm. & C.Navarro | Rosaceae       | Acc      | Syn  | Acc  | AmUn | Syn | Syn  | NL  | 1        | 1 | 1 | 1 | 1 | 1 | 1 |   |                | S      |            |            |
| <i>Sanguisorba menendezii</i> Svent.                        | Rosaceae       | Syn      | Syn  | Acc  | AmUn | Syn | Syn  | Acc | 2        |   |   |   |   | 1 |   |   | C              | S      |            |            |
| <i>Saxifraga stolonifera</i> Curtis                         | Saxifragaceae  | Acc      | Acc  | Acc  | Acc  | Acc | Acc  | Acc | 19       |   |   |   |   | 1 |   |   |                |        | S          |            |
| <i>Scabiosa atropurpurea</i> L.                             | Caprifoliaceae | Acc      | Acc  | Acc  | Acc  | Syn | Syn  | Acc | 11       | 1 | 1 | 1 | 1 | 1 |   |   |                |        | P          |            |
| <i>Scandix brachycarpa</i> Guss.                            | Apiaceae       | Syn      | Acc  | Syn  | Acc  | Acc | Acc  | Syn |          |   |   |   | 1 |   |   |   |                |        | P          |            |
| <i>Scandix pecten-veneris</i> L.                            | Apiaceae       | Acc      | Acc  | Acc  | Acc  | Acc | Acc  | Acc | 18       | 1 | 1 | 1 | 1 | 1 | 1 | 1 |                | P      |            |            |
| <i>Schefflera actinophylla</i> (Endl.) Harms                | Araliaceae     | Acc      | Acc  | Syn  | Acc  | Acc | Acc  | Acc |          |   | 1 |   | 1 | 1 |   |   |                |        | S          | O          |
| <i>Schenkia spicata</i> (L.) G.Mans.                        | Gentianaceae   | Syn      | Syn  | Acc  | Acc  | Acc | Acc  | Acc | 13       |   |   | 1 |   |   |   |   |                |        | P          |            |
| <i>Schinus molle</i> L.                                     | Anacardiaceae  | Acc      | Acc  | Acc  | Acc  | Acc | Acc  | Acc | 3        |   | 1 | 1 | 1 | 1 | 1 | 1 |                |        | S          | C          |
| <i>Schinus terebinthifolia</i> Raddi                        | Anacardiaceae  | Acc      | Acc  | Acc  | Acc  | Acc | Acc  | Acc | 16       |   |   |   | 1 | 1 | 1 |   |                |        | S          | C          |
| <i>Schismus arabicus</i> Nees ex Steud.                     | Poaceae        | Acc      | Acc  | Acc  | Acc  | Acc | Acc  | Acc | 2        |   |   |   | 1 | 1 |   | 1 |                | P      |            |            |
| <i>Schismus barbatus</i> (L.) Thell.                        | Poaceae        | Acc      | Acc  | Acc  | Acc  | Acc | Acc  | Acc | 22       | 1 | 1 | 1 | 1 | 1 | 1 | 1 |                | P      |            |            |
| <i>Schizogyne glaberrima</i> DC.                            | Asteraceae     | Acc      | Acc  | Acc  | Acc  | Acc | Acc  | Acc | 0        |   |   |   | 1 | 1 |   |   | A              | S      |            |            |
| <i>Schizogyne sericea</i> (L.f.) DC.                        | Asteraceae     | Acc      | Acc  | Acc  | Acc  | Acc | Acc  | Acc | 10       | 1 | 1 | 1 | 1 | 1 |   | 1 |                | S      |            |            |
| <i>Schoenoplectiella supina</i> (L.) Lye                    | Cyperaceae     | Syn      | Acc  | Acc  | Acc  | Acc | Acc  | Acc | 18       |   |   |   |   | 1 |   |   |                | P      |            |            |

| Species Name                                               | Family           | Atlantis | Muer | POWO | WFO  | COL | GBIF | TRY | POWO Syn | H | P | G | T | C | F | L | Endemic Status | Native | Non native | Ornam Crop |
|------------------------------------------------------------|------------------|----------|------|------|------|-----|------|-----|----------|---|---|---|---|---|---|---|----------------|--------|------------|------------|
| <i>Schoenoplectus triqueter</i> (L.) Palla in Verh         | Cyperaceae       | Acc      | NL   | Acc  | Acc  | Acc | Acc  | Acc | 22       |   |   |   |   |   |   |   |                | P      |            |            |
| <i>Scilla haemorrhoidalis</i> Webb & Berthel.              | Asparagaceae     | Acc      | Syn  | Acc  | Acc  | Acc | Acc  | Acc | 3        |   | 1 | 1 | 1 | 1 | 1 | 1 | A              | S      |            |            |
| <i>Scilla latifolia</i> Willd. ex Schult. & Schult.f.      | Asparagaceae     | Acc      | Acc  | Acc  | Acc  | Acc | Acc  | Acc | 3        | 1 | 1 | 1 | 1 |   | 1 | 1 |                | S      |            |            |
| <i>Scilla peruviana</i> L.                                 | Asparagaceae     | Acc      | Acc  | Acc  | Acc  | Acc | Acc  | Acc | 41       |   |   |   | 1 |   |   |   |                |        | S          |            |
| <i>Scirpoides holoschoenus</i> (L.) Soják                  | Cyperaceae       | Acc      | Acc  | Acc  | Acc  | Acc | Acc  | Acc | 5        |   | 1 | 1 | 1 | 1 |   |   |                |        | P          |            |
| <i>Scleranthus annuus</i> L.                               | Caryophyllaceae  | Acc      | Acc  | Acc  | Acc  | Acc | Acc  | Acc | 137      |   |   |   | 1 | 1 |   |   |                | P      |            |            |
| <i>Sclerophylax spinescens</i> Miers                       | Solanaceae       | Acc      | Acc  | Acc  | Acc  | Acc | Acc  | Acc | 1        |   |   |   | 1 | 1 | 1 |   |                |        | S          |            |
| <i>Scolymus grandiflorus</i> Desf.                         | Asteraceae       | Acc      | Acc  | Acc  | Acc  | Acc | Acc  | Acc | 2        |   |   |   | 1 |   |   |   |                | P      |            |            |
| <i>Scolymus hispanicus</i> L.                              | Asteraceae       | Acc      | Acc  | Acc  | Acc  | Acc | Acc  | Acc | 0        | 1 |   | 1 | 1 | 1 |   |   |                | P      |            |            |
| <i>Scolymus maculatus</i> L.                               | Asteraceae       | Acc      | Acc  | Acc  | Acc  | Acc | Acc  | Acc | 4        | 1 | 1 | 1 | 1 | 1 | 1 | 1 |                | P      |            |            |
| <i>Scorpiurus muricatus</i> L.                             | Fabaceae         | Acc      | Acc  | Acc  | Acc  | Acc | Acc  | Acc | 13       | 1 | 1 | 1 | 1 | 1 | 1 | 1 |                |        | S          |            |
| <i>Scorpiurus vermiculatus</i> L.                          | Fabaceae         | Acc      | Acc  | Acc  | Acc  | Acc | Acc  | Acc | 3        |   | 1 |   | 1 | 1 |   |   |                |        | S          |            |
| <i>Scorzonera laciniata</i> L.                             | Asteraceae       | Syn      | Acc  | Acc  | Syn  | Acc | Acc  | Acc | 2        |   |   |   | 1 | 1 | 1 | 1 |                |        | P          |            |
| <i>Scorzoneroides palisiae</i> (Izuzq.) Greuter & Talavera | Asteraceae       | Acc      | Acc  | Acc  | Acc  | Acc | Acc  | NL  | 1        |   |   |   | 1 |   |   |   |                | P      |            |            |
| <i>Scrophularia arguta</i> Aiton                           | Scrophulariaceae | Acc      | Acc  | Acc  | Acc  | Acc | Acc  | Acc | 3        | 1 | 1 | 1 | 1 | 1 | 1 | 1 |                | S      |            |            |
| <i>Scrophularia auriculata</i> L.                          | Scrophulariaceae | Acc      | Acc  | Acc  | Acc  | Acc | Acc  | Acc | 9        |   |   |   |   | 1 |   |   |                |        | S          |            |
| <i>Scrophularia calliantha</i> Webb & Berthel.             | Scrophulariaceae | Acc      | Acc  | Acc  | AmUn | Acc | Acc  | Acc | 0        |   |   |   |   | 1 |   |   | C              | S      |            |            |
| <i>Scrophularia glabrata</i> Aiton                         | Scrophulariaceae | Acc      | Acc  | Acc  | AmUn | Acc | Acc  | Acc | 1        |   | 1 |   | 1 |   |   |   | A              | S      |            |            |
| <i>Scrophularia parviflora</i> Wooton & Standl.            | Scrophulariaceae | NL       | NL   | Acc  | Acc  | Acc | Acc  | Acc | 2        |   | 1 |   | 1 |   |   |   | A              | S      |            |            |
| <i>Scrophularia scorodonia</i> L.                          | Scrophulariaceae | Acc      | Acc  | Acc  | Acc  | Acc | Acc  | Acc | 13       |   |   |   | 1 |   |   |   |                |        | S          |            |
| <i>Scrophularia smithii</i> Hornem                         | Scrophulariaceae | Acc      | NL   | Acc  | AmUn | Acc | Acc  | Acc | 1        | 1 | 1 | 1 | 1 | 1 |   |   | A              | S      |            |            |
| <i>Searsia albida</i> (Schousb.) Moffett                   | Anacardiaceae    | Acc      | Acc  | Acc  | Acc  | Acc | Acc  | NL  | 1        |   |   |   |   |   | 1 |   |                | P      |            |            |
| <i>Secale cereale</i> L.                                   | Poaceae          | Acc      | Acc  | Acc  | Acc  | Acc | Acc  | Acc | 19       | 1 | 1 |   | 1 | 1 |   | 1 |                |        | P          | C          |
| <i>Sedum dendroideum</i> Moc. & Sessé ex D.C.              | Crassulaceae     | Acc      | NL   | Acc  | Acc  | Acc | Acc  | Acc | 0        |   | 1 | 1 | 1 | 1 |   |   |                |        | S          |            |

| Species Name                                                      | Family          | Atlantis | Muer | POWO | WFO  | COL | GBIF | TRY | POWO Syn | H | P | G | T | C | F | L | Endemic Status | Native | Non native | Ornam Crop |
|-------------------------------------------------------------------|-----------------|----------|------|------|------|-----|------|-----|----------|---|---|---|---|---|---|---|----------------|--------|------------|------------|
| <i>Sedum lancerottense</i> R.P. Murray                            | Crassulaceae    | Syn      | Acc  | Acc  | AmUn | Acc | Acc  | Syn | 1        |   |   |   |   |   |   | 1 | L              | S      |            |            |
| <i>Sedum mexicanum</i> Britton                                    | Crassulaceae    | Acc      | Acc  | Acc  | Acc  | Acc | Acc  | Acc | 0        |   |   |   | 1 |   |   |   |                |        | S          |            |
| <i>Sedum nudum</i> Aiton                                          | Crassulaceae    | Acc      | NL   | Acc  | Acc  | Acc | Acc  | Acc | 0        |   |   |   |   |   |   | 1 |                | S      |            |            |
| <i>Sedum rubens</i> L.                                            | Crassulaceae    | Acc      | Acc  | Acc  | Acc  | Acc | Acc  | Acc | 9        | 1 | 1 | 1 | 1 | 1 |   | 1 |                | P      |            |            |
| <i>Selaginella denticulata</i> (L.) Spring                        | Selaginellaceae | Acc      | Acc  | Acc  | Syn  | Acc | Acc  | NL  | 2        | 1 | 1 | 1 | 1 | 1 |   |   |                |        | S          |            |
| <i>Selaginella kraussiana</i> (Kunze) A.Braun                     | Selaginellaceae | Acc      | Acc  | Acc  | Acc  | Acc | Acc  | Acc | 2        | 1 |   |   | 1 | 1 |   |   |                | S      |            |            |
| <i>Selaginella selaginoides</i> (L.) P. Beauv. ex Schrank & Mart. | Selaginellaceae | Acc      | Acc  | Acc  | Acc  | Syn | Acc  | Acc | 5        | 1 |   |   |   |   |   |   |                |        | S          |            |
| <i>Selenicereus triangularis</i> (L.) D.R.Hunt                    | Cactaceae       | NL       | NL   | Acc  | Acc  | Acc | Acc  | NL  | 23       |   |   |   | 1 |   |   |   |                |        | S          | O          |
| <i>Selenicereus undatus</i> (Haw.) D.R.Hunt                       | Cactaceae       | Syn      | Syn  | Acc  | Syn  | Acc | Syn  | Syn | 7        |   | 1 | 1 | 1 | 1 | 1 |   |                |        | S          | O          |
| <i>Semele androgyna</i> (L.) Kunth                                | Asparagaceae    | Acc      | Acc  | Acc  | Acc  | Acc | Acc  | Acc | 3        | 1 | 1 | 1 | 1 | 1 |   |   |                | S      |            |            |
| <i>Semele gayae</i> (Webb & Berthel.) Svent. & Kunkel             | Asparagaceae    | Acc      | Acc  | Acc  | Acc  | Acc | Acc  | NL  | 1        |   |   |   |   | 1 |   |   | C              | S      |            |            |
| <i>Senecio angulatus</i> L.f.                                     | Asteraceae      | Acc      | Acc  | Acc  | Acc  | Acc | Acc  | Acc | 4        | 1 | 1 |   | 1 | 1 |   |   |                |        | S          | O          |
| <i>Senecio bollei</i> Sundig & G.Kunkel                           | Asteraceae      | Acc      | Acc  | Acc  | Acc  | Acc | Acc  | Acc | 1        |   |   |   |   |   | 1 |   | F              | S      |            |            |
| <i>Senecio flavus</i> (Decne) Sch.Bip.                            | Asteraceae      | Acc      | Acc  | Acc  | Acc  | Acc | Acc  | Acc | 4        |   |   |   | 1 | 1 | 1 | 1 |                | P      |            |            |
| <i>Senecio glaucus</i> L.                                         | Asteraceae      | Acc      | Acc  | Acc  | Acc  | Acc | Acc  | Acc | 0        | 1 |   | 1 | 1 | 1 | 1 | 1 |                | P      |            |            |
| <i>Senecio ilsae</i> A.Santos & Reyes-Bet.                        | Asteraceae      | Acc      | Acc  | Acc  | NL   | Acc | Acc  | NL  | 2        |   |   | 1 |   |   |   |   | G              | S      |            |            |
| <i>Senecio incrassatus</i> Lowe                                   | Asteraceae      | Acc      | Acc  | Acc  | Acc  | Acc | Acc  | NL  | 0        | 1 | 1 |   |   |   |   |   |                | S      |            |            |
| <i>Senecio leucanthemifolius</i> Poir.                            | Asteraceae      | Acc      | NL   | Acc  | Acc  | Acc | Acc  | Acc | 0        |   |   | 1 | 1 | 1 | 1 | 1 |                | P      |            |            |
| <i>Senecio massaicus</i> (Maire) Maire                            | Asteraceae      | Acc      | Acc  | Acc  | Acc  | Acc | Acc  | Acc | 1        |   |   |   | 1 | 1 | 1 | 1 |                | P      |            |            |
| <i>Senecio teneriffae</i> Sch. Bip.                               | Asteraceae      | Acc      | Acc  | Acc  | Acc  | Acc | Acc  | Acc | 0        | 1 | 1 | 1 | 1 | 1 |   |   |                | S      |            |            |
| <i>Senecio vulgaris</i> L.                                        | Asteraceae      | Acc      | Acc  | Acc  | Acc  | Acc | Acc  | Acc | 1        | 1 | 1 | 1 | 1 | 1 | 1 | 1 |                | P      |            |            |
| <i>Senna bicapsularis</i> (L.) Roxb.                              | Fabaceae        | Acc      | Acc  | Acc  | Acc  | Acc | Acc  | Acc | 4        | 1 | 1 | 1 | 1 | 1 | 1 |   |                |        | S          | O          |
| <i>Senna corymbosa</i> (Lam.) H.S.Irwin & Barneby                 | Fabaceae        | Acc      | Acc  | Acc  | Acc  | Acc | Acc  | Acc | 6        |   |   |   |   | 1 |   |   |                |        | S          | O          |
| <i>Senna didymobotrya</i> (Fresen.) H.S.Irwin & Barneby           | Fabaceae        | Acc      | Acc  | Acc  | Acc  | Acc | Acc  | Acc | 5        |   |   |   | 1 | 1 | 1 |   |                |        | S          | O          |

| Species Name                                             | Family        | Atlantis | Muer | POWO | WFO | COL | GBIF | TRY | POWO Syn | H | P | G | T | C | F | L | Endemic Status | Native | Non native | Ornam Crop |
|----------------------------------------------------------|---------------|----------|------|------|-----|-----|------|-----|----------|---|---|---|---|---|---|---|----------------|--------|------------|------------|
| <i>Senna multiglandulosa</i> (Jacq.) H.S.Irwin & Barneby | Fabaceae      | Acc      | Acc  | Acc  | Acc | Acc | Acc  | Acc | 8        |   |   |   |   |   | 1 |   |                |        | S          | O          |
| <i>Senna occidentalis</i> (L.) Link                      | Fabaceae      | Acc      | Acc  | Acc  | Acc | Acc | Acc  | Acc | 18       |   |   |   |   | 1 |   |   |                |        | S          | O          |
| <i>Senna spectabilis</i> (DC.) H.S.Irwin & Barneby       | Fabaceae      | NL       | Acc  | Acc  | Acc | Acc | Acc  | Acc | 2        |   |   |   |   | 1 |   |   |                |        | S          | O          |
| <i>Serapias parviflora</i> Parl.                         | Orchidaceae   | Acc      | Acc  | Acc  | Acc | Acc | Acc  | Acc | 6        | 1 | 1 |   | 1 | 1 |   | 1 |                | S      |            |            |
| <i>Sesleria albicans</i> Kit.                            | Poaceae       | Syn      | Syn  | Acc  | Acc | Acc | Acc  | Acc | 13       |   | 1 |   |   |   |   |   |                | P      |            |            |
| <i>Sesuvium portulacastrum</i> (L.) L.                   | Aizoaceae     | Acc      | Acc  | Acc  | Acc | Acc | Acc  | Acc | 31       |   |   |   |   | 1 | 1 | 1 |                |        | I          | O          |
| <i>Sesuvium verrucosum</i> Raf.                          | Aizoaceae     | Acc      | NL   | Acc  | Acc | Acc | Acc  | Acc | 2        |   |   |   |   | 1 |   |   |                |        | S          | O          |
| <i>Setaria geminata</i> (Forssk.) Veldkamp               | Poaceae       | Syn      | Syn  | Acc  | Syn | Acc | Acc  | NL  | 24       |   |   |   |   | 1 |   |   |                |        | P          |            |
| <i>Setaria italica</i> (L.) P.Beauv.                     | Poaceae       | Acc      | NL   | Acc  | Acc | Acc | Acc  | Acc | 70       |   |   |   |   | 1 |   |   |                |        | P          |            |
| <i>Setaria megaphylla</i> (Steud.) T. Durant & Schinz    | Poaceae       | Acc      | Acc  | Acc  | Acc | Acc | Acc  | Acc | 16       |   | 1 |   | 1 |   |   |   |                |        | S          |            |
| <i>Setaria parviflora</i> (Poir.) M. Kerguelen           | Poaceae       | Acc      | Acc  | Acc  | Acc | Acc | Acc  | Acc | 107      |   | 1 | 1 | 1 | 1 |   |   |                |        | P          |            |
| <i>Setaria pumila</i> (Poir.) Roem. & Schult.            | Poaceae       | Acc      | Acc  | Acc  | Acc | Syn | Syn  | Acc | 26       |   | 1 | 1 | 1 | 1 | 1 |   |                |        | P          |            |
| <i>Setaria verticillata</i> (L.) P.Beauv.                | Poaceae       | Syn      | Syn  | Acc  | Acc | Acc | Acc  | Acc | 41       | 1 | 1 | 1 | 1 | 1 | 1 | 1 |                | P      |            |            |
| <i>Setaria viridis</i> (L.) P.Beauv.                     | Poaceae       | Acc      | Acc  | Acc  | Acc | Acc | Acc  | Acc | 54       |   |   |   | 1 | 1 |   |   |                |        | P          |            |
| <i>Sherardia arvensis</i> L.                             | Rubiaceae     | Acc      | Acc  | Acc  | Acc | Acc | Acc  | Acc | 11       | 1 | 1 | 1 | 1 | 1 | 1 | 1 |                | P      |            |            |
| <i>Sicyos edulis</i> Jacq.                               | Cucurbitaceae | Syn      | Syn  | Acc  | Syn | Syn | Syn  | Syn | 5        |   | 1 |   |   | 1 |   |   |                |        | S          | C          |
| <i>Sida acuta</i> Burm.f.                                | Malvaceae     | Acc      | Acc  | Acc  | Acc | Acc | Acc  | Acc | 38       |   |   |   | 1 | 1 |   |   |                |        | S          |            |
| <i>Sida rhombifolia</i> L.                               | Malvaceae     | Acc      | Acc  | Acc  | Acc | Acc | Acc  | Acc | 37       |   | 1 | 1 | 1 | 1 |   |   |                |        | S          |            |
| <i>Sida spinosa</i> L.                                   | Malvaceae     | Acc      | NL   | Acc  | Acc | Acc | NL   | Acc | 27       | 1 | 1 |   |   |   |   |   |                |        | S          |            |
| <i>Sidastrum paniculatum</i> (L.) Fryxell                | Malvaceae     | Acc      | Acc  | Acc  | Acc | Acc | Acc  | Acc | 11       |   |   |   | 1 |   |   |   |                |        | S          | O          |
| <i>Sideritis amagroi</i> Marrero Rodr. & B.Navarro       | Lamiaceae     | Acc      | Acc  | Acc  | Acc | Acc | Acc  | Acc | 0        |   |   |   |   | 1 |   |   | C              | S      |            |            |
| <i>Sideritis barbellata</i> Mend.-Heuer                  | Lamiaceae     | Acc      | Acc  | Acc  | Acc | Acc | Acc  | Acc | 1        |   | 1 |   |   |   |   |   | P              | S      |            |            |
| <i>Sideritis bolleana</i> Bornm.                         | Lamiaceae     | Acc      | NL   | Acc  | Acc | Acc | Acc  | Acc | 1        |   | 1 |   |   |   |   |   | P              | S      |            |            |
| <i>Sideritis brevicaulis</i> Mend.-Heuer                 | Lamiaceae     | Acc      | Acc  | Acc  | Acc | Acc | Acc  | Acc | 1        |   |   |   | 1 |   |   |   | T              | S      |            |            |

| Species Name                                                   | Family     | Atlantis | Muer | POWO | WFO  | COL  | GBIF | TRY | POWO Syn | H | P | G | T | C | F | L | Endemic Status | Native | Non native | Ornam Crop |
|----------------------------------------------------------------|------------|----------|------|------|------|------|------|-----|----------|---|---|---|---|---|---|---|----------------|--------|------------|------------|
| <i>Sideritis canariensis</i> L.                                | Lamiaceae  | Acc      | Acc  | Acc  | Acc  | Acc  | Acc  | Acc | 3        | 1 | 1 |   | 1 |   |   |   | A              | S      |            |            |
| <i>Sideritis cretica</i> L.                                    | Lamiaceae  | Acc      | NL   | Acc  | Acc  | Acc  | Acc  | Acc | 1        |   |   |   | 1 |   |   |   | T              | S      |            |            |
| <i>Sideritis cystosiphon</i> Svent.                            | Lamiaceae  | Acc      | Acc  | Acc  | Acc  | Acc  | Acc  | Acc | 1        |   |   |   | 1 |   |   |   | T              | S      |            |            |
| <i>Sideritis dasygnaphala</i> (Webb & Berthel.) Clos           | Lamiaceae  | Acc      | Acc  | Acc  | Acc  | Acc  | Acc  | Acc | 1        |   |   |   |   | 1 |   |   | C              | S      |            |            |
| <i>Sideritis dendrochahorra</i> Bolle                          | Lamiaceae  | Acc      | Acc  | Acc  | Acc  | Acc  | Acc  | Acc | 2        |   |   |   | 1 |   |   |   | T              | S      |            |            |
| <i>Sideritis discolor</i> Willd. ex Bolle                      | Lamiaceae  | Acc      | Acc  | Acc  | Acc  | Acc  | Acc  | Acc | 1        |   |   |   |   | 1 |   |   | C              | S      |            |            |
| <i>Sideritis eriocephala</i> Marrero Rodr. ex Negrín & P.Pérez | Lamiaceae  | Acc      | Acc  | Acc  | AmUn | Acc  | Acc  | Acc | 1        |   |   |   | 1 |   |   |   | T              | S      |            |            |
| <i>Sideritis ferrensis</i> P.Pérez & Negrín                    | Lamiaceae  | Acc      | Acc  | Acc  | Acc  | Acc  | Acc  | Acc | 0        | 1 |   |   |   |   |   |   | H              | S      |            |            |
| <i>Sideritis gomeraea</i> de Noé ex Bolle                      | Lamiaceae  | Acc      | NL   | Acc  | Syn  | Acc  | Acc  | Acc | 1        |   |   | 1 |   |   |   |   | G              | S      |            |            |
| <i>Sideritis guayedrae</i> Marrero Rodr.                       | Lamiaceae  | Acc      | Acc  | Acc  | Acc  | Acc  | Acc  | NL  | 0        |   |   |   |   | 1 |   |   | C              | S      |            |            |
| <i>Sideritis infernalis</i> Bolle                              | Lamiaceae  | Acc      | Acc  | Acc  | Acc  | Acc  | Acc  | Acc | 1        |   |   |   | 1 |   |   |   | T              | S      |            |            |
| <i>Sideritis kuegleriana</i> Bornm.                            | Lamiaceae  | Acc      | Acc  | Acc  | Acc  | Acc  | Acc  | NL  | 1        |   |   |   | 1 |   |   |   | T              | S      |            |            |
| <i>Sideritis lotsyi</i> (Pit.) Ceballos & Ortuño               | Lamiaceae  | Acc      | Acc  | Acc  | Acc  | Acc  | Acc  | Acc | 2        |   |   | 1 |   |   |   |   | G              | S      |            |            |
| <i>Sideritis macrostachyos</i> Poir.                           | Lamiaceae  | Acc      | Acc  | Acc  | Acc  | AmUn | Acc  | NL  | 1        |   |   |   | 1 |   |   |   | T              | S      |            |            |
| <i>Sideritis marmorea</i> Bolle                                | Lamiaceae  | Acc      | Acc  | Acc  | Acc  | Acc  | Acc  | Acc | 1        |   |   | 1 |   |   |   |   | G              | S      |            |            |
| <i>Sideritis mascaensis</i> (Svent.) Marrero Rodr.             | Lamiaceae  | Acc      | Acc  | Acc  | Syn  | NL   | Acc  | NL  | 2        |   |   |   | 1 |   |   |   | T              | S      |            |            |
| <i>Sideritis nervosa</i> (Christ) Linding.                     | Lamiaceae  | Acc      | Acc  | Acc  | Acc  | Acc  | NL   | Acc | 2        |   |   |   | 1 |   |   |   | T              | S      |            |            |
| <i>Sideritis nutans</i> Svent.                                 | Lamiaceae  | Acc      | Acc  | Acc  | Acc  | Acc  | Acc  | Acc | 1        |   |   | 1 |   |   |   |   | G              | S      |            |            |
| <i>Sideritis oroteneriffae</i> Negrín & P.Pérez                | Lamiaceae  | Acc      | NL   | Acc  | Acc  | Acc  | Acc  | Acc | 1        |   |   |   | 1 |   |   |   | T              | S      |            |            |
| <i>Sideritis pumila</i> (Christ) Mendoza-Heuer                 | Lamiaceae  | Acc      | Acc  | Acc  | Acc  | Acc  | Acc  | Acc | 1        |   |   |   |   |   | 1 | 1 | A              | S      |            |            |
| <i>Sideritis santosii</i> Marrero Rodr.                        | Lamiaceae  | Acc      | Acc  | Acc  | NL   | AmUn | Acc  | NL  | 0        |   |   |   | 1 |   |   |   | T              | S      |            |            |
| <i>Sideritis soluta</i> Clos                                   | Lamiaceae  | Acc      | NL   | Acc  | Acc  | Acc  | Acc  | Acc | 2        |   |   |   | 1 |   |   |   | T              | S      |            |            |
| <i>Sideritis sventenii</i> (G.Kunkel) Mend.-Heuer              | Lamiaceae  | Acc      | Acc  | Acc  | Acc  | Acc  | Acc  | Acc | 1        |   |   |   |   | 1 |   |   | C              | S      |            |            |
| <i>Sideroxylon canariense</i> Leyens, Lobin & A.Santos         | Sapotaceae | Acc      | Acc  | Acc  | Acc  | Acc  | Acc  | Acc | 0        | 1 | 1 | 1 | 1 | 1 | 1 |   | A              | S      |            |            |

| Species Name                                | Family          | Atlantis | Muer | POWO | WFO  | COL  | GBIF | TRY | POWO Syn | H | P | G | T | C | F | L | Endemic Status | Native | Non native | Ornam Crop |
|---------------------------------------------|-----------------|----------|------|------|------|------|------|-----|----------|---|---|---|---|---|---|---|----------------|--------|------------|------------|
| <i>Sigesbeckia orientalis</i> L.            | Asteraceae      | Acc      | Acc  | Acc  | Acc  | Acc  | Acc  | Acc | 13       |   | 1 |   | 1 |   |   |   |                |        | S          |            |
| <i>Silene apetala</i> Willd.                | Caryophyllaceae | Acc      | Acc  | Acc  | Acc  | Acc  | Acc  | Acc | 20       | 1 | 1 | 1 | 1 | 1 | 1 | 1 |                | P      |            |            |
| <i>Silene behen</i> L.                      | Caryophyllaceae | Acc      | Acc  | Acc  | Acc  | Acc  | Acc  | Acc | 8        |   |   |   | 1 | 1 | 1 | 1 |                | P      |            |            |
| <i>Silene bellidifolia</i> Juss. ex Jacq.   | Caryophyllaceae | NL       | NL   | Acc  | Acc  | Acc  | Acc  | Acc | 12       |   |   |   | 1 |   |   | 1 |                | P      |            |            |
| <i>Silene berthelotiana</i> Webb ex Christ  | Caryophyllaceae | Acc      | Acc  | Acc  | AmUn | Acc  | Acc  | Acc | 0        | 1 |   |   | 1 |   |   |   | A              | S      |            |            |
| <i>Silene bourgaei</i> Webb ex Christ       | Caryophyllaceae | Acc      | Acc  | Acc  | AmUn | AmUn | Acc  | Syn | 0        |   |   | 1 |   |   |   |   | G              | S      |            |            |
| <i>Silene canariensis</i> Spreng.           | Caryophyllaceae | Acc      | NL   | Acc  | AmUn | AmUn | Acc  | NL  | 0        |   |   |   | 1 | 1 |   |   | A              | S      |            |            |
| <i>Silene colorata</i> Poir.                | Caryophyllaceae | Acc      | Acc  | Acc  | Acc  | Acc  | Acc  | Acc | 21       |   |   |   |   |   | 1 | 1 |                | P      |            |            |
| <i>Silene conica</i> L.                     | Caryophyllaceae | Acc      | Acc  | Acc  | Acc  | Acc  | Acc  | Acc | 7        |   |   |   |   | 1 |   |   |                | P      |            |            |
| <i>Silene conoidea</i> L.                   | Caryophyllaceae | Acc      | Acc  | Acc  | Acc  | Acc  | Acc  | Acc | 8        |   |   |   | 1 |   |   |   |                | P      |            |            |
| <i>Silene cretica</i> L.                    | Caryophyllaceae | Acc      | Acc  | Acc  | Acc  | Acc  | Acc  | Acc | 13       |   |   | 1 | 1 | 1 |   |   |                | P      |            |            |
| <i>Silene diversifolia</i> Otth             | Caryophyllaceae | NL       | Syn  | Acc  | Acc  | Syn  | Syn  | Acc | 2        |   |   |   |   |   |   | 1 |                | P      |            |            |
| <i>Silene gallica</i> L.                    | Caryophyllaceae | Acc      | Acc  | Acc  | Acc  | Acc  | Acc  | Acc | 68       | 1 | 1 | 1 | 1 | 1 | 1 | 1 |                | P      |            |            |
| <i>Silene gracilis</i> DC.                  | Caryophyllaceae | Acc      | Acc  | Acc  | AmUn | Acc  | Acc  | NL  | 2        |   |   |   |   |   | 1 | 1 |                | P      |            |            |
| <i>Silene inaperta</i> L.                   | Caryophyllaceae | Acc      | Acc  | Acc  | Acc  | Acc  | Acc  | Acc | 8        |   |   |   | 1 | 1 |   |   |                | P      |            |            |
| <i>Silene lagunensis</i> C.Sm. ex Link      | Caryophyllaceae | Acc      | Acc  | Acc  | AmUn | Acc  | Acc  | Acc | 0        |   |   |   | 1 |   |   |   | T              | S      |            |            |
| <i>Silene muscipula</i> L.                  | Caryophyllaceae | Acc      | Acc  | Acc  | Acc  | Acc  | Acc  | Acc | 9        |   |   |   |   |   | 1 |   |                | P      |            |            |
| <i>Silene nocteolens</i> Webb & Berthel.    | Caryophyllaceae | Acc      | Acc  | Acc  | AmUn | Acc  | Acc  | Syn | 0        |   |   |   | 1 |   |   |   | T              | S      |            |            |
| <i>Silene nocturna</i> L.                   | Caryophyllaceae | Acc      | Acc  | Acc  | Acc  | Acc  | Acc  | Acc | 18       |   | 1 | 1 | 1 | 1 | 1 | 1 |                | P      |            |            |
| <i>Silene nutans</i> L.                     | Caryophyllaceae | Acc      | Acc  | Acc  | Acc  | Acc  | Acc  | Acc | 29       | 1 | 1 | 1 | 1 |   |   |   |                | P      |            |            |
| <i>Silene pogonocalyx</i> (Svent.) Bramwell | Caryophyllaceae | Acc      | Acc  | Acc  | AmUn | Acc  | Acc  | NL  | 1        | 1 | 1 |   |   |   |   |   | A              | S      |            |            |
| <i>Silene rubella</i> L.                    | Caryophyllaceae | Acc      | Syn  | Acc  | Acc  | Acc  | Acc  | Acc | 9        |   |   |   |   |   |   | 1 |                | P      |            |            |
| <i>Silene sabinosae</i> Pit.                | Caryophyllaceae | Acc      | Acc  | Acc  | AmUn | Acc  | Acc  | NL  | 0        | 1 |   |   |   |   |   |   | H              | S      |            |            |
| <i>Silene tamaranae</i> Bramwell            | Caryophyllaceae | Acc      | Acc  | Acc  | AmUn | Acc  | Acc  | NL  | 0        |   |   |   |   | 1 |   |   | C              | S      |            |            |

| Species Name                                              | Family          | Atlantis | Muer | POWO | WFO | COL | GBIF | TRY | POWO Syn | H | P | G | T | C | F | L | Endemic Status | Native | Non native | Ornam Crop |
|-----------------------------------------------------------|-----------------|----------|------|------|-----|-----|------|-----|----------|---|---|---|---|---|---|---|----------------|--------|------------|------------|
| <i>Silene tridentata</i> Desf.                            | Caryophyllaceae | Acc      | Acc  | Acc  | Acc | Acc | Acc  | Acc | 2        |   |   | 1 | 1 | 1 | 1 | 1 |                | P      |            |            |
| <i>Silene vulgaris</i> (Moench) Garcke                    | Caryophyllaceae | Acc      | Acc  | Acc  | Acc | Acc | Acc  | Acc | 101      | 1 | 1 | 1 | 1 | 1 | 1 | 1 |                | P      |            |            |
| <i>Silybum marianum</i> (L.) Gaertn.                      | Asteraceae      | Acc      | Acc  | Acc  | Acc | Acc | Acc  | Acc | 16       | 1 | 1 | 1 | 1 | 1 | 1 | 1 |                | P      |            |            |
| <i>Simmondsia chinensis</i> (Link) C.K. Schneid.          | Simmondsiaceae  | Acc      | Acc  | Acc  | Acc | Acc | Acc  | Acc | 6        |   |   |   |   |   |   | 1 |                |        | S          |            |
| <i>Sinapis alba</i> L.                                    | Brassicaceae    | Acc      | Acc  | Acc  | Acc | Acc | Acc  | Acc | 11       | 1 | 1 | 1 | 1 | 1 | 1 | 1 |                | P      |            | C          |
| <i>Sinapis arvensis</i> L.                                | Brassicaceae    | Acc      | Acc  | Acc  | Acc | Acc | Acc  | Acc | 36       | 1 | 1 | 1 | 1 | 1 | 1 | 1 |                | P      |            |            |
| <i>Sinapis flexuosa</i> Poir.                             | Brassicaceae    | Acc      | Acc  | Acc  | Acc | Acc | Acc  | Acc | 3        |   |   | 1 | 1 |   | 1 |   |                |        | P          |            |
| <i>Sinapis pubescens</i> L.                               | Brassicaceae    | Acc      | NL   | Acc  | Acc | Acc | Acc  | Acc | 6        | 1 | 1 |   |   |   |   |   |                | P      |            |            |
| <i>Sisymbrium erysimoides</i> Desf.                       | Brassicaceae    | Acc      | Acc  | Acc  | Acc | Acc | Acc  | Acc | 10       | 1 | 1 | 1 | 1 | 1 | 1 | 1 |                | P      |            |            |
| <i>Sisymbrium irio</i> L.                                 | Brassicaceae    | Acc      | Acc  | Acc  | Acc | Acc | Acc  | Acc | 20       | 1 | 1 | 1 | 1 | 1 | 1 | 1 |                | P      |            |            |
| <i>Sisymbrium officinale</i> (L.) Scop.                   | Brassicaceae    | Acc      | Acc  | Acc  | Acc | Acc | Acc  | Acc | 21       | 1 | 1 | 1 | 1 | 1 | 1 | 1 |                |        | P          |            |
| <i>Sisymbrium orientale</i> L.                            | Brassicaceae    | Acc      | Acc  | Acc  | Acc | Acc | Acc  | Acc | 21       |   | 1 |   | 1 | 1 |   |   |                |        | P          |            |
| <i>Smilax aspera</i> L.                                   | Smilacaceae     | Acc      | Acc  | Acc  | Acc | Acc | Acc  | Acc | 27       | 1 | 1 | 1 | 1 | 1 | 1 |   |                | S      |            |            |
| <i>Smilax canariensis</i> Willd.                          | Smilacaceae     | Acc      | Acc  | Acc  | Acc | Acc | Acc  | Acc | 2        |   | 1 | 1 | 1 | 1 |   |   |                | S      |            |            |
| <i>Smyrnum olusatrum</i> L.                               | Apiaceae        | Acc      | Acc  | Acc  | Acc | Acc | Acc  | Acc | 2        | 1 |   |   | 1 | 1 |   |   |                |        | S          |            |
| <i>Solandra grandiflora</i> Sw.                           | Solanaceae      | NL       | Acc  | Acc  | Acc | Acc | Acc  | Acc | 8        |   | 1 | 1 | 1 | 1 | 1 |   |                |        | S          | O          |
| <i>Solandra maxima</i> (Moc. & Sessé ex Dunal) P.S. Green | Solanaceae      | Acc      | NL   | Acc  | Acc | Acc | Acc  | Acc | 2        |   | 1 | 1 | 1 | 1 | 1 | 1 |                |        | S          | O          |
| <i>Solanum abutiloides</i> (Griseb.) Bitter & Lillo       | Solanaceae      | Acc      | Acc  | Acc  | Acc | Acc | Acc  | Acc | 2        |   | 1 |   | 1 |   |   |   |                |        | S          |            |
| <i>Solanum alatum</i> Moench                              | Solanaceae      | NL       | Acc  | Acc  | Syn | Syn | Acc  | NL  | 6        |   | 1 |   |   |   |   |   |                |        | S          |            |
| <i>Solanum americanum</i> Mill.                           | Solanaceae      | Acc      | Acc  | Acc  | Acc | Acc | Acc  | Acc | 51       |   |   |   |   | 1 |   |   |                |        | S          |            |
| <i>Solanum betaceum</i> Cav.                              | Solanaceae      | NL       | NL   | Acc  | Acc | Acc | Acc  | Acc | 7        |   |   |   | 1 | 1 |   |   |                |        | S          |            |
| <i>Solanum bonariense</i> L.                              | Solanaceae      | Acc      | Acc  | Acc  | Acc | Acc | Acc  | Acc | 10       |   | 1 |   | 1 | 1 |   |   |                |        | S          |            |
| <i>Solanum chenopodioides</i> Lam.                        | Solanaceae      | Acc      | Acc  | Acc  | Acc | Acc | Acc  | Acc | 18       |   | 1 | 1 | 1 | 1 |   |   |                |        | S          |            |
| <i>Solanum chrysotrichum</i> Schtdl.                      | Solanaceae      | Acc      | Acc  | Acc  | Acc | Acc | Acc  | Acc | 5        |   |   |   |   | 1 |   |   |                |        | S          |            |

| Species Name                                     | Family      | Atlantis | Muer | POWO | WFO | COL | GBIF | TRY | POWO Syn | H | P | G | T | C | F | L | Endemic Status | Native | Non native | Ornam Crop |
|--------------------------------------------------|-------------|----------|------|------|-----|-----|------|-----|----------|---|---|---|---|---|---|---|----------------|--------|------------|------------|
| <i>Solanum decipiens</i> Opiz                    | Solanaceae  | NL       | NL   | Syn  | Syn | Acc | Acc  | Acc |          |   | 1 |   |   |   |   |   |                |        | S          |            |
| <i>Solanum giganteum</i> Jacq.                   | Solanaceae  | Acc      | Acc  | Acc  | Acc | Acc | Acc  | Acc | 11       |   |   |   |   | 1 |   |   |                |        | S          |            |
| <i>Solanum hoehnei</i> C.V.Morton                | Solanaceae  | NL       | Syn  | Acc  | Acc | Acc | Acc  | Acc | 3        | 1 |   |   | 1 | 1 |   | 1 |                | P      |            |            |
| <i>Solanum laxum</i> Spreng.                     | Solanaceae  | Acc      | Acc  | Acc  | Acc | Acc | Acc  | Acc | 11       |   |   |   | 1 | 1 |   |   |                |        | S          |            |
| <i>Solanum lidii</i> Sundig                      | Solanaceae  | Acc      | Acc  | Acc  | Acc | Acc | Acc  | Acc | 0        |   |   |   |   | 1 |   |   | C              | S      |            |            |
| <i>Solanum lycopersicum</i> L.                   | Solanaceae  | Acc      | Acc  | Acc  | Acc | Acc | Acc  | Acc | 65       | 1 | 1 | 1 | 1 | 1 | 1 | 1 |                |        | S          |            |
| <i>Solanum marginatum</i> L.f.                   | Solanaceae  | Acc      | Acc  | Acc  | Acc | Acc | Acc  | Acc | 5        |   |   |   | 1 | 1 |   |   |                |        | S          |            |
| <i>Solanum mauritianum</i> Scop.                 | Solanaceae  | Acc      | Acc  | Acc  | Acc | Acc | Acc  | Acc | 7        |   | 1 |   | 1 |   |   |   |                |        | S          |            |
| <i>Solanum nava</i> Webb & Berthel.              | Solanaceae  | Syn      | Acc  | Acc  | Acc | Acc | Acc  | Syn | 2        |   |   |   | 1 | 1 |   |   | A              | S      |            |            |
| <i>Solanum nigrum</i> L.                         | Solanaceae  | Acc      | Acc  | Acc  | Acc | Acc | Acc  | Acc | 58       |   | 1 | 1 | 1 | 1 | 1 | 1 |                | P      |            |            |
| <i>Solanum pseudocapsicum</i> L.                 | Solanaceae  | Acc      | Acc  | Acc  | Acc | Acc | Acc  | Acc | 40       | 1 | 1 | 1 | 1 | 1 |   |   |                |        | S          |            |
| <i>Solanum robustum</i> H.L. Wendl.              | Solanaceae  | Acc      | Acc  | Acc  | Acc | Acc | Acc  | Acc | 10       |   |   |   | 1 | 1 |   |   |                |        | S          |            |
| <i>Solanum seaforthianum</i> Andrews             | Solanaceae  | NL       | NL   | Acc  | Acc | Acc | Acc  | Acc | 9        |   | 1 |   |   | 1 |   |   |                |        | S          |            |
| <i>Solanum tuberosum</i> L.                      | Solanaceae  | Acc      | Acc  | Acc  | Acc | Acc | Acc  | Acc | 362      |   |   | 1 | 1 | 1 | 1 | 1 |                |        | S          | C          |
| <i>Solanum vespertilio</i> Aiton                 | Solanaceae  | Acc      | Acc  | Acc  | Acc | Acc | Acc  | Acc | 0        |   |   |   | 1 |   |   |   | T              | S      |            |            |
| <i>Solanum villosum</i> Mill.                    | Solanaceae  | Acc      | Acc  | Acc  | Acc | Acc | Acc  | Acc | 44       | 1 | 1 | 1 | 1 | 1 | 1 | 1 |                | P      |            |            |
| <i>Soleirolia soleirolia</i> (Req.) Dandy        | Urticaceae  | Acc      | Acc  | Acc  | Acc | Acc | Acc  | Acc | 6        |   |   |   | 1 | 1 |   |   |                |        | S          | O          |
| <i>Solenopsis laurentia</i> (L.) C.Presl         | Lobeliaceae | Acc      | Acc  | Acc  | Acc | Acc | Acc  | Acc | 9        |   |   |   | 1 | 1 |   |   |                | P      |            |            |
| <i>Soliva stolonifera</i> (Brot.) R.Br. ex G.Don | Asteraceae  | Acc      | Acc  | Acc  | Acc | Acc | Acc  | Acc | 9        | 1 | 1 | 1 | 1 | 1 |   |   |                |        | S          |            |
| <i>Sonchus acaulis</i> Dum.Cours                 | Asteraceae  | Acc      | Acc  | Acc  | Acc | Acc | Acc  | Acc | 5        |   |   |   | 1 | 1 |   |   | A              | S      |            |            |
| <i>Sonchus arboreus</i> DC.                      | Asteraceae  | Acc      | Acc  | Acc  | Acc | Acc | Acc  | Acc | 3        |   | 1 |   | 1 |   |   |   | A              | S      |            |            |
| <i>Sonchus asper</i> (L.) Hill                   | Asteraceae  | Acc      | Acc  | Acc  | Acc | Acc | Acc  | Acc | 25       |   | 1 | 1 | 1 | 1 |   | 1 |                | P      |            |            |
| <i>Sonchus bornmuelleri</i> Pit.                 | Asteraceae  | Acc      | Acc  | Acc  | Acc | Acc | Acc  | Acc | 0        |   | 1 |   |   |   |   |   | P              | S      |            |            |
| <i>Sonchus bourgeauii</i> Sch.Bip.               | Asteraceae  | Acc      | Acc  | Acc  | Acc | Acc | Acc  | Acc | 1        |   |   |   |   | 1 | 1 | 1 |                | S      |            |            |



| Species Name                                                | Family     | Atlantis | Muer | POWO | WFO | COL | GBIF | TRY | POWO Syn | H | P | G | T | C | F | L | Endemic Status | Native | Non native | Ornam Crop |
|-------------------------------------------------------------|------------|----------|------|------|-----|-----|------|-----|----------|---|---|---|---|---|---|---|----------------|--------|------------|------------|
| <i>Sonchus brachylobus</i> Webb & Berthel.                  | Asteraceae | Acc      | Acc  | Acc  | Acc | Acc | Acc  | Acc | 3        |   |   |   |   | 1 |   |   | C              | S      |            |            |
| <i>Sonchus bupleuroides</i> (Font Quer) N.Kilian & Greuter  | Asteraceae | Syn      | Syn  | Acc  | Acc | Acc | Acc  | Acc | 1        |   |   |   |   | 1 |   |   | C              | S      |            |            |
| <i>Sonchus canariensis</i> (Sch.Bip.) Boulos                | Asteraceae | Acc      | Acc  | Acc  | Acc | Acc | Acc  | Acc | 1        |   |   |   | 1 | 1 |   |   | A              | S      |            |            |
| <i>Sonchus capillaris</i> Svent.                            | Asteraceae | Acc      | Acc  | Acc  | Acc | Acc | Acc  | Acc | 3        |   |   | 1 | 1 | 1 |   |   | A              | S      |            |            |
| <i>Sonchus congestus</i> Willd.                             | Asteraceae | Acc      | Acc  | Acc  | Acc | Acc | Acc  | Acc | 9        |   |   |   | 1 | 1 |   |   | A              | S      |            |            |
| <i>Sonchus esperanzae</i> N.Kilian & Greuter                | Asteraceae | Syn      | Acc  | Acc  | Acc | Acc | Acc  | NL  | 3        |   | 1 |   |   |   |   |   | P              | S      |            |            |
| <i>Sonchus fauces-orci</i> Knoche                           | Asteraceae | Acc      | Acc  | Acc  | Acc | Acc | Acc  | NL  | 0        |   |   |   | 1 |   |   |   | T              | S      |            |            |
| <i>Sonchus gandogerii</i> Pit.                              | Asteraceae | Acc      | Acc  | Acc  | Acc | Acc | Acc  | Acc | 0        | 1 |   |   |   |   |   |   | H              | S      |            |            |
| <i>Sonchus gomeraensis</i> Boulos                           | Asteraceae | Acc      | Acc  | Acc  | Acc | Acc | Acc  | Syn | 1        |   |   | 1 |   |   |   |   | G              | S      |            |            |
| <i>Sonchus gummifer</i> Link                                | Asteraceae | Acc      | Acc  | Acc  | Acc | Acc | Acc  | NL  | 1        |   |   |   | 1 |   |   |   | T              | S      |            |            |
| <i>Sonchus hierrensis</i> (Pit.) Boulos                     | Asteraceae | Acc      | Acc  | Acc  | Acc | Acc | Acc  | Acc | 1        | 1 | 1 | 1 |   |   |   |   | A              | S      |            |            |
| <i>Sonchus leptocephalus</i> Cass.                          | Asteraceae | Acc      | Acc  | Acc  | Acc | Acc | Acc  | Acc | 4        |   |   | 1 | 1 | 1 | 1 |   | A              | S      |            |            |
| <i>Sonchus lidii</i> Boulos                                 | Asteraceae | Acc      | Acc  | Acc  | Acc | Acc | Acc  | NL  | 0        | 1 |   |   |   |   |   |   | H              | S      |            |            |
| <i>Sonchus microcarpus</i> (Boulos) U.Reifenb. & A.Reifenb. | Asteraceae | Acc      | Acc  | Acc  | Acc | Acc | Acc  | Acc | 2        |   |   |   | 1 |   |   |   | T              | S      |            |            |
| <i>Sonchus oleraceus</i> (L.) L.                            | Asteraceae | Acc      | Acc  | Acc  | Acc | Acc | Acc  | Acc | 36       | 1 | 1 | 1 | 1 | 1 | 1 | 1 |                | P      |            |            |
| <i>Sonchus ortunoii</i> Svent.                              | Asteraceae | Acc      | Acc  | Acc  | Acc | Acc | Acc  | Acc | 0        |   |   | 1 |   |   |   |   | G              | S      |            |            |
| <i>Sonchus palmensis</i> Boulos                             | Asteraceae | Acc      | Acc  | Acc  | Acc | Acc | Acc  | Acc | 2        |   | 1 |   |   |   |   |   | P              | S      |            |            |
| <i>Sonchus pendulus</i> (Sch.Bip.) Sennikov                 | Asteraceae | Syn      | NL   | Acc  | Acc | Acc | Acc  | Acc | 2        |   |   |   |   | 1 |   |   | C              | S      |            |            |
| <i>Sonchus pinnatifidus</i> Cav.                            | Asteraceae | Acc      | Acc  | Acc  | Acc | Acc | Acc  | Acc | 4        |   |   |   |   |   | 1 | 1 |                | S      |            |            |
| <i>Sonchus pitardii</i> Boulos                              | Asteraceae | Acc      | Syn  | Acc  | Acc | Acc | Acc  | NL  | 0        | 1 |   |   |   |   |   |   | H              | S      |            |            |
| <i>Sonchus platylepis</i> Webb                              | Asteraceae | Syn      | Syn  | Acc  | Acc | Acc | Acc  | Acc | 3        |   |   |   |   | 1 |   |   | C              | S      |            |            |
| <i>Sonchus radicans</i> Aiton                               | Asteraceae | Acc      | Acc  | Acc  | Acc | Acc | Acc  | Acc | 0        |   |   |   | 1 |   |   |   | T              | S      |            |            |
| <i>Sonchus regis-jubae</i> Pit.                             | Asteraceae | Acc      | Acc  | Acc  | Acc | Acc | Acc  | NL  | 2        |   | 1 | 1 | 1 | 1 |   |   | A              | S      |            |            |

| Species Name                                           | Family          | Atlantis | Muer | POWO | WFO | COL  | GBIF | TRY | POWO Syn | H | P | G | T | C | F | L | Endemic Status | Native | Non native | Ornam Crop |
|--------------------------------------------------------|-----------------|----------|------|------|-----|------|------|-----|----------|---|---|---|---|---|---|---|----------------|--------|------------|------------|
| <i>Sonchus sventenii</i> U.Reifenb. & A.Reifenb.       | Asteraceae      | Acc      | Acc  | Acc  | Acc | Acc  | Acc  | Acc | 4        |   |   | 1 |   |   |   |   | G              | S      |            |            |
| <i>Sonchus tectifolius</i> Svent.                      | Asteraceae      | Acc      | Acc  | Acc  | Acc | Acc  | Acc  | Acc | 1        |   |   |   | 1 |   |   |   | T              | S      |            |            |
| <i>Sonchus tenerrimus</i> L.                           | Asteraceae      | Acc      | Acc  | Acc  | Acc | Acc  | Acc  | Acc | 1        | 1 | 1 | 1 | 1 | 1 | 1 | 1 |                | P      |            |            |
| <i>Sonchus tuberifer</i> Svent.                        | Asteraceae      | Acc      | Acc  | Acc  | Acc | Acc  | Acc  | Acc | 0        |   |   |   | 1 |   |   |   | T              | S      |            |            |
| <i>Sonchus webbii</i> Sch.Bip.                         | Asteraceae      | Syn      | Acc  | Acc  | Acc | Acc  | Acc  | Acc | 3        |   | 1 |   |   |   |   |   | P              | S      |            |            |
| <i>Sonchus wildpretii</i> U.Reifenb. & A.Reifenb.      | Asteraceae      | Acc      | Acc  | Acc  | Acc | Acc  | Acc  | Acc | 0        |   |   | 1 |   |   |   |   | G              | S      |            |            |
| <i>Sorghum bicolor</i> (L.) Moench.                    | Poaceae         | Acc      | Acc  | Acc  | Acc | Acc  | Acc  | Acc | 177      |   | 1 | 1 |   | 1 |   |   |                |        | P          | C          |
| <i>Sorghum halepense</i> (L.) Pers.                    | Poaceae         | Acc      | Acc  | Acc  | Acc | Acc  | Acc  | Acc | 34       | 1 | 1 | 1 | 1 | 1 | 1 | 1 |                |        | S          | C          |
| <i>Spartium junceum</i> L.                             | Fabaceae        | Acc      | Acc  | Acc  | Acc | Acc  | Acc  | Acc | 14       | 1 | 1 | 1 | 1 | 1 |   |   |                |        | I          | O          |
| <i>Spathodea campanulata</i> P.Beauv.                  | Bignoniaceae    | NL       | NL   | Acc  | Acc | Acc  | Acc  | Acc | 3        |   | 1 | 1 | 1 |   | 1 | 1 |                |        | S          | O          |
| <i>Spergula arvensis</i> L.                            | Caryophyllaceae | Acc      | Acc  | Acc  | Acc | Acc  | Acc  | Acc | 21       | 1 | 1 | 1 | 1 | 1 | 1 | 1 |                | P      |            |            |
| <i>Spergula pentandra</i> L.                           | Caryophyllaceae | Acc      | Acc  | Acc  | Acc | Acc  | Acc  | Acc | 7        | 1 | 1 |   | 1 | 1 |   |   |                | P      |            |            |
| <i>Spergularia bocconeii</i> (Scheele) Asch. & Graebn. | Caryophyllaceae | Acc      | Acc  | Acc  | Acc | Acc  | Acc  | Acc | 13       | 1 | 1 | 1 | 1 | 1 | 1 | 1 |                | P      |            |            |
| <i>Spergularia bourgaei</i> Lebel                      | Caryophyllaceae | Acc      | NL   | Acc  | Acc | AmUn | Acc  | NL  | 1        |   |   |   | 1 |   |   |   | T              | S      |            |            |
| <i>Spergularia diandra</i> (Guss.) Heldr.              | Caryophyllaceae | Acc      | Acc  | Acc  | Acc | Acc  | Acc  | Acc | 24       |   |   |   |   | 1 | 1 | 1 |                | P      |            |            |
| <i>Spergularia fimbriata</i> Boiss. & Reut.            | Caryophyllaceae | Acc      | Acc  | Acc  | Acc | Acc  | Acc  | NL  | 3        |   |   |   | 1 | 1 | 1 | 1 |                | P      |            |            |
| <i>Spergularia flaccida</i> (Madden) I.M.Turner        | Caryophyllaceae | Syn      | Syn  | Acc  | Syn | Acc  | Acc  | Syn | 9        | 1 |   | 1 | 1 | 1 | 1 | 1 |                | P      |            |            |
| <i>Spergularia marina</i> (L.) Besser                  | Caryophyllaceae | Acc      | Syn  | Acc  | Acc | Acc  | Acc  | Acc | 76       |   | 1 |   | 1 | 1 | 1 | 1 |                | P      |            |            |
| <i>Spergularia media</i> (L.) C.Presl                  | Caryophyllaceae | Acc      | Acc  | Acc  | Acc | Acc  | Acc  | Acc | 47       |   |   | 1 | 1 | 1 | 1 | 1 |                | P      |            |            |
| <i>Sphenopus divaricatus</i> (Gouan) Rchb.             | Poaceae         | Acc      | Acc  | Acc  | Acc | Acc  | Acc  | Acc | 12       |   |   |   |   |   | 1 |   |                | P      |            |            |
| <i>Spinacia oleracea</i> L.                            | Amaranthaceae   | Acc      | Acc  | Acc  | Acc | Acc  | Acc  | Acc | 9        |   |   |   | 1 | 1 |   |   |                |        | S          | C          |
| <i>Spirobassia hirsuta</i> (L.) Freitag & G. Kadereit  | Amaranthaceae   | Acc      | Acc  | Acc  | Syn | Acc  | Acc  | Syn | 20       |   |   |   |   | 1 |   |   |                |        | P          |            |
| <i>Spirodela punctata</i> (G.Mey.) C.H.Thomps.         | Araceae         | Syn      | NL   | Acc  | Acc | Acc  | Acc  | Acc | 4        |   | 1 |   | 1 |   |   |   |                |        | I          |            |
| <i>Sporobolus africanus</i> (Poir.) Robyns & Tournay   | Poaceae         | Acc      | NL   | Acc  | Acc | Acc  | Acc  | Acc | 11       |   | 1 |   |   |   |   |   |                |        | P          |            |

| Species Name                                         | Family          | Atlantis | Muer | POWO | WFO | COL | GBIF | TRY | POWO Syn | H | P | G | T | C | F | L | Endemic Status | Native | Non native | Ornam Crop |
|------------------------------------------------------|-----------------|----------|------|------|-----|-----|------|-----|----------|---|---|---|---|---|---|---|----------------|--------|------------|------------|
| <i>Sporobolus copei</i> Verloove                     | Poaceae         | Acc      | Acc  | Acc  | Acc | Acc | Acc  | Acc | 0        |   |   |   | 1 |   |   |   | T              | S      |            |            |
| <i>Sporobolus diandrus</i> (Retz.) P.Beauv.          | Poaceae         | Acc      | NL   | Acc  | Acc | Acc | Acc  | Acc | 9        |   |   |   | 1 |   |   |   |                |        | P          |            |
| <i>Sporobolus indicus</i> (L.) R.Br.                 | Poaceae         | Acc      | Acc  | Acc  | Acc | Acc | Acc  | Acc | 23       |   | 1 |   | 1 | 1 |   |   |                |        | P          |            |
| <i>Stachys arvensis</i> (L.) L.                      | Lamiaceae       | Acc      | Acc  | Acc  | Acc | Acc | Acc  | Acc | 13       | 1 | 1 | 1 | 1 | 1 | 1 | 1 |                | P      |            |            |
| <i>Stachys germanica</i> L.                          | Lamiaceae       | Acc      | NL   | Acc  | Acc | Acc | Acc  | Acc | 3        |   |   |   | 1 | 1 |   |   |                | P      |            |            |
| <i>Stachys ocymastrum</i> (L.) Briq.                 | Lamiaceae       | Acc      | Acc  | Acc  | Acc | Acc | Acc  | Acc | 14       | 1 | 1 | 1 | 1 | 1 | 1 | 1 |                | P      |            |            |
| <i>Stellaria apetala</i> Ucria                       | Caryophyllaceae | Syn      | Syn  | Acc  | Syn | Acc | Acc  | Syn | 8        |   | 1 |   |   | 1 |   | 1 |                |        | P          |            |
| <i>Stellaria media</i> (L.) Vill.                    | Caryophyllaceae | Acc      | Acc  | Acc  | Acc | Acc | Acc  | Acc | 59       | 1 | 1 | 1 | 1 | 1 | 1 | 1 |                |        | P          |            |
| <i>Stenocereus dumortieri</i> (Scheidew.) Buxb.      | Cactaceae       | NL       | NL   | Acc  | Syn | Syn | Syn  | Syn | 4        |   |   |   | 1 |   |   |   |                | S      |            | O          |
| <i>Stenocereus pruinosus</i> (Otto ex Pfeiff.) Buxb. | Cactaceae       | NL       | NL   | Acc  | Acc | Acc | Acc  | Acc | 19       |   |   |   | 1 |   |   |   |                | S      |            | O          |
| <i>Stenotaphrum secundatum</i> (Walter) Kuntze       | Poaceae         | Acc      | Acc  | Acc  | Acc | Acc | Acc  | Acc | 10       |   | 1 |   | 1 | 1 | 1 | 1 |                |        | S          |            |
| <i>Stipagrostis ciliata</i> (Desf.) De Winter        | Poaceae         | Acc      | Acc  | Acc  | Acc | Acc | Acc  | Acc | 3        |   | 1 |   |   | 1 | 1 |   |                | P      |            |            |
| <i>Stipellula capensis</i> (Thunb.) Röser & Hamasha  | Poaceae         | Acc      | Acc  | Acc  | Syn | Acc | Acc  | Acc | 8        | 1 | 1 | 1 | 1 | 1 | 1 | 1 |                | P      |            |            |
| <i>Streptosolen jamesonii</i> (Benth.) Miers         | Solanaceae      | NL       | NL   | Acc  | Acc | Acc | Acc  | Acc | 2        |   | 1 |   | 1 | 1 |   |   |                |        | S          |            |
| <i>Suaeda ifniensis</i> Caball. ex Maire             | Amaranthaceae   | Acc      | Acc  | Acc  | Acc | Acc | Acc  | Acc | 0        |   |   |   | 1 |   | 1 | 1 |                | P      |            |            |
| <i>Suaeda maritima</i> (L.) Dumort.                  | Amaranthaceae   | Acc      | Acc  | Acc  | Acc | Acc | Acc  | Acc | 64       |   |   |   | 1 | 1 | 1 | 1 |                | S      |            |            |
| <i>Suaeda spicata</i> (Willd.) Moq.                  | Amaranthaceae   | Acc      | Acc  | Acc  | Acc | Acc | Acc  | Acc | 3        |   |   |   |   |   | 1 |   |                | P      |            |            |
| <i>Suaeda vera</i> Forssk. ex J.F.Gmel.              | Amaranthaceae   | Acc      | Acc  | Acc  | Acc | Acc | Acc  | Acc | 15       |   |   | 1 | 1 | 1 | 1 | 1 |                | S      |            |            |
| <i>Suaeda vermiculata</i> Forssk. ex J.F.Gmel.       | Amaranthaceae   | Acc      | Acc  | Acc  | Acc | Syn | Syn  | Acc | 16       |   |   |   | 1 | 1 | 1 | 1 |                |        | S          |            |
| <i>Succowia balearica</i> (L.) Medik.                | Brassicaceae    | Acc      | NL   | Acc  | Acc | Acc | Acc  | Acc | 4        |   |   |   | 1 |   |   |   |                | P      |            |            |
| <i>Symphyotrichum laeve</i> (L.) Á.Löve & D.Löve     | Asteraceae      | Acc      | Acc  | Acc  | Acc | Acc | Acc  | Acc | 34       |   | 1 |   | 1 |   |   |   |                |        | S          | O          |
| <i>Symphyotrichum lanceolatum</i> (Willd.) G.L.Nesom | Asteraceae      | Acc      | Acc  | Acc  | Acc | Acc | Acc  | Acc | 1        |   |   |   | 1 |   |   |   |                |        | S          | O          |
| <i>Symphyotrichum subulatum</i> (Michx.) G.L.Nesom   | Asteraceae      | NL       | Syn  | Acc  | Syn | Acc | Acc  | NL  | 12       | 1 | 1 | 1 | 1 | 1 | 1 | 1 |                |        | S          | O          |
| <i>Syzygium cumini</i> (L.) Skeels                   | Myrtaceae       | NL       | NL   | Acc  | Acc | Acc | Acc  | Acc | 43       |   | 1 |   |   | 1 |   |   |                |        | S          |            |

| Species Name                                                 | Family       | Atlantis | Muer | POWO | WFO  | COL  | GBIF | TRY | POWO Syn | H | P | G | T | C | F | L | Endemic Status | Native | Non native | Ornam Crop |
|--------------------------------------------------------------|--------------|----------|------|------|------|------|------|-----|----------|---|---|---|---|---|---|---|----------------|--------|------------|------------|
| <i>Syzygium jambos</i> (L.) Alston                           | Myrtaceae    | NL       | NL   | Acc  | Acc  | Acc  | Acc  | Acc | 19       |   | 1 |   | 1 |   |   |   |                |        | S          | O          |
| <i>Taeniatherum caput-medusae</i> (L.) Nevski                | Poaceae      | Acc      | Acc  | Acc  | Acc  | Acc  | Acc  | Acc | 25       |   |   |   | 1 |   |   |   |                | P      |            |            |
| <i>Tagetes erecta</i> L.                                     | Asteraceae   | Syn      | Syn  | Acc  | Acc  | Acc  | Acc  | Acc | 7        | 1 | 1 | 1 | 1 | 1 |   | 1 |                |        | S          | O          |
| <i>Tagetes minuta</i> L.                                     | Asteraceae   | Acc      | Acc  | Acc  | Acc  | Acc  | Acc  | Acc | 6        |   | 1 | 1 | 1 | 1 |   |   |                |        | S          | O          |
| <i>Tamarix africana</i> Poir.                                | Tamaricaceae | Acc      | Acc  | Acc  | Acc  | Acc  | Acc  | Acc | 18       |   |   |   | 1 | 1 | 1 | 1 |                | S      |            |            |
| <i>Tamarix boveana</i> Bunge                                 | Tamaricaceae | Acc      | Acc  | Acc  | Acc  | Acc  | Acc  | Acc | 2        |   |   |   |   |   | 1 |   |                | S      |            |            |
| <i>Tamarix canariensis</i> Willd.                            | Tamaricaceae | Acc      | Acc  | Acc  | Acc  | Acc  | Acc  | Acc | 10       |   | 1 | 1 | 1 | 1 | 1 | 1 |                | S      |            |            |
| <i>Tanacetum parthenium</i> (L.) Sch. Bip.                   | Asteraceae   | Acc      | Acc  | Acc  | Acc  | Acc  | Acc  | Acc | 49       |   | 1 |   | 1 | 1 |   | 1 |                |        | S          |            |
| <i>Tara spinosa</i> (Molina) Britton & Rose                  | Fabaceae     | Syn      | Syn  | Acc  | Syn  | Syn  | Syn  | Syn | 15       |   |   |   | 1 | 1 | 1 |   |                |        | P          | O          |
| <i>Taraxacum canarense</i> Soest                             | Asteraceae   | Acc      | NL   | Acc  | Acc  | Acc  | Acc  | NL  | 0        |   |   | 1 | 1 |   |   |   | A              | S      |            |            |
| <i>Taraxacum degelii</i> G. E. Haglund                       | Asteraceae   | Acc      | NL   | Acc  | Acc  | Acc  | Acc  | Acc | 0        |   | 1 |   |   |   |   |   |                |        | S          |            |
| <i>Taraxacum duplidentifrons</i> Dahlst. ex Johnston         | Asteraceae   | Acc      | NL   | Acc  | Acc  | Acc  | Acc  | Acc | 1        |   | 1 |   |   |   |   |   |                |        | S          |            |
| <i>Taraxacum duriense</i> Soest                              | Asteraceae   | Acc      | NL   | Acc  | Acc  | Acc  | Acc  | NL  | 0        |   |   |   |   | 1 |   |   |                |        | S          |            |
| <i>Taraxacum gelertii</i> Raunk.                             | Asteraceae   | Acc      | NL   | Acc  | Acc  | Acc  | Acc  | Acc | 0        |   |   |   | 1 |   |   |   |                |        | S          |            |
| <i>Taraxacum guanchicum</i> A. Galán, E. Linares & V. Orell. | Asteraceae   | Acc      | NL   | Acc  | NL   | Acc  | Acc  | NL  | 0        |   |   |   | 1 | 1 |   |   | A              | S      |            |            |
| <i>Taraxacum lidianum</i> Soest                              | Asteraceae   | Acc      | NL   | Acc  | Acc  | Acc  | Acc  | NL  | 0        |   | 1 |   |   |   |   |   |                | S      |            |            |
| <i>Taraxacum lucidum</i> Dahlst.                             | Asteraceae   | Acc      | NL   | Acc  | Acc  | Acc  | Acc  | Acc | 0        |   |   |   |   | 1 |   |   |                |        | S          |            |
| <i>Taraxacum officinale</i> F.H.Wigg                         | Asteraceae   | Syn      | Syn  | Acc  | Syn  | AmUn | Acc  | Acc | 9        |   | 1 | 1 | 1 | 1 | 1 | 1 |                |        | P          |            |
| <i>Tecoma stans</i> (L.) Juss. ex Kunth                      | Bignoniaceae | Acc      | Acc  | Acc  | Acc  | Acc  | Acc  | Acc | 3        |   | 1 | 1 | 1 | 1 | 1 | 1 |                |        | S          | O          |
| <i>Tecomaria capensis</i> (Thunb.) Spach                     | Bignoniaceae | Acc      | Acc  | Acc  | Acc  | Syn  | Syn  | Syn | 8        | 1 | 1 |   | 1 | 1 | 1 | 1 |                |        | S          | O          |
| <i>Teline canariensis</i> (L.) Webb & Berthel.               | Fabaceae     | Acc      | Acc  | Syn  | Syn  | Syn  | Acc  | Syn | 22       |   |   |   | 1 | 1 |   |   | A              | S      |            |            |
| <i>Teline microphylla</i> P.E.Gibbs & Dingwall               | Fabaceae     | Acc      | Acc  | Syn  | Syn  | Acc  | Acc  | Syn | 4        |   |   |   |   | 1 |   |   | C              | S      |            |            |
| <i>Teline nervosa</i> (Esteve) Hansen & Sund.                | Fabaceae     | Acc      | Acc  | Syn  | AmUn | NL   | Acc  | Syn | 1        |   |   |   |   | 1 |   |   | C              | S      |            |            |
| <i>Teline osyrioides</i> (Svent.) P.E.Gibbs & Ding           | Fabaceae     | Acc      | Acc  | Syn  | AmUn | NL   | Acc  | Acc | 1        |   |   |   | 1 |   |   |   | T              | S      |            |            |

| Species Name                                                  | Family           | Atlantis | Muer | POWO | WFO  | COL | GBIF | TRY | POWO Syn | H | P | G | T | C | F | L | Endemic Status | Native | Non native | Ornam Crop |
|---------------------------------------------------------------|------------------|----------|------|------|------|-----|------|-----|----------|---|---|---|---|---|---|---|----------------|--------|------------|------------|
| <i>Teline pallida</i> (Poir.) G. Kunkel                       | Fabaceae         | Acc      | NL   | Syn  | Syn  | Syn | Syn  | NL  | 0        |   |   | 1 | 1 |   |   |   | A              | S      |            |            |
| <i>Teline rosmarinifolia</i> Webb & Berthel.                  | Fabaceae         | Acc      | Acc  | Syn  | Syn  | Syn | Acc  | NL  |          |   |   |   |   | 1 |   |   | C              | S      |            |            |
| <i>Teline salsoloides</i> del Acro & Acebes                   | Fabaceae         | Acc      | Acc  | AmUn | AmUn | NL  | Acc  | NL  | 0        |   |   |   | 1 |   |   |   | T              | S      |            |            |
| <i>Teline splendens</i> (Webb & Berthel.) del Arco            | Fabaceae         | Acc      | Acc  | Syn  | AmUn | Syn | Acc  | NL  | 1        |   | 1 |   |   |   |   |   | P              | S      |            |            |
| <i>Teline stenopetala</i> (Webb & Berthel.) Webb & Berthel.   | Fabaceae         | Acc      | Acc  | Syn  | Syn  | NL  | Acc  | Syn | 4        | 1 | 1 | 1 | 1 | 1 |   |   |                | S      |            |            |
| <i>Tephrocactus articulatus</i> (Pfeiff.) Backeb.             | Cactaceae        | Acc      | NL   | Acc  | Syn  | Syn | Acc  | Acc | 45       |   |   |   | 1 |   |   |   |                |        | S          | O          |
| <i>Tetraclinis articulata</i> (Vahl) Mast.                    | Cupressaceae     | Acc      | Acc  | Acc  | Acc  | Acc | Acc  | Acc | 8        |   |   |   |   | 1 |   |   |                |        | S          | O          |
| <i>Tetragonia echinata</i> Aiton                              | Aizoaceae        | Acc      | Acc  | Acc  | Acc  | Acc | Acc  | Acc | 0        |   |   |   |   | 1 |   |   |                |        | S          |            |
| <i>Tetragonia tetragonoides</i> (Pall.) Kuntze                | Aizoaceae        | Acc      | Acc  | Acc  | Acc  | Acc | Acc  | Acc | 11       | 1 | 1 | 1 | 1 | 1 |   |   |                |        | S          |            |
| <i>Tetrapogon villosus</i> Desf.                              | Poaceae          | Acc      | Acc  | Acc  | Acc  | Acc | Acc  | Acc | 2        |   |   | 1 | 1 | 1 | 1 | 1 |                | P      |            |            |
| <i>Teucrium heterophyllum</i> L'Hér                           | Lamiaceae        | Acc      | Acc  | Acc  | Acc  | Acc | Acc  | Acc | 1        |   | 1 | 1 | 1 | 1 |   |   |                | S      |            |            |
| <i>Teucrium spinosum</i> L.                                   | Lamiaceae        | Acc      | Acc  | Acc  | Acc  | Acc | Acc  | Acc | 4        |   |   |   | 1 | 1 |   |   |                |        | S          |            |
| <i>Theligonum cynocrambe</i> L.                               | Rubiaceae        | Acc      | Acc  | Acc  | Acc  | Acc | Acc  | Acc | 6        |   | 1 | 1 | 1 | 1 |   |   |                | P      |            |            |
| <i>Thelocactus hastifer</i> (Werderm. et Boed.) F.M.Knuth     | Cactaceae        | NL       | NL   | Acc  | Acc  | Acc | Acc  | NL  | 2        |   |   |   | 1 |   |   |   |                |        | S          | O          |
| <i>Thelypteris dentata</i> (Forssk.) E.P.St.John              | Thelypteridaceae | Syn      | Syn  | Acc  | Syn  | Acc | Syn  | Syn | 62       |   | 1 | 1 | 1 | 1 |   |   |                | S      |            |            |
| <i>Thesium canariensis</i> (Stearn) J.C.Manning & F.Forest    | Santalaceae      | Syn      | Syn  | Acc  | Syn  | Acc | Acc  | Syn | 1        |   |   |   |   | 1 |   |   | C              | S      |            |            |
| <i>Thesium humile</i> Vahl.                                   | Santalaceae      | Acc      | Acc  | Acc  | Acc  | Acc | Acc  | Acc | 5        |   | 1 | 1 | 1 | 1 | 1 | 1 |                | P      |            |            |
| <i>Thesium psilotocladum</i> Svent.                           | Santalaceae      | Syn      | Syn  | Acc  | AmUn | Acc | Acc  | NL  | 1        |   |   |   | 1 |   |   |   | T              | S      |            |            |
| <i>Thesium retamoides</i> (A.Santos) J.C.Manning & F.Forest   | Santalaceae      | Syn      | Syn  | Acc  | Syn  | Acc | Acc  | Syn | 1        |   | 1 |   | 1 |   |   |   | A              | S      |            |            |
| <i>Thesium subsucculentum</i> (Kämmer) J.C.Manning & F.Forest | Santalaceae      | Syn      | Syn  | Acc  | Syn  | Acc | Acc  | Syn | 1        |   |   |   | 1 |   |   |   | T              | S      |            |            |
| <i>Thlaspi arvense</i> L.                                     | Brassicaceae     | Acc      | Acc  | Acc  | Acc  | Acc | Acc  | Acc | 10       |   |   |   | 1 |   |   |   |                | P      |            |            |
| <i>Thunbergia alata</i> Bojer ex Sims                         | Acanthaceae      | NL       | NL   | Acc  | Acc  | Acc | Acc  | Acc | 12       |   | 1 | 1 | 1 | 1 |   |   |                |        | S          | O          |

| Species Name                                              | Family        | Atlantis | Muer | POWO | WFO | COL | GBIF | TRY | POWO Syn | H | P | G | T | C | F | L | Endemic Status | Native | Non native | Ornam Crop |
|-----------------------------------------------------------|---------------|----------|------|------|-----|-----|------|-----|----------|---|---|---|---|---|---|---|----------------|--------|------------|------------|
| <i>Thunbergia grandiflora</i> (Roxb. ex Rottl.) Roxb.     | Acanthaceae   | NL       | NL   | Acc  | Acc | Acc | Acc  | Acc | 9        |   | 1 | 1 |   | 1 |   |   |                |        | S          | O          |
| <i>Thymus origanoides</i> Webb & Berthel.                 | Lamiaceae     | Acc      | Acc  | Acc  | Acc | Acc | Acc  | Acc | 1        |   |   |   |   |   |   | 1 | L              | S      |            |            |
| <i>Thymus vulgaris</i> L.                                 | Lamiaceae     | Acc      | Acc  | Acc  | Acc | Acc | Acc  | Acc | 2        |   |   |   | 1 |   |   |   |                |        | S          | C          |
| <i>Tillandsia bergeri</i> Mez.                            | Bromeliaceae  | Acc      | NL   | Acc  | Acc | Acc | Acc  | Acc | 0        |   |   |   | 1 |   |   |   |                |        | S          | O          |
| <i>Tipuana tipu</i> (Benth.) Kuntze                       | Fabaceae      | Acc      | Acc  | Acc  | Acc | Acc | Acc  | Acc | 3        |   |   |   |   | 1 |   |   |                |        | P          | O          |
| <i>Tithonia diversifolia</i> (Hemsl.) A.Gray              | Asteraceae    | Acc      | Acc  | Acc  | Acc | Acc | Acc  | Acc | 4        |   | 1 |   | 1 |   |   |   |                |        | S          | O          |
| <i>Todaroa aurea</i> (Sol.) Parl.                         | Apiaceae      | Acc      | Acc  | Acc  | Acc | Acc | Acc  | Acc | 2        | 1 | 1 | 1 | 1 | 1 |   |   | A              | S      |            |            |
| <i>Tolpis barbata</i> (L.) Gaertn.                        | Asteraceae    | Acc      | NL   | Acc  | Acc | Acc | Acc  | Acc | 15       | 1 | 1 | 1 | 1 | 1 | 1 | 1 |                | P      |            |            |
| <i>Tolpis calderae</i> Bolle                              | Asteraceae    | Acc      | Acc  | Acc  | Acc | Acc | Acc  | NL  | 0        |   | 1 |   |   |   |   |   | P              | S      |            |            |
| <i>Tolpis coronopifolia</i> (Desf.) Bif.                  | Asteraceae    | Acc      | Acc  | Acc  | Acc | Acc | Acc  | NL  | 6        |   | 1 |   | 1 | 1 |   |   | A              | S      |            |            |
| <i>Tolpis crassiuscula</i> Svent.                         | Asteraceae    | Acc      | Acc  | Acc  | Acc | Acc | Acc  | Acc | 0        |   |   |   | 1 |   |   |   | T              | S      |            |            |
| <i>Tolpis glabrescens</i> Kämmer                          | Asteraceae    | Acc      | Acc  | Acc  | Acc | Acc | Acc  | NL  | 0        |   |   |   | 1 |   |   |   | T              | S      |            |            |
| <i>Tolpis laciniata</i> (Sch.Bip.) Webb                   | Asteraceae    | Acc      | Acc  | Acc  | Acc | Acc | Acc  | Acc | 1        | 1 | 1 | 1 | 1 |   |   |   | A              | S      |            |            |
| <i>Tolpis lagopoda</i> C.Sm. ex Link.                     | Asteraceae    | Acc      | Acc  | Acc  | Acc | Acc | Acc  | Acc | 2        |   | 1 |   | 1 | 1 |   |   | A              | S      |            |            |
| <i>Tolpis proustii</i> Pit.                               | Asteraceae    | Acc      | Acc  | Acc  | Acc | Acc | Acc  | Acc | 0        | 1 |   | 1 |   |   |   |   | A              | S      |            |            |
| <i>Tolpis santosii</i> D.J.Crawford, Mort & J.K.Archibald | Asteraceae    | Acc      | Acc  | Acc  | NL  | Acc | Acc  | NL  | 0        |   | 1 |   |   |   |   |   | P              | S      |            |            |
| <i>Tolpis umbellata</i> Bertol.                           | Asteraceae    | NL       | Acc  | Acc  | Acc | Acc | Acc  | Acc | 10       | 1 | 1 | 1 | 1 | 1 | 1 | 1 |                | P      |            |            |
| <i>Tolpis webbii</i> Sch.Bip.                             | Asteraceae    | Acc      | Acc  | Acc  | Acc | Acc | Acc  | Acc | 1        |   |   |   | 1 |   |   |   | T              | S      |            |            |
| <i>Torilis arvensis</i> (Huds.) Link                      | Apiaceae      | Acc      | Acc  | Acc  | Acc | Acc | Acc  | Acc | 22       |   |   |   |   |   | 1 |   |                | P      |            |            |
| <i>Torilis elongata</i> (Hoffmanns. & Link) Samp.         | Apiaceae      | Acc      | Acc  | Acc  | Syn | Syn | Acc  | NL  | 12       | 1 | 1 | 1 | 1 | 1 | 1 | 1 |                | P      |            |            |
| <i>Torilis leptophylla</i> (L.) Rchb.f.                   | Apiaceae      | Acc      | Acc  | Acc  | Acc | Acc | Acc  | Acc | 11       | 1 | 1 | 1 | 1 |   | 1 | 1 |                | P      |            |            |
| <i>Torilis nodosa</i> (L.) Gaertn.                        | Apiaceae      | Acc      | Acc  | Acc  | Acc | Acc | Acc  | Acc | 11       | 1 | 1 | 1 | 1 | 1 | 1 | 1 |                | P      |            |            |
| <i>Torilis webbii</i> Bianca                              | Apiaceae      | Syn      | Syn  | Syn  | Acc | Syn | Acc  | Acc |          |   |   |   | 1 |   | 1 | 1 |                | P      |            |            |
| <i>Tradescantia cerinthoides</i> Kunth                    | Commelinaceae | Acc      | Acc  | Acc  | Acc | Acc | Acc  | Acc | 3        |   |   |   |   | 1 |   |   |                |        | S          | O          |

| Species Name                                       | Family           | Atlantis | Muer | POWO | WFO  | COL | GBIF | TRY | POWO Syn | H | P | G | T | C | F | L | Endemic Status | Native | Non native | Ornam Crop |
|----------------------------------------------------|------------------|----------|------|------|------|-----|------|-----|----------|---|---|---|---|---|---|---|----------------|--------|------------|------------|
| <i>Tradescantia fluminensis</i> Vell.              | Commelinaceae    | Acc      | Acc  | Acc  | Acc  | Acc | Acc  | Acc | 2        |   | 1 | 1 | 1 | 1 |   |   |                |        | I          | O          |
| <i>Tradescantia pallida</i> (Rose) D.R.Hunt        | Commelinaceae    | Acc      | Acc  | Acc  | Acc  | Acc | Acc  | Acc | 6        |   | 1 | 1 | 1 | 1 |   |   |                |        | S          | O          |
| <i>Tradescantia sillamontana</i> Matuda            | Commelinaceae    | NL       | NL   | Acc  | Acc  | Acc | Acc  | Acc | 1        |   | 1 |   |   |   |   |   |                |        | S          |            |
| <i>Tradescantia spathacea</i> Sw.                  | Commelinaceae    | NL       | NL   | Acc  | Acc  | Acc | Acc  | Acc | 9        |   |   |   |   | 1 |   |   |                |        | S          |            |
| <i>Tradescantia zebrina</i> Bosse                  | Commelinaceae    | Acc      | Acc  | Acc  | Acc  | Acc | Acc  | Acc | 1        |   | 1 |   | 1 | 1 |   |   |                |        | S          | O          |
| <i>Traganum moquinii</i> Webb ex Moq.              | Amaranthaceae    | Acc      | Acc  | Acc  | Acc  | Acc | Acc  | Acc | 0        |   |   | 1 | 1 | 1 | 1 | 1 |                | S      |            |            |
| <i>Tragopogon porrifolius</i> L.                   | Asteraceae       | Acc      | Acc  | Acc  | Acc  | Acc | Acc  | Acc | 0        |   | 1 | 1 | 1 | 1 |   |   |                |        | P          |            |
| <i>Tragus racemosus</i> (L.) All.                  | Poaceae          | Acc      | Acc  | Acc  | Acc  | Acc | Acc  | Acc | 19       | 1 | 1 | 1 | 1 | 1 | 1 | 1 |                | P      |            |            |
| <i>Tribulus terrestris</i> L.                      | Zygophyllaceae   | Acc      | Acc  | Acc  | Acc  | Acc | Acc  | Acc | 22       |   | 1 |   | 1 | 1 | 1 |   |                |        | P          |            |
| <i>Trichocereus macrogonus</i> (Salm-Dyck) Riccob. | Cactaceae        | NL       | NL   | Acc  | Syn  | NL  | Acc  | NL  | 14       |   |   |   | 1 |   |   |   |                | S      |            | O          |
| <i>Tricholaena teneriffae</i> (L.f.) Link          | Poaceae          | Acc      | Acc  | Acc  | Acc  | Acc | Acc  | Acc | 5        | 1 | 1 | 1 | 1 | 1 | 1 | 1 |                | S      |            |            |
| <i>Trichomanes speciosum</i> Willd.                | Hymenophyllaceae | Syn      | Syn  | Acc  | AmUn | Syn | Syn  | Acc | 8        | 1 | 1 | 1 | 1 | 1 |   |   |                | S      |            |            |
| <i>Trifolium angustifolium</i> L.                  | Fabaceae         | Acc      | Acc  | Acc  | Acc  | Acc | Acc  | Acc | 1        | 1 | 1 | 1 | 1 | 1 | 1 | 1 |                | P      |            |            |
| <i>Trifolium arvense</i> L.                        | Fabaceae         | Acc      | Acc  | Acc  | Acc  | Acc | Acc  | Acc | 21       | 1 | 1 | 1 | 1 | 1 | 1 | 1 |                | P      |            |            |
| <i>Trifolium aureum</i> Pollich                    | Fabaceae         | Acc      | Acc  | Acc  | Acc  | Acc | Acc  | Acc | 3        |   | 1 | 1 |   | 1 |   | 1 |                |        | P          |            |
| <i>Trifolium bocconei</i> Savi                     | Fabaceae         | Acc      | Acc  | Acc  | Acc  | Acc | Acc  | Acc | 3        | 1 | 1 | 1 | 1 |   |   |   |                | P      |            |            |
| <i>Trifolium campestre</i> Schreb.                 | Fabaceae         | Acc      | Acc  | Acc  | Acc  | Acc | Acc  | Acc | 2        | 1 | 1 | 1 | 1 | 1 | 1 | 1 |                | P      |            |            |
| <i>Trifolium cernuum</i> Brot.                     | Fabaceae         | Acc      | NL   | Acc  | Acc  | Acc | Acc  | Acc | 5        |   |   |   | 1 |   |   |   |                |        | P          |            |
| <i>Trifolium cherleri</i> L.                       | Fabaceae         | Acc      | Acc  | Acc  | Acc  | Acc | Acc  | Acc | 5        | 1 | 1 | 1 | 1 | 1 |   |   |                | P      |            |            |
| <i>Trifolium dubium</i> Sibth.                     | Fabaceae         | Acc      | Acc  | Acc  | Acc  | Acc | Acc  | Acc | 6        | 1 | 1 | 1 | 1 | 1 | 1 |   |                | P      |            |            |
| <i>Trifolium fragiferum</i> L.                     | Fabaceae         | Acc      | Acc  | Acc  | Acc  | Acc | Acc  | Acc | 2        |   |   |   | 1 | 1 |   |   |                | P      |            |            |
| <i>Trifolium gemellum</i> Willd.                   | Fabaceae         | Acc      | Acc  | Acc  | Acc  | Acc | Acc  | Acc | 0        | 1 |   |   | 1 |   |   |   |                |        | P          |            |
| <i>Trifolium glomeratum</i> L.                     | Fabaceae         | Acc      | Acc  | Acc  | Acc  | Acc | Acc  | Acc | 5        | 1 | 1 | 1 | 1 | 1 | 1 | 1 |                | P      |            |            |
| <i>Trifolium hirtum</i> All.                       | Fabaceae         | Acc      | Acc  | Acc  | Acc  | Acc | Acc  | Acc | 4        |   |   |   | 1 |   |   |   |                |        | P          |            |

| Species Name                                   | Family     | Atlantis | Muer | POWO | WFO | COL | GBIF | TRY | POWO Syn | H | P | G | T | C | F | L | Endemic Status | Native | Non native | Ornam Crop |
|------------------------------------------------|------------|----------|------|------|-----|-----|------|-----|----------|---|---|---|---|---|---|---|----------------|--------|------------|------------|
| <i>Trifolium lappaceum</i> L.                  | Fabaceae   | Acc      | Acc  | Acc  | Acc | Acc | Acc  | Acc | 0        |   |   | 1 | 1 |   |   | 1 |                | P      |            |            |
| <i>Trifolium ligusticum</i> Loisel.            | Fabaceae   | Acc      | Acc  | Acc  | Acc | Acc | Acc  | Acc | 5        | 1 | 1 | 1 | 1 | 1 |   |   |                | P      |            |            |
| <i>Trifolium micranthum</i> Viv.               | Fabaceae   | Acc      | Acc  | Acc  | Acc | Acc | Acc  | Acc | 9        |   | 1 |   |   |   |   |   |                | P      |            |            |
| <i>Trifolium obscurum</i> Savi                 | Fabaceae   | Acc      | Syn  | Acc  | Acc | Acc | Acc  | Acc | 0        |   | 1 | 1 |   | 1 |   |   |                |        | P          |            |
| <i>Trifolium occidentale</i> Coombe            | Fabaceae   | NL       | NL   | Acc  | Syn | Syn | Acc  | Syn | 2        |   | 1 |   |   |   |   |   |                |        | S          |            |
| <i>Trifolium pratense</i> L.                   | Fabaceae   | Acc      | Acc  | Acc  | Acc | Acc | Acc  | Acc | 1        |   |   |   | 1 | 1 | 1 |   |                |        | S          |            |
| <i>Trifolium repens</i> L.                     | Fabaceae   | Acc      | Acc  | Acc  | Acc | Acc | Acc  | Acc | 1        | 1 | 1 |   | 1 | 1 | 1 |   |                |        | S          |            |
| <i>Trifolium resupinatum</i> L.                | Fabaceae   | Acc      | Acc  | Acc  | Acc | Acc | Acc  | Acc | 2        |   |   | 1 | 1 | 1 |   |   |                | P      |            |            |
| <i>Trifolium scabrum</i> L.                    | Fabaceae   | Acc      | Acc  | Acc  | Acc | Acc | Acc  | Acc | 3        | 1 | 1 | 1 | 1 | 1 | 1 | 1 |                | P      |            |            |
| <i>Trifolium spumosum</i> L.                   | Fabaceae   | Acc      | Acc  | Acc  | Acc | Acc | Acc  | Acc | 4        |   |   |   |   | 1 |   |   |                | P      |            |            |
| <i>Trifolium squamosum</i> L.                  | Fabaceae   | Acc      | Acc  | Acc  | Acc | Acc | Acc  | Acc | 15       |   | 1 | 1 |   |   |   |   |                | P      |            |            |
| <i>Trifolium squarrosum</i> L.                 | Fabaceae   | Acc      | Acc  | Acc  | Acc | Acc | Acc  | Acc | 0        |   | 1 | 1 | 1 | 1 |   |   |                | P      |            |            |
| <i>Trifolium stellatum</i> L.                  | Fabaceae   | Acc      | Acc  | Acc  | Acc | Acc | Acc  | Acc | 0        |   | 1 | 1 | 1 | 1 | 1 | 1 |                | P      |            |            |
| <i>Trifolium striatum</i> L.                   | Fabaceae   | Acc      | Acc  | Acc  | Acc | Acc | Acc  | Acc | 6        | 1 | 1 | 1 | 1 | 1 | 1 |   |                | P      |            |            |
| <i>Trifolium subterraneum</i> L.               | Fabaceae   | Acc      | Acc  | Acc  | Acc | Acc | Acc  | Acc | 2        | 1 | 1 | 1 | 1 | 1 |   |   |                | P      |            |            |
| <i>Trifolium suffocatum</i> L.                 | Fabaceae   | Acc      | Acc  | Acc  | Acc | Acc | Acc  | Acc | 4        | 1 | 1 |   | 1 | 1 |   |   |                | P      |            |            |
| <i>Trifolium tomentosum</i> L.                 | Fabaceae   | Acc      | Acc  | Acc  | Acc | Acc | Acc  | Acc | 6        | 1 | 1 | 1 | 1 | 1 | 1 | 1 |                | P      |            |            |
| <i>Trigonella anguina</i> Delile               | Fabaceae   | Acc      | NL   | Acc  | Acc | Acc | Acc  | Acc | 4        |   |   | 1 |   |   | 1 | 1 |                | P      |            |            |
| <i>Trigonella stellata</i> Forrk.              | Fabaceae   | Acc      | Acc  | Acc  | Acc | Acc | Acc  | Acc | 8        |   |   |   | 1 | 1 | 1 | 1 |                | S      |            |            |
| <i>Triplachne nitens</i> (Guss.) Link          | Poaceae    | Acc      | Acc  | Acc  | Acc | Acc | Acc  | Acc | 6        |   |   |   |   | 1 | 1 | 1 |                | S      |            |            |
| <i>Tripleurospermum inodorum</i> (L.) Sch.Bip. | Asteraceae | Acc      | Acc  | Acc  | Acc | Acc | Acc  | Acc | 36       |   |   |   |   | 1 |   |   |                |        | S          |            |
| <i>Trisetaria lapalmae</i> H.Scholz            | Poaceae    | Acc      | NL   | Syn  | Syn | Syn | Syn  | NL  |          | 1 | 1 |   | 1 | 1 | 1 | 1 | A              | S      |            |            |
| <i>Trisetaria loeflingiana</i> (L.) Paunero    | Poaceae    | Acc      | Acc  | Acc  | Acc | Acc | Acc  | Acc | 17       |   | 1 |   |   |   | 1 | 1 |                | P      |            |            |
| <i>Trisetaria panicea</i> (Lam.) Paunero       | Poaceae    | Acc      | Acc  | Acc  | Acc | Acc | Acc  | Acc | 22       | 1 | 1 | 1 | 1 | 1 | 1 | 1 |                | P      |            |            |



| Species Name                                          | Family         | Atlantis | Muer | POWO | WFO | COL | GBIF | TRY | POWO Syn | H | P | G | T | C | F | L | Endemic Status | Native | Non native | Ornam Crop |
|-------------------------------------------------------|----------------|----------|------|------|-----|-----|------|-----|----------|---|---|---|---|---|---|---|----------------|--------|------------|------------|
| <i>Trisetum tamonanteae</i> Marrero Rodr. & S. Scholz | Poaceae        | Acc      | Acc  | Acc  | NL  | Acc | Acc  | NL  | 0        |   |   |   |   |   | 1 |   | F              | S      |            |            |
| <i>Triticum aestivum</i> L.                           | Poaceae        | Acc      | Acc  | Acc  | Acc | Acc | Acc  | Acc | 3        |   | 1 |   |   | 1 | 1 |   |                |        | S          | C          |
| <i>Triticum turgidum</i> L.                           | Poaceae        | Acc      | Acc  | Acc  | Acc | Acc | Acc  | Acc | 59       |   |   |   |   |   | 1 |   |                |        | S          | C          |
| <i>Tropaeolum majus</i> L.                            | Tropaeolaceae  | Acc      | Acc  | Acc  | Acc | Acc | Acc  | Acc | 20       | 1 | 1 | 1 | 1 | 1 | 1 | 1 |                |        | I          | O          |
| <i>Tuberaria guttata</i> (L.) Fourr.                  | Cistaceae      | Acc      | Acc  | Acc  | Acc | Acc | Acc  | Acc | 48       | 1 | 1 | 1 | 1 | 1 | 1 | 1 |                | P      |            |            |
| <i>Tuberaria lignosa</i> (Sweet) Samp.                | Cistaceae      | Acc      | Acc  | Acc  | Acc | Acc | Acc  | Acc | 11       |   | 1 |   | 1 |   |   |   |                | P      |            |            |
| <i>Turnera ulmifolia</i> L.                           | Passifloraceae | Acc      | Acc  | Acc  | Acc | Acc | Acc  | Acc | 11       |   | 1 |   | 1 | 1 | 1 | 1 |                |        | S          | O          |
| <i>Typha domingensis</i> Pers.                        | Typhaceae      | Acc      | Acc  | Acc  | Acc | Acc | Acc  | Acc | 28       |   |   | 1 | 1 | 1 | 1 |   |                | P      |            | O          |
| <i>Ulex europaeus</i> L.                              | Fabaceae       | Acc      | Acc  | Acc  | Acc | Acc | Acc  | Acc | 1        |   |   |   | 1 |   |   |   |                |        | I          |            |
| <i>Ulmus minor</i> Mill.                              | Ulmaceae       | Acc      | Acc  | Acc  | Acc | Acc | Acc  | Acc | 61       |   | 1 |   | 1 | 1 |   |   |                |        | S          |            |
| <i>Umbilicus heylandianus</i> Webb & Berthel.         | Crassulaceae   | Acc      | Acc  | Acc  | Acc | Acc | Acc  | NL  | 8        |   | 1 |   |   | 1 |   |   |                | P      |            |            |
| <i>Umbilicus horizontalis</i> (Guss.) DC.             | Crassulaceae   | Syn      | Syn  | Acc  | Acc | Acc | Acc  | Acc | 7        | 1 | 1 | 1 | 1 | 1 | 1 | 1 |                | P      |            |            |
| <i>Urochloa mutica</i> (Forssk.) T.Q. Nguyen          | Poaceae        | Acc      | NL   | Acc  | Syn | Syn | Syn  | Syn | 14       |   | 1 |   |   | 1 |   |   |                |        | I          |            |
| <i>Urochloa plantaginea</i> (Link) R.D.Webster        | Poaceae        | Acc      | NL   | Acc  | Syn | Syn | Syn  | Syn | 6        |   |   |   |   | 1 |   |   |                |        | I          |            |
| <i>Urochloa subquadrifera</i> (Trin.) R.D.Webster     | Poaceae        | NL       | NL   | Acc  | Syn | Syn | Acc  | Syn | 5        |   |   |   | 1 |   |   |   |                |        | S          |            |
| <i>Urospermum picroides</i> (L.) Scop. ex F.W.Schmidt | Asteraceae     | Acc      | Acc  | Acc  | Acc | Acc | Acc  | Acc | 12       | 1 | 1 | 1 | 1 | 1 | 1 | 1 |                | P      |            |            |
| <i>Urtica membranacea</i> Poir. ex Savigny            | Urticaceae     | Acc      | Acc  | Acc  | Acc | Acc | Acc  | Acc | 9        | 1 | 1 | 1 | 1 | 1 | 1 |   |                | P      |            |            |
| <i>Urtica morifolia</i> Poir.                         | Urticaceae     | Acc      | Acc  | Acc  | Acc | Acc | Acc  | Acc | 1        | 1 | 1 | 1 | 1 | 1 |   |   |                | S      |            |            |
| <i>Urtica stachyoides</i> Webb & Berthel.             | Urticaceae     | Acc      | Acc  | Acc  | Acc | Acc | Acc  | Acc | 2        | 1 | 1 |   | 1 | 1 |   |   | A              | S      |            |            |
| <i>Urtica urens</i> L.                                | Urticaceae     | Acc      | Acc  | Acc  | Acc | Acc | Acc  | Acc | 9        | 1 | 1 | 1 | 1 | 1 | 1 | 1 |                | P      |            |            |
| <i>Vachellia farnesiana</i> (L.) Wight & Arn.         | Fabaceae       | Syn      | Syn  | Acc  | Syn | Acc | Acc  | Acc | 4        | 1 |   | 1 | 1 | 1 | 1 | 1 |                |        | I          | O          |
| <i>Valantia hispida</i> L.                            | Rubiaceae      | Acc      | Acc  | Acc  | Acc | Acc | Acc  | Acc | 1        | 1 | 1 | 1 | 1 | 1 | 1 | 1 |                | P      |            |            |
| <i>Valeriana calcitrapae</i> L.                       | Caprifoliaceae | Syn      | Syn  | Acc  | Syn | NL  | Syn  | Syn | 13       | 1 | 1 | 1 | 1 | 1 |   |   |                | P      |            |            |
| <i>Valeriana carinata</i> (Loisel.) Christenh. & Byng | Caprifoliaceae | Syn      | Syn  | Acc  | Syn | Syn | Syn  | Syn | 8        |   |   |   | 1 |   |   |   |                |        | P          |            |

| Species Name                                                 | Family           | Atlantis | Muer | POWO | WFO | COL | GBIF | TRY | POWO Syn | H | P | G | T | C | F | L | Endemic Status | Native | Non native | Ornam Crop |
|--------------------------------------------------------------|------------------|----------|------|------|-----|-----|------|-----|----------|---|---|---|---|---|---|---|----------------|--------|------------|------------|
| <i>Valeriana coronata</i> (L.) Mill.                         | Caprifoliaceae   | Syn      | Syn  | Acc  | Syn | Syn | Acc  | Syn | 12       |   |   |   |   | 1 |   |   |                |        | P          |            |
| <i>Valeriana dentata</i> (L.) All.                           | Caprifoliaceae   | Syn      | Syn  | Acc  | Syn | Syn | Syn  | Syn | 21       |   | 1 |   |   |   |   |   |                |        | P          |            |
| <i>Valeriana discoidea</i> (L.) Willd.                       | Caprifoliaceae   | Syn      | Syn  | Acc  | Syn | Syn | Syn  | Syn | 8        |   |   |   |   |   | 1 |   |                |        | P          |            |
| <i>Valeriana eriocarpa</i> (Desv.) Christenh. & Byng         | Caprifoliaceae   | Syn      | Syn  | Acc  | Syn | Syn | Syn  | Syn | 10       |   |   |   | 1 | 1 |   |   |                |        | P          |            |
| <i>Valeriana locusta</i> L.                                  | Caprifoliaceae   | Syn      | Syn  | Acc  | Syn | Syn | Acc  | Syn | 18       |   |   |   | 1 | 1 |   |   |                |        | P          |            |
| <i>Valeriana rubra</i> L.                                    | Caprifoliaceae   | Syn      | Syn  | Acc  | Syn | Syn | Syn  | Syn | 8        | 1 | 1 | 1 | 1 | 1 | 1 | 1 |                |        | I          |            |
| <i>Valerianella abyssinica</i> Fresen.                       | Caprifoliaceae   | Syn      | NL   | Acc  | Syn | Acc | Acc  | Syn | 0        |   |   | 1 | 1 |   |   |   |                |        | P          |            |
| <i>Valerianella muricata</i> (Steven ex M.Bieb.) W.H.Baxter  | Caprifoliaceae   | Acc      | Acc  | Acc  | Acc | Syn | Acc  | Acc | 6        |   |   |   | 1 |   |   |   |                |        | P          |            |
| <i>Verbascum creticum</i> (L.f.) Cav.                        | Scrophulariaceae | Acc      | Acc  | Acc  | Acc | Acc | Acc  | Acc | 10       |   |   |   |   | 1 |   |   |                |        | S          |            |
| <i>Verbascum sinuatum</i> L.                                 | Scrophulariaceae | Acc      | Acc  | Acc  | Acc | Acc | Acc  | Acc | 12       |   |   |   |   | 1 |   |   |                |        | S          |            |
| <i>Verbascum thapsus</i> L.                                  | Scrophulariaceae | Acc      | Acc  | Acc  | Acc | Acc | Acc  | Acc | 32       |   |   |   | 1 |   |   |   |                |        | I          |            |
| <i>Verbascum virgatum</i> Stokes                             | Scrophulariaceae | Acc      | Acc  | Acc  | Acc | Acc | Acc  | Acc | 11       |   | 1 | 1 | 1 | 1 |   |   |                |        | S          |            |
| <i>Verbena bonariensis</i> L.                                | Verbenaceae      | Acc      | Acc  | Acc  | Acc | Acc | Acc  | Acc | 8        |   | 1 | 1 | 1 | 1 |   |   |                |        | S          | C          |
| <i>Verbena officinalis</i> L.                                | Verbenaceae      | Acc      | Acc  | Acc  | Acc | Acc | Acc  | Acc | 0        |   | 1 | 1 | 1 | 1 | 1 | 1 |                |        | S          | C          |
| <i>Verbena supina</i> L.                                     | Verbenaceae      | Acc      | Acc  | Acc  | Acc | Acc | Acc  | Acc | 7        |   |   |   | 1 | 1 | 1 | 1 |                |        | S          | C          |
| <i>Verbesina encelioides</i> (Cav.) Benth. & Hook. ex A.Gray | Asteraceae       | Acc      | Acc  | Acc  | Acc | Acc | Acc  | Acc | 14       |   |   |   |   | 1 |   |   |                |        | S          | O          |
| <i>Veronica agrestis</i> L.                                  | Plantaginaceae   | Acc      | Acc  | Acc  | Acc | Acc | Acc  | Acc | 12       |   |   | 1 | 1 | 1 |   |   |                |        | S          |            |
| <i>Veronica anagallis-aquatica</i> L.                        | Plantaginaceae   | Acc      | Acc  | Acc  | Acc | Acc | Acc  | Acc | 26       |   |   |   | 1 | 1 |   |   |                | P      |            |            |
| <i>Veronica arvensis</i> L.                                  | Plantaginaceae   | Acc      | Acc  | Acc  | Acc | Acc | Acc  | Acc | 19       | 1 | 1 | 1 | 1 | 1 | 1 | 1 |                | P      |            |            |
| <i>Veronica beccabunga</i> L.                                | Plantaginaceae   | Acc      | Acc  | Acc  | Acc | Acc | Acc  | Acc | 12       |   | 1 | 1 | 1 | 1 |   |   |                | P      |            |            |
| <i>Veronica hederifolia</i> L.                               | Plantaginaceae   | Acc      | Acc  | Acc  | Acc | Acc | Acc  | Acc | 9        |   |   |   | 1 | 1 |   |   |                | P      |            |            |
| <i>Veronica persica</i> Poir.                                | Plantaginaceae   | Acc      | Acc  | Acc  | Acc | Acc | Acc  | Acc | 19       |   | 1 | 1 | 1 | 1 |   |   |                |        | P          |            |
| <i>Veronica polita</i> Fries                                 | Plantaginaceae   | Acc      | Acc  | Acc  | Acc | Acc | Acc  | Acc | 6        |   |   | 1 | 1 | 1 |   |   |                |        | P          |            |

| Species Name                                  | Family         | Atlantis | Muer | POWO | WFO  | COL  | GBIF | TRY | POWO Syn | H | P | G | T | C | F | L | Endemic Status | Native | Non native | Ornam Crop |
|-----------------------------------------------|----------------|----------|------|------|------|------|------|-----|----------|---|---|---|---|---|---|---|----------------|--------|------------|------------|
| <i>Veronica serpyllifolia</i> L.              | Plantaginaceae | Acc      | Acc  | Acc  | Acc  | Acc  | Acc  | Acc | 26       |   |   |   | 1 |   |   |   |                | P      |            |            |
| <i>Viburnum rugosum</i> Pers.                 | Adoxaceae      | Acc      | Syn  | Acc  | Syn  | Syn  | Syn  | Syn | 5        | 1 | 1 | 1 | 1 | 1 |   |   | A              | S      |            |            |
| <i>Vicia aphylla</i> C. Sm. ex Buch           | Fabaceae       | Acc      | Acc  | Acc  | Acc  | Acc  | Acc  | NL  | 3        | 1 | 1 | 1 | 1 | 1 |   |   | A              | S      |            |            |
| <i>Vicia articulata</i> Hornem.               | Fabaceae       | Acc      | Acc  | Acc  | Acc  | Acc  | Acc  | Acc | 16       | 1 | 1 | 1 | 1 | 1 |   |   |                |        | S          |            |
| <i>Vicia benghalensis</i> L.                  | Fabaceae       | Acc      | Acc  | Acc  | Acc  | Acc  | Acc  | Acc | 1        | 1 | 1 | 1 | 1 | 1 | 1 | 1 |                |        | P          |            |
| <i>Vicia chaetocalyx</i> Webb & Berthel.      | Fabaceae       | Acc      | Acc  | Acc  | Acc  | Acc  | Acc  | NL  | 1        |   |   |   |   | 1 |   |   | C              | S      |            |            |
| <i>Vicia disperma</i> DC.                     | Fabaceae       | Acc      | Acc  | Acc  | Acc  | Acc  | Acc  | Acc | 7        | 1 | 1 | 1 | 1 | 1 |   |   |                | P      |            |            |
| <i>Vicia ervilia</i> (L.) Willd.              | Fabaceae       | Acc      | Acc  | Acc  | Acc  | Acc  | Acc  | Acc | 6        |   |   |   | 1 | 1 |   |   |                |        | P          |            |
| <i>Vicia faba</i> L.                          | Fabaceae       | Acc      | Acc  | Acc  | Acc  | Acc  | Acc  | Acc | 15       |   |   |   | 1 | 1 |   |   |                |        | S          | C          |
| <i>Vicia filicaulis</i> Webb & Berthel.       | Fabaceae       | Acc      | Acc  | Acc  | Acc  | Acc  | Acc  | Acc | 0        |   |   |   |   | 1 |   |   | C              | S      |            |            |
| <i>Vicia hirsuta</i> (L.) Gray                | Fabaceae       | Acc      | Acc  | Acc  | Acc  | Acc  | Acc  | Acc | 15       | 1 | 1 | 1 | 1 | 1 |   | 1 |                | P      |            |            |
| <i>Vicia lens</i> (L.) Coss. & Germ.          | Fabaceae       | Syn      | Syn  | Acc  | Syn  | Syn  | Syn  | Syn | 8        | 1 | 1 | 1 | 1 | 1 | 1 | 1 |                |        | S          | C          |
| <i>Vicia lutea</i> L.                         | Fabaceae       | Acc      | Acc  | Acc  | Acc  | Acc  | Acc  | Acc | 3        | 1 | 1 | 1 | 1 | 1 | 1 | 1 |                | P      |            |            |
| <i>Vicia monantha</i> Retz.                   | Fabaceae       | Acc      | NL   | Acc  | Acc  | Acc  | Acc  | Acc | 5        | 1 | 1 |   | 1 | 1 |   | 1 |                | P      |            |            |
| <i>Vicia nataliae</i> U.Reifenb. & U.Reifenb. | Fabaceae       | Acc      | Acc  | Acc  | AmUn | AmUn | Acc  | NL  | 0        |   |   | 1 | 1 |   |   |   | A              | S      |            |            |
| <i>Vicia pannonica</i> Crantz                 | Fabaceae       | NL       | NL   | Acc  | Acc  | Acc  | Acc  | Acc | 11       | 1 |   |   | 1 | 1 |   |   |                |        | P          |            |
| <i>Vicia parviflora</i> Cav                   | Fabaceae       | Acc      | Acc  | Acc  | Acc  | Acc  | Acc  | Acc | 8        | 1 | 1 | 1 | 1 | 1 | 1 | 1 |                | P      |            |            |
| <i>Vicia pubescens</i> (DC.) Link.            | Fabaceae       | Acc      | Acc  | Acc  | Acc  | Acc  | Acc  | Acc | 8        | 1 | 1 | 1 | 1 | 1 | 1 |   |                | P      |            |            |
| <i>Vicia sativa</i> L.                        | Fabaceae       | Acc      | Acc  | Acc  | Acc  | Acc  | Acc  | Acc | 0        | 1 | 1 | 1 | 1 |   |   |   |                | P      |            |            |
| <i>Vicia scandens</i> R.P.Murray              | Fabaceae       | Acc      | Acc  | Acc  | Acc  | Acc  | Acc  | Acc | 0        |   |   |   | 1 |   |   |   | T              | P      |            |            |
| <i>Vicia tenoi</i> Marrero Rodr.              | Fabaceae       | Acc      | NL   | NL   | NL   | AmUn | Acc  | NL  |          |   |   |   | 1 |   |   |   | T              | S      |            |            |
| <i>Vicia tenuifolia</i> Roth                  | Fabaceae       | Acc      | NL   | Acc  | Acc  | Acc  | Acc  | Acc | 3        |   |   |   |   | 1 |   |   |                |        | P          |            |
| <i>Vicia tetrasperma</i> (L.) Schreb.         | Fabaceae       | Acc      | Acc  | Acc  | Acc  | Acc  | Acc  | Acc | 10       | 1 | 1 | 1 | 1 | 1 | 1 | 1 |                | P      |            |            |
| <i>Vicia villosa</i> Roth                     | Fabaceae       | Acc      | Acc  | Acc  | Acc  | Acc  | Acc  | Acc | 0        | 1 |   |   |   |   |   |   |                |        | P          |            |

| Species Name                                                        | Family           | Atlantis | Muer | POWO | WFO  | COL  | GBIF | TRY | POWO Syn | H | P | G | T | C | F | L | Endemic Status | Native | Non native | Ornam Crop |
|---------------------------------------------------------------------|------------------|----------|------|------|------|------|------|-----|----------|---|---|---|---|---|---|---|----------------|--------|------------|------------|
| <i>Vicia voggenreiteriana</i> Gil, R. Mesa & M. L. Gil              | Fabaceae         | Acc      | Acc  | Acc  | NL   | AmUn | Acc  | NL  | 0        |   |   | 1 |   |   |   |   | G              | S      |            |            |
| <i>Vicia vulcanorum</i> J.Gil & M.L.Gil                             | Fabaceae         | Acc      | Acc  | Acc  | NL   | AmUn | Acc  | NL  | 0        |   | 1 |   |   |   | 1 | 1 | A              | S      |            |            |
| <i>Vieraea laevigata</i> (Willd.) Webb ex Sch.Bip.                  | Asteraceae       | Acc      | Acc  | Acc  | Acc  | Acc  | Acc  | Acc | 4        |   |   |   | 1 |   |   |   | T              | S      |            |            |
| <i>Vinca difformis</i> Pourr.                                       | Apocynaceae      | NL       | NL   | Acc  | Acc  | Acc  | Acc  | Acc | 1        |   | 1 |   | 1 |   |   |   |                |        | S          | O          |
| <i>Vinca major</i> L.                                               | Apocynaceae      | Acc      | Acc  | Acc  | Acc  | Acc  | Acc  | Acc | 2        | 1 | 1 | 1 | 1 | 1 |   |   |                |        | P          | O          |
| <i>Viola anagae</i> Gilli                                           | Violaceae        | Acc      | Acc  | Acc  | AmUn | Acc  | Acc  | Acc | 0        |   |   |   | 1 |   |   |   | T              | S      |            |            |
| <i>Viola arvensis</i> Murray                                        | Violaceae        | Acc      | Acc  | Acc  | Acc  | Acc  | Acc  | Acc | 21       |   | 1 | 1 | 1 |   |   |   |                | P      |            |            |
| <i>Viola cheiranthifolia</i> Bonpl.                                 | Violaceae        | Acc      | Acc  | Acc  | AmUn | Acc  | Acc  | Acc | 3        |   |   |   | 1 |   |   |   | T              | S      |            |            |
| <i>Viola guaxarensis</i> M. Marrero, Docoito Díaz & Martín Esquivel | Violaceae        | Acc      | NL   | NL   | NL   | AmUn | NL   | NL  |          |   |   |   | 1 |   |   |   | T              | S      |            |            |
| <i>Viola kitaibeliana</i> Schult.                                   | Violaceae        | Acc      | NL   | Acc  | Acc  | Acc  | Acc  | Acc | 3        |   |   |   | 1 |   |   |   |                | S      |            |            |
| <i>Viola odorata</i> L.                                             | Violaceae        | Acc      | Acc  | Acc  | Acc  | Acc  | Acc  | Acc | 36       |   | 1 | 1 | 1 | 1 |   |   |                | S      |            |            |
| <i>Viola palmensis</i> (Webb & Berthel.) Sauer                      | Violaceae        | Acc      | Acc  | Acc  | AmUn | Acc  | Acc  | NL  | 2        |   | 1 |   |   |   |   |   | P              | S      |            |            |
| <i>Viola plantaginea</i> Webb ex Christ                             | Violaceae        | Acc      | NL   | Syn  | Acc  | Syn  | Syn  | Syn | 0        |   |   | 1 |   |   |   |   | G              | S      |            |            |
| <i>Viola riviniana</i> Rchb.                                        | Violaceae        | Acc      | Acc  | Acc  | Acc  | Acc  | Acc  | Acc | 13       | 1 | 1 | 1 | 1 |   |   |   |                | P      |            |            |
| <i>Viola tricolor</i> L.                                            | Violaceae        | Acc      | Acc  | Acc  | Acc  | Acc  | Acc  | Acc | 59       |   | 1 | 1 | 1 |   |   |   |                |        | S          |            |
| <i>Visnaga dauroides</i> Gaertn.                                    | Apiaceae         | Syn      | Syn  | Acc  | Syn  | Acc  | Acc  | Syn | 10       |   | 1 |   |   | 1 |   |   |                | P      |            |            |
| <i>Visnea mocanera</i> L.f.                                         | Pentaphylacaceae | Acc      | Acc  | Acc  | AmUn | Acc  | Acc  | Acc | 2        | 1 | 1 | 1 | 1 | 1 | 1 |   |                | S      |            |            |
| <i>Vitis vinifera</i> L.                                            | Vitaceae         | Acc      | Acc  | Acc  | Acc  | Acc  | Acc  | Acc | 45       |   | 1 | 1 | 1 | 1 | 1 | 1 |                |        | S          | C          |
| <i>Volutaria bollei</i> (Sch.Bip. ex Bolle) A.Hansen & G.Kunkel     | Asteraceae       | Acc      | Acc  | Acc  | Acc  | Acc  | Acc  | Acc | 3        |   |   |   |   |   | 1 | 1 | A              | S      |            |            |
| <i>Volutaria canariensis</i> Wagenitz                               | Asteraceae       | Acc      | Acc  | Acc  | Acc  | Acc  | Acc  | Acc | 0        | 1 | 1 | 1 | 1 | 1 | 1 | 1 | A              | S      |            |            |
| <i>Volutaria lippii</i> (L.) Cass.                                  | Asteraceae       | NL       | Acc  | Acc  | Acc  | Acc  | Acc  | Acc | 0        |   |   |   | 1 |   | 1 |   |                | P      |            |            |
| <i>Volutaria tubuliflora</i> (Murb.) Sennen                         | Asteraceae       | Acc      | Acc  | Acc  | Acc  | Acc  | Acc  | NL  | 4        | 1 |   |   | 1 |   | 1 | 1 |                | P      |            |            |
| <i>Wahlenbergia lobelioides</i> (L.f.) Link.                        | Campanulaceae    | Acc      | NL   | Acc  | Acc  | Acc  | Acc  | Acc | 7        | 1 | 1 | 1 | 1 | 1 | 1 | 1 |                | S      |            |            |

| Species Name                                       | Family           | Atlantis | Muer | POWO | WFO | COL | GBIF | TRY | POWO Syn | H | P | G | T | C | F | L | Endemic Status | Native | Non native | Ornam Crop |
|----------------------------------------------------|------------------|----------|------|------|-----|-----|------|-----|----------|---|---|---|---|---|---|---|----------------|--------|------------|------------|
| <i>Waltheria indica</i> L.                         | Malvaceae        | Acc      | NL   | Acc  | Acc | Acc | Acc  | Acc | 20       |   | 1 |   |   |   |   |   |                |        | S          |            |
| <i>Wigandia urens</i> (Ruiz & Pav.) Kunth          | Boraginaceae     | Syn      | Syn  | Acc  | Acc | Acc | Acc  | Acc | 29       |   |   |   | 1 | 1 |   |   |                |        | S          | O          |
| <i>Withania aristata</i> (Aiton) Pauquy            | Solanaceae       | Acc      | Acc  | Acc  | Acc | Acc | Acc  | Acc | 2        | 1 | 1 | 1 | 1 | 1 |   |   |                | S      |            |            |
| <i>Withania frutescens</i> (L.) Pauq.              | Solanaceae       | Acc      | Acc  | Acc  | Acc | Acc | Acc  | Acc | 9        |   |   |   |   | 1 | 1 |   |                | P      |            |            |
| <i>Withania somnifera</i> (L.) Dunal.              | Solanaceae       | Acc      | Acc  | Acc  | Acc | Acc | Acc  | Acc | 20       |   | 1 | 1 | 1 | 1 |   |   |                | P      |            |            |
| <i>Wolffia arrhiza</i> (L.) Horkel ex Wimm.        | Araceae          | Acc      | Acc  | Acc  | Acc | Acc | Acc  | Acc | 7        |   |   |   | 1 |   |   |   |                |        | S          |            |
| <i>Woodwardia radicans</i> (L.) Sm.                | Blechnaceae      | Acc      | Acc  | Acc  | Acc | Acc | Acc  | Acc | 4        | 1 | 1 | 1 | 1 | 1 |   |   |                | S      |            |            |
| <i>Xanthium spinosum</i> L.                        | Asteraceae       | Acc      | Acc  | Acc  | Acc | Acc | Acc  | Acc | 2        |   | 1 |   | 1 | 1 | 1 | 1 |                |        | S          |            |
| <i>Xanthium strumarium</i> L.                      | Asteraceae       | Syn      | NL   | Acc  | Acc | Acc | Acc  | Acc | 0        |   |   |   | 1 | 1 | 1 | 1 |                |        | S          |            |
| <i>Xerochrysum bracteatum</i> (Svent.) Tzvelev     | Asteraceae       | Acc      | Acc  | Acc  | Acc | Acc | Acc  | Acc | 30       |   |   |   | 1 |   |   |   |                |        | S          | O          |
| <i>Youngia japonica</i> (L.) DC.                   | Asteraceae       | Acc      | NL   | Acc  | Acc | Acc | Acc  | Acc | 29       |   |   |   |   | 1 |   |   |                |        | I          |            |
| <i>Zannichellia palustris</i> L.                   | Potamogetonaceae | Acc      | Acc  | Acc  | Acc | Acc | Acc  | Acc | 1        |   |   | 1 | 1 | 1 | 1 |   |                | P      |            |            |
| <i>Zantedeschia aethiopica</i> (L.) Spreng.        | Araceae          | Acc      | Acc  | Acc  | Acc | Acc | Acc  | Acc | 8        |   | 1 | 1 | 1 | 1 | 1 | 1 |                |        | S          | O          |
| <i>Zea mays</i> L.                                 | Poaceae          | Acc      | Acc  | Acc  | Acc | Acc | Acc  | Acc | 5        | 1 | 1 | 1 | 1 | 1 | 1 | 1 |                |        | S          | C          |
| <i>Zostera noltii</i> Hornemann                    | Zosteraceae      | Acc      | NL   | Acc  | Acc | Acc | Acc  | Acc | 10       |   |   |   |   | 1 | 1 | 1 |                | S      |            |            |
| <i>Zoysia matrella</i> (L.) Merr.                  | Poaceae          | Acc      | Acc  | Acc  | Acc | Acc | Acc  | Acc | 4        |   | 1 |   |   |   |   |   |                | P      |            |            |
| <i>Zygophyllum creticum</i> (L.) Christenh. & Byng | Zygophyllaceae   | Syn      | Syn  | Acc  | Syn | Syn | Syn  | Syn | 8        | 1 | 1 | 1 | 1 | 1 | 1 | 1 |                | P      |            |            |
| <i>Zygophyllum fontanesii</i> Webb & Berthel.      | Zygophyllaceae   | Syn      | Syn  | Acc  | Syn | Syn | Syn  | Syn | 2        | 1 |   | 1 | 1 | 1 | 1 | 1 |                | S      |            |            |
| <i>Zygophyllum gaetulum</i> Emb. & Maire           | Zygophyllaceae   | Syn      | Syn  | Acc  | NL  | Syn | Syn  | Syn | 2        |   |   |   |   | 1 | 1 |   |                | S      |            |            |

### 3 Hybrids

| Species Name                                                          | Family           | Atlantis | Muer | POWO | WFO  | COL  | GBIF | TRY | POWO Syn | H | P | G | T | C | F | L | Endemic Status | Native | Non native | Ornam Crop |
|-----------------------------------------------------------------------|------------------|----------|------|------|------|------|------|-----|----------|---|---|---|---|---|---|---|----------------|--------|------------|------------|
| <i>Alstroemeria x hybrida</i> hort.                                   | Alstroemeriaceae | NL       | Acc  | NL   | NL   | AmUn | Acc  | NL  |          |   |   |   | 1 | 1 |   |   |                |        | S          | O          |
| <i>Bromus x ferroni</i> Mabilie                                       | Poaceae          | NL       | NL   | Acc  | NL   | Syn  | NL   | Syn | 2        |   |   |   |   |   | 1 |   |                |        | S          |            |
| <i>Bromus x pseudothominei</i> P.M. Sm.                               | Poaceae          | NL       | Syn  | Syn  | Acc  | AmUn | Syn  | NL  |          |   |   |   |   |   | 1 |   |                |        | S          |            |
| <i>Brugmansia x candida</i>                                           | Solanaceae       | NL       | NL   | NL   | NL   | Syn  | Syn  | Acc | 7        |   |   |   | 1 |   |   |   |                |        | S          | O          |
| <i>Brugmansia x insignis</i> (Barb.Rodr.) Lockwood ex E.Wade Davis    | Solanaceae       | NL       | NL   | NL   | NL   | Acc  | Acc  | Acc | 5        |   |   |   |   |   |   |   |                |        | S          | O          |
| <i>Citrus x aurantium</i> L.                                          | Rutaceae         | Acc      | Acc  | Acc  | Acc  | AmUn | Acc  | Acc | 122      |   | 1 |   | 1 | 1 |   |   |                |        | S          | C          |
| <i>Citrus x limon</i> (L.) Osbeck                                     | Rutaceae         | NL       | NL   | Acc  | Syn  | Syn  | Acc  | Syn | 24       |   |   |   | 1 |   | 1 |   |                |        | S          | C          |
| <i>Crocasmia x crocosmiiflora</i> (Lemoine) N.E.Br.                   | Iridaceae        | Acc      | NL   | Acc  | Acc  | Acc  | Acc  | Acc | 3        | 1 | 1 | 1 | 1 |   |   |   |                |        | S          | O          |
| <i>Dombeya x cayeuxii</i> André                                       | Malvaceae        | NL       | NL   | Acc  | AmUn | NL   | Acc  | Acc | 1        |   |   |   |   | 1 |   |   |                |        | S          | O          |
| <i>Kalanchoe x houghtonii</i> D.B.Ward.                               | Crassulaceae     | NL       | Acc  | Acc  | AmUn | AmUn | Syn  | NL  | 1        |   | 1 |   | 1 | 1 |   |   |                |        | S          | O          |
| <i>Kalanchoe x laetivirens</i> Desc.                                  | Crassulaceae     | Syn      | NL   | Acc  | NL   | Acc  | NL   | NL  | 1        |   |   |   |   |   |   |   |                |        | S          | O          |
| <i>Lotus berthelotii x maculatus</i>                                  | Fabaceae         | NL       | Acc  | NL   | NL   | AmUn | NL   | NL  |          |   | 1 | 1 | 1 | 1 |   |   | A              | S      |            |            |
| <i>Micromeria x angosturae</i> P.Pérez                                | Lamiaceae        | NL       | NL   | Acc  | Acc  | AmUn | Acc  | NL  | 1        |   |   |   |   | 1 |   |   |                | S      |            |            |
| <i>Micromeria x ayamosnae</i> Puppo & P.Pérez                         | Lamiaceae        | NL       | NL   | Acc  | NL   | AmUn | Acc  | NL  | 0        |   |   | 1 |   |   |   |   |                | S      |            |            |
| <i>Micromeria x benthamineolens</i> Sven                              | Lamiaceae        | NL       | NL   | Acc  | Acc  | AmUn | Acc  | NL  | 1        |   |   |   |   |   |   |   |                | S      |            |            |
| <i>Micromeria x broussonetii</i> A.Santos, A.Acev.-Rodr. & Reyes-Bet. | Lamiaceae        | NL       | Acc  | Acc  | NL   | AmUn | Acc  | NL  | 0        |   |   |   |   |   |   |   |                | S      |            |            |
| <i>Micromeria x confusa</i> G.Kunkel & P.Pérez                        | Lamiaceae        | NL       | NL   | Acc  | Acc  | AmUn | Acc  | NL  | 1        |   |   |   |   | 1 |   |   |                | S      |            |            |

| Species Name                                            | Family         | Atlantis | Muer | POWO | WFO  | COL  | GBIF | TRY | POWO Syn | H | P | G | T | C | F | L | Endemic Status | Native | Non native | Ornam Crop |
|---------------------------------------------------------|----------------|----------|------|------|------|------|------|-----|----------|---|---|---|---|---|---|---|----------------|--------|------------|------------|
| <i>Micromeria x garajonayii</i> Puppo & P.Pérez         | Lamiaceae      | NL       | NL   | Acc  | NL   | AmUn | Acc  | NL  | 0        |   |   | 1 |   |   |   |   |                | S      |            |            |
| <i>Micromeria x intermedia</i> G.Kunkel & P.Pérez       | Lamiaceae      | NL       | NL   | Acc  | Acc  | AmUn | Acc  | NL  | 1        |   |   |   |   | 1 |   |   |                | S      |            |            |
| <i>Micromeria x nogalesii</i> Puppo                     | Lamiaceae      | NL       | NL   | Acc  | Acc  | AmUn | Acc  | NL  | 1        |   |   |   |   |   | 1 | 1 |                | S      |            |            |
| <i>Micromeria x perez-pazii</i> G.Kunkel                | Lamiaceae      | NL       | NL   | Acc  | Acc  | AmUn | Acc  | NL  | 1        |   |   |   |   | 1 |   |   |                | S      |            |            |
| <i>Micromeria x preauxii</i> Webb & Berthel.            | Lamiaceae      | NL       | NL   | Acc  | Acc  | AmUn | Acc  | NL  | 1        |   |   |   |   | 1 |   |   |                | S      |            |            |
| <i>Micromeria x tagananensis</i> P.Pérez                | Lamiaceae      | NL       | NL   | Acc  | Acc  | AmUn | Acc  | NL  | 1        |   |   |   | 1 |   |   |   |                | S      |            |            |
| <i>Micromeria x tolomensis</i> Puppo & P.Pérez          | Lamiaceae      | NL       | NL   | Acc  | NL   | AmUn | Acc  | NL  | 0        |   |   | 1 |   |   |   |   |                | S      |            |            |
| <i>Micromeria x wildpretii</i> P.Pérez                  | Lamiaceae      | NL       | Acc  | Acc  | Acc  | AmUn | Acc  | NL  | 1        |   |   |   | 1 |   |   |   |                | S      |            |            |
| <i>Petunia x atkinsiana</i> (Sweet) D.Don ex W.H.Baxter | Solanaceae     | NL       | NL   | Acc  | AmUn | Syn  | Acc  | Acc | 8        |   | 1 |   | 1 | 1 |   |   |                |        | S          | O          |
| <i>Populus x canadensis</i> Moench                      | Salicaceae     | NL       | NL   | Acc  | Acc  | Acc  | Acc  | Acc | 15       |   |   |   | 1 |   |   |   |                |        | S          | O          |
| <i>Tecoma x smithii</i> Hort.                           | Bignoniaceae   | NL       | Acc  | NL   | AmUn | AmUn | Acc  | NL  |          |   |   |   |   | 1 |   |   |                |        | S          | O          |
| <i>Veronica x andersonii</i> Lindl. & Paxton            | Plantaginaceae | NL       | NL   | Acc  | Acc  | NL   | Acc  | Syn | 1        |   |   |   |   |   |   |   |                |        | S          | O          |

## 4 Garden Plants Only

| Species Name                                                                  | Family           | Atlantis | Muer | POWO | WFO | COL  | GBIF | TRY | POWO Syn | H | P | G | T | C | F | L | Endemic Status | Native | Non native | Ornam Crop |
|-------------------------------------------------------------------------------|------------------|----------|------|------|-----|------|------|-----|----------|---|---|---|---|---|---|---|----------------|--------|------------|------------|
| <i>Acalypha brachystachya</i> Hornem.                                         | Euphorbiaceae    | Acc      | NL   | Acc  | Acc | Acc  | Acc  | Acc | 4        |   | 1 |   | 1 |   |   |   |                |        | S          | O          |
| <i>Acalypha hispida</i> Burm.f.                                               | Euphorbiaceae    | NL       | NL   | Acc  | Acc | Acc  | Acc  | Acc | 4        |   |   |   |   | 1 |   |   |                |        | S          | O          |
| <i>Acalypha wilkesiana</i> Müll.Arg.                                          | Euphorbiaceae    | NL       | NL   | Acc  | Acc | Acc  | Acc  | Acc | 9        |   | 1 | 1 | 1 | 1 | 1 | 1 |                |        | S          | O          |
| <i>Acanthus spinosus</i> L.                                                   | Acanthaceae      | NL       | NL   | Acc  | Acc | Acc  | Acc  | Acc | 1        |   |   |   |   |   |   |   |                |        | S          | O          |
| <i>Acoelorrhaphe wrightii</i> (Griseb. & H.Wendl.)<br>H.Wendl. ex Becc.       | Arecaceae        | NL       | NL   | Acc  | Acc | Acc  | Acc  | Acc | 13       |   |   |   |   | 1 |   |   |                |        | S          | O          |
| <i>Actinidia chinensis</i> Planch. var. <i>deliciosa</i> (A.Chev.)<br>A.Chev. | Actinidiaceae    | NL       | NL   | Acc  | Acc | Syn  | Acc  | NL  | 8        |   | 1 |   | 1 | 1 |   |   |                |        | S          | C          |
| <i>Adenium obesum</i> (Forssk.) Roem. & Schult.                               | Apocynaceae      | NL       | NL   | Acc  | Acc | Acc  | Acc  | Acc | 6        |   |   |   |   |   | 1 |   |                |        | S          | O          |
| <i>Agave xylonacantha</i> Salm-Dyck                                           | Asparagaceae     | NL       | NL   | Acc  | Acc | Acc  | Acc  | Acc | 9        |   |   |   |   | 1 |   |   |                |        | S          | O          |
| <i>Ajania pacifica</i> (Nakai) K.Bremer & Humphries                           | Asteraceae       | NL       | NL   | Acc  | Acc | Acc  | Acc  | NL  | 3        |   |   |   |   | 1 |   |   |                |        | S          | O          |
| <i>Albizia julibrissin</i> Durazz.                                            | Fabaceae         | NL       | NL   | Acc  | Acc | Acc  | Acc  | Acc | 4        |   |   |   | 1 |   |   |   |                |        | S          | O          |
| <i>Aleurites moluccanus</i> (L.) Willd.                                       | Fabaceae         | NL       | NL   | Acc  | Acc | Acc  | Acc  | Acc | 21       |   |   |   | 1 | 1 |   |   |                |        | S          | O          |
| <i>Allamanda cathartica</i> L.                                                | Apocynaceae      | NL       | NL   | Acc  | Acc | Acc  | Acc  | Acc | 10       |   |   |   |   | 1 | 1 |   |                |        | S          | O          |
| <i>Allamanda schottii</i> Pohl                                                | Apocynaceae      | NL       | NL   | Acc  | Acc | Acc  | Acc  | Acc | 5        |   |   |   | 1 | 1 | 1 |   |                |        | S          | O          |
| <i>Allium cepa</i> L.                                                         | Amaryllidaceae   | Acc      | Acc  | Acc  | Acc | Acc  | Acc  | Acc | 21       |   |   | 1 | 1 | 1 | 1 | 1 |                |        | P          | C          |
| <i>Allium sativum</i> L.                                                      | Amaryllidaceae   | Acc      | Acc  | Acc  | Acc | Acc  | Acc  | Acc | 10       |   |   |   |   | 1 |   |   |                |        | P          | C          |
| <i>Alocasia odora</i> (G.Lodd.) Spach                                         | Araceae          | NL       | NL   | Acc  | Acc | Acc  | Acc  | Acc | 6        |   |   |   |   | 1 |   |   |                |        | S          | O          |
| <i>Alpinia zerumbet</i> (Pers.) B.L.Burt & R.M.Sm.                            | Zingiberaceae    | Acc      | Acc  | Acc  | Acc | Acc  | Acc  | Acc | 13       |   |   |   | 1 | 1 |   |   |                |        | S          | O          |
| <i>Alstroemeria ligtu</i> L.                                                  | Alstroemeriaceae | Acc      | NL   | Acc  | Acc | Acc  | Acc  | Acc | 0        |   | 1 |   |   | 1 |   |   |                |        | S          | O          |
| <i>Alstroemeria pelegrina</i> L.                                              | Alstroemeriaceae | Syn      | Syn  | Acc  | Acc | Acc  | Acc  | Acc | 5        |   |   |   | 1 |   |   |   |                |        | S          | O          |
| <i>Alstroemeria x hybrida</i> hort.                                           | Alstroemeriaceae | NL       | Acc  | NL   | NL  | AmUn | Acc  | NL  |          |   |   |   | 1 | 1 |   |   |                |        | S          | O          |
| <i>Alternanthera brasiliana</i> (L.) Kuntze                                   | Amaranthaceae    | NL       | NL   | Acc  | Acc | Acc  | Acc  | Acc | 28       |   |   |   |   | 1 |   |   |                |        | S          | O          |



| Species Name                                                      | Family            | Atlantis | Muer | POWO | WFO | COL | GBIF | TRY | POWO Syn | H | P | G | T | C | F | L | Endemic Status | Native | Non native | Ornam Crop |
|-------------------------------------------------------------------|-------------------|----------|------|------|-----|-----|------|-----|----------|---|---|---|---|---|---|---|----------------|--------|------------|------------|
| <i>Amphilophium crucigerum</i> (L.) L.G.Lohmann                   | Bignoniaceae      | NL       | NL   | Acc  | Acc | Acc | Acc  | Acc | 39       |   |   |   |   |   |   |   |                |        | S          | O          |
| <i>Angelonia biflora</i> Benth.                                   | Asparagaceae      | NL       | NL   | Acc  | Acc | Acc | Acc  | Acc | 1        |   |   |   |   | 1 |   |   |                |        | S          | O          |
| <i>Araucaria bidwillii</i> Hook                                   | Auracariaceae     | NL       | NL   | Acc  | Acc | Acc | Acc  | Acc | 2        |   |   |   | 1 |   |   |   |                |        | S          | O          |
| <i>Araucaria cunninghamii</i> Mudie                               | Auracariaceae     | NL       | NL   | Acc  | Acc | Acc | Acc  | Acc | 2        |   |   |   |   | 1 |   |   |                |        | S          | O          |
| <i>Araucaria heterophylla</i> (Salisb.) Franco                    | Auracariaceae     | NL       | NL   | Acc  | Acc | Acc | Acc  | Acc | 3        |   | 1 | 1 | 1 | 1 | 1 | 1 |                |        | S          | O          |
| <i>Archontophoenix alexandrae</i> (F.Muell.) H.Wendl. & Drude     | Arecaceae         | NL       | NL   | Acc  | Acc | Acc | Acc  | Acc | 7        |   |   |   | 1 | 1 |   |   |                |        | S          | O          |
| <i>Archontophoenix cunninghamiana</i> (H.Wendl.) H.Wendl. & Drude | Arecaceae         | NL       | NL   | Acc  | Acc | Acc | Acc  | Acc | 5        |   |   |   | 1 |   |   |   |                |        | S          | O          |
| <i>Aristolochia gigantea</i> Mart. & Zucc. not Hook               | Aristolochinaceae | NL       | NL   | Acc  | Acc | Acc | Acc  | Acc | 1        | 1 |   |   |   |   |   |   |                |        | S          | O          |
| <i>Aristolochia grandiflora</i> Sw.                               | Aristolochinaceae | NL       | NL   | Acc  | Acc | Acc | Acc  | Acc | 7        |   | 1 |   | 1 |   |   |   |                |        | S          | O          |
| <i>Artemisia absinthium</i> L.                                    | Asteraceae        | NL       | NL   | Acc  | Acc | Acc | Acc  | Acc | 16       |   |   |   |   | 1 |   |   |                |        | S          | O          |
| <i>Artocarpus altilis</i> (Parkinson) Fosberg                     | Moraceae          | NL       | NL   | Acc  | Acc | Acc | Acc  | Acc | 20       | 1 | 1 |   | 1 | 1 |   |   |                |        | S          | C          |
| <i>Artocarpus heterophyllus</i> Lam.                              | Moraceae          | NL       | NL   | Acc  | Acc | Acc | Acc  | Acc | 7        |   |   |   | 1 |   |   |   |                |        | S          | C          |
| <i>Asparagus densiflorus</i> L.                                   | Asparagaceae      | NL       | NL   | Acc  | Acc | Acc | Acc  | Acc | 4        |   |   |   |   | 1 |   |   |                |        | S          | O          |
| <i>Bauhinia forficata</i> Link                                    | Fabaceae          | NL       | NL   | Acc  | Acc | Acc | Acc  | Acc | 14       |   |   |   |   | 1 |   |   |                |        | S          | O          |
| <i>Bauhinia purpurea</i> L.                                       | Fabaceae          | NL       | NL   | Acc  | Acc | Acc | Acc  | Acc | 14       |   |   |   | 1 |   |   |   |                |        | S          | O          |
| <i>Bauhinia variegata</i> L.                                      | Fabaceae          | NL       | NL   | Acc  | Acc | Acc | Acc  | Acc | 13       |   | 1 |   | 1 | 1 |   |   |                |        | S          | O          |
| <i>Beaucarnea recurvata</i> (K.Koch & Fintelm.) Lem.              | Asparagaceae      | NL       | NL   | Acc  | Acc | Acc | Acc  | Acc | 7        |   |   |   |   | 1 |   |   |                |        | S          | O          |
| <i>Billbergia nutans</i> H.Wendl. ex Regel                        | Bromeliaceae      | NL       | NL   | Acc  | Acc | Acc | Acc  | Acc | 7        |   |   |   |   | 1 |   |   |                |        | S          | O          |
| <i>Bismarckia nobilis</i> Hildebr. & H. Wendl.                    | Arecaceae         | NL       | NL   | Acc  | Acc | Acc | Acc  | Acc | 1        |   |   |   | 1 | 1 |   |   |                |        | S          | O          |
| <i>Borassus aethiopum</i> Mart.                                   | Arecaceae         | NL       | NL   | Acc  | Acc | Acc | Acc  | Acc | 1        |   |   |   |   | 1 |   |   |                |        | S          | O          |
| <i>Bougainvillea glabra</i> Choisy                                | Nyctaginaceae     | Acc      | Acc  | Acc  | Acc | Acc | Acc  | Acc | 12       |   |   | 1 |   | 1 |   |   |                |        | S          | O          |
| <i>Bougainvillea spectabilis</i> Willd.                           | Nyctaginaceae     | NL       | NL   | Acc  | Acc | Acc | Acc  | Acc | 11       |   | 1 | 1 | 1 | 1 |   |   |                |        | S          | O          |
| <i>Brachychiton acerifolius</i> (A.Cunn. ex G.Don) F.Muell.       | Malvaceae         | NL       | NL   | Acc  | Acc | Acc | Acc  | Acc | 3        |   |   |   | 1 | 1 | 1 |   |                |        | S          | O          |

| Species Name                                                       | Family           | Atlantis | Muer | POWO | WFO | COL | GBIF | TRY | POWO Syn | H | P | G | T | C | F | L | Endemic Status | Native | Non native | Ornam Crop |
|--------------------------------------------------------------------|------------------|----------|------|------|-----|-----|------|-----|----------|---|---|---|---|---|---|---|----------------|--------|------------|------------|
| <i>Brachychiton discolor</i> F.J.Muell.                            | Malvaceae        | NL       | NL   | Acc  | Acc | Acc | Acc  | Acc | 5        | 1 | 1 |   | 1 | 1 | 1 |   |                |        | S          | O          |
| <i>Brachychiton diversifolius</i> R.Br.                            | Malvaceae        | NL       | NL   | Acc  | Acc | Acc | Acc  | Acc | 5        |   |   |   | 1 |   |   |   |                |        | S          | O          |
| <i>Brachychiton populneus</i> (Schott & Endl.) R.Br.               | Malvaceae        | NL       | NL   | Acc  | Acc | Acc | Acc  | Acc | 5        |   | 1 |   | 1 | 1 |   |   |                |        | S          | O          |
| <i>Brahea armata</i> S.Watson                                      | Arecaceae        | NL       | NL   | Acc  | Acc | Acc | Acc  | Acc | 11       |   |   |   | 1 | 1 |   |   |                |        | S          | O          |
| <i>Breynia disticha</i> J.R.Forst. & G.Forst.                      | Phyllanthaceae   | NL       | NL   | Acc  | Acc | Acc | Acc  | Acc | 5        |   |   |   | 1 | 1 |   |   |                |        | S          | O          |
| <i>Brugmansia arborea</i> (L.) Sweet                               | Solanaceae       | NL       | NL   | Acc  | Acc | Acc | Syn  | Acc | 8        |   |   |   | 1 | 1 |   |   |                |        | S          | O          |
| <i>Brugmansia sanguinea</i> (Ruiz & Pav.) D.Don                    | Solanaceae       | NL       | NL   | Acc  | Acc | Acc | Acc  | Acc | 5        |   |   |   | 1 |   |   |   |                |        | S          | O          |
| <i>Brugmansia suaveolens</i> (Willd.) Sweet                        | Solanaceae       | Acc      | Acc  | Acc  | Acc | Acc | Acc  | Acc | 5        |   | 1 |   | 1 |   |   |   |                |        | S          | O          |
| <i>Brugmansia versicolor</i> Lagerh.                               | Solanaceae       | NL       | NL   | Acc  | Acc | Acc | Acc  | Acc | 1        |   |   |   | 1 | 1 |   |   |                |        | S          | O          |
| <i>Brugmansia x candida</i>                                        | Solanaceae       | NL       | NL   | NL   | NL  | Syn | Syn  | Acc | 7        |   |   |   | 1 |   |   |   |                |        | S          | O          |
| <i>Brugmansia x insignis</i> (Barb.Rodr.) Lockwood ex E.Wade Davis | Solanaceae       | NL       | NL   | NL   | NL  | Acc | Acc  | Acc | 5        |   |   |   |   |   |   |   |                |        | S          | O          |
| <i>Buddleja davidii</i> Franch.                                    | Scrophulariaceae | NL       | NL   | Acc  | Acc | Acc | Acc  | Acc | 5        |   | 1 |   |   |   |   |   |                |        | S          | O          |
| <i>Butia capitata</i> (Mart.) Becc.                                | Arecaceae        | NL       | NL   | Acc  | Acc | Acc | Acc  | Acc | 10       |   |   |   | 1 |   |   |   |                |        | S          | O          |
| <i>Caesalpinia pulcherrima</i> (L.) Sw.                            | Fabaceae         | NL       | NL   | Acc  | Acc | Acc | Acc  | Acc | 11       |   |   | 1 | 1 |   | 1 |   |                |        | S          | O          |
| <i>Calibrachoa parviflora</i> (Juss.) D'Arcy                       | Solanaceae       | Acc      | Acc  | Acc  | Acc | Acc | Acc  | Acc | 17       |   |   |   |   | 1 |   |   |                |        | S          | O          |
| <i>Calliandra haematocephala</i> Hassk.                            | Fabaceae         | NL       | NL   | Acc  | Acc | Acc | Acc  | Acc | 2        |   |   |   | 1 |   |   |   |                |        | S          | O          |
| <i>Calliandra tweediei</i> Benth.                                  | Fabaceae         | Acc      | Acc  | Acc  | Acc | Acc | Syn  | NL  | 5        |   |   | 1 | 1 | 1 |   |   |                |        | S          | O          |
| <i>Callianthe megapota mica</i> (A. Spreng.) Dorr                  | Malvaceae        | NL       | NL   | Syn  | Acc | Acc | NL   | Acc | 4        |   |   |   | 1 |   |   |   |                |        | S          | O          |
| <i>Callistemon viminalis</i> (Sol. ex Gaertn.) G.Don               | Myrtaceae        | Acc      | NL   | Syn  | Acc | Acc | Acc  | Acc | 2        |   |   |   | 1 |   |   |   |                |        | S          | O          |
| <i>Camellia japonica</i> L.                                        | Theaceae         | NL       | NL   | Acc  | Acc | Acc | Acc  | Acc | 13       |   | 1 |   |   |   |   |   |                |        | S          | O          |
| <i>Campsis radicans</i> (L.) Seem.                                 | Bignoniaceae     | NL       | NL   | Acc  | Acc | Acc | Acc  | Acc | 11       |   |   |   | 1 | 1 |   |   |                |        | S          | O          |
| <i>Carissa macrocarpa</i> (Eckl.) A.DC.                            | Apcynaceae       | NL       | NL   | Acc  | Acc | Acc | Acc  | Acc | 9        |   |   |   | 1 | 1 | 1 | 1 |                |        | S          | O          |
| <i>Carnegiea gigantea</i> (Engelm.) Britton & Rose                 | Cactaceae        | NL       | NL   | Acc  | Acc | Acc | Acc  | Acc | 5        |   |   |   |   | 1 |   |   |                |        | S          | O          |
| <i>Caryota mitis</i> Lour.                                         | Arecaceae        | NL       | NL   | Acc  | Acc | Acc | Acc  | Acc | 9        |   | 1 |   | 1 |   |   |   |                |        | S          | O          |

| Species Name                                                   | Family         | Atlantis | Muer | POWO | WFO | COL | GBIF | TRY | POWO Syn | H | P | G | T | C | F | L | Endemic Status | Native | Non native | Ornam Crop |
|----------------------------------------------------------------|----------------|----------|------|------|-----|-----|------|-----|----------|---|---|---|---|---|---|---|----------------|--------|------------|------------|
| <i>Caryota urens</i> L.                                        | Arecaceae      | NL       | NL   | Acc  | Acc | Acc | Acc  | Acc | 0        |   |   |   | 1 | 1 |   |   |                |        | S          | O          |
| <i>Casimiroa edulis</i> La Llave                               | Rutaceae       | NL       | NL   | Acc  | Acc | Acc | Acc  | Acc | 11       |   |   |   |   | 1 |   |   |                |        | S          | C          |
| <i>Castanospermum australe</i> A.Cunn. ex Mudie                | Fabaceae       | NL       | NL   | Acc  | Acc | Acc | Acc  | Acc | 5        |   |   |   | 1 |   |   |   |                |        | S          | O          |
| <i>Ceiba speciosa</i> (A.St.-Hil., A.Juss. & Cambess.) Ravenna | Malvaceae      | NL       | NL   | Acc  | Acc | Acc | Acc  | Acc | 4        |   |   |   |   | 1 |   |   |                |        | S          | O          |
| <i>Celosia argentea</i> L.                                     | Amaranthaceae  | NL       | NL   | Acc  | Acc | Acc | Acc  | Acc | 33       |   |   |   | 1 | 1 |   |   |                |        | S          | O          |
| <i>Cercis siliquastrum</i> L.                                  | Fabaceae       | NL       | NL   | Acc  | Acc | Acc | Acc  | Acc | 1        |   |   |   |   | 1 |   |   |                |        | S          | O          |
| <i>Cestrum elegans</i> (Brongn. ex Neumann) Schltdl.           | Solanaceae     | NL       | NL   | Acc  | Acc | Acc | Acc  | Acc | 13       |   |   |   |   | 1 |   |   |                |        | S          | O          |
| <i>Cestrum nocturnum</i> L.                                    | Solanaceae     | NL       | NL   | Acc  | Acc | Acc | Acc  | Acc | 8        |   |   |   | 1 | 1 |   |   |                |        | S          | O          |
| <i>Chamaedorea costaricana</i> Oerst                           | Arecaeae       | NL       | NL   | Acc  | Acc | Acc | Acc  | Acc | 7        |   |   |   | 1 |   |   |   |                |        | S          | O          |
| <i>Chamaedorea elegans</i> Mart.                               | Arecaeae       | NL       | NL   | Acc  | Acc | Acc | Acc  | Acc | 10       |   |   |   | 1 |   |   |   |                |        | S          | O          |
| <i>Chamaedorea ernesti-augusti</i> H.Wendl.                    | Arecaeae       | NL       | NL   | Acc  | Acc | Acc | Acc  | Acc | 7        |   |   |   | 1 |   |   |   |                |        | S          | O          |
| <i>Chamaedorea metallica</i> O.F.Cook ex H.E.Moore             | Arecaeae       | NL       | NL   | Acc  | Acc | Acc | Acc  | Acc | 0        |   |   |   | 1 |   |   |   |                |        | S          | O          |
| <i>Chamaedorea seifrizii</i> Burret                            | Arecaeae       | NL       | NL   | Acc  | Acc | Acc | Acc  | Acc | 3        |   |   |   | 1 |   |   |   |                |        | S          | O          |
| <i>Chambeyronia macrocarpa</i> (Brongn.) Vieill. ex Becc.      | Arecaeae       | NL       | NL   | Acc  | Acc | Acc | Acc  | Acc | 4        |   |   |   | 1 |   |   |   |                |        | S          | O          |
| <i>Cibotium schiedeii</i> Schltdl. & Cham.                     | Cyatheaceae    | NL       | NL   | Acc  | Acc | Acc | Acc  | Acc | 1        |   |   |   | 1 |   |   |   |                |        | S          | O          |
| <i>Cichorium endivia</i> L.                                    | Asteraceae     | NL       | Acc  | Acc  | Acc | Acc | Acc  | Acc | 4        |   | 1 | 1 | 1 | 1 |   |   |                |        | S          | C          |
| <i>Citharexylum spinosum</i> L.                                | Verbenaceae    | NL       | NL   | Acc  | Acc | Acc | Acc  | Acc | 11       |   |   |   |   | 1 |   |   |                |        | S          | O          |
| <i>Clerodendrum speciosissimum</i> Van Geert ex Drapiez        | Lamiaceae      | NL       | NL   | Acc  | Acc | Acc | Acc  | Acc | 7        |   | 1 |   |   | 1 |   |   |                |        | S          | O          |
| <i>Clerodendrum splendens</i> G.Don                            | Lamiaceae      | NL       | NL   | Acc  | Acc | Acc | Acc  | Acc | 4        |   |   | 1 |   |   |   |   |                |        | S          | O          |
| <i>Clivia miniata</i> (Lindl.) Verschaff.                      | Amaryllidaceae | NL       | NL   | Acc  | Acc | Acc | Acc  | Acc | 4        |   |   |   | 1 | 1 |   |   |                |        | S          | O          |
| <i>Coccothrinax barbadensis</i> (Lodd. ex Mart.) Becc.         | Arecaeae       | NL       | NL   | Acc  | Acc | Acc | Acc  | Acc | 15       |   |   |   | 1 |   |   |   |                |        | S          | O          |
| <i>Cocos nucifera</i> L.                                       | Arecaceae      | NL       | NL   | Acc  | Acc | Acc | Acc  | Acc | 7        |   | 1 |   | 1 |   | 1 |   |                |        | S          | O          |
| <i>Coleus scutellarioides</i> (L.) Benth.                      | Lamiaceae      | NL       | NL   | Acc  | Syn | Acc | Acc  | Syn | 62       |   |   |   |   | 1 |   |   |                |        | S          | O          |

| Species Name                                                                 | Family          | Atlantis | Muer | POWO | WFO  | COL | GBIF | TRY | POWO Syn | H | P | G | T | C | F | L | Endemic Status | Native | Non native | Ornam Crop |
|------------------------------------------------------------------------------|-----------------|----------|------|------|------|-----|------|-----|----------|---|---|---|---|---|---|---|----------------|--------|------------|------------|
| <i>Colletia paradoxa</i> (Spreng.) Escal.                                    | Rhamnaceae      | NL       | NL   | Acc  | Acc  | Acc | Acc  | Acc | 5        |   |   |   | 1 | 1 |   |   |                |        | S          | O          |
| <i>Copernicia alba</i> Morong                                                | Arecaeae        | NL       | NL   | Acc  | Acc  | Acc | Acc  | Acc | 4        |   |   |   | 1 |   |   |   |                |        | S          | O          |
| <i>Coprosma repens</i> A. Rich.                                              | Rubiaceae       | NL       | NL   | Acc  | Acc  | Acc | Acc  | Acc | 2        |   |   |   | 1 |   |   |   |                |        | S          | O          |
| <i>Cordia sebestena</i> L.                                                   | Boraginaceae    | NL       | NL   | Acc  | Acc  | Acc | Acc  | Acc | 6        |   |   |   |   | 1 |   |   |                |        | S          | O          |
| <i>Cordyline australis</i> (G.Forst.) Endl.                                  | Asparagaceae    | NL       | NL   | Acc  | Acc  | Acc | Acc  | Acc | 13       |   |   |   | 1 |   |   |   |                |        | S          | O          |
| <i>Corynocarpus laevigatus</i> J.R.Forst. & G.Forst.                         | Corynocarpaceae | NL       | NL   | Acc  | Acc  | Acc | Acc  | Acc |          |   |   |   |   | 1 |   |   |                |        | S          | O          |
| <i>Crassula lactea</i> Aiton                                                 | Crassulaceae    | NL       | NL   | Acc  | Acc  | Acc | Acc  | NL  | 1        |   |   |   |   | 1 |   |   |                |        | S          | O          |
| <i>Crescentia cujete</i> L.                                                  | Bignoniaceae    | NL       | NL   | Acc  | Acc  | Acc | Acc  | Acc | 10       |   | 1 |   |   |   |   |   |                |        | S          | O          |
| <i>Crinum asiaticum</i> L. var. <i>pedunculatum</i> (R.Br.) Fosberg & Sachet | Amaryllidaceae  | NL       | NL   | Acc  | Acc  | Acc | Acc  | NL  | 2        |   |   |   |   | 1 |   |   |                |        | S          | O          |
| <i>Crinum moorei</i> Hook f.                                                 | Amaryllidaceae  | NL       | NL   | Acc  | Acc  | Acc | Acc  | Acc | 8        |   |   |   | 1 |   |   |   |                |        | S          | O          |
| <i>Cryptostegia madagascariensis</i> Bojer ex Decne.                         | Apocynaceae     | NL       | NL   | Acc  | Acc  | Acc | Acc  | Acc | 3        |   |   |   | 1 |   |   |   |                |        | S          | O          |
| <i>Cucumis melo</i> L.                                                       | Cucurbitaceae   | NL       | NL   | Acc  | Acc  | Acc | Acc  | Acc | 104      | 1 | 1 | 1 | 1 | 1 | 1 | 1 |                |        | S          | C          |
| <i>Cucumis sativus</i> L.                                                    | Cucurbitaceae   | NL       | NL   | Acc  | Acc  | Acc | Acc  | Acc | 7        |   | 1 | 1 | 1 | 1 |   |   |                |        | S          | C          |
| <i>Cuphea ignea</i> A.DC.                                                    | Lythraceae      | NL       | NL   | Acc  | Acc  | Acc | Acc  | Acc | 7        |   |   |   | 1 | 1 |   |   |                |        | S          | O          |
| <i>Cycas circinalis</i> L.                                                   | Cycadaceae      | NL       | NL   | Acc  | Acc  | Acc | Acc  | Acc | 3        |   |   |   |   | 1 |   |   |                |        | S          | O          |
| <i>Cycas revoluta</i> Thunb.                                                 | Cycadaceae      | NL       | NL   | Acc  | Acc  | Acc | Acc  | Acc | 3        |   | 1 |   |   | 1 |   |   |                |        | S          | O          |
| <i>Cyperus papyrus</i> L.                                                    | Cyperaceae      | NL       | NL   | Acc  | Acc  | Acc | Acc  | Acc | 1        |   | 1 |   | 1 |   |   |   |                |        | S          | O          |
| <i>Dictyosperma album</i> (Bory) Scheff.                                     | Arecaceae       | NL       | NL   | Acc  | Acc  | Acc | Acc  | Acc | 2        |   |   |   | 1 | 1 |   |   |                |        | S          | O          |
| <i>Dombeya wallichii</i> (Lindl.) K.Schum.                                   | Malvaceae       | NL       | NL   | Acc  | Acc  | Syn | Acc  | NL  | 5        |   | 1 |   | 1 | 1 |   |   |                |        | S          | O          |
| <i>Dombeya x cayeuxii</i> André                                              | Malvaceae       | NL       | NL   | Acc  | AmUn | NL  | Acc  | Acc | 1        |   |   |   |   | 1 |   |   |                |        | S          | O          |
| <i>Dovyalis caffra</i> (Hook.f. & Harv.) Warb.                               | Salicaceae      | NL       | NL   | Acc  | Syn  | Acc | Acc  | Acc | 2        |   |   |   |   | 1 |   |   |                |        | S          | O          |
| <i>Dracaena reflexa</i> Lam.                                                 | Asparagaceae    | NL       | NL   | Acc  | Acc  | Acc | Acc  | Acc | 4        |   |   |   |   | 1 |   |   |                |        | S          | O          |
| <i>Dracaena stuckyi</i> (God.-Leb.) Byng & Christenh.                        | Asparagaceae    | NL       | NL   | Acc  | Syn  | NL  | Syn  | Syn | 3        |   |   |   |   | 1 |   |   |                |        | S          | O          |
| <i>Dracaena trifasciata</i> (Prain) Mabb.                                    | Asparagaceae    | Syn      | Syn  | Acc  | Syn  | Acc | NL   | Syn | 4        |   | 1 | 1 | 1 | 1 | 1 | 1 |                |        | S          | O          |

| Species Name                                             | Family        | Atlantis | Muer | POWO | WFO | COL | GBIF | TRY | POWO Syn | H | P | G | T | C | F | L | Endemic Status | Native | Non native | Ornam Crop |
|----------------------------------------------------------|---------------|----------|------|------|-----|-----|------|-----|----------|---|---|---|---|---|---|---|----------------|--------|------------|------------|
| <i>Dyopsis decaryi</i> (Jum.) Beentje & J.Dransf.        | Arecaeae      | NL       | NL   | Acc  | Acc | Acc | Acc  | Acc | 1        |   | 1 |   | 1 | 1 |   |   |                |        | S          | O          |
| <i>Dyopsis leptocheilios</i> (Hodel) Beentje & J.Dransf. | Arecaeae      | NL       | NL   | Acc  | Acc | Acc | Acc  | Acc | 1        |   |   |   | 1 |   |   |   |                |        | S          | O          |
| <i>Dyopsis lutescens</i> (H.Wendl.) Beentje & J.Dransf.  | Arecaeae      | NL       | NL   | Acc  | Acc | Acc | Acc  | Acc | 2        |   |   |   | 1 | 1 |   |   |                |        | S          | O          |
| <i>Echium nervosum</i> W.T.Aiton                         | Boraginaceae  | NL       | NL   | Acc  | Acc | Acc | Acc  | Acc | 0        |   |   |   |   | 1 |   |   |                |        | S          | O          |
| <i>Elaeis guineensis</i> Jacq.                           | Arecaeae      | NL       | NL   | Acc  | Acc | Acc | Acc  | Acc | 1        |   |   |   | 1 |   |   |   |                |        | S          | O          |
| <i>Epipremnum aureum</i> (Linden & André) G.S.Bunting    | Araceae       | NL       | NL   | Acc  | Acc | Acc | Acc  | Acc | 4        |   |   |   |   | 1 |   |   |                |        | S          | O          |
| <i>Erythrina caffra</i> Thunb.                           | Fabaceae      | NL       | NL   | Acc  | Acc | Acc | Acc  | Acc | 7        |   |   |   | 1 | 1 |   |   |                |        | S          | O          |
| <i>Espostoa lanata</i> (Kunth) Britton & Rose            | Cactaceae     | NL       | NL   | Acc  | Acc | Acc | Acc  | Acc | 23       |   |   |   |   | 1 |   |   |                |        | S          | O          |
| <i>Eugenia uniflora</i> L.                               | Myrtaceae     | NL       | NL   | Acc  | Acc | Acc | Acc  | Acc | 42       |   | 1 | 1 | 1 |   |   |   |                |        | S          | O          |
| <i>Euphorbia ingens</i> E.Mey. ex Boiss.                 | Euphorbiaceae | NL       | NL   | Acc  | Acc | Acc | Acc  | Acc | 7        |   | 1 | 1 |   | 1 | 1 | 1 |                |        | S          | O          |
| <i>Euphorbia lactea</i> Haw.                             | Euphorbiaceae | NL       | NL   | Acc  | Acc | Acc | Acc  | Acc | 0        |   |   |   |   | 1 |   |   |                |        | S          | O          |
| <i>Euphorbia resinifera</i> O.Berg                       | Euphorbiaceae | NL       | NL   | Acc  | Acc | Acc | Acc  | Acc | 2        |   |   |   |   | 1 |   |   |                |        | S          | O          |
| <i>Euryops pectinatus</i> Cass.                          | Asteraceae    | NL       | NL   | Acc  | Acc | Acc | Acc  | Acc | 0        |   |   |   |   | 1 |   |   |                |        | S          | O          |
| <i>Feijoa sellowiana</i> (O.Berg) O.Berg                 | Myrtaceae     | NL       | NL   | Acc  | Syn | Acc | Acc  | Syn | 8        |   | 1 |   | 1 |   |   |   |                |        | S          | O          |
| <i>Ficus altissima</i> Blume                             | Moraceae      | NL       | NL   | Acc  | Acc | Acc | Acc  | Acc | 6        |   |   |   |   | 1 |   |   |                |        | S          | O          |
| <i>Ficus aspera</i> G. Forst.                            | Moraceae      | NL       | NL   | Acc  | Acc | Acc | Acc  | Acc | 2        |   |   |   | 1 |   |   |   |                |        | S          | O          |
| <i>Ficus auriculata</i> Lour.                            | Moraceae      | NL       | NL   | Acc  | Acc | Acc | Acc  | Acc | 11       |   |   |   | 1 |   |   |   |                |        | S          | O          |
| <i>Ficus benghalensis</i> L.                             | Moraceae      | NL       | NL   | Acc  | Acc | Acc | Acc  | Acc | 13       |   |   |   |   | 1 |   |   |                |        | S          | O          |
| <i>Ficus benjamina</i> L.                                | Moraceae      | NL       | NL   | Acc  | Acc | Acc | Acc  | Acc | 27       |   |   |   |   | 1 | 1 |   |                |        | S          | O          |
| <i>Ficus lyrata</i> Warb.                                | Moraceae      | Acc      | Syn  | Acc  | Acc | Acc | Acc  | Acc | 1        |   | 1 |   | 1 | 1 |   |   |                |        | S          | O          |
| <i>Ficus macrophylla</i> Pers.                           | Moraceae      | NL       | NL   | Acc  | Acc | Acc | Acc  | Acc | 9        |   |   |   | 1 | 1 |   |   |                |        | S          | O          |
| <i>Ficus nymphaeifolia</i> Mill.                         | Moraceae      | NL       | NL   | Acc  | Acc | Acc | Acc  | Acc | 8        |   |   |   |   | 1 |   |   |                |        | S          | O          |
| <i>Ficus pandurata</i> Hance                             | Moraceae      | NL       | Acc  | Acc  | Acc | Acc | Acc  | Acc | 0        |   |   |   | 1 |   |   |   |                |        | S          | O          |
| <i>Ficus pumila</i> L.                                   | Moraceae      | Acc      | Acc  | Acc  | Acc | Acc | Acc  | Acc | 11       |   |   |   |   | 1 |   |   |                |        | S          | O          |

| Species Name                                         | Family         | Atlantis | Muer | POWO | WFO | COL | GBIF | TRY | POWO Syn | H | P | G | T | C | F | L | Endemic Status | Native | Non native | Ornam Crop |
|------------------------------------------------------|----------------|----------|------|------|-----|-----|------|-----|----------|---|---|---|---|---|---|---|----------------|--------|------------|------------|
| <i>Ficus saussureana</i> DC.                         | Moraceae       | NL       | NL   | Acc  | Acc | Acc | Acc  | Acc | 14       |   |   |   |   | 1 |   |   |                |        | S          | O          |
| <i>Ficus sycomorus</i> L.                            | Moraceae       | NL       | NL   | Acc  | Acc | Acc | Acc  | Acc | 13       |   |   |   | 1 |   |   |   |                |        | S          | O          |
| <i>Gardenia cornuta</i> Hemsl.                       | Rubiaceae      | NL       | NL   | Acc  | Acc | Acc | Acc  | Acc | 0        |   |   |   | 1 |   |   |   |                |        | S          | O          |
| <i>Gardenia thunbergia</i> Thunb.                    | Rubiaceae      | NL       | NL   | Acc  | Acc | Acc | Acc  | Acc | 9        |   |   |   | 1 |   |   |   |                |        | S          | O          |
| <i>Gaussia maya</i> (O.F.Cook) H.J.Quero & Read      | Arecaeae       | NL       | NL   | Acc  | Acc | Acc | Acc  | Acc | 1        |   |   |   | 1 |   |   |   |                |        | S          | O          |
| <i>Ginkgo biloba</i> L.                              | Ginkgoaceae    | NL       | NL   | Acc  | Acc | Acc | Acc  | Acc | 8        | 1 |   |   | 1 | 1 |   |   |                |        | S          | O          |
| <i>Gossypium hirsutum</i> L.                         | Malvaceae      | NL       | NL   | Acc  | Acc | Acc | Acc  | Acc | 65       |   | 1 |   |   | 1 |   |   |                |        | S          | O          |
| <i>Grevillea banksii</i> R.Br.                       | Proteaceae     | NL       | NL   | Acc  | Acc | Acc | Acc  | Acc | 3        |   |   |   | 1 |   |   |   |                |        | S          | O          |
| <i>Helichrysum italicum</i> (Roth) G.Don             | Asteraceae     | NL       | NL   | Acc  | Acc | Acc | Acc  | Acc | 1        |   |   |   |   | 1 |   |   |                |        | S          | O          |
| <i>Heliconia bihai</i> (L.) L.                       | Musaceae       | NL       | NL   | Acc  | Acc | Acc | Acc  | Acc | 11       |   |   |   | 1 |   |   |   |                |        | S          | O          |
| <i>Heliconia psittacorum</i> L.f.                    | Musaceae       | NL       | NL   | Acc  | Acc | Acc | Acc  | Acc | 17       |   |   |   |   | 1 |   |   |                |        | S          | O          |
| <i>Heptapleurum arboricola</i> Hayata                | Araliaceae     | NL       | NL   | Acc  | Syn | Syn | Syn  | Syn | 1        |   | 1 | 1 | 1 | 1 | 1 | 1 |                |        | S          | O          |
| <i>Howea belmoreana</i> (C.Moore & F.Muell.) Becc.   | Arecaeae       | NL       | NL   | Acc  | Acc | Acc | Acc  | Acc | 2        |   |   |   | 1 | 1 |   |   |                |        | S          | O          |
| <i>Howea forsteriana</i> (F.Muell.) Becc.            | Arecaeae       | NL       | NL   | Acc  | Acc | Acc | Acc  | Acc | 3        |   | 1 |   | 1 |   |   |   |                |        | S          | O          |
| <i>Hura crepitans</i> L.                             | Euphorbiaceae  | NL       | NL   | Acc  | Acc | Acc | Acc  | Acc | 8        |   | 1 |   |   | 1 |   |   |                |        | S          | O          |
| <i>Hymenocallis littoralis</i> (Jacq.) Salisb.       | Amaryllidaceae | NL       | NL   | Acc  | Acc | Acc | Acc  | Acc | 32       |   |   |   |   | 1 | 1 |   |                |        | S          | O          |
| <i>Hyophorbe lagenicaulis</i> (L.H.Bailey) H.E.Moore | Arecaeae       | NL       | NL   | Acc  | Acc | Acc | Acc  | Acc | 2        |   |   |   | 1 |   |   |   |                |        | S          | O          |
| <i>Hyophorbe verschaffeltii</i> H.Wendl.             | Arecaeae       | NL       | NL   | Acc  | Acc | Acc | Acc  | Acc | 2        |   |   |   | 1 | 1 |   |   |                |        | S          | O          |
| <i>Hyphaene coriacea</i> Gaertn.                     | Arecaeae       | NL       | NL   | Acc  | Acc | Acc | Acc  | Acc | 16       |   |   |   |   | 1 |   |   |                |        | S          | O          |
| <i>Ipomoea horsfalliae</i> Hook.                     | Convolvulaceae | NL       | NL   | Acc  | Acc | Acc | Acc  | Acc | 1        |   |   |   | 1 |   |   |   |                |        | S          | O          |
| <i>Iresine diffusa</i> Humb. & Bonpl. ex Willd.      | Amaranthaceae  | NL       | NL   | Acc  | Acc | Acc | Acc  | Acc | 49       |   |   |   | 1 |   |   |   |                |        | S          | O          |
| <i>Ixora coccinea</i> L.                             | Rubiaceae      | NL       | NL   | Acc  | NL  | Acc | Acc  | Acc | 2        |   |   |   |   | 1 |   |   |                |        | S          | O          |
| <i>Jasminum azoricum</i> L.                          | Oleaceae       | NL       | NL   | Acc  | Acc | Acc | Acc  | Acc | 2        |   |   |   |   | 1 |   |   |                |        | S          | O          |
| <i>Jasminum mesnyi</i> Hance                         | Oleaceae       | NL       | NL   | Acc  | Acc | Acc | Acc  | Acc | 1        |   |   |   | 1 |   |   |   |                |        | S          | O          |

| Species Name                                               | Family         | Atlantis | Muer | POWO | WFO | COL | GBIF | TRY | POWO Syn | H | P | G | T | C | F | L | Endemic Status | Native | Non native | Ornam Crop |
|------------------------------------------------------------|----------------|----------|------|------|-----|-----|------|-----|----------|---|---|---|---|---|---|---|----------------|--------|------------|------------|
| <i>Jasminum polyanthum</i> Franch.                         | Oleaceae       | NL       | NL   | Acc  | Acc | Acc | Acc  | Acc | 3        |   | 1 |   | 1 |   |   |   |                |        | S          | O          |
| <i>Jubaea chilensis</i> (Moll.) Baill.                     | Arecaceae      | NL       | NL   | Acc  | Acc | Acc | Acc  | Acc | 4        |   |   |   | 1 |   |   |   |                |        | S          | O          |
| <i>Justicia aurea</i> Schlechtend.                         | Acanthaceae    | NL       | NL   | Acc  | Acc | Acc | Acc  | Acc | 14       |   |   |   | 1 |   |   |   |                |        | S          | O          |
| <i>Justicia floribunda</i> (J.J.Veitch) Wassh.             | Acanthaceae    | NL       | NL   | Acc  | Acc | Acc | Acc  | Acc | 7        |   |   |   | 1 |   |   |   |                |        | S          | O          |
| <i>Kalanchoe beharensis</i> Drake                          | Crassulaceae   | NL       | NL   | Acc  | NL  | Acc | Acc  | Acc | 1        |   | 1 |   | 1 |   |   |   |                |        | S          | O          |
| <i>Kalanchoe marmorata</i> Baker                           | Crassulaceae   | NL       | NL   | Acc  | NL  | Acc | Acc  | Acc | 4        |   |   | 1 |   |   | 1 |   |                |        | S          | O          |
| <i>Kalanchoe x laetivirens</i> Desc.                       | Crassulaceae   | Syn      | NL   | Acc  | NL  | Acc | NL   | NL  | 1        |   |   |   |   |   |   |   |                |        | S          | O          |
| <i>Kigelia africana</i> (Lam.) Benth.                      | Bignoniaceae   | NL       | NL   | Acc  | Acc | Acc | Acc  | Acc | 2        |   | 1 |   |   | 1 |   | 1 |                |        | S          | O          |
| <i>Kroenleinia grusonii</i> (Hildm.) Lodé                  | Cactaceae      | NL       | NL   | Acc  | Syn | Syn | Syn  | Syn | 3        |   | 1 |   |   | 1 | 1 |   |                |        | S          | O          |
| <i>Lagunaria patersonia</i> (Andr.) G.Don.                 | Malvaceae      | NL       | NL   | Acc  | Acc | Acc | Acc  | Acc | 5        |   |   |   |   | 1 | 1 |   |                |        | S          | O          |
| <i>Latania loddigesii</i> Mart.                            | Arecaeae       | NL       | NL   | Acc  | Acc | Acc | Acc  | Acc | 1        |   |   |   | 1 | 1 |   |   |                |        | S          | O          |
| <i>Latania lontaroides</i> (Gaertn.) H.E.Moore             | Arecaeae       | NL       | NL   | Acc  | Acc | Acc | Acc  | Acc | 5        |   |   |   | 1 |   |   |   |                |        | S          | O          |
| <i>Latania verschaaffeltii</i> Lem.                        | Arecaeae       | NL       | NL   | Acc  | Acc | Acc | Acc  | Acc | 1        |   |   |   | 1 |   |   |   |                |        | S          | O          |
| <i>Laurus nobilis</i> L.                                   | Lauraceae      | NL       | NL   | Acc  | Acc | Acc | Acc  | Acc | 3        |   | 1 |   | 1 |   |   |   |                |        | S          | O          |
| <i>Leucospermum cordifolium</i> (Salisb. ex Knight) Fourc. | Proteaceae     | NL       | NL   | Acc  | Acc | Acc | Acc  | Acc | 8        |   |   | 1 |   |   |   |   |                |        | S          | O          |
| <i>Licuala spinosa</i> Wurmb.                              | Arecaeae       | NL       | NL   | Acc  | Acc | Acc | Acc  | Acc | 4        |   |   |   | 1 |   |   |   |                |        | S          | O          |
| <i>Livistona australis</i> (R.Br.) Mart.                   | Arecaeae       | NL       | NL   | Acc  | Acc | Acc | Acc  | Acc | 1        |   |   |   | 1 |   |   |   |                |        | S          | O          |
| <i>Livistona chinensis</i> (Jacq.) R.Br. ex Mart.          | Arecaceae      | NL       | NL   | Acc  | Acc | Acc | NL   | Acc | 7        |   | 1 |   | 1 | 1 |   |   |                |        | S          | O          |
| <i>Livistona decora</i> (W.Bull) Dowe                      | Arecaeae       | NL       | NL   | Acc  | Acc | Acc | Acc  | Acc | 3        |   |   |   | 1 |   |   |   |                |        | S          | O          |
| <i>Lonicera hildebrandtiana</i> Collett & Hemsl.           | Caprifoliaceae | NL       | NL   | Acc  | Acc | NL  | Acc  | NL  | 1        |   |   |   |   | 1 |   |   |                |        | S          | O          |
| <i>Lycianthes rantonnetii</i> (Carrière) Bitter            | Solanaceae     | NL       | NL   | Acc  | Acc | Acc | Acc  | Syn | 9        |   | 1 |   | 1 |   | 1 |   |                |        | S          | O          |
| <i>Lycianthes virgata</i> (Lam.) Bitter                    | Solanaceae     | Syn      | NL   | Acc  | Acc | Acc | Acc  | Acc | 7        |   |   |   | 1 |   |   |   |                |        | S          | O          |
| <i>Macadamia integrifolia</i> Maiden et Betcher.           | Proteaceae     | NL       | NL   | Acc  | Acc | Acc | Acc  | Acc | 1        |   | 1 |   | 1 |   |   |   |                |        | S          | C          |
| <i>Mackaya bella</i> Harv.                                 | Acanthaceae    | NL       | NL   | Acc  | Acc | Acc | Acc  | Acc | 1        |   |   |   | 1 |   |   |   |                |        | S          | O          |

| Species Name                                                              | Family         | Atlantis | Muer | POWO | WFO | COL | GBIF | TRY | POWO Syn | H | P | G | T | C | F | L | Endemic Status | Native | Non native | Ornam Crop |
|---------------------------------------------------------------------------|----------------|----------|------|------|-----|-----|------|-----|----------|---|---|---|---|---|---|---|----------------|--------|------------|------------|
| <i>Malephora lutea</i> Haw.) Schwantes                                    | Aizoaceae      | NL       | NL   | Acc  | Acc | Acc | Acc  | Acc | 2        |   |   |   |   | 1 |   |   |                |        | S          | O          |
| <i>Mammea americana</i> L.                                                | Calophyllaceae | NL       | NL   | Acc  | Acc | Acc | Acc  | Acc | 1        |   |   |   | 1 |   |   |   |                |        | S          | O          |
| <i>Mandevilla laxa</i> (Ruiz & Pav.) Woodson                              | Apocynaceae    | NL       | NL   | Acc  | Acc | Acc | Acc  | Acc | 10       |   |   |   | 1 |   |   |   |                |        | S          | O          |
| <i>Mansoa alliacea</i> (Lam.) A.H.Gentry                                  | Bignoniaceae   | NL       | NL   | Acc  | Acc | Acc | Acc  | Acc | 13       |   |   | 1 |   |   |   |   |                |        | S          | O          |
| <i>Melaleuca glauca</i> (DC.) Craven                                      | Myrtaceae      | NL       | NL   | Acc  | Acc | Acc | Acc  | Syn | 10       |   |   |   | 1 |   |   |   |                |        | S          | O          |
| <i>Melaleuca linearis</i> Schrad. & J.C.Wendl.                            | Myrtaceae      | NL       | NL   | Acc  | Syn | Syn | Syn  | Syn | 2        |   |   |   | 1 |   | 1 |   |                |        | S          | O          |
| <i>Melaleuca viminalis</i> (Sol. ex Gaertn.) Byrnes                       | Myrtaceae      | Syn      | Syn  | Acc  | Syn | Syn | Syn  | Syn |          |   |   |   | 1 | 1 |   |   |                |        | S          | O          |
| <i>Metrosideros collina</i> (J.R.Forst. & G.Forst.) A.Gray                | Myrtaceae      | NL       | NL   | Acc  | Acc | Acc | Acc  | Acc | 1        |   |   |   |   | 1 |   |   |                |        | S          | O          |
| <i>Metrosideros excelsa</i> Sol. ex Gaertn.                               | Myrtaceae      | NL       | NL   | Acc  | Acc | Acc | Acc  | Acc | 1        |   | 1 |   | 1 |   |   | 1 |                |        | S          | O          |
| <i>Monstera deliciosa</i> Liebm.                                          | Araceae        | NL       | NL   | Acc  | Acc | Acc | Acc  | Acc | 7        |   | 1 | 1 |   | 1 |   |   |                |        | S          | O          |
| <i>Montanoa hibiscifolia</i> Benth.                                       | Asteraceae     | NL       | NL   | Acc  | Acc | Acc | Acc  | Acc | 4        |   |   |   | 1 |   |   |   |                |        | S          | O          |
| <i>Musa rubra</i> Wall. ex Kurz                                           | Musaceae       | NL       | NL   | Acc  | Acc | Acc | Acc  | Acc | 1        |   |   |   | 1 |   |   |   |                |        | S          | O          |
| <i>Nandina domestica</i> Thunb.                                           | Berberidaceae  | NL       | NL   | Acc  | Acc | Acc | Acc  | Acc | 4        |   |   |   | 1 |   |   |   |                |        | S          | O          |
| <i>Ochna serrulata</i> (Hochst.) Walp.                                    | Ochnaceae      | NL       | NL   | Acc  | Acc | Acc | Acc  | Acc | 1        |   |   | 1 |   |   |   |   |                |        | S          | O          |
| <i>Odontonema callistachyum</i> (Schltdl. & Cham.) Kuntze                 | Acanthaceae    | NL       | NL   | Acc  | Acc | Syn | Acc  | Acc | 16       |   |   |   | 1 |   |   |   |                |        | S          | O          |
| <i>Odontonema tubaeforme</i> (Bertol.) Kuntze                             | Acanthaceae    | NL       | NL   | Acc  | Acc | Syn | Acc  | Acc | 12       |   |   |   |   | 1 |   |   |                |        | S          | O          |
| <i>Oenothera lindheimeri</i> (Engelm. & A.Gray) W.L.Wagner & Hoch         | Arecaeae       | NL       | NL   | Acc  | Syn | Acc | Acc  | Syn | 1        |   |   |   |   | 1 |   |   |                |        | S          | O          |
| <i>Oreopanax nymphaeifolius</i> (Hibberd) Decne. & Planch. ex G.Nicholson | Araliaceae     | NL       | NL   | Acc  | Acc | Acc | Acc  | Acc | 0        |   |   |   |   | 1 |   |   |                |        | S          | O          |
| <i>Pachocereus pringlei</i> (S.Watson) Britton & Rose                     | Cactaceae      | NL       | NL   | Acc  | Acc | Acc | Acc  | Acc | 10       |   |   |   |   | 1 |   |   |                |        | S          | O          |
| <i>Pachypodium lamerei</i> Drake                                          | Apocynaceae    | NL       | NL   | Acc  | Acc | Acc | Acc  | Acc | 2        |   |   |   |   | 1 |   |   |                |        | S          | O          |
| <i>Pandanus utilis</i> Bory                                               | Pandanaceae    | NL       | NL   | Acc  | Acc | Acc | Acc  | Acc | 16       |   | 1 |   | 1 | 1 |   |   |                |        | S          | O          |
| <i>Pandorea pandorana</i> (Andrews) Steenis                               | Bignoniaceae   | NL       | NL   | Acc  | Acc | Acc | Acc  | Acc | 3        |   |   |   | 1 |   |   |   |                |        | S          | O          |
| <i>Passiflora trifasciata</i> Lem.                                        | Passifloraceae | NL       | NL   | Acc  | Acc | Acc | Acc  | Acc | 0        |   |   |   | 1 |   |   |   |                |        | S          | O          |



| Species Name                                          | Family       | Atlantis | Muer | POWO | WFO | COL | GBIF | TRY | POWO Syn | H | P | G | T | C | F | L | Endemic Status | Native | Non native | Ornam Crop |
|-------------------------------------------------------|--------------|----------|------|------|-----|-----|------|-----|----------|---|---|---|---|---|---|---|----------------|--------|------------|------------|
| <i>Pavonia sepium</i> A.St.-Hil.                      | Malvaceae    | NL       | NL   | Acc  | Acc | Acc | Acc  | Acc | 13       |   |   |   | 1 |   |   |   |                |        | S          | O          |
| <i>Pavonia strictiflora</i> (Hook.) G.L.Esteves       | Malvaceae    | NL       | NL   | Acc  | Syn | Acc | Acc  | Acc | 1        |   |   |   | 1 |   |   |   |                |        | S          | O          |
| <i>Pelargonium crispum</i> (L.) L'Hér.                | Geraniaceae  | NL       | NL   | Acc  | Acc | Acc | Acc  | Acc | 9        |   | 1 |   |   | 1 |   |   |                |        | S          | O          |
| <i>Phoenix reclinata</i> Jacq.                        | Arecaceae    | NL       | NL   | Acc  | Acc | Acc | Acc  | Acc | 9        |   |   |   | 1 |   |   |   |                |        | S          | O          |
| <i>Phoenix roebelenii</i> O'Brien.                    | Arecaceae    | NL       | NL   | Acc  | Acc | Acc | Acc  | Acc | 0        |   |   |   |   | 1 |   |   |                |        | S          | O          |
| <i>Phoenix theophrasti</i> Greuter                    | Arecaceae    | NL       | NL   | Acc  | Acc | Acc | Acc  | Acc | 0        |   |   |   | 1 |   |   |   |                |        | S          | O          |
| <i>Phyllostachys aurea</i> Rivière & C.Rivière        | Poaceae      | NL       | NL   | Acc  | Acc | Acc | Acc  | Acc | 2        |   |   |   |   | 1 |   |   |                | S      |            | O          |
| <i>Phymosia umbellata</i> (Cav.) Kearney              | Malvaceae    | NL       | NL   | Acc  | Acc | Acc | Acc  | Acc | 4        |   |   |   | 1 |   |   |   |                |        | S          | O          |
| <i>Pithecellobium dulce</i> (Roxb.) Benth.            | Fabaceae     | NL       | NL   | Acc  | Acc | Acc | Acc  | Acc | 17       |   |   |   |   | 1 |   |   |                |        | S          | O          |
| <i>Platycladus orientalis</i> (L.) Franco             |              | NL       | NL   | Acc  | Acc | Acc | Acc  | Acc | 2        |   |   |   | 1 |   |   |   |                | S      |            | O          |
| <i>Podranea brycei</i> (N.E.Br.) Sprague              | Bignoniaceae | NL       | NL   | Acc  | Acc | Acc | Acc  | Acc | 2        |   |   |   | 1 |   |   |   |                |        | S          | O          |
| <i>Polygala myrtifolia</i> L.                         | Polygalaceae | NL       | NL   | Acc  | Acc | Acc | Acc  | Acc | 8        |   | 1 |   |   | 1 |   | 1 |                |        | S          | O          |
| <i>Polyscias guilfoylei</i> (W.Bull.) L.H.Bailey      | Araliaceae   | NL       | NL   | Acc  | Acc | Acc | Acc  | Acc | 8        |   |   |   | 1 |   |   |   |                |        | S          | O          |
| <i>Pritchardia hillebrandii</i> Becc.                 | Arecaeae     | NL       | NL   | Acc  | Acc | Acc | Acc  | Acc | 4        |   | 1 |   | 1 | 1 |   |   |                |        | S          | O          |
| <i>Pritchardia pacifica</i> Seem. & H.Wendl.          | Arecaeae     | NL       | NL   | Acc  | Acc | Acc | Acc  | Acc | 3        |   |   |   | 1 |   |   |   |                |        | S          | O          |
| <i>Pritchardia thurstonii</i> F.Muell. & Drude        | Arecaeae     | NL       | NL   | Acc  | Acc | Acc | Acc  | Acc | 3        |   |   |   | 1 |   |   |   |                |        | S          | O          |
| <i>Prunus laurocerasus</i> L.                         | Rosaceae     | NL       | NL   | Acc  | Acc | Acc | Acc  | Acc | 6        |   |   |   |   | 1 |   |   |                |        | S          | O          |
| <i>Pseuderanthemum maculatum</i> (G.Lodd.) I.M.Turner | Acanthaceae  | NL       | NL   | Acc  | Syn | Acc | Acc  | Syn | 30       |   |   |   |   | 1 |   |   |                |        | S          | O          |
| <i>Pseudobombax ellipticum</i> (Kunth) Dugand         | Malvaceae    | NL       | NL   | NL   | Acc | Acc | Acc  | Acc | 5        |   |   |   |   | 1 |   |   |                |        | S          | O          |
| <i>Psidium cattleianum</i> Sabine                     | Psilotaceae  | NL       | NL   | Acc  | Acc | Acc | Acc  | Acc | 25       |   | 1 |   |   |   |   |   |                |        | S          | O          |
| <i>Ptychosperma elegans</i> (R.Br.) Blume             | Arecaeae     | NL       | NL   | Acc  | Acc | Acc | Acc  | Acc | 12       |   |   |   | 1 | 1 |   |   |                |        | S          | O          |
| <i>Ravenea rivularis</i> Jum. & H.Perrier             | Arecaeae     | NL       | NL   | Acc  | Acc | Acc | Acc  | Acc | 0        |   |   |   | 1 |   |   |   |                |        | S          | O          |
| <i>Rhaphiolepis indica</i> (L.) Lindl.                | Rosaceae     | NL       | NL   | Acc  | Acc | Acc | Acc  | Acc | 50       |   |   |   | 1 | 1 |   |   |                |        | S          | O          |
| <i>Rhapis excelsa</i> (Thunb.) A.Henry                | Arecaceae    | NL       | NL   | Acc  | Acc | Acc | Acc  | Acc | 8        |   |   |   | 1 | 1 |   |   |                |        | S          | O          |

| Species Name                                               | Family         | Atlantis | Muer | POWO | WFO  | COL | GBIF | TRY | POWO Syn | H | P | G | T | C | F | L | Endemic Status | Native | Non native | Ornam Crop |
|------------------------------------------------------------|----------------|----------|------|------|------|-----|------|-----|----------|---|---|---|---|---|---|---|----------------|--------|------------|------------|
| <i>Rhapis humilis</i> Blume                                | Arecaceae      | NL       | NL   | Acc  | Acc  | Acc | Acc  | Acc | 5        |   |   |   | 1 |   |   |   |                |        | S          | O          |
| <i>Roystonea oleracea</i> (Jacq.) O.F.Cook                 | Arecaceae      | NL       | NL   | Acc  | Acc  | Acc | Acc  | Acc | 11       |   |   |   | 1 |   |   |   |                |        | S          | O          |
| <i>Roystonea regia</i> (Kunth.) O.F. Cook                  | Arecaceae      | NL       | NL   | Acc  | Acc  | Acc | Acc  | Acc | 10       |   |   |   | 1 | 1 |   |   |                |        | S          | O          |
| <i>Ruellia simplex</i> Wright                              | Acanthaceae    | NL       | NL   | Acc  | Acc  | Acc | Acc  | Acc | 9        |   |   |   |   | 1 |   |   |                |        | S          | O          |
| <i>Ruttya fruticosa</i> Lindau                             | Acanthaceae    | NL       | NL   | Acc  | Acc  | Acc | Acc  | Acc | 0        |   |   |   | 1 | 1 |   |   |                |        | S          | O          |
| <i>Sabal minor</i> (Jacq.) Pers.                           | Arecaceae      | NL       | NL   | Acc  | Acc  | Acc | Acc  | Acc | 20       |   |   |   | 1 |   |   |   |                |        | S          | O          |
| <i>Sanguisorba minor</i> Scop.                             | Rosaceae       | NL       | NL   | Acc  | Acc  | Syn | Acc  | Acc | 18       |   | 1 | 1 | 1 | 1 |   |   |                |        | S          |            |
| <i>Sapindus mukorossi</i> Gaertn.                          | Sapindaceae    | NL       | NL   | Acc  | Acc  | Acc | NL   | Acc | 8        |   |   |   |   | 1 |   |   |                |        | S          | O          |
| <i>Scadoxus puniceus</i> (L.) Friis & Nordal               | Amaryllidaceae | NL       | NL   | Acc  | Acc  | Acc | Acc  | Acc | 10       |   |   |   | 1 |   |   |   |                |        | S          | O          |
| <i>Scaevola humilis</i> R.Br.                              | Goodeniaceae   | NL       | NL   | Acc  | AmUn | Acc | Acc  | Acc | 2        |   |   |   |   | 1 |   |   |                |        | S          | O          |
| <i>Schotia latifolia</i> Jacq.                             | Fabaceae       | NL       | NL   | Acc  | Acc  | Acc | Acc  | Acc | 3        |   |   |   | 1 | 1 |   |   |                |        | S          | O          |
| <i>Sideritis candicans</i> Aiton                           | Lamiaceae      | NL       | NL   | Acc  | Acc  | Acc | Acc  | Acc | 5        |   |   |   | 1 |   |   |   |                |        | S          | O          |
| <i>Sideroxylon foetidissimum</i> Jacq.                     | Sapotaceae     | NL       | NL   | Acc  | Acc  | Acc | Acc  | Acc | 3        |   |   |   |   | 1 |   |   |                |        | S          | O          |
| <i>Solanum wendlandii</i> Hook f.                          | Solanaceae     | NL       | NL   | Acc  | Acc  | Acc | Acc  | Acc | 4        |   | 1 |   |   |   |   |   |                |        | S          | O          |
| <i>Sphaeropteris cooperi</i> (Hook. ex F.Muell.) R.M.Tryon | Cyatheaceae    | NL       | NL   | Acc  | Acc  | Acc | Acc  | Acc | 9        |   |   |   | 1 |   |   |   |                |        | S          | O          |
| <i>Stenocereus griseus</i> (Haw.) Buxb.                    | Cactaceae      | NL       | NL   | Acc  | Acc  | Acc | Acc  | Acc | 25       |   |   |   |   | 1 |   |   |                | S      |            | O          |
| <i>Stephanotis floribunda</i> Jacques                      | Apocynaceae    | NL       | NL   | Acc  | Syn  | Acc | Acc  | Syn | 1        |   |   | 1 |   |   |   |   |                |        | S          | O          |
| <i>Strelitzia alba</i> (L.f.) Skeels                       | Strelitziaceae | NL       | NL   | Acc  | Acc  | Acc | Acc  | Acc | 4        |   |   | 1 |   |   |   |   |                |        | S          | O          |
| <i>Strelitzia nicolai</i> Regel & Körn.                    | Strelitziaceae | NL       | NL   | Acc  | Acc  | Acc | Acc  | Acc | 1        |   | 1 |   | 1 | 1 | 1 |   |                |        | S          | O          |
| <i>Strelitzia reginae</i> Banks                            | Strelitziaceae | NL       | NL   | Acc  | Acc  | Acc | Acc  | Acc | 2        |   | 1 | 1 | 1 | 1 | 1 | 1 |                |        | S          | O          |
| <i>Syagrus romanzoffiana</i> (Cham.) Glassman              | Arecaceae      | NL       | NL   | Acc  | Acc  | Acc | Acc  | Acc | 19       |   |   |   | 1 | 1 |   |   |                |        | S          | O          |
| <i>Syagrus weddelliana</i> (H.Wendl.) Becc.                | Arecaceae      | NL       | NL   | Acc  | Syn  | Acc | Acc  | Syn | 11       |   |   |   |   |   |   |   |                |        | S          | O          |
| <i>Syngonium podophyllum</i> Schott                        | Araceae        | NL       | NL   | Acc  | Acc  | Acc | Acc  | Acc | 1        |   |   |   |   | 1 |   |   |                |        | S          | O          |
| <i>Syzygium malaccense</i> (L.) Merr. & L.M.Perry          | Myrtaceae      | NL       | NL   | Acc  | Acc  | Acc | Acc  | Acc | 16       |   |   |   |   | 1 |   |   |                |        | S          | O          |

| Species Name                                                                   | Family         | Atlantis | Muer | POWO | WFO  | COL | GBIF | TRY | POWO Syn | H | P | G | T | C | F | L | Endemic Status | Native | Non native | Ornam Crop |
|--------------------------------------------------------------------------------|----------------|----------|------|------|------|-----|------|-----|----------|---|---|---|---|---|---|---|----------------|--------|------------|------------|
| <i>Tabebuia heterophylla</i> (DC.) Britton                                     | Bignoniaceae   | NL       | NL   | Acc  | Acc  | Acc | Acc  | Acc | 25       |   |   |   |   | 1 |   |   |                |        | S          | O          |
| <i>Tamarindus indica</i> L.                                                    | Fabaceae       | NL       | NL   | Acc  | Acc  | Acc | Acc  | Acc | 6        |   |   |   | 1 |   |   |   |                |        | S          | O          |
| <i>Terminalia catappa</i> L.                                                   | Combretaceae   | NL       | NL   | Acc  | Acc  | Acc | Acc  | Acc | 16       |   |   |   |   | 1 |   |   |                |        | S          | O          |
| <i>Tetrapanax papyrifer</i> (Hook.) K.Koch                                     | Araliaceae     | NL       | NL   | Acc  | Acc  | Acc | Acc  | Acc | 6        |   |   |   | 1 |   |   |   |                |        | S          | O          |
| <i>Thaumatococcus bipinnatifidum</i> (Schott ex Endl.) Sakur., Calazans & Mayo | Araceae        | NL       | NL   | Acc  | Syn  | NL  | Acc  | Syn | 4        |   | 1 |   |   | 1 |   |   |                |        | S          | O          |
| <i>Thaumatococcus xanadu</i> (Croat, J.Boos & Mayo) Sakur., Calazans & Mayo    | Araceae        | NL       | NL   | Acc  | Syn  | NL  | Acc  | Syn | 1        |   |   |   |   | 1 |   |   |                |        | S          | O          |
| <i>Thespesia populneoides</i> (Roxb.) Kostel.                                  | Malvaceae      | NL       | NL   | Acc  | Acc  | Acc | Acc  | Acc | 3        |   |   |   |   | 1 |   |   |                |        | S          | O          |
| <i>Thrinax radiata</i> Lodd. ex Schult. & Schult.f.                            | Arecaceae      | NL       | NL   | Acc  | Acc  | Acc | Acc  | Acc | 14       |   |   |   | 1 |   |   |   |                |        | S          | O          |
| <i>Thunbergia coccinea</i> Wall. ex D.Don                                      | Acanthaceae    | NL       | NL   | Acc  | Acc  | Acc | Acc  | Acc | 6        |   |   |   | 1 |   |   |   |                |        | S          | O          |
| <i>Trachycarpus fortunei</i> (Hook.) H.Wendl.                                  | Arecaceae      | NL       | NL   | Acc  | Acc  | Acc | Acc  | Acc | 3        |   |   |   | 1 | 1 |   |   |                |        | S          | O          |
| <i>Triplaris brasiliensis</i> Mart. var. <i>acanthocoma</i> (Drude) Mattos     | Arecaceae      | NL       | NL   | Acc  | Syn  | Acc | Acc  | Acc | 1        |   |   |   | 1 | 1 |   |   |                |        | S          | O          |
| <i>Tulbaghia violacea</i> Harv.                                                | Amaryllidaceae | NL       | NL   | Acc  | Acc  | Acc | Acc  | Acc | 1        |   |   |   |   | 1 |   |   |                |        | S          | O          |
| <i>Vachellia karroo</i> (Hayne) Banfi & Galasso                                | Fabaceae       | NL       | NL   | Acc  | AmUn | Acc | Acc  | Acc | 8        |   |   |   |   | 1 |   |   |                |        | S          | O          |
| <i>Veronica x andersonii</i> Lindl. & Paxton                                   | Plantaginaceae | NL       | NL   | Acc  | Acc  | NL  | Acc  | Syn | 1        |   |   |   |   |   |   |   |                |        | S          | O          |
| <i>Verschaffeltia splendida</i> H.Wendl.                                       | Arecaceae      | NL       | NL   | Acc  | Acc  | Acc | Acc  | Acc | 3        |   |   |   | 1 | 1 |   |   |                |        | S          | O          |
| <i>Wallichia disticha</i> T.Anderson                                           | Arecaceae      | NL       | NL   | Acc  | Acc  | Acc | Acc  | Acc | 0        |   |   |   | 1 |   |   |   |                |        | S          | O          |
| <i>Washingtonia filifera</i> H. Wendl. ex de Bary                              | Arecaceae      | NL       | NL   | Acc  | Acc  | Acc | Acc  | Acc | 9        |   | 1 | 1 | 1 | 1 | 1 | 1 |                |        | S          | O          |
| <i>Washingtonia robusta</i> H.Wendl.                                           | Arecaceae      | Acc      | Acc  | Acc  | Acc  | Acc | Acc  | Acc | 9        |   | 1 |   | 1 | 1 | 1 | 1 |                |        | S          | O          |
| <i>Wodyetia bifurcata</i> A.K.Irvine                                           | Arecaceae      | NL       | NL   | Acc  | Acc  | Acc | Acc  | Acc | 0        |   |   |   | 1 |   |   |   |                |        | S          | O          |
| <i>Yucca aloifolia</i> L.                                                      | Asparagaceae   | Acc      | NL   | Acc  | Acc  | Acc | Acc  | Acc | 25       |   | 1 |   | 1 |   | 1 |   |                |        | S          | O          |
| <i>Yucca gloriosa</i> L.                                                       | Asparagaceae   | NL       | NL   | Acc  | Acc  | Acc | Acc  | Acc | 1        |   |   |   |   | 1 | 1 |   |                |        | S          | O          |
| <i>Zamia furfuracea</i> L.f. ex Aiton                                          | Zamiaceae      | NL       | NL   | Acc  | Acc  | Acc | Acc  | Acc | 4        |   |   |   |   | 1 |   |   |                |        | S          | O          |

## 5 Deleted Taxa

| Species Names                                                                                                 | Family         | Atlantis | Muer | POWO | WFO | COL  | GBIF | TRY | POWO Syn | Reason for Exclusion                            |
|---------------------------------------------------------------------------------------------------------------|----------------|----------|------|------|-----|------|------|-----|----------|-------------------------------------------------|
| <i>Adenocarpus foliolosus</i> (Aiton) DC. var. <i>villosus</i> Webb et Berth.                                 | Fabaceae       | NL       | Acc  | NL   | NL  | AmUn | Acc  | NL  |          | Not listed only in Muer and no publications     |
| <i>Agrostis stolonifera</i> L. subsp. <i>filifolia</i> (Link) H.Scholz                                        | Poaceae        | Acc      | Acc  | Syn  | NL  | Syn  | Syn  | Syn | 0        | Synonym                                         |
| <i>Aira caryophyllea</i> L. subsp. <i>multiculmis</i> (Dumort.) Hegi                                          | Poaceae        | NL       | Syn  | NL   | Syn | Syn  | Syn  | NL  |          | Synonym or not listed in all data sources       |
| <i>Allium triquetrum</i> L.                                                                                   | Amaryllidaceae | Acc      | NL   | Acc  | Acc | Acc  | Acc  | Acc | 4        | Erroneous record                                |
| <i>Asplenium ceterach</i> L.                                                                                  | Aspleniaceae   | Acc      | NL   | Acc  | Syn | Acc  | Acc  | Syn | 9        | Erroneous record                                |
| <i>Astragalus mareoticus</i> Delile subsp. <i>handiensis</i> (Bolte) G. Kunkel                                | Fabaceae       | NL       | Acc  | Syn  | Acc | Syn  | Syn  | Syn | 0        | Synonym                                         |
| <i>Avena barbata</i> Pott ex Link subsp. <i>lusitanica</i> (Tab.Morais) Romero Zarco                          | Poaceae        | Acc      | NL   | Syn  | Syn | Syn  | Syn  | Syn | 0        | Synonym                                         |
| <i>Avena fatua</i> L. subsp. <i>meridionalis</i> Malzev                                                       | Poaceae        | Acc      | Syn  | NL   | Syn | Syn  | Syn  | Syn |          | Synonym                                         |
| <i>Bromus commutatus</i> Schrad. subsp. <i>decipiens</i> (Bomble & H. Scholz) H. Scholz                       | Poaceae        | Acc      | NL   | Syn  | Acc | Acc  | Syn  | NL  | 4        | Synonym                                         |
| <i>Callistemon viminalis</i> (Sol. ex Gaertn.) G.Don                                                          | Myrtaceae      | Acc      | NL   | Syn  | Acc | Acc  | Acc  | Acc | 2        | Synonym                                         |
| <i>Carex muricata</i> L.                                                                                      | Cyperaceae     | Acc      | NL   | Acc  | Acc | Acc  | Acc  | Acc | 2        | Synonym                                         |
| <i>Cenchrus caudatus</i> (Schrad.) Kuntze                                                                     | Poaceae        | NL       | NL   | Acc  | Syn | Syn  | Syn  | Syn | 27       | Synonym or not listed in all sources except one |
| <i>Ceropegia dichotoma</i> Haw. subsp. <i>hians</i> Svent.                                                    | Asclepiadaceae | NL       | Acc  | NL   | Syn | Acc  | Acc  | NL  |          | Not listed in POWO and Atlantis                 |
| <i>Chamaecytisus prolifer</i> (L.f.) Link var. <i>canariae</i> (H.Christ) G. Kunkel                           | Fabaceae       | NL       | NL   | NL   | NL  | NL   | Syn  | Syn |          | Not listed or synonym                           |
| <i>Chamaecytisus prolifer</i> (L.f.) Link var. <i>hierrensis</i> (Pit.) Acebes                                | Fabaceae       | NL       | NL   | NL   | NL  | NL   | Syn  | Syn |          | Not listed or synonym                           |
| <i>Cistus ladanifer</i> L. subsp. <i>maculatus</i> Dunal ex DC.                                               | Cistaceae      | Acc      | NL   | NL   | Syn | Syn  | Syn  | NL  |          | Not listed or synonym in all sources except one |
| <i>Clinopodium menthifolium</i> (Host) Stace                                                                  | Lamiaceae      | NL       | NL   | Acc  | Acc | Acc  | Acc  | Acc | 2        | Not listed in any local database                |
| <i>Cystopteris diaphana</i> (Bory) Blasdel                                                                    | Athyriaceae    | Acc      | NL   | Syn  | Syn | Acc  | Acc  | NL  |          | Synonym                                         |
| <i>Cystopteris diaphana</i> (Bory) Blasdel subsp. <i>cleoae</i> (A. Peroni & G. Peroni) A. Peroni & G. Peroni | Athyriaceae    | Acc      | NL   | NL   | NL  | Acc  | Acc  | NL  |          | Synonym                                         |

| Species Names                                                                                | Family          | Atlantis | Muer | POWO | WFO  | COL  | GBIF | TRY | POWO Syn | Reason for Exclusion                            |
|----------------------------------------------------------------------------------------------|-----------------|----------|------|------|------|------|------|-----|----------|-------------------------------------------------|
| <i>Cystopteris fragilis</i> (L.) Bernh. subsp. <i>canariensis</i> Christ                     | Athyriaceae     | NL       | NL   | NL   | Acc  | AmUn | Acc  | NL  |          | Not listed in local databases and POWO          |
| <i>Ecballium elaterium</i> (L.) A.Rich. subsp. <i>dioicum</i> (Batt.) Costich                | Cucurbitaceae   | NL       | Acc  | Acc  | AmUn | Acc  | Acc  | Syn | 0        | Synonym                                         |
| <i>Echinochloa crus-galli</i> (L.) P.Beauv. subsp. <i>spiralis</i> (Vasinger) Tzvelev        | Poaceae         | Acc      | NL   | NL   | Syn  | Syn  | Syn  | NL  |          | Not listed or synonym in all sources except one |
| <i>Echium x bondspraguei</i> Sprague & Hutch.                                                | Boraginaceae    | NL       | Syn  | AmUn | AmUn | AmUn | Acc  | NL  | 0        | Not accepted in any source except gbif          |
| <i>Eragrostis barrelieri</i> Daveau subsp. <i>pygmea</i> (Daveau) Portal & Scholz            | Poaceae         | Acc      | Acc  | NL   | Syn  | AmUn | Syn  | NL  |          | Synonym                                         |
| <i>Euphorbia lamarckii</i> Sweet subsp. <i>broussonetii</i> (Willd. ex Link) Molero & Rovira | Euphorbiaceae   | Syn      | Acc  | NL   | NL   | AmUn | Acc  | NL  |          | Not listed or synonym in most sources           |
| <i>Euphorbia lambii</i> Svent.                                                               | Euphorbiaceae   | NL       | Syn  | NL   | NL   | AmUn | Syn  | Acc |          | Not listed or synonym in all sources            |
| <i>Euphorbia peplus</i> L. subsp. <i>minima</i> DC.                                          | Euphorbiaceae   | NL       | NL   | NL   | Acc  | Acc  | Acc  | Syn |          | Not listed in local databases and POWO          |
| <i>Foeniculum vulgare</i> Mill. var. <i>piperitum</i> (C.Presl) Ball                         | Apiaceae        | Acc      | Syn  | NL   | Syn  | Syn  | Syn  | NL  |          | Synonym                                         |
| <i>Furcraea tuberosa</i> (Mill.) Aiton                                                       | Asparagaceae    | Syn      | NL   | Acc  | Acc  | Acc  | Acc  | Acc | 9        | Synonym                                         |
| <i>Geranium palustre</i> L.                                                                  | Geraniaceae     | Syn      | Syn  | Acc  | Acc  | Acc  | Acc  | Acc | 3        | Erroneous record                                |
| <i>Herniaria hartungii</i> Parl.                                                             | Caryophyllaceae | Acc      | NL   | Syn  | AmUn | Syn  | Syn  | Syn | 0        | Not accpeted in sources except one              |
| <i>Holcus mollis</i> L.                                                                      | Poaceae         | NL       | NL   | Acc  | Acc  | Acc  | Acc  | Acc | 10       | Erroneous record                                |
| <i>Hyparrhenia rufa</i> (Nees) Stapf subsp. <i>altissima</i> (Stapf) B. K. Simon             | Poaceae         | Acc      | NL   | Syn  | Syn  | Syn  | Syn  | NL  |          | Not accepted in sources except one              |
| <i>Hyparrhenia sinaica</i> (Delile) G.Lopez                                                  | Poaceae         | Acc      | Acc  | Syn  | Syn  | Syn  | Syn  | Syn |          | Only accepted in local databases                |
| <i>Juniperus turbinata</i> Guss                                                              | Cupressaceae    | Acc      | Syn  | Acc  | Syn  | Syn  | Syn  | Syn | 8        | Synonyme in most datasources                    |
| <i>Lathyrus articulatus</i> L.                                                               | Fabaceae        | NL       | Acc  | Acc  | Syn  | Syn  | Syn  | Acc | 8        | Not accepted in most databases                  |
| <i>Lolium lowei</i> Menezes                                                                  | Poaceae         | Acc      | NL   | Syn  | Syn  | Syn  | Syn  | Syn |          | Not accepted in sources except one              |
| <i>Lolium parabolicae</i> Sennen                                                             | Poaceae         | Acc      | Acc  | Syn  | Syn  | Syn  | Syn  | Syn |          | Synonym                                         |
| <i>Lycium shawii</i> Roem. & Schult.                                                         | Solanaceae      | Syn      | Syn  | Acc  | Acc  | Acc  | Acc  | Acc | 16       | Synonym                                         |
| <i>Malva acerifolia</i> (Cav.) Alef. var. <i>hariensis</i> Svent.                            | Malvaceae       | NL       | Syn  | NL   | NL   | NL   | Acc  | Syn |          | Synonym                                         |

| Species Names                                                                                 | Family       | Atlantis | Muer | POWO | WFO | COL  | GBIF | TRY | POWO Syn | Reason for Exclusion                                 |
|-----------------------------------------------------------------------------------------------|--------------|----------|------|------|-----|------|------|-----|----------|------------------------------------------------------|
| <i>Malva pseudolavatera</i> Webb & Berthel.                                                   | Malvaceae    | NL       | Acc  | Syn  | Acc | Syn  | Syn  | Syn |          | Synonym                                              |
| <i>Matthiola fruticulosa</i> (L.) Maire                                                       | Brassicaceae | Syn      | NL   | Acc  | Acc | Acc  | Acc  | Acc | 22       | Synonym                                              |
| <i>Matthiola fruticulosa</i> (L.) Maire subsp. <i>fruticulosa</i>                             | Brassicaceae | Syn      | NL   | NL   | Syn | Acc  | Acc  | NL  |          | Synonym                                              |
| <i>Matthiola fruticulosa</i> (L.) Maire subsp. <i>bolleana</i>                                | Brassicaceae | Syn      | Syn  | NL   | NL  | Syn  | Syn  | NL  |          | Synonym                                              |
| <i>Matthiola fruticulosa</i> (L.) Maire subsp. <i>morocera</i>                                | Brassicaceae | Syn      | Syn  | NL   | NL  | AmUn | Acc  | NL  |          | Synonym                                              |
| <i>Medicago italica</i> (Mill.) Fiori                                                         | Fabaceae     | NL       | Acc  | Syn  | Acc | Syn  | Acc  | Syn |          | Synonym                                              |
| <i>Melica minuta</i> L. subsp. <i>latifolia</i> L. (Coss.) W.Hempel                           | Poaceae      | NL       | NL   | Syn  | Acc | Syn  | Syn  | NL  | 0        | Synonym                                              |
| <i>Micromeria helianthemifolia</i> P.Pérez & Kunkel var. <i>helianthemifolia</i>              | Lamiaceae    | NL       | NL   | NL   | NL  | AmUn | Syn  | NL  |          | Synonym                                              |
| <i>Micromeria helianthemifolia</i> P.Pérez & Kunkel var. <i>mary-annae</i> P.Pérez & G.Kunkel | Lamiaceae    | NL       | NL   | Syn  | Acc | Syn  | Syn  | NL  | 0        | Synonym                                              |
| <i>Micromeria hyssopifolia</i> Webb & Berthel.                                                | Lamiaceae    | Acc      | Acc  | Syn  | Acc | Acc  | Acc  | Acc | 0        | Synonym                                              |
| <i>Micromeria hyssopifolia</i> Webb & Berthel. var. <i>hyssopifolia</i>                       | Lamiaceae    | NL       | NL   | NL   | Syn | Acc  | Acc  | NL  |          | Not listed in local databases and POWO               |
| <i>Micromeria hyssopifolia</i> Webb & Berthel. var. <i>glabrescens</i>                        | Lamiaceae    | NL       | NL   | AmUn | Acc | Acc  | Acc  | NL  | 1        | Synonym                                              |
| <i>Micromeria hyssopifolia</i> Webb & Berthel. var. <i>kuegleri</i>                           | Lamiaceae    | NL       | NL   | AmUn | Acc | Acc  | Acc  | Acc | 2        | Not listed in local databases and unresolved in POWO |
| <i>Micromeria lasiophylla</i> Webb & Berthel. subsp. <i>palmensis</i> (Bolle) P.Pérez         | Lamiaceae    | NL       | NL   | Syn  | Acc | Syn  | Syn  | NL  | 0        | Synonym                                              |
| <i>Micromeria maderensis</i> Puppo & Bräuchler                                                | Lamiaceae    | NL       | NL   | Acc  | NL  | Syn  | Syn  | NL  | 0        | Synonym                                              |
| <i>Micromeria teneriffae</i> P.Pérez var. <i>cordifolia</i> P.Pérez                           | Lamiaceae    | NL       | NL   | Syn  | Acc | Syn  | Syn  | NL  | 0        | Synonym                                              |
| <i>Micromeria varia</i> Benth.                                                                | Lamiaceae    | NL       | Acc  | Syn  | Acc | Syn  | Acc  | Acc |          | Synonym                                              |
| <i>Micromeria varia</i> Benth. subsp. <i>varia</i> P.Pérez                                    | Lamiaceae    | Acc      | NL   | NL   | NL  | Syn  | Syn  | NL  |          | Synonym                                              |
| <i>Micromeria varia</i> Benth. subsp. <i>canariensis</i> P.Pérez                              | Lamiaceae    | NL       | Syn  | Syn  | Acc | Syn  | Syn  | NL  |          | Synonym                                              |
| <i>Micromeria varia</i> Benth. subsp. <i>gomerensis</i> P.Pérez                               | Lamiaceae    | NL       | Syn  | Syn  | Acc | Syn  | Syn  | NL  |          | Synonym                                              |
| <i>Micromeria varia</i> Benth. subsp. <i>hierrensis</i> P.Pérez                               | Lamiaceae    | NL       | NL   | Syn  | Acc | Syn  | Syn  | NL  |          | Synonym                                              |

| Species Names                                                                                                                           | Family          | Atlantis | Muer | POWO | WFO  | COL  | GBIF | TRY | POWO Syn | Reason for Exclusion |
|-----------------------------------------------------------------------------------------------------------------------------------------|-----------------|----------|------|------|------|------|------|-----|----------|----------------------|
| <i>Micromeria varia</i> Benth. subsp. <i>meridialis</i> P.Pérez                                                                         | Lamiaceae       | NL       | Syn  | Syn  | Acc  | Syn  | Syn  | NL  |          | Synonym              |
| <i>Micromeria varia</i> Benth. subsp. <i>rupestris</i> (Webb & Berthel) P. Pérez                                                        | Lamiaceae       | NL       | Syn  | Syn  | Acc  | Syn  | Syn  | NL  |          | Synonym              |
| <i>Micromeria varia</i> Benth. subsp. <i>thymoides</i> (Sol. ex Lowe) P.Pérez                                                           | Lamiaceae       | NL       | NL   | Syn  | Acc  | Syn  | Syn  | NL  |          | Synonym              |
| <i>Monanthes niphophila</i> Svent.                                                                                                      | Crassulaceae    | NL       | NL   | Acc  | Syn  | Syn  | Syn  | Syn | 1        | Synonym              |
| <i>Monanthes praegei</i> Bramwell                                                                                                       | Crassulaceae    | NL       | NL   | Acc  | Syn  | Syn  | Syn  | Syn | 1        | Synonym              |
| <i>Monanthes silensis</i> (Praeger) Svent.                                                                                              | Crassulaceae    | NL       | NL   | Acc  | Syn  | Syn  | Syn  | Syn | 0        | Synonym              |
| <i>Ononis natrix</i> Lam.                                                                                                               | Fabaceae        | NL       | NL   | Acc  | Acc  | Acc  | Acc  | Acc | 1        | Erroneous record     |
| <i>Ononis natrix</i> Lam. subsp. <i>angustissima</i> (Lam.) Siri.                                                                       | Fabaceae        | Syn      | NL   | Syn  | AmUn | Acc  | Acc  | Syn |          | Synonym              |
| <i>Ononis natrix</i> Lam. subsp. <i>hesperia</i> Maire                                                                                  | Fabaceae        | Syn      | Syn  | Acc  | Syn  | Acc  | Acc  | NL  | 1        | Synonym              |
| <i>Orobanche lavandulacea</i> (Rchb.) Pomel subsp. <i>trichocalyx</i> (Webb) Carlón, G. Gómez, Lainz, Moreno Mor., Ó. Sánchez & Schneew | Orobanchaceae   | Syn      | NL   | NL   | AmUn | AmUn | Acc  | NL  |          | Synonym              |
| <i>Panicum miliaceum</i> L. subsp. <i>agricola</i> H. Scholz & Mikolás                                                                  | Poaceae         | Acc      | Acc  | NL   | Syn  | AmUn | Syn  | NL  |          | Synonym              |
| <i>Papaver hybridum</i> L.                                                                                                              | Papaveraceae    | Acc      | Syn  | Acc  | Acc  | Acc  | Acc  | Acc | 6        | Synonym              |
| <i>Paspalidium geminatum</i> (Forssk.), Stapf in D. Oliver & auct.                                                                      | Poaceae         | Acc      | NL   | Syn  | Acc  | Syn  | NL   | Acc |          | Synonym              |
| <i>Patellifolia patellaris</i> (Moq.) A.J.Scott, Ford-Lloyd & J.T.Williams                                                              | Amaranthaceae   | Acc      | Acc  | Syn  | Syn  | Syn  | Syn  | Syn |          | Synonym              |
| <i>Patellifolia webbiana</i> (Moq.) A.J.Scott, Ford-Lloyd & J.T.Williams                                                                | Amaranthaceae   | Acc      | Acc  | Syn  | Syn  | Syn  | Syn  | Syn |          | Synonym              |
| <i>Pimpinella rupicola</i> Svent.                                                                                                       | Apiaceae        | Acc      | Acc  | Syn  | AmUn | Acc  | Acc  | NL  |          | Synonym              |
| <i>Pulicaria arabica</i> (L.) Cass. subsp. <i>hispanica</i> (Boiss.) Murb.                                                              | Asteraceae      | Acc      | Syn  | NL   | Acc  | Syn  | Acc  | Acc |          | Synonym              |
| <i>Quercus faginea</i> Lam.                                                                                                             | Fagaceae        | NL       | NL   | Acc  | Acc  | Acc  | Acc  | Acc | 0        | Erroneous record     |
| <i>Rhodalsine platyphylla</i> (J.Gay ex Christ) McNeil                                                                                  | Caryophyllaceae | NL       | Syn  | Syn  | AmUn | Syn  | Syn  | NL  |          | Synonym              |
| <i>Rhodalsine webbii</i> McNeill & Bramwell                                                                                             | Caryophyllaceae | NL       | Syn  | Syn  | AmUn | NL   | Acc  | NL  |          | Synonym              |

| Species Names                                                                       | Family          | Atlantis | Muer | POWO | WFO  | COL  | GBIF | TRY | POWO Syn | Reason for Exclusion     |
|-------------------------------------------------------------------------------------|-----------------|----------|------|------|------|------|------|-----|----------|--------------------------|
| <i>Rubia agostinhoi</i> Dans. & P.Silva                                             | Rubiaceae       | NL       | Syn  | Acc  | Acc  | Acc  | Acc  | Acc | 1        | Synonym                  |
| <i>Rubia peregrina</i> L. subsp. <i>longifolia</i> (Poir.) O. Bolós                 | Rubiaceae       | Acc      | Acc  | NL   | Syn  | Syn  | Syn  | NL  |          | Synonym                  |
| <i>Rumex acetosella</i> L. subsp. <i>pyrenaicus</i> (Pourr. Ex Lapeyr.) Akeroyd     | Polygonaceae    | NL       | Syn  | Acc  | Acc  | AmUn | Syn  | Acc | 5        | Erroneous record         |
| <i>Sambucus nigra</i> L.                                                            | Adoxaceae       | Acc      | NL   | Acc  | Acc  | Acc  | Acc  | Acc | 24       | Erroneous record         |
| <i>Scleranthus polycarpus</i> L.                                                    | Caryophyllaceae | Syn      | Acc  | Syn  | Syn  | Acc  | Acc  | Syn |          | Listed under its synonym |
| <i>Sideritis oroteneriffae</i> Négrin & P.Pérez var. <i>arayaë</i> Négrin & P.Pérez | Lamiaceae       | NL       | Acc  | Syn  | NL   | Syn  | Syn  | NL  |          | Synonym                  |
| <i>Silene latifolia</i> Poir.                                                       | Caryophyllaceae | Syn      | Syn  | Acc  | Acc  | Acc  | Acc  | Acc | 14       | Synonym                  |
| <i>Silene vulgaris</i> (Moench) Garcke subsp. <i>angustifolia</i> Hayek             | Caryophyllaceae | Acc      | NL   | NL   | Acc  | Syn  | Syn  | Acc |          | Synonym                  |
| <i>Solanum villosum</i> Mill. subsp. <i>miniaturum</i> (Bernh. ex Willd.) Edmonds   | Solanaceae      | Acc      | NL   | Syn  | Syn  | Acc  | Acc  | Acc | 0        | Synonym                  |
| <i>Spergularia fimbriata</i> Boiss. & Reut. var. <i>interclusa</i> Svent.           | Caryophyllaceae | NL       | Acc  | NL   | NL   | Acc  | Acc  | NL  |          | Synonym                  |
| <i>Taraxacum campylodes</i> G.E.Haglund                                             | Asteraceae      | Syn      | NL   | Acc  | Acc  | Acc  | Acc  | Acc | 0        | Synonym                  |
| <i>Torilis arvensis</i> (Huds.) Link subsp. <i>arvensis</i>                         | Apiaceae        | Acc      | Acc  | NL   | NL   | Acc  | Acc  | Acc |          | Erroneous record         |
| <i>Torilis pseudonodosa</i> Bianca                                                  | Apiaceae        | Acc      | Acc  | NL   | NL   | Acc  | Acc  | Acc |          | Synonym                  |
| <i>Trifolium oxaloides</i> Bunge ex Nyman                                           | Fabaceae        | Syn      | NL   | NL   | AmUn | AmUn | Syn  | Syn |          | Synonym                  |
| <i>Tritium aestivum</i> L. subsp. <i>hadropyrum</i> (Flaksb.) Tzvelev               | Poaceae         | Acc      | Acc  | NL   | Syn  | AmUn | Syn  | NL  |          | Synonym                  |
| <i>Viola kitaibeliana</i> Schult. var. <i>brevicalcarata</i> Font Quer & Svent      | Violaceae       | NL       | Acc  | NL   | NL   | Syn  | NL   | Acc |          | Synonym                  |



## 6 Synonyms

Official name followed by common synonyms

*Abutilon grandifolium* (Willd.) Sweet  
 - *Abutilon grandiflorum* [Deviating spelling]  
*Acalypha brachystachya* Hornem.  
 - *Acalypha supera* Forssk.  
*Achillea maritima* (L.) Ehrend. & Y.P.Guo  
 - *Otanthus maritimus* subsp. *maritimus*  
*Achyranthes aspera* L. var. *sicula* L.  
 - *Achyranthes sicula* (L.) All.  
*Acoelorrhapha wrightii* (Griseb. & H.Wendl.)  
 H.Wendl. ex Becc.  
 - *Acoelorrhapha wrightii* (Griseb. & H.Wendl.)  
 H.Wendl. ex Becc. [Deviating spelling]  
*Actinidia chinensis* Planch. var. *deliciosa* (A.Chev.)  
 A.Chev.  
 - *Actinidia chinensis* var. *hispida* C.F. Liang  
 - *Actinidia deliciosa* (A.Chev.) C.F.Liang &  
 A.R.Ferguson  
*Adenocarpus viscosus* (Willd.) Webb & Berthel.  
 subsp. *spartioides* (Webb & Berthel.) Rivas  
 Mart. & Belmonte  
 - *Adenocarpus viscosus* (Willd.) Webb &  
 Berthel.  
*Aegilops biuncialis* Vis.  
 - *Aegilops lorentii* Hochst.  
*Aeonium arboreum* Webb & Berthel. subsp.  
*arboreum*  
 - *Aonium arboreum* Webb & Berthel.  
*Aeonium canariense* (L.) Webb & Berthel. subsp.  
*latifolium* (Burchard) Bañares  
 - *Aeonium canariense* var. *subplanum* (Praeger)  
 H.Y.Liu  
*Aeonium dodrantale* (Willd.) T.H.M.Mes  
 - *Aeonium dodrantale* (Willd.) T.Mes  
 - *Greenovia dodrantalis* (Willd.) Webb ex  
 Berthel.  
*Aeonium palmense* Webb ex Christ  
 - *Aeonium canariense* subsp. *christii* (Webb ex  
 Christ) H.Y.Liu  
 - *Aeonium canariense* (L.) Webb & Berthel.  
 subsp. *palmense* (Webb ex Christ) H.Y.Liu  
*Aeonium pseudourbicum* Bañares  
 - *Aeonium urbicum* (C.Sm. ex Hornem.) Webb &  
 Berthel.  
*Aeonium rubrolineatum* Svent.  
 - *Aeonium arboreum* Webb & Berthel. var.  
*rubrolineatum* (Svent.) H.Y.Liu  
*Aeonium tabuliforme* (Haw.) Webb & Berthel.  
 - *Aeonium tabulaeforme*  
*Aeonium urbicum* (C.Sm. ex Hornem.) Webb &  
 Berthel. subsp. *meridionale* (Bañares) Bañares

- *Aeonium urbicum* (C.Sm. ex Hornem.) Webb &  
 Berthel.  
*Aeonium virgineum* Webb ex Christ  
 - *Aeonium canariense* subsp. *virgineum* (Webb  
 ex Christ) Bañares  
 - *Aeonium canariense* var. *virgineum* (Webb ex  
 Christ) H.Y.Liu  
*Agave americana* L. var. *franzosini* Sprenger  
 - *Agave beaulueriana* Jacobi  
 - *Agave franzosini* Baker  
 - *Agave franzosinii* (Sprenger) P.Sewell  
*Agave salmiana* Otto ex Salm-Dyck var. *ferox*  
 (K.Koch) Gentry  
 - *Agave ferox* K.Koch  
*Agave tequilana* F.A.C.Weber  
 - *Agave aff. tequilana* F.A.C.Weber  
*Agrostis pourretii* Willd.  
 - *Neoschischkinia pourretii* (Willd.) Valdés & H.  
 Scholz  
*Agrostis stolonifera* L. subsp. *filifolia* (Link)  
 H.Scholz  
 - *Agrostis stolonifera* L.  
*Agrostis stolonifera* L. subsp. *stolonifera*  
 - *Agrostis stolonifera* L.  
*Aichryson dichotomum* (DC.) Webb & Berthel.  
 - *Aichryson laxum* (Haw.) Bramwell  
*Aichryson laxum* (Haw.) Bramwell subsp.  
*latipetalum* (Bañares & M.A. Marrero) Bañares  
 - *Aichryson laxum* (Haw.) Bramwell  
*Aichryson pachycaulon* Bolle subsp.  
*gonzalezhernandezii* (G.Kunkel) Bramwell  
 - *Aichryson pachycaulon* gonzalez-hernandezii  
 (G. Kunkel) Bramwell  
*Aichryson tortuosum* (Aiton) Webb & Berthel.  
 subsp. *bethencourtianum* (Bolle) Bañares  
 - *Aichryson bethencourtianum* Bolle  
 - *Aichryson tortuosum* (Aiton) Webb & Berthel.  
 var. *bethencourtianum* (Bolle) Bañares & S.  
 Scholz  
*Aichryson tortuosum* (Aiton) Webb & Berthel. var.  
*tortuosum*  
 - *Aichryson tortuosum* (Aiton) Webb & Berthel.  
 subsp. *tortuosum*  
*Aira caryophyllea* L. subsp. *caryophyllea*  
 - *Aira caryophyllea* L.  
*Aira caryophyllea* L. subsp. *multiculmis* (Dumort.)  
 Hegi  
 - *Aira multiculmis* Dum.

*Aira caryophyllea* L. subsp. *plesiantha* Jord. ex Boreau  
 - *Aira multiculmis* Dum.  
*Aira elegans* Willd. ex Roem. & Schult.  
 - *Aira elegantissima* Schur.  
*Aizoanthemopsis hispanica* (L.) Klak  
 - *Aizoanthemum hispanicum* (L.) H.E.K.Hartmann  
 - *Aizoon hispanicum* L.  
*Ajuga iva* (L.) Schreb.  
 - *Ajuga pseudoiva* Robill. & Castagne ex DC.  
*Alchemilla microcarpa* Boiss. & Reut.  
 - *Alchemilla inexpectata* Boiss. & Reut.  
 - *Aphanes australis* Rydb.  
 - *Aphanes microcarpa* (Boiss. & Reut.) Rothm.  
*Allagopappus canariensis* (Willd.) Greuter  
 - *Allagopappus dichotomus* Cass.  
*Allamanda schottii* Pohl  
 - *Allamanda neriifolia* Hook.  
*Allium canariense* (Regel) N.Friesen & P. Schönfelder subsp. *obtusitpetalum* (Svent.) N.Friesen & P.Schönfelder  
 - *Allium subhirsutum* L. subsp. *obtusitpetalum* (Svent.) G. Kunkel  
*Allium neapolitanum* Cirillo  
 - *Allium subhirsutum* L.  
*Allium paniculatum* L. subsp. *pallens* (L.) K.Richt.  
 - *Allium pallens* L.  
*Allium sphaerocephalon* L.  
 - *Allium sphaerocephalum* L. non *sphaerocephalon*  
*Allium vineale* L.  
 - *Allium sphaerocephalum* Crome ex Schldt.  
*Aloe maculata* All.  
 - *Aloe maculata* Forssk.  
*Aloe vera* (L.) Burm.f.  
 - *Aloe maculata* Forssk.  
*Aloiampelos ciliaris* (Haw.) Klopper & Gideon F.Sm.  
 - *Aloe ciliaris* Haw.  
*Alstroemeria pelegrina* L.  
 - *Alstroemeria pulchella* L.f.  
*Alyssum simplex* Rudolph  
 - *Alyssum minus* Rothm.  
*Amaranthus blitum* L. subsp. *blitum*  
 - *Amaranthus blitum* L.  
*Amaranthus blitum* L. subsp. *emarginatus* (Salzm. ex Uline & Bray) Carretero, Muñoz Garm. & Pedrol  
 - *Amaranthus blitum* subsp. *polygonioides* (Zoll. ex Moq.) Carretero  
 - *Amaranthus emarginatus* Salzm. ex Uline & Bray  
*Amaranthus blitum* L.  
 - *Amaranthus lividus* L.

*Amaranthus graecizans* L. subsp. *silvestris* (Vill.) Brenan  
 - *Amaranthus graecizans* L.  
*Amaranthus hybridus* L. subsp. *hybridus*  
 - *Amaranthus hybridus* L.  
*Ammi procerum* Lowe  
 - *Ammi majus* L. subsp. *procerum* (Lowe) Menezes  
*Ammodaucus leucotrichus* Coss. subsp. *nanocarpus* Beltrán-Tej.  
 - *Ammodaucus nanocarpus* (Beltrán) P. Pérez & Velasco  
*Amphilophium buccinatorium* (DC.) L.G.Lohmann  
 - *Distictis buccinatoria* (DC.) A.H.Gentry  
*Amphilophium crucigerum* (L.) L.G.Lohmann  
 - *Pithecoctenium echinatum* (Jacq.) Baill.  
*Anacyclus radiatus* Loisel. subsp. *radiatus*  
 - *Anacyclus radiatus* Loisel.  
*Andryala pinnatifida* Aiton subsp. *pinnatifida*  
 - *Andryala pinnatifida* Aiton  
*Andryala pinnatifida* Aiton subsp. *webbii* (Sch.Bip. ex Christ) G. Kunkel  
 - *Andryala webbii* Sch. Bip. ex Webb & Bertel  
*Andryala rothia* Pers.  
 - *Andryala laxiflora* DC  
*Andryala webbii* Christ  
 - *Andryala pinnatifida* Aiton subsp. *webbii* (Sch.Bip. ex Christ) G.Kunkel  
*Anthoxanthum aristatum* Boiss.  
 - *Anthoxanthum puelii* Lecoq & Lamotte  
*Apium nodiflorum* (L.) Lag.  
 - *Heliosciodium nodiflorum* (L.) W. D. J. Koch  
 - *Helosciadium nodiflorum* (L.) W. D. J. Koch  
*Apium repens* (Jacq.) Lag.  
 - *Helosciadium repens* (Jacq.) W. D. J. Koch  
*Apteranthes burchardii* (N.E.Br.) Plowes subsp. *burchardii*  
 - *Caralluma burchardii* N.E.Br. subsp. *burchardii*  
*Apteranthes burchardii* (N.E.Br.) Plowes  
 - *Caralluma burchardii* N.E.Br.  
*Arabis caucasica* Willd.  
 - *Arabis alpina* L. subsp. *caucasica* (Willd.) Briq.  
*Arabis nova* Vill.  
 - *Arabis auriculata* Lam.  
*Arabis recta* Vill.  
 - *Arabis auriculata* Lam.  
*Arenaria serpyllifolia* L. subsp. *leptoclados* (Rchb.) Nyman  
 - *Arenaria leptoclados* (Rchb.) Guss.  
*Argyranthemum adauctum* (Link) Humphries subsp. *adauctum*  
 - *Argyranthemum adauctum* (Link) Humphries  
*Argyranthemum adauctum* (Link) Humphries subsp. *jacobiifolium* (Sch.Bip.) Humphries

- *Argyranthemum adauctum* (Link) Humphries  
 subsp. *jacobaeifolium* (Sch. Bip.) Humphries  
*Argyranthemum broussonetii* (Pers.) Humphries  
 subsp. *broussonetii*  
 - *Argyranthemum broussonetii* (Pers.)  
 Humphries  
*Argyranthemum callichrysum* (Svent.) Humphries  
 subsp. *gomerensis* O.W. White  
 - *Argyranthemum broussonetii* (Pers.)  
 Humphries subsp. *gomerensis* Humphries  
*Argyranthemum frutescens* (L.) Sch.Bip. subsp.  
*frutescens*  
 - *Argyranthemum frutescens* (L.) Sch.Bip.  
*Aria edulis* (Willd.) M. Roem.  
 - *Sorbus aria* (L.) Crantz  
*Aristida adscensionis* L. subsp. *adscensionis*  
 - *Aristida adscensionis* L.  
*Aristida adscensionis* L. subsp. *coerulescens* (Desf.)  
 Bourreil & Trouin ex Auquier & J. Duvign.  
 - *Aristida coerulescens* Desf.  
*Arthrocaulon macrostachyum* (Moric.) Piirainen &  
 G.Kadereit  
 - *Arthrocnemum macrostachyum* (Moric.)  
 K.Koch  
*Asparagus nesiotes* Svent. subsp. *nesiotes*  
 - *Asparagus nesiotes* Svent.  
*Asparagus umbellatus* Link subsp. *umbellatus*  
 - *Astragalus umbellatus* Link.  
*Asperula gemella* Airy Shaw & Turrill  
 - *Galium geminiflorum* Lowe  
*Asphodelus ramosus* L. subsp. *ramosus*  
 - *Asphodelus ramosus* L.  
*Asplenium aethiopicum* (Burm. f.) Bech. subsp.  
*dodecaploideum* A.F.Braithw.  
 - *Asplenium aethiopicum* subsp. *braithwaitii*  
 Ormonde  
*Asplenium aethiopicum* (Burm. f.) Bech. subsp.  
*filare* (Forssk.) A.F. Braithw.  
 - *Asplenium filare* (Forssk.) Aiton  
*Asplenium aethiopicum* (Burm. f.) Bech.  
 - *Asplenium filare* (Forssk.) Aiton  
*Asplenium aureum* Cav.  
 - *Ceterach aureum* (Cav.) Buch  
*Asplenium ceterach* L.  
 - *Ceterach officinarum* Willd.  
*Asplenium obovatum* Viv. subsp. *billotii* (F. W.  
 Schultz) O. Bolòs, Vigo, Masalles & Ninot  
 - *Asplenium billotii* F.W.Schultz  
*Asplenium sulcatum* Lam.  
 - *Asplenium marinum* L.  
*Asplenium trichomanes* L. subsp. *quadrivalens*  
 D.E.Mey.  
 - *Asplenium quadrivalens* (D.E. Meyer) Landolt

*Asteriscus graveolens* (Forssk.) Less. subsp.  
*stenophyllus* (Link) Greuter  
 - *Asteriscus stenophyllus* Kuntze  
*Astragalus mareoticus* Delile subsp. *handiensis*  
 (Bolle) G. Kunkel  
 - *Astragalus mareoticus* Delile  
*Athamanta cervariifolia* (DC.) DC.  
 - *Tinguarra cervariaefolia* (DC.) Parl.  
 - *Tinguarra cervariifolia* (DC.) Parl.  
*Athamanta montana* (Webb ex Christ) Spalik &  
 Wojew. & S.R.Downie  
 - *Tinguarra montana* (Webb ex Christ)  
 B.D.Jacks.  
*Atocion armeria* (L.) Raf.  
 - *Silene armeria* L.  
*Atractylis arbuscula* Svent & Michaelis subsp.  
*arbuscula*  
 - *Atractylis arbuscula* Svent. & Michaelis  
*Atractylis arbuscula* Svent & Michaelis subsp.  
*schizogynophylla* (Svent. & Kahne) Marrero  
 Rodr. & Caujapé  
 - *Atractylis arbuscula* Svent & Michaelis  
*Atriplex portulacoides* L.  
 - *Halimione portulacoides* (L.) Aellen  
*Avellinia festucoides* (Link) Valdés & H.Scholz  
 - *Rostraria festucoides* (Link) Romero Zarco  
*Avena barbata* Pott ex Link subsp. *barbata*  
 - *Avena barbata* Pott ex Link  
*Avena barbata* Pott ex Link subsp. *lusitanica*  
 (Tab.Morais) Romero Zarco  
 - *Avena barbata* Pott ex Link  
*Avena canariensis* B.R.Baum, Rajhathy &  
 D.R.Sampson  
 - *Avena barbata* Pott ex Link  
*Avena fatua* L. subsp. *meridionalis* Malzev  
 - *Avena fatua* L.  
*Avena sativa* L. subsp. *sativa*  
 - *Avena sativa* L.  
*Avena sterilis* L. subsp. *atherantha* (C. Presl) H.  
 Scholz  
 - *Avena atheranthera* C.Presl  
 - *Avena barbata* Pott ex Link  
*Avena sterilis* L. subsp. *ludoviciana* (Durieu) Gillet  
 & Magne  
 - *Avena ludoviciana* Dur.  
*Avena sterilis* L. subsp. *sterilis*  
 - *Avena sterilis* L.  
*Avena strigosa* Schreb.  
 - *Avena hispanica* Ard.  
*Barbarea verna* (Mill.) Asch.  
 - *Chenopodium hirsutum*  
 - *Kochia hirsuta*  
 - *Salsola hirsuta*  
 - *Spirobassia hirsuta* (L.) Freitag & G.Kadereit

- *Suaeda albid*
- *Suaeda crassifolia*
- Bassia scoparia* (L.) A.J.Scott
- *Kochia scoparia*
- Bassia tomentosa* (Lowe) Maire & Weiller
- *Chenoleoides tomentosa* (Lowe) Botsch.
- Begonia subvillosa* Klotzsch
- *Begonia schmidtiana* Regel
- Bellardia trixago* (L.) All.
- *Bartisa trixago* L.
- Bethencourtia hermosae* (Pit.) G.Kunkel
- *Senecio hermosae* Pit.
- Bethencourtia palmensis* (Nees) Choisy ex Link
- *Senecio palmensis* C.Sm.
- Bethencourtia rupicola* (B.Nord.) B.Nord
- *Canariothamnus rupicola* B.Nord.
- Biancaea decapetala* (Roth) O.Deg.
- *Caesalpinia decapetala* (Roth) Alston
- Biserrula pelecinus* L.
- *Astragalus pelecinus* (L.) Barneby
- Blechnum spicant* (L.) Sm.
- *Struthiopteris spicant* (L.) F.W. Weiss
- Bosea yervamora* L.
- *Bosea yermavora* L.
- Brachypodium distachyon* (L.) P.Beauv.
- *Trachynia distachya*
- Brachypodium glaucovirens* (Murb.) Sagorski
- *Brachypodium sylvaticum* (Huds.), P.Beauv. subsp. *glaucovirens* Murb.
- Bromus catharticus* Vahl.
- *Bromus willdenowii* Kunth
- *Ceratochloa cathartica* (Vall) Herter
- Bromus commutatus* Schrad. subsp. *decipiens* (Bomble & H. Scholz) H. Scholz
- *Bromus secalinus* L.
- Bromus hordeaceus* L. subsp. *hordeaceus*
- *Bromus parvispiculatus* H. Scholz
- Bromus hordeaceus* L.
- *Bromus hordeaceus* L. subsp. *molliformis* (J. Lloyd) & Maire
- Bromus rubens* L. subsp. *kunkelii* (H.Scholz) H.Scholz
- *Bromus kunkelii* (H. Scholz) H. Scholz
- Bromus rubens* L.
- *Anisantha rubens* L.
- Bromus secalinus* L.
- *Bromus commutatus* Schrad. subsp. *decipiens* (Bomble & H. Scholz) H. Scholz
- Bromus x ferronii* Mabilie
- *Bromus ferronii* Mabilie
- *Bromus hordeaceus* subsp. *ferronii* (Mabilie) P.M.Sm.
- *Bromus x pseudothominei*
- Bromus x pseudothominei* P.M. Sm.
- *Bromus hordeaceus* subsp. *pseudothominii*

- (P.M.Sm.) H.Scholz
- *Bromus pseudothominei* Sm.
- *Bromus x ferronii* Mabilie
- Brugmansia arborea* (L.) Sweet
- *Brugmansia arborea* (L.) Steud.
- Brugmansia sanguinea* (Ruiz & Pav.) D.Don
- *Datura sanguinea*
- Brugmansia x candida*
- *Brugmansia arborea* (L.) Steud.
- Bufoia paniculata* Dubois subsp. *teneriffae* Kunkel
- *Bufoia teneriffae* Christ
- Buglossoides arvensis* (L.) I.M.Johnst.
- *Lithospermum arvense* L.
- Bystropogon origanifolius* L'Hér. var. *origanifolius*
- *Bystropogon origanifolius* L'Hér.
- Calamagrostis arenaria* (L.) Roth
- *Ammophila arenaria* (L.) Link
- *Calamagrostis littoralis* (P.B.) G.H. Loos
- Calendula arvensis* M.Bieb.
- *Calendula aegyptiaca* Desf.
- *Calendula arvensis* (Vaill.) L.
- *Calendula bicolor* Raf.
- Callianthe megapotamica* (A. Spreng.) Dorr
- *Abutilon megapotamicum* (A.Spreng.) A.St.-Hil. & Naudin
- Callistemon viminalis* (Sol. ex Gaertn.) G.Don
- *Melaleuca viminalis* (Sol. ex Gaertn.) Byrnes
- Camelina microcarpa* Andr. ex DC.
- *Camelina sativa* Boiss.
- Campsis radicans* (L.) Seem.
- *Campsis radicans* (L.) Bureau
- Canaria tortuosa* (Webb & Berthel.) Jim.Mejías & P.Vargas
- *Seseli webbii* Coss
- Carduus baeocephalus* Webb subsp. *baeocephalus*
- *Carduus baeocephalus* Webb
- Carex demissa* Hornem. subsp. *cedercreutzii* (Fagerstr.) Jac.Koopman
- *Carex viridula* Michx. subsp. *oedocarpa* (Andersson) B. Schmid
- Carex demissa* Hornem.
- *Carex viridula* Michx.
- Carex divulsa* Stokes subsp. *divulsa* (Stokes) Celak.
- *Carex divulsa* Stokes
- Carex leersii* F.W. Schultz
- *Carex cuprina* (Sándor ex Heuff.) Nendtv. ex A.Kern.
- *Carex guestphalica* (Boenn. ex Rchb.) Boenn. ex Lange
- *Carex polyphylla*
- Carex muricata* L.
- *Carex pairae* F.W.Schultz

- Carex otrubae* Podp.  
- *Carex cuprina* (Sándor ex Heuff.) Nendtv. ex A.Kern.
- Carex pairae* F.W.Schultz  
- *Carex muricata* L. subsp. *pairae* (F. W. Schultz) Čelak.
- Carlina falcata* Svent.  
- *Carlina salicifolia* (L.f.) Cav.
- Carlina salicifolia* (L.f.) Cav. subsp. *salicifolia*  
- *Carlina salicifolia* (L.f.) Cav.
- Carlina texedae* Marrero Rodr.  
- *Carlina canariensis* Pit.
- Caroxylon tetrandrum* (Forssk.) Akhani & Roalson  
- *Salsola tetrandra* Forssk.
- Caroxylon vermiculatum* (L.) Akhani & Roalson  
- *Salsola vermiculata* L.
- Carthamus caeruleus* L.  
- *Carduncellus caeruleus* C. Presl
- Catapodium rigidum* (L.) C.E.Hubb. subsp. *rigidum*  
- *Catapodium rigidum* (L.) C.E.Hubb.
- Ceiba speciosa* (A.St.-Hil., A.Juss. & Cambess.) Ravenna  
- *Chorisia speciosa* A.St.-Hil., A.Juss. & Cambess.
- Celosia argentea* L.  
- *Celosia cristata* L.
- Cenchrus americanus* (L.) Morrone  
- *Pennisetum glaucum* (L.) R.Br.
- Cenchrus caudatus* (Schr.) Kuntze  
- *Cenchrus macrourus* (Trin.) Morrone  
- *Pennisetum macrourum* Trin.
- Cenchrus clandestinus* (Hochst. ex Chiov.) Morrone  
- *Kikuyuochloa clandestina* (Hochst. ex Chiov.) H.Scholz  
- *Pennisetum clandestinum* Hochst. ex Chiov.
- Cenchrus divisus* (J.F.Gmel.) Verloove, Govaerts & Buttler  
- *Pennisetum divisum* (Forssk. Ex J.F.Gmel.) Henrard
- Cenchrus geniculatus* Thunb.  
- *Pennisetum thunbergii* Kunth
- Cenchrus longisetus* M.C. Johnst.  
- *Pennisetum villosus* Fresen.
- Cenchrus orientalis* (Rich.) Morrone  
- *Pennisetum orientale* Rich.
- Cenchrus purpureus* (Schumach.) Morrone  
- *Pennisetum purpureum* Schumach.
- Cenchrus setaceus* (Forssk.) Morrone  
- *Pennisetum setaceum* (Forssk.) Chiov.
- Centaurea gentilii* Braun-Blanq. & Maire  
- *Centaurea aspera* L. subsp. *gentilii* (Braun-Blanq. & Maire) Dobignard
- Cerastium holosteoides* Fr.  
- *Cerastium fontanum* subsp. *vulgare* (Hartm.) Greuter & Burdet
- Ceropegia dichotoma* Haw. subsp. *hians* Svent.  
- *Ceropegia hians* Svent.
- Ceropegia dichotoma* Haw.  
- *Ceropegia hians* Svent.
- Chamaecytisus prolifer* (L.f.) Link subsp. *angustifolius* (Kuntze) G. Kunkel  
- *Chamaecytisus proliferus* (L.f.) Link subsp. *angustifolius* (Kuntze) G. Kunkel  
- *Cytisus proliferus* L.f. *angustifolius* Kuntze
- Chamaecytisus prolifer* (L.f.) Link subsp. *meridionalis* Acebes  
- *Chamaecytisus proliferus* (L.f.) Link subsp. *meridionalis* Acebes  
- *Cytisus proliferus* L.f. subsp. *meridionalis* Acebes
- Chamaecytisus prolifer* (L.f.) Link subsp. *palmensis* H.Christ  
- *Chamaecytisus proliferus* var. *palmensis* H.Christ  
- *Chamaecytisus proliferus* (L.f.) Link subsp. *palmensis* (Christ) Hans. & Sunding  
- *Cytisus proliferus* L.f. subsp. *palmensis* Christ
- Chamaecytisus prolifer* (L.f.) Link subsp. *prolifer*  
- *Chamaecytisus proliferus* (L.f.) Link  
- *Cytisus proliferus* L.f.
- Chamaecytisus prolifer* (L.f.) Link var. *canariae* (H.Christ) G. Kunkel  
- *Chamaecytisus proliferus* (L.f.) Link  
- *Cytisus proliferus* L.f.
- Chamaecytisus prolifer* (L.f.) Link var. *hierrensis* (Pit.) Acebes  
- *Chamaecytisus proliferus* (L.f.) Link  
- *Cytisus proliferus* L.f.
- Chamaecytisus prolifer* (L.f.) Link  
- *Chamaecytisus proliferus* (L.f.) Link  
- *Cytisus proliferus* L.f.
- Cheilanthes tirajanae* T.S. Velazquez  
- *Oeosporangium tirajanae* (T.S.Velázquez)
- Cheirolophus burchardii* Susanna  
- *Cheirolophus canariensis* (Willd.) Holub var. *subexpinnata* (Burch.) A.Hans. & Sund.  
- *Cheirolophus canariensis* (Willd.) subsp. *subexpinnatus* (Burch.) G.Kunkel
- Cheirolophus junonianus* (Svent.) Holub subsp. *isoplexiphyllus* (Svent.) G.Kunkel  
- *Cheirolophus junonianus* (Svent.) Holub var. *isoplexifolius* (Svent.) Kunkel
- Cheirolophus junonianus* (Svent.) Holub subsp. *junonianus*  
- *Cheirolophus junonianus* (Svent.) Holub var. *junonianus*
- Cheirolophus sventenii* (A.Santos) G.Kunkel subsp. *sventenii*  
- *Cheirolophus sventenii* (A.Santos) G.Kunkel

- Chenopodiastrum coronopus* (Moq.) S.Fuentes,  
Uotila & Borsch  
- *Chenopodium coronopus* Moq.
- Chenopodiastrum murale* (L.) S.Fuentes, Uotila &  
Borsch  
- *Chenopodium murale* L.
- Chenopodium nutans* (R.Br.) S.Fuentes & Borsch  
- *Einadia nutans* (R.Br.) A.J.Scott
- Chenopodium probstii* Aellen  
- *Chenopodium album* L.
- Chrysojasminum odoratissimum* (L.) Banfi  
- *Jasminum odoratissimum* L.
- Cistus ladanifer* L. subsp. *maculatus* Dunal ex DC.  
- *Cistus ladanifer* L.
- Cistus monspeliensis* L. subsp. *canariensis* Rivas-  
Mart., Martín-Osorio & Wildpret  
- *Cistus monspeliensis* L.
- Cistus ochreateus* C. Sm. ex Buch  
- *Cistus ocreatus* [Deviating spelling]
- Cistus osbeckiifolius* Webb ex Christ subsp.  
*tomentosus* Bañares & Demoly  
- *Cistus osbeckiifolius* Webb
- Citrus x aurantium* L.  
- *Citrus aurantium* L.
- Citrus x limon* (L.) Osbeck  
- *Citrus x limon* (L.) Burm. fil.  
- *Citrus limon* (L.) Osbeck
- Cleistocactus hyalacanthus* (K.Schum.) Rol.-Goss.  
- *Cleistocactus hyalacanthus* Backeb.
- Cleistocactus straussii* (Heese) Backeb.  
- *Borzicactus straussii* A. Berger
- Clerodendrum speciosissimum* Van Geert ex  
Drapiez  
- *Clerodendrum speciosissimum* Drapiez
- Clinopodium menthifolium* (Host) Stace subsp.  
*ascendens* (Jord.) Govaerts  
- *Calamintha ascendens*
- Clinopodium nepeta* (L.) Kuntze subsp. *nepeta*  
- *Calamintha nepeta* (L.) Roth var. *nepeta*
- Clinopodium nepeta* (L.) Kuntze  
- *Calamintha nepeta* (L.) Roth
- Cneorum pulverulentum* Vent  
- *Neochamaelea pulverulenta* (Vent.) Erdtman
- Colchicum hierrense* (A.Santos) J.C.Manning &  
Vinn.  
- *Androcymbium hierrense* A. Santos
- Colchicum psammophilum* (Svent.) J.C.Manning &  
Vinn.  
- *Androcymbium psammophilum* Svent.
- Coleus scutellarioides* (L.) Benth.  
- *Plectranthus scutellarioides* (L.) R.Br.
- Colletia paradoxa* (Spreng.) Escal.  
- *Colletia cruciata* Gillies & Hook.
- Combretum indicum* (L.) DeFilipps  
- *Quisqualis indica* L.
- Commicarpus helenae* (J. A. Schult.) Meikle  
- *Boerhavia helenae* (Roem. & Schult.) Meikle
- Convolvulus fruticosus* Desr. subsp. *fruticosus*  
- *Convolvulus subauriculatus* (Burchard)  
Linding.
- Convolvulus fruticosus* Desr. subsp. *glandulosus*  
(Webb) J.R.I.Wood & Scotland  
- *Convolvulus glandulosus* (Webb) Hallier f.
- Convolvulus perraudieri* Coss.  
- *Convolvulus fruticosus* Desr. subsp.  
*fruticosus*
- Convolvulus siculus* L. subsp. *elongatus* Batt.  
- *Convolvulus siculus* L. subsp. *agrestis* (Hochst.  
ex Schweinf.) Verdc.
- Convolvulus subauriculatus* (Burchard) Linding.  
- *Convolvulus fruticosus* Desr. subsp.  
*fruticosus*
- Corymbia citriodora* (Hook.) K.D.Hill &  
L.A.S.Johnson  
- *Corymbia variegata* (F.Muell.) K.D. Hill &  
L.A.S. Johnson
- Corymbia ficifolia* (F.Muell.) K.D.Hill &  
L.A.S.Johnson  
- *Eucalyptus ficifolia* F.Muell.
- Cosentinia vellea* (Aiton) Tod. subsp. *bivalens*  
(Reichstein) Rivas Mart. & Salvo  
- *Cheilanthes vellea* (Aiton) F.Muell. subsp.  
*bivalens* (Reichst.) Rivas Mart. & Salvo  
- *Cosentinia bivalvens* (Reichst.) Hansen &  
Sunding
- Cosentinia vellea* (Aiton) Tod.  
- *Cheilanthes vellea* (Aiton) F.Muell.
- Cotyledon macrantha* A.Berger  
- *Cotyledon orbiculata* L.
- Crambe gomeraea* Webb ex Christ subsp.  
*gomeraea*  
- *Crambe gomerae* [Deviating spelling]
- Crambe gomeraea* Webb ex Christ subsp. *hirsuta*  
A.Prina  
- *Crambe gomerae* [Deviating spelling]
- Crambe gomeraea* Webb ex Christ  
- *Crambe gomerae* [Deviating spelling]
- Crambe santosii* Bramwell  
- *Crambe gigantea* (Ceballos & Ortuño)  
Bramwell
- Crassula muscosa* L.  
- *Crassula lycopodioides* Lam.
- Crepis juvenalis* (Delile) Babç.  
- *Crepis juvenalis* F.W.Schult
- Crepis vesicaria* L. subsp. *taraxacifolia* (Thuill.)  
Thell.  
- *Crepis taraxifolia* Thuill.  
- *Crepis vesicaria* var. *taraxacifolia* (Thuill.)  
Boivin

- Crepis vesicaria* L.  
 - *Crepis taraxifolia* Thuill.  
 - *Crepis vesicaria* var. *taraxacifolia* (Thuill.) Boivin
- Crinum asiaticum* L. var. *pedunculatum* (R.Br.) Fosberg & Sachet  
 - *Crinum pedunculatum* R.Br.
- Crocasmia x crocosmiiflora* (Lemoine) N.E.Br.  
 - *Crocasmia crocosmiiflora* (Lemoine) N.E.Br.
- Curio talinoides* (DC.) P.V.Heath var. *aizoides* (DC.) P.V.Heath  
 - *Kleinia aizoides* DC.
- Cuscuta campestris* Yunck.  
 - *Cuscuta pentagona* Engelm.
- Cyclosporum leptophyllum* (Pers.) Sprague  
 - *Ciclospermum leptophyllum* (Pers.) Sprague
- Cylindropuntia imbricata* (Haw.) F.M. Knuth subsp. *rosea* (DC.) M.A.Baker  
 - *Cylindropuntia pallida* (Rose) F.M. Knuth  
 - *Cylindropuntia rosea* (DC.) Backeb.
- Cynomorium coccineum* L. subsp. *coccineum*  
 - *Cynomorium coccineum* L.
- Cynosurus elegans* Desf.  
 - *Cynosurus effusus* Link in Schrad
- Cyperus alternifolius* L. subsp. *flabelliformis* Kük.  
 - *Cyperus involu-gratus* Rottb.
- Cyperus alternifolius* L.  
 - *Cyperus involu-gratus* Rottb.
- Cyperus brevifolius* (Rottb.) Hassk.  
 - *Kyllinga brevifolia* Rottb.
- Cyperus laevigatus* L. subsp. *distachyos* (All.) Ball  
 - *Cyperus distachyos* All.
- Cyperus laevigatus* L. subsp. *laevigatus*  
 - *Cyperus laevigatus* L.
- Cyperus mundii* (Nees) Kunth  
 - *Pycnus mundii* Nees
- Cyperus polystachyos* Rottb.  
 - *Pycnus polystachyos* (Rottb.) P.Beauv.
- Cysticapnos versicaria* (L.) Fedde  
 - *Corydalis vesicaria* (L.) Pers.  
 - *Cysticapnos vesicarius* [Deviating spelling]
- Cystopteris diaphana* (Bory) Blasdel subsp. *cleoae* (A. Peroni & G. Peroni) A. Peroni & G. Peroni  
 - *Cystopteris fragilis* subsp. *diaphana* (Bory) Litard.
- Cystopteris diaphana* (Bory) Blasdel  
 - *Cystopteris fragilis* subsp. *diaphana* (Bory) Litard.
- Cystopteris fragilis* (L.) Bernh. subsp. *diaphana* (Bory) Litard  
 - *Cystopteris diaphana* (Bory) Blasdel  
 - *Cystopteris fragilis* (L.) Bernh.  
 - *Cystopteris viridula* (Desv.) Desv.
- Cystopteris fragilis* (L.) Bernh.  
 - *Cystopteris viridula* (Desv.) Desv.
- Cytisus filipes* Webb  
 - *Spartocytisus filipes*
- Cytisus supranubius* (L. f.) Kuntze  
 - *Spartocytisus supranubius* (L. f.) Christ ex G. Kunkel
- Dactylis glomerata* L. subsp. *hispanica* (Roth) Nyman  
 - *Dactylis hispanica* Roth
- Dactylis metlesicsii* P.Schönfelder & D.Ludw.  
 - *Dactylis glomerata* L.
- Dactylis smithii* Link. subsp. *hylodes* P. F. Parker  
 - *Dactylis glomerata* L.
- Dactylis smithii* Link.  
 - *Dactylis glomerata* subsp. *smithii*  
 - *Dactylis smithii* Link in Buch
- Dasispermum capense* (Lam.) Magee & B.-E.van Wyk  
 - *Torilis africana* (Thunb.) Spreng.
- Datura innoxia* Mill.  
 - *Datura innoxia* Mill.
- Daucus carota* L. subsp. *maximus* (Desf.) Ball  
 - *Daucus maximus* Desf.
- Daucus elegans* (Webb ex Bolle) Spalik, Banasiak & Reduron  
 - *Cryptotaenia elegans* Webb ex Bolle
- Daucus pumilus* (L.) Hoffmanns. & Link  
 - *Pseudorlaya pumila* (L.) Grande
- Delairea odorata* Lem.  
 - *Senecio mikanioides* Otto ex Walp.
- Delphinium ajacis* L.  
 - *Consolida ajacis* (L.) Schur
- Delphinium consolida* L.  
 - *Consolida regalis* Gray
- Descurainia gonzalezii* Svent.  
 - *Descirainia gonzalezi* [Deviating spelling]
- Desmanthus virgatus* (L.) Willd.  
 - *Desmanthus pernam-bucanus* (L.) Thell.
- Digitalis canariensis* L.  
 - *Isoplexis canariensis* (L.) Loudon
- Digitalis chalcantha* (Svent. & O'Shan.) Albach, Bräuchler & Heubl  
 - *Isoplexis chalcantha* Svent. & O'Shan.
- Digitalis isabelliana* (Webb) Linding.  
 - *Isoplexis isabelliana* (Webb & Berthel.) Mansf.
- Dimorphotheca ecklonis* DC.  
 - *Osteospermum ecklonis* Thunb. (DC.) Norl.
- Diplachne fusca* (L.) P.Beauv. ex Roem. & Schult. subsp. *uninervia* (J.Presl) P.M.Peterson & N.Snow  
 - *Leptochloa fusca* (L.) Kunth subsp. *uninerva* (J. Presl) P. M. Peterson & N. Snow
- Diplachne fusca* (L.) P.Beauv. ex Roem. & Schult.  
 - *Leptochloa fusca* (L.) Kunth
- Dipsacus fullonum* L.  
 - *Dipsacus sativus* (L.) Honck.

- Distimake tuberosus* (L.) A.R.Simões & Staples  
 - *Merremia tuberosa* (L.) Rendle  
*Dombeya wallichii* (Lindl.) K.Schum.  
 - *Dombeya wallichii* (Lindl.) Benth. & Hook. fil.  
*Dovyalis caffra* (Hook.f. & Harv.) Warb.  
 - *Dovyalis caffra* (Hook.f. & Harv.) Sim  
*Draba verna* L.  
 - *Erophila verna* (L.) Chevall.  
*Dracaena draco* (L.) L. subsp. *draco*  
 - *Dracaena draco* (L.) L.  
*Dracaena stuckyi* (God.-Leb.) Byng & Christenh.  
 - *Sansevieria stuckyi* God.-Leb.  
*Dracaena trifasciata* (Prain) Mabb.  
 - *Sansevieria trifasciata* Prain  
*Dryopteris abbreviata* (Lam. & DC.) Newman  
 - *Dryopteris affinis* (Lowe) Fraser-Jenk.  
*Dryopteris oligodonta* Pic.Serm.  
 - *Echinocereus rigidissimus* (Engelm.) F.Haage  
*Duranta erecta* L.  
 - *Duranta repens* L.  
*Dypsis lutescens* (H.Wendl.) Beentje & J.Dransf.  
 - *Chrysalidocarpus lutescens* H.Wendl.  
*Dysphania ambrosioides* (L.) Mosyakin & Clemants  
 - *Chenopodium ambrosioides* L.  
*Dysphania anthelmintica* (L.) Mosyakin & Clemants  
 - *Dysphania ambrosioides* (L.) Mosyakin & Clemants  
*Dysphania multifida* L.) Mosyakin & Clemants  
 - *Chenopodium multifidum* L.  
*Ecballium elaterium* (L.) A.Rich. subsp. *dioicum*  
 (Batt.) Costich  
 - *Ecballium elaterium* (L.) A.Rich. var. *dioicum*  
 Batt.  
*Echinocereus rigidissimus* (Engelm.) Hirscht  
 - *Echinocereus rigidissimus* (Engelm.) F.Haage  
*Echinochloa colonum* (L.) Link  
 - *Echinochloa colona* (L.) Link  
*Echinochloa crus-galli* (L.) P.Beauv. subsp. *crus-galli*  
 - *Echinochloa crus-galli* (L.) P.Beauv.  
*Echinochloa crus-galli* (L.) P.Beauv. subsp. *spiralis*  
 (Vasinger) Tzvelev  
 - *Echinochloa crus-galli* (L.) P.Beauv.  
*Echinopsis huascha* (Web.) Friedrich & G.D.Rowley  
 - *Trichocereus huascha* (F.A.C. Weber) Britton & Rose  
*Echinopsis lageniformis* (C.F.Först.) H.Friedrich & G.D.Rowley  
 - *Echinopsis bridgesii* Salm-Dyck  
 - *Trichocereus bridgesii* (Salm-Dyck) Britton & Rose  
*Echinopsis spachiana* (Lem.) Riccob.  
 - *Echinopsis spachiana* (Lem.) H. Friedrich & G. D. Rowley  
 - *Trichocereus spachianus* (Lem.) Riccob.  
*Echinopsis volliana* H.Friedrich & G.D.Rowley  
 - *Trichocereus vollianus* Backeb.  
*Echium decaisnei* Webb & Berthel. subsp. *purpurium* Bramwell  
 - *Echium famarae* Lems & Holzapfel  
*Echium perezii* Sprague  
 - *Echium wildpretii* H.Pearson ex Hook.f. subsp. *trichosiphon* (Svent.) Bramwell  
*Echium pitardii* A. Chev.  
 - *Echium lancerottense* Lems & Holzapfel  
*Echium thyrsoiflorum* Masson ex Link  
 - *Echium decaisnei* Webb & Berthel.  
 - *Echium gentianoides* Webb ex Coincy  
*Echium x bondspraguei* Sprague & Hutch.  
 - *Echium x bond-spraguei* Sprague & Hutch.  
*Eleusine africana* Kenn.-O'Byrne  
 - *Eleusine indica* (L.) Gaertn. subsp. *africana*  
 (Kenn.-O'Byrne) S.M. Phillips  
*Eleusine indica* (L.) Gaertn. subsp. *indica*  
 - *Eleusine indica* (L.) Gaertn.  
*Epilobium angustifolium* L.  
 - *Chamaenerion angustifolium*  
*Epilobium glandulosum* Lehm.  
 - *Epilobium ciliatum* subsp. *glandulosum*  
 (Lehm.) Hoch & P.H.Raven  
*Epilobium tetragonum* L. subsp. *lamyi*  
 (F.W.Schultz) Nyman  
 - *Epilobium lamyi* F.W.Schultz  
*Epilobium tetragonum* L. subsp. *tetragonum*  
 - *Epilobium tetragonum* L.  
*Eragrostis barrelieri* Daveau subsp. *pygmaea*  
 (Daveau) Portal & Scholz  
 - *Eragrostis barrelieri* Daveau  
*Erica canariensis* Rivas Mart., Martin Osorio & Wildpret  
 - *Erica arborea* L.  
*Erica platycodon* L. subsp. *platycodon*  
 - *Erica platycodon* (Webb & Berthel.) Rivas Mart. & al.  
*Erica platycodon* L.  
 - *Erica scoparia* L. subsp. *platycodon* (Webb & Berthel.) A.Hansen & G.Kunkel  
 - *Erica scoparia* L.  
*Erigeron bonariensis* L.  
 - *Conyza bonariensis*  
*Erigeron floribundus* (Kunth) Sch.Bip.  
 - *Conyza floribunda* Kunth.  
 - *Erigeron floribundum* Humb., Bonpl. & Kunth  
*Erigeron sumatrensis* Retz.  
 - *Conyza sumatrensis* (Retz.) E. H. Walker  
*Erodium pulverulentum* (Cav.) Willd.  
 - *Erodium laciniatum* (Cav.) Willd. subsp. *pulverulentum* (Cav.) Batt.



- Eruca vesicaria* (L.) Cav.  
- *Eruca sativa* Mill.
- Erysimum albescens* (Webb & Berthel.) Bramwell  
- *Erysimum scoparium* (Brouss. ex Willd.) Wettst.
- Erysimum bicolor* (Hornem.) DC.  
- *Dichroanthus virescens* Webb ex Hohenest. & Welss
- Erysimum virescens* (Webb ex Christ) Wettst.  
- *Erysimum mutabile* [Deviating spelling]  
- *Erysimum mutabile* Boiss. & Heldr.
- Erythrostemon gilliesii* (Hook.) Klotzsch  
- *Caesalpinia gilliesii* (Hook.) D.Dietr.
- Eucalyptus camaldulensis* Dehnh. subsp. *camaldulensis*  
- *Eucalyptus camaldulensis* Dehnh.
- Eucalyptus lehmannii* (Schauer) Benth. subsp. *lehmannii*  
- *Eucalyptus lehmannii* (Schauer) Benth.
- Eudianthe coeli-rosa* (L.) Fenzl ex Endl.  
- *Eudianthe coeli-rosa* (L.) Endl.  
- *Silene coeli-rosa* (L.) Godr.
- Euphorbia balsamifera* Aiton subsp. *balsamifera*  
- *Euphorbia balsamifera* Aiton
- Euphorbia bourgeana* J.Gay ex Boiss.  
- *Euphorbia lambii* Svent.
- Euphorbia heterophylla* L. var. *cyathophora* (Murray) Griseb.  
- *Euphorbia cyathophora* Murray
- Euphorbia hirsuta* L.  
- *Euphorbia pubescens* Vahl
- Euphorbia lamarckii* Sweet subsp. *broussonetii* (Willd. ex Link) Molero & Rovira  
- *Euphorbia lamarckii* Sweet subsp. *wildpretii* (Molero & Rovira) Rivas Mart. & Gaisberg
- Euphorbia lambii* Svent.  
- *Euphorbia bourgeana* J.Gay ex Boiss.
- Euphorbia murielii* N.E.Br.  
- *Euphorbia candelabrum* Trémaux ex Kotschy
- Euphorbia peplus* L. subsp. *minima* DC.  
- *Euphorbia peplus* var. *minima*
- Feijoa sellowiana* (O.Berg) O.Berg  
- *Acca sellowiana* (O.Berg) Burret
- Felicia amoena* (Sch.Bip.) Levyns  
- *Ferula amoena* subsp. *amoena*
- Ferocactus herrerae* J.G.Ortega  
- *Ferocactus wislizenii* subsp. *herrerae* (J. G. Ortega) Pilbeam & Bowdery
- Ferula communis* L. subsp. *linkii* (Webb) Reduron & Dobignard  
- *Ferula linkii* Webb
- Ferula lancerotensis* Parl. ex Hartung  
- *Ferula lancerottensis* Parl.
- Festuca alopecuros* Schousb.  
- *Vulpia alopecuros* (Schousb.) Link
- Festuca ambigua* Le Gall  
- *Vulpia ciliata* Dumort.
- Festuca bromoides* L.  
- *Vulpia bromoides* (L.) Gray
- Festuca geniculata* (L.) Lag. & Rodr.  
- *Vulpia geniculata* (L.) Link
- Festuca maritima* L.  
- *Festuca unilateralis* (L.) Schrad.  
- *Vulpia unilateralis* (L.) Stace
- Festuca membranacea* (L.) Druce  
- *Vulpia membranacea* (L.) Dumort.
- Festuca muralis* Kunth  
- *Vulpia muralis* (Kunth.) Nees
- Festuca myuros* L. subsp. *myuros*  
- *Vulpia myuros* (L.) C.C.Gmel. subsp. *myuros*
- Festuca myuros* L.  
- *Vulpia myuros* (L.) C.C.Gmel.
- Ficus lyrata* Warb.  
- *Ficus pandurata* Hort. Sander
- Filago germanica* (L.) Huds.  
- *Filago vulgaris* Lam.
- Foeniculum vulgare* Mill. var. *piperitum* (C.Presl) Ball  
- *Foeniculum vulgare* Mill. subsp. *piperitum* (Ucria) Coutinho  
- *Foeniculum vulgare* Mill.
- Frankenia hirsuta* L.  
- *Frankenia capitata* Webb & Berthel.
- Fumaria muralis* Sond. ex W.D.J.Koch subsp. *boraei* (Jord.) Pugsley  
- *Fumaria boraei* Jord.
- Furcraea hexapetala* (Jacq.) Urb.  
- *Agave vivipara* Arruda non A.viv. L.
- Furcraea selloana* Koch  
- *Furcraea selloa* [Deviating spelling]
- Furcraea tuberosa* (Mill.) Aiton  
- *Agave angustifolia* Haw.  
- *Agave tuberosa* Mill.
- Galium aschenbornii* Schauer  
- *Galium geminiflorum* M. Martens & Galeotti
- Gamochaeta antillana* (Urb.) Anderb.  
- *Gamochaeta antillana* (Urb.) Anderb. [Deviating spelling]  
- *Gnaphalium antillanum* Urb.
- Gamochaeta pensylvanica* (Willd.) Cabrera  
- *Gnaphalium pensylvanicum* Willd.
- Genista benehoavensis* (Bolle) del Arco  
- *unspecified*
- Geranium palustre* L.  
- *Geranium purpureum* Gilib.
- Geranium purpureum* Vill.  
- *Geranium palustre* L.
- Glebionis coronaria* (L.) Cass. Ex Spach  
- *Chrysanthemum coronarium* L.

*Gnidia polystachya* P.J.Bergius  
 - *Gnidia squarrosa* (L.) Druce  
*Gonospermum ferulaceum* (Webb) Febles var.  
*ferulaceum*  
 - *Gonospermum ferulaceum* (Webb & Berthel.)  
 Febles  
*Gonospermum revolutum* (C.Sm. ex Buch) Sch.Bip.  
 - *Lugoa revoluta* (C.Sm. ex Buchinger) DC.  
*Gymnocarpos decander* Forssk.  
 - *Gymnocarpos decandrus*  
*Gymnocarpos sclerocephalus* (Decne.) Dahlgren &  
 Thulin  
 - *Sclerocephalus arabicus* (Desn.)Boiss.  
*Gypsophila vaccaria* (L.) Sm.  
 - *Vaccaria hispanica* (Mill.) Rauschert  
*Haageocereus multangularis* (Haw.) F. Ritter  
 - *Haageocereus kagenekii* (C.C.Gmel.) Mottram  
*Hedypnois rhagadioloides* (L.) F.W.Schmidt  
 - *Hedypnois cretica* (L.) Dum.Cours.  
*Helichrysum luteoalbum* (L.) Rchb.  
 - *Laphangium luteoalbum* (L.) Tzelev  
*Helichrysum teydeum* (Wildpret & Greuter) Raus  
*Helichrysum teydeum* (Wildpret & Greuter) Raus  
 - *Laphangium teydeum* Wildpret & Greuter  
 - *Laphangium teydeum* Wildpret & Greuter  
*Heliotropium arborescens* L.  
 - *Heliotropium peruvianum* L.  
*Heliotropium crispum* Desf.  
 - *Heliotropium erosum* Lehm.  
 - *Heliotropium ramosissimum* (Lehm.) Sieber ex  
 DC.  
*Helminthotheca echioides* (L.) Holub  
 - *Picris echioides* L.  
*Hemionitis gluckuk* Christenh.  
 - *Notholaena subcordata* (Cav.) Desv.  
 - *Paragymnopteris marantae* (L.) K.H.Shing  
*Hemionitis guanchica* (Bolle) Christenh.  
 - *Allosorus guanchicus* (Bolle) Christenh.  
 - *Cheilanthes guanchica* Bolle  
*Hemionitis pteridioides* (Reichard) Christenh.  
 - *Allosorus pteridioides* Reichard & Christenh.  
 - *Cheilanthes maderensis* Lowe  
 - *Cheilanthes pteridioides* C.Chr.  
*Hemionitis pulchella* (Bory ex Willd.) Christenh.  
 - *Allosorus fragilis* Christenh.  
*Hemionitis tinaei* (Tod.) Christenh.  
 - *Allosorus tinaei* (Tod.) Christenh.  
 - *Cheilanthes tinaei* Tod.  
*Heptapleurum arboricola* Hayata  
 - *Schefflera arboricola* (Hayata) Merr.  
*Herniaria cinerea* DC.  
 - *Herniaria hirsuta* L. subsp. *cinerea* (DC.) Cout.  
*Herniaria hartungii* Parl.  
 - *Herniaria cinerea* DC.

*Hesperocyparis macrocarpa* (Hartw.) Bartel  
 - *Cupressus macrocarpa* Hartw.  
*Holcus hierrensis* (Stierst.) Stierst. & M.Seq.  
 - *Holcus mollis* L. subsp. *hierrensis* Stierst.  
*Hordeum murinum* L. subsp. *glaucum* (Steud)  
 Tzvelev  
 - *Hordeum glaucum* Steud.  
*Hordeum murinum* L. subsp. *leporinum* (Link)  
 Arcang.  
 - *Hordeum leporinum* Link  
*Hymenophyllum wilsonii* Hook  
 - *Hymenophyllum peltatum* (Poir) Desv. (ACC in  
 POWO! dh nicht syn!)  
*Hyparrhenia hirta* (L.) Stapf  
 - *Hyparrhenia sinaica* (Delie) G.Lopez  
*Hyparrhenia rufa* (Nees) Stapf subsp. *altissima*  
 (Stapf) B. K. Simon  
 - *Hyparrhenia rufa* (Nees) Stapf var. *rufa*  
*Hyparrhenia sinaica* (Delile) G.Lopez  
 - *Hyparrhenia hirta* (L.) Stapf  
*Hypochaeris achyrophorus* L.  
 - *Achyrophorus valdesii* F.J. Jimenez, M.A. Ortiz  
 & M. Talavera  
*Ifloga obovata* Bolle  
 - *Ifloga spicata* (Forssk.) Sch. Bip. subsp.  
*obovata* (Bolle) G. Kunkel  
*Impatiens sodenii* Engl. & Warb.  
 - *Impatiens oliveri* C.H.Wright ex W.Watson  
*Ipomoea corymbosa* (L.) Roth  
 - *Turbina corymbosa* (L.) Raf.  
*Ipomoea imperati* (Vahl) Griseb  
 - *Ipomoea arenaria* Roem. & Schult.  
 - *Pharbitis preauxii* Webb & Berthel.  
*Ipomoea indica* (Burm.) Merr.  
 - *Ipomoea acuminata* (Vahl) Roem. & Schult.  
*Ipomoea nil* (L.) Roth  
 - *Ipomoea hederacea* Jacq.  
*Iresine diffusa* Humb. & Bonpl. ex Willd.  
 - *Iresine herbstii* Hook.  
*Iris florentina* L.  
 - *Iris albicans* Lange  
 - *Iris germanica* L.  
*Iris x germanica* L.  
 - *Iris germanica* L.  
*Jacobaea maritima* (L.) Pelser & Meijden subsp.  
*maritima*  
 - *Jacobaea maritima* (L.) Pelser & Meijden  
*Jasminum mesnyi* Hance  
 - *Jasminum primulinum* Hensl.  
*Juncus acutus* L. subsp. *acutus*  
 - *Juncus acutus* L.  
*Juniperus canariensis* Guyot & Mathou  
 - *Juniperus phoenicea* var. *turbinata* (Guss.)  
 Parl.

*Juniperus turbinata* Guss  
 - *Juniperus phoenicea* L. var. *turbinata*  
*Justicia floribunda* (J.J.Veitch) Wassh.  
 - *Justicia rizzinii* Wassh.  
*Kalanchoe delagoensis* Eckl. & Zeyh.  
 - *Bryophyllum delagoense* (Eckl. & Zeyh.) Druce  
*Kalanchoe fedtschenkoi* Raym.-Hamet & H.Perrier  
 - *Bryophyllum fedtschenkoi* (Raym.-Hamet & H.Perrier) Lauz.-March.  
*Kalanchoe pinnata* (Lam.) Pers.  
 - *Bryophyllum pinnatum* (Lam.) Oken  
*Kalanchoe prolifera* (Bowie ex Hook.) Raym.-Hamet  
 - *Bryophyllum proliferum* Bowie ex Hook.  
*Kalanchoe x laetivirens* Desc.  
 - *Kalanchoe laetivirens* Desc.  
*Kickxia elatine* (L.) Dumort subsp. *elatine*  
 - *Kickxia elatine* (L.) Dumort.  
*Kroenleinia grusonii* (Hildm.) Lodé  
 - *Echinocactus grusonii* Hildm.  
*Kumara plicatilis* (L.) G.D.Rowley  
 - *Aloe plicatilis* (L.) Burm.f.  
*Lactuca viminea* (L.) J.Presl & C.Presl. subsp. *ramosissima* (All.) Arcang.  
 - *Lactuca ramosissima* (All.) Gren. & Godr.  
 - *Lactuca viminea* subsp. *ramosissima* (Gren. & Godr.) Bonnier  
*Lathyrus articulatus* L.  
 - *Lathyrus clymenum* L.  
*Lathyrus oleraceus* L. subsp. *elatius* (M.Bieb.) Asch. & Graebn.  
 - *Pisum elatius* M.Bieb.  
 - *Pisum sativum* L. subsp. *elatius* (M.Bieb.) Asch. & Graebn.  
*Lathyrus oleraceus* Lam.  
 - *Pisum sativum* L.  
*Lavandula buchii* Webb & Berthel. var. *buchii*  
 - *Lavandula buchii* Webb & Berthel.  
*Lavandula canariensis* (L.) Mill. subsp. *canariensis*  
 - *Lavandula canariensis* (L.) Mill.  
*Lavandula pedunculata* (Mill.) Cav.  
 - *Lavandula stoechas* subsp. *pedunculata* (Mill.) Samp. ex Rozeira  
*Lavandula stoechas* L. subsp. *stoechas*  
 - *Lavandula stoechas* L.  
*Lens nigricans* (M.Bieb.) Godr.  
 - *Lens nigricans* (M.Bieb.) Webb & Berthel.  
 - *Vicia lentoides* (Ten.) Coss. & Germ.  
*Leontodon saxatilis* Lam. subsp. *rothii* Maire  
 - *Thrincia hispida* Roth.  
*Leontodon saxatilis* Lam.  
 - *Leontodon taraxacoides* (Vill.) Mérat  
 - *Loentodon longirostis* (Finch & P.D.Sell) Talavera  
 - *Thrincia hispida* Roth.

*Leopoldia comosa* (L.) Parl.  
 - *Muscari comosum* (L.) Mill.  
*Lepidium didymum* L.  
 - *Coronopus didymus* (L.) Sm.  
*Leucaena leucocephala* (Lam.) de Wit subsp. *glabrata* (Rose) Zarate  
 - *Leucaena glabrata* Rose  
*Leuzea cynaroides* (C.Sm.) Font Quer ex G.López  
 - *Rhaponticum canariense* DC.  
*Limonium arboreum* Erben, A.Santos & Reyes-Bet.  
 - *Limonium arborescens* [Deviating spelling]  
*Limonium brassicifolium* (Webb & Berthel.) Kuntze subsp. *macropterum* (Webb & Berthel.) G. Kunkel  
 - *Limonium macropterum* (Webb & Berthel.) Kuntze  
*Limonium lobatum* (L.f.) Chaz.  
 - *Limonium thouinii* (Viv.) Kuntze  
*Limonium ovalifolium* (Poir.) Kuntze subsp. *canariense* Pignatti  
 - *Limonium bollei* (Webb ex Wangerin) Erben  
*Limonium ovalifolium* (Poir.) Kuntze  
 - *Limonium gallicum* (Pignatti) Domina  
*Limonium sinuatum* (L.) Mill. subsp. *beaumierianum* (Coss. ex Maire) Sauvage & Vindt  
 - *Limonium beaumierianum* (Coss. ex Maire) Maire  
*Lobularia canariensis* (DC.) L. Borgen subsp. *canariensis*  
 - *Lobularia canariensis* (DC.) L. Borgen  
*Logfia clementei* (Willk.) Holub  
 - *Filago clementei* Willk.  
*Logfia gallica* (L.) Coss. & Germ.  
 - *Filago gallica* (L.) L.  
*Logfia minima* (Sm.) Dumort.  
 - *Filago minima* (Sm.) Pers.  
*Lolium arundinaceum* (Schreb.) Darbysh. subsp. *arundinaceum*  
 - *Festuca arundinacea* Schreb.  
*Lolium arundinaceum* (Schreb.) Darbysh.  
 - *Festuca arundinacea* Schreb.  
 - *Schedonurus arundinaceus* (Schreb.) Dumort.  
*Lolium atlantigenum* (St.-Yves) Banfi, Galasso, Foggi, Kopecký & Ardenghi  
 - *Festuca arundinacea* Schreb. subsp. *atlantigena* (St.-Yves) Auquier  
*Lolium edwardii* H.Scholz, Stierst. & Gaisberg  
 - *Lolium canariense* Steud.  
*Lolium lowei* Menezes  
 - *Lolium rigidum* Gaudin  
*Lolium mediterraneum* Schreb.  
 - *Festuca arundinacea* Schreb. *mediterranea* (Hack.) Franco & Rocha Afonso

*Lolium parabolicae* Sennen  
 - *Lolium rigidum* Gaudin  
*Lolium rigidum* Gaudin  
 - *Lolium lowei* Menezes  
 - *Lolium subulatum* Vis  
*Lonicera hildebrandtiana* Collett & Hemsl.  
 - *Lonicera hildebrandiana* [Deviating spelling]  
*Lonicera ligustrina* Wall.  
 - *Lonicera nitida* E.H. Wilson  
 - *Lonicera pileata* Oliv.  
*Lotus broussonetii* Choisy ex Ser.  
 - *Dorycnium broussonetii* (Choisy ex Ser. in DC.) Webb & Berthel.  
*Lotus campylocladus* Webb & Berthel. subsp.  
*hillebrandii* (Christ) Sandral & D.D.Sokoloff  
 - *Lotus hillebrandii* H. Christ  
*Lotus eriophthalmus* Webb & Berthel.  
 - *Dorycnium eriophthalmum* Webb & Berthel.  
*Lotus glaucus* Sol.  
 - *Lotus glaucus* Dryand. in Aiton  
*Lotus spectabilis* Choisy ex Ser.  
 - *Dorycnium spectabile* (Choisy ex Ser. in DC.) Webb & Berthel.  
*Lotus tenellus* (Lowe) Sandral, A.Santos & D.D.Sokoloff  
 - *Lotus leptophyllus* (Lowe) K.Larsen  
*Lupinus angustifolius* L.  
 - *Lupinus varius* L.  
*Lycianthes rantonnetii* (Carrière) Bitter  
 - *Lycianthes rantonnei* [Deviating spelling]  
*Lycianthes virgata* (Lam.) Bitter  
 - *Solanum virgatum* Lam.  
*Lycium intricatum* Boiss.  
 - *Lycium schweinfurthii* Dammer  
 - *Lycium shawii* Roem. & Schult.  
*Lycium shawii* Roem. & Schult.  
 - *Lycium intricatum* Boiss.  
*Lysimachia arvensis* (L.) U. Manns & Anderb.  
 - *Anagallis arvensis* L.  
*Lysimachia foemina* (Mill.) U. Manns & Anderb.  
 - *Anagallis arvensis* L. subsp. *foemina* (Mill.) Schinz & Thell.  
*Lysimachia linum-stellatum* L.  
 - *Asterolinon linum-stellatum* (L.) Duby in DC.  
*Macrochloa tenacissima* (L.) Kunth.  
 - *Stipa tenacissima* L.  
*Malephora crocea* (Jacq.) Schwantes  
 - *Malephora crocera*  
*Malva acerifolia* (Cav.) Alef. var. *acerifolia*  
 - *Lavatera acerifolia* Cav.  
 - *Malva caneriensis* M.F.Ray  
*Malva acerifolia* (Cav.) Alef. var. *hariensis* Svent.  
 - *Lavatera acerifolia* Cav.  
 - *Malva caneriensis* M.F.Ray

*Malva acerifolia* (Cav.) Alef.  
 - *Lavatera acerifolia* Cav.  
 - *Malva caneriensis* M.F.Ray  
*Malva arborea* (L.) Webb & Berthel.  
 - *Lavatera arborea* L.  
*Malva durieui* Spach  
 - *Lavatera mauritanica* Durieu  
 - *Malva davaei* subsp. *mauritanica* (Durieu) Valdés  
*Malva longiflora* (Boiss. & Reut.) Soldano, Banfi & Galasso  
 - *Althaea longiflora* Boiss. & Reut.  
*Malva multiflora* (Cav.) Soldano, Banfi & Galasso  
 - *Lavatera cretica* L.  
 - *Malva pseudolavatera* Webb & Berthel.  
*Malva phoenicea* (Vent.) Alef.  
 - *Lavatera brachyfolia* Walp  
 - *Navaea phoenicea* (Vent.) Webb & Berthel.  
*Malva pseudolavatera* Webb & Berthel.  
 - *Malva multiflora*  
*Malvastrum coromandelianum* (L.) Garcke subsp. *coromandelianum*  
 - *Malvastrum coromandelianum* (L.) Garcke  
*Marcus-kochia littorea* (L.) Al-Shehbaz  
 - *Malcolmia littorea* (L.) Aiton  
 - *Malcolmia littorea* (L.) R.Br.  
*Marsilea quadrifolia* L.  
 - *Marsilea minuta* L.  
*Matthiola bolleana* Webb ex Christ subsp. *bolleana*  
 - *Matthiola fruticulosa* (L.) Maire  
 - *Matthiola longipetala* (Vent.) DC.  
*Matthiola bolleana* Webb ex Christ subsp. *morocera* (Christ) Reyes-Betancort  
 - *Matthiola livida* var. *morocera* Christ  
 - *Matthiola longipetala* (Vent.) DC. subsp. *livida*  
*Matthiola bolleana* Webb ex Christ subsp. *viridis* (Conti) Reyes-Bet.  
 - *Matthiola longipetala* (Vent.) DC. (Delile) subsp. *viridis* (Conti) Maire  
*Matthiola bolleana* Webb ex Christ  
 - *Matthiola fruticulosa* (L.) Maire  
 - *Matthiola longipetala* (Vent.) DC.  
*Matthiola fruticulosa* (L.) Maire subsp. *bolleana*  
 - *Matthiola bolleana* Webb ex Christ  
*Matthiola fruticulosa* (L.) Maire subsp. *fruticulosa*  
 - *Matthiola bolleana* Webb ex Christ subsp. *bolleana*  
*Matthiola fruticulosa* (L.) Maire subsp. *morocera*  
 - *Matthiola bolleana* Webb ex Christ subsp. *morocera* (Christ) Reyes-Bet.  
*Matthiola fruticulosa* (L.) Maire  
 - *Matthiola bolleana* Webb ex Christ  
*Matthiola incana* (L.) R.Br. subsp. *incana*  
 - *Matthiola incana* (L.) R.Br.

*Maurandya barclayana* Lindl.  
 - *Maurandya barclayana* Lindl.  
*Medicago intertexta* (L.) Mill. subsp. *ciliaris* (L.)  
 Ponert  
 - *Medicago ciliaris* (L.) Krock.  
*Medicago italica* (Mill.) Fiori  
 - *Medicago tornata* subsp. *helix* (Willd.) Ooststr.  
 & Reichg.  
*Medicago monspeliaca* (L.) Trautv.  
 - *Trigonella monspeliaca* L.  
*Medicago tornata* (L.) Mill.  
 - *Medicago italica* (Mill.) Grande  
*Megathyrsus maximus* (Jacq.) B.K.Simon &  
 S.W.L.Jacobs  
 - *Panicum maximum* Jacq.  
*Melaleuca glauca* (DC.) Craven  
 - *Callistemon speciosus* (Sims) Colvill ex Sweet  
*Melaleuca linearis* Schrad. & J.C.Wendl.  
 - *Callistemon linearis* (Schrad. & J.C.Wendl.)  
 Colv. ex Sweet  
 - *Callistemon rigidus* R.Br.  
*Melaleuca viminalis* (Sol. ex Gaertn.) Byrnes  
 - *Callistemon viminalis* (Sol. ex Gaertn.) G.Don  
*Melica minuta* L. subsp. *latifolia* L. (Coss.)  
 W.Hempel  
 - *Melica minuta* L.  
*Melilotus officinalis* (L.) Lam.  
 - *Melilotus officinalis* (L.) Pall.  
*Melinis repens* (Willd.) Zizka subsp. *repens*  
 - *Melinis repens* (Willd.) Zizka  
*Mesembryanthemum theurkauffii* (Maire) Maire  
 - *Mesembryanthemum cryptanthum* Hook.fil.  
*Micromeria ericifolia* (Roth) Bornm.  
 - *Micromeria hyssopifolia* P.Pérez subsp.  
*hyssopifolia*  
*Micromeria helianthemifolia* P.Pérez & Kunkel var.  
*helianthemifolia*  
 - *Micromeria helianthemifolia* Webb & Berthel.  
*Micromeria helianthemifolia* P.Pérez & Kunkel var.  
*mary-annae* P.Pérez & G.Kunkel  
 - *Micromeria helianthemifolia* Webb & Berthel.  
*Micromeria hyssopifolia* Webb & Berthel. var.  
*glabrescens*  
 - *Micromeria ericifolia* (Roth) Bornm. var.  
*ericifolia*  
*Micromeria hyssopifolia* Webb & Berthel. var.  
*hyssopifolia*  
 - *Micromeria ericifolia* (Roth) Bornm. var.  
*ericifolia*  
*Micromeria hyssopifolia* Webb & Berthel. var.  
*kuegleri*  
 - *Micromeria ericifolia* (Roth) Bornm. var.  
*ericifolia*

*Micromeria hyssopifolia* Webb & Berthel.  
 - *Micromeria ericifolia* (Roth) Bornm. var.  
*ericifolia*  
*Micromeria lasiophylla* Webb & Berthel. subsp.  
*lasiophylla* (Bolle) P.Pérez  
 - *Micromeria lasiophylla* Webb & Berthel.  
*Micromeria lasiophylla* Webb & Berthel. subsp.  
*palmensis* (Bolle) P.Pérez  
 - *Micromeria herpyllomorpha* subsp. *palmensis*  
 (Bolle) Puppo  
*Micromeria lepida* Webb & Berthel. subsp. *lepida*  
 P.Pérez  
 - *Micromeria lepida* Webb & Berthel.  
*Micromeria maderensis* Puppo & Bräuchler  
 - *Micromeria varia* Benth. subsp. *thymoides*  
 (Sol. ex Lowe) P.Pérez  
*Micromeria rupestris* (Webb & Berthel.) Puppo  
 - *Micromeria varia* Benth. subsp. *rupestris*  
 (Webb & Berthel.) P. Pérez  
*Micromeria teneriffae* P.Pérez var. *cordifolia*  
 P.Pérez  
 - *Micromeria teneriffae* (Poir.) Benth. ex G.Don  
*Micromeria teneriffae* P.Pérez var. *teneriffae*  
 - *Micromeria teneriffae* (Poir.) Benth. ex G.Don  
*Micromeria tenuis* (Link) Webb & Berthel. subsp.  
*tenuis* P. Pérez  
 - *Micromeria tenuis* (Link) Webb & Berthel.  
*Micromeria varia* Benth. subsp. *canariensis* P.Pérez  
 - *Micromeria canariensis* (P.Perez) Puppo  
 subsp. *canariensis*  
*Micromeria varia* Benth. subsp. *gomerensis* P.Pérez  
 - *Micromeria gomerensis* (P.Perez) Puppo  
*Micromeria varia* Benth. subsp. *hierrensis* P.Pérez  
 - *Micromeria hierrensis* (P. Perez) Puppo  
*Micromeria varia* Benth. subsp. *meridialis* P.Pérez  
 - *Micromeria canariensis* (P.Perez) Puppo  
 subsp. *meridialis* (P.Perez) Puppo  
*Micromeria varia* Benth. subsp. *rupestris* (Webb &  
 Berthel.) P. Pérez  
 - *Micromeria rupestris* (Webb & Berthel.)  
 Puppo  
*Micromeria varia* Benth. subsp. *thymoides* (Sol. ex  
 Lowe) P.Pérez  
 - *Micromeria maderensis* Puppo & Bräuchler  
*Micromeria varia* Benth.  
 - *Micromeria ericifolia* (Roth) Bornm.  
*Monanthes dasyphylla* Svent.  
 - *Monanthes minima* (Bolle) Svent.  
*Monanthes niphophila* Svent.  
 - *Monanthes brachycaulos* (Webb. & Berth.) R.  
 Lowe  
*Monanthes polyphylla* (Aiton) Haw. subsp.  
*amydros*  
 - *Monanthes amydros* Svent.

*Monanthes polyphylla* (Aiton) Haw. subsp.  
*polyphylla*  
 - *Monanthes polyphylla* (Aiton) Haw.  
*Monanthes polyphylla* (Aiton) Haw.  
*Monanthes polyphylla* (Aiton) Haw.  
*Monanthes praegeri* Bramwell  
 - *Monanthes brachycaulos* (Webb. & Berth.) R.  
 Lowe  
*Monanthes purpurascens* (Bolle & Webb) Christ  
 - *Monanthes x purpurascens* (Bolle & Webb)  
 Christ  
*Monanthes silensis* (Praeger) Svent.  
 - *Monanthes pallens* (Webb. in Christ) Christ  
*Monanthes subcrassicaulis* (Kuntze) Praeger  
 - *Monanthes muralis* (Webb ex Bolle) Christ  
*Morella rivas-martinezii* A.Santos & J.Herb.  
 - *Myrica rivas-martinezii* A.Santos  
*Myrica faya* Aiton  
 - *Morella faya* (Aiton) Wilbur  
*Myriopus candidulus* (Miers) Feuillet  
 - *Ceballosia fruticosa* (L.f. ex G.Kunkel)  
 G.Kunkel ex Förther  
 - *Tournefortia candidula* (Miers) I.M.Johnst.  
*Nanorrhinum sagittatum* (Poir.) Yousefi & Zarre;  
 - *Kickxia sagittata* (Poir.) Rothm.  
*Nanorrhinum scoparium* (Brouss. ex Spreng.)  
 Yousefi & Zarre  
 - *Kickxia scoparia* (Brouss. ex Spreng.)  
 G.Kunkel & Sunding  
*Nanorrhinum urbanii* (Pit.) Yousefi & Zarre  
 - *Kickxia urbanii* (Pit.) K.Larsen  
 - *Nanorrhinum urbani* [Deviating spelling]  
*Nasturtium officinale* R.Br.  
 - *Rorippa nasturtium-aquaticum* (L.) Hayek  
*Odontonema callistachyum* (Schltdl. & Cham.)  
 Kuntze  
 - *Thysacanthus callistachyus* (Cham. & Schltdl.)  
 Nees  
*Odontonema tubaeforme* (Bertol.) Kuntze  
 - *Odontonema strictum* (Nees) Kuntze  
 - *Thysacanthus tubaeformis* (Bertol.) Nees  
*Oenothera lindheimeri* (Engelm. & A.Gray)  
 W.L.Wagner & Hoch  
 - *Gaura lindheimeri* Engelm. & A.Gray  
*Ogastemma pusillum* (Coss. & Durieu ex Bonnet &  
 Barratte) Brummitt  
 - *Megastoma pusillum* Coss. & Durieu  
*Olea europaea* L. subsp. *europaea*  
 - *Olea europaea* L.  
*Olea europaea* L. subsp. *guanchica* P. Vargas & al.  
 - *Olea cerasiformis* Rivas Mart. & del Arco  
*Oloptum miliaceum* (L.) Röser & Hamasha  
 - *Achnatherum miliaceum* (L.) P.Beauv.  
 - *Piptatherum miliaceum* (L.) Coss.

*Ononis angustissima* Lam.  
 - *Ononis natrix* Lam. subsp. *angustissima* (Lam.)  
 Sirj.  
*Ononis dentata* Sol. ex Lowe  
 - *Ononis reclinata* (Lowe) Lainz subsp. *dentata*  
 (Lowe) Lainz  
*Ononis hesperia* (Maire) H. Förther & D. Podlech  
 - *Ononis natrix* subsp. *hesperia* Maire  
*Ononis natrix* Lam. subsp. *angustissima* (Lam.) Siri.  
 - *Ononis angustissima* Lam.  
*Ononis natrix* Lam. subsp. *hesperia* Maire  
 - *Ononis hesperia* (Maire) H. Förther & D.  
 Podlech  
 - *Ononis natrix* subsp. *hesperia* (Maire) Förther  
 & Podl.  
*Ononis reclinata* L. subsp. *mollis* (Savi) Bég.  
 - *Ononis mollis* Savi  
*Ononis sicula* Guss.  
 - *Ononis viscosa* L. subsp. *sicula* (Guss.) Hub.-  
 Mor.  
*Onopordum micropterum* Pau  
 - *Onopordum nogalesii* Svent.  
*Opuntia engelmannii* Salm-Dyck ex Engelm. var.  
*lindheimeri* (Engelm.) B.D.Parfitt & Pinkava  
 - *Opuntia lindheimeri* Engelm.  
*Opuntia ficus-indica* (L.) Mill.  
 - *Opuntia vulgaris* Mill.  
*Opuntia monacantha* (Willd.) Haw.  
 - *Opuntia ficus-indica*  
 - *Opuntia vulgaris*  
*Orchis canariensis* Lindl.  
 - *Orchis patens* subsp. *canariensis* (Lindl.) Asch.  
 & Graebn.  
*Orchis mascula* (L.) L. subsp. *lapalmensis* Leibbach  
 & Ruedi Peter  
 - *Orchis mascula* (L.) L.  
*Oreocereus pseudofossulatus* D.R.Hunt  
 - *Oreocereus fossulatus* (Labour.) Backeb.  
*Origanum vulgare* L. subsp. *virens* (Hoffmanns. &  
 Link) Ietsw.  
 - *Origanum virens* Hoffmanns. & Link  
*Ornithogalum arabicum* L.  
 - *Melomphis arabica* (L.) Raf.  
*Ornithogalum narbonense* L.  
 - *Loncomelos narbonense* (L.) Raf.  
*Ornithogalum pyrenaicum* L.  
 - *Loncomelos pyrenaicum* (L.) J. Holub  
*Orobanchë amethystea* Thuill.  
 - *Orobanchë castellana* (Reuter) Rouy  
*Orobanchë artemisiae-campestris* Vaucher ex  
 Gaudin  
 - *Orobanchë artemisiaecampestris* Vaucher ex  
 Gaudin  
*Orobanchë cernua* Loeffl.  
 - *Orobanchë berthelotii* Webb & Berthel.

- Orobanche gratiosa* (Webb & Berthel.) Linding.  
- *Phelipanche gratiosa* (Webb) Carlón
- Orobanche lavandulacea* (Rchb.) Pomel subsp.  
*trichocalyx* (Webb) Carlón, G. Gómez, Laínz,  
Moreno Mor., Ó. Sánchez & Schneew  
- *Phelipanche lavandulacea* Webb & Berthel.
- Orobanche lavandulacea* (Rchb.) Pomel  
- *Phelipanche lavandulacea* Webb & Berthel.
- Orobanche mutelii* F.W.Schultz  
- *Phelipanche mutelii* (F. W. Schultz) Pomel
- Orobanche nana* Noe ex Rchb.  
- *Phelipanche nana* (Reut.) Soják
- Orobanche purpurea* Jacq.  
- *Phelipanche purpurea* (Jacq.) Soják
- Orobanche ramosa* L.  
- *Phelipanche ramosa* (L.) Pomel
- Orobanche schultzei* Mutel  
- *Phelipanche schultzei* (Mutel) Pomel
- Orobanche trichocalyx* (Webb & Berthel.) Beck  
- *Orobanche lavandulacea* Rchb.  
- *Phelipanche lavandulacea* Webb & Berthel.
- Oxalis corniculata* L.  
- *Oxalis corniculatus* [Deviating spelling]  
- *Oxalis repens* Thunb.
- Oxalis debilis* Kunth  
- *Oxalis corymbosa* DC.  
- *Oxalis debilis* var. *corymbosa* (DC.) Lourteig
- Oxybasis glauca* (L.) S.Fuentes, Uotila & Borsch  
- *Chenopodium glaucum* L.
- Oxybasis urbica* (L.) S.Fuentes, Uotila & Borsch  
- *Chenopodium urbicum* L.
- Pallenis spinosa* (L.) Cass. subsp. *maroccana*  
(Aurich & Podlech) Greuter  
- *Pallenis spinosa* subsp. *maroccanus* Aurich & Podlech
- Pallenis spinosa* (L.) Cass.  
- *Asteriscus spinosus* (L.) Sch.Bip.
- Panicum miliaceum* L. subsp. *agricola* H. Scholz & Mikolás  
- *Panicum miliaceum* L.
- Panicum miliaceum* L. subsp. *miliaceum*  
- *Panicum miliaceum* L.
- Papaver argemone* L.  
- *Roemeria argemone* (L.) C.Morales, R.Mend. & Romero García
- Papaver dodecandrum* (Forssk.) Medik.  
- *Papaver hybridum* L.  
- *Roemeria hybrida* (L.) DC.
- Papaver hybridum* L.  
- *Papaver dodecandrum* (Forssk.) Medik.  
- *Roemeria hybrida* (L.) DC.
- Papaver somniferum* L. subsp. *setigerum* (DC.) Arcang.  
- *Papaver setigerum* DC.
- Paraserianthes lophantha* (Willd.) I.C.Nielsen  
- *Albizia lophantha* (Willd.) I.C. Nielsen
- Parentucellia latifolia* (L.) Caruel  
- *Bellardia latifolia* (L.) Cuatrec.
- Parentucellia viscosa* (L.) Caruel  
- *Bellardia viscosa* (L.) Fisch. & C.A.Mey.
- Paspalidium geminatum* (Forssk.), Stapf in D. Oliver & auct.  
- *Setaria geminata* (Forssk.) Veldkamp
- Patellifolia patellaris* (Moq.) A.J.Scott, Ford-Lloyd & J.T.Williams  
- *Patellifolia procumbens* (C.Sm.) A.J.Scott, Ford-Lloyd & J.T.Williams
- Patellifolia procumbens* (C.Sm.) A.J.Scott, Ford-Lloyd & J.T.Williams  
- *Beta procumbens* Chr.P.Sm.
- Patellifolia webbiana* (Moq.) A.J.Scott, Ford-Lloyd & J.T.Williams  
- *Patellifolia procumbens* (C.Sm.) A.J.Scott, Ford-Lloyd & J.T.Williams
- Pavonia strictiflora* (Hook.) G.L.Esteves  
- *Goethea strictiflora* Hook.  
- *Pavonia strictiflora* (Hook.) Fryxell
- Pericallis appendiculata* (L.f.) B.Nord. var. *appendiculata*  
- *Pericallis appendiculata* (L.f.) B.Nord.
- Pericallis hillebrandii* (Christ) Barquín & Voggenreiter ex Beierkuhnlein, Walentowitz & Welss; Basionym *Senecio hillebrandii* Christ  
- *Pericallis papyracea* (DC.) B.Nord.  
- *Senecio hillebrandii* Christ
- Persea barbujana* (Cav.) Mabb. & Nieto subsp. *barbujana*  
- *Apollonias barbujana* (Cav.) A. Br. subsp. *barbujana*
- Persea barbujana* (Cav.) Mabb. & Nieto subsp. *ceballosi* (Svent.) G.Kunkel  
- *Apollonias barbujana* (Cav.) Bornm. subsp. *ceballosi* (Svent.) G.Kunkel
- Persea barbujana* (Cav.) Mabb. & Nieto  
- *Apollonias barbujana* (Cav.) A. Br.  
- *Laurus barbujana* Cav.  
- *Persea barbujana* (Cav.) Mabb. & Nieto Fel.
- Persicaria decipiens* (R.Br.) K.L.Wilson  
- *Persicaria salicifolia* (Brouss. Ex Willd.) Assenov
- Petunia x atkinsiana* (Sweet) D.Don ex W.H.Baxter  
- *Petunia x atkinsiana* D. Don ex Loudon  
- *Petunia x hybrida* (Hook.) Regel
- Phagnalon rupestre* (L.) DC. subsp. *illyricum* DC (H.Lindb.) Ginzb.  
- *Phagnalon rupestre* subsp. *rupestre* (L.) DC.
- Phagnalon rupestre* (L.) DC. subsp. *rupestre*  
- *Phagnalon rupestre* (L.) DC.

*Phyla nodiflora* (L.) Greene var. *minor* (Gillies & Hook.) N.O'Leary & Múlgura; *Lippia canescens* Kunth  
 - *Phyla canescens* (Kunth) Greene.  
*Picris hieracioides* L.  
 - *Picris hieracioides* Sibth. & Sm.  
*Pimpinella anagodendron* Bolle  
 - *Pimpinella rupicola* Svent.  
*Pimpinella dendroselinum* Webb  
 - *Pimpinella dendrotragium* Webb & Berthel.  
*Pimpinella junonae* Ceballos & Ortuno  
 - *Pimpinella junoniae* [Deviating spelling]  
*Pimpinella rupicola* Svent.  
 - *Pimpinella anagodendron* Bolle  
*Pittosporum coriaceum* Aiton  
 - *Pittosporum coriaceum* Dryand. ex Aiton  
*Plantago coronopus* L.  
 - *Plantago aschersonii* Bolle  
*Platycladus orientalis* (L.) Franco  
 - *Thuja orientalis* L.  
*Plerandra elegantissima* (H.J.Veitch ex Mast.) Lowry, G.M.Plunkett & Frodin  
 - *Schefflera elegantissima* (Veitch ex Mast.) Lowry & Frodin  
*Poa annua* L. subsp. *annua*  
 - *Ochlopoa annua* (L.) H.Scholz subsp. *annua*  
*Poa annua* L. subsp. *raniglumis* (S.E. Fröhner) Chrtek  
 - *Ochlopoa annua* (L.) H.Scholz subsp. *raniglumis* (S.E.Fröhner) H.Scholz & Valdés  
*Poa annua* L.  
 - *Ochlopoa annua* (L.) H.Scholz  
*Poa infirma* Kunth  
 - *Ochlopoa infirma* Humb., Bonpl. & Kunth  
*Polycarpaea corymbosa* (L.) Lam.  
 - *Polycarpaea filifolia* Christ  
*Polycarpon alsinifolium* (Biv.) Arcang.  
 - *Polycarpon alsinifolium* (Biv.) DC.  
 - *Polycarpon tetraphyllum* (L.) L. subsp. *alsinifolium* (Biv.) Arcang.  
*Polycarpon tetraphyllum* (L.) L. subsp. *diphyllum* (Cav.) O. Bolòs & Font Quer  
 - *Polycarpon diphyllum* Cav.  
*Polygonum aviculare* L. subsp. *aviculare*  
 - *Polygonum aviculare* L.  
*Polygonum rurivagum* Jord. et Boreau  
 - *Polygonum aviculare* L. subsp. *rurivagatum* (Jord. ex Boreau) Lindm.  
*Polypogon fugax* Nees ex Steud.  
 - *Agrostis fugax* (Nees ex Steud.) G.H. Loos  
*Polypogon maritimus* Willd.  
 - *Agrostis polypogon* G.H. Loos  
*Pontederia crassipes* Mart.  
 - *Eichhornia crassipes* (Mart.) Solms

*Portulaca papillatostellulata* (Danin & H.G.Baker) Danin  
 - *Portulaca papillato-stellulata*  
*Prunus dulcis* (Mill.) D.A.Webb  
 - *Prunus amygdalus* Batsch  
*Prunus lusitanica* L. subsp. *hixa* (Willd.) Franco  
 - *Prunus hixa* Brouss ex. Willd.  
*Pseuderanthemum maculatum* (G.Lodd.) I.M.Turner  
 - *Pseuderanthemum carruthersii* (Seem.) Guillaumin  
*Psidium cattleianum* Sabine  
 - *Psidium cattleianum* Afzel ex Sabine  
 - *Psidium littorale* Raddi  
*Pterocephalus dumetorum* (Brouss. ex Willd.) Coult.  
 - *Pterocephalus dumetorus* [Deviating spelling]  
*Pulicaria arabica* (L.) Cass. subsp. *hispanica* (Boiss.) Murb.  
 - *Pulicaria paludosa* Link.  
*Pulicaria burchardii* Hutch. subsp. *burchardii*  
 - *Pulicaria burchardii* Hutch.  
*Pulicaria paludosa* Link.  
 - *Pulicaria arabica* (L.) Cass. subsp. *hispanica* (Boiss.) Murb.  
*Pulicaria undulata* (L.) C.A.Mey. subsp. *undulata*  
 - *Pulicaria undulata* (L.) C.A.Mey.  
*Ranunculus baudotii* Godr.  
 - *Ranunculus peltatus* subsp. *baudotii* (Godr.) Meikle ex C.D.K.Cook  
*Ranunculus ficaria* L.  
 - *Ficaria verna* Huds.  
*Ranunculus parviflorus* Loefl.  
 - *Ranunculus parviflorus* L.  
*Raphanus raphanistrum* L. subsp. *raphanistrum*  
 - *Raphanus raphanistrum* L.  
*Raphanus raphanistrum* L. subsp. *sativus* (L.) Domin  
 - *Raphanus sativus* L.  
*Reichardia intermedia* (Sch.Bip) Samp.  
 - *Reichardia intermedia* (Jan ex DC.) Cout.  
*Reseda lancerotae* Webb ex Del.  
 - *Reseda crystallina* Webb & Berthel.  
*Retama monosperma* (L.) Boiss.  
 - *Retama rhodorhizoides* Webb & Berthel.  
*Retama raetam* (Forssk.) Webb & Berthel.  
 - *Retama retam* [Deviating spelling]  
*Rhaphiolepis indica* (L.) Lindl.  
 - *Rhaphiolepis umbellata* (Thunb.) Makino  
*Rhodalsine geniculata* (Poir.) F.N.Williams  
 - *Minuartia geniculata* (Poir.) Thell.  
 - *Moehringia geniculata* (Poir.) Thell  
*Rhodalsine platyphylla* (J.Gay ex Christ) McNeil  
 - *Minuartia platyphylla* (J.Gay ex Christ) McNeil  
 - *Rhodalsine geniculata* (Poir.) F.N.Williams



*Rhodalsine webbii* McNeill & Bramwell  
 - *Minuartia webbii* McNeill & Bramwell  
 - *Rhodalsine geniculata* (Poir.) F.N.Williams  
*Roldana petasitis* (Sims) H.Rob. & Brettell  
 - *Senecio petasitis* DC:  
*Rubia agostinhoi* Dans. & P.Silva  
 - *Rubia occidens* Capelo, M.Seq. & H.Schaef.  
*Rubia fruticosa* Aiton subsp. *melanocarpa*  
 (Bornm.) Bramwell  
 - *Rubia fruticosa* Aiton  
*Rubia fruticosa* Aiton subsp. *periclymenum*  
 (schenk) Sundig  
 - *Rubia fruticosa* Aiton  
*Rubia peregrina* L. subsp. *longifolia* (Poir.) O. Bolós  
 - *Rubia pergrina* L.  
*Ruellia bourgaei* Hemsl.  
 - *Ruellia dipteracanthus* (Nees) Hemsl.  
*Rumex acetosella* L. subsp. *angiocarpus* (Murb.)  
 Murb.  
 - *Rumex angiocarpus* Murb.  
*Rumex acetosella* L. subsp. *pyrenaicus* (Pourr. Ex  
 Lapeyr.) Akeroyd  
 - *Rumex pyrenaicus* Pourr. ex Lapeyr.  
*Rumex crispus* L. subsp. *crispus*  
 - *Rumex crispus* var. *crispus*  
*Rumex induratus* Boiss. Reut.  
 - *Rumex scutatus* (Boiss. & Reut.) Nyman subsp.  
*induratus* (Boiss. & Reut.) Nyman  
*Rumex obtusifolius* L. subsp. *obtusifolius*  
 - *Rumex obtusifolius* L.  
*Rumex pulcher* L. subsp. *pulcher*  
 - *Rumex pulcher* L.  
*Rumex spinosus* L.  
 - *Emex spinosa* (L.) Campd.  
*Sabulina mediterranea* (Ledeb. ex Link) Rchb.  
 - *Minuartia mediterranea* (Ledeb. ex Link)  
 K.Malý  
*Salicornia perennis* Mill.  
 - *Sarcocornia perennis* (Mill.) A.J.Scott  
*Salix fragilis* L.  
 - *Salix fragilis* Forssk.  
 - *Salix x fragilis* L.  
*Salix pedicellata* (C.Sm. ex Link) A.K.Skvortsov  
 subsp. *canariensis* (C.Sm. ex Link)  
 A.K.Skvortsov  
 - *Salix canariensis* C.Sm. ex Link  
*Salix pedicellata* (C.Sm. ex Link) A.K.Skvortsov  
 - *Salix canariensis* C.Sm. ex Link  
*Salsola divaricata* Masson ex Link  
 - *Canarosalsola divaricata* Masson ex Link  
*Salsola kali* L.  
 - *Kali turgida* (Dumort.) Gutermann  
*Salvia aegyptiaca* L.  
 - *Pleudia aegyptiaca* (L.) M.Will, N.Schmalz &  
 Class.-Bockh.

*Salvia africana* L.  
 - *Salvia africana-caerulea* L.  
 - *Salvia aurea* L.  
*Salvia herbanica* A.Santos & M.Fernandez  
 - *Pleudia herbanica* (A.Santos & M.Fernández)  
 M.Will, N.Schmalz & Class.-Bockh.  
*Salvia rosmarinus* Schleid.  
 - *Rosmarinus officinalis* L.  
 - *Salvia rosmarinus* Spenn.  
*Salvinia molesta* D.S. Mitch  
 - *Salvinia adnata* Desv.  
*Sambucus palmensis* Link  
 - *Sambucus nigra* L. subsp. *palmensis* (Link)  
 Bolli  
*Sanguisorba megacarpa* (Lowe) Munoz Garm. &  
 C.Navarro  
 - *Poterium megacarpa* Lowe  
*Sanguisorba menendezii* Svent.  
 - *Dendriopoterium menendezii* Svent.  
*Sanguisorba minor* Scop.  
 - *Poterium sanguisorba* subsp. *sanguisorba* L.  
*Scadoxus puniceus* (L.) Friis & Nordal  
 - *Haemanthus puniceus* L.  
*Scandix brachycarpa* Guss.  
 - *Scandix pecten-veneris* L. subsp. *brachycarpa*  
 (Guss.) Thell.  
*Schefflera actinophylla* (Endl.) Harms  
 - *Brassaia actinophylla* Endl.  
*Schenkia spicata* (L.) G.Mans.  
 - *Centaurium spicatum* (L.) Fritsch  
*Schoenoplectiella supina* (L.) Lye  
 - *Schoenoplectus supinus* (L.) Palla  
*Scilla haemorrhoidalis* Webb & Berthel.  
 - *Autonoe haemorrhoidalis* (webb et Berthel.)  
 Speta  
 - *Scilla dasyantha* Webb & Berthel.  
*Scleranthus annuus* L. subsp. *annuus*  
 - *Scleranthus annuus* L.  
*Scleranthus annuus* L. subsp. *polycarpus* (L.)  
 Bonnier & Layens  
 - *Scleranthus polycarpus* L.  
*Scleranthus polycarpus* L.  
 - *Scleranthus annuus* L. subsp. *polycarpus* (L.)  
 Bonnier & Layens  
*Scolymus hispanicus* L. subsp. *hispanicus*  
 - *Scolymus hispanicus* L.  
*Scorzonera laciniata* L.  
 - *Podospermum laciniatum* (L.) DC.  
 - *Scorzonera hispanica* subsp. *coronopifolia*  
 (Desf.) Rouy  
*Sedum lancerottense* R.P. Murray  
 - *Sedum nudum* Aiton subsp. *lancerottense*  
 (R.P.Murray) A.Hansen & Sunding  
*Selaginella denticulata* (L.) Spring  
 - *Selaginella kraussiana* (Kunze) A. Braun

*Selenicereus triangularis* (L.) D.R.Hunt  
 - *Hylocereus triangularis* (L.) Britton & Rose  
*Selenicereus undatus* (Haw.) D.R.Hunt  
 - *Hylocereus undatus* (Haw.) Britton & Rose  
*Senecio leucanthemifolius* Poir. var.  
*leucanthemifolius*  
 - *Senecio leucanthemifolius* Poir.  
*Senna didymobotrya* (Fresen.) H.S.Irwin &  
 Barneby  
 - *Cassia didymobotrya*  
*Senna spectabilis* (DC.) H.S.Irwin & Barneby  
 - *Cassia spectabliis*  
*Serapias parviflora* Parl. subsp. *mascaensis*  
 (H.Kretzschmar, G.Kretzschmar & Kreutz)  
 Kreutz  
 - *Serapias mascaensis* H.Kretzschmar,  
 G.Kretzschmar & Kreutz  
 - *Serapias parviflora* Parl.  
*Sesleria albicans* Kit.  
 - *Sesleria caerulea* Opiz  
*Setaria geminata* (Forssk.) Veldkamp  
 - *Paspalidium geminatum* (Forssk.) Stapf  
*Setaria megaphylla* (Steud.) T. Durant & Schinz  
 - *Setaria chevalieri* Stapf.  
*Setaria pumila* (Poir.) Roem. & Schult.  
 - *Setaria helvola* (L.f.) Roem. & Schult.  
*Setaria verticillata* (L.) P.Beauv.  
 - *Setaria adhaerens* (Forssk.) Chiov.  
*Sicyos edulis* Jacq.  
 - *Sechium edule* subsp. *edule* Sw.  
 - *Sechium edule* (Jacq.) Sw.  
*Sideritis cretica* L. subsp. *cretica*  
 - *Sideritis cretica* L.  
*Sideritis cretica* L. subsp. *spicata* (Pit.) Negrin &  
 P.Perez  
 - *Sideritis spicata* (Pit.) Marrero Rodr.  
*Sideritis gomeraea* de Noé ex Bolle  
 - *Sideritis gomerae* Bolle  
*Sideritis lotsyi* (Pit.) Ceballos & Ortuño subsp.  
*lotsyi*  
 - *Sideritis mascaensis* (Svent.) Marrero Rodr.  
*Sideritis mascaensis* (Svent.) Marrero Rodr.  
 - *Sideritis lotsyi* (Pit.) Ceballos & Ortuño subsp.  
*mascaensis* Svent.  
 - *Sideritis lotsyi* (Pit.) Ceballos & Ortuño var.  
*mascaensis* Svent.  
*Sideritis oroteneriffae* Négrin & P.Pérez var. *arayae*  
 Négrin & P.Pérez  
 - *Sideritis oroteneriffae* Négrin & P.Pérez  
*Sideritis oroteneriffae* Négrin & P.Pérez var.  
*oroteneriffae*  
 - *Sideritis oroteneriffae* Négrin & P.Pérez  
*Sideritis soluta* Clos subsp. *soluta*  
 - *Sideritis soluta* Clos

*Silene bourgaei* Webb ex Christ  
 - *Silene bourgaei*  
*Silene diversifolia* Otth  
 - *Silene oblongifolia* Otth.  
 - *Silene rubella* subsp. *segetalis* (Dufour)  
 Nyman  
*Silene latifolia* Poir.  
 - *Silene macrocarpa* (Boiss. et Reut) E.H.L.  
 Krause  
 - *Silene vulgaris* subsp. *macrocarpa* Turrill  
 - *Silene vulgaris* subsp. *vulgaris*  
*Silene nocteolens* Webb & Berthel.  
 - *Silene nocteolons* [Deviating spelling]  
*Silene rubella* L.  
 - *Silene oblongifolia* Otth.  
*Silene vulgaris* (Moench) Garcke subsp.  
*angustifolia* Hayek  
 - *Silene vulgaris* subsp. *macrocarpa* Turrill  
 - *Silene vulgaris* subsp. *vulgaris*  
*Silene vulgaris* (Moench) Garcke subsp. *commutata*  
 (Guss.) Hayek  
 - *Silene commutata* Guss.  
 - *Silene nutans* L.  
*Silene vulgaris* (Moench) Garcke subsp. *vulgaris*  
 - *Silene vulgaris* (Moench) Garcke  
*Solandra grandiflora* Sw.  
 - *Solandra nitida* Zuccagni  
*Solanum alatum* Moench  
 - *Ambiguous* synonym Catalogue of Life  
 - *Homotypic* synonym World Flora Online  
*Solanum hoehnei* C.V.Morton  
 - *Solanum alatum* Dunal  
*Solanum lycopersicum* L.  
 - *Lycopersicon esculentum* Mill.  
*Solanum nava* Webb & Berthel.  
 - *Normania nava* (Webb & Berthel.) Franc.-Ort.  
 & Lester  
*Solanum nigrum* L.  
 - *Solanum decipiens* Opiz  
*Solanum villosum* Mill. subsp. *miniatum* (Bernh. ex  
 Willd.) Edmonds  
 - *Solanum alatum* Moench  
*Solanum villosum* Mill. subsp. *villosum*  
 - *Solanum villosum* (L.) Willd.  
*Sonchus asper* (L.) Hill subsp. *asper*  
 - *Sonchs asper* (L.) Hill  
*Sonchus asper* (L.) Hill subsp. *glaucescens* (Jord.)  
 Ball ex Ball  
 - *Sonchus glaucescens* Jord.  
*Sonchus bupleuroides* (Font Quer) N.Kilian &  
 Greuter  
 - *Sventenia bupleuroides* Font Quer  
*Sonchus esperanzae* N.Kilian & Greuter  
 - *Lactucosonchus beltraniae* (U. Reifenberger &  
 A. Reifenberger) Bramwell

- Sonchus gomeraensis* Boulos  
 - *Sonchus gomerensis* [Deviating spelling]  
*Sonchus pendulus* (Sch.Bip.) Sennikov subsp.  
*flaccidus* (Svent.) N.Kilian & Greuter  
 - *Chrysoprenanthes pendula* (Sch. Bip.)  
 Bramwell subsp. *flaccida* (Svent.) Bramwell  
*Sonchus pendulus* (Sch.Bip.) Sennikov subsp.  
*pendulus*  
 - *Chrysoprenanthes pendula* (Sch. Bip.)  
 Bramwell  
*Sonchus pendulus* (Sch.Bip.) Sennikov  
 - *Chrysoprenanthes pendula* (Sch. Bip.)  
 Bramwell  
 - *Prenanthes pendula* Sch.Bip.  
*Sonchus platylepis* Webb  
 - *Babcockia platylepis* (Webb) Boulos  
*Sonchus webbii* Sch.Bip.  
 - *Lactucosonchus webbii* (Sch. Bip.) Svent.  
*Spergularia bocconei* (Scheele) Asch. & Graebn.  
 - *Spergularia bourgeauii* Lebel  
*Spergularia bourgaei* Lebel  
 - *Spergularia bocconei* (Scheele) Graebn.  
*Spergularia flaccida* (Madden) I.M.Turner  
 - *Spergula fallax* (Lowe) E.H.L.Krause  
*Spergularia marina* (L.) Besser  
 - *Spergularia salina* J.Presl & C.Presl  
*Spirobassia hirsuta* (L.) Freitag & G. Kadereit  
 - *Bassia crassifolia* (Pall.) Soldano  
*Spirodela punctata* (G.Mey.) C.H.Thomps.  
 - *Landoltia punctata* (G. Mey.) Les & D. J.  
 Crawford  
*Stachys germanica* L. subsp. *cordigera* Briq.  
 - *Stachys germanica* L.  
*Stellaria apetala* Ucria  
 - *Stellaria apetala* Bernardino  
 - *Stellaria media* (L.) Vill.  
 - *Stellaria pallida* (Dumort.) Crép.  
*Stenocereus dumortieri* (Scheidew.) Buxb.  
 - *Isolatocereus dumortieri* (Scheidw.) Backeb.  
*Stenocereus pruinosus* (Otto ex Pfeiff.) Buxb.  
 - *Neogriseocereus pruinosus* (Otto ex Pfeiff.)  
 Guiggi  
*Stephanotis floribunda* Jacques  
 - *Marsdenia floribunda* (Brongn.) Schltr.  
 - *Stephanotis floribunda* Brongn  
*Stipellula capensis* (Thunb.) Röser & Hamasha  
 - *Stipa capensis* Thunb.  
*Suaeda vera* Forssk. ex J.F.Gmel.  
 - *Suaeda fruticosa* Forssk. ex J.F. Gmelin  
*Suaeda vermiculata* Forssk. ex J.F.Gmel.  
 - *Suaeda mollis* (Desf.) Delile  
*Syagrus weddelliana* (H.Wendl.) Becc.  
 - *Lytocaryum weddellianum* (H.Wendl.) Toledo  
*Symphyotrichum subulatum* (Michx.) G.L.Nesom  
 subsp. *squamatum* (Spreng.) S.D.Sundb.  
 - *Aster squamatus* (Spreng.) Hieron.  
 - *Symphyotrichum squamatum* (Spreng.)  
 G.L.Nesom  
*Symphyotrichum subulatum* (Michx.) G.L.Nesom  
 - *Aster subulatus* (Michx.) Hort. ex Michx.  
 - *Symphyotrichum squamatum* (Spreng.)  
 G.L.Nesom  
*Tagetes erecta* L.  
 - *Tagetes patula* L.  
*Tara spinosa* (Molina) Britton & Rose  
 - *Caesalpinia spinosa* (Molina) Kuntze  
*Taraxacum campylodes* G.E.Haglund  
 - *Taraxacum vulgare* (Lam.) Schrank (unplaced  
 in POWO)  
*Taraxacum canarense* Soest  
 - *Taraxacum canariense* Soest  
*Taraxacum officinale* F.H.Wigg  
 - *Taraxacum campylodes* G.E.Haglund  
 - *Taraxacum vulgare* Schrank.  
*Tecomaria capensis* (Thunb.) Spach  
 - *Tecoma capensis* (Thunb.) Lindl.  
*Teline canariensis* (L.) Webb & Berthel.  
 - *Genista canariensis* L.  
*Teline microphylla* P.E.Gibbs & Dingwall  
 - *Cytisus congestus* (Webb & Berthel.) Ball  
 - *Genista microphylla* DC.  
 - *Teline s.* subsp. *microphylla*  
*Teline nervosa* (Esteve) Hansen & Sund.  
 - *Rivasgodaya nervosa* Esteve  
*Teline osyrioides* (Svent.) P.E.Gibbs & Ding subsp.  
*osyrioides*  
 - *Cytisus osyrioides* P.E.Gibbs & Ding subsp.  
*osyrioides*  
*Teline osyrioides* (Svent.) P.E.Gibbs & Ding  
 - *Cytisus osyrioides* Gibbs & Dingwall  
 - *Teline osyrioides* Gibbs & Dingwall [Deviating  
 spelling]  
*Teline pallida* (Poir.) G. Kunkel subsp. *gomerae*  
 - *Genista linifolia* subsp. *pallida* (Poir.) Hanelt  
*Teline pallida* (Poir.) G. Kunkel subsp. *pallida*  
 - *Genista linifolia* subsp. *pallida* (Poir.) Hanelt  
*Teline pallida* (Poir.) G. Kunkel subsp. *silensis*  
 - *Genista linifolia* subsp. *pallida* (Poir.) Hanelt  
*Teline pallida* (Poir.) G. Kunkel  
 - *Genista linifolia* subsp. *pallida* (Poir.) Hanelt  
*Teline rosmarinifolia* Webb & Berthel. subsp.  
*eurifolia*  
 - *Genista linifolia* L. subsp. *eurifolia*  
*Teline rosmarinifolia* Webb & Berthel. subsp.  
*rosmarinifolia* Arco  
 - *Cytisus rosmarinifolius* (Webb & Berthel.)  
 Masf.  
 - *Genista rosmarinifolia* Webb & Berthel. subsp.  
*rosmarinifolia*

- Teline rosmarinifolia* Webb & Berthel.  
 - *Cytisus rosmarinifolius* (Webb & Berthel.) Masf.  
 - *Genista linifolia* L.  
 - *Genista rosmarinifolia*
- Teline splendens* (Webb & Berthel.) del Arco  
 - *Genista splendens* Webb & Berthel.  
 - *Teline linifolia* subsp. *pallida* (Poir.) P.E.Gibbs & Dingwall
- Teline stenopetala* (Webb & Berthel.) Webb & Berthel.  
 - *Genista stenopetala* Webb & Berthel.
- Tephrocactus articulatus* (Pfeiff.) Backeb.  
 - *Opuntia articulata* (Pfeiff.) D.R. Hunt
- Thaumatococcus bipinnatifidus* (Schott ex Endl.) Sakur., Calazans & Mayo  
 - *Philodendron bipinnatifidum* Schott ex Endl.
- Thaumatococcus xanadu* (Croat, J.Boos & Mayo) Sakur., Calazans & Mayo  
 - *Philodendron xanadu* Croat, Mayo & J.Boos
- Thelypteris dentata* (Forssk.) E.P.St.John  
 - *Christella dentata* (Forssk.) Brownsey & Jermy  
 - *Cyclosorus dentata* (Forssk.) Ching
- Thesium canariensis* (Stearn) J.C.Manning & F.Forest  
 - *Kunkeliella canariensis* Stearn
- Thesium psilotocladum* Svent.  
 - *Kunkeliella psilotoclada* (Svent.) Stearn
- Thesium retamoides* (A.Santos) J.C.Manning & F.Forest  
 - *Kunkeliella retamoides* A.Santos
- Thesium subsucculentum* (Kämmer) J.C.Manning & F.Forest  
 - *Kunkeliella subsucculenta* Kämmer
- Tolpis barbata* (L.) Gaertn. subsp. *barbata*  
 - *Tolpis barbata* (L.) Gaertn.
- Tolpis umbellata* Bertol.  
 - *Tolpis barbata* (L.) Gaertn. subsp. *umbellata* (Bertol.) Maire
- Torilis arvensis* (Schult.) Thell. subsp. *neglecta* (Schult.) Thell.  
 - *Torilis neglecta* Schult.
- Torilis elongata* (Hoffmanns. & Link) Samp.  
 - *Torilis arvensis* (Huds.) Link subsp. *elongata* (Hoffmanns. & Link) Cannon
- Torilis pseudonodosa* Bianca  
 - *Torilis webbii* Jury
- Torilis webbii* Bianca  
 - *Torilis pseudonodosa* Bianca
- Trichocereus macrogonus* (Salm-Dyck) Riccob.  
 - *Echinopsis macrogona* (Salm-Dyck) Friedrich & G.D.Rowley  
 - *Trichocereus peruvianus* Britton & Rose
- Trichomanes speciosum* Willd.  
 - *Vandenboschia speciosa* (Willd.) G.Kunkel
- Trifolium obscurum* Savi  
 - *Trifolium isodon* Murb.
- Trifolium occidentale* Coombe  
 - *Trifolium repens* subsp. *prostratum* Nyman
- Trifolium oxaloides* Bunge ex Nyman  
 - *Trifolium subterraneum* L. subsp. *oxaloides* Nyman
- Trifolium subterraneum* L.  
 - *Trifolium oxaloides* Bunge ex Nyman  
 - *Trifolium subterraneum* L. subsp. *oxaloides* Nyman
- Trisetaria lapalmae* H.Scholz  
 - *Trisetaria loeflingiana* (L.) Paunero
- Trithrinax brasiliensis* Mart. var. *acanthocoma* (Drude) Mattos  
 - *Trithrinax acanthocoma* Drude
- Triticum aestivum* L. subsp. *aestivum*  
 - *Triticum aestivum* L.
- Triticum turgidum* L. subsp. *durum* (Desf.) Husn.  
 - *Triticum aestivum* subsp. *durum* (Desf.) Thell.  
 - *Triticum durum* Desf.
- Tritium aestivum* L. subsp. *hadropyrum* (Flaksb.) Tzvelev  
 - *Triticum aestivum* L.
- Ulex europaeus* L. subsp. *europaeus*  
 - *Ulex europaeus* L.
- Umbilicus horizontalis* (Guss.) DC.  
 - *Umbilicus gaditanus* Boiss
- Urochloa mutica* (Forssk.) T.Q. Nguyen  
 - *Brachiaria mutica* (Forssk.) Stapf
- Urochloa plantaginea* (Link) R.D.Webster  
 - *Brachiaria plantaginea* (Link) Hitchc.
- Urochloa subquadrifida* (Trin.) R.D.Webster  
 - *Brachiaria subquadrifida* (Trin.) Hitchc.
- Vachellia farnesiana* (L.) Wight & Arn.  
 - *Acacia farnesiana* (L.) Willd.
- Vachellia karroo* (Hayne) Banfi & Galasso  
 - *Acacia karroo* Hayne
- Valeriana calcitrapae* L.  
 - *Centranthus calcitrapa* (L.) Dufr.  
 - *Centranthus calcitrapae* (L.) Dufr.
- Valeriana carinata* (Loisel.) Christenh. & Byng  
 - *Valerianella carinata* Loisel.
- Valeriana coronata* (L.) Mill.  
 - *Valerianella coronata* (L.) DC.
- Valeriana dentata* (L.) All.  
 - *Valerianella dentata* (L.) Pollich.
- Valeriana discoidea* (L.) Willd.  
 - *Valerianella discoidea* (L.) Loisel.
- Valeriana eriocarpa* (Desv.) Christenh. & Byng  
 - *Valerianella eriocarpa* Desv.
- Valeriana locusta* L.  
 - *Valerianella locusta* (L.) Laterr.

- Valeriana rubra* L.  
- *Centranthus ruber* (L.) DC
- Valerianella abyssinica* Fresen.  
- *Valerianella microcarpa* Loisel.
- Valerianella muricata* (Steven ex M.Bieb.)  
W.H.Baxter  
- *Valerianella eriocarpa* Desv.
- Veronica x andersonii* Lindl. & Paxton  
- *Hebe x andersonii* (Lindl. & Paxton) Cockayne
- Viburnum rugosum* Pers.  
- *Viburnum rigidum* Vent.  
- *Viburnum tinus* L. subsp. *rigidum* (Vent.)  
P.Silva
- Vicia lens* (L.) Coss. & Germ.  
- *Lens culinaris* Medik.
- Vicia lutea* L. subsp. *lutea*  
- *Vicia lutea* L.
- Vicia sativa* L. subsp. *cordata* (Wulfen ex T. Hoppe)  
Asch. & Graebn.  
- *Vicia cordata* Wulfen ex Hoppe
- Vicia sativa* L. subsp. *sativa*  
- *Vicia sativa* L.
- Vicia tenuifolia* Roth subsp. *dalmatica* (A.Kern.)  
Greuter  
- *Vicia dalmatica* A. Kern.
- Vicia villosa* Roth subsp. *ambigua* (Guss.)  
Kerguelen  
- *Vicia pseudocracca* Bertol.  
- *Vicia villosa* Roth subsp. *pseudocracca*  
(Bertol.) P. W. Ball
- Viola odorata* L.  
- *Viola odora* Neck.  
- *Viola plantaginea* Webb ex Christ
- Viola plantaginea* Webb ex Christ  
- *Viola odorata* L.
- Visnaga daucooides* Gaertn.  
- *Ammi visnaga* (L.) Lam
- Wahlenbergia lobelioides* (L.f.) Link. subsp.  
*lobelioides*  
- *Wahlenbergia lobelioides* (L.f.) Link.
- Wigandia urens* (Ruiz & Pav.) Kunth  
- *Wigandia caracasana* Kunth  
- *Wigandia kunthii* Choisy
- Xanthium strumarium* L. subsp. *strumarium*  
- *Xanthium italicum* Moretti  
- *Xanthium orientale* L. subsp. *italicum*  
(Moretti) Greuter
- Xanthium strumarium* L.  
- *Xanthium orientale* L.
- Zoysia matrella* (L.) Merr.  
- *Zoysia pacifica* (Goudswaard) M.Hotta &  
Kuroki
- Zygophyllum creticum* (L.) Christenh. & Byng  
- *Fagonia cretica* L.
- Zygophyllum fontanesii* Webb & Berthel.  
- *Tetraena fontanesii* (Webb & Berthel.) Beier &  
Thulin
- Zygophyllum gaetulum* Emb. & Maire subsp.  
*gaetulum*  
- *Tetraena gaetula* (Emb. & Maire) Beier &  
Thulin
- Zygophyllum gaetulum* Emb. & Maire subsp.  
*waterlotii* (Maire) Dobignard, Jacquemoud &  
D.Jord.  
- *Tetraena gaetula* (Emb. & Maire) Beier &  
Thulin subsp. *waterlotii* (Maire) Beier & Thulin  
- *Zygophyllum waterlotii* Maire
- Zygophyllum gaetulum* Emb. & Maire  
- *Tetraena gaetula* (Emb. & Maire) Beier &  
Thulin
